# Supplementary material for: Variations in the Biological Pump through the Miocene: Evidence from organic carbon burial in Pacific Ocean sediments
Source: Copernicus journal article supplement (doi:10.5194/cp-2024-34), 2024-05-27
Supplement: Supplementary file 1 [file SuppTable_S10_1208A_carbon_Data.xlsx]

## Sheet: SuppTable_S10_U1208A_carbon_Dat
Site	Hole	Core	Type	Section	Interval (cm)	Depth (mbsf)	Age (Ma)	Bulk MAR (g/cm2/kyr)	CaCO3 (wt %)	CaCO3 MAR (g/cm2/kyr)	C-org (wt %)	C-org MAR (g/cm2/kyr)
1208	A	1	H	1	40	0.4	0.00727866	3.26989	46.0197	1.50479	0.55764	0.0182342
1208	A	1	H	4	51	4.31	0.0784275	3.28131	32.7158	1.07351	0.498265	0.0163496
1208	A	2	H	3	93	8.63	0.157037	3.37598	40.4468	1.36548	0.501188	0.01692
1208	A	2	H	6	53	12.73	0.231643	3.78516	22.3467	0.845858	0.231328	0.00875613
1208	A	3	H	2	53	16.23	0.295332	2.29669	34.3262	0.788366	0.647433	0.0148695
1208	A	3	H	5	91	21.11	0.384131	3.53998	39.593	1.40158	0.312104	0.0110484
1208	A	4	H	2	61	25.81	0.469655	3.65511	43.4036	1.58645	0.412409	0.015074
1208	A	4	H	5	89	30.59	0.556635	4.69176	71.5685	3.35782	0.145972	0.00684867
1208	A	5	H	1	109	34.29	0.623963	3.92085	46.1655	1.81008	0.184772	0.00724461
1208	A	5	H	4	58	38.28	0.696568	3.78144	30.8082	1.16499	0.424089	0.0160367
1208	A	5	H	7	59	42.79	0.778634	3.43312	20.3384	0.698242	0.294268	0.0101026
1208	A	6	H	3	89	46.59	0.859724	5.48135	25.3978	1.39214	0.278483	0.0152646
1208	A	6	H	6	95	51.15	0.95754	3.23531	52.1782	1.68813	0.279241	0.0090343
1208	A	7	H	2	67	54.37	1.0341	4.31083	55.6442	2.39873	0.23318	0.010052
1208	A	7	H	7	35	61.55	1.18206	3.46019	59.9513	2.07443	0.303083	0.0104873
1208	A	8	H	4	108	67.28	1.32753	3.33831	67.7446	2.26152	0.145592	0.0048603
1208	A	9	H	1	89	72.09	1.44974	2.85076	28.8009	0.821045	0.40775	0.011624
1208	A	9	H	4	94	76.64	1.56534	3.01949	46.7981	1.41306	0.241652	0.00729665
1208	A	9	H	6	94	79.64	1.64156	2.88151	45.8954	1.32248	0.279366	0.00804997
1208	A	10	H	2	89	83.09	1.72922	3.1096	53.8742	1.67527	0.145616	0.00452807
1208	A	10	H	5	93	87.63	1.83409	3.31899	55.0239	1.82624	0.243618	0.00808565
1208	A	11	H	1	89	91.09	1.90817	3.29291	53.9319	1.77593	0.165881	0.00546232
1208	A	11	H	4	90	95.6	2.01742	3.1122	53.3854	1.66146	0.197537	0.00614775
1208	A	11	H	7	54	99.74	2.12489	3.66788	63.732	2.33761	0.218938	0.00803039
1208	A	12	H	3	90	103.6	2.20882	3.10845	53.5133	1.66343	0.305589	0.00949908
1208	A	12	H	6	90	108.1	2.31448	3.15245	28.3923	0.895053	0.356877	0.0112504
1208	A	13	H	2	90	111.6	2.39667	3.29518	60.0456	1.97861	0.117133	0.00385975
1208	A	13	H	6	90	117.6	2.53756	3.58513	46.5009	1.66712	0.269499	0.00966191
1208	A	14	H	1	90	119.6	2.58469	3.30673	56.9587	1.88347	0.183888	0.00608067
1208	A	14	H	4	93	124.13	2.69602	3.71273	73.1646	2.7164	0.146682	0.00544592
1208	A	14	H	7	55	128.25	2.79728	3.32115	59.6891	1.98236	0.118651	0.00394057
1208	A	15	H	3	93	132.13	2.89264	3.22588	68.6518	2.21462	0.118651	0.00382753
1208	A	15	H	6	93	136.63	3.00324	3.62732	69.6019	2.52468	0.181905	0.00659827
1208	A	16	H	2	93	140.13	3.10092	3.29873	69.2645	2.28485	0.0987342	0.00325697
1208	A	16	H	6	93	146.13	3.26695	2.53956	59.0364	1.49926	0.238619	0.00605987
1208	A	17	H	2	90	149.6	3.38367	3.03731	76.7333	2.33063	0.0987342	0.00299886
1208	A	17	H	5	90	154.1	3.51492	2.79182	79.4039	2.21681	0.118819	0.00331723
1208	A	17	H	6	90	155.6	3.55867	2.49286	72.1931	1.79967	0.122134	0.00304465
1208	A	18	H	2	90	159.1	3.68054	2.0451	28.844	0.589889	0.33704	0.00689281
1208	A	18	H	6	90	165.1	3.90902	2.02239	29.453	0.595655	0.307648	0.00622184
1208	A	19	H	1	29	166.49	3.96195	2.23041	67.8464	1.51325	0.1107	0.00246906
1208	A	19	H	3	30	169.5	4.07657	2.26491	59.2957	1.34299	0.146638	0.00332123
1208	A	19	H	4	97	171.67	4.1592	2.3514	59.2957	1.39428	0.146638	0.00344805
1208	A	19	H	6	63	174.33	4.24058	2.64849	67.6302	1.79118	0.148402	0.00393041
1208	A	20	H	2	25	177.45	4.33131	2.56965	60.4616	1.55365	0.268688	0.00690435
1208	A	20	H	3	95	179.65	4.40161	2.85285	75.8323	2.16338	0.097613	0.00278476
1208	A	20	H	5	29	181.99	4.47638	2.48872	73.639	1.83267	0.097613	0.00242931
1208	A	20	H	6	94	184.14	4.56925	2.21084	65.2484	1.44254	0.115541	0.00255443
1208	A	21	X	2	26	186.96	4.69697	1.54568	69.5202	1.07456	0.0914876	0.00141411
1208	A	21	X	3	95	189.15	4.79328	1.46087	60.0237	0.876868	0.104775	0.00153063
1208	A	22	X	1	95	191.35	4.90715	1.51055	30.4463	0.459907	0.264972	0.00400254
1208	A	22	X	3	40	193.8	4.98749	1.98577	57.767	1.14712	0.114731	0.00227831
1208	A	22	X	4	91	195.81	5.0658	2.30785	77.9629	1.79927	0.0680404	0.00157027
1208	A	22	X	6	23	198.13	5.1586	2.2523	71.3467	1.60694	0.0921028	0.00207443
1208	A	23	X	1	137	201.47	5.30358	1.87795	72.2644	1.35709	0.353246	0.00663381
1208	A	23	X	3	28	203.38	5.39519	1.63215	75.8993	1.23879	0.115369	0.00188301
1208	A	23	X	4	112	205.72	5.50742	1.58223	43.3007	0.685117	0.117131	0.00185327
1208	A	23	X	6	25	207.35	5.5856	1.73596	55.6994	0.966919	0.103091	0.00178962
1208	A	24	X	1	135	211.15	5.76785	1.00214	20.0496	0.200925	0.216689	0.00217154
1208	A	24	X	3	95	213.75	5.89255	1.20547	30.788	0.37114	0.232248	0.00279969
1208	A	24	X	5	37	216.17	6.00861	1.71883	69.0733	1.18725	0.0915345	0.00157332
1208	A	25	X	2	21	221.11	6.25224	1.13917	41.0241	0.467334	0.154846	0.00176397
1208	A	25	X	3	95	223.35	6.42704	1.65595	47.2157	0.781868	0.115979	0.00192056
1208	A	26	X	1	40	229.5	6.65649	1.31772	44.7091	0.589141	0.11735	0.00154634
1208	A	26	X	2	125	231.85	6.77124	1.28311	41.0424	0.526619	0.130823	0.0016786
1208	A	26	X	4	20	233.8	6.95878	1.57992	68.5075	1.08236	0.0984704	0.00155575
1208	A	26	X	5	62	235.17	7.09054	1.37878	33.7771	0.465712	0.134749	0.00185789
1208	A	27	X	1	107	239.77	7.20153	0.934584	37.2879	0.348487	0.0966249	0.000903041
1208	A	27	X	2	57	240.77	7.52129	0.547661	76.8341	0.42079	0.0661607	0.000362336
1208	A	27	X	3	5	241.75	7.63884	0.974527	78.8699	0.768608	0.063647	0.000620257
1208	A	27	X	3	115	242.85	7.69654	1.27234	36.6503	0.466316	0.118112	0.00150279
1208	A	27	X	4	97	244.17	7.76426	1.50677	55.5946	0.837683	0.100763	0.00151827
1208	A	27	X	5	88	245.58	7.83737	1.49888	52.8185	0.791686	0.0989268	0.0014828
1208	A	27	X	5	129	245.99	7.85863	1.52529	58.6882	0.895165	0.0850778	0.00129768
1208	A	28	X	1	55	248.65	7.99656	1.19347	51.2495	0.611647	0.0878198	0.00104811
1208	A	28	X	1	87	248.97	8.01315	1.32038	66.2483	0.874729	0.0796096	0.00105115
1208	A	28	X	1	135	249.45	8.03804	1.19596	41.2227	0.493007	0.128692	0.00153911
1208	A	28	X	2	20	249.8	8.05619	1.13181	48.3048	0.546719	0.110118	0.00124632
1208	A	28	X	2	64	250.24	8.079	1.22674	55.9105	0.685876	0.0808453	0.000991762
1208	A	28	X	2	129	250.89	8.12226	1.14002	48.6634	0.554772	0.0854584	0.00097424
1208	A	28	X	3	35	251.45	8.19994	0.726256	47.8621	0.347601	0.112633	0.000818001
1208	A	28	X	3	88	251.98	8.25904	0.634653	49.3143	0.312975	0.113364	0.000719469
1208	A	28	X	3	132	252.42	8.29659	0.601231	48.6427	0.292455	0.104511	0.000628351
1208	A	28	X	4	63	253.23	8.40245	0.644032	54.9565	0.353937	0.073398	0.000472707
1208	A	28	X	4	145	254.05	8.51155	0.837476	80.8686	0.677255	0.0704785	0.00059024
1208	A	28	X	5	39	254.49	8.57009	0.850868	80.2055	0.682443	0.0815969	0.000694282
1208	A	28	X	5	144	255.54	8.7098	0.880109	74.7691	0.65805	0.315707	0.00277857
1208	A	28	X	6	25	255.85	8.75104	1.00799	72.8997	0.734822	0.0950805	0.000958401
1208	A	28	X	6	83	256.43	8.80182	0.76579	49.6284	0.380049	0.10814	0.000828125
1208	A	29	X	1	144	259.24	9.00322	0.839954	49.535	0.416071	0.084399	0.000708913
1208	A	29	X	2	5	259.35	9.01111	0.795684	37.9926	0.302301	0.120646	0.000959961
1208	A	29	X	2	45	259.75	9.03978	0.981	64.2067	0.629868	0.128352	0.00125913
1208	A	29	X	2	88	260.18	9.0706	0.925579	55.0518	0.509548	0.128549	0.00118982
1208	A	29	X	3	5	260.85	9.12593	1.1982	82.6076	0.989804	0.0919563	0.00110182
1208	A	29	X	4	25	262.55	9.31254	0.807799	67.3432	0.543998	0.0817793	0.000660612
1208	A	29	X	4	113	263.43	9.38046	0.917029	77.7141	0.712661	0.0827852	0.000759164
1208	A	29	X	5	36	264.16	9.44453	0.932104	68.7567	0.640884	0.089107	0.00083057
1208	A	30	X	3	40	270.8	9.88037	1.0938	67.7124	0.740638	0.102962	0.0011262
1208	A	31	X	3	5	280.05	10.8322	0.829536	50.6075	0.419807	0.0884798	0.000733972
1208	A	33	X	3	53	299.43	12.431	0.66671	77.7379	0.518286	0.0880441	0.000586999
