# Supplementary material for: Variations in the Biological Pump through the Miocene: Evidence from organic carbon burial in Pacific Ocean sediments
Source: Copernicus journal article supplement (doi:10.5194/cp-2024-34), 2024-05-27
Supplement: Supplementary file 3 [file SuppTable_S11_U1337S_agedepth_MAR_20Ma_Data.xlsx]

## Sheet: U1337S_MAR_20Ma_Data
U1337 Age (Ma)	U1337S splice depth (m CCSF)	Bulk MAR (g/cm2/kyr)	CaCO3 (wt %)	CaCO3 MAR (g/cm2/kyr)	Normative Opal (wt %)	Opal MAR (g/cm2/kyr)	BaSO4 (wt %)	BaSO4 MAR (g/cm2/kyr)
0	0	2.24861	65.8246	1.48014	9.14677	0.205675	1.36869	0.0307766
0.01	0.175634	1.93207	73.0237	1.41087	8.82531	0.170511	0.935554	0.0180756
0.02	0.286355	1.60922	77.0033	1.23916	7.87145	0.126669	0.813301	0.0130878
0.03	0.416624	1.9249	81.7667	1.57392	6.97085	0.134182	0.626365	0.0120569
0.04	0.563265	2.52473	83.2048	2.10069	6.05648	0.15291	0.656821	0.0165829
0.05	0.771675	2.98424	80.1139	2.39079	6.5014	0.194018	0.791066	0.0236073
0.06	0.997508	2.78056	50.9758	1.41741	2.23351	0.062104	3.02424	0.0840909
0.07	1.23735	2.3837	45.6052	1.08709	6.69002	0.15947	2.49741	0.0595307
0.08	1.40553	1.88569	38.5648	0.727212	2.73595	0.0515915	3.23416	0.0609861
0.09	1.55903	1.3178	36.0599	0.475198	2.95532	0.0389452	3.94233	0.0519521
0.1	1.62902	0.762991	36.9254	0.281738	2.40175	0.0183251	3.85017	0.0293764
0.11	1.69031	0.689637	34.8793	0.240541	7.39852	0.051023	2.68173	0.0184942
0.12	1.74848	0.677128	46.5509	0.315209	9.09716	0.0615995	1.93695	0.0131156
0.13	1.80524	0.876368	61.6675	0.540434	9.32164	0.0816918	1.33172	0.0116708
0.14	1.88865	1.83549	73.1187	1.34209	8.68744	0.159457	0.889075	0.0163189
0.15	2.0866	2.92183	76.7211	2.24166	5.59605	0.163507	1.19354	0.0348732
0.16	2.33327	2.76741	64.3569	1.78102	9.13933	0.252923	1.29581	0.0358603
0.17	2.53575	2.67505	63.5026	1.69873	6.67552	0.178574	1.69558	0.0453576
0.18	2.77855	2.49596	27.1491	0.677632	2.6241	0.0654965	3.66592	0.0915
0.19	2.97403	1.88713	19.5139	0.368253	4.08299	0.0770512	3.38904	0.0639554
0.2	3.10976	1.75736	22.6227	0.397561	4.91396	0.0863558	2.85458	0.050165
0.21	3.28121	1.68629	30.4693	0.5138	9.06571	0.152874	2.07676	0.03502
0.22	3.40137	1.23781	38.7481	0.479627	8.88613	0.109993	1.81752	0.0224974
0.23	3.49163	1.27643	43.2118	0.551567	9.9692	0.127249	1.53554	0.0196
0.24	3.61531	1.65505	55.0292	0.910763	10.8494	0.179563	1.01297	0.0167651
0.25	3.76488	2.62475	64.7579	1.69974	8.88555	0.233224	0.922078	0.0242023
0.26	4.01903	2.83408	33.3944	0.946425	9.8435	0.278973	1.76251	0.049951
0.27	4.25445	1.90288	26.725	0.508544	8.9446	0.170205	1.9372	0.0368626
0.28	4.35428	1.1938	36.8362	0.43975	8.90073	0.106257	1.81589	0.021678
0.29	4.45687	1.22881	40.3948	0.496375	9.43893	0.115987	1.73013	0.0212601
0.3	4.55954	1.23847	41.5304	0.514341	10.2929	0.127475	1.58345	0.0196106
0.31	4.66388	1.34294	40.0873	0.538351	10.6036	0.142401	1.53928	0.0206716
0.32	4.78101	1.49545	39.6372	0.592754	10.3239	0.154388	1.52657	0.022829
0.33	4.91479	1.69368	56.6846	0.960056	8.38635	0.142038	1.14573	0.0194051
0.34	5.0515	1.88876	64.5549	1.21928	7.70692	0.145565	0.980154	0.0185127
0.35	5.19565	1.72628	47.3297	0.817042	8.56301	0.147821	1.45028	0.0250358
0.36	5.33377	1.64602	40.7806	0.671255	9.0505	0.148973	1.6105	0.0265091
0.37	5.46951	1.58683	33.7831	0.536082	8.88553	0.140999	1.77298	0.0281342
0.38	5.59882	1.54979	30.2487	0.468792	8.62084	0.133605	1.93482	0.0299857
0.39	5.72834	1.46254	24.5099	0.358468	8.75304	0.128017	2.02533	0.0296213
0.4	5.84895	1.36842	34.0196	0.465532	8.70617	0.119137	1.71973	0.0235332
0.41	5.96162	1.49349	60.7563	0.907391	7.66314	0.114448	1.04644	0.0156285
0.42	6.07482	1.46036	76.8171	1.12181	6.82315	0.0996429	0.626225	0.00914517
0.43	6.16669	1.52183	77.4892	1.17926	6.80151	0.103508	0.615742	0.00937058
0.44	6.28887	1.73623	74.1062	1.28665	7.06659	0.122692	0.7099	0.0123255
0.45	6.41786	1.49126	67.4691	1.00614	7.98327	0.119051	0.876095	0.0130648
0.46	6.51274	1.47963	59.4988	0.880361	8.86852	0.131221	1.09975	0.0162723
0.47	6.6483	1.95624	43.3605	0.848233	9.35554	0.183016	1.50378	0.0294174
0.48	6.84065	2.1944	26.7617	0.587258	10.0479	0.22049	1.79445	0.0393773
0.49	7.02225	2.25305	51.3729	1.15746	10.3525	0.233248	1.1904	0.0268202
0.5	7.19286	1.85759	70.3759	1.30729	8.9722	0.166667	0.690845	0.0128331
0.51	7.2829	1.11113	75.1266	0.834758	7.74671	0.0860764	0.609346	0.00677066
0.52	7.35321	0.976822	72.6369	0.709533	7.91414	0.077307	0.679793	0.00664036
0.53	7.42285	0.952727	64.9199	0.61851	8.94129	0.0851861	0.876286	0.00834861
0.54	7.495	0.915958	54.3619	0.497932	10.2667	0.0940387	1.14034	0.010445
0.55	7.56541	0.80819	44.8763	0.362686	11.0741	0.0894997	1.35915	0.0109845
0.56	7.62425	0.70037	41.0594	0.287567	11.2877	0.0790556	1.44009	0.010086
0.57	7.67952	0.672691	39.6589	0.266782	11.3475	0.0763335	1.46683	0.00986726
0.58	7.73479	0.666247	38.2584	0.254895	11.4073	0.0760005	1.49357	0.00995089
0.59	7.79032	0.737866	37.5598	0.277141	11.5344	0.0851088	1.49177	0.0110073
0.6	7.85893	0.844966	41.2703	0.34872	11.6628	0.0985468	1.38955	0.0117412
0.61	7.92606	0.840084	45.8237	0.384957	11.7714	0.0988893	1.27627	0.0107218
0.62	7.99339	1.09397	49.7579	0.544337	11.8141	0.129243	1.18516	0.0129653
0.63	8.09983	1.84758	60.7161	1.12178	10.3086	0.190461	0.960515	0.0177463
0.64	8.28657	2.79548	74.8968	2.09372	7.38399	0.206418	0.653738	0.0182751
0.65	8.48916	2.8567	86.9377	2.48355	4.44523	0.126987	0.383018	0.0109417
0.66	8.6652	2.38148	82.7607	1.97093	5.61971	0.133832	0.510085	0.0121476
0.67	8.81262	2.02784	73.5861	1.49221	7.4454	0.150981	0.767649	0.0155667
0.68	8.96	1.91008	60.2219	1.15029	9.42102	0.179949	1.12339	0.0214576
0.69	9.11418	1.8513	47.1047	0.872049	11.0986	0.205468	1.42181	0.0263219
0.7	9.26916	1.53386	49.155	0.753966	11.2563	0.172656	1.27677	0.0195839
0.71	9.36925	1.31781	64.2876	0.847186	9.3221	0.122847	0.904143	0.0119149
0.72	9.47056	1.3897	76.102	1.05759	7.71832	0.107262	0.61615	0.00856264
0.73	9.57001	1.76101	79.4145	1.3985	6.94907	0.122374	0.555522	0.0097828
0.74	9.7281	2.36816	82.5152	1.95409	6.07108	0.143773	0.427698	0.0101286
0.75	9.89412	2.85	78.3224	2.23219	6.98627	0.199109	0.500385	0.014261
0.76	10.1272	2.77538	57.4916	1.59561	11.1841	0.3104	0.933711	0.025914
0.77	10.3312	2.12918	47.7873	1.01748	11.2745	0.240054	1.19459	0.025435
0.78	10.4753	1.81746	61.1596	1.11155	10.029	0.182273	0.89468	0.0162604
0.79	10.6109	1.87791	64.4081	1.20953	9.8195	0.184401	0.822948	0.0154542
0.8	10.755	1.79938	55.9686	1.00709	10.8257	0.194796	1.0478	0.0188539
0.81	10.8932	1.589	40.8948	0.649816	12.8859	0.204756	1.30525	0.0207404
0.82	11.0185	1.32296	34.5152	0.456623	14.7366	0.194959	1.33131	0.0176128
0.83	11.1174	1.02475	32.2083	0.330055	15.4487	0.158311	1.34057	0.0137376
0.84	11.1935	1.26479	28.9913	0.366679	15.4652	0.195603	1.35023	0.0170776
0.85	11.3362	1.84365	26.24	0.483774	15.657	0.288661	1.30021	0.0239713
0.86	11.5142	2.26908	39.1595	0.888559	12.7576	0.28948	1.20268	0.0272898
0.87	11.7154	2.2408	64.4773	1.44481	9.87735	0.221332	0.779241	0.0174612
0.88	11.8445	1.71115	69.478	1.18887	9.05546	0.154952	0.727854	0.0124547
0.89	11.9723	1.7297	74.3617	1.28624	7.96451	0.137762	0.695275	0.0120262
0.9	12.1	1.78651	77.4023	1.3828	7.34298	0.131183	0.652513	0.0116572
0.91	12.2277	1.90349	74.2336	1.41303	8.19862	0.15606	0.663477	0.0126292
0.92	12.3799	2.11486	68.958	1.45837	8.92412	0.188733	0.781997	0.0165382
0.93	12.5459	2.03751	57.041	1.16222	10.5853	0.215677	1.12316	0.0228844
0.94	12.7033	3.19938	31.7661	1.01632	12.3784	0.396033	1.80376	0.0577092
0.95	13.086	5.13104	18.7732	0.96326	12.8468	0.659172	2.03708	0.104523
0.96	13.5832	5.22783	36.2642	1.89583	13.569	0.709362	1.54423	0.0807297
0.97	13.9626	2.77558	49.799	1.38221	11.5719	0.321187	1.20806	0.0335307
0.98	14.0366	0.919779	57.4934	0.528812	10.1485	0.0933442	1.11442	0.0102502
0.99	14.1079	1.02281	58.0037	0.593267	9.87632	0.101016	1.14624	0.0117239
1	14.198	1.2048	51.6372	0.622124	10.5412	0.127	1.31644	0.0158604
1.01	14.305	1.29201	49.6008	0.640846	10.7178	0.138475	1.37589	0.0177766
1.02	14.408	1.31767	58.5522	0.771528	9.92046	0.130719	1.15106	0.0151672
1.03	14.5109	1.36745	61.7463	0.844353	9.59333	0.131184	1.07075	0.014642
1.04	14.6175	1.33291	54.1	0.721105	10.7859	0.143767	1.23915	0.0165167
1.05	14.7255	1.29211	44.3437	0.572968	11.924	0.15407	1.45707	0.0188269
1.06	14.8329	1.25079	40.1728	0.50248	11.9708	0.14973	1.55659	0.0194698
1.07	14.9356	1.26518	49.5845	0.627335	10.728	0.135728	1.32457	0.0167582
1.08	15.0405	1.4005	63.3134	0.886703	10.0048	0.140116	0.96585	0.0135267
1.09	15.1457	1.39847	66.6154	0.931594	11.2608	0.157479	0.78639	0.0109974
1.1	15.2509	1.46414	68.3203	1.0003	10.4201	0.152564	0.698204	0.0102226
1.11	15.3561	1.63688	64.3043	1.05258	9.44842	0.154659	0.823646	0.0134821
1.12	15.4921	3.11744	54.1826	1.68911	10.7317	0.334555	1.04972	0.0327244
1.13	15.8476	3.63349	34.5232	1.2544	13.0731	0.475011	1.36306	0.0495265
1.14	16.1024	1.79311	28.1089	0.504023	13.7098	0.245832	1.43893	0.0258016
1.15	16.1565	0.611205	32.1913	0.196755	13.4604	0.0822708	1.38001	0.00843467
1.16	16.2055	0.620062	37.6772	0.233622	12.9144	0.0800773	1.31477	0.0081524
1.17	16.2606	1.04202	45.625	0.47542	12.0526	0.125589	1.19605	0.0124631
1.18	16.3732	2.17543	61.9226	1.34708	10.2349	0.222652	0.8485	0.0184585
1.19	16.5782	2.52215	57.4498	1.44897	11.0874	0.279642	1.00961	0.0254638
1.2	16.7702	2.14399	35.4125	0.759242	12.7822	0.274049	1.59372	0.0341693
1.21	16.9401	1.63168	22.1235	0.360985	16.0146	0.261307	1.60898	0.0262535
1.22	17.0496	1.44226	23.0715	0.332751	17.3692	0.250509	1.41901	0.0204658
1.23	17.189	1.783	34.2387	0.610475	16.1935	0.28873	1.25523	0.0223808
1.24	17.3493	2.01622	49.6619	1.0013	13.5124	0.272441	1.10249	0.0222287
1.25	17.5124	2.11673	58.7725	1.24406	11.6584	0.246777	0.967267	0.0204745
1.26	17.681	2.17489	49.4159	1.07474	12.862	0.279734	1.11237	0.0241929
1.27	17.8699	2.32891	49.9231	1.16266	13.3281	0.3104	1.00284	0.0233552
1.28	18.059	2.39203	57.3044	1.37074	12.3622	0.295707	0.863237	0.0206489
1.29	18.2371	2.12788	62.6659	1.33345	11.8183	0.251479	0.773199	0.0164527
1.3	18.3791	1.68599	53.3667	0.899756	13.912	0.234555	0.930036	0.0156803
1.31	18.5063	1.49549	46.7804	0.699595	15.8373	0.236845	0.997447	0.0149167
1.32	18.6247	2.32472	48.9944	1.13898	15.7272	0.365614	0.924215	0.0214854
1.33	18.881	3.70621	62.3727	2.31166	12.2332	0.45339	0.84202	0.031207
1.34	19.1964	4.18734	48.3258	2.02357	15.5537	0.651287	1.03816	0.0434714
1.35	19.5748	3.47164	17.4481	0.605735	14.9711	0.519744	1.84069	0.0639023
1.36	19.8182	2.32032	38.4378	0.891882	13.3192	0.309049	1.4671	0.0340416
1.37	19.98	1.59938	41.5236	0.664121	13.9331	0.222843	1.26063	0.0201622
1.38	20.093	1.26917	35.2396	0.447251	13.024	0.165296	1.44819	0.01838
1.39	20.2032	1.33005	33.7144	0.448419	13.2478	0.176203	1.49557	0.0198918
1.4	20.3286	1.92461	47.5505	0.91516	11.45	0.220367	1.28453	0.0247221
1.41	20.5262	2.10924	41.8637	0.883007	8.91777	0.188098	1.69044	0.0356555
1.42	20.6871	1.90718	33.9581	0.647641	8.83556	0.16851	1.90276	0.0362891
1.43	20.8509	1.86374	27.1027	0.505124	9.92524	0.184981	1.87325	0.0349125
1.44	21.01	1.67517	22.4066	0.375349	9.38377	0.157194	1.97545	0.0330922
1.45	21.1419	1.48311	13.3857	0.198525	9.28766	0.137746	2.10331	0.0311945
1.46	21.2701	1.40898	14.6138	0.205906	10.4532	0.147283	1.99986	0.0281777
1.47	21.3897	1.37854	21.0811	0.290611	9.79555	0.135035	2.00086	0.0275826
1.48	21.5104	1.59097	31.5767	0.502376	9.71235	0.15452	1.83432	0.0291834
1.49	21.6596	1.85641	33.6219	0.62416	13.6714	0.253797	1.59096	0.0295347
1.5	21.8259	2.09042	41.7305	0.872341	13.568	0.283627	1.37091	0.0286578
1.51	22.0088	2.31892	59.9979	1.3913	11.8783	0.275448	0.894967	0.0207535
1.52	22.1934	2.56361	53.583	1.37366	13.9194	0.356839	0.918383	0.0235438
1.53	22.4139	2.73912	35.697	0.977782	16.8928	0.462715	1.09929	0.0301108
1.54	22.6493	2.88356	35.6346	1.02755	16.2227	0.46779	1.26789	0.0365604
1.55	22.894	2.90929	28.6363	0.833114	15.8879	0.462227	1.47697	0.0429694
1.56	23.1397	3.28704	47.7328	1.56899	13.0255	0.428152	1.13378	0.0372678
1.57	23.426	3.17753	41.0429	1.30415	13.452	0.427441	1.36249	0.0432935
1.58	23.6688	2.47628	22.958	0.568505	15.3242	0.379469	1.57831	0.0390832
1.59	23.8512	1.97115	21.4179	0.422178	15.2323	0.300251	1.58445	0.0312318
1.6	24.0122	1.85605	24.1522	0.448276	14.7446	0.273666	1.58761	0.0294667
1.61	24.1733	1.89856	26.5191	0.503482	14.8065	0.28111	1.60211	0.0304171
1.62	24.3344	1.75486	42.2912	0.742153	13.2662	0.232804	1.24422	0.0218344
1.63	24.4647	2.07077	67.5366	1.39853	9.95354	0.206115	0.679854	0.0140782
1.64	24.6436	2.30164	68.0174	1.56551	10.7362	0.247108	0.648249	0.0149204
1.65	24.8113	2.0051	55.7456	1.11776	13.2371	0.265417	0.848643	0.0170162
1.66	24.9587	1.81389	58.0144	1.05232	12.7878	0.231957	0.858865	0.0155789
1.67	25.0925	1.7696	61.7288	1.09235	11.3809	0.201396	0.8367	0.0148062
1.68	25.2296	1.79601	54.3264	0.975707	11.2688	0.202389	1.10849	0.0199087
1.69	25.3707	1.70972	37.9202	0.648327	12.0609	0.206208	1.64057	0.028049
1.7	25.5119	1.65665	29.8815	0.495032	11.9071	0.197259	1.90082	0.03149
1.71	25.6499	1.59673	26.9086	0.429657	12.3213	0.196737	1.87899	0.0300024
1.72	25.7845	1.58839	26.1195	0.414879	11.7689	0.186936	1.90213	0.0302132
1.73	25.9198	1.63217	31.8702	0.520178	12.9527	0.21141	1.5988	0.0260952
1.74	26.057	1.6418	29.8059	0.489353	13.0624	0.214459	1.78215	0.0292594
1.75	26.1923	1.55476	25.8513	0.401926	12.4773	0.193993	1.92288	0.0298962
1.76	26.3184	1.62506	37.6768	0.612273	12.4111	0.201687	1.47476	0.0239659
1.77	26.4584	1.90128	48.8663	0.929083	12.077	0.229618	1.24647	0.0236989
1.78	26.6203	1.76835	45.8462	0.81072	12.969	0.229338	1.33475	0.0236031
1.79	26.7408	1.33714	35.2098	0.470805	14.5894	0.195081	1.49639	0.0200088
1.8	26.8407	1.17559	26.0857	0.30666	15.5166	0.182411	1.65124	0.0194118
1.81	26.9372	1.22078	20.8328	0.254323	15.8003	0.192887	1.75816	0.0214632
1.82	27.0466	1.26925	22.2073	0.281866	15.3659	0.195032	1.75288	0.0222484
1.83	27.153	1.22129	24.2095	0.295669	14.6865	0.179365	1.77805	0.0217152
1.84	27.2523	1.33726	23.4726	0.313891	13.9839	0.187002	1.85069	0.0247486
1.85	27.379	1.57298	21.7276	0.34177	13.3201	0.209522	1.94802	0.030642
1.86	27.5155	1.60773	18.7131	0.300856	13.9428	0.224162	1.91524	0.0307919
1.87	27.6522	1.69169	20.1361	0.340641	14.9379	0.252703	1.7233	0.0291529
1.88	27.8028	1.8542	24.2697	0.450009	15.1639	0.281169	1.5907	0.0294948
1.89	27.962	1.90712	27.4246	0.523021	15.7684	0.300723	1.40748	0.0268424
1.9	28.1212	1.9348	26.8932	0.520331	16.1385	0.312247	1.45731	0.0281959
1.91	28.2821	2.07364	19.9326	0.413329	17.851	0.370166	1.60825	0.0333494
1.92	28.4718	1.68393	19.4895	0.328189	15.6737	0.263934	1.72558	0.0290576
1.93	28.5674	1.17899	21.9174	0.258405	10.4824	0.123586	2.28659	0.0269587
1.94	28.6805	1.11388	22.8487	0.254508	7.02467	0.0782465	2.80014	0.0311903
1.95	28.7629	1.04433	23.0555	0.240775	7.12163	0.0743734	2.70654	0.0282652
1.96	28.8653	1.20328	25.7127	0.309397	9.9218	0.119387	2.37783	0.0286121
1.97	28.9741	1.36058	33.8973	0.461199	8.31627	0.11315	2.78773	0.0379293
1.98	29.1076	1.88704	39.2002	0.739723	5.74977	0.1085	2.66539	0.0502969
1.99	29.2965	2.18481	35.0505	0.765786	8.64803	0.188943	2.09066	0.0456769
2	29.4842	2.09406	35.7722	0.749092	11.0515	0.231425	1.7795	0.0372638
2.01	29.6592	2.21326	37.5033	0.830045	11.9969	0.265523	1.64784	0.036471
2.02	29.8677	2.48056	47.4564	1.17719	11.9639	0.296771	1.40264	0.0347934
2.03	30.0764	2.56522	48.2119	1.23674	13.0969	0.335964	1.33114	0.0341466
2.04	30.2857	2.21362	37.1257	0.821823	12.4178	0.274884	1.62259	0.035918
2.05	30.4524	1.87	30.5261	0.570838	12.3118	0.23023	1.67575	0.0313365
2.06	30.6188	2.30793	27.78	0.641143	11.9291	0.275316	1.82296	0.0420726
2.07	30.86	2.71238	26.6338	0.722409	13.1271	0.356057	1.87652	0.0508984
2.08	31.0935	2.67777	26.1241	0.699544	12.5608	0.336348	2.04709	0.0548163
2.09	31.3282	2.51835	42.4018	1.06782	12.678	0.319276	1.5263	0.0384375
2.1	31.5188	1.70807	38.8446	0.663492	13.1773	0.225077	1.64141	0.0280364
2.11	31.6295	1.25692	38.655	0.485861	13.23	0.16629	1.63277	0.0205226
2.12	31.7391	1.28204	44.8821	0.575404	12.9774	0.166375	1.4854	0.0190433
2.13	31.8487	1.31837	47.0168	0.619856	12.4739	0.164453	1.5701	0.0206997
2.14	31.9629	1.32272	46.9041	0.620412	12.581	0.166412	1.51615	0.0200545
2.15	32.0733	1.19056	46.2682	0.55085	12.9257	0.153888	1.43485	0.0170827
2.16	32.1606	1.02643	45.2662	0.464625	13.3153	0.136672	1.42746	0.0146518
2.17	32.2391	0.946498	44.2377	0.418709	13.5897	0.128626	1.43621	0.0135937
2.18	32.3148	0.933768	42.5081	0.396927	13.976	0.130504	1.44875	0.013528
2.19	32.3906	0.939695	40.3351	0.379027	14.7252	0.138372	1.44914	0.0136174
2.2	32.4681	1.35165	37.6283	0.508604	15.6164	0.211079	1.46255	0.0197686
2.21	32.6116	2.50606	31.3038	0.784491	15.9658	0.400111	1.57444	0.0394564
2.22	32.8869	3.19484	31.4437	1.00458	15.1432	0.483799	1.69262	0.0540765
2.23	33.1453	2.92152	26.5399	0.775366	17.6897	0.516807	1.57048	0.0458819
2.24	33.3762	2.26752	34.0252	0.771527	16.6957	0.378577	1.31629	0.0298472
2.25	33.5212	1.64702	32.1	0.528694	16.2868	0.268247	1.51622	0.0249726
2.26	33.6462	1.27474	26.3124	0.335416	17.4328	0.222223	1.6112	0.0205386
2.27	33.7346	0.948713	23.9956	0.22765	18.1427	0.172122	1.59496	0.0151316
2.28	33.8064	0.999754	23.5723	0.235665	18.8876	0.188829	1.51527	0.015149
2.29	33.9058	1.18807	25.1735	0.29908	18.9144	0.224716	1.47408	0.0175131
2.3	34.0094	1.22899	24.2683	0.298255	19.174	0.235646	1.57156	0.0193144
2.31	34.1129	1.26389	22.616	0.285842	20.8255	0.263212	1.53363	0.0193834
2.32	34.2235	1.53036	23.2545	0.355878	22.0877	0.338021	1.33487	0.0204283
2.33	34.3738	1.41489	27.6489	0.391201	21.1542	0.299309	1.19278	0.0168765
2.34	34.4624	0.892835	28.5489	0.254895	20.0635	0.179134	1.26566	0.0113003
2.35	34.5237	0.934577	28.7684	0.268863	19.1686	0.179145	1.33496	0.0124762
2.36	34.6199	1.1499	30.498	0.350696	17.8774	0.205572	1.4077	0.0161872
2.37	34.717	1.21202	36.054	0.436982	16.908	0.204929	1.37166	0.0166248
2.38	34.8218	1.29237	43.8302	0.566447	15.8896	0.205352	1.22219	0.0157951
2.39	34.9265	1.32982	52.521	0.698434	14.264	0.189685	1.02227	0.0135944
2.4	35.0316	1.51708	61.3811	0.931198	12.1811	0.184796	0.824215	0.012504
2.41	35.158	1.78203	66.0518	1.17707	11.0429	0.196788	0.740519	0.0131963
2.42	35.2939	2.17456	63.7582	1.38646	11.2973	0.245667	0.917179	0.0199446
2.43	35.4922	2.34405	50.4053	1.18152	12.2429	0.286979	1.47072	0.0344745
2.44	35.6789	1.80475	54.7005	0.98721	11.8327	0.213551	1.2984	0.023433
2.45	35.7862	1.14152	59.937	0.68419	11.2248	0.128132	1.10715	0.0126382
2.46	35.8528	0.871251	62.8337	0.547439	10.6462	0.0927551	1.0144	0.00883794
2.47	35.9184	0.879878	60.8324	0.535251	10.7383	0.0944843	1.10177	0.00969425
2.48	35.9898	0.974177	56.8437	0.553758	11.2761	0.109849	1.262	0.0122941
2.49	36.0708	1.0201	55.204	0.563135	11.5817	0.118145	1.3289	0.013556
2.5	36.1494	1.07076	56.7371	0.60752	11.4563	0.12267	1.26557	0.0135513
2.51	36.2392	1.19017	59.958	0.7136	10.992	0.130823	1.1792	0.0140344
2.52	36.3334	1.44002	63.2854	0.911322	10.1778	0.146563	1.12188	0.0161553
2.53	36.4598	3.98463	61.681	2.45776	9.90958	0.39486	1.20202	0.0478962
2.54	36.9525	4.21234	15.7214	0.662238	15.0799	0.635215	2.02261	0.0851991
2.55	37.1756	2.17841	18.0034	0.392189	16.4357	0.358037	1.82352	0.0397237
2.56	37.3259	1.66282	20.7284	0.344675	17.0265	0.28312	1.67458	0.0278452
2.57	37.4552	1.53365	24.5066	0.375845	16.2558	0.249306	1.67643	0.0257106
2.58	37.5831	1.5891	27.8171	0.44204	16.6224	0.264145	1.59169	0.0252935
2.59	37.7184	1.91412	26.0191	0.498036	17.4533	0.334076	1.60235	0.0306709
2.6	37.9032	2.18852	37.5026	0.820752	15.5912	0.341217	1.46442	0.0320491
2.61	38.0758	2.0617	40.899	0.843214	15.6249	0.322137	1.3046	0.0268969
2.62	38.2404	2.0347	42.6346	0.867484	16.0924	0.327431	1.11564	0.0226998
2.63	38.4049	1.97053	38.7961	0.764489	16.539	0.325905	1.21728	0.0239869
2.64	38.5621	1.96746	39.7156	0.781387	16.7669	0.329881	1.21688	0.0239415
2.65	38.7313	2.48528	41.8069	1.03902	17.1628	0.426543	1.10656	0.0275012
2.66	38.9647	2.22865	29.7661	0.663382	20.3239	0.452948	1.13633	0.0253248
2.67	39.1056	1.68717	36.2486	0.611574	18.9447	0.319629	1.17299	0.0197903
2.68	39.2421	1.66861	42.0443	0.701557	17.706	0.295444	1.07557	0.0179471
2.69	39.3787	1.91514	48.1747	0.922612	15.9014	0.304533	0.996058	0.0190759
2.7	39.5427	2.44589	48.619	1.18917	15.2517	0.373038	1.06163	0.0259663
2.71	39.7756	3.48796	54.9715	1.91739	15.0321	0.524314	0.898659	0.0313449
2.72	40.0862	3.30947	37.8822	1.2537	21.2303	0.702611	1.10171	0.0364609
2.73	40.313	2.52771	34.9358	0.883073	22.0036	0.556186	1.02197	0.0258324
2.74	40.4979	2.2823	35.7022	0.814829	20.4209	0.466066	1.02236	0.0233333
2.75	40.6826	2.29377	38.3666	0.880043	18.6968	0.428862	1.0015	0.0229721
2.76	40.8674	2.47932	40.5932	1.00644	17.6321	0.437156	0.976206	0.0242033
2.77	41.0786	2.61503	38.5831	1.00896	17.2054	0.449928	1.07714	0.0281677
2.78	41.2922	2.60461	40.8741	1.06461	17.2748	0.449941	1.0308	0.0268482
2.79	41.4981	2.42474	51.6024	1.25122	15.3162	0.371378	0.914408	0.022172
2.8	41.669	2.16994	45.5274	0.987916	17.2022	0.373276	0.974493	0.0211459
2.81	41.8452	2.21373	38.1868	0.845353	17.646	0.390636	1.11861	0.024763
2.82	42.0309	2.01547	45.8255	0.923599	15.9293	0.321051	0.979032	0.0197321
2.83	42.1621	1.49246	45.6868	0.681858	16.1031	0.240333	0.949133	0.0141655
2.84	42.2685	1.31159	41.2252	0.540706	17.5102	0.229662	0.996399	0.0130687
2.85	42.3749	1.31402	36.8751	0.484548	18.5969	0.244368	1.06772	0.0140301
2.86	42.4813	1.30458	34.5798	0.451122	18.7248	0.244281	1.12168	0.0146333
2.87	42.5877	1.32588	32.4019	0.42961	18.8477	0.249898	1.14818	0.0152234
2.88	42.6947	1.44254	30.5256	0.440346	19.0994	0.275517	1.13308	0.0163451
2.89	42.8251	1.41609	35.9796	0.509503	18.0875	0.256135	1.10809	0.0156915
2.9	42.9252	1.24416	40.5091	0.503997	16.7012	0.20779	1.17512	0.0146204
2.91	43.0231	1.27371	40.8725	0.520597	16.1155	0.205264	1.22416	0.0155922
2.92	43.1276	1.55342	36.0826	0.560513	16.2295	0.252111	1.30888	0.0203324
2.93	43.2709	1.67177	27.3038	0.456457	18.0766	0.302198	1.42915	0.023892
2.94	43.4053	1.63264	31.252	0.510232	18.3552	0.299674	1.33091	0.021729
2.95	43.5396	1.81418	35.8608	0.650579	18.1157	0.328652	1.17552	0.0213259
2.96	43.696	1.96655	31.5737	0.620912	17.4629	0.343417	1.32677	0.0260916
2.97	43.8579	1.89511	28.1755	0.533956	17.384	0.329445	1.46765	0.0278135
2.98	44.0056	1.81495	33.1979	0.602525	17.2207	0.312546	1.34812	0.0244676
2.99	44.1522	1.82325	35.8282	0.653237	17.5334	0.319679	1.2696	0.023148
3	44.3046	2.30758	41.2276	0.95136	17.0511	0.393467	1.21236	0.0279763
3.01	44.5272	2.55504	28.4524	0.726968	19.1228	0.488594	1.36938	0.0349882
3.02	44.7268	2.35877	24.2212	0.571322	19.0792	0.450034	1.47713	0.0348421
3.03	44.9244	2.38088	25.2783	0.601846	17.4661	0.415848	1.61149	0.0383676
3.04	45.1226	2.20159	22.6313	0.498247	18.2678	0.402182	1.62031	0.0356725
3.05	45.2967	2.04771	16.6866	0.341692	15.8632	0.324832	2.08424	0.0426792
3.06	45.4677	2.09686	15.2488	0.319745	16.5502	0.347034	2.01026	0.0421523
3.07	45.654	2.28519	14.4559	0.330344	17.2234	0.393586	1.81969	0.0415834
3.08	45.858	2.19982	21.2711	0.467926	15.4852	0.340648	1.83093	0.0402771
3.09	46.0264	2.01651	23.6611	0.477127	14.0168	0.28265	1.85307	0.0373673
3.1	46.1963	2.12355	33.5076	0.711549	15.3713	0.326417	1.47186	0.0312556
3.11	46.3791	2.20098	32.6093	0.717723	16.8235	0.370282	1.41938	0.0312403
3.12	46.565	2.2995	39.5915	0.910406	15.3505	0.352984	1.35218	0.0310933
3.13	46.7558	2.36786	31.8025	0.753038	15.459	0.366048	1.46537	0.034698
3.14	46.959	2.53636	13.0687	0.331471	16.4675	0.417676	1.89572	0.0480824
3.15	47.1885	2.70666	18.9019	0.511611	17.5737	0.475661	1.64107	0.0444182
3.16	47.418	2.69373	14.8072	0.398867	17.2554	0.464815	1.70785	0.0460049
3.17	47.6475	2.46388	12.8232	0.315949	17.0089	0.41908	1.74115	0.0428999
3.18	47.8389	1.9418	11.5999	0.225247	18.9153	0.367298	1.63137	0.031678
3.19	47.9785	1.61373	12.4857	0.201485	20.0632	0.323766	1.49087	0.0240586
3.2	48.1135	1.62046	13.7128	0.222211	20.0641	0.325131	1.51208	0.0245027
3.21	48.2518	1.77687	15.7884	0.28054	19.6007	0.348279	1.55867	0.0276955
3.22	48.4139	1.91417	17.8853	0.342355	19.2477	0.368434	1.45648	0.0278795
3.23	48.5751	1.9105	19.9601	0.381339	18.6959	0.357186	1.46433	0.0279761
3.24	48.7342	1.79047	25.1138	0.449655	17.9438	0.321279	1.42295	0.0254775
3.25	48.8682	1.57466	27.6876	0.435986	18.2299	0.287059	1.41538	0.0222875
3.26	48.9927	1.55258	31.8364	0.494285	18.0617	0.280422	1.35979	0.0211118
3.27	49.1171	1.96547	37.4719	0.736497	18.1296	0.356332	1.28589	0.0252738
3.28	49.3023	3.03375	30.3785	0.921606	21.4157	0.649698	1.2521	0.0379856
3.29	49.6083	3.53879	29.9289	1.05912	20.8896	0.739239	1.24568	0.0440819
3.3	49.8872	3.28641	12.6459	0.415596	24.47	0.804184	1.3127	0.0431406
3.31	50.1591	3.11368	11.4013	0.354998	21.9217	0.682571	1.6427	0.0511483
3.32	50.4205	2.84665	25.6674	0.730662	15.9084	0.452857	1.76524	0.0502503
3.33	50.6436	2.65046	30.6235	0.811662	16.614	0.440347	1.61492	0.0428029
3.34	50.8663	2.68327	30.2119	0.810664	18.6244	0.499742	1.34628	0.0361242
3.35	51.0889	3.15181	16.9084	0.53292	24.2402	0.764004	1.2679	0.0399619
3.36	51.4057	2.65992	29.5253	0.785348	16.0198	0.426113	1.7075	0.0454182
3.37	51.5534	2.18685	39.798	0.87032	12.8466	0.280936	1.62432	0.0355214
3.38	51.7779	2.86169	37.8344	1.0827	15.2024	0.435045	1.49631	0.0428198
3.39	52.046	2.9218	42.0242	1.22786	17.2554	0.504168	1.12638	0.0329105
3.4	52.273	2.28616	47.0571	1.0758	14.7433	0.337055	1.12201	0.025651
3.41	52.418	1.73719	41.5686	0.722127	15.6092	0.271162	1.24058	0.0215512
3.42	52.5624	1.74222	42.1328	0.734047	15.5675	0.27122	1.24278	0.021652
3.43	52.7068	1.69312	35.9451	0.608594	15.398	0.260706	1.40548	0.0237965
3.44	52.8496	1.64907	34.7289	0.572706	15.0933	0.248899	1.43427	0.0236522
3.45	52.9901	1.66565	34.4737	0.574209	15.1405	0.252188	1.56823	0.0261212
3.46	53.1304	1.69046	34.403	0.581568	16.2191	0.274176	1.50439	0.0254311
3.47	53.2733	1.74835	34.5276	0.603663	18.0683	0.315897	1.29353	0.0226155
3.48	53.4279	1.62926	36.6601	0.597291	19.6123	0.319537	1.12549	0.0183373
3.49	53.5428	1.24562	37.7959	0.470794	19.695	0.245325	1.11963	0.0139463
3.5	53.6274	1.03693	36.0014	0.373309	19.1363	0.19843	1.19195	0.0123596
3.51	53.7121	1.14092	34.6502	0.395332	18.7102	0.213469	1.2496	0.0142569
3.52	53.8136	1.36963	35.314	0.483671	18.6771	0.255808	1.21995	0.0167088
3.53	53.9346	1.49548	36.3352	0.543387	18.6103	0.278314	1.16625	0.017441
3.54	54.0555	1.45019	33.4311	0.484815	18.1593	0.263344	1.34106	0.019448
3.55	54.1712	1.21971	30.0987	0.367118	18.8034	0.229348	1.36908	0.0166988
3.56	54.2571	1.008	29.3228	0.295575	19.2829	0.194372	1.35743	0.013683
3.57	54.339	0.995432	27.9632	0.278355	19.5011	0.19412	1.44169	0.0143511
3.58	54.4209	1.29798	23.5541	0.305727	20.3296	0.263873	1.54872	0.020102
3.59	54.5551	2.11773	18.5307	0.392431	22.6293	0.479228	1.4462	0.0306265
3.6	54.7812	2.69217	16.5496	0.445545	24.8055	0.667807	1.23411	0.0332243
3.61	55.0084	2.65143	12.069	0.320002	22.4213	0.594485	1.4643	0.0388248
3.62	55.2356	3.31529	12.3917	0.41082	22.4155	0.743138	1.51491	0.0502238
3.63	55.572	3.15515	11.9482	0.376982	21.066	0.664664	1.54992	0.0489024
3.64	55.7723	2.38105	16.8959	0.402301	21.3991	0.509524	1.43982	0.0342828
3.65	55.9726	2.38158	13.0424	0.310615	16.9681	0.40411	2.01479	0.0479838
3.66	56.1729	2.39172	10.3422	0.247356	18.0034	0.430592	1.95162	0.0466772
3.67	56.3732	2.71644	10.9948	0.298666	23.2088	0.630455	1.60582	0.0436212
3.68	56.6365	3.40154	13.9928	0.475971	21.7954	0.741379	1.57617	0.0536141
3.69	56.9552	3.64753	22.8528	0.833562	17.1615	0.62597	1.95446	0.0712896
3.7	57.2489	3.45341	12.4998	0.431668	22.6759	0.783091	1.64636	0.0568556
3.71	57.5426	3.45043	10.0009	0.345073	20.4345	0.70508	1.7677	0.0609932
3.72	57.8364	3.39703	16.163	0.549063	16.6031	0.564013	1.82054	0.0618443
3.73	58.1198	3.39332	24.6958	0.838007	15.3798	0.521887	1.74021	0.0590507
3.74	58.3983	3.3452	16.4613	0.550664	17.8529	0.597218	1.60351	0.0536406
3.75	58.6769	3.31099	15.6385	0.51779	19.389	0.641968	1.56116	0.0516898
3.76	58.9554	2.99633	23.7832	0.712622	16.7824	0.502854	1.47064	0.0440653
3.77	59.1771	2.58642	27.93	0.722387	16.6948	0.431797	1.48367	0.038374
3.78	59.378	2.41798	22.1371	0.535271	17.6831	0.427573	1.56228	0.0377757
3.79	59.5789	2.37441	15.9197	0.377997	19.3989	0.460609	1.5964	0.0379051
3.8	59.7798	2.3494	16.6304	0.390715	20.029	0.470562	1.47182	0.0345789
3.81	59.9807	2.39464	13.0867	0.31338	20.7047	0.495804	1.47446	0.0353082
3.82	60.1816	2.42673	16.0228	0.388829	21.3555	0.518239	1.3815	0.0335252
3.83	60.3825	2.42203	13.3449	0.323218	20.9951	0.508508	1.58656	0.0384271
3.84	60.5834	2.77732	24.4234	0.678314	20.8804	0.579915	1.47388	0.0409342
3.85	60.8332	3.08145	12.9326	0.39851	26.4632	0.815451	1.38337	0.0426278
3.86	61.0976	3.1281	5.63937	0.176405	30.9442	0.967965	1.16766	0.0365255
3.87	61.3621	3.12246	6.21469	0.194051	28.1255	0.878208	1.27383	0.0397747
3.88	61.6265	3.17214	8.78872	0.27879	24.4548	0.775738	1.51347	0.0480094
3.89	61.891	3.15356	14.059	0.443357	25.4621	0.802961	1.53641	0.0484515
3.9	62.1554	3.21681	11.254	0.362021	27.0346	0.869651	1.52648	0.0491038
3.91	62.4387	3.38776	9.05047	0.306609	29.4881	0.998988	1.36185	0.0461364
3.92	62.7309	3.42417	12.3185	0.421808	19.8403	0.679366	1.80284	0.0617322
3.93	63.0231	3.5117	19.7811	0.694652	20.2064	0.709587	1.68019	0.0590033
3.94	63.3243	3.74058	16.839	0.629875	19.5063	0.729646	1.87874	0.0702755
3.95	63.6516	3.86595	7.31703	0.282873	21.8656	0.845313	1.74136	0.0673202
3.96	63.9847	4.20046	9.50569	0.399283	25.1162	1.055	1.54207	0.0647741
3.97	64.3614	4.42478	7.37377	0.326273	24.2767	1.07419	1.512	0.0669028
3.98	64.7381	4.46223	10.3839	0.463353	22.8845	1.02116	1.66271	0.0741938
3.99	65.1148	4.33597	12.0144	0.520942	28.5258	1.23687	1.19071	0.0516289
4	65.4691	3.34857	8.3685	0.280225	26.9148	0.901262	1.3748	0.0460361
4.01	65.6818	2.48942	6.66383	0.165891	24.1672	0.601623	1.51016	0.0375942
4.02	65.8945	2.52515	9.00817	0.22747	24.8551	0.62763	1.54547	0.0390254
4.03	66.1072	2.48715	8.44953	0.210152	28.3572	0.705285	1.26467	0.0314541
4.04	66.3199	2.48394	10.73	0.266525	24.7259	0.614176	1.39565	0.034667
4.05	66.5326	2.52674	12.7314	0.321689	22.2395	0.561934	1.65565	0.041834
4.06	66.7453	3.02346	9.39579	0.284078	25.8424	0.781335	1.38683	0.0419303
4.07	67.045	3.93652	9.87549	0.388751	23.3226	0.918099	1.452	0.0571581
4.08	67.4145	4.56257	16.2529	0.741549	22.9327	1.04632	1.30771	0.059665
4.09	67.784	4.58053	18.3009	0.838279	21.3219	0.976658	1.35439	0.0620381
4.1	68.1535	4.12139	27.7353	1.14308	20.6134	0.849556	1.24373	0.0512588
4.11	68.4382	2.81934	19.2309	0.542185	26.8029	0.755666	0.947308	0.0267079
4.12	68.6153	2.19599	20.3566	0.44703	25.6045	0.562272	0.962452	0.0211353
4.13	68.7925	2.22739	22.4673	0.500434	23.0635	0.513715	1.13965	0.0253844
4.14	68.9697	2.20982	18.6855	0.412915	24.8392	0.548902	1.31371	0.0290306
4.15	69.1468	2.20799	21.8089	0.481539	23.3478	0.515516	1.23742	0.0273222
4.16	69.324	2.21991	25.6145	0.568619	22.2062	0.492958	1.12233	0.0249148
4.17	69.5012	2.26716	21.0346	0.476888	21.9924	0.498602	1.36231	0.0308857
4.18	69.6871	2.44295	24.6324	0.601755	21.8185	0.533014	1.26469	0.0308958
4.19	69.8933	2.84161	30.3771	0.8632	20.0245	0.569019	1.37081	0.0389531
4.2	70.1363	3.41333	32.9866	1.12594	21.1662	0.722472	1.24	0.0423253
4.21	70.4269	3.60515	15.7408	0.567478	27.3947	0.987617	1.17235	0.042265
4.22	70.7175	3.68281	21.8055	0.803055	25.4515	0.93733	1.26635	0.0466374
4.23	71.0081	3.85204	21.5137	0.828715	25.239	0.972215	1.25788	0.0484541
4.24	71.3279	4.28972	17.1916	0.737472	34.324	1.47241	0.78979	0.0338798
4.25	71.6796	4.45281	9.01151	0.401265	33.5744	1.49501	0.769414	0.0342605
4.26	72.0313	4.40241	15.9519	0.702269	30.8409	1.35774	1.05005	0.0462276
4.27	72.383	4.25563	29.4151	1.2518	20.7326	0.882303	1.36753	0.0581972
4.28	72.7347	4.1215	26.576	1.09533	18.8981	0.778884	1.5664	0.064559
4.29	73.077	4.02524	23.385	0.941305	17.4375	0.701904	1.75188	0.0705176
4.3	73.4147	4.01195	22.0626	0.88514	20.6419	0.828142	1.65195	0.0662753
4.31	73.7524	3.89982	12.2876	0.479195	22.5933	0.881098	1.78938	0.0697825
4.32	74.0901	3.93404	17.0021	0.668867	25.0339	0.984842	1.42102	0.0559036
4.33	74.4278	3.99945	11.5006	0.459961	30.2699	1.21063	1.19407	0.0477563
4.34	74.7655	3.83853	17.7095	0.679783	27.3828	1.0511	1.15948	0.0445069
4.35	75.0639	3.28216	20.8263	0.683554	21.5996	0.708935	1.40115	0.0459881
4.36	75.315	2.95628	12.9146	0.381791	24.5859	0.726828	1.40678	0.0415884
4.37	75.566	2.93367	7.93362	0.232746	25.1975	0.739213	1.39345	0.0408792
4.38	75.8171	3.03011	18.1456	0.54983	20.0262	0.606814	1.41377	0.0428387
4.39	76.0782	3.89518	25.603	0.997283	20.2172	0.787495	1.14209	0.0444866
4.4	76.4673	4.71472	26.954	1.27081	19.6628	0.927048	1.31907	0.0621905
4.41	76.8565	4.80368	35.6514	1.71258	18.4568	0.886608	1.09839	0.052763
4.42	77.2457	3.24526	36.1667	1.1737	13.0414	0.423227	1.71196	0.0555573
4.43	77.3719	1.451	29.9064	0.433942	15.3129	0.22219	1.70924	0.0248011
4.44	77.4836	1.40626	25.1588	0.353798	17.2323	0.24233	1.64106	0.0230775
4.45	77.6096	1.68297	25.8961	0.435822	17.9069	0.301366	1.51158	0.0254395
4.46	77.7667	1.91768	29.2829	0.561551	17.7552	0.340488	1.47776	0.0283387
4.47	77.9237	1.94723	29.1807	0.568217	17.9137	0.34882	1.51438	0.0294885
4.48	78.0807	1.92083	23.8537	0.458189	18.9874	0.364715	1.62105	0.0311377
4.49	78.2378	2.13092	19.1432	0.407928	19.6352	0.418411	1.66096	0.0353938
4.5	78.4361	2.44531	25.3709	0.620398	18.3515	0.448753	1.60011	0.0391277
4.51	78.6413	2.51643	23.7839	0.598505	18.644	0.469162	1.73853	0.0437487
4.52	78.8465	2.49869	18.2019	0.454808	18.6662	0.46641	1.87698	0.0469
4.53	79.0517	2.48661	20.1224	0.500365	18.3157	0.455441	1.77949	0.0442489
4.54	79.2569	2.49753	25.4471	0.635549	19.4988	0.486987	1.58638	0.0396202
4.55	79.4621	2.74008	37.659	1.03189	17.6611	0.483927	1.35101	0.0370186
4.56	79.6922	2.9911	21.724	0.649787	19.1556	0.572962	1.8498	0.0553292
4.57	79.953	3.17464	22.1562	0.703378	22.2248	0.705558	1.50239	0.0476955
4.58	80.2137	3.22191	40.2634	1.29725	16.561	0.533582	1.35591	0.0436862
4.59	80.4645	3.17942	49.6269	1.57785	15.3607	0.48838	1.16913	0.0371716
4.6	80.7025	2.87619	25.2986	0.727636	20.7884	0.597914	1.63514	0.0470296
4.61	80.9405	2.93365	30.1883	0.885619	20.6578	0.606027	1.44407	0.042364
4.62	81.1755	2.94224	36.0264	1.05998	19.0165	0.559512	1.42735	0.0419962
4.63	81.409	2.92057	37.4764	1.09452	18.6727	0.545348	1.4369	0.0419656
4.64	81.6387	2.84581	29.2256	0.831705	20.6667	0.588134	1.57118	0.0447127
4.65	81.8682	2.80296	29.2749	0.820562	21.9455	0.615123	1.33909	0.0375341
4.66	82.0911	2.58076	36.9532	0.953675	20.6622	0.533243	1.22415	0.0315924
4.67	82.2802	2.3232	26.8096	0.622842	24.4804	0.56873	1.24388	0.0288979
4.68	82.4693	2.34122	25.2954	0.592222	26.322	0.616257	1.22022	0.0285681
4.69	82.6585	2.33	25.4322	0.592571	26.8158	0.624808	1.22104	0.0284503
4.7	82.8476	2.39234	31.5457	0.754678	24.8449	0.594373	1.12167	0.0268341
4.71	83.0417	2.7228	46.4804	1.26557	19.6603	0.535311	0.972507	0.0264795
4.72	83.2661	2.90155	42.515	1.2336	18.8729	0.547608	1.12483	0.0326375
4.73	83.4905	2.78415	24.9268	0.693999	20.6245	0.574218	1.67809	0.0467207
4.74	83.7148	2.81884	39.6549	1.11781	17.5649	0.495127	1.25918	0.0354942
4.75	83.9342	2.75194	54.1225	1.48942	15.6321	0.430187	0.868614	0.0239037
4.76	84.1163	1.8722	28.3	0.529833	19.6419	0.367736	1.53676	0.0287713
4.77	84.2276	1.54745	13.1966	0.204211	21.8733	0.338479	1.78947	0.0276913
4.78	84.3663	2.28935	7.57833	0.173495	22.8091	0.52218	1.77105	0.0405456
4.79	84.6076	2.94218	16.9351	0.498261	23.2729	0.684731	1.42311	0.0418705
4.8	84.8489	2.98493	26.8919	0.802705	20.7269	0.618683	1.42364	0.0424946
4.81	85.0902	2.56239	24.8761	0.637422	19.3906	0.496863	1.70028	0.0435677
4.82	85.2716	2.00083	24.3056	0.486313	21.5362	0.430902	1.38381	0.0276877
4.83	85.4235	2.05179	32.727	0.671491	20.219	0.414852	1.28783	0.0264236
4.84	85.6054	2.4946	39.8534	0.994181	18.2124	0.454325	1.19328	0.0297676
4.85	85.8175	2.59512	28.9965	0.752496	18.5837	0.482269	1.57101	0.0407696
4.86	86.0249	2.41858	17.3625	0.419926	21.7902	0.527014	1.62245	0.0392403
4.87	86.2203	2.38238	29.1471	0.694395	19.3951	0.462066	1.48098	0.0352826
4.88	86.4157	2.47854	42.3666	1.05007	16.8674	0.418065	1.25882	0.0312004
4.89	86.6111	2.45907	42.2544	1.03907	17.481	0.42987	1.24386	0.0305874
4.9	86.8065	2.37455	27.3412	0.64923	21.7375	0.516168	1.3889	0.0329801
4.91	87.003	2.91425	17.5425	0.511232	24.3163	0.708638	1.49537	0.0435787
4.92	87.2955	4.00069	31.3257	1.25325	21.5152	0.860758	1.23581	0.0494411
4.93	87.65	4.13141	36.425	1.50487	19.2916	0.797015	1.27499	0.0526749
4.94	87.9604	3.96169	44.1416	1.74875	18.5267	0.733968	1.03728	0.0410939
4.95	88.2599	3.78388	31.3587	1.18658	20.6483	0.781305	1.40471	0.0531523
4.96	88.5593	3.76545	26.4573	0.996234	21.0246	0.791671	1.54626	0.0582236
4.97	88.8586	3.90578	48.4535	1.89249	15.9444	0.622755	1.2038	0.0470178
4.98	89.1541	3.44501	41.5505	1.43142	17.6477	0.607964	1.28857	0.0443913
4.99	89.3921	3.1975	58.4536	1.86906	14.6414	0.468159	0.832979	0.0266345
5	89.6235	2.50357	42.9438	1.07513	17.7581	0.444587	1.38867	0.0347664
5.01	89.7766	1.92887	36.4271	0.702631	19.0559	0.367564	1.5796	0.0304685
5.02	89.9298	2.08123	53.7872	1.11944	16.2357	0.337903	1.01236	0.0210696
5.03	90.0829	2.14167	63.357	1.3569	13.625	0.291803	0.801201	0.0171591
5.04	90.2361	2.12393	60.7076	1.28939	13.9181	0.29561	0.87882	0.0186655
5.05	90.3893	1.99906	47.4797	0.949148	17.6665	0.353165	1.1005	0.0219997
5.06	90.5425	1.83802	37.4897	0.68907	20.8665	0.383532	1.20458	0.0221404
5.07	90.6821	1.75105	47.3137	0.828488	18.8564	0.330186	1.02898	0.018018
5.08	90.8173	1.83248	52.5991	0.963871	17.5736	0.322033	0.928181	0.0170088
5.09	90.9525	1.81165	58.6338	1.06224	15.9662	0.289252	0.829683	0.015031
5.1	91.0784	1.55565	62.1788	0.967285	14.561	0.226518	0.846951	0.0131756
5.11	91.1803	1.41988	65.5634	0.93092	13.0153	0.184801	0.83427	0.0118456
5.12	91.2822	1.43484	68.4409	0.982019	11.8465	0.169979	0.778096	0.0111645
5.13	91.384	1.42483	70.9092	1.01033	11.0115	0.156895	0.701565	0.00999608
5.14	91.4859	1.79259	73.5187	1.31789	10.379	0.186054	0.608885	0.0109148
5.15	91.6315	2.62382	68.9606	1.80941	11.7217	0.307556	0.741422	0.0194536
5.16	91.8511	2.82255	37.5529	1.05995	17.567	0.495837	1.68053	0.0474339
5.17	92.0707	2.29226	23.8786	0.54736	22.0406	0.505229	1.57232	0.0360416
5.18	92.2218	1.67065	35.3634	0.590797	20.1863	0.337242	1.33407	0.0222876
5.19	92.3341	1.42755	35.7981	0.511037	19.8322	0.283116	1.38412	0.0197591
5.2	92.4465	1.41114	34.3474	0.484688	20.2864	0.286269	1.45232	0.0204942
5.21	92.5588	1.42509	36.2067	0.515979	20.5283	0.292548	1.36461	0.0194469
5.22	92.6712	1.46871	38.4899	0.565305	20.1736	0.296291	1.33889	0.0196644
5.23	92.7835	1.47494	35.014	0.516436	20.0284	0.295408	1.53888	0.0226976
5.24	92.903	2.01184	27.4213	0.551673	21.3032	0.428588	1.6396	0.0329862
5.25	93.1052	3.50744	22.9476	0.804873	23.3996	0.820727	1.44775	0.0507791
5.26	93.4723	4.30895	44.9924	1.9387	18.4395	0.794548	1.18668	0.0511335
5.27	93.7827	3.73214	49.8119	1.85905	15.8426	0.59127	1.44665	0.0539912
5.28	94.0551	3.41239	44.6315	1.523	17.6019	0.600646	1.36819	0.046688
5.29	94.3274	3.7051	63.4064	2.34927	13.9077	0.515294	0.838157	0.0310546
5.3	94.5998	3.32934	65.9229	2.1948	13.2265	0.440355	0.740781	0.0246631
5.31	94.8162	2.21592	58.6823	1.30035	14.0265	0.310815	1.07841	0.0238966
5.32	94.9396	1.68758	61.3978	1.03613	13.0984	0.221045	1.01197	0.0170778
5.33	95.073	1.91343	63.2575	1.21039	12.9177	0.247171	0.934077	0.0178729
5.34	95.2252	1.94078	44.8799	0.871019	16.2733	0.31583	1.54097	0.0299069
5.35	95.3775	1.91163	15.955	0.305001	21.4792	0.410603	2.12461	0.0406147
5.36	95.5493	2.22058	14.9044	0.330964	21.3986	0.475175	2.07815	0.046147
5.37	95.7515	2.43386	24.0743	0.585934	21.2986	0.518378	1.82098	0.0443199
5.38	95.9536	2.42722	22.3493	0.542468	22.0611	0.535473	1.85948	0.0451338
5.39	96.1558	2.76973	18.7108	0.518237	23.4565	0.649681	1.95667	0.0541944
5.4	96.4202	3.20809	27.0324	0.867224	23.6309	0.758101	1.5495	0.0497095
5.41	96.6893	3.482	46.8033	1.62969	18.4485	0.642375	1.23841	0.0431213
5.42	96.9584	3.11372	19.9347	0.62071	21.471	0.668549	2.19012	0.0681942
5.43	97.2018	3.18905	30.5313	0.97366	20.9351	0.66763	1.52559	0.0486518
5.44	97.4686	4.65088	20.2532	0.941954	21.7971	1.01376	1.93876	0.0901694
5.45	97.9592	5.04082	15.8941	0.801192	24.4227	1.2311	1.96449	0.0990261
5.46	98.2801	3.89745	26.2118	1.02159	25.5454	0.995619	1.37657	0.053651
5.47	98.5857	3.55918	22.9608	0.817216	26.0645	0.927682	1.45066	0.0516316
5.48	98.8526	2.88719	46.1274	1.33179	19.2351	0.555354	1.09882	0.0317249
5.49	99.0286	2.21751	32.1074	0.711984	19.9903	0.443287	1.65983	0.0368069
5.5	99.2046	2.25005	30.7716	0.692376	21.569	0.485315	1.58132	0.0355806
5.51	99.3864	2.57217	45.3965	1.16768	19.5842	0.503738	1.04016	0.0267547
5.52	99.5953	2.53118	36.8432	0.932566	20.4962	0.518794	1.362	0.0344747
5.53	99.7836	2.4035	41.3646	0.994197	19.1666	0.460668	1.31561	0.0316207
5.54	99.9681	2.50254	26.7102	0.668432	22.9772	0.575013	1.42973	0.0357794
5.55	100.183	2.81553	17.8533	0.502666	26.1491	0.736234	1.48607	0.0418408
5.56	100.429	3.22075	31.6634	1.0198	22.1986	0.714961	1.2981	0.0418085
5.57	100.678	3.0228	43.5754	1.3172	17.2231	0.52062	1.46257	0.0442104
5.58	100.897	2.76618	45.1328	1.24845	17.3863	0.480936	1.37908	0.0381477
5.59	101.104	2.55716	36.1636	0.92476	20.2857	0.518737	1.37122	0.0350643
5.6	101.302	2.33794	30.3565	0.709717	21.2979	0.497932	1.54034	0.0360121
5.61	101.477	2.27672	35.8063	0.81521	20.3497	0.463306	1.40795	0.032055
5.62	101.656	2.33583	37.7298	0.881305	19.7989	0.462468	1.4048	0.0328137
5.63	101.835	2.76383	24.6849	0.68225	20.2996	0.561046	1.78904	0.049446
5.64	102.092	3.485	28.0683	0.97818	19.6986	0.686499	1.68172	0.0586082
5.65	102.391	3.747	24.7294	0.926612	20.6799	0.774877	1.67594	0.0627974
5.66	102.687	3.60843	34.6573	1.25059	18.6967	0.674657	1.54208	0.0556448
5.67	102.958	3.39722	21.9938	0.747177	21.795	0.740424	1.5998	0.0543487
5.68	103.23	3.3959	26.4654	0.898738	22.5917	0.767192	1.45913	0.0495507
5.69	103.501	3.03729	40.6053	1.2333	19.3469	0.587621	1.21438	0.0368844
5.7	103.701	2.51984	27.2097	0.685641	21.6309	0.545064	1.6469	0.0414993
5.71	103.9	3.266	17.2093	0.562057	23.2424	0.759098	1.71764	0.0560981
5.72	104.241	3.95725	37.6617	1.49037	19.3157	0.76437	1.41074	0.0558264
5.73	104.525	3.20647	48.5618	1.55712	16.4728	0.528195	1.19971	0.0384683
5.74	104.734	2.55319	27.9113	0.712629	21.097	0.538648	1.58152	0.0403793
5.75	104.938	2.47372	12.5604	0.310709	24.1281	0.596863	1.81585	0.0449191
5.76	105.147	2.54946	13.53	0.344941	23.1176	0.589374	1.88857	0.0481483
5.77	105.364	2.64784	20.1079	0.532424	22.5931	0.598229	1.75501	0.0464698
5.78	105.581	2.87002	33.5569	0.963089	19.8674	0.570196	1.62115	0.0465273
5.79	105.828	3.694	28.2323	1.0429	19.1242	0.706449	1.70059	0.0628199
5.8	106.168	5.33393	7.99464	0.426428	22.4127	1.19548	2.08776	0.11136
5.81	106.711	6.60862	11.5796	0.765254	22.1784	1.46569	1.94353	0.12844
5.82	107.253	5.59774	11.1167	0.622285	24.0669	1.3472	1.77332	0.0992659
5.83	107.626	4.35037	19.7595	0.85961	24.1437	1.05034	1.56082	0.0679016
5.84	107.963	4.20607	26.1148	1.09841	23.2729	0.978876	1.51822	0.0638573
5.85	108.3	3.49735	23.5678	0.82425	24.7901	0.866996	1.49858	0.0524106
5.86	108.527	2.8181	28.9817	0.816735	22.8054	0.642678	1.51152	0.0425961
5.87	108.754	2.863	30.9778	0.886894	21.9391	0.628117	1.48045	0.0423854
5.88	108.981	2.73796	37.3704	1.02319	20.0993	0.550311	1.34406	0.0367998
5.89	109.188	2.50109	31.0609	0.776862	19.3422	0.483767	1.654	0.0413679
5.9	109.374	2.25206	13.5639	0.305469	20.1303	0.453347	2.64059	0.0594678
5.91	109.56	2.42941	33.1372	0.80504	18.8703	0.458437	1.91574	0.0465413
5.92	109.759	2.7236	35.379	0.963581	17.3157	0.471611	2.13426	0.0581287
5.93	109.989	2.96466	49.6941	1.47326	16.3679	0.485254	1.29453	0.0383785
5.94	110.21	2.41533	28.4218	0.68648	19.4067	0.468735	2.14532	0.0518164
5.95	110.373	2.10292	17.3053	0.363918	21.0473	0.442608	2.42926	0.0510854
5.96	110.553	2.26486	13.016	0.294792	23.5864	0.534199	2.28568	0.0517674
5.97	110.747	2.39147	17.2234	0.411893	25.6588	0.613623	1.95922	0.0468542
5.98	110.946	3.06329	33.8053	1.03556	23.153	0.709242	1.59882	0.0489767
5.99	111.235	3.7625	45.3013	1.70446	19.6963	0.741074	1.3661	0.0513997
6	111.529	3.70043	41.8375	1.54817	19.777	0.731835	1.36251	0.0504187
6.01	111.823	3.73136	44.9487	1.6772	18.7384	0.699197	1.38264	0.0515912
6.02	112.117	3.72818	41.9672	1.56462	16.8262	0.627311	1.6507	0.0615413
6.03	112.394	3.30039	43.5422	1.43706	17.5544	0.579363	1.5547	0.0513112
6.04	112.632	3.00043	31.6285	0.94899	20.2452	0.607444	1.90907	0.0572802
6.05	112.87	3.01639	58.7591	1.7724	15.8982	0.479551	0.982599	0.029639
6.06	113.074	2.61988	51.3802	1.3461	17.4603	0.457439	1.0621	0.0278257
6.07	113.256	2.59917	28.6982	0.745914	22.8549	0.594038	1.59641	0.0414935
6.08	113.483	3.06404	37.3954	1.14581	20.3311	0.622953	1.48077	0.0453713
6.09	113.737	3.50391	61.8058	2.16562	15.591	0.546294	0.759971	0.0266287
6.1	113.99	3.54193	51.7529	1.83305	18.4763	0.654418	0.989383	0.0350432
6.11	114.261	3.42018	24.5542	0.839796	24.2885	0.830711	1.63686	0.0559835
6.12	114.532	3.21301	26.3702	0.847277	26.2054	0.841982	1.52504	0.0489995
6.13	114.771	3.05511	54.6303	1.66902	19.4387	0.593876	0.842809	0.0257488
6.14	114.987	3.18171	57.2062	1.82013	18.8855	0.600883	0.726234	0.0231067
6.15	115.232	3.1062	47.7293	1.48257	20.3367	0.631698	1.23394	0.0383285
6.16	115.461	2.87864	49.546	1.42625	20.152	0.580102	1.15493	0.0332461
6.17	115.675	2.85154	55.4446	1.58102	17.6424	0.503079	1.17315	0.0334528
6.18	115.89	2.97723	65.7459	1.95741	15.134	0.450575	0.705177	0.0209948
6.19	116.105	2.84228	53.6439	1.52471	16.4843	0.468529	1.28761	0.0365974
6.2	116.319	2.91049	55.2746	1.60876	16.2837	0.473936	1.23801	0.0360322
6.21	116.539	2.96351	65.1206	1.92986	12.8858	0.381872	0.982201	0.0291077
6.22	116.743	2.3497	70.3223	1.65236	11.6519	0.273784	0.70798	0.0166354
6.23	116.869	1.9031	48.3762	0.920646	15.8433	0.301513	1.52692	0.0290589
6.24	117.03	2.4613	41.1154	1.01197	17.1676	0.422546	1.76421	0.0434225
6.25	117.259	2.97375	53.8552	1.60152	15.1489	0.450491	1.47831	0.0439614
6.26	117.487	3.14464	63.9911	2.01229	14.6033	0.45922	0.8605	0.0270596
6.27	117.716	3.05079	73.5658	2.24434	10.9283	0.3334	0.641911	0.0195834
6.28	117.916	2.75873	68.6449	1.89373	12.0399	0.33215	0.773959	0.0213515
6.29	118.113	3.41278	46.1846	1.57618	17.7701	0.606456	1.58902	0.0542299
6.3	118.435	5.74831	67.078	3.85585	14.3342	0.823973	0.627287	0.0360584
6.31	118.936	6.04722	56.291	3.40404	17.5407	1.06072	0.856926	0.0518202
6.32	119.334	4.83985	65.2259	3.15684	13.7366	0.664832	0.797707	0.0386078
6.33	119.661	4.27547	49.4014	2.11214	18.5375	0.792563	1.21546	0.0519667
6.34	119.99	3.95884	61.247	2.42467	15.2119	0.602215	0.810684	0.0320937
6.35	120.248	3.42117	68.6783	2.3496	11.8012	0.403738	0.870044	0.0297656
6.36	120.483	3.6747	39.3487	1.44595	17.3553	0.637757	1.79384	0.0659183
6.37	120.812	4.74136	52.9331	2.50975	17.7312	0.840698	1.35065	0.0640391
6.38	121.205	5.0236	46.7271	2.34739	19.5839	0.983818	1.03365	0.0519267
6.39	121.581	3.95129	22.633	0.894298	25.1158	0.9924	1.21975	0.048196
6.4	121.845	2.95571	47.7763	1.41213	20.412	0.60332	1.40385	0.0414936
6.41	122.041	2.56522	49.3698	1.26644	19.355	0.496498	1.33527	0.0342526
6.42	122.235	2.50054	44.6084	1.11545	21.2105	0.530377	1.34167	0.0335489
6.43	122.427	2.3128	45.0776	1.04256	20.9684	0.484959	1.27658	0.0295247
6.44	122.595	2.19777	50.6519	1.11322	18.4527	0.405549	1.12111	0.0246394
6.45	122.76	2.14796	47.2608	1.01514	19.3383	0.415379	1.2209	0.0262246
6.46	122.924	2.11151	40.459	0.854296	19.531	0.412398	1.55036	0.0327361
6.47	123.091	2.5361	57.3435	1.45429	17.6159	0.446758	0.818305	0.020753
6.48	123.301	2.76534	43.5129	1.20328	21.5368	0.595565	1.12534	0.0311195
6.49	123.512	2.68958	38.6642	1.03991	22.3784	0.601886	1.26832	0.0341126
6.5	123.724	2.68116	28.6807	0.768977	23.7769	0.637497	1.61173	0.0432132
6.51	123.945	2.88153	22.6425	0.65245	24.9803	0.719813	1.66426	0.047956
6.52	124.193	3.1887	43.9634	1.40186	21.2788	0.678515	1.17718	0.0375367
6.53	124.441	3.1893	42.1118	1.34307	22.343	0.712584	1.19551	0.0381285
6.54	124.691	3.42562	54.9375	1.88195	17.09	0.585438	1.00005	0.034258
6.55	124.957	3.2191	30.4722	0.980931	23.0276	0.741282	1.53837	0.0495216
6.56	125.199	2.15484	14.9646	0.322462	25.0742	0.540308	1.99908	0.043077
6.57	125.31	1.168	19.9129	0.232582	23.4219	0.273568	2.10885	0.0246314
6.58	125.395	1.44159	20.0097	0.288457	24.5261	0.353565	1.95777	0.0282229
6.59	125.552	2.36853	37.9013	0.897704	20.0757	0.4755	1.51961	0.0359925
6.6	125.775	2.75051	32.1577	0.8845	19.7722	0.543835	2.04264	0.0561828
6.61	126.003	3.34086	36.5368	1.22064	19.8994	0.66481	1.59067	0.0531422
6.62	126.312	4.28225	34.9311	1.49584	21.6039	0.925135	1.57554	0.0674688
6.63	126.686	4.89081	56.8461	2.78024	18.1142	0.885933	0.752887	0.0368223
6.64	127.061	4.31352	44.8753	1.93571	21.0403	0.907579	1.27603	0.0550419
6.65	127.366	3.5011	43.2533	1.51434	21.0538	0.737113	1.18564	0.0415104
6.66	127.614	3.20671	50.3249	1.61377	18.4808	0.592624	1.1326	0.0363192
6.67	127.862	3.65524	65.2447	2.38485	14.5284	0.531048	0.711058	0.0259909
6.68	128.148	3.91879	34.1325	1.33758	23.2914	0.912743	1.37727	0.0539723
6.69	128.485	4.18716	44.9106	1.88048	21.2313	0.888991	1.13757	0.047632
6.7	128.815	4.11823	41.7023	1.7174	21.4637	0.883923	1.23772	0.0509724
6.71	129.143	3.4497	58.3054	2.01136	17.3322	0.597908	0.901297	0.031092
6.72	129.338	2.48873	46.6191	1.16022	20.6348	0.513544	1.14096	0.0283954
6.73	129.529	2.40081	37.1295	0.891411	24.4778	0.587666	1.17443	0.0281958
6.74	129.72	2.63584	31.5051	0.830424	26.5782	0.700557	1.42366	0.0375253
6.75	129.953	3.3784	36.2972	1.22626	26.7005	0.90205	1.1079	0.0374291
6.76	130.256	3.93233	46.3257	1.82168	22.635	0.890082	1.02186	0.040183
6.77	130.564	4.00515	50.875	2.03762	20.7325	0.830368	0.867232	0.0347339
6.78	130.87	3.62759	24.4038	0.88527	28.0269	1.0167	1.60175	0.058105
6.79	131.141	3.7039	49.8465	1.84627	20.5174	0.759943	1.0255	0.0379834
6.8	131.425	3.66226	36.2883	1.32897	26.4389	0.968259	1.18423	0.0433697
6.81	131.707	3.8022	44.1457	1.67851	23.1221	0.879148	1.10039	0.0418392
6.82	132.004	4.05713	41.9521	1.70205	26.2618	1.06548	0.884388	0.0358808
6.83	132.328	4.27718	43.3555	1.85439	27.571	1.17926	0.660368	0.0282451
6.84	132.653	4.52363	59.0185	2.66978	19.2586	0.87119	0.665142	0.0300886
6.85	132.985	4.87919	59.5788	2.90696	18.2189	0.888934	0.697987	0.0340561
6.86	133.352	5.30979	45.0537	2.39225	22.582	1.19906	1.19726	0.0635722
6.87	133.787	5.9454	53.3851	3.17396	22.1516	1.317	0.744798	0.0442813
6.88	134.222	6.85041	62.6255	4.2901	17.4948	1.19846	0.648613	0.0444327
6.89	134.782	7.20904	58.101	4.18852	20.0123	1.44269	0.661403	0.0476808
6.9	135.291	6.39048	43.2234	2.76218	28.5264	1.82298	0.536128	0.0342612
6.91	135.765	6.44549	67.1557	4.32852	12.9226	0.832923	0.937439	0.0604226
6.92	136.217	4.9518	63.3623	3.13758	14.7246	0.729132	0.905952	0.044861
6.93	136.472	3.68955	70.3247	2.59467	11.8872	0.438586	0.831319	0.030672
6.94	136.725	3.69703	69.452	2.56766	13.5435	0.500706	0.72818	0.026921
6.95	136.977	4.03379	72.7407	2.9342	12.7356	0.513728	0.56645	0.0228494
6.96	137.267	4.00116	71.7125	2.86934	12.5331	0.50147	0.686925	0.027485
6.97	137.521	3.56613	62.9862	2.24617	15.6362	0.557609	0.934267	0.0333172
6.98	137.782	3.17818	68.7043	2.18355	12.024	0.382145	0.953	0.030288
6.99	137.974	2.86115	81.3436	2.32736	7.30545	0.209019	0.648115	0.0185435
7	138.157	2.89748	83.7066	2.42538	6.5256	0.189078	0.488676	0.0141593
7.01	138.341	2.77263	76.7535	2.12809	9.32522	0.258554	0.71387	0.019793
7.02	138.528	2.81542	75.0743	2.11365	10.1639	0.286157	0.873085	0.024581
7.03	138.724	3.52606	83.4118	2.94115	6.85908	0.241855	0.546927	0.019285
7.04	138.982	4.53465	82.9454	3.76128	7.36938	0.334176	0.500428	0.0226926
7.05	139.302	4.28547	78.429	3.36105	9.31431	0.399162	0.601371	0.0257715
7.06	139.553	2.91583	69.8904	2.03789	14.0083	0.408457	0.702803	0.0204926
7.07	139.706	2.27693	73.9223	1.68316	11.891	0.270751	0.633248	0.0144186
7.08	139.863	2.9053	70.9463	2.06121	13.1138	0.380996	0.640715	0.0186147
7.09	140.106	3.94235	77.4308	3.0526	10.1208	0.398999	0.573693	0.022617
7.1	140.399	4.31718	77.253	3.33515	10.339	0.446354	0.547144	0.0236212
7.11	140.691	4.46606	84.2102	3.76088	7.05026	0.314869	0.462875	0.0206723
7.12	140.983	4.59337	81.2075	3.73017	8.75593	0.402193	0.476515	0.0218881
7.13	141.289	4.4062	79.8254	3.51726	9.18795	0.40484	0.569978	0.0251143
7.14	141.573	4.26067	79.2775	3.37775	9.56065	0.407348	0.549798	0.0234251
7.15	141.86	4.30874	73.577	3.17025	12.0245	0.518103	0.688155	0.0296509
7.16	142.164	4.36657	79.9138	3.48949	9.13176	0.398745	0.496709	0.0216892
7.17	142.443	4.13509	55.7263	2.30433	16.6405	0.6881	1.40026	0.0579021
7.18	142.774	5.07833	59.3181	3.01237	17.2858	0.877829	1.0269	0.0521493
7.19	143.197	5.30378	65.8253	3.49123	15.1832	0.805286	0.781805	0.0414652
7.2	143.532	4.28815	58.5047	2.50877	17.8346	0.764776	1.02171	0.0438127
7.21	143.829	4.06632	63.26	2.57235	16.274	0.661753	0.843919	0.0343164
7.22	144.126	3.0118	55.5816	1.674	19.5437	0.588617	0.919364	0.0276894
7.23	144.273	1.85802	53.3558	0.99136	18.9273	0.351672	1.1867	0.0220491
7.24	144.405	2.13456	54.2779	1.15859	18.2486	0.389527	1.11969	0.0239004
7.25	144.593	2.59612	55.7289	1.44679	18.332	0.475922	1.17309	0.0304548
7.26	144.795	2.75364	58.5579	1.61247	17.6274	0.485396	0.943065	0.0259686
7.27	144.997	2.75639	56.0258	1.54429	18.2885	0.504102	1.06887	0.0294621
7.28	145.199	2.78572	45.6188	1.27081	21.592	0.601493	1.39701	0.0389168
7.29	145.421	3.09262	48.3558	1.49546	22.7689	0.704155	0.964082	0.0298153
7.3	145.665	3.32383	56.0139	1.86181	19.4254	0.645667	0.946053	0.0314452
7.31	145.909	3.44061	57.4877	1.97792	19.2954	0.66388	0.809012	0.0278349
7.32	146.166	3.29853	53.5975	1.76793	19.0845	0.629508	1.07569	0.0354818
7.33	146.397	3.19892	51.9729	1.66257	18.9064	0.6048	1.09028	0.0348771
7.34	146.643	3.22476	40.5483	1.30759	23.0722	0.744025	1.30923	0.0422197
7.35	146.893	3.17434	35.2123	1.11776	22.8772	0.7262	1.74454	0.0553777
7.36	147.143	3.09572	36.7295	1.13704	22.9989	0.71198	1.7685	0.0547478
7.37	147.383	3.02715	39.6545	1.2004	20.7078	0.626856	1.92667	0.0583231
7.38	147.62	3.00788	39.4762	1.1874	24.0724	0.724069	1.58082	0.0475491
7.39	147.859	3.48598	51.1138	1.78182	20.3535	0.70952	1.10578	0.0385474
7.4	148.15	4.00091	62.5652	2.50318	15.5997	0.624132	0.96177	0.0384796
7.41	148.443	3.9999	61.2234	2.44887	15.8817	0.635254	0.876	0.0350391
7.42	148.728	3.49922	41.1659	1.44049	23.2376	0.813134	1.3725	0.0480269
7.43	148.981	3.15702	62.0106	1.95769	15.9727	0.504261	0.897108	0.0283219
7.44	149.192	2.49686	55.6559	1.38965	17.347	0.43313	1.21948	0.0304487
7.45	149.36	2.24901	58.572	1.31729	16.3114	0.366844	1.1165	0.0251102
7.46	149.528	2.19173	42.5064	0.931625	19.1647	0.420038	1.8257	0.0400144
7.47	149.704	2.2155	20.8223	0.461317	24.3374	0.539194	2.37988	0.0527261
7.48	149.895	2.29152	38.6328	0.885278	21.6829	0.496867	1.78072	0.0408055
7.49	150.067	2.11921	36.1145	0.765342	22.0283	0.466825	1.9075	0.0404239
7.5	150.237	2.2044	46.3947	1.02272	21.2347	0.468098	1.20771	0.0266227
7.51	150.407	2.27846	51.6328	1.17643	21.2371	0.483879	0.926384	0.0211073
7.52	150.577	2.8466	47.0211	1.3385	21.7945	0.620403	1.37094	0.0390251
7.53	150.837	3.85569	54.3637	2.0961	19.4743	0.750869	1.04831	0.0404196
7.54	151.148	3.27601	53.2674	1.74504	20.2667	0.663937	1.10141	0.0360821
7.55	151.327	2.40884	52.3244	1.26041	20.0012	0.481796	1.17169	0.028224
7.56	151.506	2.41677	62.3593	1.50708	15.9252	0.384875	1.00051	0.02418
7.57	151.673	2.20823	70.0445	1.54674	12.9651	0.286299	0.793427	0.0175207
7.58	151.814	2.2789	63.8444	1.45495	15.5242	0.353781	0.967734	0.0220536
7.59	151.999	2.93284	71.0255	2.08307	14.2196	0.417039	0.461709	0.0135412
7.6	152.213	3.19843	77.4751	2.47799	10.6545	0.340777	0.475688	0.0152145
7.61	152.419	3.1975	70.9137	2.26746	13.0405	0.416969	0.628876	0.0201083
7.62	152.649	3.60263	69.045	2.48744	13.2465	0.477222	0.810367	0.0291946
7.63	152.927	3.88996	46.4603	1.80729	20.5967	0.801205	1.63502	0.0636017
7.64	153.249	4.25246	52.1827	2.21905	18.86	0.802015	1.27977	0.0544216
7.65	153.579	3.96159	58.5577	2.31982	17.0066	0.673734	1.07185	0.0424625
7.66	153.837	3.343	46.8331	1.56563	19.9914	0.668311	1.46411	0.048945
7.67	154.095	3.22771	22.6871	0.732274	25.7483	0.831081	2.22505	0.071818
7.68	154.357	2.92411	42.8304	1.25241	21.6059	0.631781	1.61261	0.0471546
7.69	154.551	2.254	48.226	1.08701	19.7442	0.445034	1.45019	0.0326872
7.7	154.701	2.45679	50.8903	1.25027	19.7327	0.48479	1.25042	0.0307201
7.71	154.922	3.04819	46.1841	1.40778	22.5923	0.688656	1.18929	0.036252
7.72	155.162	3.1299	43.7966	1.37079	24.1172	0.754842	1.35084	0.0422798
7.73	155.402	3.77514	37.3638	1.41053	27.2023	1.02693	1.20228	0.0453878
7.74	155.748	4.56523	25.896	1.18221	30.6021	1.39706	1.42716	0.0651529
7.75	156.126	4.8481	26.535	1.28644	29.4631	1.4284	1.5016	0.0727988
7.76	156.515	4.43657	23.9125	1.0609	27.3382	1.21288	1.79875	0.0798029
7.77	156.831	2.92983	17.6117	0.515992	24.4891	0.717488	2.37636	0.0696232
7.78	156.986	2.18418	11.1961	0.244544	25.6907	0.561131	2.38566	0.0521072
7.79	157.188	2.57449	17.5678	0.452281	25.5951	0.658944	2.20152	0.056678
7.8	157.402	2.79685	28.1532	0.787403	22.8981	0.640425	2.25247	0.0629981
7.81	157.632	3.61332	49.7551	1.79781	18.3068	0.661483	1.6395	0.0592405
7.82	157.961	4.29136	52.2942	2.24413	19.3804	0.831682	1.2964	0.055633
7.83	158.289	4.23242	68.0779	2.88134	13.675	0.578784	0.778069	0.0329311
7.84	158.565	3.77317	62.2399	2.34842	16.1722	0.610206	0.908279	0.0342709
7.85	158.84	3.49943	55.786	1.95219	16.8973	0.591308	1.50345	0.0526122
7.86	159.087	3.14978	34.8324	1.09715	22.7485	0.716527	2.27304	0.0715958
7.87	159.336	3.28072	53.0916	1.74178	18.9021	0.620125	1.29251	0.0424037
7.88	159.582	3.25052	40.7763	1.32544	20.8989	0.679322	1.94962	0.063373
7.89	159.846	3.53113	29.3197	1.03532	23.5039	0.829953	2.21152	0.0780917
7.9	160.136	3.64746	35.6116	1.29892	23.8917	0.871442	1.77281	0.0646627
7.91	160.425	3.00508	46.8393	1.40756	21.5018	0.646145	1.36808	0.041112
7.92	160.608	2.21364	30.6387	0.678232	26.0871	0.577475	1.83667	0.0406574
7.93	160.784	2.22437	38.6288	0.859248	24.8251	0.552202	1.46085	0.0324946
7.94	160.966	2.44047	57.1595	1.39496	19.4606	0.474928	0.90712	0.022138
7.95	161.148	2.38978	48.2527	1.15313	21.8026	0.521033	1.26606	0.0302561
7.96	161.33	2.30155	38.251	0.880366	25.8124	0.594086	1.5207	0.0349996
7.97	161.505	2.37802	54.3285	1.29194	20.0273	0.476252	1.07621	0.0255926
7.98	161.682	2.45358	58.284	1.43004	17.0898	0.419312	1.30181	0.0319408
7.99	161.862	2.4635	51.6457	1.27229	18.9167	0.466013	1.66179	0.0409382
8	162.05	2.66312	63.3489	1.68705	15.7454	0.419319	1.08332	0.0288501
8.01	162.249	2.68507	72.3379	1.94232	12.0052	0.322349	0.775138	0.020813
8.02	162.424	2.22631	75.0472	1.67078	10.9388	0.243531	0.671008	0.0149387
8.03	162.551	2.14647	69.1329	1.48391	12.989	0.278805	0.860068	0.0184611
8.04	162.723	2.58396	63.8989	1.65112	15.0982	0.390131	1.08894	0.0281376
8.05	162.922	2.77485	65.2766	1.81133	14.931	0.414313	0.926483	0.0257085
8.06	163.121	2.67524	52.7398	1.41091	20.5009	0.548448	1.16444	0.0311516
8.07	163.32	2.66936	50.8832	1.35826	20.5503	0.548562	1.39454	0.0372253
8.08	163.521	2.78083	58.1731	1.6177	16.1683	0.449614	1.47096	0.0409049
8.09	163.729	2.81602	59.352	1.67137	15.7875	0.44458	1.44536	0.0407017
8.1	163.937	2.84245	61.9887	1.762	15.3498	0.436309	1.24258	0.0353198
8.11	164.145	2.91586	68.857	2.00777	11.9689	0.348997	1.14156	0.0332861
8.12	164.353	2.98609	75.0061	2.23975	9.92633	0.29641	0.852813	0.0254658
8.13	164.56	3.02217	77.8615	2.35311	8.60776	0.260142	0.849118	0.0256618
8.14	164.765	3.01312	75.4008	2.27192	10.0665	0.303317	0.838912	0.0252774
8.15	164.97	2.92998	71.0139	2.08069	11.5188	0.3375	1.13923	0.0333792
8.16	165.175	2.87341	67.073	1.92728	13.2829	0.381671	1.14374	0.0328642
8.17	165.375	2.85334	70.228	2.00384	12.1948	0.347959	0.975344	0.0278299
8.18	165.898	1.67967	72.873	1.22403	10.9668	0.184207	0.991537	0.0166546
8.2	166.121	1.82892	77.0765	1.40967	10.0286	0.183416	0.67967	0.0124306
8.22	166.379	1.85887	72.1021	1.34028	12.4884	0.232143	0.742538	0.0138028
8.24	166.626	1.94829	73.0072	1.42239	11.6405	0.22679	0.810886	0.0157984
8.26	166.905	2.14588	78.8303	1.6916	9.00871	0.193316	0.7174	0.0153945
8.28	167.189	2.93157	75.4379	2.21151	10.0157	0.293616	0.860896	0.0252377
8.3	167.689	3.91621	77.0396	3.01703	9.32091	0.365026	0.784686	0.03073
8.32	168.226	3.28378	70.4807	2.31443	12.5732	0.412877	0.924174	0.0303478
8.34	168.587	2.76579	68.1101	1.88378	13.2798	0.367291	0.985475	0.0272562
8.36	169.023	2.89987	38.6924	1.12203	21.4795	0.622878	2.14678	0.0622538
8.38	169.505	3.26232	67.9131	2.21554	13.081	0.426744	0.974224	0.0317823
8.4	169.946	2.94193	50.238	1.47797	19.6511	0.578122	1.41094	0.0415088
8.42	170.388	3.05885	62.8783	1.92336	15.9714	0.488543	1.08737	0.0332612
8.44	170.833	3.08494	70.0949	2.16238	13.0298	0.401962	0.853929	0.0263432
8.46	171.25	2.77248	68.7997	1.90746	13.3857	0.371115	0.966735	0.0268025
8.48	171.621	2.56459	78.0404	2.00141	9.64529	0.247362	0.618363	0.0158585
8.5	171.921	2.18073	78.1422	1.70407	9.73207	0.21223	0.634482	0.0138364
8.52	172.193	1.98388	77.7654	1.54277	9.3815	0.186117	0.661516	0.0131236
8.54	172.441	1.91584	62.1568	1.19083	14.6356	0.280396	1.15992	0.0222223
8.56	172.742	2.56318	54.2771	1.39122	16.9844	0.43534	1.50689	0.0386242
8.58	173.226	3.15115	71.4107	2.25026	12.4706	0.392966	0.701824	0.0221155
8.6	173.595	2.33483	62.8329	1.46704	16.822	0.392766	0.760063	0.0177462
8.62	173.879	1.86735	47.829	0.893133	22.6668	0.423268	1.06834	0.0199497
8.64	174.148	1.8263	54.8427	1.00159	20.7573	0.379091	0.811203	0.014815
8.66	174.405	1.98684	44.3591	0.881342	22.0566	0.438229	1.46643	0.0291356
8.68	174.747	2.25842	21.7175	0.490472	26.2016	0.591741	2.30048	0.0519546
8.7	175.135	2.88364	22.3547	0.644628	27.368	0.789195	2.13644	0.0616071
8.72	175.662	2.95133	14.1678	0.418138	31.7834	0.938035	1.88484	0.0556279
8.74	176.106	2.28797	32.7915	0.75026	27.9704	0.639954	1.40467	0.0321384
8.76	176.378	2.1606	32.4754	0.701665	28.5046	0.615872	1.40822	0.030426
8.78	176.771	3.02067	52.5958	1.58874	18.9774	0.573244	1.34319	0.0405732
8.8	177.267	3.3503	37.9744	1.27226	23.8684	0.799662	1.53214	0.0513315
8.82	177.796	3.55733	47.8854	1.70344	19.2377	0.684349	1.43797	0.0511532
8.84	178.349	3.21349	50.0709	1.60902	20.0339	0.643786	1.18944	0.0382224
8.86	178.748	2.64027	33.9225	0.895646	25.775	0.680528	1.42668	0.0376682
8.88	179.156	3.46628	45.7137	1.58457	24.4193	0.846442	0.979553	0.0339541
8.9	179.775	3.73485	46.3075	1.72951	24.893	0.929714	0.924471	0.0345276
8.92	180.27	2.30221	41.7419	0.960989	25.0106	0.575798	1.29084	0.0297178
8.94	180.481	1.70878	40.3283	0.689123	25.2378	0.43126	1.27711	0.021823
8.96	180.79	2.79863	47.3848	1.32612	21.3694	0.59805	1.40135	0.0392185
8.98	181.319	3.02043	19.1957	0.579793	30.8982	0.933256	1.80682	0.0545737
9	181.746	2.48856	38.1665	0.949794	28.8639	0.718293	0.877976	0.0218489
9.02	182.119	2.63413	39.4767	1.03987	27.0643	0.712907	1.05515	0.027794
9.04	182.552	2.52647	23.022	0.581644	27.0645	0.683776	1.75753	0.0444033
9.06	182.958	2.04295	10.1741	0.207851	29.0856	0.594202	2.1794	0.0445239
9.08	183.234	1.68815	13.5511	0.228763	30.4349	0.513788	1.79504	0.0303031
9.1	183.514	1.7778	27.7436	0.493226	29.4959	0.524379	1.27369	0.0226437
9.12	183.802	2.78439	38.2572	1.06523	25.2482	0.703009	1.17206	0.0326348
9.14	184.366	3.98486	16.9483	0.675365	29.884	1.19083	1.60164	0.0638229
9.16	185.107	3.46596	28.9968	1.00502	26.5006	0.918502	1.67753	0.0581427
9.18	185.465	1.93548	41.3795	0.800889	24.384	0.471946	1.34543	0.0260406
9.2	185.69	1.3134	40.3719	0.530247	25.9972	0.341448	1.11542	0.01465
9.22	185.871	1.02213	37.552	0.383831	27.0816	0.27681	1.19164	0.0121802
9.24	186.003	0.85308	28.7167	0.244976	31.8596	0.271788	1.14092	0.00973292
9.26	186.137	1.05815	28.9656	0.306499	35.1866	0.372327	0.692242	0.00732495
9.28	186.337	1.67623	39.8614	0.66817	26.2049	0.439255	1.20715	0.0202346
9.3	186.641	1.95037	34.3653	0.670251	25.814	0.503468	1.51042	0.0294587
9.32	186.946	2.22528	45.4814	1.01209	22.5627	0.502083	1.35427	0.0301363
9.34	187.315	2.59431	27.8474	0.722447	36.7556	0.953554	0.640134	0.0166071
9.36	187.759	2.97573	49.3444	1.46836	21.4704	0.638902	0.994481	0.029593
9.38	188.204	2.61345	53.4342	1.39648	20.9969	0.548745	0.875305	0.0228757
9.4	188.526	1.84821	61.4875	1.13642	16.7336	0.309273	0.767771	0.0141901
9.42	188.736	1.65246	61.0879	1.00945	16.8556	0.278533	0.855859	0.0141427
9.44	188.992	2.0457	51.3084	1.04962	20.5459	0.420307	1.0042	0.0205429
9.46	189.336	2.21956	29.7951	0.66132	27.5063	0.610518	1.34681	0.0298931
9.48	189.687	2.45866	30.6356	0.753225	29.061	0.714512	1.1525	0.028336
9.5	190.105	2.67527	15.2499	0.407977	30.2791	0.810048	1.53714	0.0411227
9.52	190.569	2.50031	26.2953	0.657464	27.1624	0.679144	1.45247	0.0363161
9.54	190.903	1.67089	10.4922	0.175312	30.9485	0.517114	1.75834	0.0293799
9.56	191.117	1.29259	5.39947	0.0697929	32.8059	0.424044	1.72429	0.022288
9.58	191.332	1.28227	12.9475	0.166022	31.2649	0.400901	1.603	0.0205548
9.6	191.546	1.41701	28.2972	0.400974	30.4262	0.431143	1.17817	0.0166949
9.62	191.777	1.82653	28.624	0.522826	28.4345	0.519364	1.27322	0.0232556
9.64	192.131	2.26866	27.2948	0.619224	28.7085	0.651296	1.25149	0.028392
9.66	192.486	2.49492	22.0207	0.549399	30.7046	0.766057	1.25538	0.0313207
9.68	192.922	2.77911	24.7447	0.687683	26.8697	0.746739	1.70019	0.0472501
9.7	193.375	3.34421	7.20875	0.241076	33.6767	1.12622	1.65238	0.055259
9.72	194.03	3.93523	4.73505	0.186335	38.0759	1.49838	1.29765	0.0510656
9.74	194.687	3.80528	4.67467	0.177885	41.7912	1.59027	1.04588	0.0397987
9.76	195.276	3.22297	5.12696	0.165241	30.625	0.987036	2.02992	0.0654239
9.78	195.76	3.16922	5.46135	0.173082	28.1571	0.892359	1.98954	0.0630529
9.8	196.328	4.01415	46.4745	1.86556	20.2334	0.812199	1.32866	0.0533346
9.82	196.963	3.88558	11.2358	0.436576	27.3596	1.06308	2.01559	0.0783172
9.84	197.591	4.23493	53.2078	2.25331	19.3611	0.819928	0.947371	0.0401205
9.86	198.2	3.99226	26.7014	1.06599	28.5666	1.14045	1.44419	0.0576559
9.88	198.809	3.71878	11.097	0.412672	28.5048	1.06003	2.09527	0.0779184
9.9	199.417	4.12191	15.9889	0.65905	30.7912	1.26919	1.75915	0.0725106
9.92	200.118	3.55545	47.8685	1.70194	23.2468	0.826529	0.921625	0.0327679
9.94	200.546	2.4449	13.0752	0.319675	45.2141	1.10544	0.365917	0.00894631
9.96	200.93	2.70812	8.73216	0.236478	40.3124	1.09171	1.16873	0.0316505
9.98	201.461	3.37491	9.413	0.317681	44.6421	1.50663	0.631681	0.0213187
10	202.048	3.86548	48.4059	1.87112	20.1482	0.778823	1.21788	0.0470769
10.02	202.635	3.96317	54.1179	2.14478	19.7525	0.782826	1.01916	0.040391
10.04	203.222	3.87648	36.4931	1.41465	26.4043	1.02356	1.19599	0.0463625
10.06	203.809	3.59512	24.7478	0.889711	25.5611	0.91895	1.66659	0.0599159
10.08	204.396	3.63419	36.8052	1.33757	23.548	0.855777	1.43627	0.0521967
10.1	204.974	3.84937	60.4252	2.32599	18.3339	0.705739	0.763547	0.0293918
10.12	205.506	3.50808	39.3704	1.38114	31.1023	1.09109	0.61084	0.0214287
10.14	206.038	3.24649	33.6535	1.09255	32.4613	1.05385	0.874914	0.028404
10.16	206.513	3.16173	31.2754	0.988842	35.5823	1.12502	0.589007	0.0186228
10.18	206.986	3.02216	45.0271	1.36079	27.2943	0.824875	0.735451	0.0222265
10.2	207.447	2.92966	25.0894	0.735033	39.3526	1.15289	0.43093	0.0126248
10.22	207.897	3.04825	18.315	0.558288	41.9205	1.27784	0.537927	0.0163974
10.24	208.399	3.62652	15.5661	0.564509	44.5529	1.61572	0.3804	0.0137953
10.26	209.066	4.55878	43.6585	1.9903	28.0525	1.27885	0.777551	0.0354469
10.28	209.738	4.27814	39.3646	1.68408	30.6532	1.31139	0.628231	0.0268766
10.3	210.39	3.9116	18.4665	0.722335	42.9784	1.68114	0.412679	0.0161423
10.32	211.03	3.97553	14.5196	0.57723	45.5617	1.81132	0.311724	0.0123927
10.34	211.67	3.93903	11.368	0.44779	41.2508	1.62488	1.03631	0.0408205
10.36	212.311	3.99142	38.9867	1.55612	29.1341	1.16286	0.855584	0.03415
10.38	212.835	3.03532	17.4679	0.530206	43.3258	1.31508	0.423936	0.0128678
10.4	213.296	3.14409	52.0098	1.63524	20.573	0.646835	1.23742	0.0389057
10.42	213.781	3.17775	20.7763	0.66022	41.3043	1.31255	0.496368	0.0157734
10.44	214.293	3.22803	18.5422	0.598548	42.6216	1.37584	0.46035	0.0148602
10.46	214.806	3.59328	47.5213	1.70757	25.8496	0.928848	0.6304	0.022652
10.48	215.318	3.10318	8.44284	0.261996	48.7997	1.51434	0.246688	0.00765517
10.5	215.83	3.12626	7.95197	0.2486	49.0042	1.532	0.257783	0.00805898
10.52	216.342	2.92776	15.6087	0.456986	45.2046	1.32349	0.395868	0.0115901
10.54	216.854	3.00657	10.0454	0.302023	48.2302	1.45007	0.281823	0.0084732
10.56	217.367	3.13451	15.1921	0.476199	44.6359	1.39912	0.456289	0.0143024
10.58	217.879	3.60786	38.6329	1.39382	30.413	1.09726	0.65129	0.0234976
10.6	218.438	3.39589	14.5044	0.492553	43.4321	1.47491	0.558947	0.0189812
10.62	219.002	3.39252	9.93761	0.337135	37.5032	1.2723	1.45727	0.049438
10.64	219.566	3.37757	10.2268	0.345417	30.5179	1.03076	2.04701	0.0691391
10.66	220.13	3.17889	24.6493	0.783574	24.5248	0.779616	1.84649	0.0586978
10.68	220.602	2.6252	23.5143	0.617298	22.9417	0.602265	1.91125	0.0501741
10.7	220.985	2.60081	14.9825	0.389667	23.8795	0.621059	2.236	0.0581541
10.72	221.46	3.59723	55.9926	2.01418	16.5093	0.593876	1.2944	0.0465626
10.74	222.042	3.51128	35.5229	1.24731	22.3208	0.783745	1.82757	0.064171
10.76	222.571	3.27996	64.2011	2.10577	14.908	0.488976	1.00549	0.0329796
10.78	222.981	3.10186	71.5837	2.22043	12.7055	0.394106	0.79272	0.0245891
10.8	223.415	3.36266	58.7789	1.97654	16.3231	0.548891	1.37089	0.0460986
10.82	223.964	3.50291	48.7765	1.7086	21.0666	0.737945	1.23793	0.0433635
10.84	224.473	2.48019	52.1168	1.2926	21.5609	0.534753	0.845565	0.0209716
10.86	224.694	1.37583	31.4438	0.432613	27.1705	0.37382	1.4092	0.0193882
10.88	224.906	1.8246	34.5957	0.631234	25.2783	0.461228	1.47271	0.026871
10.9	225.267	2.55512	52.2653	1.33544	18.7671	0.479521	1.27952	0.0326933
10.92	225.646	3.36781	65.5872	2.20885	14.9562	0.503696	0.922817	0.0310788
10.94	226.207	4.04811	62.2295	2.51912	18.0979	0.732623	0.777418	0.0314708
10.96	226.777	3.54351	52.5481	1.86205	21.74	0.770359	1.27838	0.0452995
10.98	227.275	3.15367	45.6567	1.43986	26.7061	0.842221	0.824801	0.0260115
11	227.735	3.03963	52.3186	1.59029	20.9046	0.635425	1.60917	0.0489129
11.02	228.227	3.28583	38.3796	1.26109	30.2334	0.99342	1.08783	0.0357443
11.04	228.741	3.17191	20.2956	0.643758	40.3491	1.27984	0.844357	0.0267823
11.06	229.255	2.98793	11.279	0.337008	46.2645	1.38235	0.547635	0.0163629
11.08	229.77	3.03777	19.4985	0.59232	42.7856	1.29973	0.51647	0.0156892
11.1	230.243	2.91463	34.4433	1.0039	31.7438	0.925214	1.39804	0.0407478
11.12	230.654	2.7599	14.7725	0.407708	37.975	1.04807	0.932559	0.0257378
11.14	231.139	4.0982	43.2777	1.77361	24.4092	1.00034	1.26156	0.0517014
11.16	231.9	5.03384	46.9948	2.36564	23.0939	1.16251	1.31027	0.0659567
11.18	232.649	3.75093	19.3812	0.726976	31.7149	1.1896	1.89968	0.0712556
11.2	233.107	3.02675	48.2606	1.46073	21.9924	0.665654	1.33605	0.0404389
11.22	233.549	2.62944	63.682	1.67448	16.5356	0.434792	0.88384	0.02324
11.24	233.836	2.08287	69.5642	1.44893	14.1563	0.294859	0.707299	0.0147321
11.26	234.109	2.03155	67.627	1.37388	14.3616	0.291763	0.940729	0.0191114
11.28	234.39	2.36437	75.8489	1.79335	10.7253	0.253586	0.68551	0.016208
11.3	234.722	2.44205	67.3727	1.64528	14.6574	0.35794	0.828048	0.0202214
11.32	235.055	2.54562	65.6946	1.67233	14.2947	0.363887	0.499152	0.0127065
11.34	235.418	2.81301	62.1968	1.74961	16.3563	0.460104	0.51142	0.0143863
11.36	235.848	3.10063	61.4702	1.90597	17.347	0.537868	0.436703	0.0135406
11.38	236.277	2.94814	46.0517	1.35767	28.2324	0.832331	0.261992	0.00772389
11.4	236.711	2.89371	42.9438	1.24267	30.1683	0.872983	0.231422	0.00669669
11.42	237.159	2.9211	41.89	1.22365	30.6026	0.893933	0.265624	0.00775914
11.44	237.582	2.60986	25.0135	0.652818	39.1898	1.0228	0.21053	0.00549454
11.46	237.978	2.07812	39.9697	0.830619	31.3801	0.652118	0.282286	0.00586625
11.48	238.259	2.02756	63.7025	1.29161	17.8403	0.361722	0.307122	0.00622708
11.5	238.539	2.20799	78.1954	1.72654	9.86026	0.217714	0.35987	0.00794589
11.52	238.819	2.20135	82.2283	1.81013	7.56569	0.166547	0.310655	0.00683861
11.54	239.099	2.34806	86.1909	2.02381	6.02045	0.141363	0.256107	0.00601353
11.56	239.381	2.88	85.3375	2.45772	6.39196	0.184089	0.284587	0.00819611
11.58	239.794	3.76452	77.981	2.93561	10.618	0.399717	0.271656	0.0102265
11.6	240.322	4.71264	72.7236	3.4272	13.5774	0.639855	0.281122	0.0132482
11.62	241.026	5.47891	73.5795	4.03136	13.2028	0.723368	0.250988	0.0137514
11.64	241.747	5.38793	83.7672	4.51332	7.05795	0.380277	0.2646	0.0142565
11.66	242.331	4.70204	83.5274	3.92749	7.16579	0.336939	0.315459	0.014833
11.68	242.907	5.46241	78.1332	4.26796	9.97031	0.54462	0.32952	0.0179997
11.7	243.7	5.90727	81.8157	4.83308	8.23019	0.48618	0.317417	0.0187507
11.72	244.394	4.48544	63.1915	2.83441	17.173	0.770283	0.457065	0.0205014
11.74	244.944	4.93626	78.9686	3.89809	9.84616	0.486032	0.310936	0.0153486
11.76	245.637	5.52464	70.02	3.86835	12.8279	0.708697	0.537071	0.0296712
11.78	246.426	6.52644	82.0814	5.357	8.13059	0.530638	0.322895	0.0210735
11.8	247.332	6.84021	77.572	5.30609	10.5513	0.721728	0.386618	0.0264455
11.82	248.242	6.16672	76.0425	4.68933	11.1326	0.686517	0.348936	0.0215179
11.84	248.964	4.82562	72.8362	3.5148	12.9495	0.624895	0.38098	0.0183846
11.86	249.528	3.7043	76.6791	2.84042	10.9747	0.406536	0.352138	0.0130442
11.88	249.916	3.93402	71.8415	2.82626	13.7771	0.541993	0.330203	0.0129903
11.9	250.561	5.50073	73.9844	4.06968	12.411	0.682694	0.351336	0.019326
11.92	251.342	6.76671	77.7255	5.25946	10.7645	0.728403	0.313929	0.0212427
11.94	252.332	7.45888	75.2295	5.61128	11.9233	0.889344	0.298479	0.0222632
11.96	253.256	6.61172	75.1151	4.9664	11.7383	0.776105	0.353098	0.0233458
11.98	254.017	6.30642	78.6768	4.96169	9.50346	0.599329	0.359191	0.0226521
12	254.903	6.83836	68.9477	4.71489	14.4226	0.986269	0.437919	0.0299464
12.02	255.926	8.82728	77.7943	6.86712	9.45128	0.834291	0.420744	0.0371403
12.04	257.216	10.2965	82.9564	8.54158	7.33311	0.755051	0.332899	0.0342768
12.06	258.511	9.96258	74.8823	7.46021	12.0413	1.19962	0.341006	0.033973
12.08	259.806	9.56538	77.776	7.43957	9.90245	0.947207	0.345704	0.0330679
12.1	261.098	8.88285	76.9623	6.83644	10.3497	0.919345	0.351403	0.0312146
12.12	262.324	9.34589	76.8458	7.18192	10.7859	1.00804	0.356807	0.0333468
12.14	263.55	10.6559	82.7687	8.81972	7.64023	0.814132	0.298857	0.0318458
12.16	264.905	11.0511	81.8529	9.04565	8.46381	0.935345	0.295601	0.0326671
12.18	266.26	9.77624	45.2613	4.42485	28.8866	2.82403	0.271009	0.0264945
12.2	267.616	8.93694	49.2741	4.4036	26.2283	2.344	0.309342	0.0276457
12.22	268.971	10.0464	54.8242	5.50786	22.9362	2.30426	0.320521	0.0322008
12.24	270.326	10.6831	77.7625	8.30742	10.1493	1.08426	0.373029	0.0398509
12.26	271.681	9.45969	71.5319	6.7667	12.924	1.22257	0.434459	0.0410985
12.28	272.77	5.89486	80.1645	4.72558	9.33314	0.550175	0.312965	0.0184488
12.3	273.215	3.63532	86.0394	3.12781	6.35527	0.231034	0.275462	0.0100139
12.32	273.662	4.06621	85.9132	3.49341	6.13694	0.249541	0.268258	0.0109079
12.34	274.189	4.52034	89.3197	4.03755	4.72733	0.213691	0.230673	0.0104272
12.36	274.715	3.7765	88.2009	3.33091	4.8003	0.181284	0.294918	0.0111376
12.38	275.11	3.24259	89.5263	2.90297	4.27293	0.138554	0.255746	0.00829277
12.4	275.541	5.6297	89.3856	5.03214	4.69113	0.264097	0.237832	0.0133892
12.42	276.45	6.41475	90.7682	5.82256	3.95944	0.253988	0.221935	0.0142366
12.44	277.101	4.22016	90.2942	3.81056	4.13716	0.174595	0.225397	0.0095121
12.46	277.416	3.29516	90.0729	2.96805	4.26231	0.14045	0.227586	0.00749933
12.48	277.858	4.04867	86.9411	3.51995	5.79658	0.234684	0.259616	0.010511
12.5	278.387	4.3883	84.5688	3.71114	6.96526	0.305657	0.304292	0.0133533
12.52	278.92	4.27352	80.226	3.42848	9.41661	0.402421	0.293156	0.0125281
12.54	279.454	4.02915	75.1365	3.02736	12.1991	0.491521	0.310206	0.0124987
12.56	279.973	4.14274	78.8955	3.26843	9.97976	0.413435	0.33908	0.0140472
12.58	280.488	5.18033	88.402	4.57952	4.84427	0.250949	0.271774	0.0140788
12.6	281.198	6.0545	88.6776	5.36898	4.83579	0.292783	0.275173	0.0166603
12.62	281.915	6.08624	88.6898	5.39787	4.85704	0.295611	0.27254	0.0165874
12.64	282.633	5.24739	55.5922	2.91714	22.92	1.2027	0.32398	0.0170005
12.66	283.281	3.73375	40.2873	1.50423	31.2891	1.16826	0.280223	0.0104628
12.68	283.736	3.99992	82.3159	3.29257	8.02651	0.321054	0.300269	0.0120105
12.7	284.368	4.85979	76.3054	3.70828	9.5144	0.462379	0.591734	0.028757
12.72	285.12	4.70453	75.9459	3.57289	10.7098	0.503848	0.479887	0.0225764
12.74	285.663	4.19625	80.0135	3.35756	8.91595	0.374135	0.346475	0.0145389
12.76	286.178	3.86473	81.455	3.14802	8.22632	0.317925	0.359942	0.0139108
12.78	286.719	4.55032	78.5765	3.57548	9.72993	0.442743	0.368995	0.0167904
12.8	287.397	5.67975	84.6396	4.80732	6.62263	0.376149	0.348505	0.0197942
12.82	288.136	4.50807	70.4979	3.17809	12.1806	0.549108	0.656681	0.0296036
12.84	288.655	3.21058	64.9612	2.08563	10.774	0.345907	1.09002	0.0349959
12.86	289.089	3.77977	76.4514	2.88969	9.64097	0.364407	0.505261	0.0190977
12.88	289.684	4.58491	83.7249	3.83871	6.8092	0.312196	0.352107	0.0161438
12.9	290.266	4.13626	81.6974	3.37921	7.49063	0.309832	0.377713	0.0156232
12.92	290.752	3.56568	65.3696	2.33087	15.0662	0.53721	0.57836	0.0206225
12.94	291.224	3.42427	72.456	2.48109	12.0078	0.411178	0.471214	0.0161356
12.96	291.649	3.27106	79.2115	2.59106	9.34183	0.305577	0.333654	0.010914
12.98	292.034	3.92014	83.356	3.26767	7.5128	0.294512	0.270331	0.0105974
13	292.597	4.6362	79.2071	3.6722	9.49447	0.440182	0.320379	0.0148534
13.02	293.161	4.42064	72.7485	3.21595	12.6679	0.560003	0.396076	0.0175091
13.04	293.704	4.3309	73.6075	3.18787	12.7294	0.551296	0.363034	0.0157226
13.06	294.244	3.91755	79.7712	3.12508	8.90111	0.348706	0.36725	0.0143872
13.08	294.655	3.2935	74.9114	2.46721	11.3535	0.373927	0.427377	0.0140757
13.1	295.06	2.82395	74.2072	2.09558	11.7072	0.330605	0.414733	0.0117119
13.12	295.353	2.41247	72.0303	1.73771	13.3798	0.322783	0.335182	0.00808616
13.14	295.662	4.14129	76.4384	3.16553	10.5209	0.435702	0.401091	0.0166103
13.16	296.384	5.42492	84.085	4.56154	7.02816	0.381272	0.322374	0.0174885
13.18	297.109	5.14594	81.3841	4.18797	8.11683	0.417687	0.361498	0.0186025
13.2	297.708	3.94956	80.5611	3.18181	8.56757	0.338381	0.375451	0.0148287
13.22	298.135	3.31524	74.7538	2.47827	11.3106	0.374973	0.48751	0.0161621
13.24	298.598	4.11094	69.0227	2.83749	14.1209	0.580501	0.515159	0.0211779
13.26	299.308	5.70191	85.7697	4.89051	5.99868	0.342039	0.330424	0.0188404
13.28	300.018	4.40448	85.0819	3.74741	6.4681	0.284886	0.325313	0.0143283
13.3	300.415	2.95781	81.3135	2.4051	7.38584	0.218459	0.397292	0.0117511
13.32	300.787	3.12262	77.2517	2.41227	9.68156	0.302318	0.477312	0.0149046
13.34	301.213	3.42124	70.9534	2.42749	12.3992	0.424207	0.509422	0.0174285
13.36	301.721	4.08718	78.7026	3.21672	9.67836	0.395572	0.343233	0.0140286
13.38	302.28	4.58838	78.6972	3.61093	10.1986	0.46795	0.313124	0.0143673
13.4	302.877	5.37813	79.6993	4.28633	8.95977	0.481868	0.365054	0.019633
13.42	303.646	6.03485	78.8017	4.75556	9.70095	0.585438	0.418963	0.0252838
13.44	304.496	5.21725	85.5702	4.46441	6.13654	0.320159	0.385846	0.0201306
13.46	304.949	3.69117	83.6216	3.08662	7.39269	0.272877	0.325279	0.0120066
13.48	305.418	4.91479	84.1059	4.13362	7.19585	0.353661	0.373811	0.018372
13.5	306.16	5.3427	78.6586	4.20249	9.49879	0.507492	0.353488	0.0188858
13.52	306.855	4.39103	69.8827	3.06857	15.0295	0.659952	0.344288	0.0151178
13.54	307.359	4.08469	77.3133	3.15801	10.6827	0.436356	0.340495	0.0139082
13.56	307.896	4.70527	77.6021	3.65139	10.6363	0.500465	0.338355	0.0159205
13.58	308.552	5.29777	80.2973	4.25396	9.22105	0.48851	0.289478	0.0153359
13.6	309.213	4.9645	77.0503	3.82517	10.0092	0.496907	0.455508	0.0226137
13.62	309.884	5.8695	73.6304	4.32174	11.2389	0.659665	0.473449	0.0277891
13.64	310.802	7.86416	88.0879	6.92737	4.85768	0.382016	0.304952	0.0239819
13.66	311.803	7.22791	84.1415	6.08167	5.73208	0.41431	0.486264	0.0351467
13.68	312.692	6.82742	88.1677	6.01958	4.59001	0.31338	0.402494	0.0274799
13.7	313.543	6.55107	86.9501	5.69616	4.56068	0.298773	0.538739	0.0352932
13.72	314.362	6.42259	85.4997	5.49129	5.2922	0.339896	0.55359	0.0355548
13.74	315.151	4.72779	85.0261	4.01986	5.22219	0.246895	0.585257	0.0276697
13.76	315.628	4.13056	82.986	3.42778	7.34082	0.303217	0.40071	0.0165515
13.78	316.196	4.6805	84.484	3.95428	6.45088	0.301934	0.371029	0.017366
13.8	316.845	4.38876	69.7268	3.06015	13.7459	0.603276	0.474831	0.0208392
13.82	317.417	3.50131	47.9875	1.68019	24.4462	0.855935	0.536661	0.0187901
13.84	317.953	3.21154	76.0956	2.44384	9.50884	0.30538	0.624629	0.0200602
13.86	318.355	3.10048	87.3946	2.70965	5.39424	0.167247	0.280984	0.00871185
13.88	318.696	2.60223	89.3139	2.32415	4.15517	0.108127	0.32229	0.00838673
13.9	318.993	2.86779	82.5249	2.36664	7.49385	0.214908	0.381709	0.0109466
13.92	319.408	3.65873	80.3588	2.94011	7.49661	0.27428	0.426006	0.0155864
13.94	319.916	3.86682	51.3984	1.98749	21.3129	0.824131	1.04049	0.0402337
13.96	320.574	3.79208	40.4317	1.5332	25.69	0.974185	1.17007	0.0443698
13.98	321.083	3.80987	77.5658	2.95516	10.6949	0.407461	0.418173	0.0159318
14	321.488	3.37768	73.7985	2.49268	9.52375	0.321682	1.01856	0.0344037
14.02	321.989	3.27947	76.0113	2.49277	9.69401	0.317913	0.623733	0.0204552
14.04	322.343	1.8998	63.1249	1.19925	13.1607	0.250027	1.101	0.0209169
14.06	322.525	1.37646	71.0277	0.97767	10.9779	0.151106	0.823009	0.0113284
14.08	322.708	1.87412	72.4765	1.3583	12.0276	0.225411	0.631432	0.0118338
14.1	323.005	2.3782	72.5331	1.72498	12.1004	0.287772	0.535627	0.0127383
14.12	323.337	2.74107	68.7717	1.88508	14.4565	0.396263	0.505987	0.0138695
14.14	323.722	3.36358	75.1399	2.52739	10.923	0.367403	0.470577	0.0158282
14.16	324.197	3.10903	37.6258	1.1698	31.9225	0.992479	0.493555	0.0153448
14.18	324.67	3.04806	79.4196	2.42076	7.57605	0.230922	0.571378	0.0174159
14.2	325	2.48888	79.3394	1.97466	8.82613	0.219672	0.473305	0.01178
14.22	325.323	2.66377	76.6478	2.04172	9.50518	0.253196	0.549057	0.0146256
14.24	325.698	2.60137	49.7346	1.29378	25.0228	0.650935	0.426975	0.0111072
14.26	326.117	3.19881	82.1991	2.62939	7.08493	0.226633	0.435578	0.0139333
14.28	326.501	2.56864	79.5985	2.0446	6.7053	0.172235	0.823209	0.0211453
14.3	326.795	2.41401	69.72	1.68305	12.8261	0.309623	0.642721	0.0155154
14.32	327.184	3.44566	78.1911	2.6942	9.43229	0.325005	0.444657	0.0153214
14.34	327.704	3.6697	44.6611	1.63893	26.1924	0.961183	0.689831	0.0253147
14.36	328.255	3.91804	58.8337	2.30513	19.5565	0.766233	0.501914	0.0196652
14.38	328.84	3.8081	72.4931	2.76061	9.28919	0.353742	1.11444	0.0424388
14.4	329.295	3.29804	86.4712	2.85186	5.49091	0.181093	0.349206	0.011517
14.42	329.656	2.76719	78.9431	2.18451	9.62724	0.266404	0.353844	0.00979156
14.44	329.984	2.5771	83.6494	2.15573	7.12917	0.183726	0.356278	0.00918167
14.46	330.301	3.46425	83.32	2.88641	6.48012	0.224487	0.464387	0.0160875
14.48	330.866	4.96104	87.9271	4.3621	5.15837	0.255909	0.331377	0.0164397
14.5	331.478	4.72058	84.9585	4.01053	6.18785	0.292102	0.376708	0.0177828
14.52	331.995	4.21535	85.455	3.60223	5.76733	0.243113	0.326779	0.0137749
14.54	332.468	2.78389	83.5112	2.32486	6.90823	0.192318	0.368012	0.0102451
14.56	332.642	1.44212	80.6507	1.16308	8.09695	0.116768	0.471963	0.00680629
14.58	332.814	1.58778	80.2235	1.27377	8.32614	0.132201	0.474972	0.00754151
14.6	333.019	2.20758	81.8603	1.80713	7.7036	0.170063	0.376023	0.00830101
14.62	333.336	2.68286	84.4173	2.2648	6.31948	0.169543	0.349141	0.00936696
14.64	333.652	2.71776	86.4119	2.34847	5.46403	0.148499	0.32729	0.00889494
14.66	333.973	2.61898	87.437	2.28995	4.85946	0.127268	0.350697	0.00918467
14.68	334.3	2.71399	87.7389	2.38123	5.30927	0.144093	0.287534	0.00780366
14.7	334.627	2.23104	81.7609	1.82412	5.81255	0.12968	0.726735	0.0162137
14.72	334.888	1.94546	84.2538	1.63912	5.54803	0.107934	0.50341	0.00979363
14.74	335.121	1.88606	86.3032	1.62773	5.1635	0.0973868	0.390957	0.0073737
14.76	335.355	1.90168	79.7571	1.51673	7.39095	0.140552	0.641132	0.0121923
14.78	335.619	2.26236	87.3428	1.97601	5.20684	0.117798	0.319752	0.00723395
14.8	335.9	2.2161	82.3522	1.82501	6.36694	0.141098	0.572112	0.0126786
14.82	336.183	2.3331	85.6819	1.99904	5.48622	0.127999	0.411797	0.00960763
14.84	336.472	2.36502	82.704	1.95597	7.39881	0.174983	0.435167	0.0102918
14.86	336.76	2.52888	81.9541	2.07252	7.05145	0.178323	0.522218	0.0132063
14.88	337.096	3.02454	81.295	2.4588	7.62474	0.230613	0.498494	0.0150771
14.9	337.497	3.30772	86.1289	2.8489	5.42181	0.179338	0.356124	0.0117796
14.92	337.898	3.03059	85.1149	2.57948	5.98728	0.18145	0.484869	0.0146944
14.94	338.222	1.96538	85.2209	1.67492	6.39719	0.125729	0.356113	0.00699898
14.96	338.371	1.27222	87.3536	1.11133	5.63254	0.0716581	0.279195	0.00355197
14.98	338.523	1.89704	87.9631	1.6687	4.80533	0.091159	0.337861	0.00640936
15	338.81	2.59255	88.8609	2.30377	4.51342	0.117013	0.307747	0.00797849
15.02	339.124	2.72718	89.3021	2.43543	4.15628	0.113349	0.323115	0.00881192
15.04	339.473	3.16444	87.8575	2.7802	5.08634	0.160954	0.290766	0.0092011
15.06	339.864	3.34798	79.7969	2.67158	7.75251	0.259552	0.557452	0.0186633
15.08	340.255	2.91894	65.9518	1.92509	14.5718	0.425343	0.764772	0.0223232
15.1	340.646	3.08425	72.2765	2.22919	12.2055	0.376449	0.527133	0.0162581
15.12	341.038	3.26128	73.9791	2.41266	12.8775	0.419971	0.258771	0.00843923
15.14	341.431	3.34502	79.8737	2.67179	7.99433	0.267412	0.507933	0.0169904
15.16	341.849	3.73943	87.6734	3.27848	5.14961	0.192566	0.296379	0.0110829
15.18	342.284	3.3473	81.5411	2.72943	7.63083	0.255427	0.417376	0.0139708
15.2	342.647	2.81626	83.5596	2.35326	6.92165	0.194932	0.41529	0.0116957
15.22	342.979	2.47221	79.8293	1.97355	8.32604	0.205837	0.505401	0.0124946
15.24	343.27	2.33946	81.7734	1.91306	7.71733	0.180544	0.415998	0.00973212
15.26	343.531	3.20659	83.2389	2.66913	7.33181	0.235101	0.334542	0.0107274
15.28	344.021	4.41505	78.4209	3.46232	10.0476	0.443606	0.364809	0.0161065
15.3	344.597	3.90946	75.8883	2.96682	10.6344	0.415749	0.407073	0.0159144
15.32	344.968	2.61907	70.0842	1.83556	13.7455	0.360005	0.439945	0.0115225
15.34	345.242	5.08866	81.0869	4.12623	8.47123	0.431072	0.282493	0.0143751
15.36	346.277	5.07092	76.0572	3.8568	10.915	0.553492	0.423281	0.0214642
15.38	346.531	1.91201	73.1676	1.39897	12.7588	0.243949	0.388315	0.00742462
15.4	346.77	1.77966	70.1062	1.24765	13.596	0.241963	0.506463	0.00901333
15.42	347.014	2.55732	71.2659	1.8225	12.7753	0.326704	0.541479	0.0138473
15.44	347.453	3.36461	72.2838	2.43207	12.4267	0.418109	0.548689	0.0184612
15.46	347.893	3.11958	68.794	2.14609	15.2538	0.475855	0.368314	0.0114899
15.48	348.242	3.29088	72.0623	2.37149	13.3196	0.438333	0.356285	0.0117249
15.5	348.713	3.82184	71.1885	2.72071	14.1134	0.539391	0.310932	0.0118833
15.52	349.22	3.98903	71.1892	2.83976	13.9158	0.555104	0.370098	0.0147633
15.54	349.697	3.81598	75.1748	2.86866	11.0856	0.423026	0.392589	0.0149811
15.56	350.165	3.78921	66.408	2.51634	13.492	0.51124	0.678658	0.0257158
15.58	350.698	2.39341	55.3667	1.32515	14.6976	0.351774	1.15706	0.0276933
15.6	350.877	6.39246	65.2263	4.16956	13.0097	0.831643	0.797146	0.0509572
15.62	352.567	9.25337	78.3997	7.25461	7.84086	0.725544	0.676733	0.0626206
15.64	353.27	4.53417	73.9494	3.35299	9.77129	0.443047	0.710452	0.0322131
15.66	353.788	3.96397	79.2589	3.1418	8.9438	0.354529	0.399175	0.0158232
15.68	354.265	3.73885	80.2048	2.99874	7.98877	0.298688	0.455999	0.0170491
15.7	354.74	3.76772	71.5601	2.69619	9.9676	0.375551	0.89712	0.033801
15.72	355.282	5.03548	82.0441	4.13132	7.12442	0.358749	0.46517	0.0234236
15.74	356.012	4.61842	78.956	3.64652	8.25588	0.381291	0.554807	0.0256233
15.76	356.423	3.47763	74.8004	2.60128	9.20752	0.320204	0.626474	0.0217865
15.78	356.899	2.62886	81.0588	2.13092	7.69354	0.202252	0.378381	0.00994712
15.8	357.104	0.939698	80.1975	0.753615	8.4435	0.0793434	0.408702	0.00384056
15.82	357.134	0.197272	80.4745	0.158754	8.3433	0.016459	0.404424	0.000797816
15.84	357.155	0.16299	80.9992	0.13202	8.10132	0.0132043	0.402287	0.000655687
15.86	357.175	0.169362	81.5969	0.138194	7.82118	0.0132461	0.399177	0.000676055
15.88	357.197	0.479121	82.1159	0.393435	7.56795	0.0362597	0.394032	0.00188789
15.9	357.3	1.40668	83.0647	1.16845	7.21838	0.101539	0.378823	0.00532882
15.92	357.55	1.9467	80.3686	1.56453	8.29315	0.161442	0.37897	0.0073774
15.94	357.809	2.09407	78.7786	1.64968	7.73376	0.16195	0.511253	0.010706
15.96	358.058	2.70563	77.7175	2.10275	7.5062	0.20309	0.694235	0.0187834
15.98	358.448	3.43541	79.8894	2.74452	8.27712	0.284352	0.459203	0.0157755
16	358.932	3.12787	77.5398	2.42535	10.4258	0.326106	0.390266	0.012207
16.02	359.304	2.68502	83.7361	2.24833	6.60583	0.177368	0.360901	0.00969026
16.04	359.61	2.37686	83.2335	1.97834	7.28634	0.173186	0.3545	0.00842596
16.06	359.891	2.6895	74.5938	2.0062	9.31825	0.250614	0.69143	0.018596
16.08	360.25	2.87121	66.7021	1.91516	11.4514	0.328793	0.890792	0.0255765
16.1	360.573	2.51778	77.7531	1.95765	8.46498	0.213129	0.49194	0.012386
16.12	360.862	2.37507	78.0415	1.85354	8.35637	0.19847	0.492059	0.0116867
16.14	361.152	2.2219	78.3298	1.74041	8.24777	0.183257	0.492177	0.0109357
16.16	361.441	2.46044	78.6182	1.93435	8.13917	0.200259	0.492295	0.0121126
16.18	361.731	2.48942	78.9065	1.96431	8.03056	0.199914	0.492413	0.0122582
16.2	362.021	2.10001	79.1949	1.6631	7.92196	0.166362	0.492532	0.0103432
16.22	362.22	1.74519	78.9107	1.37714	8.10752	0.141492	0.534073	0.00932059
16.24	362.462	2.1774	78.2067	1.70288	8.93849	0.194627	0.444457	0.00967762
16.26	362.762	2.44612	81.6293	1.99675	8.10589	0.19828	0.312977	0.00765579
16.28	363.077	2.20474	80.7173	1.77961	8.42515	0.185753	0.355946	0.00784768
16.3	363.366	2.24874	73.4873	1.65254	12.262	0.275741	0.393535	0.00884958
16.32	363.637	2.79465	71.4833	1.99771	12.8259	0.358439	0.443947	0.0124068
16.34	364.047	3.55695	70.0066	2.4901	12.6848	0.451191	0.554465	0.019722
16.36	364.471	4.07638	64.4243	2.62618	13.9348	0.568036	0.683294	0.0278536
16.38	365.084	3.69829	82.9424	3.06745	6.92342	0.256048	0.368282	0.0136201
16.4	365.561	3.37942	84.7028	2.86246	5.9209	0.200092	0.385632	0.0130321
16.42	365.944	3.15476	68.1978	2.15148	13.0193	0.410728	0.645997	0.0203796
16.44	366.369	2.68468	57.966	1.5562	14.4942	0.389124	0.943945	0.0253419
16.46	366.649	3.62491	61.446	2.22736	14.1683	0.513589	0.872537	0.0316287
16.48	367.377	3.90638	77.7883	3.03871	9.3298	0.364457	0.498472	0.0194722
16.5	367.593	2.39299	68.5979	1.64154	11.5493	0.276372	0.908925	0.0217505
16.52	367.955	2.78797	62.0192	1.72908	15.4168	0.429815	0.724107	0.0201879
16.54	368.348	2.93064	82.469	2.41687	7.18777	0.210648	0.366282	0.0107344
16.56	368.701	2.80489	81.7297	2.29243	7.54845	0.211726	0.380124	0.0106621
16.58	369.087	2.7507	80.5283	2.21509	7.94707	0.2186	0.434058	0.0119396
16.6	369.461	3.0388	72.3277	2.1979	10.5434	0.320394	0.593963	0.0180494
16.62	369.846	2.69962	81.5575	2.20175	7.12433	0.19233	0.501243	0.0135317
16.64	370.138	2.17518	70.9756	1.54385	10.7429	0.233677	0.697434	0.0151705
16.66	370.39	4.31193	60.9415	2.62775	13.4954	0.581911	0.96421	0.041576
16.68	371.292	4.65957	81.6647	3.80522	7.05208	0.328596	0.504423	0.0235039
16.7	371.552	2.07504	78.4552	1.62798	8.25945	0.171387	0.548802	0.0113879
16.72	371.827	2.10221	60.6731	1.27548	11.9817	0.25188	1.16546	0.0245004
16.74	372.112	2.33581	38.7023	0.90401	19.4813	0.455045	1.43749	0.033577
16.76	372.429	2.4014	74.0082	1.77724	11.7919	0.283171	0.361612	0.00868376
16.78	372.76	3.01899	75.3741	2.27553	11.07	0.334202	0.376002	0.0113514
16.8	373.213	3.00848	71.2305	2.14296	11.5884	0.348635	0.592249	0.0178177
16.82	373.58	2.58748	74.7098	1.9331	9.60473	0.24852	0.523299	0.0135403
16.84	373.868	2.43248	66.8982	1.62729	10.624	0.258427	0.853173	0.0207533
16.86	374.205	2.50923	69.0457	1.73252	13.3199	0.334228	0.589926	0.0148026
16.88	374.555	2.30723	69.7483	1.60925	10.1268	0.233647	0.875842	0.0202077
16.9	374.894	2.2318	70.9711	1.58393	11.1045	0.247831	0.518484	0.0115715
16.92	375.232	2.07308	68.8621	1.42757	11.9027	0.246752	0.59239	0.0122807
16.94	375.528	2.39307	64.1713	1.53567	12.8702	0.307993	0.783871	0.0187586
16.96	375.886	2.7619	35.5956	0.983114	19.2396	0.531377	1.49281	0.0412299
16.98	376.222	2.81316	35.9422	1.01111	15.2736	0.42967	1.57358	0.0442674
17	376.575	2.53073	25.2728	0.639586	21.2418	0.537574	1.44584	0.0365903
17.02	376.837	2.77031	51.1741	1.41768	19.2776	0.53405	0.817876	0.0226577
17.04	377.285	2.5889	70.0879	1.81451	12.4394	0.322044	0.520291	0.0134698
17.06	377.597	2.11691	66.6326	1.41055	14.1403	0.299338	0.535756	0.0113415
17.08	377.858	2.10921	66.1858	1.396	14.9035	0.314346	0.490926	0.0103547
17.1	378.214	2.65658	53.1344	1.41156	20.086	0.5336	0.612004	0.0162584
17.12	378.636	3.26959	56.7662	1.85602	16.6685	0.544991	0.98902	0.0323369
17.14	379.072	3.07335	65.626	2.01691	12.1444	0.373238	1.00082	0.0307587
17.16	379.463	3.12136	59.4091	1.85437	16.073	0.501695	0.8507	0.0265534
17.18	379.897	7.98459	66.4538	5.30607	13.628	1.08814	0.623539	0.0497871
17.2	381.66	10.29	67.7593	6.97244	14.2609	1.46745	0.543147	0.0558899
17.22	382.438	4.97339	79.4782	3.95276	9.24758	0.459918	0.360559	0.017932
17.24	382.876	3.33965	72.6253	2.42543	12.0844	0.403576	0.488539	0.0163155
17.26	383.297	3.1428	72.7961	2.28783	12.1369	0.381439	0.365277	0.0114799
17.28	383.701	2.96129	73.5935	2.17932	12.2352	0.362321	0.466913	0.0138267
17.3	384.121	3.03618	74.6052	2.26515	10.0986	0.306611	0.507552	0.0154102
17.32	384.523	3.66875	71.0971	2.60837	12.5352	0.459886	0.504682	0.0185155
17.34	385.005	3.97933	68.0661	2.70857	13.2672	0.527947	0.674806	0.0268527
17.36	385.476	3.85363	69.4552	2.67654	11.0397	0.425428	0.730429	0.028148
17.38	385.969	3.91252	84.205	3.29454	6.33206	0.247743	0.430236	0.0168331
17.4	386.435	4.24052	84.2214	3.57143	6.59824	0.2798	0.398286	0.0168894
17.42	387.183	4.78014	81.1146	3.87739	6.98194	0.333746	0.538542	0.0257431
17.44	387.687	3.29903	59.2488	1.95464	12.3794	0.4084	1.24046	0.0409233
17.46	388.169	3.96896	82.8831	3.2896	5.90612	0.234412	0.496064	0.0196886
17.48	388.701	3.59404	74.7243	2.68563	8.38844	0.301484	0.726144	0.0260979
17.5	389.219	3.97028	72.936	2.89577	8.35175	0.331588	0.77329	0.0307018
17.52	389.736	3.97001	79.5709	3.15897	7.53082	0.298974	0.576151	0.0228732
17.54	390.258	4.25901	73.7573	3.14133	9.33322	0.397503	0.650449	0.0277027
17.56	390.778	3.53742	77.4061	2.73818	7.51139	0.265709	0.653343	0.0231115
17.58	391.179	2.21418	84.0238	1.86044	6.24219	0.138214	0.398425	0.00882187
17.6	391.33	1.56913	82.2452	1.29054	6.83399	0.107235	0.458132	0.00718871
17.62	391.572	1.96425	84.0475	1.65091	5.5547	0.109108	0.485531	0.00953707
17.64	391.828	1.94282	84.7052	1.64567	5.71286	0.110991	0.425778	0.00827212
17.66	392.056	1.65875	79.0822	1.31178	7.62721	0.126516	0.588811	0.00976689
17.68	392.278	2.0211	73.337	1.48221	8.78193	0.177492	0.824083	0.0166555
17.7	392.599	2.27527	84.7925	1.92926	5.76363	0.131138	0.427887	0.00973561
17.72	392.927	2.47777	83.816	2.07677	5.62645	0.139411	0.552579	0.0136916
17.74	393.183	2.32132	81.7547	1.89779	7.07365	0.164202	0.538293	0.0124955
17.76	393.481	2.39056	76.7614	1.83503	9.11945	0.218006	0.650204	0.0155435
17.78	393.758	2.33957	72.0775	1.68631	9.45377	0.221178	0.939756	0.0219863
17.8	394.061	2.44843	79.8433	1.95491	6.85288	0.167788	0.618848	0.0151521
17.82	394.363	2.3697	85.079	2.01611	5.43166	0.128714	0.45619	0.0108103
17.84	394.665	2.41304	84.356	2.03554	5.81327	0.140276	0.493671	0.0119125
17.86	394.956	2.33779	82.6854	1.93301	6.90066	0.161323	0.438765	0.0102574
17.88	395.245	3.06625	80.2733	2.46138	7.08692	0.217303	0.621012	0.0190418
17.9	395.722	3.43695	76.1574	2.6175	8.93815	0.3072	0.609744	0.0209566
17.92	396.088	2.92657	79.7697	2.33452	8.05433	0.235715	0.540517	0.0158186
17.94	396.431	2.7135	80.5646	2.18612	7.5604	0.205151	0.548955	0.0148959
17.96	396.774	2.57929	81.2901	2.09671	6.14524	0.158503	0.688195	0.0177505
17.98	397.113	3.75042	84.8599	3.1826	5.33956	0.200256	0.526112	0.0197314
18	397.685	2.9965	79.9035	2.39431	5.56964	0.166894	0.88116	0.026404
18.02	397.917	1.74492	77.4815	1.35199	6.87839	0.120022	0.874309	0.015256
18.04	398.148	1.81069	74.4455	1.34798	10.5434	0.190908	0.567196	0.0102701
18.06	398.394	1.81969	82.7043	1.50496	5.77743	0.105131	0.636066	0.0115744
18.08	398.639	1.89338	81.7788	1.54838	6.41609	0.121481	0.595346	0.0112722
18.1	398.884	1.85175	77.5809	1.4366	8.80769	0.163096	0.560258	0.0103746
18.12	399.141	1.95962	68.4514	1.34139	13.2542	0.259733	0.695956	0.0136381
18.14	399.386	2.02768	68.1349	1.38156	12.8323	0.260198	0.695721	0.014107
18.16	399.643	1.98244	75.1144	1.4891	9.49515	0.188235	0.534103	0.0105882
18.18	399.888	1.87101	45.0072	0.84209	26.9902	0.504989	0.483121	0.00903926
18.2	400.134	1.86588	74.1795	1.3841	10.6384	0.1985	0.639852	0.0119388
18.22	400.412	2.72887	76.7114	2.09336	10.0864	0.275245	0.425973	0.0116243
18.24	400.869	3.78275	76.4861	2.89328	9.72941	0.368039	0.516048	0.0195208
18.26	401.342	3.84148	54.0472	2.07622	22.8956	0.879531	0.433857	0.0166665
18.28	401.811	3.77629	67.4423	2.54682	14.2685	0.53882	0.586021	0.0221299
18.3	402.264	3.88431	84.948	3.29964	5.61682	0.218175	0.406255	0.0157802
18.32	402.777	3.46516	83.9109	2.90764	6.49645	0.225112	0.457561	0.0158552
18.34	403.108	3.19019	85.8603	2.7391	5.41342	0.172698	0.433931	0.0138432
18.36	403.569	3.82539	55.5685	2.12571	6.23412	0.238479	0.285856	0.0109351
18.38	404.013	4.34783	83.764	3.64191	6.46448	0.281064	0.362877	0.0157772
18.4	404.585	4.64654	72.0907	3.34972	12.3817	0.575319	0.475471	0.0220929
18.42	405.07	4.08253	86.3827	3.5266	5.19778	0.212201	0.416442	0.0170014
18.44	405.502	3.3738	86.4686	2.91728	5.15318	0.173858	0.36879	0.0124422
18.46	405.826	2.46986	90.2993	2.23027	3.79829	0.0938125	0.327331	0.00808463
18.48	406.142	2.54204	87.1276	2.21482	5.27478	0.134087	0.350639	0.0089134
18.5	406.443	2.56241	89.4316	2.2916	3.28785	0.0842481	0.319506	0.00818705
18.52	406.78	2.61292	89.5823	2.34071	3.31453	0.0866058	0.362811	0.00947995
18.54	407.106	2.49196	78.5475	1.95737	9.40214	0.234297	0.45349	0.0113008
18.56	407.393	2.89852	80.4194	2.33098	8.01285	0.232254	0.416634	0.0120762
18.58	407.819	3.38377	79.0434	2.67465	8.35105	0.282581	0.491576	0.0166338
18.6	408.235	2.98886	81.0567	2.42267	6.06622	0.181311	0.523169	0.0156368
18.62	408.551	4.73055	80.8298	3.8237	6.53703	0.309238	0.653859	0.0309311
18.64	409.322	4.23307	79.0964	3.34821	7.33829	0.310635	0.704311	0.029814
18.66	409.638	2.54562	83.6262	2.1288	4.80607	0.122344	0.742594	0.0189036
18.68	409.91	2.69049	85.6388	2.3041	4.64677	0.125021	0.557718	0.0150053
18.7	410.27	2.83141	87.7606	2.48486	4.02815	0.114053	0.507138	0.0143592
18.72	410.615	3.29268	89.7741	2.95597	4.07853	0.134293	0.370709	0.0122062
18.74	411.047	3.37131	89.7711	3.02646	2.87602	0.0969596	0.510261	0.0172025
18.76	411.459	3.44355	87.6108	3.01692	3.82843	0.131834	0.518768	0.017864
18.78	411.891	3.56396	86.907	3.09733	3.72069	0.132604	0.637795	0.0227308
18.8	412.324	3.35524	84.1842	2.82458	3.98665	0.133762	0.736501	0.0247113
18.82	412.729	3.32407	84.4278	2.80644	4.98186	0.165601	0.583646	0.0194008
18.84	413.138	3.61393	84.0668	3.03812	5.30487	0.191714	0.580646	0.0209841
18.86	413.562	3.92025	81.8983	3.21061	6.35953	0.249309	0.691541	0.0271101
18.88	414.063	3.82874	84.1462	3.22174	6.45829	0.247271	0.538488	0.0206173
18.9	414.495	3.45852	84.9549	2.93818	5.80092	0.200626	0.431924	0.0149382
18.92	414.869	3.16749	84.81	2.68635	6.52824	0.206781	0.37445	0.0118607
18.94	415.213	2.95826	84.8326	2.50957	6.06267	0.17935	0.426578	0.0126193
18.96	415.557	3.06398	85.2718	2.61271	5.50079	0.168543	0.538939	0.016513
18.98	415.9	3.0577	83.0734	2.54014	7.18572	0.219718	0.480587	0.0146949
19	416.244	3.07751	88.3201	2.71806	4.49436	0.138314	0.367706	0.0113162
19.02	416.589	3.07117	85.6981	2.63194	5.48456	0.16844	0.468335	0.0143834
19.04	416.941	3.43639	86.6004	2.97592	5.31117	0.182512	0.386524	0.0132825
19.06	417.384	3.67379	86.7272	3.18618	5.55292	0.204003	0.356302	0.0130898
19.08	417.795	3.47074	83.1765	2.88684	7.14837	0.248101	0.392198	0.0136122
19.1	418.188	3.52425	86.8504	3.06083	5.32881	0.187801	0.351618	0.0123919
19.12	418.598	3.61328	84.3948	3.04942	6.73325	0.243291	0.412306	0.0148978
19.14	418.99	3.54309	85.6364	3.03417	5.84732	0.207176	0.528994	0.0187427
19.16	419.385	3.04727	87.3253	2.66104	4.8892	0.148987	0.42999	0.0131029
19.18	419.777	3.44679	88.0058	3.03337	4.46923	0.154045	0.395713	0.0136394
19.2	420.196	3.62474	78.692	2.85238	9.2946	0.336905	0.418026	0.0151524
19.22	420.617	3.97544	74.5428	2.9634	11.6316	0.462408	0.418419	0.016634
19.24	421.13	4.32388	85.2741	3.68715	5.71168	0.246967	0.403625	0.0174523
19.26	421.646	4.61383	87.8949	4.05532	4.94378	0.228097	0.382023	0.0176259
19.28	422.212	4.58865	82.474	3.78445	7.49354	0.343853	0.458811	0.0210532
19.3	422.708	4.39133	81.4925	3.57861	7.79826	0.342448	0.429888	0.0188778
19.32	423.218	4.53874	80.9636	3.67473	7.82137	0.354992	0.485072	0.0220161
19.34	423.734	4.3462	83.237	3.61765	7.44917	0.323756	0.364553	0.0158442
19.36	424.206	4.48754	89.8856	4.03365	3.95086	0.177296	0.277101	0.012435
19.38	424.761	4.29452	90.9272	3.90488	3.39254	0.145693	0.374624	0.0160883
19.4	425.227	3.73468	90.8878	3.39437	3.60737	0.134724	0.312668	0.0116771
19.42	425.662	3.73704	88.23	3.29719	4.30631	0.160929	0.390724	0.0146015
19.44	426.15	4.16804	86.2807	3.59622	5.40346	0.225218	0.454699	0.0189521
19.46	426.674	4.43766	81.6821	3.62478	8.09428	0.359197	0.415362	0.0184324
19.48	427.199	4.53218	84.3931	3.82484	6.60025	0.299135	0.417441	0.0189192
19.5	427.725	4.36994	84.1937	3.67921	6.97779	0.304925	0.324363	0.0141744
19.52	428.251	5.43007	89.3781	4.85329	4.28038	0.232428	0.335603	0.0182235
19.54	428.981	5.13987	84.9593	4.3668	6.66362	0.342502	0.320264	0.0164611
19.56	429.468	4.31078	87.9733	3.79234	4.89337	0.210942	0.343184	0.0147939
19.58	429.984	4.92132	87.02	4.28253	5.073	0.249659	0.375374	0.0184734
19.6	430.608	5.44799	89.1591	4.85738	3.84614	0.209537	0.460715	0.0250997
19.62	431.209	4.81477	87.4688	4.21142	4.91197	0.2365	0.367834	0.0177104
19.64	431.734	4.49075	89.1473	4.00338	4.02808	0.180891	0.397495	0.0178505
19.66	432.26	4.60891	89.9757	4.1469	4.07017	0.18759	0.30138	0.0138903
19.68	432.785	4.5481	86.9592	3.95499	5.34415	0.243058	0.364966	0.016599
19.7	433.311	4.83679	87.5811	4.23611	5.12216	0.247748	0.38603	0.0186714
19.72	433.911	5.12617	85.5013	4.38295	5.59395	0.286755	0.383471	0.0196574
19.74	434.509	5.43471	88.306	4.79918	3.97783	0.216184	0.386119	0.0209845
19.76	435.21	5.46619	86.8635	4.74813	5.57937	0.304979	0.396061	0.0216495
19.78	435.862	5.64191	85.6215	4.83069	6.25663	0.352993	0.352498	0.0198877
19.8	436.609	5.29783	82.0622	4.34751	6.9665	0.369073	0.564876	0.0299261
19.82	437.2	4.61821	80.0865	3.69856	8.98882	0.415122	0.346828	0.0160172
19.84	437.698	4.04396	82.11	3.3205	8.39321	0.339418	0.270811	0.0109515
19.86	438.196	4.32228	84.9765	3.67292	6.75286	0.291877	0.26676	0.0115301
19.88	438.694	4.25374	86.7459	3.68995	5.49189	0.233611	0.364032	0.015485
19.9	439.192	4.24574	88.7231	3.76695	4.38243	0.186067	0.428046	0.0181737
19.92	439.689	4.27651	88.5564	3.78713	4.52283	0.193419	0.492136	0.0210463
19.94	440.192	4.98606	88.165	4.39596	4.49954	0.22435	0.418294	0.0208564
19.96	440.823	5.50233	88.0036	4.84224	4.6042	0.253338	0.474345	0.0261
19.98	441.487	5.55147	90.2476	5.01007	2.7985	0.155358	0.500192	0.027768
20	442.151	5.79024	86.9002	5.03173	3.62832	0.210088	0.767386	0.0444335
