# Supplementary material for: Variations in the Biological Pump through the Miocene: Evidence from organic carbon burial in Pacific Ocean sediments
Source: Copernicus journal article supplement (doi:10.5194/cp-2024-34), 2024-05-27
Supplement: Supplementary file 5 [file SuppTable_S12_U1337_Carbon_data.xlsx]

## Sheet: SuppTable_S12_U1337_Carbon_data
Site	Hole	Core	Type	Section	Interval (cm)	Depth (m CSF)	Depth (m CCSF)	Age (Ma)	CaCO3 (wt %)	C-org (wt %)	Bulk MAR (g/cm2/kyr)	C-org MAR (g/cm2/kyr)	CaCO3 MAR (g/cm2/kyr)
U1337	B	1	H	3	45.5	4.455	3.455	0.22683	40.52	0.16	1.26075	0.00201721	0.510856
U1337	C	2	H	5	145.5	9.355	11.2235	0.831873	23.96	0.21	1.38642	0.00291149	0.332186
U1337	A	3	H	4	100.5	20.505	16.395	1.17613	70.94	0.05	2.21236	0.00110618	1.56945
U1337	B	3	H	3	50.5	23.505	21.145	1.44817	4.47	0.14	1.48131	0.00207384	0.0662146
U1337	B	3	H	3	130.5	24.305	21.945	1.50975	60.11	0.13	2.23918	0.00291094	1.34597
U1337	B	3	H	4	120.5	25.705	23.345	1.56221	41.47	0.26	3.20852	0.00834215	1.33057
U1337	B	3	H	5	35.5	26.355	23.995	1.59799	17.45	0.16	1.86833	0.00298933	0.326024
U1337	B	3	H	5	90.5	26.905	24.545	1.6354	74.55	0.09	2.17437	0.00195694	1.62099
U1337	A	4	H	5	30.5	30.805	26.835	1.80236	27.7	0.14	1.18488	0.00165883	0.328212
U1337	A	5	H	3	125.5	38.255	36.955	2.53967	7.67	0.21	4.18984	0.00879866	0.321361
U1337	A	5	H	4	70.5	39.205	37.905	2.59473	56.19	0.14	2.18723	0.00306212	1.229
U1337	B	5	H	4	105.5	44.555	43.615	2.94446	40.1	0.12	1.88765	0.00226518	0.756948
U1337	B	5	H	5	70.5	45.705	44.765	3.01742	27	0.19	2.36304	0.00448978	0.638021
U1337	A	6	H	3	60.5	47.105	46.935	3.13013	25.9	0.19	2.51644	0.00478123	0.651758
U1337	B	6	H	3	80.5	52.305	52.595	3.40249	44.51	0.15	1.73115	0.00259672	0.770535
U1337	B	6	H	5	25.5	54.755	55.045	3.59765	9.52	0.17	2.75843	0.00468934	0.262603
U1337	B	7	H	3	40.5	61.405	62.795	3.91576	10.26	0.21	3.44337	0.00723108	0.35329
U1337	B	7	H	5	80.5	64.805	66.195	4.03194	4.37	0.23	2.48582	0.00571739	0.10863
U1337	A	8	H	2	120.5	65.205	68.265	4.11773	32.01	0.14	3.61154	0.00505615	1.15605
U1337	A	8	H	5	10.5	68.605	71.665	4.24494	6.96	0.29	4.44606	0.0128936	0.309446
U1337	A	8	H	5	35.5	68.855	71.915	4.25413	8.61	0.23	4.41907	0.0101639	0.380482
U1337	B	8	H	4	115.5	73.155	75.555	4.35959	9.21	0.24	2.93466	0.0070432	0.270282
U1337	A	9	H	4	35.5	76.855	81.165	4.61019	37.72	0.11	2.94186	0.00323605	1.10967
U1337	A	9	H	6	65.5	80.155	84.465	4.76424	6.42	0.21	2.55628	0.00536818	0.164113
U1337	B	9	H	4	5.5	81.555	85.125	4.79273	21.47	0.12	2.45474	0.00294569	0.527033
U1337	B	9	H	4	60.5	82.105	85.675	4.82465	38.34	0.09	2.52757	0.00227481	0.96907
U1337	A	11	H	1	130.5	92.305	98.155	5.44482	21.16	0.12	4.34324	0.00521189	0.91903
U1337	B	11	H	1	145.5	97.455	104.355	5.7057	65.42	0.08	3.65555	0.00292444	2.39146
U1337	B	11	H	2	65.5	98.155	105.055	5.73328	3.68	0.37	2.51604	0.00930935	0.0925903
U1337	A	12	H	4	145.5	106.455	113.045	6.04716	53.2	0.11	2.67588	0.00294347	1.42357
U1337	B	12	H	4	78.5	110.785	118.975	6.30629	51.83	0.09	5.92795	0.00533515	3.07246
U1337	A	13	H	3	15.5	113.155	120.685	6.35336	44.17	0.16	4.33015	0.00692824	1.91263
U1337	A	13	H	4	83.5	115.335	122.865	6.44122	48.27	0.18	2.12465	0.00382437	1.02557
U1337	A	13	H	5	33.5	116.335	123.865	6.49486	40.54	0.15	2.80926	0.00421389	1.13887
U1337	B	13	H	1	143.5	116.435	125.915	6.59755	12.42	0.17	3.11269	0.00529158	0.386596
U1337	B	13	H	4	5.5	119.555	129.035	6.69817	44.13	0.2	3.66936	0.00733873	1.61929
U1337	B	13	H	4	28.5	119.785	129.265	6.7157	56.27	0.1	2.84759	0.00284759	1.60234
U1337	A	14	H	6	123.5	128.235	137.855	6.96464	10.34	0.1	3.05745	0.00305745	0.31614
U1337	D	14	H	3	15.5	125.155	140.445	7.08512	79.63	0.09	4.34086	0.00390677	3.45663
U1337	A	15	H	4	128.5	134.785	146.115	7.30821	59.51	0.09	3.32673	0.00299406	1.97974
U1337	B	15	H	4	28.5	138.785	150.285	7.47942	49.94	0.16	2.22536	0.00356058	1.11134
U1337	B	15	H	4	113.5	139.635	151.135	7.52994	52.4	0.09	3.29962	0.00296965	1.729
U1337	A	16	H	2	88.5	140.885	152.825	7.61391	58.67	0.09	3.7843	0.00340587	2.22025
U1337	A	16	H	3	70.5	142.205	154.145	7.65737	28	0.25	3.16978	0.00792446	0.887538
U1337	A	16	H	5	68.5	145.185	157.125	7.76726	8.73	0.21	2.45266	0.00515058	0.214117
U1337	A	16	H	5	78.5	145.285	157.225	7.77335	68.55	0.12	2.61298	0.00313558	1.7912
U1337	A	17	H	4	140.5	153.905	167.315	8.2884	74.66	0.05	3.17933	0.00158967	2.37369
U1337	B	17	H	4	30.5	157.805	170.955	8.44545	74.39	0.06	2.99379	0.00179627	2.22708
U1337	A	18	H	2	120.5	160.205	175.475	8.7129	11.4	0.21	2.92731	0.00614734	0.333713
U1337	A	18	H	3	25.5	160.775	176.045	8.73553	36.93	0.31	2.37902	0.00737495	0.878572
U1337	A	18	H	4	28.5	162.325	177.595	8.81283	53.92	0.1	3.47864	0.00347864	1.87568
U1337	B	18	H	6	43.5	170.435	184.515	9.14402	37.04	0.14	3.8803	0.00543242	1.43726
U1337	A	19	H	3	53.5	170.535	186.675	9.30221	35.05	0.08	1.98073	0.00158458	0.694246
U1337	B	19	H	5	39.5	178.455	194.075	9.72129	1.25	0.2	3.92634	0.00785269	0.0490793
U1337	A	20	H	2	84.5	178.845	195.725	9.77855	0.67	0.12	3.17312	0.00380774	0.0212599
U1337	A	20	H	4	15.5	181.155	198.035	9.85457	35.17	0.09	4.05809	0.00365229	1.42723
U1337	B	20	H	1	123.5	182.735	199.845	9.91221	39.38	0.1	3.77641	0.00377641	1.48715
U1337	B	20	H	2	108.5	184.085	201.195	9.97021	3.22	0.07	3.04084	0.00212859	0.097915
U1337	C	6	H	1	50.5	188.905	212.905	10.383	40.66	0.8	3.05183	0.0244147	1.24087
U1337	D	22	H	2	4.5	195.045	217.655	10.5713	61.15	0.09	3.40091	0.00306082	2.07966
U1337	D	22	H	2	50.5	195.505	218.115	10.5886	31.92	0.1	3.51832	0.00351832	1.12305
U1337	C	7	H	2	42.5	194.725	219.639	10.6426	5.01	0.16	3.35178	0.00536285	0.167924
U1337	C	7	H	2	100.5	195.305	220.219	10.6632	25.31	0.11	3.07443	0.00338187	0.778138
U1337	A	23	X	3	68.5	207.985	226.865	10.9631	56.24	0.07	3.47435	0.00243205	1.95397
U1337	A	23	X	6	20.5	212.005	230.885	11.1312	9.62	0.15	3.39668	0.00509503	0.326761
U1337	A	23	X	6	32.5	212.125	231.005	11.1364	47.25	0.1	3.7281	0.0037281	1.76153
U1337	C	8	H	3	36.5	205.665	232.594	11.1782	20.23	0.14	3.84654	0.00538515	0.778155
U1337	C	8	H	4	73.5	207.535	234.464	11.2844	76.51	0.05	2.38157	0.00119078	1.82214
U1337	C	8	H	4	121.5	208.015	234.944	11.3133	67.05	0.08	2.51087	0.0020087	1.68354
U1337	C	8	H	6	36.5	210.165	237.094	11.4171	55.97	0.2	2.91711	0.00583421	1.63271
U1337	C	8	H	6	78.5	210.585	237.514	11.4367	30.63	0.42	2.66044	0.0111739	0.814893
U1337	C	9	H	3	60.5	215.405	242.371	11.6615	85.2	0.04	4.75499	0.001902	4.05125
U1337	A	26	X	1	115.5	234.155	254.735	11.9967	57.44	0.05	6.7376	0.0033688	3.87008
U1337	B	25	H	2	78.5	228.685	250.235	11.8916	74.05	0.05	4.70891	0.00235446	3.48695
U1337	A	26	X	2	8.5	234.585	255.165	12.0051	75.18	0.04	7.34779	0.00293911	5.52407
U1337	C	11	X	1	115.5	232.055	260.215	12.0863	73.43	0.05	9.34916	0.00467458	6.86509
U1337	C	11	X	6	35.5	238.355	266.515	12.1838	32.45	0.42	9.61852	0.0403978	3.12121
U1337	D	28	H	1	65.5	242.055	268.675	12.2156	70.22	0.07	9.80429	0.006863	6.88457
U1337	D	28	H	1	115.5	242.555	269.175	12.223	68.68	0.06	10.1424	0.00608542	6.9658
U1337	C	12	X	3	95.5	244.455	276.113	12.4126	90.36	0.06	6.1239	0.00367434	5.53356
U1337	C	13	X	1	75.5	250.855	283.469	12.6683	84.02	0.05	3.84365	0.00192182	3.22943
U1337	D	29	H	5	23.5	254.235	283.105	12.6535	31.8	0.03	4.14479	0.00124344	1.31804
U1337	C	13	X	3	108.5	254.185	286.799	12.7829	78.22	0.04	4.683	0.0018732	3.66304
U1337	D	30	H	6	95.5	265.955	295.895	13.1465	87.03	0.04	4.5553	0.00182212	3.96448
U1337	C	14	X	5	87.5	266.575	302.745	13.3956	79.94	0.05	5.20329	0.00260165	4.15951
U1337	D	31	X	4	59.5	272.095	306.785	13.5173	59.59	0.1	4.48744	0.00448744	2.67407
U1337	D	32	X	2	130.5	279.005	313.315	13.6948	89.11	0.03	6.62513	0.00198754	5.90365
U1337	C	16	X	2	3.5	280.435	316.483	13.7889	82.38	0.06	4.55113	0.00273068	3.74922
U1337	C	16	X	3	135.5	283.255	319.303	13.9154	81.51	0.05	3.45906	0.00172953	2.81948
U1337	A	32	X	1	133.5	291.535	319.975	13.9418	38.56	0.06	3.86016	0.0023161	1.48848
U1337	A	32	X	2	73.5	292.435	320.875	13.9698	85.56	0.03	3.80261	0.00114078	3.25351
U1337	A	32	X	3	55.5	293.755	322.195	14.0307	61.97	0.05	2.47479	0.00123739	1.53363
U1337	C	17	X	2	133.5	291.335	325.842	14.2468	52.67	0.05	2.80596	0.00140298	1.4779
U1337	C	17	X	4	103.5	294.035	328.542	14.3698	55.66	0.05	3.86423	0.00193212	2.15083
U1337	C	18	X	4	35.5	302.955	337.993	14.9247	84.88	0.03	2.72092	0.000816276	2.30952
U1337	A	34	X	4	58.5	314.385	343.285	15.2412	83.96	0.04	2.39047	0.000956188	2.00704
U1337	C	19	X	4	85.5	313.055	348.093	15.47	79.91	0.03	3.21737	0.000965211	2.571
U1337	A	35	X	2	130.5	321.705	350.375	15.5673	19.53	0.07	3.23972	0.0022678	0.632717
U1337	D	36	X	4	115.5	320.155	354.145	15.6752	78.99	0.06	3.79557	0.00227734	2.99812
U1337	C	20	X	6	45.5	325.255	362.274	16.2242	80.48	0.04	1.84121	0.000736484	1.48181
U1337	C	20	X	6	99.5	325.795	362.814	16.2637	75.54	0.05	2.4062	0.0012031	1.81764
U1337	A	36	X	3	120.5	332.705	363.345	16.2988	75.24	0.03	2.24555	0.000673666	1.68955
U1337	C	20	X	7	45.5	326.255	363.274	16.2939	66.09	0.1	2.2347	0.0022347	1.47691
U1337	C	20	X	7	90.5	326.705	363.724	16.3247	77.27	0.05	2.95632	0.00147816	2.28435
U1337	A	36	X	4	45.5	333.455	364.095	16.3422	71.29	0.04	3.61535	0.00144614	2.57738
U1337	A	36	X	4	120.5	334.205	364.845	16.3762	77.27	0.04	3.84562	0.00153825	2.97151
U1337	A	36	X	5	45.5	334.955	365.595	16.402	84.12	0.04	3.35937	0.00134375	2.8259
U1337	C	21	X	1	45.5	327.255	365.609	16.4029	84.44	0.04	3.35087	0.00134035	2.82947
U1337	A	36	X	5	120.5	335.705	366.345	16.4386	64.19	0.08	2.71097	0.00216877	1.74017
U1337	C	21	X	1	120.5	328.005	366.359	16.4395	58.78	0.04	2.69498	0.00107799	1.58411
U1337	C	21	X	2	45.5	328.755	367.109	16.4722	80.84	0.04	3.80296	0.00152118	3.07431
U1337	C	21	X	2	120.5	329.505	367.859	16.5147	66.95	0.05	2.68363	0.00134181	1.79669
U1337	C	21	X	3	45.5	330.255	368.609	16.5549	78.08	0.03	2.8376	0.00085128	2.2156
U1337	C	21	X	3	120.5	331.005	369.359	16.5955	64.73	0.05	2.96048	0.00148024	1.91632
U1337	C	21	X	4	45.5	331.755	370.109	16.6377	69.15	0.04	2.22713	0.00089085	1.54006
U1337	C	21	X	4	120.5	332.505	370.859	16.6745	75.92	0.03	4.49285	0.00134785	3.41097
U1337	C	21	X	5	45.5	333.255	371.609	16.7044	68.61	0.04	2.08072	0.000832289	1.42758
U1337	C	21	X	5	119.5	333.995	372.349	16.7558	74.4	0.04	2.38493	0.000953971	1.77439
U1337	A	37	X	2	45.5	339.955	372.135	16.7412	18.79	0.07	2.34055	0.00163839	0.439789
U1337	A	37	X	2	120.5	340.705	372.885	16.7832	74.97	0.04	3.01608	0.00120643	2.26116
U1337	A	37	X	3	45.5	341.455	373.635	16.8235	72.72	0.04	2.55767	0.00102307	1.85994
U1337	A	37	X	3	120.5	342.205	374.385	16.8686	59.11	0.05	2.4054	0.0012027	1.42183
U1337	A	37	X	4	45.5	342.955	375.135	16.9154	68.15	0.09	2.11852	0.00190667	1.44377
U1337	A	37	X	4	120.5	343.705	375.885	16.96	24.57	0.06	2.76117	0.0016567	0.678419
U1337	A	37	X	5	45.5	344.455	376.635	17.0038	25.66	0.06	2.58581	0.00155149	0.663519
U1337	A	37	X	5	120.5	345.205	377.385	17.0473	71.46	0.04	2.43833	0.000975333	1.74243
U1337	C	22	X	2	45.5	338.355	378.026	17.0904	54.61	0.05	2.36689	0.00118345	1.29256
U1337	C	22	X	2	120.5	339.105	378.776	17.1254	62.39	0.03	3.20675	0.000962025	2.00069
U1337	A	37	X	6	45.5	345.955	378.135	17.0953	51.75	0.05	2.53481	0.0012674	1.31176
U1337	A	37	X	6	120.5	346.705	378.885	17.1322	54.73	0.05	3.15752	0.00157876	1.72811
U1337	C	22	X	3	45.5	339.855	379.526	17.1629	51.49	0.04	3.82224	0.0015289	1.96807
U1337	C	22	X	3	120.5	340.605	380.276	17.1957	69.72	0.03	8.47972	0.00254391	5.91206
U1337	C	22	X	4	45.5	341.355	381.026	17.1977	61.42	0.04	9.46058	0.00378423	5.81069
U1337	C	22	X	4	120.5	342.105	381.776	17.1997	63.11	0.06	9.49865	0.00569919	5.9946
U1337	D	39	X	2	120.5	345.905	383.335	17.2618	73.58	0.03	3.12577	0.000937731	2.29994
U1337	D	39	X	3	45.5	346.655	384.085	17.2981	71.97	0.03	3.02984	0.000908952	2.18058
U1337	D	39	X	3	120.5	347.405	384.835	17.333	72.66	0.03	3.86986	0.00116096	2.81184
U1337	D	39	X	4	45.5	348.155	385.585	17.3644	71.13	0.03	3.86665	0.00115999	2.75035
U1337	D	39	X	4	120.5	348.905	386.335	17.3946	85.35	0.03	4.17024	0.00125107	3.5593
U1337	D	39	X	5	45.5	349.655	387.085	17.4166	80.29	0.03	4.70971	0.00141291	3.78143
U1337	D	39	X	5	120.5	350.405	387.835	17.4461	64.27	0.04	3.50506	0.00140202	2.2527
U1337	C	23	X	1	45.5	346.455	387.751	17.4431	64.85	0.05	3.38876	0.00169438	2.19761
U1337	C	23	X	1	120.5	347.205	388.501	17.4717	76.98	0.04	3.73482	0.00149393	2.87506
U1337	C	23	X	2	119.5	348.695	389.991	17.5298	78.42	0.03	4.11132	0.0012334	3.2241
U1337	C	23	X	2	120.5	348.705	390.001	17.5302	59.75	0.04	4.11686	0.00164674	2.45982
U1337	C	23	X	3	45.5	349.455	390.751	17.5591	78.6	0.03	3.57428	0.00107228	2.80938
U1337	C	23	X	3	120.5	350.205	391.501	17.6136	81.23	0.03	1.84824	0.000554473	1.50133
U1337	C	23	X	4	45.5	350.955	392.251	17.6776	69.3	0.04	1.97801	0.000791204	1.37076
U1337	C	23	X	4	120.5	351.705	393.001	17.7254	84.04	0.06	2.4322	0.00145932	2.04402
U1337	D	40	X	2	45.5	354.755	392.865	17.7168	82.87	0.03	2.43967	0.000731902	2.02175
U1337	D	40	X	2	120.5	355.505	393.615	17.7697	70.86	0.03	2.36593	0.000709779	1.6765
U1337	D	40	X	3	45.5	356.255	394.365	17.8202	84.31	0.02	2.37002	0.000474003	1.99816
U1337	D	40	X	3	120.5	357.005	395.115	17.8707	74.49	0.03	2.73879	0.000821638	2.04012
U1337	D	40	X	4	45.5	357.755	395.865	17.9064	71.64	0.03	3.23751	0.000971254	2.31935
U1337	D	40	X	4	120.5	358.505	396.615	17.9511	77.49	0.04	2.64139	0.00105656	2.04681
U1337	D	40	X	5	45.5	359.255	397.365	17.9906	79.24	0.04	3.418	0.0013672	2.70842
U1337	D	40	X	5	120.5	360.005	398.115	18.0372	69.9	0.04	1.80121	0.000720485	1.25905
U1337	C	24	X	2	120.5	358.305	399.051	18.1126	64.28	0.06	1.92185	0.00115311	1.23537
U1337	D	40	X	6	45.5	360.755	398.865	18.0984	63.06	0.04	1.85499	0.000741998	1.16976
U1337	C	24	X	3	45.5	359.055	399.801	18.1729	47.35	0.04	1.9106	0.000764239	0.904669
U1337	C	24	X	3	120.5	359.805	400.551	18.2264	82.05	0.03	3.04951	0.000914852	2.50212
U1337	C	24	X	4	45.5	360.555	401.301	18.2584	65.44	0.04	3.83647	0.00153459	2.51059
U1337	C	24	X	4	120.5	361.305	402.051	18.2906	75.17	0.03	3.8336	0.00115008	2.88172
U1337	C	24	X	5	45.5	362.055	402.801	18.3215	82.29	0.03	3.44502	0.00103351	2.83491
U1337	C	24	X	5	120.5	362.805	403.551	18.3592	78.53	0.05	3.80136	0.00190068	2.98521
U1337	A	40	X	1	45.5	367.255	403.765	18.3688	84.27	0.03	4.05594	0.00121678	3.41794
U1337	A	40	X	1	120.5	368.005	404.515	18.3973	73.97	0.05	4.61014	0.00230507	3.41012
U1337	A	40	X	2	45.5	368.755	405.265	18.4282	83.09	0.02	3.76284	0.000752568	3.12654
U1337	A	40	X	2	120.5	369.505	406.015	18.4718	87.73	0.02	2.51305	0.00050261	2.2047
U1337	A	40	X	3	45.5	370.255	406.765	18.5191	88.2	0.02	2.61067	0.000522135	2.30261
U1337	A	40	X	3	120.5	371.005	407.515	18.5682	84.48	0.02	3.03762	0.000607524	2.56618
U1337	A	40	X	4	45.5	371.755	408.265	18.6012	76.47	0.02	3.15436	0.000630873	2.41214
U1337	A	40	X	4	120.5	372.505	409.015	18.6268	72.78	0.02	4.43098	0.000886196	3.22487
U1337	C	25	X	2	120.5	367.905	409.821	18.6748	79.26	0.04	2.64328	0.00105731	2.09506
U1337	A	40	X	5	45.5	373.255	409.765	18.6716	81.57	0.02	2.61328	0.000522657	2.13165
U1337	C	25	X	3	45.5	368.655	410.571	18.7175	88.75	0.04	3.23454	0.00129381	2.87065
U1337	C	25	X	3	120.5	369.405	411.321	18.7533	86.62	0.04	3.41941	0.00136776	2.96189
U1337	C	25	X	4	45.5	370.155	412.071	18.7887	86.35	0.04	3.47707	0.00139083	3.00245
U1337	C	25	X	4	120.5	370.905	412.821	18.8252	80.71	0.04	3.38949	0.00135579	2.73566
U1337	C	25	X	5	45.5	371.655	413.571	18.8601	75.7	0.04	3.91862	0.00156745	2.9664
U1337	C	25	X	5	120.5	372.405	414.321	18.8916	82.24	0.04	3.60728	0.00144291	2.96663
U1337	A	41	X	1	45.5	376.855	414.345	18.8927	82.95	0.04	3.587	0.0014348	2.97542
U1337	A	41	X	1	120.5	377.605	415.095	18.9331	86.62	0.02	3.0301	0.000606021	2.62467
U1337	A	41	X	2	45.5	378.355	415.845	18.9768	80.72	0.02	3.05871	0.000611741	2.46899
U1337	A	41	X	2	120.5	379.105	416.595	19.0203	83.19	0.02	3.07763	0.000615527	2.56028
U1337	A	41	X	3	45.5	379.855	417.345	19.0577	85.25	0.02	3.6527	0.000730539	3.11393
U1337	A	41	X	3	120.5	380.605	418.095	19.0946	86.41	0.02	3.51156	0.000702311	3.03434
U1337	C	26	X	1	45.5	375.155	418.651	19.1231	83.18	0.04	3.60378	0.00144151	2.99762
U1337	C	26	X	1	120.5	375.905	419.401	19.1609	85.14	0.04	3.06428	0.00122571	2.60893
U1337	A	41	X	4	45.5	381.355	418.845	19.1329	79.43	0.03	3.56906	0.00107072	2.8349
U1337	C	26	X	2	45.5	376.655	420.151	19.1991	89.99	0.03	3.60583	0.00108175	3.24489
U1337	C	26	X	2	120.5	377.405	420.901	19.2306	74.85	0.04	4.16877	0.00166751	3.12032
U1337	C	26	X	3	45.5	378.155	421.651	19.2602	86.42	0.03	4.61357	0.00138407	3.98705
U1337	C	26	X	3	120.5	378.905	422.401	19.2871	87.01	0.03	4.51329	0.00135399	3.92701
U1337	C	26	X	4	45.5	379.655	423.151	19.3171	79.12	0.03	4.51935	0.00135581	3.57571
U1337	C	26	X	4	120.5	380.405	423.901	19.3472	87.73	0.03	4.39629	0.00131889	3.85687
U1337	C	26	X	5	45.5	381.155	424.651	19.3753	85.42	0.03	4.33268	0.0012998	3.70098
U1337	C	26	X	5	120.5	381.905	425.401	19.4075	90.05	0.04	3.73563	0.00149425	3.36393
U1337	C	26	X	6	45.5	382.655	426.151	19.4401	85.27	0.03	4.16888	0.00125067	3.5548
U1337	A	42	X	1	45.5	386.455	426.325	19.4467	80.03	0.02	4.25821	0.000851642	3.40785
U1337	A	42	X	1	120.5	387.205	427.075	19.4753	79.21	0.04	4.50979	0.00180392	3.5722
U1337	A	42	X	2	45.5	387.955	427.825	19.5038	83.14	0.04	4.57156	0.00182863	3.80079
U1337	A	42	X	2	120.5	388.705	428.575	19.5293	84.58	0.04	5.30123	0.00212049	4.48378
U1337	C	27	X	1	45.5	384.755	430.451	19.594	85.87	0.03	5.31528	0.00159459	4.56423
U1337	C	27	X	1	120.5	385.505	431.201	19.6197	86.01	0.04	4.8231	0.00192924	4.14835
U1337	C	27	X	2	45.5	386.255	431.951	19.6482	89.26	0.03	4.53944	0.00136183	4.0519
U1337	C	27	X	2	120.5	387.005	432.701	19.6768	86.37	0.04	4.55789	0.00182316	3.93665
U1337	C	27	X	3	45.5	387.755	433.451	19.7053	85.46	0.06	4.90417	0.0029425	4.1911
U1337	C	27	X	3	120.5	388.505	434.201	19.7311	85.1	0.04	5.27546	0.00211018	4.48942
U1337	C	27	X	4	45.5	389.255	434.951	19.751	85.53	0.04	5.45454	0.00218182	4.66527
U1337	C	27	X	4	120.5	390.005	435.701	19.7735	88.03	0.04	5.59837	0.00223935	4.92825
U1337	A	43	X	1	45.5	396.055	435.745	19.7743	86.48	0.03	5.61033	0.0016831	4.85181
U1337	A	43	X	1	120.5	396.805	436.495	19.7974	83.08	0.03	5.35025	0.00160507	4.44499
U1337	A	43	X	2	45.5	397.555	437.245	19.8218	81.98	0.05	4.56603	0.00228302	3.74323
U1337	A	43	X	2	120.5	398.305	437.995	19.8519	82.16	0.04	4.20992	0.00168397	3.45887
U1337	A	43	X	3	45.5	399.055	438.745	19.882	84.19	0.04	4.25293	0.00170117	3.58054
U1337	A	43	X	3	120.5	399.805	439.495	19.9121	81.18	0.03	4.26448	0.00127934	3.4619
U1337	A	43	X	4	45.5	400.555	440.245	19.9416	83.44	0.03	5.02959	0.00150888	4.19669
U1337	A	43	X	4	120.5	401.305	440.995	19.9652	82.6	0.04	5.51507	0.00220603	4.55545
U1337	A	43	X	5	45.5	402.055	441.745	19.9878	79.96	0.03	5.64421	0.00169326	4.51311
U1337	A	43	X	5	120.5	402.805	442.495	20.0104	81.6	0.03	5.91382	0.00177414	4.82568
U1337	A	43	X	6	45.5	403.555	443.245	20.0359	87.73	0.03	6.18342	0.00185503	5.42471
U1337	A	43	X	6	99.5	404.095	443.785	20.0522	82.98	0.03	6.37754	0.00191326	5.29208
U1337	A	43	X	7	45.5	404.555	444.245	20.0661	85.3	0.04	6.5429	0.00261716	5.58109
