# Supplementary material for: Variations in the Biological Pump through the Miocene: Evidence from organic carbon burial in Pacific Ocean sediments
Source: Copernicus journal article supplement (doi:10.5194/cp-2024-34), 2024-05-27
Supplement: Supplementary file 7 [file SuppTable_S13_U1338_Corg_and_MAR.xlsx]

## Sheet: SuppTable_S13_Corg_and_MAR
Site	Hole	Core	Type	Section	Interval (cm)	Depth (m CSF)	Depth (m CCSF)	Age (ka)	CaCO3 (wt %)	C-org (wt %)	BaSO4 (XRF-est wt %)	Bulk MAR (g/cm2/kyr	CaCO3 MAR (g/cm2/kyr)	C-org MAR (g/cm2/kyr)	BaSO4 MAR (g/cm2/kyr)
U1338	A	1	H	1	45	0.455	0.495	24.7357	82.0465	0.253674	0.373506	0.970765	0.796478	0.00246257	0.00362587
U1338	A	1	H	1	120	1.205	1.245	57.775	70.4801	0.178801	0.552679	0.990742	0.698276	0.00177146	0.00547562
U1338	B	1	H	2	45	1.955	1.9575	132.295	60.8746	0.0809203	0.846659	0.492954	0.300084	0.0003989	0.00417364
U1338	A	1	H	2	45	1.955	1.995	135.796	62.1579	0.0757932	1.15726	0.572276	0.355714	0.000433746	0.00662272
U1338	B	1	H	2	120	2.705	2.7075	180.818	52.8358	0.314392	1.68511	0.473175	0.250006	0.00148763	0.00797353
U1338	A	1	H	2	120	2.705	2.745	183.289	70.2254	0.257896	2.54214	0.450609	0.316442	0.0011621	0.0114551
U1338	B	1	H	3	45	3.455	3.4575	239.825	77.49	0.0964724	0.346686	0.586208	0.454253	0.000565529	0.0020323
U1338	B	1	H	3	120	4.205	4.2075	319.525	69.1372	0.116787	0.745698	0.480788	0.332403	0.000561497	0.00358523
U1338	B	1	H	4	45	4.955	4.9575	385.799	58.1361	0.106977	1.67038	0.545409	0.317079	0.000583461	0.00911042
U1338	B	1	H	4	120	5.705	5.7075	452.65	83.7759	0.0656716	0.234667	0.859808	0.720312	0.00056465	0.00201769
U1338	A	2	H	2	45	4.655	6.135	481.416	53.2612	0.113602	0.968213	1.53758	0.818932	0.00174672	0.014887
U1338	A	2	H	2	120	5.405	6.885	540.848	79.3716	0.0728653	0.320829	0.568922	0.451562	0.000414547	0.00182527
U1338	A	2	H	3	45	6.155	7.635	635.307	79.8214	0.044164	0.428704	0.92892	0.741477	0.000410249	0.00398232
U1338	A	2	H	3	120	6.905	8.385	682.784	80.4979	0.0726322	0.321068	0.767019	0.617434	0.000557103	0.00246265
U1338	A	2	H	4	45	7.655	9.135	733.74	74.8706	0.0766805	0.301063	1.03036	0.77144	0.000790089	0.00310204
U1338	A	2	H	4	120	8.405	9.885	776.081	64.389	0.0666159	0.728079	1.07125	0.689766	0.000713621	0.00779953
U1338	A	2	H	5	45	9.155	10.635	831.651	55.0151	0.100688	0.904505	0.346737	0.190758	0.000349123	0.00313625
U1338	A	2	H	5	120	9.905	11.385	901.394	79.9899	0.0585086	0.214255	0.872106	0.697597	0.000510257	0.00186853
U1338	A	2	H	6	45	10.655	12.135	949.479	40.6206	0.090734	0.829858	0.560431	0.22765	0.000508501	0.00465078
U1338	B	2	H	3	45	11.055	12.345	966.533	57.9195	0.0744094	0.644304	0.491653	0.284763	0.000365836	0.00316774
U1338	A	2	H	6	120	11.405	12.885	1015.85	63.7659	0.106289	0.623129	0.696426	0.444083	0.000740228	0.00433963
U1338	B	2	H	3	120	11.805	13.095	1032.08	77.4819	0.0480175	0.308248	0.863482	0.669042	0.000414623	0.00266167
U1338	B	2	H	4	45	12.555	13.845	1082.03	78.4849	0.0442323	0.325317	0.75567	0.593087	0.00033425	0.00245833
U1338	B	2	H	4	120	13.305	14.595	1127.91	67.4603	0.116598	0.638625	1.026	0.69214	0.00119629	0.00655227
U1338	B	2	H	5	45	14.055	15.345	1189.65	81.604	0.0406504	0.262286	1.07694	0.87883	0.000437782	0.00282467
U1338	B	2	H	5	120	14.805	16.095	1249.58	67.7485	0.0549082	0.433956	0.404958	0.274353	0.000222355	0.00175734
U1338	B	2	H	6	45	15.555	16.845	1302.6	75.6806	0.0955123	0.307163	0.615913	0.466126	0.000588272	0.00189185
U1338	B	2	H	6	120	16.305	17.595	1342.06	70.8213	0.0799607	0.335119	1.16377	0.824198	0.00093056	0.00390002
U1338	A	3	H	3	45	15.655	17.885	1356.4	45.1022	0.111995	0.809052	0.804175	0.3627	0.000900638	0.00650619
U1338	A	3	H	3	120	16.405	18.635	1412.14	69.8023	0.0553599	0.408442	0.539584	0.376642	0.000298713	0.00220388
U1338	A	3	H	4	45	17.155	19.385	1478.36	47.04	0.0549808	0.857474	0.414689	0.19507	0.000227999	0.00355585
U1338	A	3	H	4	120	17.905	20.135	1535.56	64.2971	0.198866	0.415155	0.715624	0.460125	0.00142313	0.00297095
U1338	A	3	H	5	45	18.655	20.885	1579.21	55.7338	0.190288	0.734637	0.619786	0.34543	0.00117938	0.00455318
U1338	B	3	H	2	45	19.055	21.123	1599.77	58.6324	0.0859693	0.778346	0.593194	0.347804	0.000509965	0.0046171
U1338	A	3	H	5	120	19.405	21.635	1641.55	73.2148	0.0958061	0.279414	0.603026	0.441504	0.000577735	0.00168494
U1338	B	3	H	2	120	19.805	21.873	1658.6	75.4639	0.228549	0.383093	0.650079	0.490575	0.00148575	0.0024904
U1338	B	3	H	3	45	20.555	22.623	1719	62.65	0.105284	0.779353	0.742642	0.465265	0.000781881	0.0057878
U1338	B	3	H	3	120	21.305	23.373	1777.03	70.9219	0.0444794	0.508143	0.60072	0.426042	0.000267197	0.00305251
U1338	B	3	H	4	45	22.055	24.123	1852.22	51.8469	0.109455	1.12601	0.363185	0.1883	0.000397523	0.0040895
U1338	B	3	H	4	120	22.805	24.873	1910.59	34.6632	0.116192	1.39564	0.785477	0.272272	0.000912658	0.0109625
U1338	B	3	H	5	45	23.555	25.623	1956.66	29.8325	0.197311	1.40846	0.597031	0.17811	0.00117801	0.00840896
U1338	B	3	H	5	120	24.305	26.373	1997.48	61.09	0.0991242	0.936969	0.869144	0.53096	0.000861532	0.00814361
U1338	B	3	H	6	45	25.055	27.123	2031.22	68.5669	0.0605648	0.522056	1.13919	0.781104	0.000689945	0.00594719
U1338	B	3	H	6	120	25.805	27.873	2069.3	63.6738	0.0863113	0.753482	0.764865	0.487018	0.000660165	0.00576312
U1338	B	3	H	7	45	26.555	28.623	2120.24	69.0157	0.126738	0.557713	0.613768	0.423596	0.000777881	0.00342306
U1338	A	4	H	3	45	25.155	28.775	2134.94	69.4243	0.0829916	0.63144	0.531374	0.368903	0.000440996	0.00335531
U1338	A	4	H	3	120	25.905	29.525	2213.43	57.3482	0.069926	1.02974	1.04249	0.59785	0.000728973	0.010735
U1338	A	4	H	4	45	26.655	30.275	2243.84	56.309	0.116507	0.820876	0.751253	0.423023	0.00087526	0.00616685
U1338	A	4	H	4	120	27.405	31.025	2321.55	52.969	0.105584	0.786572	0.36292	0.192235	0.000383186	0.00285463
U1338	A	4	H	5	45	28.155	31.775	2403.1	75.6649	0.058356	0.264752	0.591671	0.447687	0.000345275	0.00156646
U1338	A	4	H	5	120	28.905	32.525	2452.87	53.2855	0.112722	0.601785	0.648681	0.345653	0.000731208	0.00390366
U1338	A	4	H	6	45	29.655	33.275	2516.1	64.7393	0.120472	0.419372	0.800524	0.518253	0.000964411	0.00335718
U1338	A	4	H	6	120	30.405	34.025	2554.26	37.8294	0.241161	1.14265	0.49618	0.187702	0.00119659	0.00566961
U1338	B	4	H	4	45	31.555	34.22	2569.31	55.8418	0.181854	0.765799	0.36576	0.204247	0.000665147	0.00280099
U1338	B	4	H	4	120	32.305	34.97	2630.68	61.8128	0.148978	0.772234	0.479594	0.296451	0.00071449	0.00370359
U1338	B	4	H	5	45	33.055	35.72	2684.9	74.01	0.093074	0.399217	0.554165	0.410137	0.000515783	0.00221232
U1338	B	4	H	5	120	33.805	36.47	2723.73	59.5981	0.208047	0.669919	0.979803	0.583944	0.00203845	0.00656389
U1338	B	4	H	6	45	34.555	37.22	2776.45	68.6035	0.070805	0.553761	0.797176	0.546891	0.000564441	0.00441445
U1338	A	5	H	1	45	31.655	37.355	2785.54	64.2043	0.124393	0.462831	0.709059	0.455246	0.000882017	0.00328175
U1338	B	4	H	6	120	35.305	37.97	2827.38	77.801	0.0574443	0.366436	0.740912	0.576437	0.000425612	0.00271496
U1338	A	5	H	1	120	32.405	38.105	2837.89	73.9642	0.074856	0.51995	0.689623	0.510074	0.000516225	0.0035857
U1338	A	5	H	2	45	33.155	38.855	2894.98	59.3438	0.0665886	0.732666	0.850551	0.50475	0.00056637	0.0062317
U1338	A	5	H	2	120	33.905	39.605	2940.1	71.7094	0.108876	1.04659	0.876142	0.628276	0.000953912	0.00916959
U1338	A	5	H	3	45	34.655	40.355	2987.89	53.4504	0.107869	1.3568	0.615862	0.329181	0.000664327	0.008356
U1338	A	5	H	3	120	35.405	41.105	3043.13	43.9263	0.17882	1.69714	0.64376	0.28278	0.00115117	0.0109255
U1338	A	5	H	4	45	36.155	41.855	3092.15	34.9611	0.121672	1.56049	0.352141	0.123113	0.000428458	0.00549514
U1338	A	5	H	4	120	36.905	42.605	3146.41	23.8385	0.174976	1.55725	0.678058	0.161639	0.00118644	0.0105591
U1338	A	5	H	5	45	37.655	43.355	3191.29	39.8551	0.147117	1.24401	0.383034	0.152659	0.000563506	0.00476497
U1338	B	5	H	3	45	39.555	43.851	3227.46	48.0744	0.110176	1.01237	0.483265	0.232327	0.000532442	0.00489243
U1338	A	5	H	5	120	38.405	44.105	3245.64	55.661	0.136199	0.847134	0.454599	0.253034	0.000619161	0.00385106
U1338	B	5	H	3	120	40.305	44.601	3283.32	64.1023	0.158973	0.55481	0.748796	0.479995	0.00119039	0.00415439
U1338	B	5	H	4	45	41.055	45.351	3331.28	60.4013	0.114241	0.831601	0.463526	0.279976	0.000529538	0.00385469
U1338	B	5	H	4	120	41.805	46.101	3389.47	66.3026	0.123651	0.691229	0.680357	0.451095	0.000841266	0.00470283
U1338	B	5	H	5	45	42.555	46.851	3441.54	71.1	0.0980047	0.560803	0.624887	0.444295	0.000612419	0.00350439
U1338	B	5	H	5	120	43.305	47.601	3501.16	67.631	0.172883	0.47136	0.366164	0.24764	0.000633034	0.00172595
U1338	B	5	H	6	45	44.055	48.351	3571.32	57.2142	0.091402	0.542657	0.466737	0.26704	0.000426607	0.00253278
U1338	B	5	H	6	120	44.805	49.101	3625.72	43.5229	0.141989	0.857666	0.978431	0.425842	0.00138926	0.00839167
U1338	A	6	H	3	45	44.155	49.715	3659.77	40.6318	0.174289	0.859576	0.634044	0.257624	0.00110507	0.00545009
U1338	B	5	H	7	45	45.555	49.851	3667.61	22.6091	0.241577	1.03203	0.607904	0.137442	0.00146856	0.00627378
U1338	B	6	H	1	45	46.055	51.2	3753.79	53.37	0.151961	0.942009	0.413877	0.220886	0.000628931	0.00389876
U1338	A	6	H	4	120	46.405	51.965	3804.14	48.621	0.138031	0.833584	0.525564	0.255535	0.000725441	0.00438102
U1338	B	6	H	2	120	48.305	53.45	3901.88	30.1064	0.219944	1.04369	0.544622	0.163966	0.00119786	0.00568419
U1338	B	6	H	3	120	49.805	54.95	4000.61	47.2148	0.146502	0.942511	0.433432	0.204644	0.000634985	0.00408515
U1338	B	6	H	4	120	51.305	56.45	4099.33		0.0982161	0.969119	0.484584		0.00047594	0.0046962
U1338	A	7	H	1	120	51.405	57.615	4175.73	65.2701	0.103184	0.784925	0.550651	0.35941	0.000568184	0.0043222
U1338	A	7	H	2	45	52.155	58.365	4218.55	55.8395	0.0979048	0.83058	0.893031	0.498664	0.000874319	0.00741733
U1338	A	7	H	2	120	52.905	59.115	4260.95	45.9372	0.140723	1.05473	0.894089	0.410719	0.00125819	0.00943023
U1338	A	7	H	3	45	53.655	59.865	4303.35	59.6458	0.106292	0.62778	0.882355	0.526287	0.000937868	0.00553924
U1338	A	7	H	3	120	54.405	60.615	4345.75	58.4895	0.0882816	0.676638	0.668367	0.390924	0.000590045	0.00452243
U1338	A	7	H	4	45	55.155	61.365	4388.15	69.7142	0.0762261	0.40459	0.869857	0.606414	0.000663058	0.00351935
U1338	A	7	H	4	120	55.905	62.115	4430.67	76.6328	0.0702236	0.345786	0.560917	0.429847	0.000393896	0.00193958
U1338	B	7	H	2	45	57.055	62.917	4478.34	60.3521	0.117366	0.599821	0.793617	0.478964	0.000931439	0.00476029
U1338	B	7	H	3	45	58.555	64.417	4562	61.5246	0.106879	0.597421	1.27602	0.785063	0.00136379	0.00762318
U1338	B	7	H	4	120	60.805	66.667	4641.49	65.9132	0.116115	0.372832	1.2353	0.814225	0.00143436	0.00460559
U1338	B	7	H	5	120	62.305	68.167	4695.31	58.77	0.150029	0.368966	1.46877	0.863199	0.00220359	0.00541928
U1338	A	8	H	1	45	60.155	68.235	4697.75	55.186	0.130758	0.314702	1.50671	0.831492	0.00197014	0.00474164
U1338	A	8	H	1	120	60.905	68.985	4724.66	73.018	0.0706667	0.404621	1.54354	1.12706	0.00109077	0.00624546
U1338	A	8	H	6	45	67.655	75.735	4983.27	74.0003	0.126095	0.333922	2.66614	1.97295	0.00336187	0.00890284
U1338	A	8	H	6	120	68.405	76.485	5003.35	60.8957	0.0728604	0.437383	2.03616	1.23994	0.00148356	0.00890583
U1338	A	9	H	1	45	69.655	79.105	5110.42	69.3241	0.0827669	0.267766	2.00581	1.39051	0.00166015	0.00537088
U1338	A	9	H	1	120	70.405	79.855	5141.1	73.1903	0.0839844	0.26043	1.64848	1.20653	0.00138446	0.00429312
U1338	A	9	H	6	45	77.155	86.605	5385.8	53.2717	0.199646	0.69525	1.53023	0.815181	0.00305505	0.010639
U1338	A	9	H	6	120	77.905	87.355	5411.14	71.0287	0.105898	0.268046	1.59874	1.13556	0.00169304	0.00428536
U1338	A	10	H	1	45	79.155	89.385	5479.71	60.496	0.114897	0.335304	1.9337	1.16981	0.00222176	0.00648376
U1338	A	10	H	1	120	79.905	90.135	5505.05	59.6457	0.141639	0.566368	1.53617	0.916258	0.00217581	0.00870037
U1338	A	10	H	2	45	80.655	90.885	5530.38	72.686	0.097371	0.417634	1.43973	1.04648	0.00140188	0.0060128
U1338	A	10	H	2	120	81.405	91.635	5553.09	41.6704	0.205871	0.871818	2.12548	0.885694	0.00437573	0.0185303
U1338	A	10	H	3	45	82.155	92.385	5574.43	55.7939	0.152471	0.474965	2.01276	1.123	0.00306888	0.00955989
U1338	A	10	H	3	120	82.905	93.135	5595.78	54.4691	0.223295	0.774658	1.88426	1.02634	0.00420746	0.0145966
U1338	A	10	H	4	45	83.655	93.885	5617.02	69.494	0.130683	0.359853	2.01021	1.39697	0.002627	0.00723379
U1338	A	10	H	4	120	84.405	94.635	5637.91	70.6592	0.143451	0.427637	2.00375	1.41584	0.0028744	0.0085688
U1338	A	10	H	5	45	85.155	95.385	5658.78	75.9395	0.10669	0.387255	2.28439	1.73475	0.00243721	0.0088464
U1338	A	10	H	5	120	85.905	96.135	5679.65	61.2031	0.154182	0.486002	1.78232	1.09084	0.00274803	0.00866213
U1338	A	10	H	6	45	86.655	96.885	5700.53	61.4952	0.093617	0.45762	2.51268	1.54518	0.0023523	0.0114985
U1338	B	10	H	4	120	89.305	98.305	5742.46	67.2798	0.216053	0.44054	1.57365	1.05875	0.00339991	0.00693254
U1338	A	11	H	1	45	88.655	99.685	5791.12	41.2399	0.248892	0.643021	1.69833	0.700389	0.00422701	0.0109206
U1338	A	11	H	1	120	89.405	100.435	5817.56	52.6416	0.179786	0.877529	1.79775	0.946362	0.0032321	0.0157757
U1338	A	11	H	2	45	90.155	101.185	5844.01	53.2583	0.193517	0.483985	1.79852	0.95786	0.00348043	0.00870454
U1338	A	11	H	2	120	90.905	101.935	5870.45	56.4059	0.174622	0.371367	2.04138	1.15146	0.00356469	0.00758099
U1338	A	11	H	3	45	91.655	102.685	5896.9	54.4209	0.137083	0.409512	1.52212	0.828353	0.00208657	0.00623328
U1338	A	11	H	3	120	92.405	103.435	5923.34	71.7063	0.0671168	0.433578	2.1005	1.50619	0.00140979	0.00910731
U1338	A	11	H	4	45	93.155	104.185	5954.45	50.9878	0.125472	0.783635	1.01485	0.517448	0.00127334	0.00795269
U1338	B	11	H	2	120	95.805	105.679	6010.08	82.6035	0.0935302	0.215196	1.57487	1.30089	0.00147298	0.00338905
U1338	B	11	H	3	120	97.305	107.179	6055.92	80.7397	0.122927	0.292132	1.71545	1.38505	0.00210875	0.00501138
U1338	B	11	H	4	120	98.805	108.679	6102.82	74.1536	0.142119	0.252356	2.05637	1.52487	0.00292249	0.00518937
U1338	B	11	H	5	120	100.305	110.179	6144.83	73.3559	0.103288	0.226412	2.20282	1.6159	0.00227526	0.00498745
U1338	B	11	H	6	120	101.805	111.679	6181.43	78.5374	0.0372766	0.193082	2.8385	2.22928	0.0010581	0.00548062
U1338	A	12	H	2	45	99.655	112.005	6189.39	70.5263	0.182688	0.303235	3.02999	2.13694	0.00553545	0.00918799
U1338	A	12	H	2	120	100.405	112.755	6207.69	81.7946	0.0717308	0.257539	2.82113	2.30753	0.00202362	0.00726551
U1338	A	12	H	3	45	101.155	113.505	6226.52	54.8531	0.153786	0.261904	2.88795	1.58413	0.00444126	0.00756366
U1338	A	12	H	3	120	101.905	114.255	6247.48	78.3157	0.093076	0.25	2.61448	2.04755	0.00243345	0.00653619
U1338	B	12	H	2	45	104.555	115.6	6285.47	83.376	0.0600551	0.319489	2.31089	1.92673	0.00138781	0.00738304
U1338	B	12	H	3	45	106.055	117.1	6314.63	82.2586	0.0717205	0.294101	4.40807	3.62602	0.00316149	0.0129642
U1338	B	12	H	4	45	107.555	118.6	6338.25	83.8436	0.0717317	0.316502	4.20588	3.52636	0.00301695	0.0133117
U1338	B	12	H	5	45	109.055	120.1	6371.35	72.9232	0.0892272	0.329078	3.16921	2.31109	0.0028278	0.0104292
U1338	B	12	H	5	120	109.805	120.85	6388.79	69.3125	0.110106	0.635364	2.73472	1.8955	0.00301108	0.0173754
U1338	A	13	H	1	45	107.655	121.375	6405.96	59.8467	0.0952849	0.355011	2.41575	1.44575	0.00230185	0.0085762
U1338	B	12	H	6	45	110.555	121.6	6413.79	68.9578	0.100466	0.299921	2.4294	1.67526	0.00244073	0.00728628
U1338	A	13	H	1	120	108.405	122.125	6432.53	60.4383	0.108098	0.307949	2.24876	1.35911	0.00243085	0.00692504
U1338	B	12	H	6	120	111.305	122.35	6441.61	68.615	0.152489	0.283879	1.92285	1.31936	0.00293213	0.00545856
U1338	A	13	H	2	45	109.155	122.875	6462.82	62.8786	0.119175	0.421561	2.18232	1.37221	0.00260078	0.0091998
U1338	A	13	H	2	120	109.905	123.625	6486.71	56.717	0.106815	0.322952	2.65403	1.50529	0.00283489	0.00857125
U1338	A	13	H	3	45	110.655	124.375	6509.03	50.6871	0.101149	0.629876	2.59456	1.31511	0.00262438	0.0163425
U1338	B	13	H	1	45	112.555	124.976	6526.91	76.8875	0.0885624	0.374743	2.47966	1.90655	0.00219605	0.00929235
U1338	A	13	H	3	120	111.405	125.125	6531.35	71.4439	0.12777	0.334138	2.45211	1.75188	0.00313306	0.00819341
U1338	B	13	H	1	120	113.305	125.726	6549.23	73.4278	0.115441	0.350189	2.71904	1.99653	0.0031389	0.0095218
U1338	B	13	H	2	45	114.055	126.476	6582.87	59.4003	0.0874894	0.484285	1.92446	1.14314	0.0016837	0.00931988
U1338	B	13	H	2	120	114.805	127.226	6606.6	66.4905	0.134135	0.502127	2.47308	1.64436	0.00331727	0.012418
U1338	B	13	H	3	45	115.555	127.976	6628.57	60.2524	0.15538	0.318767	2.10848	1.27041	0.00327617	0.00672115
U1338	B	13	H	3	120	116.305	128.726	6650.54	75.2169	0.0672616	0.304716	2.2499	1.6923	0.00151332	0.00685581
U1338	B	13	H	4	45	117.055	129.476	6672.17	52.2161	0.151671	0.237048	2.43207	1.26993	0.00368873	0.00576516
U1338	B	13	H	4	120	117.805	130.226	6689.35	58.9672	0.104948	0.310979	3.1283	1.84467	0.00328309	0.00972837
U1338	B	13	H	5	45	118.555	130.976	6705.22	70.362	0.0790848	0.322076	3.12801	2.20093	0.00247378	0.0100745
U1338	B	13	H	5	120	119.305	131.726	6721.08	50.0828	0.255869	0.25057	2.61227	1.3083	0.00668401	0.00654558
U1338	C	14	H	1	122	119.025	131.753	6721.66	44.0889	0.197376	0.255725	2.61845	1.15444	0.00516817	0.00669603
U1338	C	14	H	2	47	119.775	132.503	6737.53	54.0234	0.0462054	0.317372	2.65377	1.43366	0.00122618	0.00842232
U1338	C	14	H	3	47	121.275	134.003	6766.64	65.7189	0.0762214	0.250909	3.08805	2.02943	0.00235375	0.00774817
U1338	C	14	H	3	122	122.025	134.753	6780.23	38.9605	0.101087	0.551995	3.17453	1.23682	0.00320905	0.0175233
U1338	C	14	H	4	47	122.775	135.503	6793.6	64.3439	0.0624905	0.385022	3.23734	2.08303	0.00202303	0.0124645
U1338	C	14	H	4	122	123.525	136.253	6806.41	49.7162	0.0647282	0.266751	3.4996	1.73987	0.00226523	0.00933522
U1338	B	14	H	2	45	123.555	136.609	6812.46	58.4312	0.122509	0.344734	3.67332	2.14637	0.00450015	0.0126632
U1338	B	14	H	2	120	124.305	137.359	6825.23	58.9704	0.0851293	0.277186	3.79822	2.23983	0.0032334	0.0105281
U1338	B	14	H	3	45	125.055	138.109	6837.99	64.3044	0.132281	0.245319	3.40218	2.18775	0.00450044	0.00834621
U1338	B	14	H	3	120	125.805	138.859	6850.48	55.3628	0.160041	0.271459	3.51625	1.94669	0.00562746	0.00954518
U1338	B	14	H	4	45	126.555	139.609	6862.51	56.3316	0.0817108	0.266052	3.87081	2.18049	0.00316287	0.0102984
U1338	B	14	H	4	120	127.305	140.359	6874.54	56.7134	0.140419	0.237672	3.51013	1.99071	0.00492888	0.0083426
U1338	B	14	H	5	45	128.055	141.109	6885	53.9785	0.102947	0.222433	4.25795	2.29838	0.00438343	0.00947108
U1338	B	14	H	5	120	128.805	141.859	6893.6	38.3764	0.245138	0.2478	5.2152	2.0014	0.0127844	0.0129233
U1338	B	14	H	6	45	129.555	142.609	6901.51	59.1572	0.150709	0.205136	5.60317	3.31467	0.00844445	0.0114941
U1338	A	15	H	2	45	128.155	143.155	6907.26	66.3342	0.162284	0.330489	5.21412	3.45874	0.00846168	0.0172321
U1338	B	14	H	6	120	130.305	143.359	6909.42	71.7292	0.134965	0.281505	5.06876	3.63578	0.00684106	0.0142688
U1338	A	15	H	2	120	128.905	143.905	6915.42	66.1881	0.182612	0.234876	4.36581	2.88965	0.00797249	0.0102542
U1338	A	15	H	3	45	129.655	144.655	6926.52	63.4634	0.0787763	0.399684	3.48249	2.21011	0.00274338	0.013919
U1338	A	15	H	3	120	130.405	145.405	6941.09	73.7547	0.110629	0.272102	3.06332	2.25934	0.00338892	0.00833537
U1338	A	15	H	4	45	131.155	146.155	6955.68	74.4877	0.121523	0.230091	2.53005	1.88457	0.00307459	0.00582141
U1338	A	15	H	4	120	131.905	146.905	6972.05	89.6342	0.0656049	0.248081	2.31226	2.07257	0.00151695	0.00573627
U1338	B	15	H	2	45	133.055	147.402	6985.22			0.315176	1.83442			0.00578165
U1338	A	15	H	5	45	132.655	147.655	6993.94	83.0643	0.0910152	0.230331	1.58761	1.31873	0.00144496	0.00365674
U1338	B	15	H	3	45	134.555	148.902	7036.18	80.9872	0.0538129	0.223474	1.94538	1.57551	0.00104686	0.00434742
U1338	B	15	H	4	45	136.055	150.402	7069.52	77.5382	0.107548	0.22557	2.3298	1.80649	0.00250566	0.00525533
U1338	B	15	H	5	45	137.555	151.902	7099.74	81.6027	0.0579458	0.212959	2.91515	2.37884	0.00168921	0.00620807
U1338	A	16	H	1	120	136.905	152.965	7120.59	79.3986	0.100216	0.184464	3.61362	2.86916	0.00362143	0.00666581
U1338	A	16	H	2	45	137.655	153.715	7133.77	70.4032	0.0679166	0.253573	4.11183	2.89486	0.00279262	0.0104265
U1338	A	16	H	2	120	138.405	154.465	7146.58	75.7104	0.0818059	0.235185	3.8883	2.94385	0.00318086	0.00914472
U1338	A	16	H	3	45	139.155	155.215	7159.72	73.9299	0.0669782	0.164434	3.90307	2.88554	0.00261421	0.00641797
U1338	A	16	H	3	120	139.905	155.965	7174.15	74.9672	0.0911931	0.331672	4.34889	3.26024	0.00396589	0.0144241
U1338	A	16	H	4	45	140.655	156.715	7188.61	70.2883	0.100926	0.31738	4.37948	3.07826	0.00442004	0.0138996
U1338	A	16	H	4	120	141.405	157.465	7207.37	70.4233	0.109952	0.283178	3.36577	2.37029	0.00370072	0.00953114
U1338	A	16	H	5	45	142.155	158.215	7228.01	53.9166	0.149775	0.23876	3.40052	1.83345	0.00509315	0.0081191
U1338	A	16	H	5	120	142.905	158.965	7246.02	68.586	0.1062	0.297473	4.00668	2.74802	0.00425509	0.0119188
U1338	B	16	H	3	45	144.055	160.134	7267.18	75.7912	0.0848826	0.272703	4.18314	3.17045	0.00355076	0.0114076
U1338	B	16	H	4	45	145.555	161.634	7297.63	72.2934	0.149196	0.333411	3.49139	2.52405	0.00520902	0.0116407
U1338	B	16	H	5	45	147.055	163.134	7333.58	64.8924	0.130622	0.405997	3.09142	2.0061	0.00403808	0.0125511
U1338	B	16	H	6	45	148.555	164.634	7374	78.2349	0.112319	0.319863	2.8222	2.20794	0.00316986	0.00902717
U1338	A	17	H	2	45	147.155	165.235	7390.8	80.9165	0.0922339	0.272912	2.80231	2.26753	0.00258468	0.00764784
U1338	A	17	H	2	120	147.905	165.985	7411.76			0.274297	2.64195			0.00724678
U1338	A	17	H	2	121	148.915	166.995	7442.58			0.311288	1.81994			0.00566526
U1338	A	17	H	3	120	149.405	167.485	7463.25			0.567832	1.56686			0.00889714
U1338	B	17	H	1	120	151.305	168.492	7509.84	77.4691	0.0934398	0.475561	1.39017	1.07695	0.00129897	0.00661109
U1338	A	17	H	4	120	150.905	168.985	7529.23			0.315003	2.27263			0.00715887
U1338	B	17	H	2	120	152.805	169.992	7553.96	83.1732	0.0647752	0.436897	2.80751	2.3351	0.00181857	0.0122659
U1338	B	17	H	3	120	154.305	171.492	7596.83	83.3898	0.0874214	0.216981	1.87475	1.56335	0.00163894	0.00406786
U1338	B	17	H	4	120	155.805	172.992	7645.81	45.6955	0.243295	0.453846	2.02832	0.92685	0.0049348	0.00920544
U1338	B	17	H	5	120	157.305	174.492	7707.42	49.3362	0.131049	0.400886	2.25995	1.11497	0.00296165	0.00905983
U1338	A	18	H	2	45	156.655	175.935	7747.43	52.9799	0.136017	0.513041	2.97601	1.57668	0.00404788	0.0152681
U1338	A	18	H	3	45	158.155	177.435	7815.22	66.5955	0.097371	0.487716	2.07353	1.38088	0.00201901	0.0101129
U1338	A	18	H	3	120	158.905	178.185	7839.86	49.0509	0.152962	0.444976	2.3535	1.15441	0.00359995	0.0104725
U1338	A	18	H	4	45	159.655	178.935	7869.06	54.2155	0.155463	0.521764	1.28746	0.698003	0.00200152	0.00671749
U1338	A	18	H	4	120	160.405	179.685	7909.63	67.3224	0.116532	0.48912	1.32033	0.888879	0.0015386	0.00645801
U1338	A	18	H	5	45	161.155	180.435	7949.28	70.2941	0.116374	0.441956	1.29873	0.912927	0.00151138	0.00573979
U1338	A	18	H	5	120	161.905	181.185	7988.3	83.2239	0.0726149	0.503553	1.53093	1.2741	0.00111168	0.00770903
U1338	A	18	H	6	45	162.655	181.935	8025.41	79.8349	0.0923195	0.2503	1.41472	1.12944	0.00130606	0.00354105
U1338	A	19	H	1	120	165.405	185.605	8154.24	80.9572	0.0750644	0.38744	1.87877	1.521	0.00141029	0.0072791
U1338	A	19	H	2	45	166.155	186.355	8174.55	77.3059	0.0740813	0.37527	1.34705	1.04135	0.000997909	0.00505507
U1338	A	19	H	2	120	166.905	187.105	8206.76	74.182	0.0842105	0.270676	1.25458	0.930675	0.00105649	0.00339586
U1338	A	19	H	3	45	167.655	187.855	8246.22	81.2724	0.0887379	0.30396	1.77789	1.44494	0.00157766	0.00540408
U1338	A	19	H	3	120	168.405	188.605	8274.69	81.2488	0.0652003	0.35932	2.48613	2.01995	0.00162096	0.00893316
U1338	A	19	H	4	45	169.155	189.355	8296.64	72.6561	0.0979421	0.353982	2.86963	2.08496	0.00281058	0.010158
U1338	A	19	H	4	120	169.905	190.105	8318.99	77.0949	0.0813276	0.377973	1.97966	1.52622	0.00161001	0.00748257
U1338	A	19	H	5	45	170.655	190.855	8353.75	73.8398	0.0594117	0.474104	1.50099	1.10833	0.000891761	0.00711624
U1338	A	19	H	5	120	171.405	191.605	8379.94	76.5395	0.0679612	0.328525	2.57153	1.96823	0.00174764	0.00844811
U1338	A	19	H	6	45	172.155	192.355	8405.22	69.7153	0.0810078	0.596296	2.27466	1.58578	0.00184265	0.0135637
U1338	B	19	H	6	45	177.055	195.203	8492.89	82.9974	0.0679451	0.259895	1.87317	1.55468	0.00127273	0.00486827
U1338	A	20	H	1	120	174.905	195.695	8519.56	78.3708	0.0701214	0.27988	1.57926	1.23768	0.0011074	0.00442003
U1338	A	20	H	2	45	175.655	196.445	8560.18	84.2252	0.0593518	0.602516	2.37808	2.00294	0.00141143	0.0143283
U1338	A	20	H	2	120	176.405	197.195	8578.84	78.3874	0.0675073	0.277308	3.24803	2.54605	0.00219266	0.00900707
U1338	A	20	H	3	45	177.155	197.945	8602.94	58.2947	0.140887	0.300111	1.83788	1.07139	0.00258933	0.00551569
U1338	A	20	H	3	120	177.905	198.695	8650.72	66.1502	0.0879358	0.356882	0.886957	0.586723	0.000779952	0.00316539
U1338	A	20	H	4	45	178.655	199.445	8694.8	36.3917	0.283407	1.08881	1.31402	0.478193	0.00372402	0.0143071
U1338	A	20	H	4	120	179.405	200.195	8726.93	42.8705	0.127856	0.881808	1.03664	0.444412	0.0013254	0.00914117
U1338	A	20	H	5	45	180.155	200.945	8769.41	67.3624	0.0847391	0.506615	1.54163	1.03848	0.00130637	0.00781015
U1338	A	20	H	5	120	180.905	201.695	8795.39	73.0179	0.0827891	0.52364	2.27369	1.6602	0.00188237	0.011906
U1338	B	20	H	4	45	183.555	203.18	8837.72	68.2244	0.0754243	0.381682	2.43914	1.66409	0.0018397	0.00930976
U1338	B	20	H	6	45	186.555	206.18	8943.9	67.1014	0.0446103	0.493141	1.39952	0.9391	0.000624332	0.00690163
U1338	A	21	H	1	120	184.405	206.495	8959.98	50.8194	0.0921205	0.429672	2.17319	1.1044	0.00200195	0.00933758
U1338	A	21	H	2	45	185.155	207.245	8980.18	56.1109	0.073875	0.719572	2.08708	1.17108	0.00154183	0.0150181
U1338	A	21	H	2	120	185.905	207.995	9008.23	61.3893	0.08	0.493236	1.42276	0.873423	0.00113821	0.00701757
U1338	A	21	H	3	45	186.655	208.745	9050.81	48.052	0.0807805	0.746336	0.853764	0.41025	0.000689675	0.00637195
U1338	A	21	H	3	120	187.405	209.495	9101.11	65.6883	0.0732953	0.679958	1.04831	0.688617	0.000768363	0.00712808
U1338	A	21	H	4	45	188.155	210.245	9130.34	65.9769	0.0574163	0.817954	2.3898	1.57672	0.00137214	0.0195475
U1338	A	21	H	4	120	188.905	210.995	9149.43	57.8179	0.0599124	0.77433	2.50349	1.44747	0.0014999	0.0193853
U1338	A	21	H	5	45	189.655	211.745	9171.5	57.7316	0.0548515	0.324342	1.64837	0.951631	0.000904155	0.00534635
U1338	A	21	H	5	120	190.405	212.495	9231.68	65.9091	0.0539851	0.459261	0.490978	0.323599	0.000265055	0.00225487
U1338	A	21	H	6	45	191.155	213.245	9308.12	64.3096	0.0400632	0.407257	0.84053	0.540541	0.000336743	0.00342311
U1338	B	21	H	4	120	193.805	214.056	9354.25	64.5034	0.0374945	0.444918	1.85652	1.19752	0.000696092	0.00825998
U1338	B	21	H	5	120	195.305	215.556	9433.25	59.6525	0.0803925	0.501866	1.19191	0.711005	0.000958209	0.00598181
U1338	A	22	H	1	45	193.155	216.505	9491.1	56.6846	0.041165	0.645564	1.38903	0.787364	0.000571794	0.00896707
U1338	B	21	H	6	120	196.805	217.056	9510.19	57.6	0.111198	0.406949	1.73872	1.0015	0.00193342	0.00707568
U1338	A	22	H	1	120	193.905	217.255	9516.6	42.6687	0.0595636	0.359732	1.78978	0.763675	0.00106606	0.00643841
U1338	A	22	H	2	45	194.655	218.005	9554.61	48.4512	0.0476569	0.847578	0.673752	0.32644	0.000321089	0.00571057
U1338	A	22	H	2	120	195.405	218.755	9620.84	60.2384	0.0449438	0.438853	0.98651	0.594258	0.000443375	0.00432933
U1338	A	22	H	3	45	196.155	219.505	9653.51	43.3568	0.076938	0.400001	1.40304	0.608316	0.00107947	0.00561219
U1338	A	22	H	3	120	196.905	220.255	9681.66	37.8747	0.0617922	0.876912	1.58534	0.600442	0.000979615	0.013902
U1338	B	22	H	2	120	200.305	221.375	9718.94	27.4156	0.110991	0.913988	1.07207	0.293915	0.0011899	0.0097986
U1338	B	22	H	3	120	201.805	222.875	9786.22	67.7436	0.0256812	0.555891	1.46774	0.994299	0.000376933	0.00815903
U1338	B	22	H	4	120	203.305	224.375	9824.22	76.3671	0.0724516	0.643223	2.19444	1.67583	0.00158991	0.0141151
U1338	B	22	H	5	120	204.805	225.875	9861.16	35.6597	0.12153	1.04916	2.20827	0.787462	0.00268371	0.0231683
U1338	A	23	H	1	45	202.655	227.295	9898.08	52.3723	0.0286448	0.668303	2.7024	1.41531	0.000774098	0.0180602
U1338	A	23	H	1	120	203.405	228.045	9913.98	54.1792	0.0292086	0.520091	2.40383	1.30237	0.000702125	0.0125021
U1338	A	23	H	2	45	204.155	228.795	9937.19	46.9709	0.0500982	0.334794	1.80503	0.847836	0.000904286	0.00604311
U1338	A	23	H	2	120	204.905	229.545	9965.9	64.645	0.0315934	0.906389	1.74871	1.13046	0.000552478	0.0158501
U1338	A	23	H	3	45	205.655	230.295	9987.95	64.2488	0.0276789	0.445833	2.27987	1.46479	0.000631045	0.0101644
U1338	A	23	H	3	120	206.405	231.045	10008.6	51.1447	0.0448656	0.443798	2.16485	1.10721	0.000971274	0.00960757
U1338	B	23	H	2	45	209.055	232.096	10038.6	59.4698	0.0337445	0.612341	2.03257	1.20877	0.000685881	0.0124463
U1338	B	23	H	3	45	210.555	233.596	10078.6	75.2396	0.0696429	0.516089	2.7155	2.04313	0.00189115	0.0140144
U1338	B	23	H	5	45	213.555	236.596	10159.1	52.4037	0.0314193	0.293736	1.94318	1.0183	0.000610533	0.00570782
U1338	B	23	H	6	45	215.055	238.096	10213.7	21.5021	0.149243	0.266074	1.53554	0.330174	0.00229169	0.00408569
U1338	A	24	H	1	45	212.155	238.635	10229.9	42.7164	0.14548	0.416507	1.97796	0.844912	0.00287753	0.00823834
U1338	A	24	H	1	120	212.905	239.385	10247.5	51.5341	0.0540223	0.364869	2.43193	1.25328	0.00131379	0.00887337
U1338	A	24	H	2	45	213.655	240.135	10263.3	46.4226	0.0775896	0.344426	2.25995	1.04913	0.00175348	0.00778385
U1338	A	24	H	2	120	214.405	240.885	10282.2	52.1082	0.0854989	0.330416	1.92837	1.00484	0.00164874	0.00637166
U1338	A	24	H	3	45	215.155	241.635	10304.7	53.5578	0.0468781	0.362711	1.7712	0.948617	0.000830306	0.00642435
U1338	A	24	H	3	120	215.905	242.385	10327.4	61.8689	0.0316901	0.340169	1.75772	1.08748	0.000557025	0.00597924
U1338	A	24	H	4	45	216.655	243.135	10352.1	67.9378	0.0277286	0.871159	1.45654	0.989545	0.00040388	0.0126888
U1338	A	24	H	4	120	217.405	243.885	10399	42.4851	0.0270916	0.697983	0.729646	0.309991	0.000197673	0.0050928
U1338	B	24	H	3	45	220.055	244.719	10458.7	51.9857	0.0859069	0.335913	0.846577	0.440099	0.000727268	0.00284377
U1338	B	24	H	4	45	221.555	246.219	10563.2	46.8192	0.111857	0.348436	0.933535	0.437074	0.00104423	0.00325277
U1338	B	24	H	5	45	223.055	247.719	10632.1	65.0024	0.0663523	0.809145	1.5739	1.02307	0.00104432	0.0127351
U1338	B	24	H	6	45	224.555	249.219	10681.7	48.9797	0.074097	0.783243	1.7597	0.861897	0.00130389	0.0137827
U1338	A	25	H	1	120	222.405	249.885	10707.1	75.1789	0.0255859	1.0376	2.25508	1.69534	0.000576983	0.0233987
U1338	A	25	H	2	45	223.165	250.645	10727.9	69.6261	0.0312251	0.531355	3.14132	2.18717	0.00098088	0.0166916
U1338	A	25	H	2	120	223.915	251.395	10744.7	73.7992	0.0355685	0.503125	3.13142	2.31097	0.0011138	0.015755
U1338	A	25	H	3	45	224.675	252.155	10759.2	73.7992	0.0355685	0.465138	3.25847	2.40473	0.00115899	0.0151564
U1338	A	25	H	3	120	225.425	252.905	10782.8	74.1976	0.0361901	0.348877	2.28806	1.69769	0.000828051	0.0079825
U1338	A	25	H	4	45	226.185	253.665	10809.6	70.5223	0.0428182	0.34871	2.39685	1.69032	0.00102629	0.00835807
U1338	A	25	H	4	120	226.935	254.415	10831.1	67.2581	0.0603654	0.507651	2.10099	1.41308	0.00126827	0.0106657
U1338	A	25	H	5	45	227.685	255.165	10871.6	71.5615	0.0555775	0.536983	1.13	0.808646	0.000628026	0.00606791
U1338	A	25	H	5	120	228.435	255.915	10906.4	67.3145	0.0499119	0.482933	2.26601	1.52535	0.00113101	0.0109433
U1338	A	25	H	6	45	229.195	256.675	10930.1	76.0197	0.0428232	0.292918	2.96855	2.25668	0.00127123	0.00869543
U1338	B	25	H	4	45	231.055	257.169	10942.5	68.01	0.0507874	0.313022	3.14757	2.14066	0.00159857	0.00985259
U1338	A	25	H	6	120	229.945	257.425	10948.8	62.0207	0.0693244	0.292299	2.95964	1.83559	0.00205175	0.00865102
U1338	B	25	H	4	120	231.805	257.919	10961.1	47.3399	0.083506	0.390585	2.57994	1.22134	0.0021544	0.0100768
U1338	B	25	H	5	45	232.555	258.669	10983.9	63.6303	0.0623971	0.362917	1.78906	1.13838	0.00111632	0.0064928
U1338	B	25	H	5	120	233.305	259.419	11012.2	38.6977	0.124687	0.338168	1.69471	0.655816	0.00211309	0.00573097
U1338	B	25	H	6	45	234.055	260.169	11040.3	14.0524	0.205649	0.413034	1.29592	0.182108	0.00266504	0.00535258
U1338	A	26	H	2	45	232.655	260.635	11057.9	29.5405	0.126034	0.233158	1.1193	0.330646	0.00141069	0.00260973
U1338	A	26	H	2	120	233.405	261.385	11089.1	33.917	0.09	0.264467	0.995108	0.337511	0.000895597	0.00263173
U1338	A	26	H	3	45	234.155	262.135	11124.5	59.3954	0.0931907	0.538194	1.52353	0.904908	0.00141979	0.00819955
U1338	A	26	H	3	120	234.905	262.885	11145.9	72.5657	0.0311231	0.396284	3.19816	2.32077	0.000995368	0.0126738
U1338	A	26	H	4	45	235.655	263.635	11158.4	68.4221	0.0327358	0.447135	3.90521	2.67202	0.0012784	0.0174615
U1338	A	26	H	4	120	236.405	264.385	11172.6	59.57	0.0483242	0.42828	3.15471	1.87926	0.00152449	0.013511
U1338	A	26	H	5	45	237.155	265.135	11189.7	60.0725	0.0242317	0.485222	2.64396	1.58829	0.000640675	0.0128291
U1338	A	26	H	6	45	238.655	266.635	11234.4	66.0963	0.0279693	0.311044	1.90742	1.26073	0.000533491	0.00593291
U1338	C	27	H	2	122	240.025	266.836	11242.7	72.4364	0.047461	0.315378	1.73221	1.25475	0.000822126	0.00546301
U1338	A	26	H	6	120	239.405	267.385	11266.2	84.8317	0.0260346	0.310175	1.94307	1.64834	0.00050587	0.00602692
U1338	B	26	H	3	45	241.555	268.488	11322.1	83.8245	0.0529465	0.35987	1.6232	1.36064	0.000859429	0.00584143
U1338	C	27	H	4	47	242.275	269.086	11350	78.5915	0.0415898	0.302654	2.09366	1.64544	0.000870751	0.00633655
U1338	B	26	H	3	120	242.305	269.238	11356.4	75.696	0.0417661	0.424925	2.16761	1.64079	0.000905326	0.00921071
U1338	C	27	H	4	122	243.025	269.836	11381.4	75.7479	0.060589	0.418996	1.90672	1.4443	0.00115526	0.00798909
U1338	B	26	H	4	45	243.055	269.988	11387.8	65.8422	0.120592	0.348264	1.95481	1.28709	0.00235733	0.00680788
U1338	B	26	H	4	120	243.805	270.738	11418.3	63.2435	0.170071	0.272071	1.62177	1.02567	0.00275817	0.00441237
U1338	B	26	H	5	45	244.555	271.488	11450.5	71.1739	0.0681499	0.244771	1.4965	1.06512	0.00101986	0.00366299
U1338	B	26	H	5	120	245.305	272.238	11475.5	85.4116	0.0422868	0.273839	2.68118	2.29004	0.00113379	0.00734212
U1338	B	26	H	6	45	246.055	272.988	11497.1	86.1245	0.0438012	0.240118	3.40142	2.92946	0.00148986	0.00816743
U1338	B	26	H	6	120	246.805	273.738	11518.7	84.4921	0.040688	0.225574	3.45204	2.9167	0.00140457	0.00778689
U1338	C	28	H	1	47	247.275	274.086	11528.8	87.9202	0.0299365	0.279252	3.49007	3.06848	0.00104481	0.00974609
U1338	C	28	H	1	122	248.025	274.836	11550.3	85.9756	0.0315442	0.240829	4.02723	3.46243	0.00127036	0.00969875
U1338	C	28	H	2	47	248.775	275.586	11568	85.613	0.0310597	0.212275	4.57676	3.9183	0.00142153	0.00971533
U1338	C	28	H	2	122	249.525	276.336	11583.2	87.1473	0.0468501	0.231342	4.60388	4.01216	0.00215692	0.0106507
U1338	C	28	H	3	47	250.275	277.086	11600.6	78.5662	0.0472069	0.203777	4.0489	3.18107	0.00191136	0.00825073
U1338	C	28	H	3	122	251.025	277.836	11615.4	82.2679	0.0847619	0.227099	4.32218	3.55577	0.00366356	0.00981563
U1338	C	28	H	4	47	251.775	278.586	11630	85.0273	0.0457866	0.202564	4.52457	3.84712	0.00207165	0.00916515
U1338	C	28	H	4	122	252.525	279.336	11645.5	87.2806	0.031656	0.266024	4.58868	4.00503	0.00145259	0.012207
U1338	C	28	H	5	47	253.275	280.086	11663.4	83.1328	0.0282218	0.287063	4.55989	3.79076	0.00128688	0.0130897
U1338	C	28	H	5	122	254.025	280.836	11681.1	86.7499	0.0357372	0.280991	5.14734	4.46531	0.00183952	0.0144636
U1338	C	28	H	6	47	254.775	281.586	11694	82.9914	0.034067	0.260491	5.51464	4.57668	0.00187867	0.0143652
U1338	C	28	H	6	122	255.525	282.336	11708	73.6896	0.0575229	0.253376	4.86174	3.5826	0.00279661	0.0123185
U1338	C	28	H	7	47	256.275	283.086	11723.9	82.4031	0.0575032	0.309739	3.72386	3.06858	0.00214134	0.0115342
U1338	C	29	H	1	47	256.775	283.586	11737.5	79.4597	0.0306196	0.31752	4.05718	3.22382	0.00124229	0.0128823
U1338	C	29	H	1	122	257.525	284.336	11756.6	81.5831	0.0452261	0.360211	4.23042	3.45131	0.00191325	0.0152384
U1338	C	29	H	2	47	258.275	285.086	11773.7	79.8335	0.0558036	0.296097	4.24482	3.38879	0.00236876	0.0125688
U1338	B	28	H	1	45	257.555	285.202	11776.2	81.7943	0.0396096	0.288755	4.24325	3.47073	0.00168073	0.0122526
U1338	C	29	H	2	122	259.025	285.836	11789	86.0683	0.0349375	0.302734	4.51087	3.88243	0.00157598	0.0136559
U1338	B	28	H	1	120	258.305	285.952	11791.2	84.265	0.0435911	0.290336	4.57818	3.8578	0.00199568	0.0132921
U1338	B	28	H	2	45	259.055	286.702	11805.9	76.0985	0.0736842	0.283589	4.53542	3.45139	0.00334189	0.0128619
U1338	B	28	H	2	120	259.805	287.452	11821.2	75.8204	0.050507	0.28698	3.75149	2.8444	0.00189477	0.010766
U1338	B	28	H	3	45	260.555	288.202	11840.5	74.6836	0.0766252	0.356789	2.82256	2.10799	0.00216279	0.0100706
U1338	B	28	H	3	120	261.305	288.952	11867.4	73.8337	0.106447	0.321787	2.38134	1.75823	0.00253486	0.00766283
U1338	B	28	H	4	45	262.055	289.702	11893	78.5133	0.0553506	0.323883	3.29887	2.59005	0.00182594	0.0106845
U1338	B	28	H	4	120	262.805	290.452	11910.3	71.552	0.0573561	0.376507	4.07311	2.91439	0.00233618	0.0153356
U1338	B	28	H	5	45	263.555	291.202	11924.4	77.468	0.038982	0.311227	4.75422	3.683	0.00185329	0.0147964
U1338	B	28	H	5	120	264.305	291.952	11935.8	72.2199	0.0400328	0.288768	5.63043	4.06629	0.00225402	0.0162589
U1338	B	28	H	6	45	265.055	292.702	11946.6	71.1734	0.160046	0.353761	6.03614	4.29612	0.00966062	0.0213535
U1338	B	28	H	6	120	265.805	293.452	11957.1	81.8893	0.0439272	0.359701	6.16833	5.0512	0.00270957	0.0221875
U1338	A	29	X	4	45	264.355	293.665	11960.1	83.1607	0.0348656	0.357536	6.20085	5.15667	0.00216196	0.0221703
U1338	B	28	H	7	45	266.355	294.002	11965.1	77.6414	0.0362705	0.264501	5.9209	4.59707	0.00214754	0.0156608
U1338	A	29	X	4	120	265.105	294.415	11971.3	74.15	0.0358132	0.39525	5.57781	4.13594	0.00199759	0.0220463
U1338	A	29	X	5	45	265.855	295.165	11982.1	74.2827	0.0282021	0.440426	5.01095	3.72227	0.0014132	0.0220695
U1338	A	29	X	5	120	266.605	295.915	11991.7	51.7713	0.0398755	0.303188	4.64345	2.40398	0.0018516	0.0140784
U1338	B	29	H	1	120	267.805	296.005	11992.8	39.6278	0.0249528	0.322294	4.59935	1.82262	0.00114767	0.0148234
U1338	B	29	H	2	120	269.305	297.505	12013.4	73.0034	0.0605361	0.337041	5.48293	4.00272	0.00331915	0.0184797
U1338	B	29	H	3	120	270.805	299.005	12035.3	82.1836	0.0419195	0.451795	6.34745	5.21656	0.00266082	0.0286774
U1338	B	29	H	4	120	272.305	300.505	12056.9	75.0125	0.0425226	0.321011	7.53918	5.65532	0.00320586	0.0242016
U1338	B	29	H	5	45	273.055	301.255	12065.3	74.4341	0.0793169	0.431497	7.61319	5.66681	0.00603854	0.0328506
U1338	B	29	H	5	120	273.805	302.005	12072.7	71.0663	0.0609216	0.325388	7.43846	5.28624	0.00453163	0.0242039
U1338	B	29	H	6	45	274.555	302.755	12080.2	63.3151	0.0590171	0.361848	7.28412	4.61195	0.00429888	0.0263574
U1338	B	29	H	6	120	275.305	303.505	12087.6	76.6002	0.0443454	0.362672	7.99716	6.12584	0.00354637	0.0290035
U1338	C	31	H	1	47	275.775	304.698	12099.4	79.9713	0.0718657	0.315236	9.13136	7.30247	0.00656232	0.0287853
U1338	C	31	H	1	122	276.525	305.448	12106.2	80.8407	0.0415147	0.315422	9.02953	7.29953	0.00374858	0.0284811
U1338	C	31	H	2	47	277.275	306.198	12113	78.6345	0.050457	0.332966	8.84974	6.95895	0.00446532	0.0294667
U1338	C	31	H	2	122	278.025	306.948	12119.9	75.7223	0.0685552	0.282146	8.66996	6.56509	0.00594371	0.0244619
U1338	C	31	H	3	47	278.775	307.698	12129.3	81.5207	0.0478953	0.263528	8.57474	6.99019	0.00410689	0.0225969
U1338	C	31	H	3	122	279.525	308.448	12138.7	81.3378	0.0566507	0.260325	8.48117	6.8984	0.00480465	0.0220786
U1338	C	31	H	4	47	280.275	309.198	12147.7	80.0583	0.0395706	0.311886	7.87377	6.30361	0.00311569	0.0245572
U1338	C	31	H	4	122	281.025	309.948	12156.5	76.2154	0.0641026	0.279874	7.18784	5.47824	0.00460759	0.0201169
U1338	C	31	H	5	47	281.775	310.698	12167	68.5906	0.0895898	0.303226	5.801	3.97894	0.00519711	0.0175902
U1338	C	31	H	5	122	282.525	311.448	12178.7	41.7746	0.325565	0.223089	3.95666	1.65288	0.0128815	0.00882686
U1338	C	32	H	1	47	283.375	312.298	12198.1	55.4096	0.123491	0.206891	2.63436	1.45969	0.0032532	0.00545025
U1338	C	32	H	1	122	284.125	313.048	12219.6	78.9741	0.0495795	0.329208	3.06836	2.42321	0.00152128	0.0101013
U1338	B	32	H	1	45	283.355	313.377	12229.4	71.8107	0.0654949	0.271796	4.05417	2.91133	0.00265528	0.0110191
U1338	B	32	H	1	120	284.105	314.127	12245.3	78.7489	0.0438757	0.448535	5.46614	4.30453	0.00239831	0.0245176
U1338	B	32	H	2	45	284.855	314.877	12255.3	57.7999	0.08657	0.36749	6.05865	3.50189	0.00524497	0.0222649
U1338	B	32	H	2	120	285.605	315.627	12264.4	64.2238	0.0590032	0.379257	6.21345	3.99052	0.00366614	0.0235649
U1338	B	32	H	3	45	286.355	316.377	12272.8	81.595	0.0411537	0.373768	5.9731	4.87375	0.00245815	0.0223255
U1338	B	32	H	4	45	287.855	317.877	12304.5	81.9223	0.0441075	0.18432	3.49428	2.8626	0.00154124	0.00644066
U1338	C	33	H	1	47	292.875	322.317	12439.9	88.497	0.0456532	0.207591	2.89516	2.56213	0.00132173	0.00601011
U1338	C	33	H	1	122	293.625	323.067	12476.7	81.8227	0.0683654	0.324048	2.55033	2.08675	0.00174354	0.00826428
U1338	B	33	H	2	45	294.355	324.757	12535.6	79.4373	0.0352083	0.308873	2.38045	1.89096	0.000838116	0.00735256
U1338	B	33	H	3	45	295.855	326.257	12585.5	88.4127	0.0325387	0.254056	3.7213	3.2901	0.00121087	0.0094542
U1338	B	33	H	6	45	300.355	330.757	12708.9	75.1226	0.0494268	0.316675	3.84784	2.89059	0.00190186	0.0121851
U1338	A	33	X	1	45	298.155	331.475	12724.7	72.2125	0.0394942	0.386821	3.56994	2.57794	0.00140992	0.0138093
U1338	B	33	H	6	120	301.105	331.507	12725.7	80.3381	0.0374243	0.362045	3.53557	2.84041	0.00132316	0.0128004
U1338	A	33	X	1	120	298.905	332.225	12747.3	75.9881	0.0341597	0.473965	2.6593	2.02075	0.000908409	0.0126042
U1338	B	34	H	1	45	302.355	333.786	12789.5	79.0825	0.0452902	0.42965	4.5095	3.56623	0.00204236	0.0193751
U1338	B	34	H	2	45	303.865	335.296	12816.3	71.2507	0.066223	0.442867	4.43056	3.15681	0.00293405	0.0196215
U1338	B	34	H	3	45	305.365	336.796	12854.5	81.7459	0.0410664	0.373928	3.46609	2.83339	0.0014234	0.0129607
U1338	B	34	H	4	45	306.875	338.306	12892.4	78.352	0.0383303	0.341052	3.9615	3.10391	0.00151845	0.0135108
U1338	C	35	H	1	47	307.375	339.455	12924.3	83.3019	0.0514673	0.309123	3.19275	2.65962	0.00164322	0.00986954
U1338	C	35	H	1	123	308.135	340.215	12947	86.3075	0.0395928	0.435371	3.19916	2.76112	0.00126664	0.0139282
U1338	C	35	H	2	47	308.875	340.955	12971.9	83.4507	0.0502629	0.319341	3.4607	2.88798	0.00173945	0.0110515
U1338	C	35	H	2	122	309.625	341.705	12992.6	77.0773	0.0584388	0.261496	3.64674	2.81081	0.00213111	0.00953606
U1338	C	35	H	3	47	310.385	342.465	13015.8	82.2248	0.0414641	0.417596	2.60631	2.14304	0.00108068	0.0108839
U1338	C	35	H	3	122	311.135	343.215	13051.6	84.0546	0.0447054	0.322185	1.93977	1.63047	0.000867184	0.00624965
U1338	C	35	H	4	47	311.905	343.985	13100.2	80.1343	0.0573164	0.311622	1.22191	0.979172	0.000700357	0.00380775
U1338	C	35	H	4	122	312.655	344.735	13151.6	82.4577	0.0372981	0.354688	2.42972	2.00349	0.000906239	0.00861794
U1338	C	35	H	5	47	313.405	345.485	13179.8	76.0208	0.0620518	0.442806	2.35685	1.7917	0.00146247	0.0104363
U1338	B	35	H	2	45	313.355	346.131	13212.4	84.4261	0.0402553	0.389918	2.02297	1.70791	0.00081435	0.0078879
U1338	C	35	H	5	122	314.155	346.235	13218.9	85.9834	0.043648	0.447264	2.05398	1.76608	0.000896521	0.00918672
U1338	B	35	H	2	120	314.105	346.881	13241.6	85.5244	0.03	0.376002	3.60423	3.0825	0.00108127	0.013552
U1338	B	35	H	3	120	315.605	348.381	13276.6	74.1618	0.0538313	0.319758	3.49261	2.59019	0.00188012	0.0111679
U1338	C	36	H	1	47	316.875	350.343	13349	75.9954	0.0543038	0.371759	3.27991	2.49258	0.00178111	0.0121933
U1338	C	36	H	1	122	317.625	351.093	13367.7	75.4453	0.0775253	0.306125	3.89119	2.93572	0.00301666	0.0119119
U1338	C	36	H	2	48	318.385	351.853	13385.3	74.9446	0.0982022	0.28538	4.38991	3.29	0.00431099	0.0125279
U1338	C	36	H	2	122	319.125	352.593	13401.3	81.6471	0.0521232	0.354866	5.2914	4.32028	0.00275805	0.0187774
U1338	C	36	H	3	47	319.875	353.343	13414.1	85.5484	0.0603363	0.28646	5.96224	5.10059	0.00359739	0.0170794
U1338	C	36	H	3	122	320.625	354.093	13426.3	83.2057	0.0625	0.285298	5.96405	4.96243	0.00372753	0.0170153
U1338	C	36	H	4	47	321.375	354.843	13438	83.6259	0.0331456	0.237213	5.40595	4.52078	0.00179184	0.0128236
U1338	B	36	H	2	120	323.605	356.642	13485.4	80.0273	0.0468881	0.462691	4.44948	3.5608	0.00208628	0.0205873
U1338	B	36	H	3	122	325.115	358.152	13515.3	78.291	0.064313	0.344728	3.95423	3.09581	0.00254309	0.0136313
U1338	B	36	H	4	120	326.605	359.642	13572.5	70.0625	0.0403498	0.372625	2.08862	1.46334	0.000842755	0.00778273
U1338	B	36	H	5	122	328.125	361.162	13627.2	73.4634	0.0358727	0.325473	4.62729	3.39936	0.00165993	0.0150605
U1338	C	37	H	1	122	327.125	362.192	13644.8	83.8658	0.0272466	0.347676	7.39561	6.20239	0.00201505	0.0257128
U1338	C	37	H	2	122	328.625	363.692	13664.8	86.6504	0.0277379	0.444229	7.89981	6.84522	0.00219124	0.0350932
U1338	C	37	H	3	122	330.125	365.192	13687.1	87.7855	0.0229818	0.355104	7.23981	6.3555	0.00166384	0.0257088
U1338	C	37	H	4	122	331.635	366.702	13710.9	90.4589	0.0267484	0.417579	6.80452	6.1553	0.0018201	0.0284142
U1338	B	37	H	2	122	333.125	367.106	13717.6	83.3667	0.0338755	0.362067	6.54377	5.45532	0.00221674	0.0236928
U1338	B	37	H	3	122	334.625	368.606	13746.8	83.1272	0.0424939	0.420826	4.28177	3.55931	0.00181949	0.0180188
U1338	B	37	H	4	122	336.125	370.106	13785.3	83.2207	0.0362558	0.372838	4.30451	3.58225	0.00156063	0.0160489
U1338	B	37	H	5	120	337.605	371.586	13827.7	85.3635	0.031622	0.449824	1.54094	1.3154	0.000487276	0.00693152
U1338	B	37	H	6	45	338.355	372.336	13877	87.4264	0.0393403	0.390966	1.20175	1.05065	0.000472772	0.00469843
U1338	C	38	H	2	122	338.125	373.714	13937.5	72.849	0.0302354	0.422807	3.97009	2.89217	0.00120037	0.0167858
U1338	C	38	H	3	122	339.625	375.214	13977	33.1075	0.054591	0.442134	3.34312	1.10682	0.00182504	0.0147811
U1338	C	38	H	4	122	341.125	376.714	14029.6	75.3764	0.0335412	0.416968	1.89505	1.42842	0.000635623	0.00790176
U1338	C	38	H	5	122	342.625	378.214	14102.4	83.5374	0.0255328	0.314878	3.83628	3.20473	0.00097951	0.0120796
U1338	B	38	H	2	120	342.605	378.488	14110.1	86.2353	0.0376466	0.319377	4.01552	3.4628	0.00151171	0.0128247
U1338	B	38	H	3	120	344.105	379.988	14146.1	83.4446	0.0434229	0.387133	5.14909	4.29664	0.00223589	0.0199338
U1338	B	38	H	4	120	345.605	381.488	14177.2	83.8684	0.038109	0.357241	4.1485	3.47928	0.00158095	0.0148202
U1338	C	39	H	1	122	346.125	382.227	14201.3	78.6546	0.0299447	0.415229	2.86638	2.25454	0.000858329	0.011902
U1338	B	38	H	5	120	347.105	382.988	14227.1	83.4648	0.0428801	0.342991	3.40245	2.83985	0.00145898	0.0116701
U1338	C	39	H	2	122	347.625	383.727	14248.7	86.7008	0.0340793	0.301849	3.68198	3.19231	0.0012548	0.011114
U1338	C	39	H	3	122	349.125	385.227	14317.1	77.1229	0.0298918	0.287059	2.07547	1.60066	0.000620395	0.00595782
U1338	C	39	H	4	122	350.625	386.727	14386.6	84.2705	0.0308401	0.343339	2.16036	1.82054	0.000666257	0.00741734
U1338	C	39	H	5	122	352.125	388.227	14479.6	83.9984	0.0406218	0.290377	2.78375	2.33831	0.00113081	0.00808338
U1338	C	39	H	6	122	353.625	389.727	14569.1	81.5919	0.0300788	0.387917	0.752201	0.613735	0.000226253	0.00291791
U1338	C	40	H	1	47	354.875	391.357	14709.1	79.1622	0.0271794	0.431752	1.15706	0.915955	0.000314482	0.00499564
U1338	C	40	H	2	47	356.375	392.857	14848.6	85.6833	0.0313682	0.387593	1.4823	1.27009	0.000464973	0.00574531
U1338	C	40	H	3	47	357.875	394.357	14918.7	82.3807	0.0377698	0.392468	2.612	2.15178	0.000986546	0.0102512
U1338	C	40	H	4	47	359.375	395.857	15018.8	89.7573	0.0290372	0.397342	2.36275	2.12074	0.000686076	0.0093882
U1338	C	40	H	5	47	360.875	397.357	15084.3	87.7622	0.0287728	0.402217	2.77112	2.432	0.00079733	0.0111459
U1338	C	40	H	7	47	363.475	399.957	15193	73.7844	0.028357	0.410667	2.37811	1.75467	0.000674359	0.0097661
U1338	C	41	H	1	47	364.375	401.767	15282.8	82.6078	0.0278305	0.370809	3.01586	2.49133	0.000839327	0.0111831
U1338	C	41	H	2	44	365.845	403.237	15341.9	79.8939	0.026862	0.276381	5.10205	4.07623	0.00137052	0.0141011
U1338	C	41	H	3	44	367.345	404.737	15368.7	75.2883	0.0299257	0.261194	3.70855	2.7921	0.00110981	0.0096865
U1338	C	41	H	4	44	368.85	406.242	15440.8	82.9755	0.026936	0.480839	2.59122	2.15008	0.000697973	0.0124596
U1338	C	41	H	5	44	370.345	407.737	15515.2	85.4223	0.0298862	0.344024	2.58096	2.20472	0.000771352	0.00887912
U1338	C	41	H	6	44	371.855	409.247	15577.4	77.8457	0.0282142	0.456533	2.31015	1.79835	0.00065179	0.0105466
U1338	C	41	H	7	45	373.375	410.767	15614.3	80.5683	0.0370542	0.339419	6.55352	5.28006	0.00242835	0.0222439
U1338	B	41	H	1	120	369.605	412.072	15642.4	75.2804	0.0301842	0.36407	3.3244	2.50262	0.00100344	0.0121031
U1338	B	41	H	3	120	372.605	415.072	15735.2	75.8542	0.0357764	0.488174	4.86491	3.69024	0.00174049	0.0237492
U1338	B	41	H	4	120	374.105	416.572	15779.6	69.9771	0.0331606	0.36743	2.65182	1.85567	0.000879361	0.0097436
U1338	B	41	H	6	45	376.355	418.822	15981	76.3834	0.0206168	0.323707	3.44882	2.63433	0.000711036	0.0111641
U1338	C	43	H	1	120	379.105	418.857	15982	78.0354	0.0333873	0.339218	3.42375	2.67174	0.0011431	0.011614
U1338	C	43	H	3	120	382.115	421.867	16117.7	72.8176	0.0431034	0.386117	1.38515	1.00863	0.000597047	0.00534829
U1338	B	42	H	2	45	379.855	423.095	16206.8	75.9572	0.0270508	0.329785	1.15784	0.879461	0.000313204	0.00381837
U1338	C	43	H	4	120	383.625	423.377	16233	70.3253	0.0257823	0.328191	1.27031	0.893349	0.000327516	0.00416905
U1338	B	42	H	3	45	381.355	424.595	16319.3	72.1181	0.0280134	0.477186	1.65117	1.19079	0.00046255	0.00787916
U1338	B	42	H	5	45	384.385	427.625	16426.1	76.3834	0.0206168	0.451161	2.91396	2.22578	0.000600764	0.0131466
U1338	C	44	H	2	120	390.115	430.526	16516.7	76.2249	0.0268915	0.403407	3.23889	2.46884	0.000870986	0.0130659
U1338	C	44	H	3	120	391.635	432.046	16565.6	76.8465	0.0270673	0.355203	3.39942	2.61234	0.00092013	0.0120748
U1338	C	44	H	4	45	392.405	432.816	16589.9	81.6303	0.0253922	0.42743	3.25894	2.66028	0.000827518	0.0139297
U1338	C	44	H	5	45	393.925	434.336	16660.7	80.1224	0.0254042	0.324465	3.55547	2.84873	0.000903238	0.0115363
U1338	C	44	H	6	45	395.145	435.556	16698.3	76.9138	0.0381456	0.42179	1.73377	1.33351	0.000661356	0.00731285
U1338	C	45	H	1	120	398.105	438.216	16883.9	73.0274	0.0237105	0.337464	1.73377	1.26612	0.000411084	0.00585083
U1338	C	45	H	2	45	398.865	438.976	16936.9	80.2301	0.0192405	0.399561	1.73377	1.391	0.000333585	0.00692745
U1338	C	45	H	4	45	401.895	442.006	17148.3	73.0233	0.017227	0.591111	1.73377	1.26605	0.000298676	0.0102485
U1338	C	45	H	5	45	403.415	443.526	17254.3	80.1469	0.0156376	0.584117	1.73377	1.38956	0.00027112	0.0101272
U1338	C	46	H	1	45	404.455	444.621	17330.7	78.1675	0.0173752	0.404764	1.73377	1.35524	0.000301245	0.00701765
U1338	C	46	H	1	120	405.205	445.371	17383	73.6	0.0184113	0.532395	1.73377	1.27605	0.000319209	0.00923048
U1338	C	46	H	2	45	405.955	446.121	17435.4	71.2009	0.0240608	0.419784	1.73377	1.23446	0.000417158	0.00727806
U1338	C	46	H	2	120	406.705	446.871	17487.7	74.3306	0.0172175	0.511665	1.73377	1.28872	0.000298512	0.00887108
U1338	C	46	H	3	45	407.455	447.621	17540	77.8674	0.0190901	0.424607	1.73377	1.35004	0.000330978	0.00736168
U1338	C	46	H	3	120	408.205	448.371	17592.3	73.0157	0.0206563	0.404535	1.73377	1.26592	0.000358132	0.00701368
U1338	C	46	H	4	45	408.965	449.131	17645.3	48.8961	0.03119	0.384402	1.73377	0.847744	0.000540762	0.00666462
U1338	C	46	H	5	45	409.985	450.151	17716.5	70.7709	0.0194306	0.889398	1.73377	1.227	0.00033688	0.0154201
