# Supplementary material for: Variations in the Biological Pump through the Miocene: Evidence from organic carbon burial in Pacific Ocean sediments
Source: Copernicus journal article supplement (doi:10.5194/cp-2024-34), 2024-05-27
Supplement: Supplementary file 9 [file SuppTable_S14_U1338_ age_model_XRF_MAR.xlsx]

## Sheet: SuppTable_S14_age_model_XRF_MAR
Age (Ma)	Depth (m CCSF)	Bulk MAR (g/cm2/kyr)	CaCO3 MAR (g/cm2/kyr)	Bio-SiO2 MAR (g/cm2/kyr)	BaSO4 MAR (g/cm2/kyr)	Clay MAR (g/cm2/kyr)
0	0	1.32789	0.976467	0.0787913	0.00420738
0.01	0.249779	1.07651	0.779453	0.069507	0.00424092	0.0468386
0.02	0.40726	0.917816	0.704326	0.0361348	0.00322217	0.0347401
0.03	0.592532	1.02962	0.797286	0.0423359	0.00307697	0.0345806
0.04	0.777805	1.29351	0.999978	0.059541	0.00352261	0.0324291
0.05	1.03137	1.45442	1.08255	0.0924568	0.00462512	0.0406945
0.06	1.30613	0.85805	0.566864	0.0617693	0.00829091	0.0564145
0.07	1.46733	0.466706	0.289998	0.0315652	0.00447235	0.0480947
0.08	1.55284	0.298011	0.175243	0.0171344	0.00342578	0.0468529
0.09	1.63179	0.278913	0.172442	0.00501628	0.00518019	0.0393095
0.1	1.7089	0.293034	0.176485	0.0122727	0.00433906	0.0413547
0.11	1.78724	0.304484	0.172042	0.0319759	0.00316116	0.035837
0.12	1.86126	0.322909	0.18755	0.0283389	0.00361648	0.0379503
0.13	1.93293	0.440975	0.280562	0.0296676	0.00396663	0.040547
0.14	2.04002	0.667499	0.497656	0.0196095	0.00485918	0.0307065
0.15	2.19927	0.866946	0.653411	0.0361559	0.00402708	0.0421463
0.16	2.37605	0.696839	0.51926	0.029241	0.00372388	0.0394505
0.17	2.51841	0.700524	0.500133	0.0384092	0.0038816	0.0462481
0.18	2.69508	0.480647	0.303937	0.0138549	0.00674115	0.061164
0.19	2.84684	0.389327	0.209114	0.000255	0.0116553	0.115935
0.2	2.97653	0.473113	0.270999	0.0183091	0.00751765	0.093611
0.21	3.14033	0.538478	0.357829	0.03984	0.00371499	0.0324514
0.22	3.25494	0.441457	0.3056	0.0328703	0.00230761	0.0234198
0.23	3.34363	0.443836	0.315481	0.0306787	0.00196189	0.0244702
0.24	3.45953	0.588751	0.443075	0.029577	0.00191981	0.0217047
0.25	3.57303	0.624629	0.461908	0.0344976	0.00227181	0.020449
0.26	3.67876	0.522516	0.323893	0.0405195	0.00412677	0.063563
0.27	3.77878	0.325818	0.171482	0.0301728	0.00379765	0.0594233
0.28	3.86074	0.258693	0.166277	0.0166291	0.00223986	0.0254097
0.29	3.94521	0.327257	0.226437	0.0179528	0.0021978	0.0275322
0.3	4.02969	0.364796	0.255887	0.0219719	0.00214602	0.0249121
0.31	4.11364	0.412498	0.285139	0.0264551	0.00257787	0.0273613
0.32	4.21218	0.484194	0.339285	0.0268857	0.00297385	0.0375322
0.33	4.322	0.623083	0.477067	0.0226332	0.00181818	0.0255482
0.34	4.43498	0.767908	0.598781	0.0224201	0.00225633	0.028343
0.35	4.55573	0.803408	0.607443	0.0145956	0.0043962	0.0471432
0.36	4.67177	0.769265	0.571417	0.0182943	0.00501063	0.0513621
0.37	4.78579	0.708445	0.517433	0.0224253	0.00419959	0.0517169
0.38	4.89441	0.560406	0.394172	0.0129163	0.00500681	0.054617
0.39	5.0032	0.534547	0.350478	0.0166709	0.00613489	0.064201
0.4	5.11396	0.556566	0.368556	0.0218667	0.00511973	0.0781298
0.41	5.22662	0.519985	0.401025	0.0203546	0.00134078	0.0179559
0.42	5.33982	0.432566	0.343465	0.0135917	0.000816067	0.0101834
0.43	5.42922	0.451524	0.355348	0.0163663	0.000835746	0.0117467
0.44	5.55345	0.814565	0.652804	0.0212623	0.00155129	0.0221521
0.45	5.68286	0.845959	0.672766	0.0229665	0.0017958	0.0230626
0.46	5.77584	0.898211	0.706269	0.0261004	0.0029101	0.0222592
0.47	5.9131	1.24982	0.947606	0.0449024	0.00504319	0.0566099
0.48	6.10565	1.56664	1.00825	0.088605	0.0140147	0.199529
0.49	6.31297	1.36135	0.985602	0.0699446	0.00702224	0.0650059
0.5	6.51766	0.713111	0.55432	0.0274892	0.00172798	0.0196738
0.51	6.62446	0.417035	0.328664	0.0119089	0.00113779	0.0106969
0.52	6.70828	0.483762	0.375748	0.0144555	0.00146143	0.0149776
0.53	6.79163	0.526032	0.40824	0.019384	0.00122615	0.0163474
0.54	6.87766	0.572899	0.440642	0.0209998	0.00161335	0.0204472
0.55	6.96423	0.525975	0.385096	0.0266478	0.00225096	0.0280025
0.56	7.03232	0.445542	0.32434	0.0200684	0.00237814	0.0225745
0.57	7.09881	0.420219	0.293187	0.0192049	0.00331961	0.0308794
0.58	7.16402	0.414415	0.288591	0.0187704	0.00363256	0.0306392
0.59	7.23032	0.435589	0.31455	0.0141603	0.00400378	0.0268371
0.6	7.29829	0.443463	0.320742	0.02465	0.00231096	0.0226489
0.61	7.36478	0.384333	0.278616	0.0202373	0.00204295	0.0212059
0.62	7.43127	0.416533	0.295397	0.0267018	0.0020822	0.0230541
0.63	7.5369	0.741939	0.535034	0.0424258	0.0036926	0.0397992
0.64	7.72174	1.09425	0.844256	0.0433326	0.00319634	0.0331443
0.65	7.91106	1.22657	0.968061	0.0409425	0.00211744	0.0281239
0.66	8.0735	1.05749	0.841442	0.0337838	0.00172666	0.0195178
0.67	8.20945	0.884184	0.69534	0.0322051	0.00167769	0.0208479
0.68	8.3454	0.743867	0.566952	0.0337943	0.00205	0.0263427
0.69	8.48764	0.827032	0.600829	0.0452721	0.003973	0.0408969
0.7	8.63099	0.848376	0.573024	0.0555606	0.00663966	0.0809273
0.71	8.78037	0.926806	0.689206	0.0450362	0.00425338	0.0253669
0.72	8.93159	1.03514	0.767903	0.0658921	0.00262726	0.0261344
0.73	9.07915	1.04367	0.791841	0.0511707	0.00256535	0.0349096
0.74	9.2285	1.00808	0.7801	0.0478933	0.00188518	0.0232481
0.75	9.38386	1.15756	0.898586	0.0511419	0.00197833	0.0252397
0.76	9.603	1.08416	0.809591	0.0566623	0.00305035	0.0446335
0.77	9.79507	1.2054	0.81751	0.0874406	0.00690475	0.0817694
0.78	9.94295	0.984801	0.723905	0.0507069	0.00387444	0.0374824
0.79	10.0859	0.948543	0.72865	0.0369232	0.0024475	0.0302325
0.8	10.2387	0.885412	0.66754	0.0370762	0.00262309	0.0334613
0.81	10.3858	0.646634	0.451452	0.0442441	0.0026016	0.0303909
0.82	10.517	0.448158	0.276884	0.0450247	0.00277316	0.0350031
0.83	10.6217	0.340487	0.186873	0.0393159	0.00291762	0.0406832
0.84	10.702	0.378342	0.187933	0.048904	0.0037444	0.0520086
0.85	10.7824	0.560279	0.314452	0.0658643	0.00432778	0.0640441
0.86	10.8628	0.613616	0.426905	0.0467354	0.0021016	0.0330325
0.87	10.9536	0.775861	0.583443	0.0393236	0.00191043	0.0258923
0.88	11.0907	0.959912	0.720664	0.0480934	0.00236115	0.0365275
0.89	11.2283	0.959227	0.73377	0.044333	0.00225602	0.0305851
0.9	11.3658	0.870036	0.6614	0.0467683	0.00175491	0.0243033
0.91	11.5034	0.884883	0.65014	0.0634458	0.00191499	0.026899
0.92	11.6672	0.999435	0.723919	0.0714073	0.00236736	0.0400853
0.93	11.8461	0.803956	0.543303	0.0669106	0.00368679	0.0497284
0.94	12.0165	0.570379	0.286619	0.0755532	0.00545623	0.0866892
0.95	12.1415	0.559885	0.311824	0.0738721	0.00409472	0.0565069
0.96	12.2658	0.554811	0.336647	0.0652968	0.00288322	0.0404238
0.97	12.387	0.458139	0.279087	0.050379	0.00272586	0.0353496
0.98	12.4754	0.420913	0.266236	0.0456833	0.00214786	0.0236666
0.99	12.5632	0.558346	0.374908	0.0501086	0.00239195	0.0344396
1	12.6765	0.614849	0.426574	0.0487616	0.00227659	0.0300716
1.01	12.8101	0.619648	0.414162	0.0540252	0.00302979	0.0367628
1.02	12.9382	0.750987	0.51561	0.065069	0.00306758	0.0435385
1.03	13.0664	0.847732	0.623733	0.0531764	0.00233997	0.0271821
1.04	13.2038	0.923433	0.677989	0.0583392	0.00282197	0.0367433
1.05	13.3603	0.850254	0.573985	0.0623189	0.0053509	0.0627076
1.06	13.5155	0.754349	0.453273	0.0646758	0.00674852	0.0992266
1.07	13.663	0.625025	0.41463	0.0527107	0.00370589	0.0428496
1.08	13.8142	0.715511	0.516299	0.0496182	0.00231166	0.0279285
1.09	13.9659	0.913479	0.657413	0.0567283	0.00309218	0.0431635
1.1	14.1175	0.860866	0.638449	0.0524214	0.00230245	0.0262444
1.11	14.269	0.932444	0.6903	0.0560828	0.00243272	0.0241092
1.12	14.422	1.08783	0.751522	0.086547	0.00365793	0.0549628
1.13	14.6408	1.00961	0.643326	0.0833395	0.00615047	0.0929257
1.14	14.8084	0.490425	0.252655	0.0468282	0.00532441	0.074898
1.15	14.8676	0.23914	0.122047	0.0276948	0.00198499	0.0338813
1.16	14.9247	0.216503	0.124141	0.0185051	0.00186297	0.027364
1.17	14.9874	0.309575	0.187212	0.0238383	0.00243657	0.0366252
1.18	15.1199	0.653404	0.461261	0.0432209	0.00275687	0.034841
1.19	15.3532	1.0924	0.825253	0.0497211	0.00248871	0.0367847
1.2	15.5452	1.09486	0.77933	0.0709448	0.00350961	0.042611
1.21	15.7151	0.858241	0.494226	0.0862313	0.0066361	0.127656
1.22	15.8204	0.472462	0.235158	0.0553963	0.00477978	0.0891884
1.23	15.8988	0.346203	0.212962	0.0344392	0.00230136	0.0298601
1.24	15.989	0.335903	0.222211	0.0266585	0.00210157	0.0294153
1.25	16.0997	0.408017	0.280453	0.0300319	0.00162764	0.0245232
1.26	16.2388	0.643128	0.437002	0.0544226	0.00255202	0.0350464
1.27	16.3947	0.785952	0.550368	0.057676	0.00296323	0.043651
1.28	16.5507	0.726285	0.516864	0.050142	0.00288634	0.0367208
1.29	16.6978	0.677526	0.503473	0.0409549	0.00152282	0.0213431
1.3	16.8148	0.596495	0.430915	0.0429033	0.00165333	0.0238885
1.31	16.9313	0.671297	0.464538	0.0585036	0.00240808	0.0329487
1.32	17.0488	1.16684	0.751124	0.129605	0.00546363	0.0796961
1.33	17.306	1.25284	0.867359	0.114527	0.00405685	0.0526547
1.34	17.5457	1.19674	0.813343	0.11413	0.00401668	0.051455
1.35	17.7854	1.03649	0.549717	0.158769	0.00696014	0.0899374
1.36	17.9411	0.673314	0.39365	0.0762396	0.0047475	0.0602228
1.37	18.042	0.421741	0.276281	0.0382343	0.00219916	0.0265337
1.38	18.1459	0.427763	0.268773	0.0412594	0.00259461	0.0342983
1.39	18.283	0.492147	0.267918	0.053272	0.00433773	0.0808182
1.4	18.4406	0.706039	0.507886	0.0428795	0.00264089	0.0263286
1.41	18.6069	0.55443	0.391273	0.036655	0.00208261	0.0280288
1.42	18.7381	0.485163	0.280795	0.0413223	0.00432312	0.0684333
1.43	18.8718	0.776778	0.488108	0.0706372	0.00494544	0.0609098
1.44	19.0018	0.690546	0.417845	0.0645093	0.00480159	0.072354
1.45	19.1092	0.555033	0.310933	0.0582527	0.00416288	0.0557787
1.46	19.2142	0.401566	0.160683	0.057159	0.00474103	0.0930717
1.47	19.3075	0.341636	0.156487	0.0474819	0.00320715	0.0584538
1.48	19.4002	0.429064	0.245657	0.0451565	0.00330406	0.042536
1.49	19.5174	0.487993	0.311914	0.0429537	0.00267902	0.0337954
1.5	19.6392	0.423288	0.264702	0.0451783	0.00215645	0.0309398
1.51	19.7654	0.403452	0.261482	0.0386245	0.00194235	0.0222045
1.52	19.8927	0.558755	0.404201	0.0351538	0.00159607	0.022082
1.53	20.0448	0.704343	0.485165	0.0569146	0.0021716	0.0316739
1.54	20.207	0.724629	0.4585	0.0785364	0.00322717	0.046551
1.55	20.3759	0.912003	0.563669	0.0899103	0.00583197	0.0719063
1.56	20.5453	0.925405	0.62313	0.0676234	0.00463158	0.0700107
1.57	20.7366	0.755203	0.504009	0.0618226	0.00356413	0.0531135
1.58	20.8977	0.608237	0.378425	0.0545836	0.00404527	0.0588681
1.59	21.0187	0.485314	0.269122	0.0466003	0.00457463	0.0748431
1.6	21.1255	0.59577	0.369632	0.0449777	0.00435904	0.0597228
1.61	21.2324	0.508023	0.304803	0.0381545	0.00446455	0.0623845
1.62	21.3393	0.471548	0.282388	0.0343664	0.00446677	0.0608197
1.63	21.4505	0.517203	0.353048	0.0328145	0.00267871	0.0432692
1.64	21.612	0.610818	0.442341	0.041241	0.00156522	0.0238065
1.65	21.7606	0.560397	0.394284	0.046022	0.0017309	0.021483
1.66	21.8912	0.664633	0.468742	0.0485791	0.00243302	0.030313
1.67	22.0098	0.683144	0.508262	0.0335845	0.00214755	0.0279218
1.68	22.1331	0.730356	0.541113	0.037272	0.00205889	0.0335649
1.69	22.2607	0.699381	0.502072	0.0407257	0.002557	0.0357063
1.7	22.3885	0.764848	0.488246	0.0581726	0.00491588	0.0748
1.71	22.5134	0.795966	0.483423	0.062793	0.00694394	0.0886352
1.72	22.6352	0.736726	0.455976	0.0589849	0.00571028	0.0901892
1.73	22.7576	0.511113	0.300723	0.0425816	0.00480547	0.0726545
1.74	22.8817	0.442236	0.274817	0.033152	0.00341058	0.0493466
1.75	23.0049	0.439351	0.253468	0.0342442	0.00453714	0.0706049
1.76	23.1268	0.461602	0.30103	0.0333304	0.00299425	0.0423444
1.77	23.2621	0.525889	0.377126	0.0317163	0.00192177	0.0228446
1.78	23.4198	0.632289	0.421039	0.0452721	0.00396904	0.0505039
1.79	23.5361	0.536733	0.299503	0.0483858	0.0051735	0.0679378
1.8	23.6317	0.45366	0.237705	0.0406112	0.0056062	0.0778215
1.81	23.7241	0.382424	0.20006	0.0415897	0.00381935	0.0599073
1.82	23.8165	0.352048	0.196993	0.0313558	0.00332986	0.0443882
1.83	23.9067	0.285599	0.160933	0.0234634	0.00297169	0.0409015
1.84	23.989	0.303746	0.178973	0.0254673	0.00271333	0.0353824
1.85	24.0974	0.355877	0.194217	0.0357107	0.00379981	0.0500221
1.86	24.2126	0.388745	0.211215	0.035286	0.00438504	0.0595044
1.87	24.328	0.430994	0.258171	0.0395381	0.00319867	0.0456467
1.88	24.4553	0.471724	0.307705	0.0405032	0.00232706	0.0284647
1.89	24.5898	0.602712	0.392159	0.0508986	0.00286379	0.0419356
1.9	24.7243	0.627924	0.364432	0.0628387	0.0044878	0.0611693
1.91	24.8601	0.804251	0.314164	0.124579	0.00992476	0.154655
1.92	25.0814	0.48333	0.207879	0.0691606	0.00517302	0.081657
1.93	25.2235	0.398188	0.210012	0.0471205	0.00354252	0.0530711
1.94	25.3962	0.455808	0.260632	0.0484038	0.00379231	0.0511656
1.95	25.5197	0.554776	0.227186	0.0830076	0.00644088	0.0846209
1.96	25.6749	0.618255	0.218074	0.118937	0.00683429	0.122649
1.97	25.839	0.465126	0.23553	0.0706468	0.00358414	0.0531883
1.98	26.0029	0.560945	0.338145	0.0693525	0.00333676	0.0422976
1.99	26.2115	0.825412	0.53229	0.0754432	0.0045403	0.0537707
2	26.4275	0.883885	0.5388	0.0746774	0.00630316	0.0886813
2.01	26.6241	0.940678	0.574884	0.0852731	0.00635569	0.0677457
2.02	26.859	0.93823	0.604899	0.0844059	0.00525134	0.0668936
2.03	27.094	1.15126	0.746377	0.112524	0.0055378	0.0590201
2.04	27.3306	1.05263	0.66608	0.119034	0.00447088	0.0549213
2.05	27.5175	0.911136	0.557893	0.107493	0.00468619	0.0615958
2.06	27.7018	0.898503	0.505046	0.109658	0.00631832	0.0924245
2.07	27.886	0.754732	0.438596	0.0689922	0.00650177	0.0833407
2.08	28.0644	0.695123	0.392765	0.0631177	0.00684042	0.0713217
2.09	28.2434	0.69933	0.437945	0.0564382	0.00463838	0.0420974
2.1	28.4165	0.576092	0.39561	0.0439508	0.00243178	0.0256393
2.11	28.5186	0.563498	0.372137	0.0473029	0.00278298	0.0329808
2.12	28.6206	0.61521	0.40738	0.0509348	0.00312796	0.0422067
2.13	28.7225	0.554983	0.384048	0.0356292	0.00293313	0.0324263
2.14	28.8287	0.507238	0.358105	0.0304146	0.00262503	0.0258471
2.15	28.9314	0.482884	0.337921	0.0287992	0.00262019	0.0298908
2.16	29.015	0.383665	0.261584	0.0265772	0.00221453	0.0234914
2.17	29.0855	0.394894	0.276041	0.025356	0.00215208	0.0210305
2.18	29.156	0.383494	0.270351	0.0200865	0.00193353	0.0262875
2.19	29.2265	0.354792	0.234251	0.0233566	0.00243082	0.0282237
2.2	29.2974	0.510422	0.324714	0.038485	0.0038513	0.0460905
2.21	29.432	0.950092	0.612722	0.0715039	0.00669828	0.0653905
2.22	29.7029	1.21931	0.73369	0.0978568	0.0100641	0.128234
2.23	29.9736	0.994407	0.588907	0.0931278	0.0072661	0.0807261
2.24	30.2173	0.820005	0.474194	0.082126	0.00645866	0.0922182
2.25	30.3674	0.641077	0.402846	0.0573939	0.00425937	0.0552695
2.26	30.5122	0.418357	0.263887	0.0401658	0.00256199	0.0293731
2.27	30.5911	0.309648	0.187725	0.0312913	0.00209716	0.0248688
2.28	30.6662	0.343628	0.175653	0.041534	0.00345432	0.0447097
2.29	30.7488	0.364824	0.18199	0.0472758	0.0033325	0.0464955
2.3	30.8342	0.378176	0.219043	0.0399857	0.0029851	0.0358792
2.31	30.9195	0.313302	0.179682	0.0345305	0.00243243	0.0292077
2.32	31.005	0.356427	0.200324	0.0439888	0.00267852	0.0319287
2.33	31.1343	0.398377	0.217126	0.0524574	0.00299252	0.0421764
2.34	31.2076	0.242427	0.148014	0.025451	0.00146278	0.0189194
2.35	31.2578	0.244542	0.152325	0.0265821	0.00133781	0.0157013
2.36	31.3369	0.310948	0.182589	0.0443317	0.00153153	0.0189286
2.37	31.4262	0.345862	0.225999	0.0329533	0.00154059	0.0180345
2.38	31.5296	0.380048	0.265922	0.0285843	0.00152883	0.0182097
2.39	31.6329	0.411596	0.296065	0.0284979	0.00138068	0.0174629
2.4	31.7362	0.553081	0.413393	0.0318189	0.00133243	0.0178604
2.41	31.8611	0.677393	0.512494	0.0340848	0.00167845	0.0214208
2.42	31.9951	0.933153	0.709996	0.043903	0.00208766	0.0244519
2.43	32.1908	1.28679	0.952584	0.0704552	0.00372449	0.0495305
2.44	32.3872	1.08595	0.729642	0.0901704	0.00524354	0.0649706
2.45	32.4981	0.680394	0.430473	0.0669718	0.00401779	0.049336
2.46	32.5919	0.569737	0.387165	0.0488812	0.00261746	0.0311709
2.47	32.6856	0.523497	0.373654	0.0385639	0.00172551	0.0220843
2.48	32.7868	0.533005	0.389978	0.0301133	0.0016721	0.0231013
2.49	32.9034	0.545981	0.374232	0.0432926	0.00223404	0.0229985
2.5	33.0283	0.708262	0.453311	0.0700719	0.00367544	0.048413
2.51	33.1801	0.759388	0.511779	0.0687043	0.003053	0.0312268
2.52	33.3356	0.826787	0.561018	0.0739076	0.00321164	0.0379186
2.53	33.5455	1.12074	0.764399	0.0822282	0.00485367	0.0486838
2.54	33.7988	1.05222	0.45994	0.14837	0.0108579	0.144156
2.55	33.9638	0.556674	0.239529	0.0785243	0.00592938	0.0677555
2.56	34.1072	0.414819	0.218723	0.0373874	0.00367184	0.0468566
2.57	34.2284	0.362108	0.21445	0.0310913	0.0026942	0.0337376
2.58	34.3494	0.41835	0.242989	0.0374518	0.00329182	0.0473264
2.59	34.4729	0.468153	0.283274	0.0428796	0.00333884	0.0511685
2.6	34.6048	0.480703	0.314871	0.0395744	0.0027376	0.03363
2.61	34.7278	0.448933	0.286131	0.0365789	0.00294883	0.0406241
2.62	34.8451	0.541228	0.350971	0.0420299	0.0032691	0.0408083
2.63	34.9623	0.479819	0.304913	0.0355221	0.00307757	0.042055
2.64	35.0743	0.476539	0.307014	0.0361897	0.00282049	0.0405248
2.65	35.1949	0.647765	0.426425	0.0462791	0.00343893	0.0380449
2.66	35.3629	0.676453	0.375339	0.0706962	0.00554354	0.0986908
2.67	35.507	0.669954	0.412399	0.0692279	0.00403802	0.0468999
2.68	35.65	0.560566	0.372395	0.0501774	0.00244602	0.0292707
2.69	35.793	0.547489	0.385236	0.0387073	0.00204388	0.022944
2.7	35.9643	0.93805	0.644138	0.0729256	0.00432368	0.0475369
2.71	36.187	1.17045	0.839057	0.0736244	0.00423178	0.0444443
2.72	36.4095	1.09272	0.703303	0.110979	0.00569879	0.0629901
2.73	36.5719	0.789763	0.48031	0.0894478	0.00474163	0.051727
2.74	36.7043	0.579456	0.367022	0.0536261	0.00317109	0.0487759
2.75	36.8366	0.531532	0.365828	0.0361405	0.00243281	0.027563
2.76	36.9689	0.571082	0.38355	0.0421891	0.00290293	0.0352082
2.77	37.1233	0.799877	0.508259	0.0652165	0.00486892	0.0792123
2.78	37.2732	0.795691	0.543488	0.0562014	0.00385645	0.0476619
2.79	37.421	0.639205	0.458784	0.0389598	0.00222101	0.0253616
2.8	37.5514	0.69241	0.493881	0.0449035	0.00281658	0.0348063
2.81	37.6905	0.922675	0.613551	0.0740873	0.00528386	0.064573
2.82	37.8595	0.964078	0.695085	0.057703	0.00350588	0.0398373
2.83	38.0092	0.66177	0.484647	0.0379215	0.0023378	0.0276345
2.84	38.1306	0.69707	0.497575	0.043724	0.00351322	0.029007
2.85	38.252	0.79452	0.530765	0.0706656	0.00479571	0.0390802
2.86	38.3734	0.81587	0.533722	0.078563	0.0048482	0.0448533
2.87	38.4949	0.759659	0.482361	0.0750972	0.00501961	0.0449719
2.88	38.6169	0.768646	0.468366	0.0823202	0.00680052	0.064314
2.89	38.7725	0.882665	0.580288	0.0814319	0.00622114	0.0479198
2.9	38.9381	0.8182	0.529381	0.0748551	0.00530988	0.0417645
2.91	39.1036	0.840033	0.57206	0.0667392	0.0049251	0.0492213
2.92	39.2752	0.886709	0.582442	0.0774646	0.0066022	0.0432009
2.93	39.448	0.850082	0.432088	0.106857	0.010935	0.135599
2.94	39.6034	0.877452	0.526539	0.0848598	0.00831272	0.0885269
2.95	39.7585	0.74995	0.443798	0.0797746	0.00709828	0.0698097
2.96	39.9396	0.682445	0.406418	0.0721962	0.0064191	0.0557049
2.97	40.1133	0.707927	0.384477	0.0894435	0.007831	0.0722929
2.98	40.2489	0.624211	0.374806	0.0677567	0.00594486	0.0464951
2.99	40.3834	0.613627	0.35423	0.0618548	0.00698379	0.0628483
3	40.5188	0.566555	0.364224	0.0513708	0.00412769	0.0383453
3.01	40.668	0.585281	0.335739	0.0607375	0.00738126	0.0550777
3.02	40.8004	0.559236	0.24047	0.0751065	0.00961025	0.105923
3.03	40.9318	0.521013	0.250277	0.0657495	0.00716861	0.0657105
3.04	41.0636	0.64678	0.287794	0.0911037	0.0096488	0.116294
3.05	41.1958	0.637136	0.2023	0.124911	0.0105668	0.135391
3.06	41.3543	0.52348	0.20733	0.090812	0.00707502	0.076737
3.07	41.5253	0.657866	0.196379	0.121694	0.0114829	0.160606
3.08	41.7148	0.445153	0.198199	0.0631896	0.00609781	0.0647609
3.09	41.831	0.354788	0.145126	0.0560847	0.00499077	0.0588722
3.1	41.9424	0.342477	0.178116	0.0464265	0.00359534	0.0331358
3.11	42.0625	0.337812	0.16717	0.046052	0.00356603	0.0496546
3.12	42.1846	0.387893	0.213817	0.0511295	0.00358172	0.0409096
3.13	42.3214	0.484549	0.294583	0.0524089	0.00407806	0.0347928
3.14	42.4859	0.612063	0.243628	0.107217	0.00790457	0.117658
3.15	42.6716	0.714977	0.271973	0.130925	0.0098703	0.123813
3.16	42.8574	0.672846	0.265179	0.124014	0.00869457	0.0688652
3.17	43.0432	0.776323	0.298224	0.136665	0.0111923	0.129628
3.18	43.2145	0.56376	0.207876	0.10525	0.00784308	0.087079
3.19	43.3389	0.384784	0.164111	0.0710865	0.00443277	0.0453572
3.2	43.4634	0.371226	0.167205	0.0678271	0.0038101	0.047481
3.21	43.59	0.45063	0.237767	0.0710653	0.00373634	0.0277759
3.22	43.7401	0.507056	0.263777	0.0775769	0.00444016	0.0493983
3.23	43.8887	0.475183	0.23579	0.079784	0.00429088	0.0498681
3.24	44.0354	0.475885	0.276593	0.0531106	0.00360227	0.0422213
3.25	44.1587	0.438161	0.245612	0.0492912	0.00332489	0.0451674
3.26	44.2734	0.477065	0.283276	0.0524476	0.00305305	0.0331203
3.27	44.3881	0.505628	0.317908	0.0482284	0.00284016	0.0326112
3.28	44.5302	0.685562	0.450166	0.0611149	0.00360413	0.0357885
3.29	44.7434	0.8761	0.50259	0.105673	0.00667734	0.0806957
3.3	44.9371	0.718679	0.326384	0.0931176	0.00857309	0.111681
3.31	45.1085	0.68444	0.296343	0.0876171	0.00834717	0.126407
3.32	45.2321	0.498505	0.29059	0.0489279	0.0037866	0.0524709
3.33	45.3376	0.474244	0.279092	0.0480099	0.00354704	0.0461681
3.34	45.4429	0.390202	0.240273	0.038009	0.00249289	0.0296004
3.35	45.5482	0.520136	0.29787	0.0581295	0.00371458	0.0482024
3.36	45.7256	0.3597	0.211224	0.0371247	0.00274709	0.0359158
3.37	45.813	0.348536	0.232123	0.0259391	0.00202193	0.02484
3.38	45.9483	0.568461	0.361199	0.0478061	0.0039126	0.0538072
3.39	46.1096	0.686641	0.458021	0.0566547	0.00372818	0.0445182
3.4	46.2763	0.544668	0.389433	0.0367938	0.00201863	0.0253024
3.41	46.4152	0.464636	0.322684	0.036055	0.00191758	0.0238809
3.42	46.5541	0.645184	0.447947	0.0485801	0.00278175	0.0304811
3.43	46.693	0.671369	0.396655	0.0674714	0.00481672	0.0715386
3.44	46.8302	0.608764	0.371054	0.0604978	0.00419222	0.0513139
3.45	46.9653	0.713677	0.457742	0.0670901	0.00387713	0.0524991
3.46	47.1003	0.822821	0.520388	0.0845007	0.00458705	0.0524667
3.47	47.2359	0.810116	0.484008	0.0903486	0.00559951	0.0641041
3.48	47.3864	0.721439	0.441402	0.0849653	0.00398215	0.0462577
3.49	47.5016	0.461646	0.304012	0.0488189	0.00185073	0.0226534
3.5	47.5907	0.352205	0.229283	0.0390069	0.00146628	0.0167375
3.51	47.6798	0.472538	0.312357	0.0462658	0.00202683	0.0270317
3.52	47.7866	0.589741	0.389836	0.0556975	0.00268413	0.0330954
3.53	47.914	0.656296	0.428521	0.0656183	0.00284855	0.0385502
3.54	48.0413	0.615632	0.385024	0.0687164	0.00277703	0.0383279
3.55	48.1659	0.434544	0.266593	0.0521929	0.00223761	0.0301783
3.56	48.2534	0.375585	0.235229	0.0461749	0.00162058	0.0214128
3.57	48.3397	0.467259	0.269205	0.0690362	0.00233055	0.0297402
3.58	48.4259	0.463294	0.2275	0.0843029	0.00311929	0.0488988
3.59	48.5211	0.641913	0.28781	0.126303	0.00497596	0.0857164
3.6	48.6709	0.748838	0.321051	0.157813	0.0056472	0.0830905
3.61	48.8206	0.751945	0.321049	0.148172	0.00595791	0.0989612
3.62	48.9704	0.999056	0.450594	0.178232	0.00766905	0.0983533
3.63	49.1987	0.963005	0.477392	0.161419	0.00650519	0.0864548
3.64	49.3721	0.845711	0.48802	0.112646	0.00432998	0.0595033
3.65	49.5456	0.783682	0.374679	0.124214	0.00642048	0.0998513
3.66	49.719	0.630491	0.285038	0.111693	0.00550243	0.07126
3.67	49.8925	0.600806	0.241894	0.105958	0.00658912	0.0928644
3.68	50.0659	0.595323	0.232045	0.10158	0.00691113	0.100011
3.69	50.2308	0.571598	0.337221	0.0583168	0.00381122	0.0504669
3.7	50.3827	0.547116	0.289822	0.0662907	0.0048406	0.0677437
3.71	50.5346	0.611052	0.228291	0.105572	0.0074855	0.115156
3.72	50.6866	0.635331	0.291244	0.09665	0.00622751	0.096031
3.73	50.8385	0.55877	0.366132	0.0473088	0.00286024	0.0414621
3.74	50.9904	0.505377	0.342228	0.0393282	0.00233825	0.0291083
3.75	51.1424	0.411139	0.231884	0.0420185	0.00318661	0.052848
3.76	51.2943	0.41836	0.235547	0.0430016	0.0032541	0.0417531
3.77	51.4462	0.467078	0.266773	0.0471982	0.0029725	0.0360542
3.78	51.5982	0.583976	0.35019	0.0590595	0.00346214	0.0500158
3.79	51.7501	0.543237	0.286316	0.0624353	0.00446364	0.0808363
3.8	51.9021	0.437808	0.220327	0.0578344	0.00374507	0.0559954
3.81	52.054	0.64963	0.331589	0.0892374	0.00518633	0.0783123
3.82	52.2059	0.780679	0.382276	0.110119	0.0064844	0.117998
3.83	52.3579	0.833655	0.475003	0.0946148	0.00641075	0.0843625
3.84	52.5098	0.732395	0.419909	0.0841774	0.00546137	0.0865815
3.85	52.6617	0.590063	0.27733	0.0869235	0.00570692	0.0872814
3.86	52.8137	0.669261	0.237336	0.141664	0.00711812	0.110747
3.87	52.9656	0.707506	0.301304	0.137014	0.0063585	0.0703671
3.88	53.1175	0.642658	0.239667	0.132025	0.00634902	0.0853218
3.89	53.2695	0.55403	0.225929	0.116204	0.00527114	0.0686002
3.9	53.4214	0.548083	0.138811	0.161127	0.00550766	0.0927421
3.91	53.5733	0.529697	0.157458	0.131627	0.00523901	0.0940032
3.92	53.7253	0.590365	0.300352	0.0905656	0.00434508	0.0625016
3.93	53.8772	0.650594	0.345979	0.0834543	0.00546078	0.0720094
3.94	54.0291	0.551705	0.286442	0.069359	0.00494927	0.0510816
3.95	54.1811	0.459706	0.142308	0.0759226	0.00611433	0.107969
3.96	54.333	0.473692	0.147826	0.0772583	0.00657185	0.10615
3.97	54.4849	0.48204	0.138186	0.0843766	0.00704422	0.117182
3.98	54.6369	0.502488	0.164573	0.0913066	0.00523952	0.075542
3.99	54.7888	0.444149	0.184041	0.07292	0.00436366	0.0807667
4	54.9408	0.422258	0.177498	0.0702493	0.00422424	0.0539001
4.01	55.0927	0.605845	0.20444	0.117286	0.00687233	0.102945
4.02	55.2446	0.635165	0.177925	0.119949	0.00830624	0.15075
4.03	55.3966	0.620552	0.182477	0.114775	0.00794251	0.148424
4.04	55.5485	0.546681	0.204932	0.0884705	0.0065658	0.100081
4.05	55.7004	0.428828	0.187825	0.0583915	0.00453041	0.081632
4.06	55.8524	0.415551	0.190442	0.0605213	0.00396661	0.0577019
4.07	56.0043	0.370711	0.148692	0.060452	0.00380266	0.0721789
4.08	56.1562	0.438597	0.204574	0.0700621	0.00363543	0.0482489
4.09	56.3082	0.474971	0.234205	0.0688851	0.00390064	0.0646312
4.1	56.4601	0.485269	0.250536	0.0619892	0.0039467	0.0626663
4.11	56.612	0.42697	0.266647	0.0430058	0.0022067	0.0267716
4.12	56.764	0.465648	0.295005	0.045508	0.00252739	0.0340611
4.13	56.9159	0.415945	0.265196	0.0394751	0.00228207	0.0282544
4.14	57.0678	0.430479	0.252826	0.0489892	0.00276942	0.0384355
4.15	57.2198	0.476602	0.27755	0.0536516	0.00305717	0.0491265
4.16	57.3717	0.543292	0.333022	0.0598491	0.00315381	0.0398384
4.17	57.5236	0.491422	0.292383	0.0553603	0.00312737	0.0428259
4.18	57.6831	0.594783	0.36808	0.063245	0.0037389	0.0466651
4.19	57.86	0.671483	0.462233	0.0511178	0.00320404	0.0355543
4.2	58.0369	0.692919	0.501841	0.0450412	0.00239797	0.026222
4.21	58.2137	0.884043	0.58282	0.0711598	0.00544774	0.0652615
4.22	58.3906	0.894554	0.580085	0.0764004	0.00587943	0.0787334
4.23	58.5675	0.86916	0.533951	0.0863536	0.00575119	0.077009
4.24	58.7444	0.869882	0.547068	0.0877431	0.00510776	0.0638519
4.25	58.9213	0.876808	0.464647	0.123028	0.00751901	0.109895
4.26	59.0982	0.893179	0.490177	0.123801	0.0068996	0.110512
4.27	59.2751	0.902761	0.585538	0.0820623	0.00506029	0.0649098
4.28	59.452	1.00227	0.675711	0.0854786	0.00497249	0.059772
4.29	59.6289	1.06982	0.725057	0.0840113	0.00537865	0.0652979
4.3	59.8058	0.904289	0.585723	0.0825623	0.0050729	0.0638662
4.31	59.9827	0.838773	0.545327	0.0755173	0.00470064	0.056674
4.32	60.1596	0.82018	0.45243	0.0977561	0.00708648	0.0858311
4.33	60.3365	0.79112	0.334241	0.148785	0.00862834	0.113909
4.34	60.5133	0.707544	0.363204	0.109948	0.00568939	0.0765178
4.35	60.6902	0.639371	0.374794	0.0780552	0.00398473	0.0464189
4.36	60.8671	0.731684	0.384905	0.0960286	0.005763	0.0862701
4.37	61.044	0.803355	0.489401	0.0779476	0.00568848	0.0690729
4.38	61.2209	0.898845	0.582774	0.0836656	0.00506186	0.0735759
4.39	61.3978	0.863256	0.591342	0.073325	0.00337044	0.0420316
4.4	61.5747	0.834079	0.56404	0.0709118	0.00386782	0.0517556
4.41	61.7516	0.882002	0.595459	0.0736459	0.00445295	0.0513462
4.42	61.9285	0.661884	0.489219	0.036009	0.00217754	0.0258062
4.43	62.1037	0.559043	0.415497	0.0285879	0.00173399	0.0248002
4.44	62.2719	0.586839	0.415026	0.0382367	0.00251772	0.0305684
4.45	62.4402	0.692868	0.458141	0.0588613	0.00388951	0.0561771
4.46	62.6084	0.695034	0.478491	0.0578121	0.00306513	0.039322
4.47	62.7767	0.74942	0.493622	0.0798624	0.00315516	0.0400503
4.48	62.9449	0.802411	0.476021	0.115403	0.00424442	0.0456632
4.49	63.1132	0.971545	0.539118	0.167504	0.00555686	0.0660955
4.5	63.2814	0.939774	0.600899	0.11814	0.00394568	0.0426827
4.51	63.4497	0.946021	0.605009	0.114289	0.00420383	0.0477758
4.52	63.6179	1.20549	0.738593	0.155497	0.00623669	0.0861042
4.53	63.7862	1.08931	0.640229	0.15407	0.00648986	0.0818453
4.54	63.9545	1.00265	0.579345	0.14502	0.00645915	0.0789791
4.55	64.1227	1.02089	0.676692	0.10304	0.00531697	0.0547789
4.56	64.3603	1.30607	0.870357	0.138381	0.00605679	0.0556359
4.57	64.644	1.15573	0.619326	0.218477	0.00729496	0.107235
4.58	64.9278	1.11836	0.700219	0.162195	0.00432161	0.0446528
4.59	65.2116	1.27058	0.880981	0.135245	0.00278058	0.0320751
4.6	65.4954	1.12761	0.670453	0.185563	0.00487262	0.0440361
4.61	65.7791	1.11232	0.542682	0.259712	0.00637223	0.0519184
4.62	66.0629	1.36481	0.809736	0.236348	0.00543346	0.0603943
4.63	66.3465	1.18767	0.747285	0.174573	0.00420673	0.0507101
4.64	66.6254	1.15939	0.710241	0.184195	0.00418207	0.0474815
4.65	66.9041	1.66787	1.02629	0.255117	0.00677937	0.0780561
4.66	67.1828	1.81658	1.18717	0.24594	0.00536031	0.0587043
4.67	67.4615	1.27181	0.796365	0.191812	0.00442158	0.0426635
4.68	67.7403	1.21795	0.697548	0.237951	0.00429613	0.0374166
4.69	68.019	1.38619	0.758654	0.307243	0.00439518	0.0329263
4.7	68.2977	1.54168	0.848575	0.332274	0.00568266	0.0559649
4.71	68.5764	1.51259	0.930541	0.258264	0.00395856	0.0397361
4.72	68.8551	1.43986	0.95636	0.182011	0.00415488	0.0484885
4.73	69.1338	1.66236	1.13665	0.145838	0.00883018	0.0801192
4.74	69.4126	1.64715	1.19235	0.121914	0.00633426	0.0600013
4.75	69.6913	1.42527	1.10433	0.0665227	0.0028806	0.0305166
4.76	69.9666	1.13125	0.825867	0.0779844	0.00368864	0.0408877
4.77	70.1313	0.812255	0.465622	0.11217	0.00679171	0.084136
4.78	70.2927	0.759116	0.412444	0.119113	0.00687537	0.0584657
4.79	70.454	0.74713	0.504498	0.0764466	0.00335127	0.0312468
4.8	70.6153	0.860378	0.593645	0.076039	0.00378435	0.0395499
4.81	70.7767	0.995049	0.646801	0.110109	0.00668441	0.0592919
4.82	70.938	0.83131	0.564681	0.0807844	0.00427085	0.0416507
4.83	71.0993	1.12093	0.80983	0.0833964	0.00381546	0.046809
4.84	71.2927	1.35026	0.980123	0.0922181	0.00464576	0.062186
4.85	71.518	1.40537	0.980893	0.13011	0.0063818	0.058287
4.86	71.7433	1.68587	1.12557	0.174024	0.00917801	0.0918321
4.87	71.9686	1.89004	1.39787	0.108746	0.0066916	0.0896435
4.88	72.1939	1.95246	1.50996	0.0756674	0.00495644	0.0733204
4.89	72.4192	1.64252	1.26105	0.074462	0.00482076	0.0483028
4.9	72.6446	1.09799	0.766079	0.0911568	0.00572066	0.0520162
4.91	72.8699	1.59275	1.03727	0.190974	0.00777059	0.0716935
4.92	73.2003	2.14895	1.53899	0.181087	0.0067093	0.078787
4.93	73.6009	2.68818	1.88829	0.242954	0.00992589	0.107421
4.94	74.0015	2.71183	1.95169	0.235308	0.00686943	0.0549254
4.95	74.4021	2.43528	1.65648	0.263276	0.00952286	0.0916699
4.96	74.8027	3.09776	2.12534	0.31459	0.0124237	0.146424
4.97	75.2032	2.81144	2.05017	0.212925	0.00792815	0.0766389
4.98	75.6038	2.52382	1.79777	0.211637	0.0101459	0.119544
4.99	76.0044	2.95838	2.22317	0.187665	0.00760053	0.0732415
5	76.402	2.12624	1.51232	0.184148	0.00676366	0.0694808
5.01	76.6495	1.85773	1.2089	0.227864	0.0102924	0.0984185
5.02	76.894	1.74438	1.24461	0.160743	0.00450081	0.0388606
5.03	77.1385	1.57645	1.15046	0.130317	0.00353708	0.0299211
5.04	77.383	1.57972	1.14887	0.131743	0.00342623	0.0370536
5.05	77.6276	1.47836	1.0205	0.158069	0.00425917	0.0455858
5.06	77.8721	1.77396	1.08276	0.277826	0.00801836	0.0865439
5.07	78.1166	1.81737	1.18479	0.2413	0.00657675	0.0570639
5.08	78.3611	1.65513	1.10371	0.221334	0.00384978	0.0263224
5.09	78.6056	1.81969	1.22175	0.235674	0.00460494	0.050188
5.1	78.8501	1.90764	1.21399	0.294741	0.00588763	0.049609
5.11	79.0946	2.0147	1.41141	0.213224	0.00508372	0.049834
5.12	79.3392	1.80467	1.2539	0.197616	0.00483032	0.0473743
5.13	79.5837	1.40751	1.00619	0.134009	0.00333604	0.0349966
5.14	79.8282	1.63758	1.13617	0.184554	0.00379914	0.0331318
5.15	80.0727	1.73697	1.27076	0.125253	0.00574423	0.0494308
5.16	80.3172	1.79491	1.11588	0.212389	0.0145257	0.141328
5.17	80.5617	1.82684	1.20897	0.209145	0.00975273	0.0790369
5.18	80.8063	1.5602	1.04863	0.18127	0.00689102	0.0595134
5.19	81.0508	1.31201	0.916249	0.1238	0.00560703	0.0462253
5.2	81.2953	1.40259	0.894325	0.178869	0.00823394	0.0763434
5.21	81.5398	1.65924	1.03024	0.230784	0.0108995	0.102245
5.22	81.7843	1.59778	1.13903	0.146068	0.00506439	0.0416743
5.23	82.0288	1.52901	1.04261	0.172802	0.00523789	0.0460686
5.24	82.2888	1.6251	1.0929	0.196989	0.00567579	0.0438106
5.25	82.5848	1.97812	1.22197	0.308931	0.00941409	0.083337
5.26	82.8809	1.95045	1.20459	0.3315	0.0062451	0.0522633
5.27	83.1769	1.86844	1.2506	0.243301	0.00560636	0.0469624
5.28	83.4729	1.98976	1.21542	0.354455	0.00573964	0.0488803
5.29	83.7689	1.77945	1.15253	0.265784	0.00416759	0.0419292
5.3	84.065	1.4748	0.902873	0.26087	0.00374442	0.0373846
5.31	84.361	1.63246	1.00669	0.278485	0.00457716	0.031373
5.32	84.657	1.77688	1.2561	0.174337	0.00466513	0.0440405
5.33	84.953	1.61356	1.17397	0.133892	0.00376447	0.0449409
5.34	85.2491	1.46791	0.996732	0.17603	0.0040299	0.0285935
5.35	85.5451	1.92284	0.983971	0.430834	0.011568	0.0887558
5.36	85.8411	1.79977	0.966604	0.368056	0.011185	0.0776908
5.37	86.1372	1.7723	1.03417	0.32163	0.00922299	0.0688273
5.38	86.4332	1.52967	0.880936	0.284742	0.0074877	0.0607225
5.39	86.7292	1.53064	0.835173	0.301676	0.00972219	0.096903
5.4	87.0252	1.75776	1.03346	0.306529	0.00946493	0.096468
5.41	87.3213	1.59102	1.09983	0.175535	0.00446144	0.0388838
5.42	87.6173	1.65872	0.998928	0.240983	0.011416	0.112357
5.43	87.9133	1.76589	1.14432	0.211279	0.0103226	0.0672234
5.44	88.2093	1.62543	1.02546	0.199614	0.0116047	0.100834
5.45	88.5054	1.73308	1.05816	0.249572	0.0106645	0.0989251
5.46	88.8014	2.10504	1.24266	0.337827	0.0139253	0.0981586
5.47	89.0974	2.2204	1.23456	0.4547	0.0113531	0.0904182
5.48	89.3934	1.92528	1.24017	0.279263	0.00647214	0.0502212
5.49	89.6895	1.38722	0.88055	0.217457	0.00410452	0.0324886
5.5	89.9855	1.46771	0.873351	0.258002	0.00674186	0.054352
5.51	90.2815	1.60326	1.13702	0.153085	0.00486743	0.0361991
5.52	90.5775	1.48371	1.03107	0.149221	0.00580223	0.0401429
5.53	90.8736	1.43429	0.983554	0.155362	0.00547142	0.0463262
5.54	91.1751	1.57778	1.03607	0.21277	0.0054026	0.0504876
5.55	91.5265	2.20183	1.03018	0.561793	0.0157026	0.16674
5.56	91.8778	1.95461	1.36959	0.200357	0.00608706	0.0484111
5.57	92.2292	1.98134	1.29363	0.269705	0.006872	0.0645883
5.58	92.5805	2.05218	1.35157	0.285403	0.00579904	0.0256545
5.59	92.9319	1.95452	1.28193	0.259266	0.00721222	0.0615853
5.6	93.2832	1.83298	1.09552	0.314456	0.00915233	0.0626105
5.61	93.6346	1.76252	1.16639	0.236877	0.00591377	0.0372472
5.62	93.9915	2.11558	1.49978	0.197758	0.00711982	0.0586481
5.63	94.3508	2.02591	1.32479	0.255166	0.00917922	0.0746687
5.64	94.7102	1.99789	1.35446	0.225822	0.00758803	0.0614159
5.65	95.0695	2.6139	1.58622	0.439688	0.011827	0.0892839
5.66	95.4288	2.23862	1.59723	0.185878	0.00824244	0.0571184
5.67	95.7881	2.35469	1.59176	0.250813	0.0110364	0.109011
5.68	96.1475	1.76177	1.11572	0.253731	0.00768345	0.0684299
5.69	96.5068	2.01527	1.40703	0.203068	0.00672047	0.0565122
5.7	96.8661	2.53069	1.63925	0.329074	0.0106875	0.0901329
5.71	97.2254	2.18827	1.20082	0.413195	0.016166	0.174967
5.72	97.5848	2.23693	1.564	0.218679	0.0076785	0.0946909
5.73	97.9441	1.98449	1.43736	0.16349	0.00570715	0.0526043
5.74	98.2352	1.52421	0.986791	0.207947	0.00613146	0.0587635
5.75	98.5189	1.72522	0.903095	0.399153	0.00858719	0.0484648
5.76	98.8025	1.86907	0.900302	0.461291	0.0121974	0.0841653
5.77	99.0861	1.93544	1.07342	0.383916	0.0104521	0.096367
5.78	99.3697	1.79098	1.14828	0.25411	0.00686097	0.0548675
5.79	99.6533	1.67077	1.01827	0.234926	0.010435	0.0823459
5.8	99.9369	1.91723	0.815477	0.393204	0.0259056	0.316869
5.81	100.221	1.6563	0.905194	0.264746	0.015284	0.100588
5.82	100.504	1.84332	0.846386	0.390704	0.0196109	0.197004
5.83	100.788	2.01607	1.18792	0.350405	0.00989907	0.0858647
5.84	101.071	1.74052	1.03131	0.300362	0.00920124	0.0816542
5.85	101.355	1.88523	1.10838	0.346786	0.00770636	0.048465
5.86	101.639	1.67295	1.08397	0.236633	0.00560145	0.0441734
5.87	101.922	2.05064	1.36487	0.256233	0.00688286	0.0716334
5.88	102.206	1.84615	1.16331	0.279984	0.00771329	0.0547008
5.89	102.489	1.45178	1.03248	0.13426	0.00446634	0.0436192
5.9	102.773	1.55375	0.853545	0.284634	0.0111063	0.0873713
5.91	103.057	1.83316	1.09202	0.312259	0.00883398	0.0579038
5.92	103.34	2.28481	1.46799	0.316337	0.00949637	0.0904093
5.93	103.624	1.73351	1.21074	0.171436	0.00548184	0.0528856
5.94	103.896	1.38633	0.851404	0.192409	0.00825765	0.0804206
5.95	104.097	1.11012	0.624451	0.194409	0.00814444	0.0676432
5.96	104.295	0.895872	0.483229	0.186978	0.00496579	0.037056
5.97	104.493	0.836205	0.468114	0.175919	0.00311597	0.0250201
5.98	104.697	1.29236	0.796969	0.215543	0.00503833	0.0436629
5.99	105.001	1.68137	1.13086	0.200066	0.00649153	0.0464138
6	105.339	2.1162	1.38628	0.262246	0.0111359	0.103091
6.01	105.676	1.57483	1.15231	0.128744	0.00362946	0.033825
6.02	106.014	1.57914	1.16541	0.107646	0.00501369	0.0486474
6.03	106.343	1.62727	1.19081	0.124026	0.00508573	0.0452968
6.04	106.667	1.56918	1.10052	0.147096	0.00634883	0.066074
6.05	106.991	1.78688	1.3272	0.125088	0.00486836	0.0437885
6.06	107.309	1.66633	1.22986	0.122135	0.00419108	0.0395919
6.07	107.625	1.79351	1.23141	0.181954	0.00781367	0.0770362
6.08	107.942	1.94409	1.35266	0.196211	0.00716113	0.0572187
6.09	108.258	1.88485	1.37001	0.162311	0.00395	0.0394663
6.1	108.581	2.18327	1.48955	0.264281	0.00487796	0.0413228
6.11	108.928	1.73403	1.13966	0.221622	0.00669432	0.0593986
6.12	109.275	2.10455	1.324	0.319451	0.0096618	0.0597103
6.13	109.622	2.3401	1.61166	0.275201	0.0053547	0.0477084
6.14	109.981	2.37015	1.60327	0.309765	0.00454529	0.040342
6.15	110.391	2.02385	1.32445	0.293281	0.00471844	0.04477
6.16	110.801	2.46476	1.59259	0.366764	0.00683995	0.0686338
6.17	111.21	2.52358	1.77144	0.271068	0.00640098	0.0528931
6.18	111.62	2.80403	1.96306	0.309266	0.00587991	0.0453609
6.19	112.03	3.04477	2.16607	0.29816	0.00788128	0.0695077
6.2	112.44	2.92209	2.12513	0.228749	0.00862584	0.0983064
6.21	112.85	2.79073	2.12185	0.158915	0.00712947	0.0704471
6.22	113.26	3.15356	2.37447	0.210931	0.00622965	0.0584258
6.23	113.636	2.74604	1.91223	0.284622	0.00851945	0.0685257
6.24	113.99	2.21949	1.48985	0.262036	0.00926336	0.0812453
6.25	114.344	2.74754	1.98828	0.243691	0.00590471	0.0627451
6.26	114.698	2.57079	1.92403	0.178827	0.00509171	0.0545583
6.27	115.052	2.38287	1.81898	0.140332	0.00475511	0.0451452
6.28	115.406	1.99601	1.51743	0.118827	0.00434171	0.0374122
6.29	115.761	2.57211	1.89724	0.171216	0.00987146	0.111799
6.3	116.171	3.74827	2.80981	0.262415	0.00813316	0.078729
6.31	116.806	4.44318	3.30879	0.320415	0.0101909	0.0861493
6.32	117.441	4.36739	3.19496	0.328365	0.0133693	0.15339
6.33	118.076	4.73335	3.39172	0.429449	0.0130814	0.124125
6.34	118.711	4.09426	2.99785	0.331721	0.00952996	0.100641
6.35	119.182	3.67166	2.77928	0.226002	0.00799746	0.0841705
6.36	119.612	3.64787	2.62525	0.299231	0.0119031	0.0966889
6.37	120.042	3.24605	2.28129	0.313323	0.011058	0.0817737
6.38	120.472	2.6755	1.92778	0.230304	0.00731175	0.0624684
6.39	120.902	2.7429	1.62281	0.441248	0.0170533	0.161356
6.4	121.204	2.34788	1.49358	0.352958	0.00859785	0.0533759
6.41	121.491	2.46179	1.64031	0.320103	0.0068381	0.0615172
6.42	121.778	2.37631	1.49304	0.384847	0.00694105	0.0579564
6.43	122.062	2.35258	1.46843	0.389742	0.0067481	0.0489003
6.44	122.311	1.94225	1.31716	0.23791	0.00520339	0.0441651
6.45	122.556	1.82149	1.21239	0.241258	0.00475212	0.0421107
6.46	122.8	2.13602	1.41562	0.275628	0.00731128	0.0524697
6.47	123.065	2.3004	1.58559	0.261962	0.00595795	0.0530504
6.48	123.399	2.66329	1.76499	0.365732	0.00627805	0.0582725
6.49	123.736	2.64949	1.58213	0.495797	0.00759853	0.0570963
6.5	124.072	2.3398	1.3514	0.464109	0.00854323	0.0455404
6.51	124.408	2.62197	1.45431	0.543762	0.0119114	0.10649
6.52	124.744	2.53838	1.54512	0.457063	0.00734215	0.0431216
6.53	125.08	2.45344	1.31804	0.58254	0.00746926	0.0346354
6.54	125.416	2.44352	1.68501	0.278466	0.00632868	0.0561037
6.55	125.752	2.742	1.78799	0.364983	0.00964706	0.0891139
6.56	126.083	2.09661	1.29385	0.325236	0.010079	0.0744443
6.57	126.264	1.34288	0.91161	0.152951	0.00491039	0.0380507
6.58	126.402	1.702	1.0339	0.273473	0.00808979	0.071177
6.59	126.659	2.4764	1.59117	0.346988	0.00937779	0.056258
6.6	127.001	2.23327	1.42955	0.317428	0.00875231	0.0588016
6.61	127.342	2.5964	1.54129	0.477517	0.00970037	0.053947
6.62	127.683	2.65734	1.68625	0.424335	0.00677405	0.0634356
6.63	128.025	2.01698	1.24579	0.343094	0.00660301	0.0426773
6.64	128.366	1.95125	1.19997	0.329341	0.00705009	0.0514228
6.65	128.708	2.24915	1.42095	0.354573	0.00695551	0.0424765
6.66	129.049	2.26295	1.49683	0.297937	0.0072732	0.0547916
6.67	129.39	2.26865	1.59513	0.240262	0.00538567	0.0484732
6.68	129.784	3.02122	1.88972	0.487479	0.0102063	0.0681989
6.69	130.257	3.13581	1.80259	0.634113	0.011378	0.0775198
6.7	130.73	3.30912	1.93915	0.64703	0.0109424	0.0604804
6.71	131.202	2.96183	1.94655	0.421528	0.00794461	0.0470895
6.72	131.675	2.60055	1.58408	0.473358	0.00639021	0.0610127
6.73	132.147	2.70862	1.37036	0.717562	0.00842007	0.0466522
6.74	132.62	2.63574	1.26773	0.758022	0.00767829	0.032379
6.75	133.094	3.57156	1.98271	0.806798	0.0111097	0.0645949
6.76	133.637	3.11945	1.82791	0.631714	0.00775709	0.0414322
6.77	134.189	3.07215	1.91969	0.521084	0.00852623	0.042574
6.78	134.74	3.17387	1.71658	0.728171	0.0126135	0.0871047
6.79	135.293	3.20289	1.85506	0.662273	0.00926572	0.0593126
6.8	135.877	3.29851	1.89468	0.688433	0.00991032	0.05767
6.81	136.464	3.61244	2.23075	0.628999	0.0109136	0.0617494
6.82	137.052	3.85962	2.15311	0.867404	0.0115952	0.0452529
6.83	137.64	3.74212	1.98325	0.938072	0.00920965	0.0488826
6.84	138.227	3.31651	1.94513	0.677857	0.00761504	0.0361243
6.85	138.829	3.49157	2.08344	0.673008	0.00936069	0.0703793
6.86	139.453	4.00949	2.27516	0.868966	0.0114059	0.0423052
6.87	140.076	3.45608	1.79867	0.892293	0.00860001	0.0418528
6.88	140.7	3.57526	1.91305	0.88163	0.00745778	0.0400713
6.89	141.518	4.9402	2.48899	1.35106	0.0104149	0.0518505
6.9	142.466	5.7049	2.3036	2.01484	0.011023	0.0598766
6.91	143.414	5.02925	2.88941	1.06717	0.0129037	0.0584176
6.92	144.319	3.80551	2.56705	0.492828	0.0102608	0.0745415
6.93	144.834	3.31025	2.31145	0.358969	0.00970306	0.0806184
6.94	145.349	3.10432	2.06222	0.438577	0.00833758	0.0495778
6.95	145.863	2.72936	1.83639	0.371372	0.00584555	0.0355962
6.96	146.377	2.37818	1.65891	0.268254	0.00599489	0.0493158
6.97	146.817	2.36637	1.58929	0.315582	0.00556739	0.0421652
6.98	147.247	2.10243	1.58686	0.124494	0.00670769	0.0574349
6.99	147.544	1.58906	1.25086	0.0640712	0.00361701	0.0342612
7	147.826	1.58537	1.26462	0.0541002	0.00267272	0.023106
7.01	148.108	1.53929	1.20729	0.0637848	0.00365432	0.033864
7.02	148.39	1.47302	1.12886	0.0758147	0.00440581	0.0394247
7.03	148.673	1.5981	1.27236	0.058601	0.00287381	0.0260154
7.04	149.044	2.15973	1.6737	0.111531	0.00403619	0.0407994
7.05	149.504	2.46751	1.9381	0.111656	0.00462514	0.0344801
7.06	149.964	2.41315	1.78923	0.186295	0.00517027	0.0449773
7.07	150.424	2.32561	1.65744	0.236182	0.00443899	0.0388847
7.08	150.899	2.12198	1.51993	0.207073	0.00474013	0.0406427
7.09	151.407	2.37037	1.7178	0.215981	0.00479999	0.0390451
7.1	151.915	2.92981	2.1396	0.254308	0.00560833	0.0516209
7.11	152.424	3.14809	2.34764	0.240687	0.00645782	0.0393505
7.12	152.932	3.57024	2.57784	0.34183	0.00615295	0.0485107
7.13	153.494	4.31001	3.04608	0.454855	0.00918368	0.0877777
7.14	154.08	3.78421	2.7719	0.322634	0.00842762	0.0728114
7.15	154.665	3.94242	2.64771	0.526685	0.00927807	0.0752646
7.16	155.231	3.90195	2.7375	0.441319	0.00660022	0.0586884
7.17	155.75	3.95652	2.83971	0.373736	0.0103072	0.0969507
7.18	156.268	4.9014	3.30826	0.609529	0.0174668	0.124272
7.19	156.787	4.29509	2.97351	0.488374	0.0124609	0.0973199
7.2	157.197	3.3367	2.37493	0.327804	0.00966913	0.0724833
7.21	157.561	3.37616	2.32721	0.389661	0.00982784	0.0861893
7.22	157.924	3.3052	2.09073	0.534353	0.00898919	0.0685377
7.23	158.287	3.42428	2.30615	0.445568	0.00818411	0.0747738
7.24	158.652	3.78346	2.41496	0.586616	0.0122269	0.08785
7.25	159.172	4.15403	2.52733	0.753221	0.0127368	0.0868723
7.26	159.732	4.28855	2.79486	0.627741	0.0116477	0.0797853
7.27	160.292	4.14172	2.84271	0.487859	0.0109522	0.0944097
7.28	160.852	3.95884	2.49827	0.634426	0.0126673	0.0720203
7.29	161.301	3.48774	2.13916	0.618469	0.0110272	0.062452
7.3	161.738	3.49253	2.32849	0.473353	0.0101885	0.0827444
7.31	162.174	3.36464	2.27339	0.429087	0.00858577	0.075367
7.32	162.611	3.07421	2.1356	0.329022	0.00868312	0.07992
7.33	162.999	3.02225	2.1276	0.302353	0.00880293	0.0740946
7.34	163.376	3.21563	2.09823	0.446368	0.0120229	0.0814833
7.35	163.752	2.85627	1.85834	0.392818	0.0120822	0.0835562
7.36	164.129	2.5193	1.54374	0.42629	0.0103266	0.0741857
7.37	164.491	2.77895	1.57057	0.586619	0.0104711	0.0712034
7.38	164.849	2.88695	2.06407	0.268904	0.00751894	0.0656204
7.39	165.206	2.81379	2.08919	0.200759	0.00706363	0.0700947
7.4	165.564	2.67014	2.01559	0.170382	0.00591372	0.0582359
7.41	165.922	2.63724	1.89508	0.238964	0.00684608	0.0659602
7.42	166.279	2.66393	1.67732	0.411066	0.00958108	0.0828938
7.43	166.637	2.40826	1.77531	0.178192	0.00697261	0.0621566
7.44	166.934	1.86825	1.38677	0.127645	0.00582044	0.0502091
7.45	167.171	1.68114	1.24203	0.120935	0.00484101	0.046301
7.46	167.408	1.55862	1.07387	0.151808	0.00748136	0.0553912
7.47	167.645	1.58396	0.949507	0.236756	0.0122097	0.101394
7.48	167.876	1.57093	1.00406	0.198224	0.00978064	0.0803725
7.49	168.084	1.44122	0.993102	0.153801	0.00474351	0.0449878
7.5	168.29	1.44302	0.991277	0.158651	0.00468547	0.0337763
7.51	168.495	1.38933	0.916333	0.178769	0.00583944	0.0440848
7.52	168.701	1.6488	1.10577	0.204805	0.00700275	0.0524589
7.53	169.009	2.32439	1.65345	0.220958	0.00710768	0.0504209
7.54	169.419	2.85622	1.88649	0.376259	0.0110176	0.0887528
7.55	169.83	2.74422	1.92594	0.279723	0.00879431	0.0644818
7.56	170.24	2.90411	2.12885	0.213086	0.0105475	0.102931
7.57	170.625	2.41317	1.80969	0.15442	0.00686624	0.0566148
7.58	170.95	1.82273	1.26633	0.199089	0.00474928	0.0429936
7.59	171.275	1.76693	1.27461	0.164108	0.00325282	0.0342699
7.6	171.593	1.92476	1.44081	0.134461	0.0040395	0.0416616
7.61	171.9	1.93385	1.4732	0.110528	0.00422504	0.0427953
7.62	172.208	1.95589	1.37388	0.194172	0.00594294	0.0512032
7.63	172.516	2.15422	1.30844	0.348729	0.011109	0.0911247
7.64	172.823	2.12563	1.43307	0.251107	0.00794723	0.0595463
7.65	173.114	1.9581	1.34769	0.208228	0.00654551	0.0442182
7.66	173.34	1.71261	1.16381	0.193513	0.00550484	0.051493
7.67	173.566	1.52426	0.783956	0.328193	0.0114345	0.0918168
7.68	173.791	1.50415	0.899	0.264223	0.00653409	0.0502478
7.69	174.017	1.48468	0.960081	0.201728	0.00604456	0.0481535
7.7	174.245	1.82329	1.18249	0.240856	0.00710537	0.0548046
7.71	174.578	2.41144	1.41092	0.461015	0.00968557	0.0648241
7.72	174.94	2.07079	1.09958	0.49255	0.00837722	0.043317
7.73	175.303	2.71378	1.38229	0.668815	0.0120123	0.0795073
7.74	175.666	2.90739	1.41595	0.773783	0.0118481	0.069845
7.75	176.028	2.9998	1.31393	0.902245	0.0150883	0.0761839
7.76	176.391	2.60494	1.29432	0.602493	0.0208612	0.130884
7.77	176.685	1.64213	0.849297	0.322044	0.0144542	0.101218
7.78	176.828	0.967479	0.430835	0.21455	0.0114633	0.0979552
7.79	176.969	0.852019	0.447323	0.152264	0.00833487	0.067534
7.8	177.11	1.02816	0.589374	0.164307	0.00921454	0.0698342
7.81	177.282	1.77149	1.12473	0.238843	0.00935851	0.0680179
7.82	177.575	2.3506	1.42207	0.383864	0.0108544	0.09199
7.83	177.882	2.46503	1.65012	0.303093	0.00898018	0.072192
7.84	178.189	2.35193	1.53907	0.307994	0.0091735	0.0696632
7.85	178.496	1.78435	1.14026	0.245098	0.00927952	0.0630294
7.86	178.771	1.49628	0.803853	0.318092	0.00951947	0.0721545
7.87	178.952	1.26578	0.774637	0.206183	0.00634761	0.0349206
7.88	179.128	1.32965	0.811753	0.186366	0.00942863	0.0740704
7.89	179.314	1.34071	0.779114	0.207383	0.0108046	0.0864067
7.9	179.503	1.29599	0.722927	0.243735	0.00873309	0.0623163
7.91	179.692	1.32125	0.755299	0.254541	0.00693088	0.0346253
7.92	179.881	1.54097	0.810346	0.329624	0.00998011	0.078881
7.93	180.07	1.49142	0.757452	0.35787	0.00838273	0.0495968
7.94	180.26	1.34171	0.856785	0.203713	0.00464408	0.0285496
7.95	180.449	1.29539	0.779684	0.22335	0.00543052	0.041487
7.96	180.637	1.339	0.690302	0.318516	0.00742952	0.0428561
7.97	180.826	1.35207	0.86279	0.195536	0.00646621	0.0410617
7.98	181.02	1.3795	0.937468	0.146515	0.00688499	0.0510401
7.99	181.219	1.56194	1.10095	0.14851	0.00570312	0.0398043
8	181.425	1.77334	1.24228	0.177901	0.00570846	0.0509662
8.01	181.644	1.66678	1.20383	0.142199	0.00485833	0.0317023
8.02	181.843	1.3985	1.05576	0.0871864	0.00318994	0.0291596
8.03	182.013	1.42848	1.07598	0.0861383	0.00365327	0.0403045
8.04	182.245	1.94442	1.41722	0.148634	0.00630891	0.0550392
8.05	182.539	2.31401	1.71447	0.151223	0.00757475	0.077426
8.06	182.833	2.46404	1.74898	0.218462	0.00964545	0.091204
8.07	183.127	2.46753	1.62945	0.305895	0.0117186	0.0909594
8.08	183.421	2.13107	1.44508	0.24114	0.00902508	0.0701322
8.09	183.715	1.78953	1.22006	0.195059	0.00803345	0.0676136
8.1	184.01	2.09623	1.41796	0.238277	0.00880243	0.069039
8.11	184.304	2.20631	1.58713	0.180207	0.0080239	0.079457
8.12	184.598	1.96199	1.4575	0.125251	0.00697917	0.0658514
8.13	184.892	1.54188	1.17518	0.0818826	0.00417883	0.0420313
8.14	185.186	1.90798	1.4465	0.106335	0.00526607	0.0542617
8.15	185.48	1.94902	1.45892	0.115442	0.00674335	0.0653043
8.16	185.774	1.78331	1.29565	0.136338	0.00632008	0.0546855
8.17	186.046	1.48175	1.08547	0.106219	0.005629	0.0503063
8.18	186.725	1.18573	0.992519	0.0771345	0.00290813	0.030553
8.2	186.998	1.21221	0.988251	0.097207	0.00308384	0.0346461
8.22	187.314	1.33753	1.03994	0.146459	0.00362068	0.0407061
8.24	187.693	1.60474	1.20471	0.215497	0.00438377	0.0408092
8.26	188.214	2.16107	1.75013	0.180723	0.00671546	0.0662579
8.28	188.746	2.60357	2.1152	0.192239	0.00894888	0.0927571
8.3	189.478	2.92339	2.3932	0.217238	0.00915791	0.0979957
8.32	190.138	1.92957	1.4659	0.239367	0.00718773	0.0523209
8.34	190.528	1.68092	1.29612	0.177769	0.00731269	0.0621435
8.36	191.004	1.41917	0.797648	0.34459	0.0125863	0.0777397
8.38	191.607	2.57481	2.0446	0.226532	0.00842776	0.0835807
8.4	192.202	2.22572	1.65566	0.271454	0.0113656	0.0948407
8.42	192.787	2.4131	1.7481	0.343752	0.00962797	0.0893135
8.44	193.469	2.91922	2.19096	0.383061	0.00920072	0.0769924
8.46	194.307	2.88274	2.14821	0.372039	0.01314	0.0964015
8.48	194.948	2.16918	1.77071	0.176098	0.0053745	0.054902
8.5	195.343	1.71007	1.41343	0.126135	0.00469794	0.0438231
8.52	195.703	1.57633	1.27977	0.137144	0.00447447	0.0361809
8.54	196.029	1.64197	1.373	0.0933197	0.00609911	0.060976
8.56	196.438	2.36987	1.946	0.137413	0.0142329	0.107693
8.58	197.241	3.30188	2.85441	0.142784	0.00971307	0.0940608
8.6	197.884	1.96588	1.56749	0.183214	0.00558082	0.0599805
8.62	198.296	1.09476	0.736882	0.185188	0.00633905	0.0461374
8.64	198.56	0.767577	0.46582	0.180886	0.0027406	0.0220606
8.66	198.812	0.990392	0.720387	0.139448	0.00402651	0.0345485
8.68	199.146	1.29502	0.945602	0.14826	0.00925075	0.0664169
8.7	199.55	1.32069	0.839177	0.247329	0.0108794	0.0774474
8.72	200.067	1.1558	0.522782	0.374369	0.0104694	0.0684114
8.74	200.437	0.812067	0.411333	0.258911	0.00407559	0.0215594
8.76	200.705	1.00213	0.48942	0.323502	0.00517777	0.0293694
8.78	201.215	2.14855	1.5895	0.272054	0.00817492	0.0680655
8.8	201.839	2.3112	1.61789	0.35871	0.0133458	0.0948515
8.82	202.565	2.78918	2.22795	0.21543	0.0125779	0.106895
8.84	203.259	2.39402	1.91224	0.203601	0.00881978	0.0767954
8.86	203.757	1.79302	1.24928	0.273081	0.00965287	0.0801077
8.88	204.318	2.44173	1.59794	0.52075	0.00861362	0.0429294
8.9	205.202	2.55733	1.60769	0.57988	0.0107785	0.0612714
8.92	205.838	1.494	1.01412	0.257771	0.00777149	0.0563763
8.94	206.104	1.21176	0.905646	0.143901	0.00595736	0.0496169
8.96	206.495	2.17433	1.65491	0.251431	0.00935856	0.0734568
8.98	207.239	2.09252	1.30065	0.430752	0.0151021	0.0941945
9	207.847	1.50461	0.970602	0.309589	0.00687614	0.0509789
9.02	208.207	1.30568	1.00324	0.139081	0.00520958	0.0447858
9.04	208.535	0.946808	0.544303	0.206978	0.00822099	0.0616958
9.06	208.923	0.774591	0.376396	0.191824	0.00877455	0.0633724
9.08	209.183	0.726472	0.365564	0.174704	0.00754435	0.0623431
9.1	209.472	0.995331	0.607945	0.232218	0.00538164	0.0272796
9.12	209.879	1.95205	1.3858	0.307811	0.00773173	0.0534953
9.14	210.587	2.79837	1.98728	0.357961	0.0191406	0.145983
9.16	211.453	2.17294	1.4062	0.392195	0.012702	0.103403
9.18	211.961	1.26057	0.821952	0.257474	0.00513722	0.0326627
9.2	212.209	0.704005	0.431159	0.167973	0.00326797	0.0149019
9.22	212.409	0.543938	0.344982	0.116776	0.00252514	0.0140035
9.24	212.556	0.453279	0.256855	0.126961	0.00169282	0.00745256
9.26	212.703	0.530527	0.341393	0.109593	0.00277788	0.0161201
9.28	212.891	0.759381	0.516561	0.138691	0.00276845	0.0199954
9.3	213.143	0.802154	0.535541	0.141524	0.00397358	0.0279214
9.32	213.395	0.896711	0.589966	0.166387	0.00489052	0.0315231
9.34	213.7	1.46806	0.940446	0.31721	0.00662313	0.0365919
9.36	214.2	2.01311	1.55075	0.219368	0.0064986	0.0610508
9.38	214.709	1.75449	1.30438	0.234791	0.00630619	0.0456981
9.4	215.098	1.31505	1.02359	0.134357	0.00454402	0.0399672
9.42	215.352	1.10501	0.824998	0.141918	0.00378323	0.0303527
9.44	215.66	1.23618	0.847152	0.206085	0.00555112	0.0454911
9.46	216.055	0.848035	0.496346	0.223239	0.00390211	0.0149638
9.48	216.212	1.05404	0.640821	0.25356	0.00403514	0.0206799
9.5	216.74	1.65761	0.908944	0.418084	0.0116657	0.0794333
9.52	217.361	1.81687	1.21994	0.330495	0.00793778	0.0549495
9.54	217.808	0.947682	0.483846	0.262741	0.00713968	0.0465377
9.56	218.077	0.572718	0.228326	0.19859	0.00443807	0.037646
9.58	218.292	0.621721	0.355938	0.143442	0.00415392	0.0294668
9.6	218.506	0.588914	0.309372	0.17759	0.00290817	0.0138534
9.62	218.737	0.966722	0.562239	0.254291	0.00412199	0.0216562
9.64	219.156	1.4391	0.902706	0.320109	0.00611859	0.0431404
9.66	219.673	1.38573	0.671688	0.468172	0.0056264	0.0308642
9.68	220.212	1.61742	1.03863	0.276043	0.0133067	0.0918122
9.7	220.733	1.23164	0.401203	0.431349	0.0135089	0.128941
9.72	221.411	1.06317	-0.0169303	0.682188	0.0099331	0.106127
9.74	221.982	0.91861	0.180776	0.456177	0.00837881	0.0653144
9.76	222.367	0.655242	0.129994	0.258621	0.0097153	0.0922001
9.78	222.682	0.940448	0.294656	0.306109	0.0133687	0.116139
9.8	223.303	2.6364	1.85127	0.37662	0.0147951	0.113502
9.82	224.203	1.93992	0.901634	0.490354	0.0205574	0.179152
9.84	225.019	3.14673	2.28007	0.444513	0.012197	0.0925478
9.86	225.835	2.21211	1.2757	0.513607	0.0170324	0.0938031
9.88	226.531	2.14564	1.12709	0.535088	0.0196895	0.121198
9.9	227.376	2.76157	1.64371	0.582033	0.0222784	0.140824
9.92	228.333	2.24973	1.41986	0.452839	0.0128591	0.094098
9.94	228.87	1.73238	1.12557	0.360972	0.00674641	0.0465354
9.96	229.352	1.5216	0.84452	0.342462	0.012072	0.103877
9.98	230.007	2.29109	1.58637	0.328032	0.0133072	0.107475
10	230.732	2.26288	1.55374	0.400724	0.0085969	0.0616933
10.02	231.457	2.03609	1.21258	0.50543	0.00932646	0.0572695
10.04	232.144	2.03231	1.27208	0.427475	0.0112138	0.0738385
10.06	232.805	2.31999	1.49222	0.419265	0.0152211	0.109325
10.08	233.657	2.74609	1.95053	0.387411	0.0143263	0.104041
10.1	234.512	3.12447	2.38233	0.365371	0.0109125	0.0876651
10.12	235.291	2.68328	1.81353	0.501967	0.00996087	0.0649357
10.14	236.059	1.8154	0.85498	0.658079	0.00678556	0.0192318
10.16	236.623	1.94952	1.33383	0.361757	0.00583823	0.0401028
10.18	237.182	1.72446	1.06743	0.419055	0.00562513	0.0252185
10.2	237.727	1.68476	0.960474	0.481685	0.00507517	0.0205694
10.22	238.266	1.46686	0.389743	0.770155	0.00612646	0.0155541
10.24	239.011	2.49885	1.26434	0.76398	0.00915213	0.0493148
10.26	240.002	2.32146	1.09981	0.832707	0.00772991	0.0280783
10.28	240.81	1.94765	1.01585	0.629844	0.00729261	0.0222498
10.3	241.48	1.77525	1.0014	0.504577	0.00811689	0.0411914
10.32	242.138	1.75808	0.955416	0.537853	0.00619255	0.0228123
10.34	242.806	1.75712	1.04416	0.385952	0.0126002	0.0832118
10.36	243.35	1.26008	0.733981	0.266251	0.00950913	0.07119
10.38	243.641	0.960442	0.643406	0.168595	0.00506873	0.0339736
10.4	243.898	0.717778	0.361114	0.203634	0.0051434	0.0322733
10.42	244.167	0.691525	0.29812	0.270449	0.00271558	0.00907915
10.44	244.452	0.68248	0.21656	0.3301	0.00179539	0.00716306
10.46	244.737	0.857641	0.559709	0.172462	0.00354932	0.0245435
10.48	245.022	0.864716	0.562274	0.179973	0.00316227	0.0241254
10.5	245.307	0.813109	0.467869	0.220044	0.00286887	0.0160411
10.52	245.591	0.846269	0.417837	0.291786	0.0027992	0.0109064
10.54	245.876	0.735319	0.338607	0.266972	0.00287269	0.0128452
10.56	246.161	0.869182	0.550598	0.194785	0.00285958	0.0195589
10.58	246.521	1.26772	0.782121	0.268501	0.00730367	0.045893
10.6	246.977	1.535	0.886652	0.426738	0.0049832	0.0202044
10.62	247.437	1.52381	0.986819	0.277813	0.00922366	0.0617885
10.64	247.904	1.60685	0.722703	0.513462	0.0119207	0.077406
10.66	248.598	2.20725	1.50105	0.343092	0.0112167	0.0924953
10.68	249.179	1.76034	1.16196	0.232991	0.0124758	0.117133
10.7	249.649	1.75278	0.945944	0.311581	0.0186276	0.164441
10.72	250.317	3.17489	2.50166	0.273147	0.0113597	0.106372
10.74	251.147	3.08998	1.98627	0.48269	0.0257636	0.194207
10.76	252.194	3.26504	2.41939	0.427171	0.0139821	0.0903849
10.78	252.838	2.29429	1.76497	0.251306	0.0070394	0.0711984
10.8	253.326	2.2491	1.66596	0.260085	0.011871	0.101541
10.82	254.032	2.55683	1.85145	0.350321	0.0109238	0.0910696
10.84	254.721	1.73633	1.18319	0.312374	0.0059672	0.0424333
10.86	255.006	0.902353	0.592403	0.171159	0.00391115	0.0294289
10.88	255.28	1.29409	0.854667	0.239865	0.00726839	0.0435402
10.9	255.747	2.0558	1.56061	0.231077	0.00729391	0.066952
10.92	256.27	2.70922	2.07538	0.294709	0.01017	0.0930236
10.94	257.069	3.22088	2.3242	0.50734	0.00895185	0.0622658
10.96	257.881	2.62457	1.75435	0.515183	0.00852886	0.0593804
10.98	258.569	1.80773	0.875265	0.558365	0.00593021	0.0240759
11	259.086	1.71147	1.03347	0.423035	0.00772762	0.0372712
11.02	259.633	1.68393	0.967453	0.468057	0.00568792	0.0241827
11.04	260.161	1.29884	0.370618	0.656199	0.00557696	0.0136321
11.06	260.689	1.09873	0.120495	0.717469	0.00271614	0.0115318
11.08	261.18	1.09013	0.280491	0.586863	0.0030155	0.0114416
11.1	261.628	0.882433	0.383974	0.349314	0.0029633	0.0092617
11.12	262.018	1.12825	0.407558	0.48285	0.00558103	0.0381392
11.14	262.533	2.86609	1.76861	0.637936	0.0152258	0.0915637
11.16	263.732	3.99635	2.65967	0.783094	0.0161882	0.110922
11.18	264.77	2.6593	1.49773	0.653991	0.0178633	0.116858
11.2	265.526	2.62756	1.72274	0.535686	0.0101213	0.0613486
11.22	266.282	2.42388	1.73459	0.379499	0.0081602	0.0633385
11.24	266.772	1.70672	1.1607	0.318694	0.00525503	0.0399777
11.26	267.239	1.89319	1.40579	0.257248	0.00649599	0.0503323
11.28	267.707	2.05328	1.7159	0.134293	0.00540645	0.0543446
11.3	268.076	1.57087	1.18266	0.189758	0.00638405	0.0508548
11.32	268.445	1.58111	1.19809	0.19573	0.00532157	0.0458316
11.34	268.848	1.97801	1.55194	0.198851	0.00747527	0.0568234
11.36	269.325	2.20979	1.74627	0.207249	0.00924653	0.0677317
11.38	269.801	1.8957	1.43936	0.222475	0.00783693	0.0597367
11.4	270.283	2.04813	1.52591	0.280303	0.00611118	0.0465288
11.42	270.78	1.58262	0.875137	0.480003	0.00349757	0.0166106
11.44	271.25	1.51253	0.965757	0.357713	0.00357593	0.015875
11.46	271.702	1.48209	0.657473	0.58179	0.00274375	0.0155555
11.48	272.395	3.03179	2.43348	0.291043	0.00686434	0.0590869
11.5	273.089	3.46405	2.97492	0.174924	0.00733942	0.0868826
11.52	273.782	3.45122	2.88161	0.238866	0.00806066	0.079072
11.54	274.476	3.53997	3.03297	0.194291	0.00726773	0.0719236
11.56	275.174	4.48516	3.896	0.207784	0.00839286	0.0871499
11.58	276.197	4.71274	3.99988	0.275779	0.0107654	0.107677
11.6	277.057	4.03834	3.07558	0.534245	0.00824335	0.0730187
11.62	278.07	4.40741	3.44689	0.495585	0.00984591	0.102386
11.64	279.106	4.64271	3.85036	0.3173	0.0113022	0.121293
11.66	279.945	4.44543	3.78471	0.214577	0.0123099	0.119504
11.68	280.773	5.11642	4.1597	0.425768	0.0148339	0.124746
11.7	281.931	5.6835	4.90078	0.289552	0.0114349	0.12198
11.72	282.944	3.62906	2.65069	0.511959	0.0128628	0.102929
11.74	283.679	4.11949	3.46434	0.268645	0.0104101	0.0921052
11.76	284.471	4.25315	3.55601	0.28261	0.0126256	0.111099
11.78	285.371	4.24096	3.17391	0.576265	0.0137387	0.103972
11.8	286.406	4.84139	4.05949	0.307358	0.0134789	0.127453
11.82	287.406	3.80864	2.9098	0.464264	0.0123841	0.0928204
11.84	288.187	2.83553	2.08513	0.409252	0.0102439	0.0673536
11.86	288.797	2.29279	1.84466	0.201731	0.0078787	0.0643869
11.88	289.217	2.53334	1.89652	0.330499	0.00860161	0.0730852
11.9	289.962	3.71023	2.85376	0.438864	0.0131918	0.0972316
11.92	290.909	4.41158	2.98684	0.804496	0.0216689	0.144915
11.94	292.228	5.95253	4.49554	0.764336	0.0200793	0.144813
11.96	293.66	6.205	4.9096	0.602228	0.0220027	0.180296
11.98	295	5.09177	3.59102	0.83566	0.0245903	0.159775
12	296.568	4.32335	2.34838	1.3014	0.01622	0.0911827
12.02	297.971	6.05995	4.65283	0.696719	0.026645	0.179135
12.04	299.323	6.43582	5.25341	0.502728	0.0209225	0.186638
12.06	300.718	7.73823	5.71742	1.06187	0.0236047	0.200527
12.08	302.738	7.26775	4.85906	1.42083	0.0265903	0.160452
12.1	304.763	9.19361	7.02691	1.11746	0.0304515	0.24568
12.12	306.962	8.66651	6.67493	1.02248	0.0238483	0.225002
12.14	308.547	8.46877	6.89383	0.735668	0.0224875	0.193484
12.16	310.244	6.91695	5.61294	0.630002	0.0164037	0.136804
12.18	311.533	3.74725	2.3091	0.952401	0.00847284	0.0393297
12.2	312.379	2.51653	1.24803	0.876319	0.00562336	0.0367056
12.22	313.063	3.08084	2.36329	0.347151	0.0101799	0.0796894
12.24	313.732	5.15375	4.13972	0.476631	0.0177202	0.131911
12.26	315.233	6.33977	4.66542	0.899157	0.0275019	0.184455
12.28	317.022	5.76645	4.57663	0.575345	0.0183233	0.129236
12.3	317.741	3.5244	3.07648	0.151952	0.00612602	0.0695077
12.32	318.35	3.38918	2.92028	0.166963	0.0097211	0.0824334
12.34	319.032	3.54816	3.13304	0.127409	0.00718431	0.0775842
12.36	319.712	2.98958	2.60695	0.118888	0.00783648	0.0759569
12.38	320.151	2.40054	2.12692	0.0796873	0.00522413	0.0519591
12.4	320.621	3.88186	3.45177	0.123248	0.0077421	0.0742263
12.42	321.611	4.8159	4.28246	0.153737	0.00966352	0.0873617
12.44	322.322	2.88266	2.55559	0.10415	0.00604181	0.0483776
12.46	322.665	2.13074	1.84197	0.104954	0.00485773	0.0383896
12.48	323.146	2.63274	2.20273	0.168251	0.00894587	0.0772762
12.5	323.722	2.85065	2.33035	0.24652	0.00794595	0.0591384
12.52	324.303	2.57442	1.91287	0.376266	0.00812917	0.0522035
12.54	324.885	2.32555	1.76086	0.307511	0.00655851	0.0551977
12.56	325.451	2.62878	2.09978	0.23354	0.0098051	0.0807035
12.58	326.035	3.5877	3.13398	0.14948	0.00903871	0.0762286
12.6	326.84	4.07206	3.51936	0.182517	0.010773	0.0971446
12.62	327.655	4.30579	3.75701	0.17494	0.0102529	0.0918716
12.64	328.469	3.42922	2.68551	0.37367	0.0102695	0.0867275
12.66	329.13	2.81085	2.30027	0.224512	0.00831669	0.0672637
12.68	329.58	2.89404	2.41843	0.182913	0.00964465	0.0792136
12.7	330.31	3.93191	2.97848	0.456606	0.017375	0.135227
12.72	331.314	3.74311	2.69801	0.56324	0.0157706	0.0978541
12.74	331.993	3.01397	2.278	0.382077	0.0099472	0.0823038
12.76	332.632	2.03888	1.65485	0.170269	0.00661503	0.0600909
12.78	333.303	3.55835	2.90086	0.267607	0.0138815	0.116325
12.8	334.32	5.55974	4.69456	0.320546	0.0180423	0.147815
12.82	335.52	4.17192	2.86446	0.742053	0.0216233	0.121307
12.84	336.353	2.97985	2.16388	0.353488	0.0211922	0.14315
12.86	336.964	3.65058	3.01035	0.264639	0.0107684	0.0902301
12.88	337.8	4.1531	3.28179	0.400711	0.0156653	0.125089
12.9	338.619	3.84292	3.22662	0.230941	0.0124977	0.106544
12.92	339.305	3.17754	2.30063	0.449733	0.0140123	0.0985884
12.94	339.996	3.24747	2.54648	0.321111	0.0127459	0.103041
12.96	340.619	3.10982	2.57123	0.220191	0.010622	0.0894172
12.98	341.185	3.7014	3.11324	0.231231	0.0109579	0.0939147
13	342.011	3.61459	2.96524	0.280617	0.0105952	0.0989041
13.02	342.584	2.34125	1.7595	0.30126	0.00855335	0.0729728
13.04	342.985	2.03146	1.56665	0.230611	0.00633427	0.0578979
13.06	343.382	1.87341	1.57408	0.115865	0.00598903	0.0484076
13.08	343.685	1.56802	1.25342	0.139144	0.00580675	0.0429323
13.1	343.982	1.2239	0.959134	0.129789	0.0038849	0.0329193
13.12	344.198	1.06363	0.846412	0.0960436	0.00356663	0.0293837
13.14	344.426	2.00914	1.65048	0.148216	0.00688945	0.0621484
13.16	344.957	2.73207	2.20692	0.232258	0.00972876	0.0741839
13.18	345.491	2.35286	1.74642	0.307719	0.0103011	0.0740664
13.2	345.932	1.9635	1.57967	0.16874	0.0075127	0.0603282
13.22	346.253	2.05938	1.46892	0.316237	0.00963245	0.0651164
13.24	346.812	3.53514	2.72608	0.392085	0.0141433	0.105744
13.26	347.669	4.39016	3.75167	0.224052	0.0157941	0.117426
13.28	348.525	3.31059	2.79913	0.180995	0.0112804	0.0986128
13.3	349.005	2.36531	1.92747	0.183348	0.007582	0.0643301
13.32	349.453	2.36575	1.80312	0.268493	0.00961566	0.074574
13.34	349.997	2.88323	2.08381	0.422795	0.0124742	0.0828957
13.36	350.767	3.76673	2.71166	0.606079	0.0117756	0.0679635
13.38	351.614	4.09049	3.19935	0.463162	0.0109106	0.0854705
13.4	352.519	5.2248	4.19089	0.475131	0.018015	0.145107
13.42	353.685	6.26788	5.11501	0.486048	0.0219401	0.194291
13.44	354.973	5.30944	4.36183	0.411008	0.0164848	0.139839
13.46	355.66	3.68052	3.00587	0.298446	0.0107632	0.0979766
13.48	356.36	4.41991	3.72682	0.255615	0.0145947	0.122398
13.5	357.402	4.52935	3.29375	0.6657	0.0165945	0.107657
13.52	358.38	3.77932	3.01106	0.351722	0.0124328	0.114215
13.54	358.955	2.38645	1.93147	0.213294	0.00584487	0.0549641
13.56	359.344	1.90344	1.43765	0.248479	0.00630862	0.0507174
13.58	359.82	2.1991	1.67146	0.257457	0.00887382	0.0700611
13.6	360.299	2.26235	1.70557	0.264268	0.0104651	0.0747716
13.62	360.785	3.17997	2.22093	0.511128	0.016988	0.10168
13.64	361.825	7.17285	6.18129	0.315531	0.0213284	0.210648
13.66	363.364	8.10719	6.59257	0.627705	0.0242115	0.255325
13.68	364.73	7.24388	6.06379	0.426299	0.0261024	0.223026
13.7	366.039	7.23233	5.96758	0.50601	0.0240296	0.224312
13.72	367.252	6.44931	5.18129	0.52265	0.0250358	0.224815
13.74	368.376	4.58633	3.67491	0.416113	0.018325	0.123946
13.76	369.054	3.68867	2.89204	0.375113	0.0137959	0.114086
13.78	369.863	4.52651	3.70746	0.335101	0.0157655	0.131109
13.8	370.787	3.68273	2.65865	0.562157	0.0170081	0.096939
13.82	371.434	1.76832	0.854507	0.636724	0.00565425	0.0185596
13.84	371.828	1.17906	0.65827	0.253506	0.0128113	0.0831843
13.86	372.123	1.08226	0.564704	0.347991	0.00474835	0.0126442
13.88	372.374	1.22321	0.973686	0.105329	0.00493706	0.039941
13.9	372.596	1.97026	1.49507	0.249168	0.00596626	0.0463393
13.92	373.134	3.37283	2.89415	0.157889	0.00954005	0.0937057
13.94	373.796	4.05418	3.29049	0.286091	0.0187348	0.158549
13.96	374.651	3.95509	3.04092	0.38229	0.0200928	0.161688
13.98	375.313	3.23493	2.58231	0.266529	0.0133481	0.106312
14	375.84	2.72156	1.67031	0.678905	0.0102209	0.0285645
14.02	376.492	2.14243	1.15615	0.637442	0.0120591	0.0330825
14.04	376.953	1.62858	1.05027	0.34986	0.00694133	0.0280827
14.06	377.191	1.36219	0.905858	0.273569	0.00479339	0.018921
14.08	377.487	2.2067	1.34542	0.560355	0.00890954	0.0240218
14.1	378.126	3.77895	3.16453	0.226637	0.0121356	0.106627
14.12	378.844	4.24836	3.25006	0.476421	0.0151733	0.13972
14.14	379.674	5.04475	3.61501	0.759126	0.0247848	0.132831
14.16	380.7	5.38581	4.54354	0.305208	0.0168538	0.14296
14.18	381.616	3.94747	3.19679	0.29722	0.0173316	0.138042
14.2	382.191	2.84074	2.24455	0.269839	0.0119456	0.0913536
14.22	382.755	3.24212	2.65888	0.23492	0.0124801	0.0985387
14.24	383.409	3.69213	3.03628	0.272784	0.0103751	0.101552
14.26	384.139	3.66885	3.04121	0.244043	0.0124629	0.111572
14.28	384.723	2.35688	2.01735	0.119095	0.00705254	0.0589485
14.3	384.96	1.56081	1.33241	0.0754089	0.00490607	0.0430967
14.32	385.273	2.16322	1.84195	0.124251	0.0058013	0.0473934
14.34	385.691	2.48366	2.1478	0.0982325	0.00951916	0.0722491
14.36	386.135	2.58544	2.18928	0.118431	0.0116575	0.0933587
14.38	386.606	2.26478	1.86421	0.152698	0.00932312	0.0758297
14.4	386.971	1.95014	1.63737	0.0959459	0.00821758	0.0688658
14.42	387.262	1.60357	1.35851	0.081878	0.00559945	0.0486496
14.44	387.526	1.44293	1.15944	0.107527	0.00834757	0.0588317
14.46	387.781	1.99597	1.62964	0.130229	0.0102631	0.0803064
14.48	388.235	2.79865	2.36908	0.152517	0.00818793	0.0818398
14.5	388.728	2.49659	2.02034	0.187234	0.0112693	0.0903659
14.52	389.144	2.31181	1.91356	0.150886	0.00904125	0.0653588
14.54	389.524	1.44641	1.16682	0.121041	0.00458998	0.042819
14.56	389.664	0.716884	0.553234	0.0781107	0.00281492	0.0236125
14.58	389.803	0.794894	0.591856	0.107482	0.00321528	0.0182951
14.6	389.968	1.17924	0.952017	0.0950324	0.00486457	0.0399423
14.62	390.223	1.36085	1.07945	0.115837	0.00728548	0.0537112
14.64	390.477	1.38846	1.09365	0.133599	0.00564015	0.04406
14.66	390.736	1.39066	1.06792	0.164573	0.00472512	0.0331351
14.68	390.999	1.42929	1.09539	0.17552	0.00464551	0.0320234
14.7	391.262	1.20714	0.867256	0.181988	0.00609138	0.0337901
14.72	391.472	1.09652	0.911138	0.0781605	0.00364268	0.0254204
14.74	391.66	1.08182	0.90372	0.0635192	0.00407193	0.0353804
14.76	391.848	1.04628	0.795933	0.125828	0.00457921	0.034638
14.78	392.06	1.20929	0.98425	0.110957	0.00485524	0.0396329
14.8	392.287	1.32165	1.10579	0.105131	0.00509813	0.0430833
14.82	392.514	1.19677	0.999209	0.0963269	0.00462528	0.0389569
14.84	392.746	1.23692	1.03051	0.100747	0.00478976	0.0402051
14.86	393.003	1.80562	1.50073	0.148989	0.00700704	0.0585957
14.88	393.412	2.30851	1.9114	0.1944	0.0089893	0.0747222
14.9	393.9	2.78588	2.29615	0.240232	0.0108923	0.089896
14.92	394.388	2.6002	2.13331	0.229476	0.0102076	0.0836452
14.94	394.782	1.64595	1.34539	0.147951	0.0064826	0.0528157
14.96	394.963	1.05859	0.863807	0.0959487	0.0041755	0.0339292
14.98	395.148	1.50086	1.22255	0.137181	0.00592895	0.0480477
15	395.498	2.14419	1.7408	0.199091	0.00849475	0.06849
15.02	395.879	2.37631	1.92224	0.224402	0.00944379	0.0757188
15.04	396.304	2.60446	2.09825	0.250528	0.0103864	0.0827628
15.06	396.779	2.93299	2.35216	0.287911	0.0117419	0.0929177
15.08	397.255	2.75892	2.20242	0.276262	0.0110877	0.087135
15.1	397.731	2.81588	2.23754	0.287515	0.0113601	0.0886602
15.12	398.208	2.81665	2.22777	0.293167	0.011407	0.08841
15.14	398.687	2.86719	2.25713	0.304114	0.0116562	0.0897157
15.16	399.19	2.84682	2.23003	0.30789	0.01162	0.0887858
15.18	399.687	2.58645	2.01613	0.285061	0.010599	0.0804024
15.2	400.102	2.26601	1.75909	0.253638	0.00931642	0.0702494
15.22	400.481	2.13282	1.64945	0.242081	0.00879512	0.0659552
15.24	400.814	1.74249	1.3431	0.200181	0.00720435	0.053766
15.26	401.113	2.45645	1.88773	0.285247	0.0101801	0.0756458
15.28	401.674	3.00116	2.39062	0.272604	0.011749	0.0917713
15.3	402.332	3.10504	2.68518	0.147333	0.00788067	0.0678716
15.32	402.756	2.11494	1.75469	0.132592	0.00563477	0.0755184
15.34	403.1	5.10014	4.41792	0.237492	0.0112846	0.114292
15.36	404.578	5.12083	4.15506	0.450732	0.0137726	0.115602
15.38	404.942	1.88731	1.471	0.21167	0.00568245	0.0443009
15.4	405.283	1.78656	1.3215	0.262413	0.00577358	0.0318052
15.42	405.632	2.50692	1.81044	0.405684	0.00890721	0.0423413
15.44	406.225	2.61415	1.88754	0.379391	0.0123165	0.0748238
15.46	406.63	2.06561	1.61045	0.206423	0.00923803	0.0700025
15.48	406.95	2.26488	1.86486	0.163438	0.00848004	0.0622882
15.5	407.383	2.52781	2.0279	0.227866	0.0083143	0.0687532
15.52	407.848	2.59766	2.09743	0.224319	0.00827773	0.072746
15.54	408.286	2.72228	2.27823	0.162676	0.00853163	0.0897109
15.56	408.761	3.09923	2.48901	0.264704	0.0108561	0.106093
15.58	409.318	2.19445	1.74946	0.198849	0.00926667	0.061595
15.6	409.505	5.76151	4.56914	0.535119	0.0212436	0.165737
15.62	411.271	6.86981	5.43369	0.674199	0.0239951	0.201735
15.64	412.006	3.38884	2.5565	0.427908	0.012574	0.101924
15.66	412.547	2.86149	2.19021	0.33957	0.00998791	0.0823358
15.68	413.046	2.81156	2.08816	0.35524	0.0130435	0.113172
15.7	413.542	3.22573	2.09825	0.570631	0.0242516	0.17404
15.72	414.285	5.41742	4.17463	0.665047	0.0147275	0.0933163
15.74	415.323	4.68874	3.6919	0.445821	0.0185334	0.165597
15.76	415.907	3.35915	2.57828	0.380554	0.0136617	0.107651
15.78	416.584	2.63913	1.9786	0.339191	0.00978284	0.0841317
15.8	416.877	0.908603	0.683925	0.116775	0.00351785	0.0258627
15.82	416.918	0.19269	0.146247	0.022885	0.000776685	0.00683987
15.84	416.948	0.157249	0.111977	0.0255355	0.000642652	0.00410879
15.86	416.977	0.168221	0.110472	0.0350992	0.000662919	0.00411985
15.88	417.008	0.456575	0.338443	0.0608467	0.00165949	0.0162543
15.9	417.154	1.28025	0.937715	0.183455	0.00527699	0.035259
15.92	417.51	1.91414	1.34723	0.328328	0.00740944	0.042471
15.94	417.879	1.74203	1.02212	0.47372	0.00549921	0.0302885
15.96	418.233	2.38691	1.78383	0.311726	0.00973943	0.07607
15.98	418.787	3.4738	2.75452	0.315213	0.0104818	0.139347
16	419.476	2.98022	2.23523	0.379628	0.00935848	0.104883
16.02	420.006	2.53226	1.80937	0.407389	0.0098962	0.0635932
16.04	420.441	2.05014	1.42763	0.365428	0.00903354	0.0445279
16.06	420.841	2.23993	1.48333	0.454881	0.0113413	0.0453739
16.08	421.304	1.84114	1.21515	0.335877	0.0120063	0.0726389
16.1	421.618	1.57234	1.18753	0.192326	0.00748063	0.0428804
16.12	421.9	1.36023	0.817617	0.347315	0.00530979	0.0162121
16.14	422.182	1.4254	0.977353	0.269603	0.0048218	0.0285355
16.16	422.465	1.50036	1.11165	0.2143	0.00511229	0.0282256
16.18	422.747	1.46198	1.03928	0.247016	0.00485955	0.0255586
16.2	423.029	1.18264	0.824168	0.214263	0.0040561	0.0220284
16.22	423.223	1.10958	0.806803	0.173536	0.00359733	0.0227675
16.24	423.46	1.35673	1.03368	0.167188	0.00444696	0.0363889
16.26	423.751	1.57164	1.11405	0.271431	0.00519657	0.0261546
16.28	424.059	1.30973	0.882643	0.2601	0.00487517	0.0220045
16.3	424.34	1.24071	0.832274	0.256384	0.00534599	0.0149626
16.32	424.604	1.66578	1.31053	0.163893	0.00780793	0.0531989
16.34	425.004	2.1726	1.65963	0.24202	0.00920695	0.0794292
16.36	425.475	3.21316	2.41302	0.364529	0.0186091	0.131393
16.38	426.297	3.66286	2.80252	0.426884	0.0153992	0.102362
16.4	426.937	2.75775	2.02095	0.40194	0.0120065	0.0679324
16.42	427.451	3.00168	2.32948	0.312761	0.0148285	0.0918228
16.44	428.021	2.71449	1.92586	0.440943	0.00998084	0.0650888
16.46	428.451	4.78798	3.80144	0.403796	0.0202282	0.182203
16.48	429.663	4.2734	3.3018	0.454713	0.0153109	0.142756
16.5	430.023	2.56803	1.9261	0.319644	0.0110862	0.0844069
16.52	430.624	3.36987	2.40172	0.523974	0.0173343	0.0891834
16.54	431.278	3.44005	2.58778	0.40456	0.0138657	0.111486
16.56	431.866	3.42759	2.27959	0.678878	0.0108785	0.09888
16.58	432.507	3.32733	2.32608	0.569341	0.0136821	0.0748255
16.6	433.13	3.18955	2.27978	0.437462	0.0185551	0.135871
16.62	433.699	2.58815	2.03337	0.257122	0.00881984	0.0727637
16.64	434.021	1.65221	1.23392	0.217241	0.00612816	0.0455339
16.66	434.299	3.56162	2.71298	0.416785	0.0122467	0.107473
16.68	435.293	3.39623	2.5279	0.434741	0.0124104	0.106268
16.7	435.58	1.5815	1.21207	0.174988	0.00660847	0.0505491
