# Supplementary material for: Variations in the Biological Pump through the Miocene: Evidence from organic carbon burial in Pacific Ocean sediments
Source: Copernicus journal article supplement (doi:10.5194/cp-2024-34), 2024-05-27
Supplement: Supplementary file 11 [file SuppTable_S15_806B_Strat_data.xlsx]

## Sheet: SuppTable_S15_806_Strat_data
Site	Hole	Depth (m mbsf)	Age (Ma)	Control point	Foraminifera datum	Nannofossil datum
806	B	0	0	top	top	top
806	B	36.06	1.88	LO	Globigerinoides fistulosus
806	B	40.25	1.93	LO		D. brouweri
806	A	41.05	2.16	OA		D. triradiatus
806	B	51.98	1.93	FO	Globorotalia truncatulinoides
806	B	69.04	3.13	LO	Dentoglobigerina altispira
806	B	72.04	3.33	FO	Globigerinoides fistulosus
806	B	75.53	3.16	LO	Sphaeroidinellopsis
806	B	75.54	3.35	FO	Globorotalia tosaensis
806	B	78.54	3.85	LO	Globorotalia margaritae
806	B	95	3.82	LO		R. pseudoumbilica
806	B	102.55	4.08	(change in)	Pulleniatina
806	B	109.4	4.21	LO	Pulleniatina spectabilis
806	B	111.9	4.37	LO	Globigerina nepenthes
806	B	135.54	4.61	LO	Globorotalia cibaoensis
806	B	167.05	5.91	LO	Globoquadrina dehiscens
806	B	172.04	5.72	FO	Globorotalia tumida
806	B	206.15	6.57	FO	Pulleniatina
806	B	296.75	8.58	FO	Globorotalia plesiotumida
806	B	334.55	9.61	LO		D.hamatus
806	B	354.68	9.89	FO	Neogloboquadrina acostaensis
806	B	364.37	10.54	LO	Paragloborotalia mayeri
806	B	378	11.67	FO	Globigerina nepenthes
806	B	411.29	11.93	LO	Globorotalia fohsi
806	B	449.89	13.4	FO	Globorotalia fohsi
806	B	477.95	13.6	LO		S. heteromorphus
806	B	483.51	13.77	FO	Globorotalia praefohsi
806	B	500.37	14.06	FO	Globorotalia peripheroacuta
806	B	558.21	16.39	FO	Praeorbulina sicana
806	B	575.16	17.54	LO	Catapsydrax dissimilis
806	B	580.33	17.59	FO	Globigerinatella insueta
806	B	603.45	19.01	FO		S. belemnos
806	B	642.67	21.12	LO	Paragloborotalia kugleri
806	B	728.87	22.5	FO	Globoquadrina dehiscens
806	B	737.75	22.96	FO	Paragloborotalia kugleri
