# Supplementary material for: Variations in the Biological Pump through the Miocene: Evidence from organic carbon burial in Pacific Ocean sediments
Source: Copernicus journal article supplement (doi:10.5194/cp-2024-34), 2024-05-27
Supplement: Supplementary file 13 [file SuppTable_S16_806B_agemodel.xlsx]

## Sheet: SuppTable_S16_U806_agemodel
Hole 806B Depth (mbsf)	Hole 806B Age (Ma)	Hole 806B Sedimentation rate (cm/kyr)
0.046647	0.046647	2.3679
2.77866	0.162024	2.36103
5.49482	0.277401	2.3413
8.18131	0.392778	2.31138
10.8284	0.508155	2.27464
13.4301	0.623532	2.23402
15.9835	0.738909	2.19211
18.4885	0.854286	2.15113
20.9473	0.969663	2.11297
23.3643	1.08504	2.07923
25.7453	1.20042	2.05122
28.0976	1.31579	2.03001
30.4296	1.43117	2.01642
32.7505	1.54655	2.01107
35.0702	1.66193	2.01438
37.3988	1.7773	2.02661
39.7467	1.89268	2.04785
42.1243	2.00806	2.07804
44.5419	2.12343	2.11703
47.0094	2.23881	2.16454
49.5366	2.35419	2.22018
52.1326	2.46956	2.28351
54.8059	2.58494	2.354
57.5645	2.70032	2.43107
60.4157	2.81569	2.51408
63.3659	2.93107	2.60238
66.4208	3.04645	2.69526
69.5853	3.16183	2.79201
72.8635	3.2772	2.89191
76.2585	3.39258	2.99422
79.7727	3.50796	3.09822
83.4078	3.62333	3.20318
87.1642	3.73871	3.30841
91.042	3.85409	3.41322
95.0404	3.96947	3.51695
99.1575	4.08484	3.61896
103.391	4.20022	3.71865
107.738	4.3156	3.81546
112.196	4.43097	3.90885
116.758	4.54635	3.99833
121.422	4.66173	4.08345
126.181	4.7771	4.16381
131.03	4.89248	4.23902
135.963	5.00786	4.30879
140.973	5.12324	4.37282
146.053	5.23861	4.43088
151.197	5.35399	4.4828
156.397	5.46937	4.52842
161.647	5.58474	4.56764
166.937	5.70012	4.60042
172.262	5.8155	4.62673
177.614	5.93087	4.6466
182.985	6.04625	4.6601
188.367	6.16163	4.66733
193.755	6.277	4.66841
199.14	6.39238	4.66354
204.516	6.50776	4.6529
209.877	6.62314	4.63673
215.215	6.73851	4.61529
220.526	6.85389	4.58887
225.804	6.96927	4.55777
231.044	7.08464	4.52232
236.24	7.20002	4.48287
241.388	7.3154	4.43978
246.485	7.43077	4.39343
251.526	7.54615	4.3442
256.509	7.66153	4.29248
261.431	7.77691	4.23868
266.29	7.89228	4.18319
271.084	8.00766	4.12643
275.812	8.12304	4.06879
280.473	8.23841	4.01068
285.067	8.35379	3.95248
289.593	8.46917	3.89459
294.054	8.58455	3.83737
298.448	8.69992	3.78119
302.779	8.8153	3.7264
307.047	8.93068	3.67332
311.255	9.04605	3.62228
315.406	9.16143	3.57357
319.501	9.27681	3.52746
323.545	9.39218	3.4842
327.541	9.50756	3.44403
331.493	9.62294	3.40715
335.404	9.73832	3.37373
339.278	9.85369	3.34393
343.12	9.96907	3.31787
346.934	10.0844	3.29564
350.725	10.1998	3.27732
354.496	10.3152	3.26295
358.254	10.4306	3.25252
362.002	10.546	3.24603
365.744	10.6613	3.24343
369.486	10.7767	3.24462
373.231	10.8921	3.24952
376.984	11.0075	3.25799
380.749	11.1228	3.26986
384.53	11.2382	3.28495
388.33	11.3536	3.30304
392.152	11.469	3.32389
396	11.5843	3.34725
399.876	11.6997	3.37283
403.782	11.8151	3.40032
407.722	11.9305	3.42939
411.696	12.0459	3.45972
415.705	12.1612	3.49093
419.751	12.2766	3.52267
423.834	12.392	3.55454
427.954	12.5074	3.58615
432.109	12.6227	3.6171
436.3	12.7381	3.64699
440.525	12.8535	3.6754
444.781	12.9689	3.70193
449.067	13.0842	3.72617
453.38	13.1996	3.74771
457.715	13.315	3.76616
462.07	13.4304	3.78113
466.44	13.5458	3.79225
470.821	13.6611	3.79915
475.207	13.7765	3.8015
479.593	13.8919	3.79896
483.973	14.0073	3.79125
488.342	14.1226	3.77808
492.691	14.238	3.75921
497.016	14.3534	3.73443
501.309	14.4688	3.70355
505.562	14.5841	3.66641
509.769	14.6995	3.62293
513.922	14.8149	3.57302
518.014	14.9303	3.51665
522.037	15.0457	3.45385
525.984	15.161	3.38467
529.847	15.2764	3.30923
533.62	15.3918	3.22768
537.295	15.5072	3.14023
540.866	15.6225	3.04716
544.327	15.7379	2.94876
547.671	15.8533	2.84541
550.893	15.9687	2.73752
553.988	16.0841	2.62558
556.951	16.1994	2.51011
559.78	16.3148	2.39168
562.47	16.4302	2.27095
565.02	16.5456	2.14858
567.428	16.6609	2.02532
569.694	16.7763	1.90194
571.817	16.8917	1.77928
573.799	17.0071	1.65821
575.643	17.1224	1.53964
577.352	17.2378	1.42451
578.93	17.3532	1.31382
580.384	17.4686	1.20855
581.719	17.584	1.10976
582.945	17.6993	1.01847
584.069	17.8147	0.935748
585.104	17.9301	0.862657
586.06	18.0455	0.800251
586.951	18.1608	0.749573
587.79	18.2762	0.711648
588.593	18.3916	0.687469
589.376	18.507	0.677986
590.157	18.6223	0.684099
590.955	18.7377	0.706646
591.788	18.8531	0.746385
592.677	18.9685	0.803986
593.643	19.0839	0.880015
594.708	19.1992	0.974918
595.893	19.3146	1.08901
597.221	19.43	1.22244
598.713	19.5454	1.3752
600.394	19.6607	1.54708
602.283	19.7761	1.73768
604.404	19.8915	1.94635
606.775	20.0069	2.17219
609.416	20.1222	2.41404
612.345	20.2376	2.6704
615.578	20.353	2.93948
619.128	20.4684	3.21913
623.006	20.5838	3.5068
627.22	20.6991	3.79953
631.774	20.8145	4.09395
636.667	20.9299	4.38617
641.895	21.0453	4.67181
647.448	21.1606	4.94596
653.308	21.276	5.20311
659.454	21.3914	5.43713
665.855	21.5068	5.64126
672.471	21.6221	5.80801
679.257	21.7375	5.92915
686.153	21.8529	5.99569
693.092	21.9683	5.99778
699.993	22.0837	5.92471
706.764	22.199	5.76482
713.296	22.3144	5.50549
719.468	22.4298	5.13305
725.141	22.5452	4.63276
730.158	22.6605	3.9887
734.345	22.7759	3.18378
737.505	22.8913	2.19964
739.42	23.0067	1.66038
