# Supplementary material for: Variations in the Biological Pump through the Miocene: Evidence from organic carbon burial in Pacific Ocean sediments
Source: Copernicus journal article supplement (doi:10.5194/cp-2024-34), 2024-05-27
Supplement: Supplementary file 15 [file SuppTable_S17_806B_Carbon_Data.xlsx]

## Sheet: SuppTable_S17_U806_Carbon_Data
Site	Hole	Core	type	Section	Interval (cm)	Depth (mbsf)	Age (Ma)	C-org (wt %)	Bulk MAR (g/cm2/kyr)	C-org MAR (g/cm2/kyr)
U806	B	1	H	1	121	1.21	0.0957771	0.25	1.82642	0.00456606
U806	B	1	H	2	121	2.71	0.159124	0.11	1.76982	0.0019468
U806	B	1	H	3	118	4.18	0.22155	0.1	1.95206	0.00195206
U806	B	1	H	4	121	5.71	0.286642	0.19	1.89354	0.00359772
U806	B	2	H	1	120	7.7	0.372107	0.16	1.93142	0.00309027
U806	B	2	H	2	120	9.2	0.437178	0.18	1.9052	0.00342936
U806	B	2	H	3	120	10.7	0.502557	0.21	1.90233	0.0039949
U806	B	2	H	4	120	12.2	0.56898	0.16	1.96816	0.00314905
U806	B	2	H	5	121	13.7	0.635726	0.11	1.80023	0.00198025
U806	B	2	H	6	120	15.2	0.703505	0.15	1.88818	0.00283228
U806	B	3	H	1	121	17.21	0.795399	0.21	1.94591	0.00408642
U806	B	3	H	2	121	18.71	0.864679	0.27	1.91794	0.00517844
U806	B	3	H	3	121	20.21	0.935064	0.19	1.9198	0.00364762
U806	B	3	H	4	118	21.68	1.00464	0.1	1.79493	0.00179493
U806	B	3	H	5	121	23.21	1.07768	0.1	1.85915	0.00185915
U806	B	3	H	6	121	24.71	1.15025	0.08	1.83261	0.00146609
U806	B	4	H	1	121	26.71	1.24774	0.19	1.77732	0.0033769
U806	B	4	H	2	121	28.21	1.32136	0.18	1.8276	0.00328969
U806	B	4	H	3	121	29.71	1.39557	0.15	1.80727	0.00271091
U806	B	4	H	4	122	31.22	1.47046	0.19	1.76985	0.00336272
U806	B	4	H	5	122	32.72	1.54503	0.14	1.69783	0.00237696
U806	B	4	H	6	120	34.2	1.61864	0.09	1.82795	0.00164515
U806	B	4	H	7	68	35.18	1.66737	0.17	1.79725	0.00305532
U806	B	5	H	1	121	36.21	1.7184	0.1	1.88853	0.00188853
U806	B	5	H	2	121	37.71	1.79259	0.14	1.75014	0.0024502
U806	B	5	H	3	121	39.21	1.86631	0.08	1.69861	0.00135889
U806	B	5	H	4	121	40.71	1.93943	0.06	1.82074	0.00109245
U806	B	5	H	5	121	42.21	2.01215	0.1	1.80854	0.00180854
U806	B	5	H	6	121	43.71	2.08373	0.2	1.74796	0.00349592
U806	B	6	H	1	121	45.71	2.17805	0.27	2.11665	0.00571496
U806	B	6	H	3	121	48.71	2.31645	0.15	1.9367	0.00290505
U806	B	6	H	4	121	50.16	2.38189	0.15	2.00344	0.00300516
U806	B	6	H	5	121	51.71	2.45078	0.22	2.11619	0.00465562
U806	B	6	H	6	121	53.21	2.51606	0.15	2.2111	0.00331664
U806	B	7	H	5	121	61.21	2.84676	0.14	2.44178	0.00341849
U806	B	8	H	5	121	70.71	3.20141	0.18	2.43757	0.00438763
U806	B	9	H	5	120	80.2	3.52152	0.21	2.90941	0.00610976
U806	B	10	H	5	121	89.71	3.81446	0.11	2.95485	0.00325034
U806	B	11	H	5	121	99.21	4.08627	0.14	3.4793	0.00487101
U806	B	12	H	5	121	108.71	4.34074	0.14	3.73994	0.00523592
U806	B	13	H	5	120	118.2	4.58202	0.08	3.78264	0.00302611
U806	B	14	H	5	121	127.71	4.81348	0.07	4.10265	0.00287185
U806	B	15	H	5	121	137.21	5.03658	0.06	4.46874	0.00268124
U806	B	16	H	5	121	146.71	5.25334	0.08	4.15708	0.00332566
U806	B	17	H	5	121	156.21	5.46521	0.05	4.29318	0.00214659
U806	B	18	H	5	120	165.7	5.67313	0.06	4.769	0.0028614
U806	B	19	H	5	119	175.19	5.87862	0.11	4.60898	0.00506988
U806	B	20	H	5	120	184.7	6.08302	0.35	4.83123	0.0169093
U806	B	21	H	5	120	194.2	6.28655	0.19	4.67935	0.00889076
U806	B	22	H	5	120	203.7	6.49025	0.07	4.78027	0.00334619
U806	B	23	H	5	121	213.21	6.69518	0.12	4.81567	0.00577881
U806	B	24	H	5	121	222.71	6.90162	0.15	4.84834	0.00727251
U806	B	25	H	5	121	232.21	7.11054	0.1	4.81221	0.00481221
U806	B	26	H	5	121	241.71	7.32268	0.05	4.61806	0.00230903
U806	B	27	H	5	121	251.21	7.53892	0.13	4.52835	0.00588685
U806	B	28	H	5	121	260.71	7.76	0.11	4.48723	0.00493595
U806	B	29	H	5	121	270.21	7.98662	0.09	4.10226	0.00369203
U806	B	31	H	5	121	289.21	8.45939	0.04	4.25089	0.00170036
U806	B	32	H	5	121	298.71	8.70689	0.05	3.91311	0.00195656
U806	B	33	H	5	121	308.21	8.96256	0.05	3.85561	0.00192781
U806	B	34	H	5	121	317.71	9.22634	0.04	3.67243	0.00146897
U806	B	35	X	5	121	327.21	9.49799	0.04	3.55786	0.00142314
U806	B	36	X	5	122	336.92	9.78348	0.04	3.76203	0.00150481
U806	B	37	X	5	122	346.62	10.075	0.04	3.22006	0.00128802
U806	B	39	X	5	121	366.01	10.6695	0.04	3.65871	0.00146348
U806	B	40	X	5	111	375.61	10.9652	0.04	3.60526	0.0014421
U806	B	41	X	5	90	385.1	11.2555	0.04	3.74806	0.00149922
U806	B	42	X	5	125	395.15	11.5589	0.12	3.70897	0.00445077
U806	B	43	X	5	123	404.73	11.8429	0.05	3.64225	0.00182113
U806	B	44	X	5	123	414.43	12.1245	0.04	3.94223	0.00157689
U806	B	45	X	5	122	424.12	12.4	0.05	3.96667	0.00198334
U806	B	46	X	5	123	433.73	12.6674	0.04	4.02748	0.00161099
U806	B	48	X	5	122	453.02	13.19	0.04	4.03149	0.0016126
U806	B	49	X	5	121	462.71	13.4473	0.04	4.25054	0.00170022
U806	B	50	X	5	121	470.81	13.6608	0.06	4.34179	0.00260507
U806	B	51	X	5	121	480.51	13.916	0.04	4.52621	0.00181048
U806	B	55	X	5	121	518.81	14.9531	0.03	4.16809	0.00125043
U806	B	57	X	5	121	538.11	15.5335	0.04	3.8065	0.0015226
U806	B	58	X	5	122	547.72	15.8551	0.04	3.62114	0.00144845
U806	B	59	X	5	121	557.41	16.2181	0.03	3.05714	0.000917143
U806	B	60	X	5	57	566.47	16.615	0.03	2.59239	0.000777716
U806	B	61	X	5	121	576.81	17.2012	0.04	1.96419	0.000785675
U806	B	62	X	5	121	586.51	18.1038	0.03	1.43716	0.000431148
U806	B	63	X	5	121	596.21	19.3422	0.05	1.47179	0.000735893
U806	B	65	X	5	121	615.51	20.3506	0.04	4.01512	0.00160605
U806	B	66	X	5	121	625.11	20.6414	0.04	4.77753	0.00191101
U806	B	72	X	1	121	676.71	21.6942	0.04	8.27449	0.0033098
U806	B	73	X	5	121	692.41	21.9569	0.03	8.37629	0.00251289
U806	B	75	X	5	122	711.72	22.2866	0.04	7.72959	0.00309184
U806	B	78	X	1	81	734.21	22.7722	0.08	4.77065	0.00381652
