# Supplementary material for: Variations in the Biological Pump through the Miocene: Evidence from organic carbon burial in Pacific Ocean sediments
Source: Copernicus journal article supplement (doi:10.5194/cp-2024-34), 2024-05-27
Supplement: Supplementary file 17 [file SuppTable_S18_807A_Strat_table.xlsx]

## Sheet: SuppTable_S18_807A_Strat_table
Site	Hole	Biostrat Datum	Upper depth (mbsf)	Lower depth (mbsf)	Datum depth (ave mbsf)	Age (Ma)
807	A		0	0	0	0
807	A	LO P. lacunosa (N)	7.4	16.9	12.15	0.43
807	A	LO G. tosaensis (F)	7.4	16.9	12.15	0.61
807	A	LO C. macintyrei (N)	16.9	26.4	21.65	1.61
807	A	LO G. fistulosus (F)	26.4	35.9	31.15	1.77
807	A	LO D brouweri (N)	26.4	35.9	31.15	1.93
807	A	FO G. truncatulinoides (F)	26.4	35.9	31.15	1.93
807	A	OA D triradiatus (N)	26.4	35.9	31.15	2.16
807	A	LO T. convexa var. aspinosa (D)	16.9	26.4	21.65	2.18
807	A	LO T. davisiana (R)	35.9	45.4	40.65	2.89
807	A	LO D surculus (N)	35.9	45.4	40.65	2.53
807	A	LO S. peregrina (R)	45.4	54.9	50.15	2.9
807	A	LO D tamalis (N)	35.9	45.4	40.65	2.76
807	A	LO G. altispira (F)	54.9	64.4	59.65	3.47
807	A	LO P. fistula (R)	64.4	73.9	69.15	3.96
807	A	LO G. margaritae (F)	64.4	73.9	69.15	3.85
807	A	LO Sphenolithus (N)	64.4	73.9	69.15	3.61
807	A	LO P. doliolum (R)	83.4	92.9	88.15	4.03
807	A	LO R. pseudoumbilica (N)	73.9	83.4	78.65	3.8
807	A	FO A. ypsilon (R)	73.9	83.4	78.65	4.1
807	A	LO S. pentas (R)	73.9	83.4	78.65	3.98
807	A	FO S. tetras (R)	83.4	92.9	88.15	4.26
807	A	LO S. berminghami (R)	92.9	102.4	97.65	5.57
807	A	FO S. penfŒ±s (R)	121.4	130.9	126.15	6.17
807	A	FO N. jouseae (D)	102.4	111.9	107.15	4.92
807	A	LO C. acutus (N)	83.4	92.9	88.15	5.04
807	A	LO S. omnitubus (R)	92.9	102.4	97.65	5.32
807	A	LO D quinqueramus (N)	121.4	130.9	126.15	5.53
807	A	LO S. delmontensis (R)	168.9	178.4	173.65	6.89
807	A	LO S. dehiscens s.l. (F)	130.9	140.4	135.65	5.54
807	A	FO G. tumida (F)	121.4	130.9	126.15	5.57
807	A	LO N. miocenica (D)	102.4	111.9	107.15	6.28
807	A	FO S. omnitubus (R)	197.4	206.9	202.15	8.25
807	A	LO C. caepa (R)	187.9	197.4	192.65	6.6
807	A	LO N. porteri (D)	178.4	187.9	183.15	7.53
807	A	LO D hughesi (R)	206.9	216.4	211.65	8.39
807	A	FO D quinqueramus (N)	235.4	244.9	240.15	8.1
807	A	LO C. yabei (D)	244.9	254.4	249.65	8.44
807	A	FO A. tritubus (R)	225.9	235.4	230.65	8.34
807	A	LO C. nodulifer var. cyclopus (D)	197.4	206.9	202.15	8.58
807	A	FO S. berminghami (R)	264.1	273.8	268.95	8.76
807	A	LO A. ellipticus var. javanica (D)	197.4	206.9	202.15	9.47
807	A	LO D. petterssoni (R}	264.1	273.8	268.95	8.63
807	A	LO S. wolffi (R)	254.4	264.1	259.25	8.95
807	A	LO D hamatus (N)	283.5	292.7	288.1	9.61
807	A	FO D hughesi (R)	283.5	292.7	288.1	8.99
807	A	LO Catinaster spp. (N)	283.5	292.7	288.1	9.62
807	A	LO A. moronensis (D)	312	321.2	316.6	9.77
807	A	FO D neohamatus (N)	292.7	302.3	297.5	10.54
807	A	LO C. japonica (R)	302.3	312	307.15	10.31
807	A	FO N. acostaensis (F)	273.8	283.5	278.65	10.57
807	A	FO C. coalitus (N)	302.3	312	307.15	10.89
807	A	FO G. nepenthes (F)	312	321.2	316.6	11.63
807	A	LO G. fohsi lobata (F)	321.2	330.9	326.05	11.79
807	A	LO C. cornuta (R)	330.9	340.6	335.75	11.86
807	A	LO A. ellipticus var. spiralis (D)	321.2	330.9	326.05	10.59
807	A	LO C. nitescens (N)	340.6	350.2	345.4	12.45
807	A	LO C. lewisianus (D)	330.9	340.6	335.75	12.99
807	A	FO G. fohsi lobata (F)	350.2	359.9	355.05	13.41
807	A	LO C. floridanus (N)	369.7	379.5	374.6	13.33
807	A	LO C. lewisianus (D)	330.9	340.6	335.75	13.01
807	A	LO S. heteromorphus (N)	369.7	379.5	374.6	13.55
807	A	FO G. praefohsi (F)	389.2	396.9	393.05	13.77
807	A	FO A. ellipticus var. spiralis (D)	379.5	389.2	384.35	14.16
807	A	LO G. peripheroronda (F)	389.2	398.9	394.05	13.92
807	A	FO G. peripheroacuta (F)	398.9	408.6	403.75	14.02
807	A	TA D deflandrei (N)	427.8	437.5	432.65	15.8
807	A	FO S. heteromorphus (N)	456.8	466.4	461.6	17.65
807	A	LO S. belemnos (N)	456.8	466.4	461.6	17.94
807	A	FO S. belemnos (N)	476.1	485.8	480.95	19.01
807	A	LO G. kugleri (F)	505.1	514.8	509.95	21.12
807	A	FO G. kugleri (F)	581.9	601.3	591.6	22.96
807	A	LO S. ciperoensis (N)	611	620.6	615.8	24.4
807	A	FO G. pseudokugleri (F)	639.9	649.6	644.75	25.2
807	A	LO S. distentus (N)	678.2	687.8	683	26.8
807	A	LO G. opima (F)	659.2	668.9	664.05	26.9
807	A	LO G. opima (F)	697.5	707.2	702.35	26.9
807	A	FO G. opima (F)	784.2	793.9	789.05	30.8
807	A	LO G. ampliapertura s.s. (F)	793.9	803.6	798.75	30.3
