# Supplementary material for: Variations in the Biological Pump through the Miocene: Evidence from organic carbon burial in Pacific Ocean sediments
Source: Copernicus journal article supplement (doi:10.5194/cp-2024-34), 2024-05-27
Supplement: Supplementary file 19 [file SuppTable_S19_807A_Age_Depth.xlsx]

## Sheet: SuppTable_S19__807A_Age_Depth
Site	Hole	Depth (mbsf)	Age (Ma)	Sedimentation rate (cm/kyr)
807	A	0	0	1.18799
807	A	1.8387	0.154774	1.18809
807	A	3.6777	0.309548	1.18799
807	A	5.5161	0.464322	1.18793
807	A	7.3549	0.619096	1.18802
807	A	9.1936	0.77387	1.18818
807	A	11.0329	0.928644	1.18799
807	A	12.871	1.08342	1.1878
807	A	14.7097	1.23819	1.18954
807	A	16.5532	1.39297	1.19125
807	A	18.3972	1.54774	1.27418
807	A	20.4974	1.70251	1.43613
807	A	22.8427	1.85729	1.59096
807	A	25.4222	2.01206	1.73879
807	A	28.2251	2.16684	1.87981
807	A	31.2411	2.32161	2.01413
807	A	34.4598	2.47638	2.14186
807	A	37.8712	2.63116	2.26324
807	A	41.4656	2.78593	2.37831
807	A	45.2332	2.94071	2.48724
807	A	49.1648	3.09548	2.59023
807	A	53.2512	3.25025	2.68731
807	A	57.4833	3.40503	2.7787
807	A	61.8526	3.5598	2.86456
807	A	66.3505	3.71458	2.94494
807	A	70.9686	3.86935	3.01998
807	A	75.6988	4.02412	3.08989
807	A	80.5333	4.1789	3.15479
807	A	85.4644	4.33367	3.21478
807	A	90.4846	4.48845	3.27003
807	A	95.5867	4.64322	3.32045
807	A	100.763	4.79799	3.36662
807	A	106.008	4.95277	3.40852
807	A	111.314	5.10754	3.44599
807	A	116.675	5.26232	3.47927
807	A	122.084	5.41709	3.50834
807	A	127.535	5.57186	3.53386
807	A	133.023	5.72664	3.55583
807	A	138.542	5.88141	3.57392
807	A	144.086	6.03619	3.58846
807	A	149.65	6.19096	3.59976
807	A	155.229	6.34573	3.60752
807	A	160.817	6.50051	3.61236
807	A	166.411	6.65528	3.61463
807	A	172.006	6.81006	3.61333
807	A	177.596	6.96483	3.60946
807	A	183.179	7.1196	3.603
807	A	188.749	7.27438	3.59395
807	A	194.304	7.42915	3.58264
807	A	199.839	7.58393	3.56875
807	A	205.351	7.7387	3.5526
807	A	210.836	7.89347	3.53419
807	A	216.291	8.04825	3.51416
807	A	221.714	8.20302	3.49219
807	A	227.101	8.3578	3.46828
807	A	232.45	8.51257	3.44308
807	A	237.759	8.66734	3.41595
807	A	243.024	8.82212	3.38687
807	A	248.243	8.97689	3.35683
807	A	253.415	9.13167	3.32582
807	A	258.538	9.28644	3.29319
807	A	263.609	9.44121	3.25959
807	A	268.628	9.59599	3.22535
807	A	273.593	9.75076	3.18981
807	A	278.502	9.90554	3.15331
807	A	283.354	10.0603	3.11616
807	A	288.148	10.2151	3.07836
807	A	292.883	10.3699	3.04024
807	A	297.559	10.5246	3.0018
807	A	302.175	10.6794	2.96271
807	A	306.73	10.8342	2.92297
807	A	311.223	10.989	2.88324
807	A	315.655	11.1437	2.84382
807	A	320.026	11.2985	2.80409
807	A	324.335	11.4533	2.76403
807	A	328.582	11.6081	2.72429
807	A	332.768	11.7628	2.68488
807	A	336.893	11.9176	2.64547
807	A	340.957	12.0724	2.60638
807	A	344.961	12.2271	2.56761
807	A	348.905	12.3819	2.52949
807	A	352.791	12.5367	2.4917
807	A	356.618	12.6915	2.45455
807	A	360.389	12.8462	2.41804
807	A	364.103	13.001	2.38186
807	A	367.762	13.1558	2.34665
807	A	371.367	13.3106	2.3124
807	A	374.92	13.4653	2.27881
807	A	378.421	13.6201	2.24618
807	A	381.873	13.7749	2.21452
807	A	385.276	13.9297	2.18351
807	A	388.632	14.0844	2.15379
807	A	391.943	14.2392	2.12536
807	A	395.211	14.394	2.0979
807	A	398.437	14.5488	2.07141
807	A	401.623	14.7035	2.04621
807	A	404.771	14.8583	2.02263
807	A	407.884	15.0131	2.00001
807	A	410.962	15.1679	1.97837
807	A	414.008	15.3226	1.95834
807	A	417.024	15.4774	1.9396
807	A	420.012	15.6322	1.92248
807	A	422.975	15.7869	1.90665
807	A	425.914	15.9417	1.89211
807	A	428.832	16.0965	1.87951
807	A	431.732	16.2513	1.86788
807	A	434.614	16.406	1.85755
807	A	437.482	16.5608	1.84915
807	A	440.338	16.7156	1.84236
807	A	443.185	16.8704	1.83687
807	A	446.024	17.0251	1.833
807	A	448.859	17.1799	1.83041
807	A	451.69	17.3347	1.82944
807	A	454.522	17.4895	1.83041
807	A	457.356	17.6442	1.83235
807	A	460.194	17.799	1.8359
807	A	463.039	17.9538	1.84139
807	A	465.894	18.1086	1.84818
807	A	468.76	18.2633	1.85625
807	A	471.64	18.4181	1.86595
807	A	474.536	18.5729	1.87725
807	A	477.451	18.7277	1.89018
807	A	480.387	18.8824	1.90407
807	A	483.345	19.0372	1.91957
807	A	486.329	19.192	1.93669
807	A	489.34	19.3468	1.95479
807	A	492.38	19.5015	1.97417
807	A	495.451	19.6563	1.99517
807	A	498.556	19.8111	2.01746
807	A	501.696	19.9658	2.04072
807	A	504.873	20.1206	2.06527
807	A	508.089	20.2754	2.09111
807	A	511.346	20.4302	2.11793
807	A	514.645	20.5849	2.14571
807	A	517.988	20.7397	2.17478
807	A	521.377	20.8945	2.2045
807	A	524.812	21.0493	2.23487
807	A	528.295	21.204	2.26653
807	A	531.828	21.3588	2.29884
807	A	535.411	21.5136	2.33179
807	A	539.046	21.6684	2.36538
807	A	542.733	21.8231	2.39963
807	A	546.474	21.9779	2.43452
807	A	550.269	22.1327	2.46941
807	A	554.118	22.2875	2.50494
807	A	558.023	22.4422	2.5408
807	A	561.983	22.597	2.57666
807	A	565.999	22.7518	2.61284
807	A	570.071	22.9066	2.64902
807	A	574.199	23.0613	2.68488
807	A	578.382	23.2161	2.72042
807	A	582.62	23.3709	2.75628
807	A	586.914	23.5256	2.79149
807	A	591.261	23.6804	2.82606
807	A	595.662	23.8352	2.8603
807	A	600.115	23.99	2.89357
807	A	604.619	24.1447	2.9262
807	A	609.173	24.2995	2.95818
807	A	613.776	24.4543	2.98887
807	A	618.425	24.6091	3.01859
807	A	623.12	24.7638	3.04702
807	A	627.857	24.9186	3.07384
807	A	632.635	25.0734	3.09903
807	A	637.45	25.2282	3.12294
807	A	642.302	25.3829	3.14523
807	A	647.186	25.5377	3.16494
807	A	652.099	25.6925	3.18303
807	A	657.039	25.8473	3.19886
807	A	662.001	26.002	3.2121
807	A	666.982	26.1568	3.22341
807	A	671.979	26.3116	3.23181
807	A	676.986	26.4664	3.23698
807	A	681.999	26.6211	3.23924
807	A	687.013	26.7759	3.23859
807	A	692.024	26.9307	3.23472
807	A	697.026	27.0855	3.22729
807	A	702.014	27.2402	3.2163
807	A	706.982	27.395	3.20144
807	A	711.924	27.5498	3.18238
807	A	716.833	27.7045	3.15912
807	A	721.703	27.8593	3.13199
807	A	726.528	28.0141	3.1
807	A	731.299	28.1689	3.06285
807	A	736.009	28.3236	3.02086
807	A	740.65	28.4784	2.97434
807	A	745.216	28.6332	2.922
807	A	749.695	28.788	2.86418
807	A	754.082	28.9427	2.80086
807	A	758.365	29.0975	2.73076
807	A	762.535	29.2523	2.65516
807	A	766.584	29.4071	2.57311
807	A	770.5	29.5618	2.48427
807	A	774.274	29.7166	2.38864
807	A	777.894	29.8714	2.28559
807	A	781.349	30.0262	2.17543
807	A	784.628	30.1809	2.05784
807	A	787.719	30.3357	1.9325
807	A	790.61	30.4905	1.79875
807	A	793.287	30.6453	1.65693
807	A	795.739	30.8	1.58425
