# Supplementary material for: Variations in the Biological Pump through the Miocene: Evidence from organic carbon burial in Pacific Ocean sediments
Source: Copernicus journal article supplement (doi:10.5194/cp-2024-34), 2024-05-27
Supplement: Supplementary file 21 [file SuppTable_S1_U574_Splice_Intervals.xlsx]

## Sheet: SuppTable_1_U574_Splice_Interva
Site_Top	Hole_Top	Core_Top	Type_Top	Section_Top	Interval_Top	CSF_Top	CCSF_Top	Section_Bottom	Interval_Bottom	CSF_Bottom	CCSF_Bottom	TIE
U574	X	1	H	1	0	0	0	3	139	4.39	4.39	ANCHOR
U574	X	2	H	1	1	4.51	5.11	6	100	13	13.6	TIE
U574	A	2	H	5	130	13.6	13.6	7	6	15.36	15.36	APPEND
U574	A	3	H	1	24	15.74	16.48	5	10	21.6	22.34	TIE
U574	X	3	H	5	52	20.52	22.34	7	38	23.38	25.2	TIE
U574	A	4	H	1	56	24.46	25.2	6	78	32.18	32.92	TIE
U574	X	5	H	1	40	33.4	32.92	5	46	39.46	38.98	TIE
U574	A	5	H	4	70	38.3	39	7	12	42.22	42.92	TIE
U574	X	6	H	1	106	43.56	42.93	5	59	49.09	48.46	TIE
U574	A	6	H	3	48	45.88	48.46	6	87	50.77	53.35	TIE
U574	X	7	H	1	54	52.54	53.36	3	108	56.08	56.9	TIE
U574	A	7	H	3	28	55.18	56.91	7	25	61.15	62.88	TIE
U574	X	8	H	1	16	61.16	62.89	5	8	67.08	68.81	TIE
U574	A	8	H	4	50	66.4	68.81	6	145	70.04	72.76	APPEND
U574	X	9	H	1	7	70.57	72.92	7	38	79.88	82.23	APPEND
U574	X	10	H	1	7	80.07	82.56	7	20	89.2	91.69	APPEND
U574	X	11	H	1	46	89.96	92.78	6	146	98.46	101.28	APPEND
U574	A	12	H	2	6	100.26	101.54	3	128	102.98	104.26	TIE
U574	X	12	H	2	76	100.86	104.27	7	36	107.96	111.37	TIE
U574	A	13	H	1	53	108.73	111.37	3	137	112.57	115.21	TIE
U574	X	13	H	3	9	111.19	115.21	6	133	116.93	120.95	TIE
U574	A	15	H	1	12	118.12	120.95	3	131	122.31	125.14	TIE
U574	X	14	H	2	147	120.57	125.14	4	36	122.46	127.03	APPEND
U574	A	17	H	1	2	127.82	129.9	3	97	131.77	133.85	TIE
U574	X	16	H	1	12	127.72	133.85	2	137	130.47	136.6	TIE
U574	A	18	H	2	65	134.05	136.6	7	46	141.36	143.91	APPEND
U574	A	19	H	1	0	141.47	145.47	6	87	149.77	153.84	TIE
U574	X	20	H	1	51	148.11	153.84	3	63	151.21	156.96	TIE
U574	A	20	H	1	6	150.97	156.96	5	140	158.3	164.3	TIE
U574	X	22	H	1	64	158.14	164.3	3	65	161.15	167.31	TIE
U574	A	21	H	1	50	160.41	167.31	6	85	168.24	175.16	APPEND
U574	A	22	H	1	0	168.4	175.19	5	23	174.63	181.42	TIE
U574	X	25	H	1	87	173.37	181.42	4	49	177.49	185.55	APPEND
U574	X	26	H	1	0	177.5	185.56	2	50	179.5	187.56	TIE
U574	A	23	H	2	10	179.5	187.56	5	47	184.37	192.43	TIE
U574	X	27	H	2	63	184.33	192.43	4	37	187.07	195.17	APPEND
U574	X	28	H	1	0	187.2	195.3	4	49	192.19	200.29	APPEND
U574	X	29	H	1	0	192.2	200.3	4	41	197.11	205.21	APPEND
U574	X	30	H	1	0	197.2	205.31	4	37	202.07	210.11	APPEND
U574	X	31	H	1	0	202.2	210.3	2	85	204.55	212.65	TIE
U574	C	2	H	2	100	206.5	212.65	7	37	213.37	219.52	APPEND
U574	C	3	H	1	0	213.5	219.65	4	72	218.72	224.87	APPEND
U574	C	4	H	1	1	223.01	229.16	3	60	226.6	232.75	APPEND
U574	C	5	H	1	0	232.5	238.65	5	23	238.73	244.88	APPEND
U574	C	6	H	1	5	242.05	248.2	5	35	248.35	254.5	APPEND
U574	C	7	H	1	0	251.5	257.65	7	61	261.11	267.26	APPEND
U574	C	8	H	1	0	261	267.15	4	32	265.82	271.97	APPEND
U574	C	9	H	1	3	270.53	276.68	3	96	274.46	280.61	APPEND
U574	C	10	H	1	0	280	286.15	7	48	289.48	295.63	APPEND
U574	C	11	H	1	3	289.53	295.68	3	147	293.97	300.12	APPEND
U574	C	12	H	1	1	299.01	305.16	7	31	308.31	314.46	APPEND
U574	C	13	H	1	4	308.54	314.69	5	35	314.85	321	APPEND
U574	C	14	H	1	1	318.01	324.16	3	33	321.33	327.48	APPEND
U574	C	15	H	1	4	327.54	333.69	7	29	336.79	342.94	APPEND
U574	C	16	H	1	1	337.01	343.16	4	39	341.89	348.04	APPEND
U574	C	17	H	1	4	346.54	352.69	5	135	353.85	360	APPEND
U574	C	18	H	1	2	356.02	362.17	2	84	358.34	364.49	APPEND
U574	C	19	H	1	4	365.54	371.69	2	109	368.09	374.24	APPEND
U574	C	20	H	1	2	375.02	381.17	1	-34	384.16	390.31	APPEND
U574	C	21	H	1	5	384.55	390.7	5	3	390.53	396.68	APPEND
U574	C	22	H	1	2	394.02	400.17	4	29	398.79	404.94	APPEND
U574	C	23	H	1	5	403.55	409.7	6	125	412.25	418.4	APPEND
U574	C	24	H	1	8	413.08	419.23	5	34	419.34	425.49	APPEND
U574	C	25	H	1	5	422.55	428.7	2	38	424.38	430.53	APPEND
U574	C	26	H	1	3	432.03	438.18	3	79	435.79	441.94	APPEND
U574	C	27	H	1	0	441.5	447.65	4	71	446.71	452.86	APPEND
U574	C	28	H	1	8	451.08	457.23	1	53	451.53	457.68	APPEND
U574	C	29	H	1	0	460.5	466.65	4	16	465.16	471.31	APPEND
U574	C	30	H	1	3	470.03	476.18	4	24	474.74	480.89	APPEND
U574	C	31	H	1	1	479.51	485.66	3	50	483	489.15	APPEND
U574	C	32	H	1	3	489.03	495.18	3	108	493.08	499.23	APPEND
U574	C	33	H	1	1	498.51	504.66	5	149	505.99	512.14	APPEND
U574	C	34	H	1	4	508.04	514.19	2	120	510.7	516.85	APPEND
U574	C	35	H	1	1	517.51	523.66	1	-9	519.91	526.06	APPEND
U574	C	36	H	1	0	520	526.15	1	28	520.28	526.43	APPEND
U574	C	37	H	1	4	525.54	531.69	1	50	526	532.15
