# Supplementary material for: Variations in the Biological Pump through the Miocene: Evidence from organic carbon burial in Pacific Ocean sediments
Source: Copernicus journal article supplement (doi:10.5194/cp-2024-34), 2024-05-27
Supplement: Supplementary file 23 [file SuppTable_S20_807A_Carbon_Data.xlsx]

## Sheet: SuppTable_S20_807A_Carbon_Data
Site	Hole	Core	Type	Section	Interval	Depth (mbsf)	Age (Ma)	C-org (wt %)	Bulk MAR (g/cm2/kyr)	C-org MAR (g/cm2/kyr)
U807	A	1	H	1	124	1.24	0.104378	0.17	0.967458	0.00164468
U807	A	1	H	2	124	2.74	0.230629	0.13	0.912589	0.00118637
U807	A	1	H	3	124	4.24	0.356888	0.08	0.947126	0.000757701
U807	A	1	H	4	124	5.74	0.483168	0.06	1.00498	0.000602987
U807	A	2	H	1	123	8.63	0.726429	0.07	1.01179	0.000708256
U807	A	2	H	2	123	10.13	0.852666	0.07	0.980304	0.000686213
U807	A	2	H	3	123	11.63	0.978922	0.08	1.00011	0.000800092
U807	A	2	H	4	123	13.13	1.10522	0.06	1.01079	0.000606474
U807	A	2	H	5	123	14.63	1.23148	0.08	1.00786	0.000806287
U807	A	3	H	1	123	18.13	1.52531	0.04	1.09191	0.000436765
U807	A	3	H	2	123	19.63	1.63859	0.09	1.0967	0.000987027
U807	A	3	H	3	123	21.13	1.74426	0.09	1.32195	0.00118976
U807	A	3	H	5	123	24.13	1.93453	0.06	1.48513	0.000891076
U807	A	3	H	6	123	25.63	2.02354	0.05	1.47345	0.000736726
U807	A	4	H	1	123	27.63	2.13398	0.06	1.58355	0.000950129
U807	A	4	H	2	123	29.13	2.21327	0.06	1.66724	0.00100035
U807	A	4	H	3	123	30.63	2.29025	0.06	1.564	0.0009384
U807	A	4	H	4	123	32.13	2.36435	0.05	1.66046	0.000830228
U807	A	4	H	5	123	33.63	2.43648	0.1	1.7957	0.0017957
U807	A	4	H	6	123	35.13	2.50679	0.04	1.83711	0.000734842
U807	A	5	H	1	123	37.13	2.59753	0.02	1.83435	0.00036687
U807	A	5	H	2	123	38.63	2.66383	0.07	1.96872	0.0013781
U807	A	5	H	3	123	40.13	2.72842	0.09	2.07092	0.00186382
U807	A	5	H	4	123	41.63	2.79269	0.17	2.04812	0.0034818
U807	A	5	H	5	123	43.13	2.85431	0.07	2.03399	0.00142379
U807	A	5	H	6	123	44.63	2.91593	0.05	1.98585	0.000992926
U807	A	6	H	1	124	46.64	2.99609	0.07	2.08268	0.00145787
U807	A	6	H	2	124	48.14	3.05514	0.06	2.15007	0.00129004
U807	A	6	H	3	124	49.64	3.11348	0.11	2.28272	0.00251099
U807	A	11	H	5	123	100.1	4.77817	0.05	2.95449	0.00147724
U807	A	12	H	5	123	109.6	5.05755	0.06	3.13437	0.00188062
U807	A	13	H	5	123	119.1	5.33171	0.05	3.26776	0.00163388
U807	A	14	H	5	123	128.6	5.6019	0.05	3.3544	0.0016772
U807	A	15	H	4	123	135.4	5.7933	0.08	3.20286	0.00256228
U807	A	16	H	5	123	147.6	6.13394	0.07	3.61482	0.00253037
U807	A	17	H	5	123	157.1	6.39756	0.05	3.71225	0.00185612
U807	A	18	H	5	123	166.6	6.66051	0.07	3.54502	0.00248151
U807	A	19	H	5	123	176.1	6.92341	0.1	3.64616	0.00364616
U807	A	20	H	5	123	185.6	7.18688	0.05	3.81155	0.00190577
U807	A	21	H	5	123	195.1	7.45141	0.04	3.60013	0.00144005
U807	A	22	H	5	123	204.6	7.71761	0.05	3.7346	0.0018673
U807	A	23	H	5	123	214.1	7.98608	0.04	3.9311	0.00157244
U807	A	24	H	5	123	223.6	8.25721	0.04	3.54329	0.00141731
U807	A	25	H	5	123	233.1	8.53152	0.04	3.50466	0.00140187
U807	A	26	H	5	123	242.6	8.80965	0.05	3.30097	0.00165048
U807	A	27	H	5	123	252.1	9.09231	0.04	3.34353	0.00133741
U807	A	28	H	5	123	261.6	9.3799	0.04	3.14367	0.00125747
U807	A	29	X	5	123	271.3	9.67928	0.04	3.38584	0.00135434
U807	A	30	X	5	123	281	9.98522	0.05	3.05737	0.00152869
U807	A	31	X	5	123	290.7	10.2985	0.03	3.03405	0.000910214
U807	A	32	X	5	123	299.9	10.6031	0.05	3.18345	0.00159173
U807	A	33	X	5	123	309.5	10.9296	0.04	3.21312	0.00128525
U807	A	34	X	5	123	319.2	11.2693	0.04	3.23088	0.00129235
U807	A	35	X	5	123	328.4	11.6014	0.04	2.90644	0.00116258
U807	A	36	X	5	123	338.1	11.9636	0.03	2.95993	0.000887979
U807	A	37	X	5	123	347.8	12.3386	0.04	2.81104	0.00112442
U807	A	38	X	5	123	357.4	12.7236	0.03	2.53125	0.000759374
U807	A	39	X	5	123	367.1	13.1278	0.04	2.48229	0.000992916
U807	A	40	X	5	126	377	13.5573	0.02	2.54753	0.000509505
U807	A	42	X	5	123	396.4	14.451	0.03	2.5259	0.000757771
U807	A	44	X	5	109	415.7	15.4095	0.03	2.54665	0.000763995
U807	A	46	X	5	131	435.1	16.4323	0.02	2.42321	0.000484642
U807	A	48	X	5	123	454.3	17.4773	0.02	2.35644	0.000471289
U807	A	50	X	5	123	473.6	18.5229	0.02	2.42005	0.000484011
U807	A	52	X	5	123	493	19.5328	0.02	2.4294	0.00048588
U807	A	54	X	5	123	512.3	20.4749	0.04	2.45276	0.000981105
U807	A	56	X	5	124	531.2	21.3313	0.03	3.02357	0.00090707
U807	A	58	X	5	123	550.6	22.146	0.02	3.10888	0.000621775
