# Supplementary material for: Variations in the Biological Pump through the Miocene: Evidence from organic carbon burial in Pacific Ocean sediments
Source: Copernicus journal article supplement (doi:10.5194/cp-2024-34), 2024-05-27
Supplement: Supplementary file 25 [file SuppTable_S2_Site574 disturbance table.xlsx]

## Sheet: SuppTable_2_Site574 disturbance
U574A_Disturbance_CoreImage	U574A_Disturbance_TopDepth	U574A_Disturbance_BottomDepth	U574A_Disturbance_Note	U574X_Disturbance_CoreImage	U574X_Disturbance_TopDepth	U574X_Disturbance_BottomDepth	U574X_Disturbance_Note
S2_U574A_02	10.95	13.316	core top disturbance	S2_U574X_01	1.442	1.5	core top disturbance; flow in
S2_U574A_03	15.514	15.71	disturbed	S2_U574X_03	14	18.75	major flowin; 3 secs
S2_U574A_03	21.814	23.85	flow in	S2_U574X_04	23.502	27.15	flow in scs 1-2 and disturbed top of sec 3
S2_U574A_04	32.2	33.046	flow in	S2_U574X_09	73.41	74.16	flow in
S2_U574A_05	33.102	34.206	disturbed core top	S2_U574X_11	89.5	89.95	disturbed core top
S2_U574A_07	51.9	52.7	disturbed core top	S2_U574X_15	122.6	125.4	core disturbance
S2_U574A_07	53.4	53.9	disturbed
S2_U574A_09	70.4	73.7	disturbed core top
S2_U574A_11	89.2	90.7	flow in
