# Supplementary material for: Variations in the Biological Pump through the Miocene: Evidence from organic carbon burial in Pacific Ocean sediments
Source: Copernicus journal article supplement (doi:10.5194/cp-2024-34), 2024-05-27
Supplement: Supplementary file 27 [file SuppTable_S3_574 est CaCO3 and corr age.xlsx]

## Sheet: Table U574 est CaCO3 and corr a
U574S_CORR_CCSF (m depth)	U574S_CORR_CaCO3 %	U574S_CORR_Age_Ma
0.05568		0.00309625
0.05568		0.00309625
0.0671		0.0037313
0.07852		0.00436634
0.08994		0.00500138
0.10136		0.00563643
0.11278		0.00627147
0.1242		0.00690651
0.13562		0.00754155
0.14704		0.00827329
0.15846	53.7474	0.00921137
0.16988	69.8956	0.0102051
0.1813	59.5897	0.0113891
0.19272	57.6888	0.0125645
0.20414	77.0553	0.0136845
0.21556	71.4225	0.0148042
0.22698	75.7209	0.0159147
0.2384	74.3367	0.0170252
0.24982	68.2898	0.0180095
0.26124	75.7145	0.0189869
0.27266	64.9522	0.0199126
0.28408	61.4104	0.0208297
0.2955	51.6555	0.0217467
0.30692	57.6586	0.0226637
0.31834	55.705	0.0235807
0.32976	63.1947	0.0244977
0.34118	55.6988	0.0254148
0.3526	72.8802	0.0263318
0.36402	61.3904	0.0272488
0.37544	63.1836	0.0281658
0.38686	63.1808	0.0290828
0.39828	47.3625	0.0299998
0.4097	61.379	0.0309169
0.42112	55.6771	0.0318339
0.43254	61.3732	0.0327236
0.44396	57.6224	0.0335081
0.45538	40.5614	0.0342925
0.4668	49.5001	0.035077
0.47822	38.1893	0.0358615
0.48964	42.8636	0.0366459
0.50106	61.3561	0.0374304
0.51248	68.2315	0.0382149
0.5239	61.3504	0.0389994
0.53532	40.5357	0.0397838
0.54674	55.643	0.0405683
0.55816	57.5922	0.0413488
0.56958	55.6368	0.0421279
0.581	72.8344	0.0428258
0.59242	64.8768	0.04348
0.60384	61.3304	0.0440525
0.61526	61.3275	0.0445599
0.62668	61.3247	0.0450673
0.6381	55.6182	0.0455747
0.64952	63.117	0.0460821
0.66094	63.1142	0.0465895
0.67236	69.7877	0.0470968
0.68378	74.2505	0.0476042
0.6952	63.1058	0.0481116
0.70662	63.1031	0.048619
0.71804	71.3182	0.0491264
0.72946	63.0975	0.0496338
0.74088	69.773	0.0501412
0.7523	59.4429	0.0514209
0.76372	57.5378	0.0527006
0.77514	66.5293	0.0539803
0.78656	47.2461	0.05526
0.79798	53.5692	0.0565407
0.8094	35.6619	0.0578999
0.82082	45.0235	0.0594079
0.83224	42.756	0.0609443
0.84366	40.4367	0.0626891
0.85508	47.2255	0.0638913
0.8665	59.4134	0.0650011
0.87792	53.5469	0.0661109
0.88934	38.0544	0.0672207
0.90076	38.0506	0.0683304
0.91218	35.6274	0.0694676
0.9236	47.205	0.0710704
0.93502	49.363	0.0728823
0.94644	55.5345	0.0746942
0.95786	47.1947	0.0765061
0.96928	38.0281	0.078318
0.9807	44.9745	0.0801299
0.99212	44.9709	0.0819712
1.00354	51.4533	0.0839176
1.01496	44.9639	0.0859084
1.02638	47.1741	0.0879053
1.0378	42.6915	0.0899527
1.04922	44.9534	0.0933384
1.06064	42.6843	0.0983004
1.07206	30.5777	0.103207
1.08348	44.9429	0.108117
1.0949	35.5661	0.11312
1.10632	40.3524	0.118343
1.11774	40.3487	0.123691
1.12916	40.345	0.129053
1.14058	35.5508	0.13365
1.152	47.1365	0.136978
1.16342	55.4755	0.140115
1.17484	59.334	0.142915
1.18626	62.9863	0.144388
1.19768	55.4662	0.145429
1.2091	71.2161	0.146471
1.22052	61.176	0.147517
1.23194	49.276	0.148573
1.24336	57.4109	0.149641
1.25478	62.9697	0.1507
1.2662	68.0642	0.151747
1.27762	66.4141	0.152784
1.28904	59.3046	0.153806
1.30046	64.7095	0.154823
1.31188	66.4062	0.155846
1.3233	69.6477	0.156887
1.33472	69.6453	0.15793
1.34614	68.0464	0.158976
1.35756	69.6404	0.160022
1.36898	69.6379	0.161063
1.3804	76.8441	0.1621
1.39182	62.9363	0.163138
1.40324	71.1757	0.164198
1.41466	71.1733	0.165367
1.42608	72.6646	0.167027
1.4375	72.6623	0.168861
1.44892	51.3259	0.170099
1.46034		0.170513
1.55568		0.179959
1.5671		0.181203
1.57852	49.1745	0.182445
1.58994	61.0834	0.183679
1.60136	35.3962	0.184904
1.61278	49.1644	0.186124
1.6242	44.7768	0.187429
1.63562	51.2725	0.188987
1.64704	35.3809	0.190596
1.65846	49.151	0.192462
1.66988	30.3686	0.194328
1.6813	27.7848	0.196211
1.69272	30.3607	0.198127
1.70414	25.1451	0.200042
1.71556	11.208	0.201958
1.72698	19.7183	0.203741
1.7384	22.4491	0.205363
1.74982	30.3407	0.206514
1.76124	42.4641	0.207187
1.77266	32.8616	0.208607
1.78408	16.9097	0.210659
1.7955	30.3247	0.212712
1.80692	32.8498	0.214764
1.81834	25.1035	0.216911
1.82976	42.4425	0.219113
1.84118	35.3157	0.222105
1.8526	32.8342	0.225471
1.86402	22.4025	0.228002
1.87544	46.9193	0.230216
1.88686	37.7268	0.232316
1.89828	55.2757	0.234382
1.9097	51.1941	0.236437
1.92112	35.2889	0.238489
1.93254	40.0868	0.240542
1.94396	49.0673	0.242594
1.95538	40.0794	0.244703
1.9668	49.0606	0.246818
1.97822	60.986	0.248123
1.98964	71.0535	0.24939
2.00106	64.5438	0.25047
2.01248	62.7851	0.251548
2.0239	59.1152	0.252616
2.03532	44.6504	0.253672
2.04674	67.8905	0.254686
2.05816	59.1063	0.255693
2.06958	49.0305	0.256682
2.081	44.6363	0.257692
2.09242	44.6328	0.258732
2.10384	40.0317	0.259772
2.11526	30.2128	0.260812
2.12668	32.7402	0.261854
2.1381	32.7363	0.262897
2.14952	42.342	0.263953
2.16094	27.6137	0.265013
2.17236	37.6329	0.26611
2.18378	46.8267	0.267215
2.1952	24.9664	0.268392
2.20662	32.7128	0.269582
2.21804	35.1892	0.271571
2.22946	37.6142	0.273575
2.24088	32.7011	0.275705
2.2523	42.3097	0.276836
2.26372	35.1739	0.277271
2.27514	30.1569	0.278554
2.28656	35.1662	0.280217
2.29798	30.1489	0.282158
2.3094	27.5607	0.284173
2.32082	24.9206	0.286189
2.33224	35.1509	0.288204
2.34366	39.9546	0.290219
2.35508	46.7752	0.292234
2.3665	37.5691	0.294249
2.37792	32.6541	0.296069
2.38934	35.1317	0.297076
2.40076	37.5578	0.298084
2.41218	27.524	0.299091
2.4236	32.6384	0.301294
2.43502	27.5158	0.305323
2.44644	48.9199	0.308382
2.45786	30.093	0.310454
2.46928	46.7409	0.312607
2.4807	37.5316	0.314815
2.49212	30.081	0.317709
2.50354	55.111	0.320901
2.51496	55.1079	0.324013
2.52638	62.6597	0.327105
2.5378	64.4166	0.33029
2.54922	66.1221	0.333486
2.56064	66.1194	0.336359
2.57206	66.1168	0.339233
2.58348	64.4058	0.340901
2.5949	58.9678	0.34257
2.60632	55.083	0.344318
2.61774	57.0467	0.346067
2.62916	42.1911	0.34782
2.64058	46.6894	0.349572
2.652	60.8169	0.351465
2.66342	35.0396	0.353358
2.67484	32.5522	0.355139
2.68626	44.4502	0.35692
2.69768	46.6723	0.358679
2.7091	35.0243	0.360439
2.72052	37.4527	0.362202
2.73194	29.9971	0.363964
2.74336	35.0128	0.365841
2.75478	27.4017	0.367718
2.7662	39.8186	0.369651
2.77762	35.0013	0.371584
2.78904	22.0592	0.373517
2.80046	27.3853	0.375451
2.81188	42.1336	0.377384
2.8233	27.3772	0.379318
2.83472	53.0008	0.381251
2.84614	27.369	0.383184
2.85756	34.9744	0.385117
2.86898	37.4039	0.387051
2.8804	32.4817	0.388974
2.89182	34.9629	0.390897
2.90324	34.9591	0.392813
2.91466	22.0126	0.394729
2.92608	39.7672	0.397073
2.9375	42.094	0.399418
2.94892	24.6919	0.401737
2.96034	29.9171	0.404056
2.97176	39.7525	0.406385
2.98318	42.0797	0.408713
2.9946	52.9561	0.411042
3.00602	72.3462	0.41337
3.01744		0.415355
3.05568		0.422226
3.0671		0.423793
3.07852	72.3315	0.42513
3.08994	80.2776	0.426466
3.10136	79.08	0.427802
3.11278	75.1809	0.429264
3.1242	81.4164	0.433594
3.13562	80.2703	0.437924
3.14704	79.0724	0.439785
3.15846	75.1723	0.440663
3.16988	72.3131	0.441835
3.1813	75.168	0.443466
3.19272	64.2613	0.445131
3.20414	56.8911	0.447312
3.21556	67.63	0.449493
3.22698	70.7951	0.451765
3.2384	62.4858	0.454068
3.24982	64.2477	0.456403
3.26124	73.7496	0.458783
3.27266	62.4774	0.461101
3.28408	41.9849	0.462731
3.2955	52.872	0.464361
3.30692	52.8688	0.465992
3.31834	70.776	0.467622
3.32976	44.2521	0.469242
3.34118	41.9669	0.470848
3.3526	52.856	0.472407
3.36402	34.8043	0.473551
3.37544	32.3119	0.474696
3.38686	32.308	0.47577
3.39828	41.9489	0.476825
3.4097	29.7598	0.477879
3.42112	34.7851	0.478934
3.43254	39.6042	0.479989
3.44396	21.8161	0.48105
3.45538	29.7438	0.482112
3.4668	32.2806	0.483131
3.47822	29.7358	0.484139
3.48964	39.5858	0.48515
3.50106	29.7278	0.486165
3.51248	39.5784	0.487181
3.5239	44.1924	0.488205
3.53532	37.1847	0.489228
3.54674	46.4169	0.490254
3.55816	46.4134	0.491281
3.56958	56.794	0.492303
3.581	65.8845	0.493322
3.59242	60.5804	0.494337
3.60384	73.6827	0.495332
3.61526	62.3936	0.496326
3.62668	76.4386	0.497335
3.6381	76.4365	0.498347
3.64952	83.477	0.499439
3.66094	77.7353	0.500607
3.67236	81.3326	0.501933
3.68378	75.0735	0.503955
3.6952	75.0714	0.505978
3.70662	81.3273	0.508407
3.71804	77.7253	0.510903
3.72946	72.1999	0.5134
3.74088	70.6876	0.515896
3.7523	50.6661	0.518392
3.76372	24.3951	0.520889
3.77514	27.0372	0.523385
3.78656	21.6889	0.525896
3.79798	37.0982	0.528409
3.8094	58.6538	0.530918
3.82082	69.1086	0.533425
3.83224	64.1094	0.535545
3.84366	56.7211	0.53633
3.85508	54.7426	0.537114
3.8665	62.3322	0.537898
3.87792	34.6315	0.538683
3.88934	44.0798	0.539467
3.90076	44.0763	0.540252
3.91218	48.4894	0.542846
3.9236	41.7834	0.551014
3.93502	37.0531	0.559183
3.94644	52.6898	0.56274
3.95786	29.5677	0.565887
3.96928	52.6834	0.569738
3.9807	54.7083	0.574074
3.99212	41.7618	0.578393
4.00354	52.6738	0.582663
4.01496	60.4741	0.586934
4.02638	46.2725	0.591108
4.0378	50.5841	0.595276
4.04922	39.4055	0.599497
4.06064	70.6205	0.603751
4.07206	54.6834	0.608007
4.08348	56.6574	0.612264
4.0949	58.58	0.616522
4.10632	52.6451	0.61919
4.11774	56.6483	0.621791
4.12916	46.2416	0.624391
4.14058	72.1166	0.626372
4.152	76.3433	0.62695
4.16342	67.4181	0.627528
4.17484	78.9006	0.628106
4.18626	80.1021	0.628684
4.19768	70.5918	0.629262
4.2091	88.6066	0.62984
4.22052	83.3976	0.630539
4.23194	90.5115	0.631487
4.24336	87.0735	0.632434
4.25478	91.0424	0.639246
4.2662	86.2285	0.643994
4.27762	88.5999	0.646242
4.28904	88.5988	0.64849
4.30046	89.9217	0.650753
4.31188	87.0659	0.653044
4.3233	87.8559	0.655676
4.33472	91.5184	0.658494
4.34614	89.9179	0.661605
4.35756	91.0353	0.664729
4.36898	76.3039	0.667859
4.3804	89.9151	0.670989
5.15568		0.809442
5.1671		0.811691
5.17852		0.814045
5.18994		0.8164
5.20136		0.818761
5.21278	50.4191	0.821138
5.2242	54.5326	0.823818
5.23562	62.1438	0.82677
5.24704	41.5554	0.830378
5.25846	43.8428	0.83286
5.26988	31.8675	0.834783
5.2813	46.0752	0.836705
5.29272	52.4808	0.839733
5.30414	43.8287	0.843588
5.31556	36.7961	0.847522
5.32698	46.0615	0.85052
5.3384	50.383	0.852492
5.34982	54.4983	0.854465
5.36124	46.0511	0.856437
5.37266	39.1723	0.858409
5.38408	26.6766	0.860382
5.3955	26.6725	0.862354
5.40692	26.6684	0.864326
5.41834	56.4619	0.866068
5.42976	43.7899	0.867706
5.44118	58.3866	0.869256
5.4526	62.0906	0.871397
5.46402	82.2545	0.873861
5.47544	81.1479	0.876283
5.48686	82.2512	0.878705
5.49828	90.9978	0.881127
5.5097	90.4598	0.88428
5.52112	90.9962	0.888531
5.53254	83.2982	0.89079
5.54396	83.2966	0.895298
5.55538	86.9941	0.899806
5.5668	88.5327	0.904314
5.57822	83.2918	0.908822
5.58964	89.2232	0.91105
5.60106	90.9906	0.913767
5.61248	84.2896	0.917424
5.6239	86.9865	0.923221
5.63532	70.416	0.927268
5.64674	60.214	0.935733
5.65816	52.3784	0.943907
5.66958	48.1488	0.9471
5.681		0.950292
5.69242		0.953484
5.70384		0.956677
5.71526		0.959879
5.72668		0.963006
5.7381	58.3096	0.964076
5.74952	67.1972	0.979449
5.76094	58.3037	0.996069
5.77236	71.9073	1.0055
5.78378	68.813	1.01498
5.7952	68.8105	1.02478
5.80662	71.9003	1.03866
5.81804	76.1494	1.05175
5.82946	65.5039	1.06785
5.84088	71.8933	1.08665
5.8523	77.4573	1.09593
5.86372	77.4553	1.10289
5.87514	77.4533	1.11102
5.88656	65.4907	1.12105
5.89798	58.2682	1.12497
5.9094	65.4854	1.12848
5.92082	63.7551	1.132
5.93224	58.2593	1.13644
5.94366	50.209	1.1656
5.95508	68.7757	1.18253
5.9665	68.7733	1.1896
5.97792	68.7708	1.1946
5.98934	63.7388	1.20003
6.00076	67.1409	1.20479
6.01218	60.1218	1.21463
6.0236	78.691	1.22529
6.03502	65.4563	1.23473
6.04644	58.2297	1.24207
6.05786	76.1057	1.25125
6.06928	61.9393	1.25954
6.0807	52.2599	1.26711
6.09212	56.2824	1.27467
6.10354	58.2148	1.28223
6.11496	36.5326	1.2901
6.12638	36.5289	1.29716
6.1378	63.7034	1.32061
6.14922	58.203	1.32463
6.16064	54.2766	1.32834
6.17206	50.1434	1.33263
6.18348	47.9975	1.33613
6.1949	34.0538	1.33961
6.20632	45.7964	1.34542
6.21774	21.0084	1.34897
6.22916	38.8961	1.34983
6.24058	31.534	1.3507
6.252	45.7826	1.35162
6.26342	38.885	1.3527
6.27484	26.3579	1.35393
6.28626	45.7723	1.35543
6.29768	36.4724	1.35702
6.3091	26.3457	1.35867
6.32052	38.8666	1.36044
6.33194	50.0974	1.36238
6.34336	45.755	1.3644
6.35478	43.5045	1.36642
6.3662	45.7481	1.36845
6.37762	41.1986	1.37047
6.38904	41.195	1.3725
6.40046	45.7378	1.37475
6.41188	43.4869	1.37739
6.4233	47.9268	1.37968
6.43472	58.1289	1.38182
6.44614	60.0122	1.38375
6.45756	33.9654	1.38568
6.46898	43.4693	1.38761
6.4804	60.0035	1.38954
6.49182	52.1445	1.39137
6.50324	65.3479	1.39313
6.51466	61.83	1.39493
6.52608	52.1349	1.39671
6.5375	45.6965	1.39848
6.54892	50.0349	1.4002
6.56034	41.1409	1.40209
6.57176		1.40408
6.65568		1.41762
6.6671		1.42279
6.67852	41.1036	1.42601
6.68994	36.343	1.42846
6.70136	31.3756	1.43091
6.71278	33.8794	1.43336
6.7242	28.8082	1.43585
6.73562	38.7326	1.43839
6.74704	47.8314	1.44138
6.75846	43.3799	1.44446
6.76988	33.8602	1.44754
6.7813	28.7882	1.45063
6.79272	33.8525	1.45374
6.80414	23.5053	1.45686
6.81556	20.7861	1.46016
6.82698	36.2978	1.46334
6.8384	33.8371	1.46641
6.84982	36.2903	1.46948
6.86124	41.0459	1.47256
6.87266	28.7561	1.47563
6.88408	26.1399	1.4787
6.8955	41.0351	1.48148
6.90692	38.6773	1.48405
6.91834	38.6736	1.4864
6.92976	45.5781	1.48874
6.94118	33.8024	1.49108
6.9526	38.6625	1.49343
6.96402	43.3164	1.49577
6.97544	45.5643	1.49811
6.98686	56.0438	1.50043
6.99828	49.9056	1.50271
7.0097	47.754	1.50497
7.02112	66.9117	1.50722
7.03254	59.864	1.50915
7.04396	65.2226	1.51109
7.05538	63.4843	1.51303
7.0668	63.4816	1.51497
7.07822	68.5313	1.51667
7.08964	59.8495	1.51764
7.10106	51.9734	1.51861
7.11248	43.2705	1.52041
7.1239	57.9498	1.52228
7.13532	56.0041	1.52471
7.14674	47.7135	1.5273
7.15816	40.9521	1.52883
7.16958	38.5925	1.53036
7.181	59.8264	1.53188
7.19242	45.4988	1.53341
7.20384	40.9377	1.53493
7.21526	45.4919	1.53645
7.22668	55.9797	1.53798
7.2381	38.5703	1.53948
7.24952	43.2282	1.54097
7.26094	45.4781	1.54244
7.27236	43.2211	1.5439
7.28378	38.5556	1.54535
7.2952	49.8201	1.54681
7.30662	38.5482	1.54826
7.31804	63.4216	1.54972
7.32946	43.2035	1.55118
7.34088	43.2	1.55263
7.3523	47.6529	1.55409
7.36372	47.6495	1.55554
7.37514	47.6461	1.557
7.38656	45.4401	1.55845
7.39798	49.7905	1.55991
7.4094	53.9347	1.56134
7.42082	49.7839	1.56292
7.43224	33.637	1.56465
7.44366	36.0943	1.56637
7.45508	43.1647	1.56808
7.4665	33.6254	1.56979
7.47792	47.6158	1.57149
7.48934	40.8474	1.5727
7.50076	43.1506	1.57356
7.51218	40.8402	1.57473
7.5236	31.0928	1.57713
7.53502	25.9069	1.57974
7.54644	47.5956	1.58465
7.55786	31.081	1.58849
7.56928	33.5908	1.59155
7.5807	36.0491	1.59469
7.59212	49.7346	1.59785
7.60354	38.4523	1.601
7.61496	38.4486	1.60415
7.62638	51.8258	1.6073
7.6378	38.4412	1.61044
7.64922	45.3608	1.61359
7.66064	43.1011	1.61674
7.67206	47.5585	1.61989
7.68348	49.7083	1.62304
7.6949	49.705	1.62618
7.70632	49.7017	1.62896
7.71774	63.326	1.63126
7.72916	65.0636	1.6332
7.74058	77.1255	1.63514
7.752	72.9863	1.63646
7.76342	78.3974	1.63777
7.77484	66.742	1.63911
7.78626	68.3769	1.64046
7.79768	72.9773	1.6418
7.8091	71.4923	1.64314
7.82052	66.7318	1.64447
7.83194	68.367	1.64581
7.84336	69.9507	1.64716
7.85478	72.966	1.6485
7.8662	75.7751	1.64984
7.87762	68.357	1.65118
7.88904	63.285	1.65252
7.90046	68.352	1.65388
7.91188	78.3722	1.65553
7.9233	68.347	1.65719
7.93472	61.4807	1.65887
7.94614	71.4643	1.66055
7.95756	69.9266	1.66223
7.96898	71.4596	1.66391
7.9804	69.9218	1.66559
7.99182	66.6931	1.66731
8.00324	77.0792	1.66941
8.01466	63.255	1.67129
8.02608	53.7656	1.67295
8.0375	57.7122	1.67459
8.04892	57.7092	1.6762
8.06034	51.7037	1.67877
8.07176	55.754	1.68231
8.08318	47.4372	1.68496
8.0946	59.5951	1.68673
8.10602	63.2331	1.6885
8.11744		1.69026
8.15568		1.69618
8.1671		1.69795
8.17852	40.6295	1.69972
8.18994	59.571	1.70149
8.20136	53.7175	1.70326
8.21278	45.1905	1.70504
8.2242	55.7132	1.70688
8.23562	51.6544	1.70872
8.24704	53.705	1.71057
8.25846	51.648	1.71243
8.26988	55.701	1.71428
8.2813	51.6416	1.71614
8.29272	57.6457	1.71799
8.30414	53.6893	1.71984
8.31556	55.6888	1.7217
8.32698	42.8951	1.72356
8.3384	59.5333	1.7254
8.34982	47.3584	1.72725
8.36124	45.1456	1.72907
8.37266	30.8005	1.7309
8.38408	38.2	1.73272
8.3955	40.5609	1.73453
8.40692	49.4997	1.73635
8.41834	42.8668	1.73817
8.42976	30.7809	1.73999
8.44118	30.777	1.74181
8.4526	28.2015	1.74363
8.46402	42.8527	1.74545
8.47544	40.5356	1.7473
8.48686	40.532	1.74915
8.49828	40.5284	1.75082
8.5097	47.3112	1.75248
8.52112	45.0972	1.75415
8.53254	68.2139	1.75581
8.54396	57.5803	1.75748
8.55538	72.8277	1.75914
8.5668	75.6466	1.76114
8.57822	61.3221	1.763
8.58964	59.4697	1.7646
8.60106	69.7905	1.76628
8.61248	64.8583	1.76799
8.6239	66.5506	1.76874
8.63532	57.5565	1.7695
8.64674	53.5953	1.77025
8.65816	53.5921	1.7721
8.66958	49.4239	1.77453
8.681	45.0489	1.77983
8.69242	30.6905	1.78441
8.70384	38.0966	1.78772
8.71526	28.1092	1.79131
8.72668	33.2005	1.79503
8.7381	40.4525	1.79913
8.74952	30.6708	1.80323
8.76094	30.6669	1.80732
8.77236	42.7573	1.81141
8.78378	33.1812	1.81551
8.7952	25.4555	1.8196
8.80662	45.0109	1.82374
8.81804	38.0597	1.82792
8.82946	40.4236	1.83239
8.84088	47.2133	1.83693
8.8523	47.21	1.84116
8.86372	44.9936	1.84501
8.87514	35.6216	1.84829
8.88656	30.6236	1.85157
8.89798	33.1427	1.85485
8.9094	25.4146	1.85813
8.92082	44.9763	1.86141
8.93224	42.7078	1.86469
8.94366	42.7043	1.86797
8.95508	40.3838	1.87123
8.9665	51.4487	1.87428
8.97792	42.6937	1.87723
8.98934	47.1695	1.88004
9.00076	44.9522	1.88285
9.01218	42.683	1.88566
9.0236	37.9932	1.88848
9.03502	35.5688	1.89129
9.04644	42.6724	1.8941
9.05786	40.3513	1.89691
9.06928	61.2009	1.89973
9.0807	49.3053	1.90254
9.09212	44.9245	1.90534
9.10354	37.9673	1.90813
9.11496	42.6512	1.91056
9.12638	51.4036	1.91271
9.1378	40.326	1.91361
9.14922	53.4573	1.91501
9.16064	42.6371	1.91698
9.17206	51.3908	1.91789
9.18348	44.8969	1.91854
9.1949	44.8934	1.9192
9.20632	44.89	1.91985
9.21774	61.1643	1.92051
9.22916	42.6159	1.92246
9.24058	49.2592	1.92548
9.252	55.4382	1.93269
9.26342	53.4259	1.93729
9.27484	40.2826	1.93921
9.28626	27.9085	1.94118
9.29768	47.0783	1.9432
9.3091	44.8589	1.94542
9.32052	42.5876	1.94769
9.33194	42.5841	1.94999
9.34336	32.9924	1.95197
9.35478	37.886	1.95384
9.3662	42.5734	1.95552
9.37762	22.5655	1.95718
9.38904	40.2465	1.95883
9.40046	27.8684	1.96141
9.41188	37.8675	1.96322
9.4233	47.0411	1.96474
9.43472	37.8601	1.96572
9.44614	47.0344	1.96706
9.45756	42.5452	1.96871
9.46898	32.95	1.97036
9.4804	44.807	1.972
9.49182	30.4151	1.97365
9.50324	49.1833	1.9753
9.51466	42.5275	1.97695
9.52608	42.5239	1.9786
9.5375	27.8202	1.98024
9.54892	30.3954	1.98189
9.56034	42.5133	1.98354
9.57176	46.9972	1.98519
9.58318	42.5062	1.98634
9.5946	59.2146	1.9874
9.60602	40.1778	1.98831
9.61744		1.989
9.65568		1.991
9.6671		1.99193
9.67852	51.2481	1.99414
9.68994	49.1294	1.9962
9.70136	44.7401	1.99762
9.71278	53.3024	1.99954
9.7242	44.7332	2.00178
9.73562	40.1367	2.00339
9.74704	40.1331	2.00486
9.75846	46.942	2.00609
9.76988	53.2867	2.00732
9.7813	42.4449	2.00854
9.79272	53.2804	2.00977
9.80414	51.2127	2.011
9.81556	46.9251	2.01223
9.82698	53.271	2.01346
9.8384	35.3032	2.01469
9.84982	53.2647	2.01592
9.86124	44.6917	2.01715
9.87266	44.6882	2.01838
9.88408	40.0897	2.01961
9.8955	55.2658	2.02084
9.90692	55.2627	2.02206
9.91834	49.0634	2.02329
9.92976	55.2566	2.02452
9.94118	64.5488	2.02575
9.9526	71.0532	2.02697
9.96402	67.9004	2.02851
9.97544	64.5408	2.03004
9.98686	62.782	2.03157
9.99828	69.4942	2.03311
10.0097	51.1547	2.03464
10.0211	67.8879	2.03611
10.0325	42.3671	2.03757
10.044	59.1004	2.03906
10.0554	55.2229	2.04084
10.0668	46.8508	2.04272
10.0782	51.1354	2.04466
10.0896	40.0246	2.04661
10.1011	49.0106	2.04856
10.1125	57.1711	2.05052
10.1239	49.004	2.05247
10.1353	49.0007	2.05442
10.1467	51.116	2.0554
10.1582	46.8237	2.05638
10.1696	51.1096	2.05768
10.181	51.1064	2.05963
10.1924	42.3175	2.0636
10.2038	42.314	2.06624
10.2153	57.1443	2.06823
10.2267	55.177	2.07022
10.2381	48.971	2.07225
10.2495	44.5741	2.0743
10.2609	53.1516	2.07636
10.2724	55.1647	2.07841
10.2838	59.0395	2.08047
10.2952	55.1586	2.08253
10.3066	53.1391	2.08458
10.318	48.9479	2.08662
10.3295	44.5498	2.08865
10.3409	55.1464	2.09064
10.3523	62.6942	2.09259
10.3637	59.0191	2.09453
10.3751	66.1547	2.09647
10.3866	62.686	2.09903
10.398	62.6832	2.10213
10.4094	59.0075	2.10572
10.4208	59.0046	2.10931
10.4322	62.675	2.11289
10.4437	69.3995	2.11648
10.4551	62.6695	2.12006
10.4665	60.8557	2.12365
10.4779	60.8529	2.12693
10.4893	60.85	2.13005
10.5008	62.6585	2.13317
10.5122	60.8444	2.13624
10.5236	62.653	2.1391
10.535	51.0065	2.14189
10.5464	62.6475	2.14476
10.5579	51	2.14811
10.5693	48.8752	2.15152
10.5807	64.3995	2.15515
10.5921	64.3969	2.15916
10.6035	60.8218	2.16141
10.615	55.0728	2.16368
10.6264	67.755	2.16668
10.6378	66.0952	2.17118
10.6492	62.6228	2.18018
10.6606	64.3809	2.1862
10.6721	55.0575	2.19074
10.6835	70.9029	2.19525
10.6949	57.0189	2.19945
10.7063	50.9582	2.203
10.7177	62.6063	2.20592
10.7292	50.9517	2.2081
10.7406	55.0391	2.20944
10.752	57.004	2.21063
10.7634	55.033	2.21177
10.7748	60.7794	2.21291
10.7863	48.8125	2.21406
10.7977	56.9921	2.2152
10.8091	50.9291	2.21634
10.8205	56.9861	2.21748
10.8319	44.3976	2.2189
10.8434	60.7624	2.22047
10.8548	42.1122	2.22203
10.8662	55.0054	2.22359
10.8776	48.7861	2.22515
10.889	50.9066	2.22671
10.9005	50.9033	2.22828
10.9119	52.9724	2.22984
10.9233	52.9693	2.23139
10.9347	48.7696	2.23295
10.9461	50.8904	2.23451
10.9576	52.9598	2.23615
10.969	58.8651	2.23802
10.9804	62.5431	2.24034
10.9918	62.5404	2.24311
11.0032	60.7229	2.24594
11.0147	44.3421	2.24881
11.0261	52.941	2.25165
11.0375	58.8477	2.25449
11.0489	52.9347	2.25743
11.0603	58.8419	2.26043
11.0718	58.839	2.26312
11.0832	50.8517	2.26579
11.0946	44.3179	2.26907
11.106		2.27339
11.1557		2.29206
11.1671		2.29512
11.1785	46.5216	2.29818
11.1899	48.6957	2.30124
11.2014	58.8059	2.30434
11.2128	56.8835	2.3074
11.2242	65.9622	2.31047
11.2356	48.6825	2.31353
11.247	50.8055	2.31659
11.2585	46.4978	2.31966
11.2699	48.6725	2.32123
11.2813	54.894	2.32222
11.2927	48.6659	2.32376
11.3041	56.8596	2.32665
11.3156	54.8847	2.32984
11.327	50.7829	2.33314
11.3384	46.4742	2.33644
11.3498	65.9337	2.34103
11.3612	54.8725	2.34594
11.3727	60.6313	2.35078
11.3841	76.4794	2.35408
11.3955	72.264	2.35738
11.4069	70.7539	2.36069
11.4183	70.7516	2.36399
11.4298	83.5053	2.3686
11.4412	76.4692	2.37309
11.4526	81.3637	2.37745
11.464	75.1118	2.38181
11.4754	76.4631	2.38618
11.4869	80.2116	2.39058
11.4983	82.4522	2.39495
11.5097	82.4505	2.39931
11.5211	80.2062	2.40325
11.5325	76.4529	2.40629
11.544	76.4509	2.40799
11.5554	75.0949	2.40967
11.5668	65.8844	2.41239
11.5782	70.7186	2.41654
11.5896	72.2253	2.42309
11.6011	69.1531	2.42612
11.6125	70.7115	2.42817
11.6239	64.1556	2.42996
11.6353	62.3854	2.43153
11.6467	58.6925	2.43347
11.6582	58.6896	2.43548
11.6696	50.6861	2.43801
11.681	69.1361	2.44169
11.6924	65.8559	2.44315
11.7038	64.1369	2.44444
11.7153	64.1342	2.44574
11.7267	58.6721	2.44702
11.7381	67.5105	2.45119
11.7495	75.0589	2.46028
11.7609	72.1912	2.47397
11.7724	69.1166	2.47812
11.7838	77.7119	2.48198
11.7952	75.0504	2.48569
11.8066	69.1093	2.48935
11.818	67.4929	2.4929
11.8295	67.4904	2.49639
11.8409	76.3978	2.49969
11.8523	70.6621	2.50269
11.8637	75.0377	2.50551
11.8751	77.6963	2.5083
11.8866	80.1486	2.51112
11.898	70.6526	2.5139
11.9094	78.9435	2.51669
11.9208	83.438	2.51934
11.9322	86.2669	2.52175
11.9437	83.4349	2.52418
11.9551	81.2879	2.52657
11.9665	75.0186	2.52879
11.9779	73.608	2.53061
11.9893	78.9303	2.53191
12.0008	76.3693	2.53286
12.0122	69.0654	2.53378
12.0236	67.4476	2.53471
12.035	65.7781	2.53564
12.0464	58.5906	2.53657
12.0579	58.5877	2.5375
12.0693	54.6822	2.53844
12.0807	54.6791	2.53939
12.0921	44.0153	2.54034
12.1035	48.4312	2.54129
12.115	50.5602	2.54282
12.1264	39.3786	2.54513
12.1378	46.2371	2.54747
12.1492	39.3714	2.54866
12.1606	48.4147	2.54984
12.1721	43.991	2.55178
12.1835	41.6998	2.55517
12.1949	46.2202	2.55943
12.2063	52.6157	2.56206
12.2177	39.3497	2.5649
12.2292	50.5279	2.56776
12.2406	43.9702	2.57061
12.252	54.6331	2.57345
12.2634	43.9633	2.57628
12.2748	43.9598	2.57909
12.2863	48.3782	2.58188
12.2977	62.2257	2.58465
12.3091	52.5873	2.58742
12.3205	60.3963	2.58999
12.3319	52.581	2.59231
12.3434	50.4956	2.59456
12.3548	58.5119	2.5968
12.3662	58.509	2.59903
12.3776	70.5536	2.60127
12.389	70.5512	2.60358
12.4005	68.9825	2.60604
12.4119	63.9711	2.60857
12.4233	65.6898	2.6111
12.4347	60.3679	2.61363
12.4461	60.3651	2.61615
12.4576	58.4857	2.61871
12.469	68.9679	2.62124
12.4804	60.3566	2.62374
12.4918	67.3444	2.62585
12.5032	52.5337	2.62822
12.5147	73.5046	2.63078
12.5261	70.5229	2.63287
12.5375	73.5001	2.63344
12.5489	73.498	2.63612
12.5603		2.63883
12.6557		2.65678
12.6671		2.65857
12.6785	72.008	2.66074
12.6899	72.0057	2.66355
12.7014	74.882	2.66663
12.7128	76.2419	2.66968
12.7242	74.8778	2.67273
12.7356	80.0143	2.67578
12.747	80.0125	2.67883
12.7585	68.906	2.68191
12.7699	80.0089	2.68496
12.7813	82.2672	2.68801
12.7927	77.5384	2.68984
12.8041	78.7958	2.69137
12.8156	80.0016	2.69345
12.827	71.9783	2.6962
12.8384	81.1543	2.69845
12.8498	76.2173	2.70099
12.8612	77.5266	2.70335
12.8727	82.254	2.70463
12.8841	84.3074	2.70589
12.8955	81.1456	2.70715
12.9069	79.9872	2.70825
12.9183	76.205	2.70911
12.9298	73.4245	2.70998
12.9412	74.8374	2.71084
12.9526	65.5693	2.71171
12.964	67.2402	2.71257
12.9754	74.831	2.71343
12.9869	67.2352	2.71431
12.9983	74.8268	2.71517
13.0097	67.2301	2.71603
13.0211	62.0511	2.7169
13.0325	70.4181	2.71776
13.044	68.845	2.71863
13.0554	52.3813	2.71949
13.0668	60.2109	2.72036
13.0782	68.8377	2.72122
13.0896	74.8098	2.72208
13.1011	67.2099	2.72311
13.1125	68.8303	2.72421
13.1239	68.8279	2.72559
13.1353	60.1939	2.72705
13.1467	58.3098	2.7285
13.1582	54.3892	2.72996
13.1696	67.1948	2.73141
13.181	62.0124	2.73286
13.1924	62.0097	2.73431
13.2038	62.0069	2.73577
13.2153	58.2922	2.73723
13.2267	65.5069	2.73868
13.2381	54.3677	2.74013
13.2495	48.099	2.74158
13.2609	68.7986	2.74304
13.2724	70.3685	2.7445
13.2838	60.157	2.74595
13.2952	58.2718	2.7474
13.3066	56.3349	2.74886
13.318	63.7585	2.75031
13.3295	60.1456	2.75177
13.3409	63.7531	2.75322
13.3523	58.2572	2.75467
13.3637	54.3338	2.75612
13.3751	65.4731	2.75758
13.3866	65.4705	2.75904
13.398	63.7397	2.76005
13.4094	73.3318	2.76077
13.4208	73.3296	2.7615
13.4322	68.7619	2.76223
13.4437	63.729	2.76361
13.4551	56.2959	2.76505
13.4665	71.8503	2.76629
13.4779	61.9407	2.76767
13.4893	60.1059	2.76976
13.5008	52.2582	2.77163
13.5122	48.0227	2.77292
13.5236	73.3097	2.77421
13.535	68.7399	2.77551
13.5464	56.2719	2.7768
13.5579	58.2047	2.7781
13.5693	60.086	2.77939
13.5807	45.8088	2.78068
13.5921	68.7276	2.78197
13.6005	68.5972	2.78293
13.6119	70.1737	2.78422
13.6233	63.5458	2.78551
13.6347	74.5961	2.78681
13.6461	71.694	2.7881
13.6576	70.1642	2.78945
13.669	74.5897	2.79081
13.6804	71.6871	2.79223
13.6918	65.264	2.79371
13.7032	65.2614	2.79538
13.7147	65.2587	2.79706
13.7261	65.2561	2.79872
13.7375	68.5679	2.80038
13.7489	68.5654	2.80204
13.7603		2.80367
13.8557		2.8151
13.8671		2.81669
13.8785	63.4857	2.81839
13.8899	71.645	2.82019
13.9014	68.5327	2.82202
13.9128	73.1181	2.82394
13.9242	71.6382	2.82592
13.9356	71.6359	2.8282
13.947	61.6819	2.83056
13.9585	57.9487	2.8331
13.9699	66.885	2.83562
13.9813	70.0969	2.83814
13.9927	59.8312	2.84066
14.0041	65.1926	2.84318
14.0156	63.4535	2.84572
14.027	49.8488	2.84825
14.0384	49.8455	2.84969
14.0498	45.491	2.85095
14.0612	53.984	2.85221
14.0727	59.8113	2.85365
14.0841	61.6487	2.85617
14.0955	65.1718	2.85869
14.1069	55.967	2.86121
14.1183	61.6404	2.86477
14.1298	65.1639	2.86985
14.1412	65.1613	2.8735
14.1526	59.7914	2.87602
14.164	68.4763	2.8785
14.1754	65.1535	2.88098
14.1869	63.4132	2.88305
14.1983	65.1483	2.88503
14.2097	55.94	2.88689
14.2211	51.8931	2.88883
14.2325	63.4024	2.89139
14.244	63.3997	2.89402
14.2554	68.4567	2.89676
14.2668	73.0494	2.89951
14.2782	65.13	2.90225
14.2896	57.8639	2.90499
14.3011	66.8117	2.90776
14.3125	63.3836	2.91049
14.3239	71.5578	2.9132
14.3353	63.3782	2.91584
14.3467	68.4371	2.91846
14.3582	65.1117	2.92061
14.3696	68.4322	2.92269
14.381	55.8949	2.92446
14.3924	55.8919	2.92624
14.4038	55.8889	2.92803
14.4153	65.0987	2.92991
14.4267	59.7231	2.93191
14.4381	65.0935	2.9339
14.4495	51.8298	2.93589
14.4609	55.8739	2.93789
14.4724	57.8171	2.93991
14.4838	59.7088	2.94191
14.4952	59.706	2.94391
14.5066	57.8083	2.94591
14.518	66.7635	2.94791
14.5295	63.3325	2.94991
14.5409	65.0699	2.95183
14.5523	57.7966	2.95351
14.5637	68.3904	2.95519
14.5751	65.0621	2.95686
14.5866	47.5364	2.95855
14.598	68.3831	2.96022
14.6094	53.836	2.96189
14.6208	55.8318	2.96356
14.6322	49.6771	2.96521
14.6437	63.3056	2.96686
14.6551	47.5165	2.96852
14.6665	53.8206	2.97015
14.6779	55.8168	2.97105
14.6893	49.6608	2.97195
14.7008	57.7585	2.97285
14.7122	53.8082	2.97403
14.7236	59.649	2.97586
14.735	63.2841	2.97769
14.7464	59.6433	2.97952
14.7579	65.0203	2.98243
14.7693	53.7928	2.98609
14.7807	53.7897	2.98844
14.7921	59.6319	2.99027
14.8035	55.7837	2.99211
14.815	66.6977	2.99397
14.8264	63.2625	2.99537
14.8378	61.466	2.99677
14.8492	57.7205	2.99811
14.8606	57.7176	2.9994
14.8721	53.765	3.00067
14.8835	42.9841	3.00179
14.8949	55.7596	3.0029
14.9063	49.5992	3.00399
14.9177	61.4466	3.00507
14.9292	51.697	3.00615
14.9406	51.6938	3.00722
14.952	51.6907	3.00828
14.9634	57.6912	3.00939
14.9748	45.2157	3.01051
14.9863	47.4202	3.01169
14.9977	53.7311	3.01293
15.0091	45.2055	3.01417
15.0205	55.7266	3.01541
15.0319	42.9388	3.01665
15.0434	28.2913	3.0179
15.0548	47.4003	3.01914
15.0662	35.8383	3.02038
15.0776	42.9249	3.02162
15.089	33.3641	3.02286
15.1005	40.606	3.02411
15.1119	35.8234	3.02535
15.1233	33.3527	3.02659
15.1347	22.964	3.02783
15.1461	38.2279	3.02907
15.1576	30.8224	3.03032
15.169	42.8971	3.03155
15.1804	35.8011	3.03281
15.1918	17.4405	3.03409
15.2032	30.8069	3.03536
15.2147	30.803	3.03665
15.2261	40.5669	3.03793
15.2375	33.3147	3.03895
15.2489	33.3109	3.03986
15.2603	40.5562	3.04077
15.2718	42.8658	3.04179
15.2832	33.2996	3.04307
15.2946	30.7759	3.04434
15.306	40.542	3.04561
15.3174		3.04688
16.4824		3.15181
16.4938	38.0356	3.15292
16.5052	44.9815	3.15403
16.5167	51.4632	3.15514
16.5281	55.5254	3.15626
16.5395	40.3894	3.15737
16.5509	44.9679	3.15848
16.5623	44.9645	3.15959
16.5738	38.0101	3.16071
16.5852	35.5861	3.16182
16.5966	33.1104	3.16293
16.608	40.3681	3.16404
16.6194	49.3239	3.16515
16.6309	40.3609	3.16627
16.6423	40.3574	3.16737
16.6537	40.3538	3.16848
16.6651	37.981	3.16959
16.6765	35.5564	3.1707
16.688	44.927	3.17182
16.6994	22.6688	3.17294
16.7108	55.4772	3.17383
16.7222	35.5415	3.17439
16.7336	35.5378	3.17495
16.7451	44.91	3.17551
16.7565	40.3218	3.17608
16.7679	44.9032	3.17709
16.7793	40.3147	3.17846
16.7907	40.3111	3.17986
16.8022	42.6261	3.18154
16.8136	49.2687	3.1832
16.825	37.9301	3.18467
16.8364	51.3745	3.18607
16.8478	35.5007	3.18788
16.8593	49.2557	3.19072
16.8707	40.2862	3.19352
16.8821	44.8692	3.1951
16.8935	40.2791	3.19651
16.9049	44.8624	3.19791
16.9164	55.423	3.19932
16.9278	51.3491	3.20072
16.9392	35.4709	3.20213
16.9506	40.2613	3.20353
16.962	51.3396	3.20493
16.9735	47.0584	3.20634
16.9849	32.9813	3.20772
16.9963	49.2168	3.20902
17.0077	40.2434	3.21032
17.0191	25.2352	3.21153
17.0306	32.9661	3.21272
17.042	42.553	3.21388
17.0534		3.21504
17.0648		3.21619
17.0762	44.8113	3.21734
17.0877	42.539	3.2185
17.0991	40.2149	3.21965
17.1105	44.8011	3.2208
17.1219	27.8296	3.22195
17.1333	42.5251	3.22312
17.1448	27.8216	3.2243
17.1562	32.9243	3.22548
17.1676	27.8137	3.22667
17.179	55.3537	3.22786
17.1904	46.9952	3.22905
17.2019	46.9919	3.23025
17.2133	51.2699	3.23144
17.2247	25.1627	3.23263
17.2361	37.799	3.23382
17.2475	40.1687	3.23501
17.259	46.9753	3.23621
17.2704	42.4833	3.2374
17.2818	35.3594	3.23859
17.2932	37.7808	3.23978
17.3046	32.875	3.24097
17.3161	40.1473	3.24221
17.3275	46.9553	3.24365
17.3389	32.8636	3.2451
17.3503	37.7626	3.2466
17.3617	46.9453	3.24812
17.3732	35.3296	3.24965
17.3846	55.2995	3.25117
17.396	55.2965	3.25269
17.4074	42.4415	3.25422
17.4188	42.438	3.25574
17.4303	53.2744	3.25728
17.4417	46.922	3.2588
17.4531	42.4276	3.26032
17.4645	40.101	3.26185
17.4759	51.197	3.26337
17.4874	49.0771	3.26491
17.4988	59.1415	3.26643
17.5102	53.2527	3.26795
17.5216	32.8029	3.26948
17.533	42.4032	3.271
17.5445	22.3647	3.27195
17.5559	25.0457	3.27271
17.5673	35.2664	3.27347
17.5787	27.6714	3.27423
17.5901	32.7801	3.27499
17.6016	25.0296	3.27596
17.613	40.0547	3.27694
17.6244	30.238	3.27781
17.6358	35.2441	3.27858
17.6472	19.5903	3.27935
17.6587	22.3236	3.28005
17.6701	30.2224	3.28075
17.6815	30.2186	3.28188
17.6929	30.2147	3.28324
17.7043	27.6279	3.28443
17.7158	49.0121	3.28511
17.7272	32.7345	3.28579
17.7386	42.3404	3.28646
17.75	40.0119	3.28714
17.7614		3.28781
17.7997		3.29008
17.8111		3.29076
17.8225	27.587	3.29144
17.8339	30.1668	3.29212
17.8454	30.1629	3.29283
17.8568	42.3044	3.29357
17.8682	35.1684	3.29431
17.8796	24.9314	3.29509
17.891	37.5902	3.29587
17.9025	48.9589	3.29666
17.9139	32.6724	3.29744
17.9253	39.9572	3.29822
17.9367	35.1461	3.299
17.9481	35.1423	3.29978
17.9596	35.1386	3.30057
17.971	30.1203	3.30135
17.9824	30.1164	3.30206
17.9938	30.1125	3.30266
18.0052	35.1237	3.30326
18.0167	48.9264	3.30387
18.0281	37.5465	3.30448
18.0395	37.5429	3.30511
18.0509	32.6268	3.30576
18.0623	42.2416	3.30638
18.0738	39.9109	3.30669
18.0852	39.9073	3.307
18.0966	19.4254	3.3073
18.108	35.0903	3.30761
18.1194	32.604	3.30792
18.1309	27.4802	3.30857
18.1423	22.1494	3.30932
18.1537	24.8346	3.30985
18.1651	22.1412	3.31002
18.1765	13.7591	3.31019
18.188	16.5991	3.311
18.1994	16.5948	3.31184
18.2108	37.4882	3.31268
18.2222	30.035	3.31352
18.2336	32.566	3.31446
18.2451	13.7329	3.31633
18.2565	22.1083	3.31818
18.2679	30.0195	3.31947
18.2793	27.4288	3.32052
18.2907	32.547	3.32156
18.3022	24.7821	3.32262
18.3136	22.0878	3.32368
18.325	30.0001	3.32473
18.3364	37.4482	3.32578
18.3478	22.0754	3.32684
18.3593	19.329	3.3279
18.3707	46.6512	3.32896
18.3821	22.0631	3.33056
18.3935	39.8111	3.33217
18.4049	42.137	3.33377
18.4164	24.7418	3.33539
18.4278	37.419	3.33699
18.4392	22.0425	3.33859
18.4506	32.4938	3.3402
18.462	19.2913	3.3418
18.4735	29.9497	3.34342
18.4849	22.0261	3.34502
18.4963	22.022	3.34663
18.5077	29.9381	3.34823
18.5191	32.4711	3.34984
18.5306	29.9303	3.35145
18.542	34.9488	3.35301
18.5534	37.379	3.35448
18.5648	24.6894	3.35504
18.5762	29.9148	3.35561
18.5877	32.4482	3.35618
18.5991	24.6773	3.35669
18.6105	27.314	3.3572
18.6219	42.0708	3.3577
18.6333	29.8954	3.3579
18.6448	34.9153	3.35796
18.6562	42.0603	3.35796
18.6676	27.2942	3.35796
18.679	34.9042	3.35796
18.6904	21.9521	3.35796
18.7019	27.2824	3.35809
18.7133	29.8682	3.35847
18.7247	34.8893	3.35876
18.7361	29.8605	3.35902
18.7475	29.8566	3.35928
18.759	48.715	3.35969
18.7704	27.2586	3.36023
18.7818	29.845	3.36078
18.7932	39.6863	3.36191
18.8046	21.9109	3.36401
18.8161	16.3643	3.36696
18.8275	39.6756	3.37023
18.8389	42.0045	3.37396
18.8503	29.8217	3.37652
18.8617	32.357	3.37828
18.8732	29.8139	3.38005
18.8846	39.6577	3.38175
18.896	34.8334	3.38341
18.9074	37.266	3.38497
18.9188	27.2072	3.38647
18.9303	24.5603	3.38785
18.9417	16.3173	3.3892
18.9531	19.1111	3.39055
18.9645	34.8111	3.39189
18.9759	24.5441	3.39326
18.9874	13.4504	3.39466
18.9988	21.841	3.39667
19.0102	19.0901	3.39886
19.0216	21.8328	3.40129
19.033	21.8287	3.40375
19.0445	32.2962	3.40624
19.0559	13.4243	3.40871
19.0673	32.2886	3.41118
19.0787	32.2848	3.41364
19.0901	21.8081	3.41611
19.1016	29.7364	3.4186
19.113	27.1399	3.42107
19.1244	24.4916	3.42354
19.1358	27.132	3.42601
19.1472	24.4836	3.42848
19.1587	21.7834	3.43071
19.1701	10.4781	3.43271
19.1815	19.0272	3.43403
19.1929	37.1748	3.43531
19.2043	19.0189	3.4366
19.2158	19.0147	3.43792
19.2272	44.1694	3.43922
19.2386	29.6898	3.44054
19.25	39.5436	3.44185
19.2614		3.44316
19.2997		3.44547
19.3111		3.44678
19.3225	41.8567	3.44809
19.3339	34.6907	3.4494
19.3454	27.0594	3.45072
19.3568	29.6496	3.45203
19.3682	29.6458	3.45334
19.3796	29.6419	3.45566
19.391	41.8358	3.45806
19.4025	21.6956	3.45938
19.4139	41.8288	3.46069
19.4253	21.6874	3.462
19.4367	27.0277	3.46331
19.4481	44.1034	3.46462
19.4596	39.4781	3.46594
19.471	32.1542	3.46725
19.4824	39.471	3.46856
19.4938	39.4674	3.46983
19.5052	34.6348	3.47105
19.5167	34.6311	3.47225
19.5281	21.6503	3.47342
19.5395	46.3101	3.47459
19.5509	29.5837	3.47575
19.5623	24.3369	3.47884
19.5738	32.12	3.4826
19.5852	32.1162	3.48714
19.5966	39.4353	3.49251
19.608	37.0423	3.49831
19.6194	13.2098	3.50411
19.6309	26.9604	3.50984
19.6423	24.3086	3.51539
19.6537	29.5488	3.51966
19.6651	29.5449	3.52375
19.6765	21.5968	3.52781
19.688	29.5371	3.53191
19.6994	29.5332	3.53597
19.7108	29.5294	3.54002
19.7222	18.8288	3.54409
19.7336	16.0212	3.54818
19.7451	26.9208	3.55372
19.7565	29.5138	3.55946
19.7679	24.2642	3.56545
19.7793	29.5061	3.57144
19.7907	29.5022	3.57724
19.8022	15.9956	3.58186
19.8136	24.2481	3.58458
19.825	26.8931	3.58581
19.8364	26.8892	3.58705
19.8478	15.9785	3.58842
19.8593	10.211	3.59005
19.8707	26.8773	3.59152
19.8821	10.2021	3.59294
19.8935	29.4672	3.59435
19.9049	24.2158	3.59577
19.9164	7.22935	3.5972
19.9278	18.7533	3.59977
19.9392	18.7491	3.60204
19.9506	29.4479	3.60332
19.962	26.8456	3.60461
19.9735	15.9315	3.6059
19.9849	29.4362	3.60719
19.9963	21.4816	3.60848
20.0077	39.3068	3.60976
20.0191	31.9717	3.61104
20.0306	31.9679	3.61234
20.042	18.7114	3.61363
20.0534	29.4129	3.61491
20.0648	41.6298	3.6162
20.0762	15.8931	3.61748
20.0877	21.4487	3.61878
20.0991	36.8855	3.62006
20.1105	24.1431	3.62135
20.1219	31.9374	3.62251
20.1333	18.6778	3.62349
20.1448	31.9298	3.62414
20.1562	15.8632	3.62462
20.1676	21.4199	3.62506
20.179	26.7704	3.62553
20.1904	26.7664	3.62618
20.2019	24.1108	3.62699
20.2133	24.1068	3.62803
20.2247	34.4001	3.62927
20.2361	21.3952	3.6306
20.2475	26.7466	3.63193
20.259	41.5704	3.63332
20.2704	34.3852	3.63498
20.2818	29.3353	3.6364
20.2932	41.56	3.63773
20.3046	39.214	3.63906
20.3161	39.2104	3.64041
20.3275	18.6065	3.64174
20.3389	41.546	3.64307
20.3503	34.3591	3.6444
20.3617	24.0543	3.64573
20.3732	36.7979	3.64707
20.3846	29.3003	3.64841
20.396	36.7906	3.64969
20.4074	29.2926	3.65075
20.4188	41.5216	3.65193
20.4303	34.333	3.65327
20.4417	29.2809	3.65461
20.4531	39.1675	3.65594
20.4645	12.8879	3.65727
20.4759	21.3088	3.6586
20.4874	26.6634	3.65994
20.4988	29.2615	3.66127
20.5102	34.3069	3.6626
20.5216	26.6516	3.66393
20.533	12.8619	3.66527
20.5445	26.6436	3.66661
20.5559	34.292	3.66794
20.5673	21.2758	3.66927
20.5787	34.2846	3.6706
20.5901	34.2808	3.67193
20.6016	18.5058	3.67272
20.613	26.6199	3.67317
20.6244	26.6159	3.67361
20.6358	29.2149	3.67406
20.6472	23.9533	3.6745
20.6587	23.9493	3.67526
20.6701	36.703	3.67659
20.6815	21.2347	3.67792
20.6929	26.5922	3.67925
20.7043	45.9698	3.68058
20.7158	31.7396	3.68193
20.7272	34.2361	3.68326
20.7386	34.2324	3.68558
20.75	39.0747	3.68999
20.7614		3.69252
20.7997		3.69605
20.8111		3.6971
20.8225	34.205	3.69815
20.8339	31.7002	3.6992
20.8454	36.647	3.70027
20.8568	39.0412	3.70132
20.8682	39.0377	3.70237
20.8796	23.8711	3.70342
20.891	39.0306	3.70447
20.9025	34.1789	3.70553
20.9139	39.0234	3.70659
20.9253	23.855	3.70764
20.9367	34.1677	3.70869
20.9481	21.1386	3.70974
20.9596	50.2277	3.7108
20.971	39.0055	3.71185
20.9824	36.6032	3.71291
20.9938	29.0932	3.71396
21.0052	36.5959	3.71501
21.0167	43.6344	3.71607
21.0281	21.1097	3.71712
21.0395	34.1342	3.71818
21.0509	23.8106	3.71923
21.0623	23.8065	3.72028
21.0738	41.3211	3.72134
21.0852	38.9698	3.72239
21.0966	31.6127	3.72344
21.108	41.3107	3.7245
21.1194	38.9591	3.72555
21.1309	34.1043	3.72661
21.1423	41.3002	3.72766
21.1537	43.5933	3.72871
21.1651	41.2932	3.72976
21.1765	45.8317	3.73082
21.188	34.0857	3.73188
21.1994	31.5784	3.73279
21.2108	38.9305	3.73331
21.2222	43.5729	3.73384
21.2336	41.2722	3.73437
21.2451	43.566	3.7353
21.2565	52.2357	3.73635
21.2679	43.5592	3.7374
21.2793	41.2582	3.73845
21.2907	45.7983	3.7395
21.3022	43.5489	3.74056
21.3136	47.9861	3.74162
21.325	36.4937	3.74343
21.3364	34.0372	3.74553
21.3478	52.2109	3.74662
21.3593	26.361	3.74768
21.3707	34.026	3.74873
21.3821	38.8769	3.74979
21.3935	34.0186	3.75084
21.4049	43.5182	3.75198
21.4164	50.1003	3.75317
21.4278	31.5023	3.75435
21.4392	28.9417	3.75553
21.4506	33.9999	3.75672
21.462	43.5011	3.7579
21.4735	33.9924	3.75909
21.4849	61.861	3.76027
21.4963	38.8412	3.76145
21.5077	33.9813	3.76263
21.5191	31.4718	3.76381
21.5306	33.9738	3.765
21.542	41.1778	3.76618
21.5534	31.4604	3.76737
21.5648	31.4566	3.76855
21.5762	43.4669	3.76973
21.5877	31.449	3.77039
21.5991	31.4452	3.77098
21.6105	47.9013	3.77157
21.6219	36.3987	3.77238
21.6333	45.6981	3.77356
21.6448	36.3914	3.77476
21.6562	36.3878	3.77594
21.6676	41.1394	3.77712
21.679	36.3805	3.7783
21.6904	50.0239	3.77948
21.7019	28.8523	3.78109
21.7133	33.9141	3.78345
21.7247	28.8446	3.78511
21.7361	26.2303	3.78629
21.7475	36.3585	3.78747
21.759	33.8992	3.78867
21.7704	18.0765	3.78985
21.7818	36.3476	3.79078
21.7932	38.7482	3.79118
21.8046	36.3403	3.79159
21.8161	43.3951	3.792
21.8275	28.8096	3.7924
21.8389	43.3882	3.79285
21.8503	41.0834	3.79406
21.8617	33.8657	3.79528
21.8732	26.1827	3.79651
21.8846	33.8582	3.79772
21.896	33.8544	3.79894
21.9074	45.6179	3.80015
21.9188	41.0624	3.80141
21.9303	38.7053	3.80509
21.9417	45.6078	3.80809
21.9531	41.0519	3.8093
21.9645	45.6012	3.81052
21.9759	41.0449	3.81173
21.9874	31.3157	3.81296
21.9988	45.5911	3.81418
22.0102	52.0306	3.81539
22.0216	52.0275	3.81661
22.033	58.0029	3.81782
22.0445	56.0587	3.81905
22.0559	54.0627	3.82026
22.0673	36.2563	3.82148
22.0787	31.2853	3.8227
22.0901	43.313	3.82391
22.1016	38.6517	3.82514
22.113	33.7835	3.82635
22.1244	28.7086	3.82757
22.1358	45.551	3.82878
22.1472	23.4227	3.83
22.1587	38.6338	3.83122
22.1701	31.2548	3.83244
22.1815	26.0757	3.83366
22.1929	36.2161	3.83487
22.2043	40.975	3.83609
22.2158	20.6815	3.83731
22.2272	36.2051	3.83853
22.2386	17.9045	3.83974
22.25	45.5176	3.84096
22.2614		3.84216
22.2997		3.84595
22.3111		3.84707
22.3225	26.0267	3.8482
22.3339	53.9889	3.84933
22.3439	36.5119	3.85031
22.3553	34.0559	3.85144
22.3667	21.0151	3.85257
22.3782	45.795	3.8537
22.3896	43.5455	3.85483
22.401	43.5421	3.85591
22.4124	36.49	3.85647
22.4238	31.529	3.85704
22.4353	34.0297	3.85761
22.4467	41.2303	3.85849
22.4581	45.7716	3.85962
22.4695	43.5216	3.86074
22.4809	28.9534	3.86187
22.4924	26.3412	3.86301
22.5038	26.3372	3.86413
22.5152	34.0036	3.86526
22.5266	38.8555	3.86699
22.538	23.6651	3.86925
22.5495	43.4976	3.87063
22.5609	31.4833	3.87176
22.5723	38.8412	3.87288
22.5837	15.3576	3.87401
22.5951	26.3056	3.87514
22.6066	31.468	3.87627
22.618	26.2976	3.8774
22.6294	28.9029	3.87853
22.6408	20.9162	3.87965
22.6522	15.332	3.87988
22.6637	20.908	3.88144
22.6751	28.8873	3.88304
22.6865	26.2738	3.88417
22.6979	38.8018	3.88529
22.7093	28.8757	3.88642
22.7208	23.6004	3.88756
22.7322	26.258	3.88868
22.7436	20.8792	3.88981
22.755	3.51084	3.89094
22.7664	15.2892	3.89206
22.7779	23.5803	3.8932
22.7893	28.8485	3.89433
22.8007	28.8446	3.89545
22.8121	20.8544	3.89658
22.8235	36.3585	3.89771
22.835	20.8462	3.89884
22.8464	26.2184	3.89992
22.8578	12.3861	3.90049
22.8692	33.888	3.90105
22.8806	20.8298	3.90161
22.8921	33.8805	3.9025
22.9035	31.369	3.90363
22.9149	15.2337	3.90476
22.9263	28.8018	3.90588
22.9377	23.5237	3.90701
22.9492	23.5197	3.90807
22.9606	23.5156	3.90896
22.972	20.7968	3.91032
22.9834	20.7927	3.9121
22.9948	6.43932	3.91317
23.0063	38.7053	3.91407
23.0177	38.7018	3.91495
23.0291	36.2928	3.91584
23.0405	31.3233	3.91673
23.0519	41.0449	3.91761
23.0634	45.5945	3.91851
23.0748	31.3119	3.91939
23.0862	45.5878	3.92028
23.0976	36.2709	3.92151
23.109	41.0274	3.92274
23.1205	41.0239	3.92399
23.1319	38.666	3.92522
23.1433	36.2563	3.92645
23.1547	45.5677	3.92769
23.1661	23.4429	3.92892
23.1776	31.2776	3.93017
23.189	38.6481	3.9314
23.2004	47.7543	3.93263
23.2118	31.2662	3.93387
23.2232	31.2624	3.9351
23.2347	31.2586	3.93634
23.2461	40.9854	3.93757
23.2575	31.251	3.93878
23.2689	25.1973	3.93999
23.2803	31.2472	3.9412
23.2918	23.4025	3.94242
23.3032	20.6815	3.94363
23.3146	26.0598	3.94484
23.326	33.7425	3.94605
23.3374	17.9003	3.94726
23.3757		3.94979
23.3871		3.951
23.3985		3.95221
23.4099	28.6412	3.95342
23.4214	33.7114	3.95464
23.4328	36.1673	3.95593
23.4442	40.9282	3.95835
23.4556	26.0109	3.95996
23.467	26.0069	3.96138
23.4785	26.003	3.96282
23.4899	28.6139	3.96424
23.5013	33.6852	3.96566
23.5127	20.6059	3.96708
23.5241	25.9871	3.9685
23.5356	38.5432	3.96993
23.547	23.3121	3.97135
23.5584	17.8191	3.97277
23.5698	23.3041	3.97419
23.5812	23.3	3.97561
23.5927	28.579	3.97705
23.6041	23.2919	3.97847
23.6155	45.4361	3.97989
23.6269	25.9514	3.98131
23.6383	45.4295	3.98273
23.6498	23.2758	3.98416
23.6612	25.9395	3.98558
23.6726	36.0906	3.987
23.684	20.5441	3.98842
23.6954	38.4931	3.9895
23.7069	43.1544	3.98998
23.7183	38.4859	3.99045
23.7297	38.4823	3.99092
23.7411	38.4788	3.99194
23.7525	36.065	3.99337
23.764	36.0614	3.9948
23.7754	40.8268	3.99622
23.7868	31.0782	3.99707
23.7982	36.0504	3.99778
23.8096	31.0706	3.99948
23.8211	36.0431	4.0039
23.8325	40.8093	4.00537
23.8439	23.2071	4.00684
23.8553	28.4896	4.00831
23.8667	28.4857	4.0101
23.8782	38.4358	4.01307
23.8896	11.9973	4.01459
23.901	25.8563	4.01606
23.9124	28.4701	4.01753
23.9238	38.4215	4.019
23.9353	25.8444	4.02048
23.9467	31.0249	4.02195
23.9581	33.5359	4.02342
23.9695	9.03882	4.02489
23.9809	23.1586	4.02636
23.9924	14.8347	4.02785
24.0038	28.439	4.02932
24.0152	31.002	4.03079
24.0266	25.8126	4.03226
24.038	28.4274	4.03373
24.0495	20.4123	4.03521
24.0609	17.6344	4.03668
24.0723	25.7968	4.03815
24.0837	25.7928	4.03962
24.0951	23.1181	4.04109
24.1066	23.1141	4.04258
24.118	25.7809	4.04405
24.1294	25.7769	4.04552
24.1408	23.102	4.04699
24.1522	38.35	4.04846
24.1637	35.9334	4.04994
24.1751	28.3807	4.05141
24.1865	38.3392	4.05288
24.1979	28.3729	4.05435
24.2093	28.369	4.05582
24.2208	33.4501	4.0566
24.2322	20.3463	4.05734
24.2436	28.3574	4.05839
24.255	33.4389	4.05986
24.2664	14.7321	4.06133
24.2779	40.6727	4.06281
24.2893	30.9106	4.06435
24.3007	30.9068	4.06867
24.3121	25.7135	4.07134
24.3235	33.4165	4.0731
24.335	20.3093	4.07488
24.3464	25.7016	4.07665
24.3578	30.8877	4.07841
24.3692	28.3146	4.0793
24.3806	38.2784	4.0806
24.3921	38.2748	4.08238
24.4035	38.2712	4.08415
24.4149	28.299	4.08591
24.4263	35.8493	4.08767
24.4377	28.2913	4.08944
24.4492	22.9928	4.09122
24.4606	38.2533	4.09298
24.472	20.2598	4.09475
24.4834	25.654	4.09651
24.4948	22.9766	4.09827
24.5063	33.3567	4.10005
24.5177	30.8343	4.10182
24.5291	33.3493	4.10358
24.5405	14.6295	4.10534
24.5519	28.2524	4.10711
24.5634	28.2485	4.10889
24.5748	20.2227	4.11065
24.5862	40.5782	4.11242
24.5976	30.8077	4.11418
24.609	38.2068	4.11594
24.6205	25.6064	4.11772
24.6319	38.1996	4.11949
24.6433	33.3119	4.12125
24.6547	30.7886	4.12302
24.6661	30.7848	4.12478
24.6776	20.1857	4.12656
24.689	42.8599	4.12832
24.7004	33.2933	4.12937
24.7118	28.198	4.13025
24.7232	28.194	4.13139
24.7347	38.1674	4.13316
24.7461	47.3153	4.13461
24.7575	35.7432	4.136
24.7689	35.7396	4.13737
24.7803	38.1531	4.13907
24.7918	40.5152	4.14184
24.8032	42.8257	4.14324
24.8146	45.0848	4.14462
24.826	30.7314	4.14599
24.8374	47.2891	4.14736
24.8757		4.15198
24.8871		4.15335
24.8985		4.15473
24.9099	57.5514	4.1561
24.9214	51.5334	4.15749
24.9328	42.7868	4.15886
24.9442	35.6834	4.16023
24.9556	42.78	4.16161
24.967	40.4614	4.16298
24.9785	35.6725	4.16437
24.9899	38.0874	4.16574
25.0013	38.0838	4.16711
25.0127	45.0267	4.16849
25.0241	39.6719	4.16986
25.0356	42.7594	4.17125
25.047	47.2324	4.17334
25.0584	42.7525	4.17551
25.0698	47.2258	4.17758
25.0812	35.6432	4.1795
25.0927	30.6462	4.1814
25.1041	40.4228	4.18328
25.1155	32.3383	4.18516
25.1269	35.6322	4.18675
25.1383	33.1575	4.18769
25.1498	42.7286	4.18864
25.1612	47.2029	4.19033
25.1726	42.7217	4.19221
25.184	47.1963	4.19409
25.1954	49.3547	4.19597
25.2096	42.7115	4.19866
25.221	33.1314	4.20273
25.2324	49.3452	4.20495
25.2438	30.2389	4.20698
25.2553	27.6526	4.20903
25.2667	25.0146	4.21107
25.2781	25.0106	4.21293
25.2895	13.9531	4.21424
25.3009	35.2304	4.21555
25.3124	13.9445	4.21687
25.3238	32.7434	4.21818
25.3352	22.3045	4.21949
25.3466	22.3004	4.2208
25.358	30.2007	4.22211
25.3695	24.9789	4.22343
25.3809	32.7247	4.22474
[truncated: 30,522 more rows]
