# Supplementary material for: Variations in the Biological Pump through the Miocene: Evidence from organic carbon burial in Pacific Ocean sediments
Source: Copernicus journal article supplement (doi:10.5194/cp-2024-34), 2024-05-27
Supplement: Supplementary file 29 [file SuppTable_S4_574_Carbon_table.xlsx]

## Sheet: SuppTable_S4_U574_Carbon_table_
Site	Hole	Core	Type	Section	Interval	Depth (m CSF)	Depth (m CCSF)	Age (Ma)	C-org wt %	CaCO3 wt%	Bulk MAR (g/cm2/kyr)
574	A	2	H	1	5.5	6.355	6.355	1.36646	0.195535	41.7957	0.233948
574	A	2	H	1	105.5	7.355	7.355	1.55443	0.125803	76.0325	0.317582
574	A	2	H	2	55.5	8.355	8.355	1.72807	0.0573161	72.6388	0.276572
574	A	2	H	3	55.5	9.855	9.855	2.01648	0.145391	38.7048	0.373738
574	A	2	H	3	106	10.36	10.36	2.0939	0.108866	39.9173	0.244651
574	A	2	H	4	50.5	11.305	11.305	2.3269	0.0749367	60.9459	0.200534
574	A	2	H	5	5.5	12.355	12.355	2.59684	0.0696895	66.1983	0.252627
574	A	2	H	5	105.5	13.355	13.355	2.75501	0.0682673	60.8643	0.495277
574	A	2	H	6	55.5	14.355	14.355	2.92001	0.0834198	51.8529	0.300696
574	A	3	H	1	24.5	15.745	16.489	3.15245	0.139302	35.163	0.381052
574	A	3	H	1	124.5	16.745	17.489	3.26512	0.143135	31.6044	0.42537
574	A	3	H	2	55.5	17.555	18.299	3.32233	0.168973	21.9893	0.411879
574	A	3	H	3	7.5	18.575	19.319	3.44769	0.163171	19.8398	0.182965
574	A	3	H	3	105.5	19.555	20.299	3.63841	0.149563	25.6086	0.370702
574	A	3	H	4	50.5	20.505	21.249	3.73565	0.119174	38.5014	0.457083
574	A	3	H	5	6.5	21.565	22.309	3.84687	0.152182	35.4099	0.406341
574	A	3	H	5	105.5	22.555	23.299	3.94318	0.179674	21.6868	0.394426
574	A	3	H	6	50.5	23.505	24.249	4.05908	0.11401	30.7276	0.256253
574	A	4	H	1	54.5	24.445	25.185	4.19426	0.115766	44.3703	0.250911
574	A	4	H	1	144.5	25.345	26.085	4.31251	0.183413	27.6272	0.283759
574	A	4	H	2	96.5	26.365	27.105	4.42591	0.098187	41.5116	0.374463
574	A	4	H	3	50.5	27.405	28.145	4.57878	0.122676	34.1772	0.330508
574	A	4	H	3	145.5	28.355	29.095	4.70195	0.0889408	46.5914	0.260174
574	A	4	H	4	98.5	29.385	30.125	4.85972	0.117145	33.5374	0.289421
574	A	4	H	5	45.5	30.355	31.095	4.98333	0.0735809	54.6695	0.398804
574	A	4	H	5	132.5	31.225	31.965	5.16742	0.103388	44.1538	0.314488
574	A	4	H	6	97.5	32.375	33.115	5.34273	0.11521	30.755	0.228306
574	A	5	H	1	36.5	33.465	34.165	5.44584	0.132144	36.1046	0.505249
574	A	5	H	2	103.5	35.635	36.335	5.66523	0.125263	26.7022	0.480129
574	A	5	H	3	100.5	37.105	37.805	5.80067	0.168763	12.5791	0.589829
574	A	5	H	4	105.5	38.655	39.355	5.94242	0.161567	20.8815	0.26448
574	A	5	H	5	95.5	40.055	40.755	6.09017	0.15068	32.9075	0.482894
574	A	5	H	6	103.5	41.635	42.335	6.28343	0.0702004	68.2359	0.596071
574	A	6	H	1	100.5	43.405	45.987	6.65747	0.101627	53.2718	0.947068
574	A	6	H	2	100.5	44.905	47.487	6.74368	0.0963236	53.9129	0.791417
574	A	6	H	3	99.5	46.395	48.977	6.83841	0.0882006	70.4452	0.951996
574	A	6	H	4	100.5	47.905	50.487	6.90573	0.0444103	85.1672	2.38466
574	A	6	H	5	104.5	49.445	52.027	7.00624	0.0494982	83.7708	0.561241
574	A	6	H	6	103.5	50.935	53.517	7.10338	0.0444293	87.0703	2.07333
574	A	7	H	1	99.5	52.895	54.627	7.17217	0.102999	62.9474	0.666102
574	A	7	H	2	99.5	54.395	56.127	7.36562	0.084141	72.721	0.781788
574	A	7	H	3	100.5	55.905	57.637	7.53379	0.0555239	80.9663	0.817932
574	A	7	H	4	100.5	57.405	59.137	7.68958	0.102439	53.073	0.462352
574	A	7	H	5	94.5	58.845	60.577	7.82667	0.0854458	68.5925	0.887513
574	A	7	H	6	101.5	60.415	62.147	7.92912	0.0556632	85.9456	1.12557
574	A	8	H	1	103.5	62.435	64.845	8.14046	0.0829808	79.3282	0.78146
574	A	8	H	2	99.5	63.895	66.305	8.30654	0.0615483	84.3883	1.08209
574	A	8	H	3	98.5	65.385	67.795	8.43297	0.0605127	75.9003	0.983493
574	A	8	H	4	96.5	66.865	69.275	8.58128	0.0664405	79.6625	1.00665
574	A	8	H	5	101.5	68.415	70.825	8.76653	0.114875	54.0834	0.403891
574	A	8	H	6	100.5	69.905	72.315	8.91283	0.0792968	65.8112	0.490871
574	A	9	H	1	103.5	71.435	73.621	9.04738	0.121472	39.4648	0.461719
574	A	9	H	2	103.5	72.935	75.121	9.17242	0.122728	42.2968	0.593872
574	A	9	H	3	96.5	74.365	76.551	9.36485	0.104083	51.828	0.888675
574	A	9	H	4	100.5	75.905	78.091	9.56843	0.11044	18.1216	0.187597
574	A	9	H	5	100.5	77.405	79.591	9.73928	0.127564	3.60895	0.490283
574	A	9	H	6	100.5	78.905	81.091	9.85743	0.109209	17.4352	0.750157
574	A	10	H	1	101.5	80.915	83.101	10.1213	0.0570704	70.893	0.678232
574	A	10	H	2	100.5	82.405	84.591	10.282	0.0537867	70.1328	0.747544
574	A	10	H	3	100.5	83.905	86.091	10.4325	0.0688802	62.1788	0.474031
574	A	10	H	4	98.5	85.385	87.571	10.6198	0.0492451	78.6752	0.503707
574	A	10	H	5	100.5	86.905	89.091	10.8033	0.07397	64.4212	1.03913
574	A	10	H	6	100.5	88.405	90.591	10.9341	0.0438522	76.9028	0.933621
574	A	11	H	1	101.5	90.215	91.381	11.0116	0.0768711	69.5211	0.581785
574	A	11	H	2	97.5	91.675	92.841	11.1537	0.0725243	64.584	0.791658
574	A	11	H	3	101.5	93.215	94.381	11.3217	0.0721278	66.0409	0.831024
574	A	11	H	4	100.5	94.705	95.871	11.4311	0.0597712	69.0899	1.00652
574	A	11	H	5	102.5	96.225	97.391	11.5168	0.0377041	89.9863	1.76285
574	A	11	H	6	100.5	97.705	98.871	11.5883	0.0469169	86.4166	2.96868
574	A	12	H	1	100.5	99.705	100.981	11.6557	0.0844595	74.6582	2.384
574	A	12	H	2	113.5	101.335	102.611	11.7126	0.0653861	78.9429	2.81866
574	A	12	H	3	105.5	102.755	104.031	11.7546	0.0879415	89.7847	4.28628
574	A	12	H	4	98.5	104.185	105.461	11.7847	0.0644463	83.3269	4.32967
574	A	12	H	5	90.5	105.605	106.881	11.8243	0.0595374	85.0336	2.0107
574	A	12	H	6	103.5	107.235	108.511	11.9071	0.0540589	86.9693	3.19918
574	A	13	H	1	96.5	109.165	111.801	11.9964	0.0960789	87.8346	3.88889
574	A	13	H	3	100.5	112.205	114.841	12.0712	0.0435133	80.3779	3.03161
574	A	14	H	1	96.5	114.065	116.581	12.1247	0.0762435	86.5208	3.20228
574	A	14	H	2	100.5	115.605	118.121	12.168	0.0907833	65.5596	7.138
574	A	14	H	3	100.5	117.105	119.621	12.1797	0.0726539	72.6791	9.58328
574	A	15	H	1	30.5	118.305	121.135	12.1916	0.0577061	92.1362	12.0514
574	A	15	H	2	10.5	119.605	122.435	12.2018	0.0694193	91.8506	13.8725
574	A	15	H	2	40.5	119.905	122.735	12.2041	0.0652088	90.8891	13.9653
574	A	15	H	2	90.5	120.405	123.235	12.208	0.0605639	90.6632	14.12
574	A	15	H	2	140.5	120.905	123.735	12.212	0.0570407	89.9234	14.2747
574	A	15	H	3	40.5	121.405	124.235	12.2159	0.0476665	90.3029	14.4294
574	A	15	H	3	90.5	121.905	124.735	12.2198	0.061586	92.7842	14.5841
574	A	15	H	3	140.5	122.405	125.235	12.2237	0.0545683	92.8476	13.6948
574	A	15	H	4	10.5	122.605	125.435	12.2253	0.080705	92.9285	13.3167
574	A	16	H	1	45.5	123.255	126.371	12.2326	0.0804224	90.246	11.5469
574	A	16	H	1	90.5	123.705	126.821	12.2362	0.0621588	88.1132	10.6961
574	A	16	H	1	140.5	124.205	127.321	12.2401	0.0676094	87.5154	9.75073
574	A	16	H	2	40.5	124.705	127.821	12.244	0.0466369	91.8636	8.80536
574	A	16	H	2	90.5	125.205	128.321	12.2479	0.0721953	90.392	7.85999
574	A	16	H	2	140.5	125.705	128.821	12.2518	0.0794243	90.8984	6.91462
574	A	16	H	3	40.5	126.205	129.321	12.2558	0.0473132	90.205	5.96925
574	A	16	H	3	90.5	126.705	129.821	12.2597	0.0466133	90.3995	5.02389
574	A	16	H	3	120.5	127.005	130.121	12.262	0.0516808	92.0387	4.45666
574	A	17	H	1	40.5	128.205	130.285	12.2633	0.0754852	88.1933	4.14658
574	A	17	H	1	93.5	128.735	130.815	12.2675	0.0668483	81.1016	3.14449
574	A	17	H	1	140.5	129.205	131.285	12.2745	0.0690841	83.0757	2.25584
574	A	17	H	2	40.5	129.705	131.785	12.3081	0.0550892	87.294	1.6362
574	A	17	H	2	90.5	130.205	132.285	12.3383	0.0506076	85.6449	1.86048
574	A	17	H	2	140.5	130.705	132.785	12.369	0.0586632	88.105	1.87261
574	A	17	H	3	40.5	131.205	133.285	12.4022	0.0400837	88.6132	2.53816
574	A	17	H	3	90.5	131.705	133.785	12.4186	0.0612054	88.1744	2.76421
574	A	18	H	1	40.5	132.305	134.855	12.4849	0.0668617	84.8941	1.53573
574	A	18	H	1	90.5	132.805	135.355	12.5132	0.0713264	83.3298	1.6492
574	A	18	H	1	140.5	133.305	135.855	12.5536	0.0944096	77.407	0.77069
574	A	18	H	2	38.5	133.785	136.335	12.6134	0.0823096	77.7097	0.924584
574	A	18	H	2	92.5	134.325	136.875	12.6621	0.077635	81.9415	1.2043
574	A	18	H	2	140.5	134.805	137.355	12.6981	0.0900963	87.624	1.46552
574	A	18	H	3	40.5	135.305	137.855	12.7254	0.0709288	86.3815	1.57113
574	A	18	H	3	90.5	135.805	138.355	12.7647	0.0716305	87.138	1.34469
574	A	18	H	3	140.5	136.305	138.855	12.7978	0.0745616	84.0978	1.44782
574	A	18	H	4	40.5	136.805	139.355	12.8267	0.067041	87.9339	1.52666
574	A	18	H	4	91.5	137.315	139.865	12.8686	0.0646173	90.4051	1.49824
574	A	18	H	4	141.5	137.815	140.365	12.9034	0.0816507	83.9874	1.3175
574	A	18	H	5	40.5	138.305	140.855	12.9451	0.0684898	86.8712	1.13132
574	A	18	H	5	90.5	138.805	141.355	12.9888	0.0710281	85.2618	1.5789
574	A	18	H	5	140.5	139.305	141.855	13.0189	0.0816217	84.1788	1.72612
574	A	18	H	6	40.5	139.805	142.355	13.0501	0.0706598	89.1145	1.5802
574	A	18	H	6	90.5	140.305	142.855	13.0883	0.0581237	84.6912	1.20581
574	A	18	H	6	137.5	140.775	143.325	13.1381	0.0605568	84.315	1.10801
574	A	18	H	7	40.5	141.305	143.855	13.1638	0.0768357	82.7808	1.86229
574	A	19	H	1	40.5	141.805	145.871	13.2779	0.0650183	82.234	1.52932
574	A	19	H	1	90.5	142.305	146.371	13.3202	0.0609236	84.276	1.17456
574	A	19	H	1	140.5	142.805	146.871	13.3567	0.0328198	81.7134	1.45446
574	A	19	H	2	40.5	143.305	147.371	13.3869	0.0611518	88.079	1.74453
574	A	19	H	2	90.5	143.805	147.871	13.4127	0.0601015	87.8873	2.17938
574	A	19	H	2	140.5	144.305	148.371	13.4326	0.0581027	88.6734	2.26769
574	A	19	H	3	40.5	144.805	148.871	13.455	0.0606998	89.3799	2.23093
574	A	19	H	3	90.5	145.305	149.371	13.479	0.0594719	88.8566	2.85093
574	A	19	H	3	140.5	145.805	149.871	13.4935	0.0594367	88.0311	2.76473
574	A	19	H	4	40.5	146.305	150.371	13.508	0.0670889	87.9368	2.61224
574	A	19	H	4	90.5	146.805	150.871	13.5255	0.0897186	79.6694	2.44002
574	A	19	H	4	140.5	147.305	151.371	13.5469	0.0767964	86.2994	2.40322
574	A	19	H	5	40.5	147.805	151.871	13.5653	0.0661816	82.9868	2.67245
574	A	19	H	5	90.5	148.305	152.371	13.5818	0.0653713	84.2766	2.77548
574	A	19	H	5	140.5	148.805	152.871	13.598	0.078087	80.266	3.13909
574	A	19	H	6	40.5	149.305	153.371	13.6141	0.0712552	91.0192	3.5027
574	A	19	H	6	90.5	149.805	153.871	13.6284	0.0592026	89.2739	3.54329
574	A	19	H	6	140.5	150.305	154.371	13.6444	0.044042	90.2774	3.3635
574	A	19	H	7	40.5	150.805	154.871	13.6622	0.0548962	89.9335	3.08958
574	A	20	H	1	53.5	151.435	157.433	13.7885	0.0846794	81.9621	1.56436
574	A	20	H	1	90.5	151.805	157.803	13.8098	0.0755814	83.5443	1.38308
574	A	20	H	1	140.5	152.305	158.303	13.8455	0.0641026	88.1128	1.1381
574	A	20	H	2	40.5	152.805	158.803	13.8944	0.0567282	88.9565	1.01786
574	A	20	H	2	90.5	153.305	159.303	13.9365	0.0603081	87.3622	1.65022
574	A	20	H	2	140.5	153.805	159.803	13.9635	0.0649257	87.1555	1.53201
574	A	20	H	3	40.5	154.305	160.303	14.0041	0.0521297	85.894	1.29919
574	A	20	H	3	90.5	154.805	160.803	14.0539	0.0478629	88.3138	0.631871
574	A	20	H	3	140.5	155.305	161.303	14.1214	0.0560138	85.9523	1.06063
574	A	20	H	4	40.5	155.805	161.803	14.1622	0.0672885	75.5211	1.29484
574	A	20	H	4	90.5	156.305	162.303	14.2087	0.0443515	78.6738	0.877299
574	A	20	H	4	140.5	156.805	162.803	14.2559	0.0445227	84.3195	1.08111
574	A	20	H	5	40.5	157.305	163.303	14.3084	0.0518769	75.7603	1.05624
574	A	20	H	5	90.5	157.805	163.803	14.3441	0.0389542	76.6716	1.66269
574	A	20	H	5	140.5	158.305	164.303	14.368	0.0407276	92.162	3.06883
574	A	20	H	6	40.5	158.805	164.803	14.3808	0.0362488	88.5257	3.41876
574	A	20	H	6	90.5	159.305	165.303	14.3971	0.0300111	91.8626	3.04331
574	A	20	H	6	140.5	159.805	165.803	14.418	0.0327583	89.7695	2.75573
574	A	20	H	7	40.5	160.305	166.303	14.4408	0.0465587	91.1881	2.53148
574	A	21	H	1	40.5	160.305	167.215	14.4741	0.054337	89.284	4.08139
574	A	21	H	1	90.5	160.805	167.715	14.4864	0.0369846	89.2555	4.35669
574	A	21	H	1	140.5	161.305	168.215	14.4987	0.043183	88.8038	4.10512
574	A	21	H	2	40.5	161.805	168.715	14.513	0.0407466	89.3633	3.85354
574	A	21	H	2	90.5	162.305	169.215	14.5279	0.0431332	87.6525	3.16988
574	A	21	H	2	140.5	162.805	169.715	14.5519	0.0475023	86.897	2.08612
574	A	21	H	3	40.5	163.305	170.215	14.5954	0.0420682	87.6183	1.71409
574	A	21	H	3	90.5	163.805	170.715	14.6194	0.0419191	85.7564	2.33617
574	A	21	H	3	140.5	164.305	171.215	14.6433	0.0471462	87.6142	2.36226
574	A	21	H	4	40.5	164.805	171.715	14.6666	0.0363281	87.4482	2.45117
574	A	21	H	4	90.5	165.305	172.215	14.6897	0.0239448	87.6876	2.37443
574	A	21	H	4	140.5	165.805	172.715	14.7155	0.0410959	85.1703	2.04681
574	A	21	H	5	40.5	166.305	173.215	14.7479	0.0352349	86.9436	1.78481
574	A	21	H	5	90.5	166.805	173.715	14.778	0.0444653	86.9237	2.00574
574	A	21	H	5	140.5	167.305	174.215	14.8048	0.0379815	88.6703	2.14965
574	A	21	H	6	40.5	167.805	174.715	14.8312	0.0456517	88.4675	2.09274
574	A	21	H	6	40.5	167.805	174.715	14.8312	0.0387468	84.6147	2.09274
574	A	21	H	6	80.5	168.205	175.115	14.8522	0.0390753	86.3293	2.2206
574	A	22	H	1	40.5	168.805	175.595	14.8757	0.0438822	86.2688	2.50116
574	A	22	H	1	90.5	169.305	176.095	14.8945	0.0422938	89.2271	3.01861
574	A	22	H	1	140.5	169.805	176.595	14.9133	0.0494006	87.238	2.68182
574	A	22	H	2	40.5	170.305	177.095	14.9333	0.0484417	86.4977	1.96253
574	A	22	H	2	90.5	170.805	177.595	14.9796	0.045572	89.2957	1.63079
574	A	22	H	2	140.5	171.305	178.095	15.0055	0.0464276	91.0986	2.15562
574	A	22	H	3	40.5	171.805	178.595	15.0295	0.0460546	90.291	2.60413
574	A	22	H	3	90.5	172.305	179.095	15.0491	0.0404923	92.497	2.86486
574	A	22	H	3	140.5	172.805	179.595	15.0684	0.0401809	92.7605	2.89453
574	A	22	H	4	40.5	173.305	180.095	15.0877	0.0449698	78.9885	2.98708
574	A	22	H	4	90.5	173.805	180.595	15.1036	0.0506595	84.9278	3.35971
574	A	22	H	4	140.5	174.305	181.095	15.118	0.0403463	81.224	3.49933
574	A	22	H	5	40.5	174.805	181.595	15.1324	0.0338899	82.5509	3.63895
574	A	22	H	5	90.5	175.305	182.095	15.1467	0.0326816	90.2941	3.77857
574	A	22	H	5	140.5	175.805	182.595	15.1599	0.0453125	87.8915	3.91818
574	A	22	H	6	40.5	176.305	183.095	15.1729	0.032287	88.4408	4.013
574	A	22	H	6	90.5	176.805	183.595	15.1861	0.0359961	92.5479	3.7339
574	A	22	H	6	140.5	177.305	184.095	15.203	0.0508536	84.5859	3.05464
574	A	22	H	7	40.5	177.805	184.595	15.2201	0.0404927	79.772	2.57801
574	A	23	H	1	40.5	178.305	186.367	15.2787	0.0637731	77.7141	5.00592
574	A	23	H	1	90.5	178.805	186.867	15.2885	0.0463112	85.5402	4.49751
574	A	23	H	1	140.5	179.305	187.367	15.2983	0.0508589	84.1264	3.80527
574	A	23	H	2	40.5	179.805	187.867	15.3117	0.0433702	86.436	3.11303
574	A	23	H	2	90.5	180.305	188.367	15.3325	0.0489083	86.5424	4.5456
574	A	23	H	2	140.5	180.805	188.867	15.3431	0.0745721	64.4015	5.60103
574	A	23	H	3	40.5	181.305	189.367	15.3453	0.054188	85.0348	4.79967
574	A	23	H	3	90.5	181.805	189.867	15.3474	0.0629665	69.8518	3.99831
574	A	23	H	3	140.5	182.305	190.367	15.3581	0.0611462	81.5254	3.19695
574	A	23	H	4	40.5	182.805	190.867	15.38	0.0356839	84.6172	2.39723
574	A	23	H	4	90.5	183.305	191.367	15.4037	0.0370293	85.9344	2.64309
574	A	23	H	4	140.5	183.805	191.867	15.4256	0.0375752	86.0117	3.23143
574	A	23	H	5	40.5	184.305	192.367	15.4363	0.0636667	70.3167	3.1319
574	A	23	H	5	90.5	184.805	192.867	15.4502	0.0521206	84.654	3.10931
574	A	23	H	5	140.5	185.305	193.367	15.4626	0.0684635	72.7847	3.11284
574	A	23	H	6	40.5	185.805	193.867	15.4795	0.0387767	74.9251	3.11637
574	A	23	H	6	77.5	186.175	194.237	15.4885	0.0560497	83.8856	3.2761
574	C	1	R	1	40.5	194.905	202.777	15.7308	0.0380783	82.8803	1.8526
574	C	1	R	1	90.5	195.405	203.277	15.7698	0.0496238	85.4039	0.704371
574	C	1	R	1	140.5	195.905	203.777	15.9292	0.14	84.3726	0.605541
574	C	1	R	2	40.5	196.405	204.277	15.9934	0.0638413	88.114	1.06309
574	C	1	R	2	90.5	196.905	204.777	16.0432	0.0504382	89.3083	1.04547
574	C	1	R	2	140.5	197.405	205.277	16.0842	0.054636	80.0631	1.05963
574	C	1	R	3	40.5	197.905	205.777	16.1278	0.0693773	75.97	1.0738
574	C	1	R	3	90.5	198.405	206.277	16.1729	0.042567	79.9954	1.01085
574	C	1	R	3	140.5	198.905	206.777	16.2255	0.0396424	86.5064	1.03537
574	C	1	R	4	40.5	199.405	207.277	16.2713	0.0425445	88.1207	1.13953
574	C	1	R	4	90.5	199.905	207.777	16.3208	0.0364827	82.5497	1.03576
574	C	1	R	4	140.5	200.405	208.277	16.3552	0.0373404	84.6028	1.36004
574	C	1	R	5	40.5	200.905	208.777	16.38	0.0344469	88.816	2.10546
574	C	1	R	5	90.5	201.405	209.277	16.4093	0.0402584	72.3374	1.79738
574	C	1	R	5	140.5	201.905	209.777	16.4345	0.0780025	63.1837	1.59202
574	C	1	R	6	10.5	202.105	209.977	16.4438	0.0771857	49.9063	1.53035
574	C	2	R	1	40.5	204.405	210.555	16.4753	0.0437956	83.1632	1.35215
574	C	2	R	1	90.5	204.905	211.055	16.5165	0.0550021	74.7558	0.89712
574	C	2	R	1	140.5	205.405	211.555	16.5725	0.0573798	77.9899	0.71158
574	C	2	R	2	40.5	205.905	212.055	16.6357	0.0452744	72.4292	0.90577
574	C	2	R	2	90.5	206.405	212.555	16.6838	0.0672467	59.2427	0.7463
574	C	2	R	2	142.5	206.925	213.075	16.7514	0.0820178	69.6948	1.38651
574	C	2	R	3	40.5	207.405	213.555	16.7727	0.0479217	80.4992	2.25111
574	C	2	R	3	90.5	207.905	214.055	16.788	0.0452776	79.2798	2.63293
574	C	2	R	3	140.5	208.405	214.555	16.8111	0.0488762	83.5835	2.53821
574	C	2	R	4	40.5	208.905	215.055	16.834	0.0401593	82.7744	2.19523
574	C	2	R	4	90.5	209.405	215.555	16.8574	0.0441929	81.6117	2.22872
574	C	2	R	4	140.5	209.905	216.055	16.8791	0.0443821	80.1266	2.21674
574	C	2	R	5	46.5	210.465	216.615	16.9052	0.0473613	78.8433	2.14552
574	C	2	R	5	92.5	210.925	217.075	16.9246	0.0334988	75.4685	1.97766
574	C	2	R	5	143.5	211.435	217.585	16.9502	0.063104	60.7123	1.80016
574	C	2	R	6	40.5	211.905	218.055	16.9712	0.0582491	59.0139	1.53201
574	C	2	R	6	93.5	212.435	218.585	16.9922	0.0644219	52.0605	1.09921
574	C	2	R	6	140.5	212.905	219.055	17.0396	0.0460766	76.7315	0.78053
574	C	2	R	7	36.5	213.365	219.515	17.0954	0.0547742	73.7095	0.8164
574	C	3	R	1	40.5	213.905	220.055	17.1335	0.0715569	74.1426	1.39503
574	C	3	R	1	90.5	214.405	220.555	17.1585	0.0712811	73.2184	1.12147
574	C	3	R	1	140.5	214.905	221.055	17.1953	0.0657076	79.9209	2.92844
574	C	3	R	2	40.5	215.405	221.555	17.198	0.0549099	81.022	3.31662
574	C	3	R	2	91.5	215.915	222.065	17.2048	0.0654594	79.2046	2.58639
574	C	3	R	2	140.5	216.405	222.555	17.2422	0.0656774	74.6419	1.09075
574	C	3	R	3	36.5	216.865	223.015	17.2825	0.0599027	75.4088	1.16198
574	C	3	R	3	90.5	217.405	223.555	17.327	0.0748563	61.3549	1.18803
574	C	3	R	3	140.5	217.905	224.055	17.3556	0.0468116	85.1656	1.88115
574	C	3	R	4	40.5	218.405	224.555	17.3761	0.0625464	84.2827	2.61141
574	C	3	R	4	72.5	218.725	224.875	17.3892	0.0515494	79.3555	2.6965
574	C	4	R	1	40.5	223.405	229.555	17.5616	0.0548436	83.6038	1.55119
574	C	4	R	1	90.5	223.905	230.055	17.5978	0.0452133	85.5186	1.1093
574	C	4	R	1	143.5	224.435	230.585	17.6411	0.0447473	87.6233	1.43523
574	C	4	R	2	37.5	224.875	231.025	17.6796	0.0704935	86.0515	1.5235
574	C	4	R	2	88.5	225.385	231.535	17.7129	0.0628601	79.4407	1.61157
574	C	4	R	2	138.5	225.885	232.035	17.7454	0.0740346	81.0388	1.35957
574	C	4	R	3	40.5	226.405	232.555	17.7821	0.0571895	85.0789	1.52081
574	C	5	R	1	39.5	232.895	239.045	18.2139	0.0415623	91.0916	2.08686
574	C	5	R	1	90.5	233.405	239.555	18.2388	0.0506156	85.1796	2.51107
574	C	5	R	1	142.5	233.925	240.075	18.261	0.0608119	88.1184	2.50166
574	C	5	R	2	39.5	234.395	240.545	18.2811	0.0478951	84.0668	2.4801
574	C	5	R	2	92.5	234.925	241.075	18.305	0.036852	84.7951	2.58898
574	C	5	R	2	140.5	235.405	241.555	18.3246	0.040725	83.9417	2.32926
574	C	5	R	3	37.5	235.875	242.025	18.3505	0.0403331	85.2335	2.45646
574	C	5	R	3	90.5	236.405	242.555	18.3733	0.0430213	85.3328	2.87688
574	C	5	R	3	140.5	236.905	243.055	18.3938	0.0316832	83.1662	3.48561
574	C	5	R	4	39.5	237.395	243.545	18.4113	0.0454243	84.9884
574	C	5	R	4	90.5	237.905	244.055	End of spliced section	0.0528827	88.6318
574	C	5	R	4	138.5	238.385	244.535	For earlier ages	0.047552	87.0264
574	C	5	R	5	20.5	238.705	244.855	see Piela et al. (2012)	0.0663812	87.5198
574	C	6	R	1	38.5	242.385	248.535		0.0502938	91.9757
574	C	6	R	1	90.5	242.905	249.055		0.0490573	92.8433
574	C	6	R	1	140.5	243.405	249.555		0.0556713	90.5104
574	C	6	R	2	38.5	243.885	250.035		0.0507497	93.4334
574	C	6	R	2	91.5	244.415	250.565		0.0490661	92.8816
574	C	6	R	2	139.5	244.895	251.045		0.0575813	92.2665
574	C	6	R	3	39.5	245.395	251.545		0.0443642	93.9021
574	C	6	R	3	92.5	245.925	252.075		0.0407565	92.2456
574	C	6	R	3	137.5	246.375	252.525		0.0502964	88.2217
574	C	6	R	4	40.5	246.905	253.055		0.0641903	85.7453
574	C	6	R	4	90.5	247.405	253.555		0.053095	88.8417
574	C	6	R	4	140.5	247.905	254.055		0.0506407	89.399
574	C	6	R	5	34.5	248.345	254.495		0.0654602	89.7181
574	C	7	R	1	40.5	251.905	258.055		0.0406919	91.6665
574	C	7	R	1	90.5	252.405	258.555		0.0525408	91.9697
574	C	7	R	1	140.5	252.905	259.055		0.0504422	89.0949
574	C	7	R	2	40.5	253.405	259.555		0.0460064	86.4775
574	C	7	R	2	90.5	253.905	260.055		0.0397886	91.9163
574	C	7	R	2	140.5	254.405	260.555		0.0435089	86.6392
574	C	7	R	3	40.5	254.905	261.055		0.042505	86.4998
574	C	7	R	3	90.5	255.405	261.555		0.0397102	87.7499
574	C	7	R	3	140.5	255.905	262.055		0.0483575	87.0134
574	C	7	R	4	40.5	256.405	262.555		0.0531359	88.7553
574	C	7	R	4	90.5	256.905	263.055		0.0348051	88.4668
574	C	7	R	4	140.5	257.405	263.555		0.035641	89.4366
574	C	7	R	5	40.5	257.905	264.055		0.0418417	88.831
574	C	7	R	5	90.5	258.405	264.555		0.0480245	89.0437
574	C	7	R	5	140.5	258.905	265.055		0.0559524	87.2287
574	C	7	R	6	40.5	259.405	265.555		0.042641	90.5179
574	C	7	R	6	90.5	259.905	266.055		0.0518084	89.9181
574	C	7	R	6	140.5	260.405	266.555		0.0520366	88.6627
574	C	7	R	7	40.5	260.905	267.055		0.0554348	90.4305
574	C	8	R	1	40.5	261.405	267.555		0.0430138	89.7122
574	C	8	R	1	90.5	261.905	268.055		0.0540088	87.207
574	C	8	R	1	140.5	262.405	268.555		0.0521214	85.3253
574	C	8	R	2	40.5	262.905	269.055		0.0493781	85.3684
574	C	8	R	2	90.5	263.405	269.555		0.0390498	86.958
574	C	8	R	2	140.5	263.905	270.055		0.042896	87.8869
574	C	8	R	3	40.5	264.405	270.555		0.0395151	85.7341
574	C	8	R	3	90.5	264.905	271.055		0.0440466	87.8513
574	C	8	R	3	140.5	265.405	271.555		0.0432594	92.4885
574	C	8	R	4	30.5	265.805	271.955		0.0574103	89.0324
574	C	9	R	1	40.5	270.905	277.055		0.0429213	89.3741
574	C	9	R	1	90.5	271.405	277.555		0.0466644	88.8756
574	C	9	R	1	140.5	271.905	278.055		0.0473432	87.5233
574	C	9	R	2	40.5	272.405	278.555		0.0403591	87.7285
574	C	9	R	2	90.5	272.905	279.055		0.028903	84.8447
574	C	9	R	2	140.5	273.405	279.555		0.0467319	84.8271
574	C	9	R	3	40.5	273.905	280.055		0.0481719	85.0985
574	C	9	R	3	90.5	274.405	280.555		0.039557	85.0552
574	C	10	R	1	40.5	280.405	286.555		0.0527458	86.6303
574	C	10	R	1	90.5	280.905	287.055		0.0536776	85.2528
574	C	10	R	1	140.5	281.405	287.555		0.0575663	84.1594
574	C	10	R	2	40.5	281.905	288.055		0.0527183	81.5874
574	C	10	R	2	90.5	282.405	288.555		0.0570302	85.1211
574	C	10	R	2	140.5	282.905	289.055		0.0616613	83.3473
574	C	10	R	3	40.5	283.405	289.555		0.0445416	83.7217
574	C	10	R	3	90.5	283.905	290.055		0.0377968	86.3184
574	C	10	R	3	140.5	284.405	290.555		0.0439317	85.1408
574	C	10	R	4	40.5	284.905	291.055		0.044331	88.8357
574	C	10	R	4	90.5	285.405	291.555		0.0527101	86.145
574	C	10	R	4	140.5	285.905	292.055		0.044486	80.9451
574	C	10	R	5	40.5	286.405	292.555		0.0379161	83.6188
574	C	10	R	5	90.5	286.905	293.055		0.0381827	83.6409
574	C	10	R	5	140.5	287.405	293.555		0.0409977	81.2346
574	C	10	R	6	40.5	287.905	294.055		0.0335312	89.2436
574	C	10	R	6	90.5	288.405	294.555		0.0333333	90.7063
574	C	10	R	6	140.5	288.905	295.055		0.0346878	90.6215
574	C	10	R	7	40.5	289.405	295.555		0.0608826	89.3483
574	C	11	R	1	40.5	289.905	296.055		0.0563692	84.1184
574	C	11	R	1	90.5	290.405	296.555		0.0438127	91.8845
574	C	11	R	1	140.5	290.905	297.055		0.056468	85.9522
574	C	11	R	2	40.5	291.405	297.555		0.0333701	90.8021
574	C	11	R	2	90.5	291.905	298.055		0.0391053	91.5867
574	C	11	R	2	140.5	292.405	298.555		0.0414201	86.5138
574	C	11	R	3	40.5	292.905	299.055		0.0419202	85.8585
574	C	11	R	3	90.5	293.405	299.555		0.0416416	88.1478
574	C	11	R	3	140.5	293.905	300.055		0.0406381	92.3748
574	C	12	R	1	40.5	299.405	305.555		0.0328906	90.0797
574	C	12	R	1	90.5	299.905	306.055		0.038039	90.2032
574	C	12	R	1	140.5	300.405	306.555		0.0383921	89.2346
574	C	12	R	2	40.5	300.905	307.055		0.0455401	90.2882
574	C	12	R	2	90.5	301.405	307.555		0.0407407	90.3773
574	C	12	R	2	140.5	301.905	308.055		0.0432781	89.2058
574	C	12	R	3	40.5	302.405	308.555		0.0353451	91.7925
574	C	12	R	3	90.5	302.905	309.055		0.0234155	91.5291
574	C	12	R	3	140.5	303.405	309.555		0.0407714	92.2511
574	C	12	R	4	40.5	303.905	310.055		0.0437409	77.8722
574	C	12	R	4	90.5	304.405	310.555		0.037092	90.4196
574	C	12	R	4	140.5	304.905	311.055		0.0459834	90.8023
574	C	12	R	5	40.5	305.405	311.555		0.0387865	88.9811
574	C	12	R	5	90.5	305.905	312.055		0.0425575	89.6849
574	C	12	R	5	140.5	306.405	312.555		0.0350182	91.3459
574	C	12	R	6	40.5	306.905	313.055		0.0421647	93.57
574	C	12	R	6	90.5	307.405	313.555		0.0401327	92.4459
574	C	12	R	6	140.5	307.905	314.055		0.033268	94.3421
574	C	12	R	7	33.5	308.335	314.485		0.0513889	92.6993
574	C	13	R	1	40.5	308.905	315.055		0.0481928	91.3269
574	C	13	R	1	90.5	309.405	315.555		0.0490537	90.6608
574	C	13	R	1	140.5	309.905	316.055		0.0410064	93.7154
574	C	13	R	2	40.5	310.405	316.555		0.0423733	92.9463
574	C	13	R	2	90.5	310.905	317.055		0.0419453	92.1409
574	C	13	R	2	140.5	311.405	317.555		0.0445576	92.5244
574	C	13	R	3	40.5	311.905	318.055		0.02527	93.8279
574	C	13	R	3	90.5	312.405	318.555		0.0532345	92.9435
574	C	13	R	3	140.5	312.905	319.055		0.0379009	91.6941
574	C	13	R	4	40.5	313.405	319.555		0.0398671	92.9938
574	C	13	R	4	90.5	313.905	320.055		0.0418129	92.7099
574	C	13	R	4	137.5	314.375	320.525		0.0565466	91.301
574	C	13	R	5	35.5	314.855	321.005		0.0604088	83.6273
574	C	14	R	1	40.5	318.405	324.555		0.0560971	92.2763
574	C	14	R	1	90.5	318.905	325.055		0.0463823	86.2441
574	C	14	R	1	140.5	319.405	325.555		0.0692981	88.3255
574	C	14	R	2	40.5	319.905	326.055		0.0387728	84.2912
574	C	14	R	2	90.5	320.405	326.555		0.0387793	89.4617
574	C	14	R	2	140.5	320.905	327.055		0.0550964	83.5877
574	C	14	R	3	35.5	321.355	327.505		0.0562743	90.7965
574	C	15	R	1	40.5	327.905	334.055		0.0467849	90.9382
574	C	15	R	1	94.5	328.445	334.595		0.0295539	93.3015
574	C	15	R	1	140.5	328.905	335.055		0.0525002	90.8198
574	C	15	R	2	42.5	329.425	335.575		0.0485551	90.4327
574	C	15	R	2	90.5	329.905	336.055		0.0434866	91.0161
574	C	15	R	2	140.5	330.405	336.555		0.0470293	90.4152
574	C	15	R	3	40.5	330.905	337.055		0.0451056	90.9347
574	C	15	R	3	90.5	331.405	337.555		0.0446474	89.4256
574	C	15	R	3	140.5	331.905	338.055		0.0489819	88.2097
574	C	15	R	4	40.5	332.405	338.555		0.0425571	91.2439
574	C	15	R	4	90.5	332.905	339.055		0.0422305	89.9564
574	C	15	R	4	140.5	333.405	339.555		0.0451359	91.4604
574	C	15	R	5	50.5	334.005	340.155		0.0470022	90.78
574	C	15	R	5	90.5	334.405	340.555		0.0423588	90.7707
574	C	15	R	5	140.5	334.905	341.055		0.044101	92.2066
574	C	15	R	6	40.5	335.405	341.555		0.0444289	92.0649
574	C	15	R	6	105.5	336.055	342.205		0.0251777	92.1588
574	C	15	R	6	140.5	336.405	342.555		0.0454023	89.93
574	C	15	R	7	30.5	336.805	342.955		0.0467996	91.2846
574	C	16	R	1	40.5	337.405	343.555		0.0468714	91.7561
574	C	16	R	1	90.5	337.905	344.055		0.0474539	88.2237
574	C	16	R	1	140.5	338.405	344.555		0.0447787	88.7465
574	C	16	R	2	40.5	338.905	345.055		0.044604	87.2591
574	C	16	R	2	90.5	339.405	345.555		0.0423446	86.1557
574	C	16	R	2	137.5	339.875	346.025		0.0297872	86.7819
574	C	16	R	3	40.5	340.405	346.555		0.042029	80.7331
574	C	16	R	3	90.5	340.905	347.055		0.0350342	85.0936
574	C	16	R	3	140.5	341.405	347.555		0.0315475	81.8085
574	C	16	R	4	34.5	341.845	347.995		0.0458333	83.8497
574	C	17	R	1	40.5	346.905	353.055		0.0485347	88.5221
574	C	17	R	1	90.5	347.405	353.555		0.0383804	91.3557
574	C	17	R	1	140.5	347.905	354.055		0.0393362	90.3103
574	C	17	R	2	40.5	348.405	354.555		0.0387679	88.1234
574	C	17	R	2	91	348.91	355.06		0.0355413	88.1128
574	C	17	R	2	140.5	349.405	355.555		0.0402875	87.36
574	C	17	R	3	40.5	349.905	356.055		0.0348061	86.2378
574	C	17	R	3	90.5	350.405	356.555		0.0318766	86.8848
574	C	17	R	3	140.5	350.905	357.055		0.0411979	85.5689
574	C	17	R	4	40.5	351.405	357.555		0.0416586	82.2265
574	C	17	R	4	90.5	351.905	358.055		0.0345974	84.5813
574	C	17	R	4	140.5	352.405	358.555		0.0300216	85.6105
574	C	17	R	5	40.5	352.905	359.055		0.0363747	86.28
574	C	17	R	5	90.5	353.405	359.555		0.0353862	88.7794
