# Supplementary material for: Variations in the Biological Pump through the Miocene: Evidence from organic carbon burial in Pacific Ocean sediments
Source: Copernicus journal article supplement (doi:10.5194/cp-2024-34), 2024-05-27
Supplement: Supplementary file 31 [file SuppTable_S5_574A XRF data.xlsx]

## Sheet: SuppTable S5_U574A XRF data
Site	Hole	Core	Section	Interval (cm)	Depth (m CSF)	Depth (m_CCSF)	Al_Area	Al2O3_NMS%	50kV_Ba_Area	BaSO4_NMS%	Ca_Area	CaCO3_NMS%	Fe_Area	Fe2O3_NMS%	K_Area	K2O_NMS%	Mn_Area	MnO_NMS%	Si_Area	SiO2_NMS%	Ti_Area	TiO2_NMS%
574	A	1	1	2	6.02	6.02	199	0.656813	839	0.109725	927517	91.1564	8861	0.23256	-1284	0	1911	0.149591	9670	7.68001	434	0.0148802
574	A	1	1	4	6.04	6.04	556	0.696716	2413	0.11981	2404984	89.7367	26081	0.259878	5798	0.207616	5247	0.155937	29139	8.78623	2849	0.0370854
574	A	1	1	6	6.06	6.06	317	0.40732	2527	0.128658	2338384	89.4682	27387	0.279824	6136	0.2253	7150	0.21789	29871	9.23576	2773	0.0370131
574	A	1	1	8	6.08	6.08	633	0.779286	2750	0.134147	2444078	89.5953	28442	0.278431	4974	0.174984	6185	0.180588	29776	8.82076	2856	0.0365242
574	A	1	1	10	6.1	6.1	439	0.536065	3343	0.16175	2448955	89.0452	32485	0.315427	6461	0.225451	7000	0.202725	32252	9.47667	2896	0.0367351
574	A	1	1	12	6.12	6.12	581	0.670085	3094	0.141394	2603640	89.4153	32290	0.296132	6629	0.218475	8887	0.243089	32347	8.97707	3210	0.0384582
574	A	1	1	14	6.14	6.14	690	0.762672	3323	0.145537	2689304	88.5127	36649	0.322118	7643	0.241409	11544	0.302622	36357	9.66993	3748	0.0430346
574	A	1	1	16	6.16	6.16	1097	1.22986	3855	0.17125	2528954	84.4245	48053	0.428386	11451	0.366855	15750	0.418781	47834	12.9043	4817	0.0560992
574	A	1	1	18	6.18	6.18	1925	2.14055	4959	0.218497	2358614	78.0961	69697	0.616273	17601	0.559285	21386	0.564002	66303	17.7409	5580	0.0644554
574	A	2	1	8	6.38	6.38	2642	4.02224	6032	0.363875	1413661	64.0852	107070	1.29619	22907	0.996562	6142	0.221769	78876	28.8953	7516	0.118864
574	A	2	1	10	6.4	6.4	2587	4.36853	5974	0.399724	1247237	62.7141	106903	1.43547	22117	1.06725	18339	0.734464	71748	29.1538	7219	0.126633
574	A	2	1	12	6.42	6.42	2832	5.00704	6430	0.450458	1095493	57.6732	114406	1.60842	24302	1.22781	17605	0.738209	77887	33.1359	8654	0.15894
574	A	2	1	14	6.44	6.44	3460	8.1628	7384	0.690256	532187	37.3856	176266	3.30671	31055	2.09361	17419	0.974635	82980	47.1068	11411	0.279651
574	A	2	1	18	6.48	6.48	3779	6.00801	6676	0.420558	1103122	52.2221	158576	2.00473	32036	1.45543	13290	0.501112	97264	37.2094	10819	0.178678
574	A	2	1	20	6.5	6.5	3546	5.73158	7574	0.485084	1092224	52.5684	160596	2.06412	31560	1.45772	16297	0.62474	94839	36.8867	10823	0.181724
574	A	2	1	22	6.52	6.52	3025	4.6148	6956	0.420477	1336420	60.7082	123869	1.50264	27307	1.19042	24998	0.904458	83156	30.5258	8406	0.133213
574	A	2	1	26	6.56	6.56	3794	6.80048	9648	0.685228	800206	42.7092	185729	2.6472	36432	1.86606	26872	1.14235	101801	43.9077	12986	0.241795
574	A	2	1	28	6.58	6.58	4402	7.9211	9586	0.683484	763700	40.9199	189618	2.71318	37309	1.91845	28364	1.21048	102496	44.3802	13545	0.253189
574	A	2	1	30	6.6	6.6	4100	7.66647	9000	0.666822	732896	40.8066	199779	2.97047	36597	1.9555	19768	0.876658	99584	44.8072	12882	0.250222
574	A	2	1	32	6.62	6.62	3523	7.49213	7354	0.619686	660482	41.8245	168704	2.85287	31999	1.9446	11702	0.590212	86806	44.4211	11542	0.254978
574	A	2	1	36	6.66	6.66	5323	9.63234	12705	0.910972	527790	28.4389	243020	3.49688	45447	2.35007	44037	1.88994	121588	52.9435	17949	0.3374
574	A	2	1	38	6.68	6.68	4188	8.42419	7918	0.631091	584224	34.9927	191752	3.06708	38106	2.19036	6946	0.331369	103492	50.0927	12944	0.27047
574	A	2	1	40	6.7	6.7	5230	9.54188	12433	0.898802	531362	28.8669	246157	3.57115	45796	2.38759	38284	1.65655	120086	52.7195	18869	0.357611
574	A	2	1	42	6.72	6.72	5153	9.61083	12819	0.94735	503057	27.938	244419	3.62493	47613	2.53762	31609	1.39819	119462	53.6139	16994	0.32925
574	A	2	1	44	6.74	6.74	4601	8.28277	9731	0.694123	706470	37.8699	221106	3.1651	40591	2.08811	25218	1.07669	107462	46.5506	14583	0.272709
574	A	2	1	46	6.76	6.76	5624	11.2456	9936	0.787233	301526	17.953	274133	4.35875	51542	2.94509	21044	0.997976	127438	61.3171	19027	0.395218
574	A	2	1	48	6.78	6.78	5703	11.3122	10749	0.844825	309433	18.2762	265993	4.19544	51240	2.90438	20421	0.960674	128046	61.1162	18931	0.390074
574	A	2	1	50	6.8	6.8	5393	11.1938	11534	0.948601	323765	20.0104	244653	4.03797	47531	2.8192	22880	1.12631	119070	59.4699	18267	0.393863
574	A	2	1	52	6.82	6.82	5143	9.36989	11266	0.813286	554084	30.0587	231696	3.35661	45101	2.34804	26963	1.16504	119908	52.5669	16986	0.321469
574	A	2	1	54	6.84	6.84	5082	9.4851	10187	0.753371	537744	29.8854	225825	3.35153	43808	2.33647	36325	1.60793	116390	52.272	15892	0.308117
574	A	2	1	56	6.86	6.86	4711	8.26027	11646	0.809121	726099	37.91	203984	2.84408	41735	2.09114	26015	1.08183	110719	46.7143	15879	0.289224
574	A	2	1	58	6.88	6.88	3680	5.40639	8736	0.508543	1226694	53.6627	151312	1.76765	35185	1.47713	18266	0.636441	102873	36.367	11412	0.174161
574	A	2	1	60	6.9	6.9	3899	5.71209	7640	0.443497	1222977	53.3503	155851	1.81558	34114	1.42815	11152	0.387481	104088	36.6935	11135	0.169458
574	A	2	1	62	6.92	6.92	4111	6.5066	9009	0.564987	1052877	49.6205	167275	2.10524	36253	1.63965	17556	0.659004	101640	38.7095	11828	0.194468
574	A	2	1	64	6.94	6.94	2790	3.6279	6372	0.328309	1724011	66.7526	114673	1.1857	25780	0.957932	16862	0.520015	84748	26.5172	8172	0.110385
574	A	2	1	66	6.96	6.96	3729	5.89197	9529	0.596583	1108082	52.1335	165451	2.07875	34417	1.55397	20187	0.756476	96779	36.7956	11771	0.193202
574	A	2	1	68	6.98	6.98	1798	2.25134	4789	0.237603	2023464	75.4438	74486	0.741635	18884	0.675687	16197	0.480996	66690	20.0936	5785	0.0752462
574	A	2	1	70	7	7	2698	3.57955	7167	0.376772	1714858	67.7471	100339	1.05857	24880	0.943271	31562	0.99313	78883	25.1835	8568	0.118085
574	A	2	1	72	7.02	7.02	3064	4.31419	8027	0.447836	1501600	62.9566	112459	1.25912	26176	1.05321	24088	0.80439	85676	29.0279	9346	0.136699
574	A	2	1	74	7.04	7.04	3207	4.66425	6142	0.353955	1432779	62.0496	107662	1.24512	26511	1.10182	4472	0.154255	86575	30.2986	8764	0.132408
574	A	2	1	76	7.06	7.06	3296	5.05406	5579	0.338973	1289687	58.8864	118598	1.44609	27576	1.20833	4713	0.171398	88744	32.7446	9432	0.15024
574	A	2	1	78	7.08	7.08	2924	4.13769	4597	0.257757	1553933	65.4772	100620	1.13222	24225	0.979591	4518	0.151629	81503	27.7524	7586	0.111512
574	A	2	1	80	7.1	7.1	3966	6.76275	6837	0.461946	928396	47.139	156555	2.12276	33853	1.64956	5028	0.203339	101060	41.4664	10962	0.194174
574	A	2	1	84	7.14	7.14	3839	6.8994	8460	0.602447	858056	45.9183	172942	2.47148	33027	1.69614	4378	0.186606	97103	41.9926	12481	0.233009
574	A	2	1	86	7.16	7.16	4375	7.45527	7298	0.49277	872569	44.2754	167287	2.26679	34414	1.6758	4400	0.177825	105936	43.4386	12293	0.217607
574	A	2	1	88	7.18	7.18	3585	5.76608	7283	0.464149	1092898	52.3417	149553	1.91272	31498	1.44769	3944	0.150447	97545	37.7523	9871	0.164923
574	A	2	1	90	7.2	7.2	4119	7.38296	8932	0.63437	789959	42.1619	184959	2.6362	36244	1.85642	3849	0.163622	104202	44.9429	11903	0.221628
574	A	2	1	92	7.22	7.22	4185	7.077	9913	0.664223	891774	44.904	174095	2.34101	35783	1.72914	4267	0.171132	105395	42.8865	12924	0.227028
574	A	2	1	94	7.24	7.24	4175	6.76562	10657	0.684292	971763	46.8909	167868	2.16313	35433	1.64081	6329	0.243244	106167	41.3988	12667	0.213233
574	A	2	1	96	7.26	7.26	4159	7.07064	9039	0.608899	912404	46.1885	170164	2.30039	34097	1.65648	4612	0.185958	102109	41.7715	12322	0.217611
574	A	2	1	98	7.28	7.28	4122	7.00064	7728	0.520059	915914	46.3193	169951	2.29518	35232	1.70989	3611	0.14545	102281	41.7995	11902	0.209981
574	A	2	1	100	7.3	7.3	3588	4.84652	6943	0.371604	1539121	61.9052	121072	1.30043	28500	1.10008	7542	0.241613	92621	30.1047	9253	0.129835
574	A	2	1	102	7.32	7.32	4856	7.51336	10317	0.632505	982542	45.2672	175787	2.16275	38234	1.69046	10145	0.372274	113220	42.1527	12992	0.208815
574	A	2	1	104	7.34	7.34	4369	6.43389	10524	0.614084	1086258	47.6323	175106	2.05049	38148	1.60533	26911	0.93989	114323	40.5109	13931	0.21311
574	A	2	1	106	7.36	7.36	4185	5.72739	9698	0.525895	1338202	54.533	156166	1.69946	33318	1.30299	20289	0.658533	107442	35.382	12009	0.170725
574	A	2	1	108	7.38	7.38	3949	5.74652	7619	0.43931	1206713	52.2876	166687	1.92878	34888	1.45076	15955	0.550643	106875	37.4232	11460	0.173234
574	A	2	1	110	7.4	7.4	4054	5.81296	8813	0.500717	1265422	54.0289	156116	1.78002	33493	1.37236	14045	0.477629	103947	35.8651	10899	0.162342
574	A	2	1	112	7.42	7.42	4398	6.74758	11267	0.684947	1043746	47.6831	178634	2.17932	36767	1.61195	15277	0.555887	109228	40.3249	13317	0.212241
574	A	2	1	114	7.44	7.44	3052	3.79019	6703	0.329838	1743046	64.4558	117754	1.16283	25925	0.920017	7074	0.208352	97131	29.0256	8320	0.107332
574	A	2	1	116	7.46	7.46	6001	9.86379	12545	0.817045	586217	28.6916	237005	3.09772	47436	2.22807	28933	1.1279	136173	53.8589	18445	0.31494
574	A	2	1	118	7.48	7.48	5659	8.87194	10214	0.634498	772757	36.0744	219105	2.73146	44279	1.98371	6715	0.249678	130410	49.1968	15815	0.25756
574	A	2	1	120	7.5	7.5	5493	8.525	9626	0.591951	770183	35.5923	211862	2.61458	45848	2.03332	6612	0.243374	134294	50.152	15354	0.247535
574	A	2	1	122	7.52	7.52	5417	8.96478	9599	0.629451	684499	33.7311	243471	3.204	46139	2.18197	5973	0.234438	127505	50.7755	16214	0.278741
574	A	2	1	124	7.54	7.54	5056	8.14468	10774	0.6877	821963	39.4272	209154	2.67915	43146	1.98613	3566	0.13624	120468	46.6966	14481	0.242323
574	A	2	1	126	7.56	7.56	5027	7.67667	9972	0.603395	994170	45.2066	189945	2.30651	39944	1.74307	4434	0.160589	114532	42.086	13694	0.217232
574	A	2	1	128	7.58	7.58	4801	6.99505	9175	0.529689	1101168	47.7738	182082	2.10955	39832	1.65841	6459	0.223193	115549	40.5109	13177	0.199437
574	A	2	1	130	7.6	7.6	4951	7.6928	10907	0.67151	970216	44.8887	186452	2.30368	40015	1.7767	7225	0.266247	112810	42.178	13780	0.222418
574	A	2	1	132	7.62	7.62	4508	7.69662	7389	0.49987	812759	41.3195	195676	2.65655	40728	1.98705	4375	0.177154	110560	45.4214	13635	0.241825
574	A	2	1	134	7.64	7.64	5149	7.48036	11939	0.687263	1067053	46.1596	189711	2.19157	41631	1.72829	8659	0.298348	117965	41.2382	14338	0.21638
574	A	2	1	136	7.66	7.66	2121	2.40034	5657	0.253673	2270076	76.4978	93778	0.843911	19917	0.644104	16017	0.429901	69212	18.8478	7014	0.082457
574	A	2	1	138	7.68	7.68	4092	6.49388	10915	0.686353	1063018	50.2326	172653	2.17875	34280	1.55457	7070	0.266099	100533	38.3905	11962	0.197198
574	A	2	1	140	7.7	7.7	1260	1.25925	3781	0.149728	2889502	85.9885	50336	0.400021	11128	0.317803	8366	0.198296	48417	11.6435	4126	0.0428351
574	A	2	1	142	7.72	7.72	3591	4.50429	6409	0.318534	1727717	64.5298	131908	1.31567	28598	1.02505	7837	0.23314	92572	27.9407	10196	0.132853
574	A	2	1	144	7.74	7.74	1932	2.03636	5298	0.221266	2535357	79.5724	78321	0.656431	17590	0.529801	10590	0.264727	65663	16.6538	5951	0.0651578
574	A	2	1	146	7.76	7.76	1973	3.14056	4306	0.271587	1546025	73.2779	66779	0.845247	16117	0.733102	9724	0.367097	55525	21.2674	5869	0.0970451
574	A	2	1	148	7.78	7.78	2244	3.53096	4348	0.27109	1511513	70.8204	80884	1.01204	18913	0.850414	7266	0.271157	61149	23.1529	5573	0.0910937
574	A	2	2	4	7.84	7.84	3115	3.79499	6524	0.314936	1925450	69.8493	98833	0.957457	24433	0.85061	21730	0.627868	80203	23.512	7330	0.0927656
574	A	2	2	6	7.86	7.86	2991	3.32492	5981	0.263447	2187577	72.411	90735	0.802054	22735	0.722204	31198	0.822521	80646	21.5722	7069	0.0816305
574	A	2	2	8	7.88	7.88	2832	3.1652	5592	0.247646	2156076	71.7545	91113	0.809753	23625	0.754536	22048	0.58443	84080	22.6124	6161	0.0715301
574	A	2	2	10	7.9	7.9	2207	2.51515	5980	0.270034	2179775	73.9691	90869	0.823458	21663	0.705474	30175	0.815576	75906	20.8154	7250	0.0858281
574	A	2	2	12	7.92	7.92	2341	2.74574	6026	0.280054	2117720	73.9611	86059	0.802635	20725	0.694629	28501	0.792818	73152	20.6458	6343	0.0772827
574	A	2	2	14	7.94	7.94	2903	3.04942	6454	0.26863	2357109	73.7271	87445	0.730415	21236	0.637446	29187	0.727136	82244	20.7884	6549	0.071462
574	A	2	2	16	7.96	7.96	2750	2.90445	6261	0.262018	2381121	74.8842	86655	0.727762	20615	0.622179	23909	0.598892	78396	19.9238	6993	0.0767229
574	A	2	2	18	7.98	7.98	2835	3.02881	6873	0.290952	2310160	73.4917	97839	0.83118	23317	0.711856	31159	0.789511	80793	20.7701	7739	0.0858882
574	A	2	2	20	8	8	2557	2.62807	6175	0.251477	2451886	75.0383	86830	0.709643	20338	0.59733	16676	0.406493	82077	20.299	6529	0.069708
574	A	2	2	22	8.02	8.02	3051	3.29972	7122	0.305206	2214904	71.3291	102916	0.885079	25381	0.784412	30725	0.788103	86552	22.5247	7445	0.083643
574	A	2	2	24	8.04	8.04	4336	4.98011	10208	0.464564	1804338	61.7085	138727	1.26699	33389	1.09586	23222	0.632565	107530	29.7185	11147	0.132996
574	A	2	2	26	8.06	8.06	4757	6.44846	12641	0.678984	1210481	48.8605	187746	2.02375	39707	1.53812	19682	0.632772	121430	39.6091	14795	0.208337
574	A	2	2	28	8.08	8.08	3685	4.57686	9060	0.445876	1714251	63.3989	124506	1.22966	30640	1.08747	17983	0.529722	95682	28.5961	10498	0.135446
574	A	2	2	30	8.1	8.1	4665	6.0157	11135	0.568958	1412408	54.234	154382	1.58305	36769	1.35493	32057	0.980423	113106	35.0968	12402	0.166133
574	A	2	2	32	8.12	8.12	4242	5.92327	10876	0.601749	1324299	55.0622	150643	1.67264	33621	1.34153	22538	0.746383	102638	34.4862	11444	0.165996
574	A	2	2	34	8.14	8.14	4768	5.79468	9761	0.470049	1585001	57.3587	145025	1.40152	35744	1.24136	18018	0.519344	113093	33.0731	11185	0.141208
574	A	2	2	36	8.16	8.16	4443	5.98387	8099	0.432208	1350841	54.1735	160162	1.71526	36969	1.4228	8541	0.272816	110576	35.8355	11730	0.164109
574	A	2	2	38	8.18	8.18	4561	6.90033	15760	0.94476	1027957	46.3086	180256	2.16852	38548	1.66653	48465	1.73898	109972	40.0349	15108	0.237436
574	A	2	2	40	8.2	8.2	4646	7.03525	13694	0.821648	1008584	45.4767	179610	2.16269	38210	1.6534	46614	1.67406	112413	40.9603	13725	0.215895
574	A	2	2	42	8.22	8.22	4768	6.57125	14478	0.790634	1140446	46.8018	167131	1.83161	37958	1.49491	90027	2.94266	118686	39.3602	14450	0.206875
574	A	2	2	44	8.24	8.24	4216	5.9965	11597	0.653579	1226912	51.9622	152139	1.72069	34250	1.39206	28931	0.975925	108438	37.1129	12597	0.18612
574	A	2	2	46	8.26	8.26	3963	5.73069	11497	0.658753	1245360	53.6234	150260	1.72779	33311	1.37648	30973	1.06224	102420	35.6381	12156	0.182601
574	A	2	2	48	8.28	8.28	3551	5.34341	10071	0.600476	1251035	56.055	139090	1.66428	30400	1.3072	24973	0.891239	93801	33.9642	11143	0.174181
574	A	2	2	50	8.3	8.3	5593	8.69965	11518	0.709887	837622	38.7955	182954	2.26289	40888	1.81741	16205	0.597808	125257	46.8819	14538	0.234904
574	A	2	2	54	8.34	8.34	4361	6.85645	11016	0.686267	979333	45.848	170438	2.13081	37879	1.70182	24382	0.909156	110114	41.6584	12800	0.209051
574	A	2	2	56	8.36	8.36	5218	8.50227	12752	0.823312	842351	40.8696	183546	2.37815	38729	1.8033	30402	1.17487	112726	44.1979	14804	0.250576
574	A	2	2	58	8.38	8.38	4903	7.43497	11726	0.704567	958736	43.2906	182358	2.1989	39495	1.71143	32054	1.1528	118613	43.2809	14339	0.225874
574	A	2	2	62	8.42	8.42	3756	5.63751	11615	0.690775	1209358	54.0497	137688	1.64332	30321	1.30049	29621	1.05443	98152	35.4493	11189	0.174455
574	A	2	2	64	8.44	8.44	3377	4.81924	9137	0.516662	1422095	60.43	122552	1.39069	27041	1.10273	20976	0.709946	89931	30.8819	10041	0.148852
574	A	2	2	66	8.46	8.46	4039	6.25623	10532	0.646405	1105184	50.9742	156471	1.92724	33366	1.47687	19408	0.712976	101463	37.8175	11722	0.188612
574	A	2	2	68	8.48	8.48	3281	4.10449	8865	0.439427	1742623	64.9132	111096	1.10513	25534	0.912792	23246	0.689694	92066	27.714	9335	0.12131
574	A	2	2	70	8.5	8.5	2645	3.03615	5965	0.271309	2152790	73.5828	78916	0.720322	19158	0.628417	23064	0.627896	76224	21.0541	6630	0.0790571
574	A	2	2	72	8.52	8.52	2274	2.73012	7099	0.33771	2019916	72.2107	81326	0.776399	20091	0.689276	31063	0.884485	77160	22.291	6437	0.0802795
574	A	2	2	74	8.54	8.54	2273	2.80413	6759	0.330397	1955651	71.8401	83820	0.822262	20837	0.734572	25831	0.755781	76213	22.6243	6903	0.088464
574	A	2	2	76	8.56	8.56	3230	4.2392	7319	0.380617	1678674	65.6031	103271	1.07776	24705	0.926545	25953	0.807838	85022	26.8509	8361	0.113991
574	A	2	2	78	8.58	8.58	3047	4.02607	8321	0.435652	1627842	64.0469	109551	1.15104	25693	0.970116	40943	1.28305	87943	27.9612	9178	0.125976
574	A	2	2	80	8.6	8.6	2452	3.4634	7785	0.435709	1589292	66.844	100368	1.1273	23035	0.92976	34139	1.14364	76295	25.9313	8506	0.124807
574	A	2	2	82	8.62	8.62	4387	6.33399	10336	0.591313	1210404	52.0375	150082	1.72307	32942	1.35913	35457	1.21414	105230	36.5591	12117	0.181733
574	A	2	2	84	8.64	8.64	3862	5.36843	8342	0.459474	1411742	58.4342	134085	1.48211	30107	1.19592	21533	0.709897	96287	32.2069	9904	0.143013
574	A	2	2	86	8.66	8.66	4778	7.37873	10759	0.658359	948401	43.6118	191559	2.35235	38519	1.69985	24500	0.89734	116189	43.1765	14030	0.225073
574	A	2	2	88	8.68	8.68	4521	6.98148	13449	0.822921	957562	44.0308	191604	2.35278	39582	1.74667	41460	1.51844	113878	42.3155	14428	0.231445
574	A	2	2	90	8.7	8.7	5123	8.36449	13709	0.886904	792856	38.5466	209272	2.717	40942	1.91023	38816	1.50308	116598	45.8092	15473	0.262434
574	A	2	2	92	8.72	8.72	5098	7.60819	11452	0.677202	960135	42.6669	188656	2.2388	39542	1.68632	39134	1.38513	121185	43.5188	14106	0.218683
574	A	2	2	96	8.76	8.76	4869	7.9173	15115	0.973869	837689	40.5599	211293	2.73203	40562	1.88476	47865	1.84591	112027	43.8335	14960	0.252696
574	A	2	2	98	8.78	8.78	5523	8.26083	15264	0.904633	903195	40.226	216602	2.57617	42762	1.82771	42753	1.5166	123467	44.4372	16146	0.250867
574	A	2	2	100	8.8	8.8	5539	7.49013	8797	0.471355	1132356	45.5951	203378	2.18688	41842	1.61685	15706	0.503708	128906	41.9448	13614	0.191238
574	A	2	2	102	8.82	8.82	4783	7.57488	14651	0.919386	845502	39.8719	212436	2.67527	40993	1.85518	42434	1.59384	118748	45.2531	15592	0.256511
574	A	2	2	104	8.84	8.84	5299	8.06372	15272	0.920858	875219	39.6584	221513	2.68043	43725	1.90139	52023	1.87755	121893	44.6341	16671	0.263532
574	A	2	2	106	8.86	8.86	5108	7.80905	13558	0.821293	928032	42.2461	188160	2.28738	38376	1.67651	38769	1.40568	118346	43.5359	13730	0.218046
574	A	2	2	108	8.88	8.88	4893	7.28506	13952	0.823094	1002792	44.4575	202344	2.39559	40038	1.70345	45369	1.60204	115840	41.5014	14989	0.231825
574	A	2	2	110	8.9	8.9	5722	8.14556	14320	0.80774	922731	39.1133	223967	2.53525	44887	1.82597	70738	2.38826	131199	44.9418	16373	0.24212
574	A	2	2	112	8.92	8.92	6285	9.0172	15277	0.868481	800669	34.2055	239721	2.73487	48315	1.98084	58661	1.99605	141723	48.9276	18079	0.269445
574	A	2	2	114	8.94	8.94	4740	7.08938	12032	0.713055	926290	41.2528	211016	2.50963	42639	1.82237	35113	1.24553	125366	45.1186	16000	0.248588
574	A	2	2	116	8.96	8.96	5169	7.90306	12335	0.74728	905025	41.2028	193912	2.35753	38969	1.70258	40360	1.46351	120717	44.4124	13279	0.210904
574	A	2	2	118	8.98	8.98	4974	7.52403	12048	0.72213	890355	40.1037	210328	2.52991	42430	1.83408	63243	2.26889	123038	44.7848	14791	0.232419
574	A	2	2	120	9	9	3965	6.63373	12582	0.834103	893056	44.4908	191950	2.55368	35809	1.71201	65061	2.58161	101765	40.9694	12930	0.22472
574	A	2	2	122	9.02	9.02	5398	7.49861	12622	0.694754	1032078	42.6911	202494	2.23678	41934	1.66462	71059	2.34111	127606	42.6546	15140	0.218476
574	A	2	2	124	9.04	9.04	4846	6.78753	11664	0.647338	1110885	46.3313	191626	2.13426	39179	1.56813	58755	1.95177	119768	40.366	14689	0.213722
574	A	2	2	126	9.06	9.06	4658	6.45189	11903	0.65328	1215944	50.1508	179822	1.98059	37131	1.46969	61183	2.0099	111268	37.0855	13779	0.19826
574	A	2	2	128	9.08	9.08	4501	6.34415	11891	0.664107	1227983	51.5387	172023	1.92804	35468	1.42857	45156	1.50951	107356	36.4114	11985	0.175482
574	A	2	2	130	9.1	9.1	4028	5.64359	10038	0.557274	1275416	53.2102	156051	1.73859	33300	1.33325	41065	1.36456	106742	35.9872	11358	0.16531
574	A	2	2	132	9.12	9.12	4608	5.94823	11356	0.580839	1363312	52.4019	161923	1.66206	36058	1.33008	55285	1.69254	116596	36.2164	12520	0.167884
574	A	2	2	134	9.14	9.14	4509	5.89455	11415	0.591291	1356205	52.7925	163862	1.70338	35916	1.34171	54442	1.68795	113876	35.8219	12275	0.166695
574	A	2	2	138	9.18	9.18	4544	5.922	9542	0.492748	1407678	54.6274	157562	1.63285	34154	1.27196	35393	1.09396	110991	34.8068	11251	0.152318
574	A	2	2	140	9.2	9.2	4579	5.81528	9674	0.486812	1436031	54.3051	155667	1.57203	34351	1.24664	37867	1.14056	115444	35.2791	11711	0.154498
574	A	2	2	142	9.22	9.22	4958	6.74283	13171	0.709757	1143450	46.3052	192873	2.08579	40979	1.59257	33752	1.08866	126118	41.2723	14361	0.202885
574	A	2	2	144	9.24	9.24	4936	6.45832	13832	0.717109	1204401	46.9238	203982	2.12227	42237	1.5792	48380	1.5013	128349	40.4095	21227	0.288511
574	A	2	3	4	9.34	9.34	2989	7.22545	8766	0.839646	531466	38.2553	133973	2.57526	26802	1.85143	63774	3.65627	77923	45.3264	10761	0.270223
574	A	2	3	6	9.36	9.36	5002	8.30249	13265	0.872424	734532	36.3038	190259	2.51116	40984	1.94392	56522	2.22504	119128	47.5801	15141	0.261065
574	A	2	3	10	9.4	9.4	5993	8.58061	16092	0.912933	852682	36.3528	220804	2.51388	48550	1.98638	63771	2.16547	137082	47.2281	17469	0.259819
574	A	2	3	12	9.42	9.42	6004	8.08966	16676	0.890301	975298	39.1294	219368	2.35032	49068	1.88924	86958	2.77878	137664	44.633	17091	0.239214
574	A	2	3	14	9.44	9.44	6062	8.39098	13453	0.737856	878569	36.2118	219231	2.41303	47898	1.89459	51268	1.68306	145411	48.4329	16399	0.2358
574	A	2	3	16	9.46	9.46	6034	8.53678	13772	0.772042	902136	38.0047	216278	2.43313	47538	1.9219	57441	1.92738	135609	46.1662	16188	0.237909
574	A	2	3	18	9.48	9.48	5749	9.54211	15574	1.02425	595743	29.4434	235737	3.11131	48367	2.29404	61886	2.43613	129812	51.8458	17570	0.302938
574	A	2	3	20	9.5	9.5	4968	6.86344	13470	0.737366	1151154	47.3555	177604	1.95109	38297	1.51191	44908	1.47143	120047	39.9078	14033	0.201391
574	A	2	3	22	9.52	9.52	5607	7.21987	16117	0.822315	1158924	44.4355	195797	2.00479	45179	1.6624	60348	1.84296	134902	41.7988	15951	0.213362
574	A	2	3	24	9.54	9.54	5848	7.3359	16501	0.820185	1150995	42.9929	200437	1.99935	46383	1.66267	53124	1.58049	143764	43.3953	16361	0.213199
574	A	2	3	26	9.56	9.56	6875	8.47872	13231	0.646556	1085886	39.8767	208955	2.04915	49963	1.76079	49481	1.44728	153412	45.5264	16735	0.214394
574	A	2	3	28	9.58	9.58	6879	7.97474	13836	0.635561	1228258	42.3992	206504	1.90364	48645	1.6115	55599	1.52867	156801	43.7408	17097	0.205893
574	A	2	3	30	9.6	9.6	6153	7.33281	13077	0.617514	1289369	45.7549	191651	1.81618	44543	1.51692	48129	1.36033	144406	41.4109	15381	0.190413
574	A	2	3	32	9.62	9.62	5968	7.64882	13444	0.682731	1129302	43.0976	202186	2.06054	44719	1.63779	51033	1.55122	139836	43.1252	14728	0.196083
574	A	2	3	34	9.64	9.64	5833	6.75676	12059	0.553495	1454696	50.176	180206	1.65989	42067	1.39248	43357	1.19114	136662	38.0926	14761	0.17762
574	A	2	3	36	9.66	9.66	5257	6.72561	13725	0.695763	1289932	49.1402	182452	1.85612	40566	1.48305	51504	1.56275	124554	38.344	14482	0.192465
574	A	2	3	38	9.68	9.68	5420	6.45281	13856	0.653646	1427941	50.6217	172721	1.63515	39171	1.33265	49889	1.40867	131699	37.7293	13431	0.166107
574	A	2	3	40	9.7	9.7	5548	6.13194	13446	0.588857	1600744	52.6818	167189	1.46938	39913	1.2606	48473	1.27062	137003	36.4366	13954	0.16021
574	A	2	3	42	9.72	9.72	4477	5.20689	12501	0.576091	1607694	55.6764	155264	1.4359	36901	1.22639	51579	1.42272	122572	34.3027	12653	0.152867
574	A	2	3	44	9.74	9.74	4749	5.87563	10759	0.527448	1422330	52.3998	153550	1.51066	35088	1.24054	42110	1.23564	124392	37.0332	13779	0.177092
574	A	2	3	46	9.76	9.76	5083	5.32633	12503	0.519132	1830422	57.1131	148276	1.2355	36244	1.08529	45292	1.1256	132627	33.4415	14100	0.153482
574	A	2	3	48	9.78	9.78	5113	5.83819	11841	0.53573	1606369	54.6166	148709	1.35022	35654	1.16335	42984	1.16403	128076	35.1898	11983	0.142134
574	A	2	3	50	9.8	9.8	4802	5.83463	11837	0.569886	1435584	51.9393	158379	1.53022	36307	1.26061	41694	1.20149	128275	37.5042	12649	0.159653
574	A	2	3	52	9.82	9.82	4851	5.24977	12419	0.532538	1800510	58.0205	142591	1.22706	34242	1.05893	43738	1.1226	125300	32.6292	14180	0.15941
574	A	2	3	56	9.86	9.86	4022	4.29377	10784	0.456176	1954288	62.1244	121422	1.03076	29936	0.913253	58324	1.47673	115101	29.568	12344	0.136893
574	A	2	3	58	9.88	9.88	4265	5.21866	11757	0.570023	1504746	54.8252	156525	1.52296	34400	1.20282	38705	1.12322	120054	35.3479	14885	0.189199
574	A	2	3	60	9.9	9.9	3727	4.02858	11668	0.499741	1916414	61.6821	121762	1.04657	29972	0.925783	54313	1.39236	116446	30.2876	12228	0.137302
574	A	2	3	62	9.92	9.92	4110	4.34608	11659	0.488509	1984832	62.4966	117433	0.987438	28311	0.855483	52917	1.32711	115463	29.3795	10859	0.119282
574	A	2	3	64	9.94	9.94	4577	5.61556	16001	0.777884	1421571	51.9347	166493	1.62432	37480	1.31405	102789	2.99099	120370	35.5367	16145	0.205769
574	A	2	3	66	9.96	9.96	5687	6.616	17047	0.785807	1384091	47.9462	181121	1.6755	41179	1.36895	122912	3.39127	135719	37.9927	18507	0.223655
574	A	2	3	68	9.98	9.98	5324	5.99781	15108	0.6744	1560591	52.3505	169163	1.51539	39154	1.26047	56420	1.50745	134712	36.5181	15031	0.175903
574	A	2	3	70	10	10	4168	4.75853	10098	0.456811	1721147	58.5114	135675	1.23171	32586	1.06311	34370	0.930637	119841	32.9228	10540	0.125002
574	A	2	3	72	10.02	10.02	3903	4.67579	11705	0.555626	1649446	58.8398	138900	1.32319	33453	1.14523	34409	0.977651	112150	32.3297	12296	0.153021
574	A	2	3	74	10.04	10.04	5197	7.13294	13663	0.743048	1142570	46.6955	184709	2.01589	38974	1.52859	13594	0.442505	124897	41.2491	13497	0.192434
574	A	2	3	76	10.06	10.06	4562	5.04081	6640	0.290716	1753031	57.6782	127656	1.12163	32316	1.02038	3447	0.0903321	130328	34.6521	9216	0.105783
574	A	2	3	78	10.08	10.08	4159	5.20906	11671	0.579207	1544415	57.5985	135662	1.35112	31191	1.11635	4908	0.145791	112361	33.8636	10486	0.13643
574	A	2	3	80	10.1	10.1	4271	5.13583	14326	0.682593	1566833	56.1023	144362	1.38038	33031	1.13502	11827	0.337296	121239	35.0809	11661	0.145662
574	A	2	3	82	10.12	10.12	4504	6.02662	10947	0.580398	1294535	51.5782	165968	1.76589	36628	1.40052	8338	0.264602	118661	38.2059	12802	0.177944
574	A	2	3	84	10.14	10.14	3645	4.41328	14621	0.701449	1735825	62.5816	134731	1.29716	30617	1.05932	22688	0.651502	100011	29.1379	12550	0.157847
574	A	2	3	86	10.16	10.16	5217	6.68732	12175	0.61838	1269014	48.4367	172790	1.76122	39923	1.46236	14897	0.452883	131004	40.4075	13038	0.173609
574	A	2	3	90	10.2	10.2	4186	4.66533	14155	0.625098	1816512	60.2834	139145	1.23315	31953	1.01764	30418	0.804024	116436	31.226	12553	0.145332
574	A	2	3	92	10.22	10.22	3677	4.10578	13222	0.584999	1936638	64.3914	124680	1.10704	29362	0.936889	34138	0.904057	103660	27.8522	10141	0.117629
574	A	2	3	94	10.24	10.24	4056	5.29018	15354	0.793504	1449326	56.2879	151458	1.57083	33790	1.25939	41684	1.28943	106198	33.33	13192	0.178736
574	A	2	3	96	10.26	10.26	3928	4.71605	14360	0.683152	1591251	56.8883	153252	1.46311	34523	1.18445	40257	1.14632	116883	33.768	12077	0.150625
574	A	2	3	98	10.28	10.28	4918	6.08428	15530	0.761285	1410647	51.9656	153624	1.51127	35994	1.27248	42146	1.23661	124312	37.0067	12593	0.161838
574	A	2	3	100	10.3	10.3	3141	3.86428	11931	0.581611	1767092	64.7346	117761	1.15204	27607	0.970555	28703	0.837497	93659	27.7266	10394	0.132835
574	A	2	3	102	10.32	10.32	2957	3.52375	8665	0.409145	1984929	70.4329	96168	0.911272	22655	0.771468	16718	0.472491	81580	23.3929	6956	0.0861079
574	A	2	3	104	10.34	10.34	4099	4.62573	13066	0.584253	1834697	61.6515	124412	1.11642	29501	0.951349	25193	0.674277	111487	30.2743	10423	0.122187
574	A	2	3	106	10.36	10.36	3742	4.46702	13467	0.637002	1691673	60.1323	136990	1.30037	31081	1.06025	16298	0.461428	110733	31.8081	10768	0.13353
574	A	2	3	108	10.38	10.38	2997	3.10625	9379	0.385178	2273000	70.1497	99234	0.817851	24499	0.725602	11817	0.290477	98015	24.4449	7431	0.0800067
574	A	2	3	112	10.42	10.42	3691	4.0774	13635	0.596829	1972303	64.8769	108743	0.955223	25881	0.816998	23844	0.624704	105053	27.9251	11056	0.126872
574	A	2	3	114	10.44	10.44	3667	3.95449	13961	0.596557	2012927	64.6376	116017	0.994868	26710	0.823103	41351	1.0576	107192	27.8156	10728	0.120179
574	A	2	3	116	10.46	10.46	3035	3.11299	9447	0.383945	2301465	70.2912	93705	0.764269	22643	0.663673	30482	0.741513	97076	23.9595	7781	0.0829058
574	A	2	3	118	10.48	10.48	3411	3.68697	12928	0.5537	2048208	65.9233	106961	0.919343	25789	0.796568	50384	1.29163	102738	26.7218	9499	0.106659
574	A	2	3	120	10.5	10.5	2451	3.12505	10629	0.536985	1771361	67.2509	102156	1.03572	22529	0.820836	28719	0.868439	85559	26.2498	8474	0.112236
574	A	2	3	122	10.52	10.52	4190	4.8897	15689	0.72547	1641331	57.035	132232	1.22707	31629	1.05476	61282	1.69612	118302	33.2206	12479	0.151279
574	A	2	3	124	10.54	10.54	3642	4.32558	15063	0.708878	1694624	59.9315	134778	1.27288	29990	1.01784	53666	1.51168	108737	31.0763	12597	0.155418
574	A	2	3	126	10.56	10.56	3418	4.23817	13924	0.68411	1747562	64.5232	107604	1.06096	23107	0.818749	31974	0.940285	92480	27.5931	10973	0.141339
574	A	2	3	128	10.58	10.58	3537	4.21683	16235	0.766935	1690143	60	120167	1.1392	27073	0.922333	47483	1.34259	109683	31.4657	11822	0.14641
574	A	2	3	130	10.6	10.6	3587	4.31238	13443	0.640379	1722838	61.6747	121505	1.16157	27135	0.932215	55544	1.58372	102196	29.5642	10477	0.130844
574	A	2	3	132	10.62	10.62	3824	4.5754	15616	0.740348	1655381	58.9774	128245	1.22016	28907	0.988358	52107	1.47864	110722	31.878	11399	0.14168
574	A	2	3	134	10.64	10.64	4729	5.58656	13431	0.628693	1564683	55.04	146612	1.37724	33132	1.11847	24373	0.682872	124626	35.4266	11374	0.139578
574	A	2	3	136	10.66	10.66	3034	3.54501	14281	0.661174	1855114	64.543	118516	1.10114	26070	0.870448	29178	0.808561	100769	28.3319	11436	0.138805
574	A	2	3	138	10.68	10.68	3588	4.44311	12797	0.627911	1623382	59.8594	127165	1.25218	28535	1.00975	38150	1.12043	105910	31.5586	9996	0.128585
574	A	2	3	140	10.7	10.7	3379	3.98561	11488	0.536917	1788028	62.7998	113974	1.069	26719	0.900591	28891	0.808212	104974	29.7945	8602	0.105399
574	A	2	3	142	10.72	10.72	3751	4.45147	11373	0.534795	1777228	62.8025	110410	1.04191	25417	0.861948	29046	0.81752	102901	29.3848	8525	0.105095
574	A	2	3	144	10.74	10.74	3101	4.32247	10640	0.587662	1470208	61.022	106765	1.18338	25297	1.00763	33206	1.09775	91387	30.6522	8765	0.126915
574	A	2	4	18	10.98	10.98	2673	3.6692	8364	0.454928	1585976	64.8256	99470	1.08575	20652	0.810094	16277	0.529911	86351	28.5225	7158	0.102069
574	A	2	4	20	11	11	3590	3.83505	11278	0.47738	1982772	63.0705	120559	1.0241	28047	0.856177	17552	0.444692	117426	30.1847	9674	0.107353
574	A	2	4	22	11.02	11.02	3171	3.64665	11447	0.521609	1908323	65.3471	111885	1.02314	24109	0.792278	24975	0.681176	100763	27.8834	8757	0.104612
574	A	2	4	24	11.04	11.04	2996	3.11312	9588	0.394764	2236725	69.2061	95749	0.791139	22211	0.659513	25439	0.626917	100534	25.137	6619	0.0714458
574	A	2	4	40	11.2	11.2	2475	2.45198	9724	0.381717	2527728	74.5673	80177	0.631619	17524	0.496107	37140	0.872648	86129	20.5323	6442	0.0662967
574	A	2	4	42	11.22	11.22	2504	2.52279	9304	0.371426	2503457	75.1041	79517	0.637046	17425	0.501672	37738	0.90174	82085	19.9002	5833	0.0610476
574	A	2	4	46	11.26	11.26	2348	2.30339	7123	0.276878	2612606	76.3169	74572	0.581714	17523	0.491223	39637	0.922202	80729	19.0566	5012	0.0510753
574	A	2	4	48	11.28	11.28	1964	1.9724	6677	0.2657	2668654	79.8038	62923	0.50249	13173	0.378041	31805	0.75754	67346	16.2747	4346	0.0453392
574	A	2	4	50	11.3	11.3	1867	2.51188	5564	0.296618	1896817	75.9901	56272	0.60202	13082	0.502955	22057	0.703812	59702	19.3281	4615	0.0644995
574	A	2	4	52	11.32	11.32	1773	2.33966	5994	0.313412	1871392	73.5335	61666	0.647073	14673	0.553302	30558	0.956365	67989	21.5888	4956	0.0679367
574	A	2	4	54	11.34	11.34	2449	2.68635	9986	0.434031	2219744	72.5026	80507	0.702217	17613	0.552087	47080	1.2248	82679	21.8231	6569	0.0748519
574	A	2	4	60	11.4	11.4	2409	2.54495	9135	0.382389	2329736	73.2867	80813	0.678871	18529	0.559364	29773	0.745968	85489	21.7319	6358	0.0697738
574	A	2	4	62	11.42	11.42	2310	2.55832	9361	0.41079	2265700	74.7174	77390	0.68154	16621	0.526017	31613	0.830355	75823	20.2064	6011	0.0691542
574	A	2	4	64	11.44	11.44	2614	2.69714	7894	0.322738	2413083	74.139	75983	0.623416	17812	0.525183	29666	0.725959	84204	20.9063	5626	0.0603013
574	A	2	4	68	11.48	11.48	2077	2.38529	8045	0.366089	2177320	74.4568	73298	0.669363	15997	0.524982	28858	0.786008	75048	20.7392	6060	0.0722949
574	A	2	4	70	11.5	11.5	2301	2.62128	6232	0.281306	2123705	72.039	71710	0.649592	17760	0.578149	20708	0.559488	84629	23.1986	6128	0.0725179
574	A	2	4	74	11.54	11.54	1757	2.33696	6517	0.343466	1904119	75.4138	60421	0.639046	13610	0.517295	18718	0.590466	62803	20.1005	4227	0.0584039
574	A	2	4	76	11.56	11.56	1763	2.28006	4774	0.244643	2024142	77.9493	54546	0.560946	11656	0.430769	21894	0.671545	57200	17.8007	4620	0.0620677
574	A	2	4	78	11.58	11.58	1737	2.33047	4482	0.23827	1912561	76.4073	58906	0.628444	12529	0.480352	19556	0.62227	59586	19.2368	4019	0.0560132
574	A	2	4	82	11.62	11.62	2126	2.46129	4184	0.191932	2216371	76.4046	56455	0.519717	14123	0.467227	18460	0.50686	69605	19.3904	4816	0.0579184
574	A	2	4	84	11.64	11.64	2539	2.99586	5000	0.233768	2042335	71.7568	67783	0.635981	16428	0.553917	28923	0.809391	80819	22.9467	5516	0.0676104
574	A	2	4	86	11.66	11.66	3011	3.57356	6271	0.294905	1886082	66.6542	79408	0.749408	19969	0.677246	27693	0.779499	95221	27.1938	6282	0.0774493
574	A	2	4	88	11.68	11.68	3129	3.84238	6520	0.317247	1762939	64.4628	82706	0.8076	20480	0.718663	25816	0.751865	98186	29.0129	6781	0.0865005
574	A	2	4	92	11.72	11.72	3088	3.71258	7623	0.363145	1767160	63.2633	88954	0.85041	21967	0.754692	37832	1.07873	103295	29.883	7538	0.0941423
574	A	2	4	94	11.74	11.74	3499	3.80207	9075	0.390731	1994379	64.5299	99652	0.861046	22881	0.71048	34650	0.892966	109860	28.7252	7768	0.087683
574	A	2	4	96	11.76	11.76	3336	3.76219	8525	0.380947	1888579	63.42	99336	0.89081	22698	0.73148	32459	0.868171	109984	29.8463	8541	0.100058
574	A	2	4	98	11.78	11.78	3384	3.62632	8538	0.362533	2010223	64.1442	99703	0.849588	24329	0.745008	33342	0.84739	113795	29.3431	7354	0.0818634
574	A	2	4	100	11.8	11.8	2989	3.21954	8800	0.375583	2047282	65.6633	97390	0.834154	23123	0.711725	29561	0.755166	109400	28.3551	7635	0.0854293
574	A	2	4	102	11.82	11.82	3019	3.55715	8677	0.405102	1786456	62.677	96075	0.900147	21996	0.740599	30428	0.850292	108576	30.7836	7033	0.0860814
574	A	2	4	106	11.86	11.86	2936	3.65524	7848	0.387146	1755313	65.0716	90532	0.896244	20606	0.733085	29441	0.869297	94466	28.2997	6778	0.087658
574	A	2	4	108	11.88	11.88	2832	3.71243	8180	0.424888	1648693	64.355	87369	0.910724	20027	0.750208	30944	0.96205	91285	28.7946	6614	0.0900657
574	A	2	4	110	11.9	11.9	3401	3.87363	8327	0.375799	1895742	64.2936	95311	0.863214	22528	0.733221	32045	0.865621	105485	28.9101	7171	0.084844
574	A	2	4	112	11.92	11.92	3166	3.77841	8548	0.40422	1802566	64.0569	94938	0.900953	22605	0.770909	28562	0.80843	101643	29.1892	7335	0.0909344
574	A	2	4	114	11.94	11.94	2885	3.32496	8896	0.406247	1883142	64.6249	97028	0.889203	21716	0.715188	28268	0.772664	105215	29.1786	7369	0.0882223
574	A	2	4	116	11.96	11.96	3048	3.54635	9074	0.418331	1857741	64.3618	96865	0.896184	21385	0.711011	29545	0.815279	104174	29.1657	7059	0.0853177
574	A	2	4	118	11.98	11.98	2978	3.62282	8728	0.420719	1784310	64.6353	94060	0.909895	20393	0.708931	33124	0.955698	97895	28.6569	7104	0.0897749
574	A	2	4	120	12	12	2831	3.47515	8431	0.410079	1762496	64.4226	95144	0.928707	21329	0.748177	29972	0.872579	98341	29.0479	7432	0.0947696
574	A	2	4	122	12.02	12.02	2952	3.70663	8353	0.415585	1714233	64.0928	93387	0.932423	20425	0.732866	32337	0.962981	96202	29.0665	6917	0.0902215
574	A	2	4	124	12.04	12.04	2852	3.57608	8403	0.417491	1717529	64.1266	93995	0.937187	21016	0.753022	32716	0.972911	96533	29.1259	6969	0.0907732
574	A	2	4	126	12.06	12.06	3122	3.82999	7860	0.382069	1751590	63.9843	93255	0.909704	21910	0.768081	30530	0.888273	98753	29.1515	6753	0.0860579
574	A	2	4	130	12.1	12.1	2422	3.2297	7277	0.3845	1680523	66.7283	80559	0.854214	18527	0.705983	24107	0.762408	84910	27.2454	6460	0.0894851
574	A	2	4	132	12.12	12.12	2632	3.30489	7336	0.364994	1788793	66.8817	83064	0.829368	19872	0.713038	25329	0.7543	89589	27.069	6340	0.082697
574	A	2	4	134	12.14	12.14	3102	3.95875	7122	0.360142	1676680	63.7152	81751	0.829608	20142	0.734546	24508	0.741788	96294	29.5707	6732	0.0892462
574	A	2	4	136	12.16	12.16	3014	3.80053	7167	0.358092	1695456	63.6597	89804	0.900453	21231	0.765019	26399	0.789486	97666	29.6341	7073	0.0926477
574	A	2	4	138	12.18	12.18	2811	3.46163	8863	0.43247	1756644	64.4141	95553	0.935682	22503	0.791883	28471	0.831531	98000	29.0397	7268	0.0929747
574	A	2	4	140	12.2	12.2	2959	3.45104	9155	0.423076	1880554	65.3081	97126	0.900749	21496	0.716412	48114	1.33086	98972	27.7756	7771	0.094148
574	A	2	4	142	12.22	12.22	3053	3.29111	10575	0.451701	2108953	67.6954	97987	0.839939	22022	0.678379	50579	1.29313	98971	25.6726	6939	0.0777038
574	A	2	4	144	12.24	12.24	3238	3.54728	11551	0.501411	1956604	63.8262	100809	0.878177	23747	0.743409	83203	2.16179	107166	28.2503	8041	0.0915079
574	A	2	5	6	12.36	12.36	2642	3.15748	9786	0.463413	1773904	63.127	96635	0.918346	22729	0.776227	75144	2.12989	102001	29.3332	7614	0.0945258
574	A	2	5	10	12.4	12.4	2978	3.38765	11186	0.504202	1913634	64.8201	101214	0.915543	21565	0.70101	67436	1.81937	101402	27.7567	8074	0.0954097
574	A	2	5	12	12.42	12.42	3068	3.24509	10612	0.444758	2020624	63.6405	105454	0.886948	24693	0.746355	73060	1.83276	114370	29.1092	8595	0.094438
574	A	2	5	14	12.44	12.44	3057	3.42184	9491	0.420951	1855401	61.8414	103007	0.916843	24108	0.771127	74719	1.98359	113430	30.552	7940	0.092324
574	A	2	5	16	12.46	12.46	3003	3.27713	9788	0.423241	1955900	63.5568	103021	0.89398	22928	0.714998	69744	1.8051	111312	29.2299	8727	0.0989311
574	A	2	5	18	12.48	12.48	2582	3.16952	9870	0.480075	1797017	65.6849	96664	0.943551	20261	0.710719	52625	1.53209	92688	27.3783	7906	0.100815
574	A	2	5	20	12.5	12.5	2707	3.3024	9803	0.473867	1791498	65.0781	94684	0.918507	21435	0.74725	56617	1.63811	94543	27.7535	6963	0.0882405
574	A	2	5	22	12.52	12.52	3077	3.50743	8857	0.400041	1905112	64.6635	91719	0.831353	22654	0.737917	44921	1.21441	104129	28.5615	7082	0.0838586
574	A	2	5	24	12.54	12.54	2641	3.31854	8645	0.430426	1783774	66.7414	88509	0.884361	20367	0.731317	37564	1.11945	88238	26.6797	7267	0.0948557
574	A	2	5	28	12.58	12.58	2262	3.1902	7946	0.444048	1577906	66.2649	80316	0.900724	18216	0.734141	39098	1.30778	79756	27.0667	6241	0.0914344
574	A	2	5	30	12.6	12.6	2213	3.10955	7768	0.432494	1567525	65.5854	80262	0.896788	18823	0.755797	35548	1.18464	82632	27.939	6603	0.09638
574	A	2	5	32	12.62	12.62	2491	3.34608	7702	0.409941	1652752	66.1069	80023	0.854753	18981	0.728587	30580	0.974216	85029	27.4837	6868	0.0958345
574	A	2	5	34	12.64	12.64	2360	3.65834	6879	0.422525	1405668	64.8831	72151	0.889361	17086	0.756855	41569	1.52826	74432	27.7637	6078	0.0978728
574	A	2	5	38	12.68	12.68	1571	2.80436	5536	0.39157	1236740	65.7375	63885	0.906819	14006	0.714451	48647	2.05954	63529	27.2883	5256	0.0974637
574	A	2	5	40	12.7	12.7	1916	3.39686	5711	0.40119	1245381	65.7448	65902	0.929062	14224	0.720616	31177	1.31091	64227	27.3997	5260	0.0968718
574	A	2	5	42	12.72	12.72	1468	2.7191	5284	0.387808	1238638	68.3156	62446	0.919744	14085	0.745514	19641	0.862815	58246	25.9604	4628	0.0890475
574	A	2	5	46	12.76	12.76	1320	2.54564	4941	0.377566	1221791	70.1611	56508	0.866555	11936	0.657781	19872	0.908907	52555	24.3884	4697	0.0940963
574	A	2	5	48	12.78	12.78	1360	2.52902	4995	0.368048	1234175	68.3388	59626	0.881684	13555	0.7203	26616	1.17385	57881	25.8998	4584	0.0885499
574	A	2	5	50	12.8	12.8	1334	2.57149	5069	0.387175	1190416	68.3289	59152	0.906698	12721	0.70073	28509	1.30337	55415	25.7041	4867	0.0974586
574	A	2	5	52	12.82	12.82	1767	3.1695	5222	0.371148	1255943	67.0813	62549	0.892152	14091	0.722265	31512	1.34056	61000	26.3288	5061	0.0943019
574	A	2	5	54	12.84	12.84	1699	3.10133	5459	0.394842	1245522	67.6991	62526	0.907568	13799	0.719785	30394	1.31582	58646	25.7596	5376	0.10194
574	A	2	5	56	12.86	12.86	1841	2.98483	5632	0.361813	1432327	69.1489	66132	0.852594	15307	0.709181	25260	0.971305	63763	24.8761	5656	0.0952589
574	A	2	5	58	12.88	12.88	2403	3.40797	6206	0.348746	1585531	66.9566	74472	0.839845	17756	0.719594	28009	0.942096	78228	26.6963	6029	0.0888213
574	A	2	5	62	12.92	12.92	2839	3.20297	8178	0.365587	1989793	66.8456	93234	0.836424	21025	0.677836	33373	0.892974	99792	27.0913	7447	0.0872769
574	A	2	5	64	12.94	12.94	2663	3.01767	8912	0.400158	2008761	67.7807	93282	0.840549	19888	0.64401	35778	0.961552	96310	26.2615	7971	0.0938304
574	A	2	5	66	12.96	12.96	3274	3.43871	9192	0.382544	2177686	68.1065	98475	0.822444	21896	0.657176	30635	0.763115	101874	25.747	7563	0.0825164
574	A	2	5	68	12.98	12.98	2886	3.18536	8939	0.390937	2130394	70.0164	92667	0.813302	19899	0.627617	27320	0.715153	90992	24.1664	7397	0.0848102
574	A	2	5	70	13	13	2746	3.14476	9056	0.410941	2038807	69.5249	92818	0.845247	20578	0.673428	29981	0.814309	88862	24.4878	8286	0.098574
574	A	2	5	72	13.02	13.02	3319	3.43119	8194	0.335652	2200470	67.7376	97969	0.80536	22746	0.671959	31502	0.77238	105159	26.1596	8038	0.0863207
574	A	2	5	74	13.04	13.04	3473	3.50235	9062	0.362104	2244259	67.3914	100617	0.806844	23320	0.672022	31305	0.748727	108969	26.4426	7064	0.0740005
574	A	2	5	76	13.06	13.06	3419	3.38129	9925	0.388928	2274435	66.9783	103755	0.815937	24212	0.68425	36305	0.851541	112676	26.814	8351	0.085793
574	A	2	5	78	13.08	13.08	3038	3.06828	9878	0.395305	2259829	67.9611	101823	0.817744	21457	0.619266	38715	0.927348	107482	26.121	8577	0.0899856
574	A	2	5	80	13.1	13.1	3174	3.54439	9170	0.405751	2026124	67.3717	93844	0.833307	20470	0.65321	35489	0.939905	97374	26.1652	7462	0.0865604
574	A	2	5	82	13.12	13.12	2888	3.20712	9836	0.432805	2046224	67.6625	98263	0.867705	21866	0.693885	43889	1.15592	96925	25.9	6936	0.0800123
574	A	2	5	84	13.14	13.14	2919	3.21718	9495	0.41466	1989183	65.282	99059	0.868159	22499	0.708607	52798	1.38011	105734	28.0416	7662	0.087723
574	A	2	5	86	13.16	13.16	3624	4.02671	8864	0.390254	1897125	62.7675	100424	0.887285	24212	0.768764	52533	1.38436	111036	29.6874	7601	0.0877329
574	A	2	5	88	13.18	13.18	3223	3.60371	9782	0.433384	1878464	62.5417	103012	0.915887	23909	0.763927	67953	1.802	110920	29.8433	8272	0.0960794
574	A	2	5	90	13.2	13.2	3555	3.95368	10299	0.45385	1828779	60.5619	105310	0.931312	25111	0.798042	56537	1.49125	118493	31.7103	8622	0.0996092
574	A	2	5	92	13.22	13.22	3264	3.79095	10036	0.461864	1734435	59.9837	102600	0.947566	23575	0.782438	80503	2.21751	113479	31.7147	8401	0.101358
574	A	2	5	94	13.24	13.24	2316	3.2753	8243	0.461906	1459911	61.4775	78403	0.881677	18433	0.744919	68885	2.31043	90350	30.7459	6970	0.102394
574	A	2	5	96	13.26	13.26	2944	3.52332	10306	0.48872	1702819	60.682	92880	0.883895	22076	0.75498	88755	2.5192	107799	31.0439	8365	0.103994
574	A	2	5	98	13.28	13.28	3167	3.95939	10236	0.507068	1663160	61.9144	93049	0.925031	21620	0.77239	88430	2.62202	97032	29.1905	8406	0.109169
574	A	2	5	100	13.3	13.3	2613	3.58746	9603	0.522408	1512383	61.8282	91838	1.00262	20942	0.821611	79584	2.59137	89406	29.5366	7692	0.109703
574	A	2	5	102	13.32	13.32	2908	3.80001	9259	0.479413	1581694	61.5446	92168	0.957711	21350	0.797239	59191	1.83443	96921	30.4758	8167	0.110862
574	A	2	5	104	13.34	13.34	2951	3.78061	10828	0.549663	1612985	61.5318	99762	1.0163	23262	0.851608	72750	2.21045	97149	29.9487	8333	0.110898
574	A	2	5	106	13.36	13.36	3168	3.90887	9451	0.462061	1641355	60.3039	99232	0.973603	24432	0.861441	63752	1.86559	106156	31.5179	8321	0.106653
574	A	2	5	108	13.38	13.38	2749	3.47385	9291	0.465216	1646415	61.9516	104207	1.04712	23042	0.832065	83623	2.50621	97403	29.618	8067	0.105896
574	A	2	5	110	13.4	13.4	2672	3.15336	9818	0.459109	1839984	64.6589	103025	0.966817	22797	0.768804	56336	1.57681	99753	28.3276	7221	0.0885248
574	A	2	5	112	13.42	13.42	3381	3.83088	10816	0.485596	1839011	62.046	114413	1.03084	26241	0.849637	82096	2.20613	108007	29.4477	8766	0.103177
574	A	2	5	114	13.44	13.44	2912	3.53043	10468	0.502869	1805328	65.1732	106247	1.02428	23363	0.809404	75223	2.16293	91491	26.6908	8426	0.106118
574	A	2	5	116	13.46	13.46	3400	3.91891	8918	0.407295	1764368	60.5554	113762	1.04267	25979	0.855676	80787	2.20843	111453	30.9119	8333	0.0997741
574	A	2	5	118	13.48	13.48	3255	3.65329	8265	0.367563	1885637	63.0186	109712	0.979155	24921	0.799281	71306	1.89808	108073	29.1875	8280	0.096537
574	A	2	5	122	13.52	13.52	3105	3.70582	8613	0.407317	1848124	65.6795	109926	1.04325	23246	0.792813	52413	1.4836	93304	26.7959	7398	0.0917205
574	A	2	5	124	13.54	13.54	3441	3.96333	7774	0.354794	1868921	64.0979	108909	0.997479	25794	0.848975	60592	1.65519	100987	27.989	7797	0.0932896
574	A	2	5	126	13.56	13.56	3683	4.05258	8236	0.359089	1954673	64.0444	106417	0.931119	25896	0.81426	54840	1.43114	106793	28.2761	7990	0.0913286
574	A	2	5	128	13.58	13.58	2828	3.26779	7545	0.345453	2020103	69.5064	90025	0.827183	21195	0.699855	44578	1.22166	86471	24.0432	7373	0.088501
574	A	2	5	130	13.6	13.6	2654	3.301	7079	0.348877	1797446	66.5699	99166	0.98078	22268	0.791456	36114	1.06531	89719	26.852	7024	0.0907526
574	A	2	5	132	13.62	13.62	2734	3.46133	7159	0.359131	1840478	69.3829	83376	0.839363	18939	0.685176	27779	0.834098	79948	24.3556	6265	0.082394
574	A	2	5	134	13.64	13.64	3512	4.77794	8379	0.451683	1444841	58.5306	115369	1.24807	25647	0.997063	43925	1.41727	99132	32.4524	8848	0.125043
574	A	2	5	136	13.66	13.66	3157	4.42943	7020	0.390271	1434143	59.916	103131	1.15061	23555	0.944402	49296	1.64037	93041	31.4119	8030	0.117036
574	A	2	5	138	13.68	13.68	3266	4.17738	9398	0.476298	1576591	60.0459	123056	1.25157	26817	0.980163	49738	1.5088	102174	31.4467	8522	0.113229
574	A	2	6	4	13.84	13.84	2460	2.67199	5806	0.24988	2230088	72.1271	82163	0.709643	19387	0.601742	31744	0.817743	87075	22.7583	5638	0.0636142
574	A	2	6	6	13.86	13.86	2034	2.58458	7241	0.364581	1883375	71.2612	76643	0.774419	17294	0.627965	30041	0.905336	76529	23.3998	6219	0.0820899
574	A	2	6	10	13.9	13.9	2533	2.69213	8563	0.360614	2246922	71.1092	92981	0.785813	19618	0.595821	37440	0.94374	91554	23.4145	8895	0.0982057
574	A	2	6	12	13.92	13.92	2302	2.84955	4663	0.228713	1918761	70.7242	81694	0.804127	17055	0.603285	25608	0.751799	80441	23.9604	6058	0.0778986
574	A	2	6	14	13.94	13.94	2546	3.11373	4739	0.229649	1881888	68.532	93083	0.905226	18820	0.657723	22009	0.638379	87836	25.8489	5856	0.0743967
574	A	2	6	16	13.96	13.96	3394	4.44095	9607	0.498089	1510565	58.8546	119734	1.24579	25127	0.939518	37037	1.14936	104030	32.7544	8633	0.117343
574	A	2	6	18	13.98	13.98	3558	4.52447	9547	0.481043	1632384	61.8103	113564	1.14833	23149	0.841191	47041	1.41871	96930	29.6597	8800	0.116245
574	A	2	6	20	14	14	3756	4.67735	8807	0.434568	1567724	58.1327	127226	1.25984	26780	0.952982	32804	0.96885	111660	33.4594	8838	0.114329
574	A	2	6	22	14.02	14.02	3264	3.9543	8539	0.409904	1741140	62.8103	112180	1.08069	24331	0.842326	41934	1.20487	101448	29.574	9825	0.123647
574	A	2	6	26	14.06	14.06	3896	4.81453	10363	0.507429	1563896	57.5466	145536	1.43011	30466	1.07585	53926	1.58048	110581	32.8823	12680	0.162773
574	A	2	6	28	14.08	14.08	4048	5.45791	8746	0.467251	1403856	56.3618	139387	1.49442	28011	1.07923	44299	1.41656	103463	33.5674	11096	0.155411
574	A	2	6	30	14.1	14.1	3466	4.08772	9442	0.441237	1813179	63.6752	123245	1.15581	26394	0.889526	35686	0.998174	100824	28.613	11371	0.13931
574	A	2	6	32	14.12	14.12	2829	3.66658	8651	0.444273	1686181	65.0742	112131	1.15563	22947	0.849874	23230	0.714057	89662	27.963	9834	0.1324
574	A	2	6	34	14.14	14.14	4214	4.74224	7951	0.35454	1817804	60.9134	128174	1.14697	27790	0.893671	35783	0.955039	114043	30.8819	9606	0.112295
574	A	2	6	36	14.16	14.16	2783	3.47226	8099	0.400392	1708255	63.4642	119772	1.18828	25893	0.92317	35353	1.04612	97859	29.3796	9720	0.125978
574	A	2	6	38	14.18	14.18	2831	3.69729	8807	0.455751	1641005	63.8162	111725	1.16027	23234	0.867099	39129	1.21199	91153	28.6458	10730	0.145571
574	A	2	6	40	14.2	14.2	3434	4.34393	9265	0.464391	1599740	60.2572	134527	1.35318	26647	0.963233	51982	1.55952	101510	30.8985	12177	0.160012
574	A	2	6	42	14.22	14.22	4342	4.9474	9791	0.442048	1677122	56.9021	139189	1.26112	30053	0.978532	70811	1.91357	121883	33.4177	11617	0.137503
574	A	2	6	44	14.24	14.24	4161	4.97681	10855	0.514445	1539723	54.8369	145634	1.3851	31165	1.06518	78718	2.23297	121058	34.8412	11859	0.147344
574	A	2	6	46	14.26	14.26	4028	5.07029	10041	0.500813	1471362	55.1493	139896	1.40027	28649	1.03051	54521	1.62766	115723	35.0518	12953	0.169373
574	A	2	6	48	14.28	14.28	3711	4.65353	10871	0.540152	1503889	56.1544	141197	1.40793	30584	1.09594	67643	2.01173	112685	34.002	10314	0.134353
574	A	2	6	50	14.3	14.3	4041	4.94306	9559	0.463314	1584717	57.7213	139304	1.35499	29657	1.03666	58063	1.68447	110943	32.6553	11088	0.140893
574	A	2	6	52	14.32	14.32	4053	5.10321	11967	0.597046	1473878	55.2593	153256	1.53444	31954	1.14972	56172	1.67742	113936	34.5203	12119	0.158513
574	A	2	6	54	14.34	14.34	3455	4.7851	9813	0.538517	1298433	53.5475	147779	1.62749	29234	1.15699	51518	1.69222	109537	36.5048	10245	0.147396
574	A	2	6	56	14.36	14.36	4067	5.55868	11614	0.628977	1323554	53.8661	147558	1.6037	29998	1.17163	55175	1.78853	107092	35.2209	11370	0.161431
574	A	2	6	58	14.38	14.38	3808	5.0387	11179	0.586111	1396635	55.0277	149315	1.57105	30823	1.16546	54925	1.72364	109096	34.7358	11029	0.151596
574	A	2	6	60	14.4	14.4	3124	4.82785	9792	0.59961	1203584	55.3854	131397	1.6147	25579	1.1296	39792	1.45846	93660	34.8292	9666	0.155174
574	A	2	6	62	14.42	14.42	4931	5.87242	11914	0.562206	1437162	50.9642	154947	1.46734	34356	1.16919	79365	2.24165	131108	37.5715	12252	0.151572
574	A	2	6	64	14.44	14.44	4188	5.08713	11715	0.563851	1533239	55.4566	138379	1.3366	30518	1.05931	53284	1.53504	119175	34.8336	10138	0.127923
574	A	2	6	66	14.46	14.46	4045	4.87766	9148	0.437094	1608608	57.7591	118425	1.13554	27872	0.960421	18536	0.530109	117843	34.1935	8510	0.106599
574	A	2	6	68	14.48	14.48	3976	5.28958	8476	0.446808	1443651	57.1892	107026	1.13221	25235	0.959353	8422	0.265733	108133	34.6162	7302	0.100913
574	A	2	6	70	14.5	14.5	3183	4.75767	7380	0.437089	1310618	58.3325	111828	1.32914	22525	0.962106	13923	0.493567	93342	33.5723	7443	0.115567
574	A	2	6	72	14.52	14.52	3454	4.80662	8246	0.454691	1386252	57.4429	123888	1.37092	27576	1.0966	22446	0.740819	101402	33.9555	9124	0.131896
574	A	2	6	74	14.54	14.54	4043	5.50763	12032	0.649463	1233419	50.0321	157127	1.70206	34014	1.32409	44157	1.42665	119553	39.1894	11919	0.168667
574	A	2	6	76	14.56	14.56	3625	4.99079	10740	0.585897	1271671	52.133	148584	1.62666	31243	1.22918	55290	1.80536	113113	37.4732	10903	0.155933
574	A	2	6	78	14.58	14.58	3868	5.36996	10584	0.582224	1243367	51.3997	149491	1.6503	31975	1.26851	66999	2.20602	111853	37.3662	10890	0.157052
574	A	2	6	80	14.6	14.6	3305	4.82522	11998	0.694081	1278459	55.5789	130993	1.52075	27351	1.14109	55642	1.92666	97230	34.158	10239	0.155286
574	A	2	6	82	14.62	14.62	3624	5.16725	10709	0.605028	1271113	53.9675	127350	1.44389	27480	1.11967	40586	1.37247	105418	36.1687	10503	0.155566
574	A	2	6	84	14.64	14.64	3847	5.80332	10513	0.628401	1094018	49.1424	147899	1.77412	30722	1.32436	62028	2.21921	107273	38.9396	10760	0.168615
574	A	2	6	86	14.66	14.66	3609	5.19501	11469	0.654154	1247654	53.4774	130271	1.49111	27410	1.12748	72687	2.48149	102280	35.4272	9774	0.146151
574	A	2	6	88	14.68	14.68	3903	5.00501	11249	0.571578	1408935	53.799	132959	1.35578	29562	1.08328	67267	2.04581	116669	36.0005	10436	0.139018
574	A	2	6	90	14.7	14.7	3141	4.35322	11443	0.628402	1382821	57.067	127803	1.40847	26547	1.05138	59928	1.96983	100079	33.3758	10129	0.145827
574	A	2	6	92	14.72	14.72	3562	4.70345	10704	0.560047	1407299	55.3333	127597	1.33976	27483	1.03702	53463	1.67429	110831	35.2153	9982	0.136921
574	A	2	6	94	14.74	14.74	3681	5.02516	12015	0.649925	1295527	52.6632	134337	1.45829	28904	1.12757	53755	1.74044	113219	37.1921	10106	0.143316
574	A	2	6	96	14.76	14.76	3518	4.69657	12163	0.6434	1393879	55.4099	124200	1.31847	26105	0.995885	51553	1.63228	109458	35.1625	10172	0.141066
574	A	2	6	98	14.78	14.78	4069	5.41784	12895	0.680324	1268772	50.3036	141522	1.4984	29983	1.14081	64382	2.0331	121012	38.7716	11154	0.154276
574	A	2	6	100	14.8	14.8	3834	5.5565	10566	0.606757	1147707	49.5287	145697	1.67905	30528	1.26429	45871	1.57668	113660	39.6372	10017	0.150805
574	A	2	6	104	14.84	14.84	3943	5.14204	14688	0.758974	1303376	50.6122	150559	1.56128	30349	1.13098	90213	2.79019	120596	37.8433	11888	0.161045
574	A	2	6	106	14.86	14.86	4473	5.97789	13052	0.691165	1156282	46.014	158038	1.67948	32397	1.23724	61719	1.95625	131497	42.2875	11277	0.156557
574	A	2	6	108	14.88	14.88	3604	4.93734	11219	0.609001	1272098	51.8927	141165	1.5378	28202	1.10405	83002	2.69682	112498	37.0851	9639	0.137174
574	A	2	6	110	14.9	14.9	4319	6.65781	16003	0.977473	818109	37.5523	180969	2.21828	33480	1.4748	112294	4.10545	126184	46.8057	13002	0.208203
574	A	2	6	112	14.92	14.92	4322	6.16317	14833	0.838115	1004124	42.6367	163904	1.85854	32663	1.33099	118494	4.00748	125246	42.9764	12734	0.188631
574	A	2	6	116	14.96	14.96	4484	6.60976	14804	0.864678	901662	39.5768	183787	2.15426	35746	1.50573	63339	2.21435	132109	46.8597	14024	0.214744
574	A	2	6	118	14.98	14.98	5590	7.80429	17863	0.98817	799166	33.2227	209729	2.32833	41497	1.65554	57493	1.90367	154315	51.8414	17644	0.255887
574	A	2	6	120	15	15	5738	7.64358	14102	0.744341	882849	35.0186	205241	2.17402	40262	1.53261	18317	0.57869	162493	52.0856	16084	0.222567
574	A	2	6	122	15.02	15.02	4488	6.68595	16742	0.988264	896425	39.765	197164	2.33562	35658	1.51799	27504	0.971766	132534	47.5099	14570	0.225476
574	A	2	6	124	15.04	15.04	6114	8.364	17050	0.924205	788597	32.1233	216045	2.35016	42816	1.67377	39578	1.2841	161084	53.0258	17916	0.254601
574	A	2	6	126	15.06	15.06	6148	8.87185	18726	1.07073	605910	26.0355	244134	2.80138	46959	1.93642	34140	1.16842	166504	57.8165	19963	0.299251
574	A	2	6	128	15.08	15.08	5302	7.72084	14379	0.829677	806350	34.9644	223999	2.59379	41081	1.70949	15169	0.523887	146716	51.4102	16379	0.247766
574	A	2	6	130	15.1	15.1	5497	7.80286	11750	0.660878	839395	35.479	212271	2.39598	39069	1.58475	9137	0.307601	150892	51.5396	15557	0.229395
574	A	2	6	132	15.12	15.12	5883	8.99667	16637	1.00812	632897	28.8199	233841	2.84359	44473	1.94348	18274	0.662784	150640	55.4332	18395	0.292222
574	A	2	6	134	15.14	15.14	5528	8.00366	14830	0.85078	739909	31.8989	212212	2.44317	42116	1.74248	13253	0.455083	156062	54.3706	15645	0.235302
574	A	2	6	136	15.16	15.16	5775	8.4113	13529	0.780786	750426	32.5459	227493	2.63477	41600	1.73143	11067	0.382293	151960	53.2583	16872	0.255275
574	A	2	6	138	15.18	15.18	6118	7.94719	14584	0.750647	932680	36.0756	213099	2.20115	42122	1.56356	10414	0.320832	162924	50.9255	15971	0.215509
574	A	2	6	140	15.2	15.2	5303	8.34627	13176	0.821693	701960	32.8973	201119	2.51703	38836	1.74665	9940	0.371033	140140	53.0737	13846	0.226373
574	A	2	6	142	15.22	15.22	4162	7.6844	11097	0.811837	662957	36.4477	164041	2.40838	30815	1.62581	16638	0.728559	112675	50.059	12215	0.234278
574	A	2	6	144	15.24	15.24	4548	8.6576	9035	0.681492	572129	32.4301	143816	2.17695	29025	1.57888	16503	0.745068	116803	53.503	11478	0.226972
574	A	2	7	2	15.32	15.32	4185	5.96168	14470	0.816765	1038464	44.0496	146815	1.66306	34468	1.4031	44427	1.50098	129642	44.4391	11199	0.165723
574	A	2	7	4	15.34	15.34	5142	6.5869	17748	0.900853	1054358	40.2174	171291	1.74481	40857	1.4956	93459	2.83939	149361	46.0397	13175	0.175319
574	A	2	7	6	15.36	15.36	4852	5.57799	15079	0.686886	1338093	45.8057	158441	1.4484	37498	1.23187	70581	1.92442	156061	43.1716	12822	0.153124
574	A	2	7	10	15.4	15.4	6982	7.30577	20077	0.832416	1111842	34.6423	227832	1.89568	51487	1.53952	128755	3.19526	200171	50.4004	17357	0.188665
574	A	2	7	12	15.42	15.42	155	2.38061	1431	0.870866	77380	35.3885	22696	2.77185	2285	1.00287	17438	6.35197	13775	50.909	2033	0.324357
574	A	3	1	20	15.7	16.444	4011	6.5037	11612	0.746054	786233	37.9609	181651	2.34212	33854	1.56862	32950	1.26712	126595	49.3936	12936	0.21789
574	A	3	1	22	15.72	16.464	3862	6.3013	11599	0.749884	787344	38.2525	183354	2.37888	33480	1.561	31523	1.21984	125627	49.3228	12616	0.21383
574	A	3	1	24	15.74	16.484	3634	5.7942	11559	0.730271	848872	40.3021	178095	2.258	33113	1.50872	32747	1.23833	125037	47.9726	11821	0.195791
574	A	3	1	26	15.76	16.504	4273	6.36712	12074	0.71288	865610	38.4069	185872	2.20236	34552	1.47124	35662	1.26029	137686	49.3681	13638	0.211101
574	A	3	1	28	15.78	16.524	4316	6.83379	13180	0.826897	674500	31.8009	206926	2.60531	37514	1.69736	51755	1.94352	141844	54.0428	15163	0.249399
574	A	3	1	30	15.8	16.544	4326	6.47466	12976	0.769532	793649	35.3701	190997	2.27311	36148	1.54602	40267	1.42934	144180	51.9257	13612	0.211632
574	A	3	1	32	15.82	16.564	4173	6.23945	12004	0.71118	867417	38.6192	189106	2.24837	34102	1.45706	27634	0.979936	137705	49.5444	12905	0.200441
574	A	3	1	34	15.84	16.584	4818	7.68851	14382	0.90939	592793	28.168	223990	2.84229	40245	1.83522	28954	1.09582	148944	57.1933	16136	0.267486
574	A	3	1	36	15.86	16.604	4955	8.34176	14877	0.992395	465588	23.3396	247234	3.30968	42508	2.04496	21207	0.846737	150136	60.8198	17445	0.305081
574	A	3	1	38	15.88	16.624	4930	7.33559	12305	0.725479	635037	28.1361	220293	2.60647	38390	1.63232	11974	0.422555	164559	58.9191	14386	0.222361
574	A	3	1	40	15.9	16.644	5232	7.55939	14104	0.807452	693671	29.8435	235205	2.70228	40967	1.69143	34670	1.18803	160937	55.9528	17001	0.255166
574	A	3	1	42	15.92	16.664	5251	7.21038	13158	0.715915	887742	36.2978	208381	2.2753	38149	1.49692	27558	0.89747	154029	50.8939	14888	0.212365
574	A	3	1	44	15.94	16.684	4460	6.70607	14047	0.836898	722941	32.3678	214529	2.56498	37707	1.62015	39018	1.39141	150019	54.2783	15008	0.234415
574	A	3	1	46	15.96	16.704	5653	8.21667	13085	0.753609	584873	25.3137	252091	2.91366	43597	1.81081	23880	0.823203	171290	59.9095	17145	0.258871
574	A	3	1	48	15.98	16.724	4267	6.08671	14661	0.828665	926359	39.3474	208726	2.36756	36938	1.50568	39944	1.35135	140702	48.2955	14651	0.217099
574	A	3	1	50	16	16.744	4694	6.69186	14141	0.798802	886770	37.6436	205477	2.32933	37146	1.51327	57684	1.95036	142395	48.8478	15191	0.224967
574	A	3	1	52	16.02	16.764	4262	6.18177	13368	0.768283	936308	40.4385	196023	2.26084	34053	1.41142	43304	1.48965	135363	47.2439	13644	0.205575
574	A	3	1	54	16.04	16.784	4432	6.33778	13397	0.759102	872895	37.1686	205243	2.33383	36814	1.50436	42442	1.43942	145965	50.2265	15512	0.230428
574	A	3	1	56	16.06	16.804	4827	6.61941	13388	0.727466	897316	36.6407	208758	2.2764	38034	1.49044	32693	1.06329	154418	50.9549	15958	0.227326
574	A	3	1	58	16.08	16.824	4876	6.52448	14103	0.747737	881421	35.119	215876	2.29694	39664	1.51663	49280	1.5639	161512	52.0036	16378	0.227653
574	A	3	1	60	16.1	16.844	4616	6.46347	14659	0.813316	822010	34.2731	213048	2.37214	37595	1.50429	51579	1.71289	156150	52.6124	17075	0.248365
574	A	3	1	62	16.12	16.864	4477	6.70522	14511	0.861149	689090	30.7311	214987	2.56037	37611	1.60969	61000	2.16676	152883	55.0975	17241	0.268237
574	A	3	1	64	16.14	16.884	4519	6.66904	14914	0.872108	738957	32.4726	211872	2.48633	37500	1.58144	72418	2.53468	149639	53.1389	15977	0.244932
574	A	3	1	66	16.16	16.904	4880	7.57567	15750	0.968807	578736	26.7521	227942	2.81378	39727	1.76233	92156	3.39297	151141	56.4586	17096	0.275693
574	A	3	1	68	16.18	16.924	4176	6.83822	14498	0.940689	564791	27.5389	227313	2.95986	38414	1.79752	58423	2.26894	145600	57.3708	16759	0.285076
574	A	3	1	70	16.2	16.944	5292	7.71958	14959	0.864633	615248	26.724	234501	2.72008	42917	1.78897	88669	3.06762	161933	56.8402	18146	0.274969
574	A	3	1	72	16.22	16.964	4340	7.03791	14633	0.940248	625185	30.1883	219326	2.82819	37715	1.74771	51440	1.97838	140926	54.991	17111	0.288243
574	A	3	1	74	16.24	16.984	5112	7.65139	13993	0.829881	616873	27.493	237477	2.82641	42787	1.83005	55940	1.98576	158570	57.1107	17546	0.272808
574	A	3	1	76	16.26	17.004	4871	7.07739	14497	0.83462	764208	33.0631	222822	2.57441	38850	1.61305	55356	1.90755	150607	52.6559	18153	0.273989
574	A	3	1	78	16.28	17.024	4098	6.73405	13395	0.872173	683478	33.443	205338	2.68311	34757	1.6321	52035	2.02794	132391	52.3491	15141	0.258457
574	A	3	1	80	16.3	17.044	4433	6.70415	13162	0.788721	767010	34.5401	204083	2.45424	36832	1.59174	38772	1.39066	143684	52.2879	15434	0.242468
574	A	3	1	82	16.32	17.064	4648	7.09637	14643	0.885841	667412	30.3418	217662	2.64251	38943	1.69903	59931	2.17009	149472	54.9132	15835	0.251141
574	A	3	1	84	16.34	17.084	4144	6.70309	14276	0.914992	675660	32.5432	201651	2.5937	34649	1.60157	33618	1.28968	138995	54.1005	15074	0.253287
574	A	3	1	86	16.36	17.104	4612	7.01314	14083	0.848543	658608	29.8214	214850	2.5979	39460	1.71467	50066	1.8056	152935	55.9599	15123	0.238886
574	A	3	1	88	16.38	17.124	4426	6.9051	13112	0.810556	703484	32.6806	203765	2.52786	35868	1.59907	49175	1.81953	142284	53.4148	14964	0.242514
574	A	3	1	90	16.4	17.144	3541	5.32061	15125	0.900506	863383	38.6292	172432	2.06024	30972	1.32986	96114	3.42514	133106	48.126	13350	0.208376
574	A	3	1	92	16.42	17.164	3921	5.60143	15264	0.864024	845233	35.9547	171622	1.94957	32471	1.32556	70147	2.37666	150460	51.7213	13934	0.20678
574	A	3	1	94	16.44	17.184	4056	5.73289	13529	0.757699	915833	38.545	180240	2.02577	32629	1.31789	41893	1.40434	147025	50.005	14398	0.211401
574	A	3	1	96	16.46	17.204	3773	5.45991	14685	0.84203	877868	37.8272	175545	2.02	32278	1.33477	44976	1.5436	145768	50.7583	14247	0.214166
574	A	3	1	98	16.48	17.224	3673	5.34508	13769	0.793947	861436	37.3279	168027	1.94436	29601	1.23095	43659	1.50683	147512	51.6544	12999	0.196505
574	A	3	1	100	16.5	17.244	3801	5.76092	13437	0.80696	769170	34.7131	168286	2.02818	29357	1.27147	39227	1.41005	147542	53.8092	12711	0.200126
574	A	3	1	102	16.52	17.264	3528	4.73825	12655	0.673452	1082987	43.3101	166417	1.77726	28391	1.08961	32923	1.04868	146010	47.1866	12619	0.176053
574	A	3	1	104	16.54	17.284	3255	4.32922	13341	0.703076	1171039	46.3774	146266	1.54691	27164	1.03241	56966	1.79692	137674	44.0613	11057	0.152766
574	A	3	1	106	16.56	17.304	3260	4.32369	12337	0.648339	1176111	46.4475	149944	1.58136	27662	1.04839	42679	1.34248	139250	44.4405	12174	0.167726
574	A	3	1	108	16.58	17.324	2860	3.93766	13494	0.736153	1121371	45.9725	140839	1.54191	24647	0.969697	80318	2.62265	132967	44.0517	11732	0.167793
574	A	3	1	110	16.6	17.344	2877	4.06287	13132	0.734818	963636	40.5213	153425	1.72287	26753	1.07961	56279	1.88493	146576	49.8084	12623	0.185176
574	A	3	1	112	16.62	17.364	3284	4.69844	14569	0.825915	895045	38.1305	159614	1.81587	26457	1.08166	70810	2.4027	147703	50.8494	13156	0.195526
574	A	3	1	114	16.64	17.384	3507	4.30695	12351	0.601023	1319497	48.2524	141513	1.38196	26152	0.917781	55623	1.62011	144709	42.7638	12231	0.156036
574	A	3	1	116	16.66	17.404	3488	5.14732	13641	0.797639	853029	37.484	158062	1.8548	27976	1.17975	34912	1.2219	146762	52.1153	13006	0.199378
574	A	3	1	118	16.68	17.424	3772	5.42178	16773	0.955293	699486	29.9382	186183	2.12801	31654	1.30017	66622	2.27114	166919	57.7328	16916	0.252579
574	A	3	1	120	16.7	17.444	3761	5.68457	15792	0.945772	545344	24.5438	186417	2.24049	29728	1.28399	88494	3.17222	170175	61.8923	15088	0.236895
574	A	3	1	122	16.72	17.464	3744	5.75694	14761	0.899347	566612	25.9429	189325	2.31488	31165	1.36938	59064	2.15394	165766	61.3336	14339	0.229037
574	A	3	1	124	16.74	17.484	4096	6.6978	15962	1.03423	375782	18.2972	216705	2.81777	34058	1.59145	45289	1.75639	171590	67.5167	16982	0.288464
574	A	3	1	126	16.76	17.504	4259	6.7538	16974	1.06655	233206	11.0118	205050	2.58562	32738	1.48352	178089	6.69782	183689	70.0923	18736	0.308636
574	A	3	1	128	16.78	17.524	3290	6.42553	12636	0.977863	311446	18.1123	161106	2.50201	24418	1.36277	42608	1.9736	145515	68.386	12813	0.259952
574	A	3	1	132	16.82	17.564	4093	6.36309	12104	0.745608	367791	17.0257	198488	2.45372	31159	1.38424	8437	0.311078	191016	71.4566	16100	0.260005
574	A	3	1	134	16.84	17.584	4234	7.17496	13460	0.903794	248452	12.5368	220226	2.96757	33754	1.63454	9348	0.375702	181729	74.1037	17208	0.302921
574	A	3	1	136	16.86	17.604	2781	4.3399	12995	0.803546	917150	42.6183	144200	1.7894	22914	1.02183	20422	0.755845	129122	48.487	11358	0.184124
574	A	3	1	138	16.88	17.624	3404	4.20612	14330	0.701606	1289515	47.4455	138926	1.36502	25891	0.9142	37147	1.08861	148390	44.1208	12321	0.158149
574	A	3	1	140	16.9	17.644	4940	8.19569	15089	0.991915	207544	10.2529	230437	3.04001	37159	1.76166	25899	1.01905	186404	74.415	18791	0.323846
574	A	3	1	142	16.92	17.664	4206	7.32828	12781	0.882375	264533	13.7243	200879	2.78312	32994	1.64274	22162	0.915793	172831	72.4605	14527	0.262929
574	A	3	2	2	17.02	17.764	2204	6.33648	6914	0.787629	218824	18.7331	123158	2.81555	18617	1.52949	21507	1.46647	98427	68.0922	8005	0.239072
574	A	3	2	4	17.04	17.784	3428	6.87623	8813	0.700469	277672	16.5851	170328	2.71681	27541	1.57866	9186	0.43701	146824	70.8685	11384	0.237211
574	A	3	2	6	17.06	17.804	3256	6.18785	9665	0.727801	518622	29.3483	146816	2.21867	25262	1.3719	11386	0.513195	129960	59.4308	10203	0.201425
574	A	3	2	8	17.08	17.824	2491	5.22555	10100	0.839528	521782	32.593	132554	2.21113	21520	1.29003	19308	0.960619	112262	56.668	9737	0.212184
574	A	3	2	10	17.1	17.844	2479	5.10872	10381	0.847676	584064	35.8404	125601	2.05822	21303	1.25452	15030	0.734598	108796	53.9504	9597	0.205447
574	A	3	2	12	17.12	17.864	2966	5.90387	8655	0.682634	459474	27.2335	145803	2.30779	24634	1.4012	9048	0.427143	129090	61.8308	10306	0.213101
574	A	3	2	14	17.14	17.884	3056	5.4913	11104	0.7906	610291	32.6539	136600	1.95181	23995	1.23209	37844	1.61278	129705	56.0822	9926	0.185279
574	A	3	2	16	17.16	17.904	3207	5.79363	12320	0.881897	441297	23.7388	164928	2.36925	27597	1.42467	40312	1.7272	146857	63.84	11962	0.224484
574	A	3	2	18	17.18	17.924	3407	5.83407	12054	0.817874	527947	26.9195	162514	2.21286	26829	1.31282	43081	1.74961	147896	60.9401	11985	0.21319
574	A	3	2	20	17.2	17.944	3482	5.65817	11281	0.726357	610745	29.5518	156524	2.02252	27694	1.28598	25095	0.967141	152423	59.5997	11159	0.188366
574	A	3	2	22	17.22	17.964	3475	5.69121	11306	0.733693	581138	28.3404	161552	2.10391	27458	1.28505	24769	0.962087	153993	60.6873	11542	0.196364
574	A	3	2	24	17.24	17.984	2902	4.77622	12851	0.838067	636203	31.1788	149239	1.95314	25143	1.18251	45209	1.76468	146759	58.1216	10819	0.184971
574	A	3	2	26	17.26	18.004	3143	4.8084	12815	0.776837	754131	34.3542	141470	1.72101	24012	1.04975	39317	1.42657	151280	55.6909	10844	0.172336
574	A	3	2	28	17.28	18.024	3458	5.53679	11721	0.743623	599641	28.5891	161983	2.06237	27728	1.26868	22872	0.868545	157635	60.734	11835	0.196848
574	A	3	2	30	17.3	18.044	2830	4.80074	11473	0.771178	558747	28.2237	148546	2.00377	23708	1.14926	46741	1.88051	149368	60.9714	11315	0.199391
574	A	3	2	32	17.32	18.064	3048	4.96914	13973	0.902634	526474	25.5576	149647	1.93999	23886	1.11278	94074	3.63741	157239	61.6841	11590	0.196282
574	A	3	2	34	17.34	18.084	2940	5.42854	12417	0.908465	306891	16.8732	160007	2.3493	24489	1.29213	133545	5.84816	150943	67.0649	12267	0.23529
574	A	3	2	36	17.36	18.104	3170	5.50949	13761	0.947671	228635	11.8324	167103	2.30941	25803	1.28151	212606	8.76362	165304	69.1325	12375	0.223423
574	A	3	2	38	17.38	18.124	3282	5.66367	14072	0.962211	165444	8.50133	177553	2.43641	27392	1.35078	304095	12.4458	164733	68.4048	13110	0.235013
574	A	3	2	40	17.4	18.144	3191	5.62555	14494	1.01247	159725	8.38471	183160	2.56763	28590	1.4403	269344	11.2616	163705	69.4459	14294	0.261771
574	A	3	2	42	17.42	18.164	3194	5.95713	12640	0.934125	168755	9.37208	178796	2.6517	26471	1.41083	69348	3.06755	170112	76.3456	13471	0.260995
574	A	3	2	44	17.44	18.184	3210	5.74511	13246	0.939364	137075	7.30514	187015	2.66155	27739	1.41868	142592	6.05263	175589	75.6201	13844	0.257386
574	A	3	2	46	17.46	18.204	2832	5.25773	11896	0.875107	156140	8.63169	167739	2.4763	23055	1.22312	109027	4.80059	171271	76.513	11535	0.22246
574	A	3	2	48	17.48	18.224	2676	4.37444	10985	0.711527	596828	29.0511	135550	1.76197	18538	0.865963	53861	2.08817	155074	60.9988	8717	0.148024
574	A	3	2	50	17.5	18.244	2952	4.63997	8806	0.548445	490315	22.9483	148902	1.86107	20408	0.916642	6802	0.253566	181571	68.6739	9679	0.158037
574	A	3	2	52	17.52	18.264	3056	5.57652	8273	0.598175	244922	13.308	168784	2.44909	21945	1.14432	6613	0.286196	174089	76.4412	10363	0.196438
574	A	3	2	54	17.54	18.284	3715	6.10188	7849	0.510828	122937	6.01263	194219	2.53665	27591	1.29501	8221	0.320247	209997	82.9974	13206	0.225323
574	A	3	2	56	17.56	18.304	3510	5.49217	8028	0.497737	111842	5.21097	173923	2.164	24084	1.07688	7388	0.27417	225986	85.0874	12100	0.196676
574	A	3	2	58	17.58	18.324	3156	4.99867	6434	0.403788	155512	7.33429	134182	1.68996	19596	0.886921	4511	0.169452	221379	84.3724	8785	0.14454
574	A	3	2	60	17.6	18.344	2854	4.09854	9414	0.53568	650185	27.8029	126619	1.4459	20184	0.828292	4475	0.152414	188095	64.9979	9276	0.138378
574	A	3	2	62	17.62	18.364	3097	4.57484	10831	0.633956	680173	29.9179	142647	1.67557	22217	0.937823	4532	0.158774	174278	61.9476	10007	0.153557
574	A	3	2	64	17.64	18.384	3263	5.14865	11217	0.701307	559858	26.3045	159689	2.00362	24514	1.10533	5095	0.190667	169518	64.3633	11138	0.182563
574	A	3	2	66	17.66	18.404	3733	6.56352	12556	0.874753	193193	10.1146	222747	3.11426	32484	1.63211	7075	0.295026	182274	77.117	15814	0.288835
574	A	3	2	68	17.68	18.424	3994	6.70938	13229	0.880556	291163	14.5642	229771	3.06926	34174	1.64048	7462	0.297294	179507	72.5609	15926	0.277914
574	A	3	2	70	17.7	18.444	4472	7.21185	14172	0.90559	306142	14.7009	232098	2.97633	36515	1.68274	9504	0.363502	185224	71.8768	16848	0.282243
574	A	3	2	72	17.72	18.464	4627	7.3384	15289	0.960808	398836	18.8353	222844	2.81039	35806	1.62277	8582	0.322809	177690	67.8128	18009	0.296703
574	A	3	2	74	17.74	18.484	4741	7.48687	14124	0.883779	347735	16.3514	232820	2.92358	36839	1.66241	10610	0.397376	184222	70.0033	17756	0.291276
574	A	3	2	76	17.76	18.504	4439	6.90055	11487	0.707555	466474	21.5925	209669	2.59177	33805	1.50169	9132	0.336682	176792	66.1314	14733	0.237914
574	A	3	2	78	17.78	18.524	4192	6.6218	14252	0.892044	555244	26.1166	216640	2.72118	35182	1.58809	18064	0.676744	160852	61.1404	14821	0.243199
574	A	3	2	80	17.8	18.544	4410	6.77477	14991	0.91252	579635	26.5148	208976	2.5528	34249	1.5035	51897	1.89084	161171	59.5785	17063	0.272296
574	A	3	2	82	17.82	18.564	4328	6.40193	13622	0.798399	642323	28.2914	209832	2.46808	34866	1.47376	22010	0.772146	167353	59.5667	14814	0.227628
574	A	3	2	84	17.84	18.584	4420	6.57405	14352	0.845821	617944	27.3676	203235	2.40366	33844	1.43844	19951	0.703771	168892	60.4459	14290	0.220787
574	A	3	2	86	17.86	18.604	3765	5.83449	11793	0.724131	652209	30.0955	196352	2.41956	31724	1.40484	13888	0.510426	157679	58.7974	13273	0.213667
574	A	3	2	88	17.88	18.624	3661	6.45459	12168	0.850048	563808	29.599	192712	2.70173	29915	1.50716	18651	0.779878	136450	57.8881	11987	0.219538
574	A	3	2	90	17.9	18.644	3859	6.37815	14803	0.96945	604924	29.7713	192914	2.53541	31807	1.50225	25501	0.999616	144845	57.6064	13830	0.23745
574	A	3	2	92	17.92	18.664	3543	5.88173	12738	0.837897	611764	30.2409	185753	2.45207	30274	1.43616	18925	0.745119	145654	58.1839	12885	0.222202
574	A	3	2	94	17.94	18.684	3792	6.40852	13416	0.898396	591325	29.7572	190045	2.55393	31218	1.50763	25517	1.02276	141674	57.6137	13546	0.23781
574	A	3	2	96	17.96	18.704	3375	5.83726	15115	1.03585	585323	30.1444	189240	2.60263	30139	1.48958	38881	1.59488	137065	57.0438	14004	0.251604
574	A	3	2	98	17.98	18.724	3757	6.22427	14982	0.983496	556565	27.4562	197587	2.60297	31896	1.51002	38467	1.51144	149162	59.4637	14403	0.247874
574	A	3	2	100	18	18.744	4003	7.01807	16848	1.1704	389566	20.3372	216996	3.02516	34545	1.73068	55369	2.30226	151994	64.1218	16171	0.294509
574	A	3	2	102	18.02	18.764	4591	7.57297	17328	1.13256	394878	19.3954	223521	2.93185	36457	1.71846	39040	1.5273	164807	65.4156	17851	0.30588
574	A	3	2	104	18.04	18.784	4777	8.11247	16748	1.12698	279748	14.1463	236601	3.19506	37522	1.82089	36938	1.48774	170697	69.7542	20201	0.35637
574	A	3	2	106	18.06	18.804	4286	7.14904	15909	1.05146	473641	23.5246	213839	2.83626	33991	1.62017	37687	1.49088	154515	62.0173	17913	0.31038
574	A	3	2	108	18.08	18.824	4352	7.93524	18118	1.30899	273552	14.8521	242668	3.51842	37137	1.93499	27158	1.17442	156988	68.8786	20972	0.397229
574	A	3	2	110	18.1	18.844	4807	7.95095	16977	1.11266	324952	16.0045	234116	3.07921	37727	1.78319	44931	1.76257	170853	68.0008	17818	0.30615
574	A	3	2	112	18.12	18.864	4248	7.4377	14798	1.02663	326907	17.0434	217628	3.02993	34640	1.73314	29420	1.22167	161938	68.226	15484	0.281622
574	A	3	2	114	18.14	18.884	4631	8.2707	16489	1.16686	218440	11.6165	245860	3.49156	39275	2.0044	48255	2.04393	165359	71.0627	18506	0.343328
574	A	3	2	116	18.16	18.904	4442	7.72456	15388	1.06031	351753	18.2142	225413	3.11701	35764	1.77722	35464	1.46264	158482	66.3165	18135	0.327599
574	A	3	2	118	18.18	18.924	4548	7.86844	16305	1.11775	366754	18.8938	234377	3.22439	36995	1.82899	33025	1.35508	157045	65.3791	18500	0.332483
574	A	3	2	120	18.2	18.944	4532	8.0176	15097	1.05828	339719	17.8958	239382	3.36752	37957	1.91887	13129	0.55086	157091	66.8732	17296	0.317856
574	A	3	2	122	18.22	18.964	4060	7.09378	14835	1.02706	393464	20.4707	231996	3.22327	35627	1.77882	14856	0.615615	155780	65.4953	16277	0.295431
574	A	3	2	124	18.24	18.984	4010	6.83743	15626	1.05573	480076	24.3745	213464	2.89426	33042	1.60996	23178	0.937303	151119	62.0032	16240	0.28765
574	A	3	2	126	18.26	19.004	4829	8.10521	17143	1.14012	235520	11.771	234976	3.13613	36479	1.74965	54381	2.16476	177269	71.5956	19362	0.337588
574	A	3	2	128	18.28	19.024	4338	7.26548	14924	0.99041	357856	17.8468	218127	2.90501	34893	1.66999	28893	1.14769	168441	67.8842	16692	0.290411
574	A	3	2	130	18.3	19.044	4141	8.27767	14157	1.12132	166632	9.91832	240732	3.82649	35332	2.01823	17861	0.846768	153090	73.6371	17054	0.354127
574	A	3	2	132	18.32	19.064	4416	7.4558	16732	1.11936	278111	13.9817	227100	3.04892	35999	1.73682	63423	2.53961	171827	69.8077	17683	0.310135
574	A	3	2	134	18.34	19.084	4597	7.86818	15698	1.06463	290235	14.792	230867	3.14214	36854	1.80254	41864	1.6994	168336	69.3304	16916	0.300765
574	A	3	2	136	18.36	19.104	4280	7.60046	15052	1.05912	254028	13.4324	226579	3.19948	35951	1.82435	39745	1.67392	165918	70.8983	16910	0.311939
574	A	3	2	138	18.38	19.124	4444	8.16156	14624	1.06419	255157	13.9535	220038	3.21337	34566	1.81405	28145	1.2259	158983	70.2581	16210	0.309252
574	A	3	2	140	18.4	19.144	3908	7.44448	14357	1.08368	326956	18.5458	209157	3.16823	32522	1.77034	30296	1.36874	144682	66.3195	15121	0.29922
574	A	3	2	142	18.42	19.164	4332	7.75356	13737	0.974227	308433	16.4381	212330	3.02196	33343	1.70537	27843	1.18191	159380	68.6425	15189	0.282405
574	A	3	2	144	18.44	19.184	4382	7.51832	15935	1.08332	394407	20.1498	220028	3.00186	35929	1.76155	36335	1.47853	156696	64.6923	17636	0.314325
574	A	3	3	2	18.52	19.264	2226	6.45216	7777	0.893197	230959	19.9339	140862	3.24667	20796	1.7225	18621	1.28008	94875	66.1726	9928	0.298931
574	A	3	3	4	18.54	19.284	3635	7.30265	12310	0.979918	389002	23.2705	186227	2.97497	29650	1.70216	23695	1.12899	129030	62.3754	12719	0.265435
574	A	3	3	6	18.56	19.304	3627	6.82756	12669	0.944965	399965	22.419	194207	2.90701	30929	1.66373	12615	0.563197	142195	64.4093	13562	0.265199
574	A	3	3	8	18.58	19.324	3957	6.77533	14409	0.977583	483089	24.6302	212310	2.89067	34034	1.66524	11034	0.448077	151310	62.3417	15245	0.271158
574	A	3	3	10	18.6	19.344	4263	7.11064	14964	0.989001	512155	25.4373	213418	2.83067	34060	1.62345	12523	0.495402	152598	61.2476	15347	0.265917
574	A	3	3	12	18.62	19.364	4049	6.70046	15376	1.00822	517233	25.4871	208893	2.74881	34352	1.62446	17040	0.668778	154425	61.4923	15701	0.269907
574	A	3	3	14	18.64	19.384	4016	6.80278	14613	0.980816	555629	28.0256	207450	2.79428	33056	1.60009	16828	0.676053	144389	58.8536	15161	0.266778
574	A	3	3	16	18.66	19.404	4151	6.38408	14368	0.875582	632853	28.9818	199157	2.43559	31782	1.39678	17106	0.623949	159606	59.0665	14757	0.235762
574	A	3	3	18	18.68	19.424	3846	5.99312	14786	0.912956	558049	25.8936	197281	2.44452	31353	1.39612	41874	1.54755	164215	61.5748	14662	0.237338
574	A	3	3	20	18.7	19.444	3903	6.0617	14972	0.921364	560214	25.9076	187763	2.31884	29238	1.29761	35139	1.29432	165796	61.9608	14742	0.237839
574	A	3	3	22	18.72	19.464	3839	5.92308	14674	0.897085	548308	25.1902	193055	2.36851	29809	1.31425	31422	1.14979	169461	62.9138	15183	0.243342
574	A	3	3	24	18.74	19.484	3502	5.67333	14321	0.919286	563357	27.1758	184250	2.37352	28912	1.33844	14867	0.571216	158323	61.7181	13687	0.230335
574	A	3	3	26	18.76	19.504	3403	5.59113	11850	0.771456	572721	28.0193	177240	2.3156	27094	1.27207	13078	0.509606	155076	61.3096	12373	0.211175
574	A	3	3	28	18.78	19.524	3891	6.26337	13246	0.844864	453374	21.731	191762	2.45456	29020	1.33489	8848	0.337791	172461	66.8012	13891	0.232279
574	A	3	3	30	18.8	19.544	3408	5.71784	12658	0.841498	428739	21.4192	183435	2.44725	27543	1.32052	8489	0.337788	167653	67.6847	13270	0.231277
574	A	3	3	32	18.82	19.564	3643	5.77222	13603	0.854031	490498	23.1418	191584	2.41383	28560	1.29313	8605	0.323363	173068	65.9853	13141	0.216293
574	A	3	3	34	18.84	19.584	3747	5.77533	12356	0.754617	422899	19.4092	192515	2.35951	28642	1.26153	7469	0.27303	188604	69.9505	13514	0.216375
574	A	3	3	36	18.86	19.604	3790	6.11025	12750	0.814489	389959	18.7204	193635	2.48237	28235	1.30079	7768	0.297019	180536	70.0374	14168	0.237278
574	A	3	3	38	18.88	19.624	3538	5.96889	12841	0.8584	401808	20.1851	200878	2.69483	27630	1.33204	8102	0.324178	168483	68.3972	13658	0.23936
574	A	3	3	40	18.9	19.644	4164	6.69484	12522	0.797735	362634	17.361	214683	2.74468	31343	1.44003	8932	0.340592	181870	70.3618	15524	0.259276
574	A	3	3	42	18.92	19.664	4081	6.43959	12901	0.806622	372064	17.4818	216300	2.71401	32697	1.47435	8522	0.318925	185704	70.5114	15454	0.253316
574	A	3	3	44	18.94	19.684	3945	6.2655	10943	0.688653	470782	22.2641	184130	2.3254	28249	1.28207	7022	0.2645	174489	66.6843	13665	0.225449
574	A	3	3	46	18.96	19.704	4009	6.7538	13843	0.924054	343673	17.2399	209443	2.8057	32382	1.55889	8834	0.352959	172921	70.0981	15236	0.266632
574	A	3	3	48	18.98	19.724	3780	6.08668	12648	0.806986	406293	19.4807	200824	2.57139	29441	1.3547	8083	0.308686	178476	69.1537	14176	0.237122
574	A	3	3	50	19	19.744	4165	6.93498	13088	0.863493	343522	17.0318	218106	2.88776	31765	1.5114	7810	0.308416	175186	70.1902	15722	0.271937
574	A	3	3	52	19.02	19.764	3739	6.34218	11113	0.746913	333152	16.8268	212017	2.85968	32343	1.5677	7207	0.28993	174193	71.0985	15222	0.268216
574	A	3	3	54	19.04	19.784	3792	6.68024	11564	0.807212	332495	17.4416	198173	2.77608	28855	1.4526	6931	0.289585	165831	70.2969	13977	0.255781
574	A	3	3	56	19.06	19.804	4639	8.04393	16361	1.12411	218586	11.2861	250435	3.45305	37507	1.85848	10793	0.443856	176003	73.4363	19663	0.35418
574	A	3	3	58	19.08	19.824	4862	8.01492	17424	1.13812	236442	11.6061	255142	3.34449	40023	1.88536	15888	0.621168	184174	73.0566	19463	0.333291
574	A	3	3	60	19.1	19.844	4532	7.48534	15980	1.04581	234191	11.5178	236005	3.09961	36228	1.70988	32173	1.26029	185120	73.5735	17938	0.307769
574	A	3	3	62	19.12	19.864	4505	7.48889	14494	0.954699	214031	10.5944	230238	3.04343	35593	1.69078	38164	1.50464	186046	74.42	17557	0.303181
574	A	3	3	64	19.14	19.884	4375	7.14112	13937	0.901391	260748	12.6732	223228	2.89735	35167	1.6403	54255	2.10031	184245	72.3654	16570	0.280958
574	A	3	3	66	19.16	19.904	4647	7.60233	15682	1.01656	329654	16.0587	237995	3.09604	38080	1.78021	89792	3.48391	169284	66.6403	18950	0.322042
574	A	3	3	68	19.18	19.924	4828	7.278	17432	1.04123	389880	17.5006	234110	2.80626	38603	1.6629	92987	3.32447	182155	66.0743	19944	0.31231
574	A	3	3	70	19.2	19.944	3435	7.02013	13734	1.11217	280028	17.0411	184431	2.9972	27267	1.59241	52197	2.52999	137095	67.4197	13535	0.287347
574	A	3	3	72	19.22	19.964	4205	7.33673	13092	0.905103	330704	17.1812	217381	3.01594	33633	1.67688	29602	1.22494	162870	68.3792	15448	0.279987
574	A	3	3	74	19.24	19.984	4199	7.10721	13294	0.891589	421888	21.2631	213067	2.8677	33006	1.59642	32800	1.31669	158838	64.6926	15053	0.264671
574	A	3	3	76	19.26	20.004	4378	7.06826	15281	0.977561	412747	19.8426	226625	2.90944	36060	1.66365	58637	2.24525	167280	64.9872	18253	0.306126
574	A	3	3	78	19.28	20.024	4466	7.11333	16021	1.01111	407899	19.3457	227476	2.88107	36467	1.6598	62428	2.35825	170487	65.342	17455	0.288804
574	A	3	3	80	19.3	20.044	4532	7.06164	14639	0.903821	494326	22.9354	219597	2.72086	34590	1.54016	32979	1.21873	168971	63.3541	16392	0.265325
574	A	3	3	82	19.32	20.064	4393	7.12561	12118	0.778838	375452	18.1339	217007	2.79897	33506	1.55304	21542	0.828709	175557	68.5213	15409	0.259636
574	A	3	3	84	19.34	20.084	4328	6.91373	15020	0.950716	462068	21.979	212064	2.69374	33211	1.51603	85001	3.22036	162446	62.4426	17103	0.28381
574	A	3	3	86	19.36	20.104	4022	6.28603	14788	0.915796	411651	19.1576	209699	2.60612	33141	1.48013	145927	5.4091	169848	63.8765	16554	0.268761
574	A	3	3	88	19.38	20.124	4442	6.84562	15158	0.925617	455080	20.8833	218340	2.67566	35309	1.55496	97781	3.57391	170556	63.2481	18293	0.292852
574	A	3	3	90	19.4	20.144	4535	6.99005	11926	0.728372	508719	23.3484	205952	2.52425	32438	1.42875	24566	0.898035	172050	63.8123	16850	0.269794
574	A	3	3	92	19.42	20.164	4637	6.56717	13019	0.730591	511016	21.5503	208638	2.34963	32308	1.30753	15587	0.523552	195760	66.7132	17537	0.258004
574	A	3	3	94	19.44	20.184	4492	6.84185	14701	0.88723	538390	24.4179	226471	2.7429	36961	1.60871	50714	1.83197	167468	61.3779	18427	0.291553
574	A	3	3	96	19.46	20.204	4717	6.9909	14029	0.823852	606810	26.7792	216318	2.54932	37419	1.58475	62037	2.18059	164985	58.838	16459	0.253396
574	A	3	3	98	19.48	20.224	4280	6.7461	13842	0.864496	557549	26.1679	216757	2.71673	36279	1.63405	51348	1.9195	157364	59.6844	16297	0.266837
574	A	3	3	100	19.5	20.244	4233	6.79093	13033	0.828478	541298	25.858	212831	2.71506	33927	1.55535	17143	0.652264	158787	61.2975	18151	0.30249
574	A	3	3	102	19.52	20.264	4085	6.37806	15012	0.928733	647265	30.0923	209525	2.60134	34230	1.52723	62187	2.30278	148722	55.8751	18150	0.294377
574	A	3	3	104	19.54	20.284	4537	6.62234	15295	0.884601	627660	27.28	224588	2.60671	37336	1.55729	68500	2.37131	166237	58.3871	19171	0.290681
574	A	3	3	106	19.56	20.304	4184	6.16045	15538	0.906507	692697	30.3697	215036	2.51765	35089	1.47636	71500	2.49679	157433	55.778	19252	0.29446
574	A	3	3	108	19.58	20.324	3926	6.29102	15544	0.986935	637832	30.4336	204377	2.60415	32188	1.47389	64130	2.43718	143945	55.5027	16253	0.270541
574	A	3	3	110	19.6	20.344	4342	6.66814	14748	0.897436	623605	28.5169	209539	2.55885	34538	1.5157	35028	1.27581	157759	58.2983	16856	0.268905
574	A	3	3	112	19.62	20.364	4088	6.57158	12827	0.817033	635097	30.4002	192829	2.46488	31883	1.4646	10317	0.39334	149062	57.6597	13692	0.228642
574	A	3	3	114	19.64	20.384	4823	7.02336	14342	0.827548	569424	24.6911	234869	2.71968	36738	1.52878	12925	0.44639	178264	62.4652	19696	0.297945
574	A	3	3	116	19.66	20.404	5471	8.40283	16391	0.997516	256018	11.7086	255861	3.12483	39674	1.74127	21216	0.772819	197245	72.8973	22237	0.354785
574	A	3	3	118	19.68	20.424	5144	8.50091	15908	1.04168	209046	10.2869	260163	3.4188	39403	1.86078	15823	0.620167	185926	73.9352	19551	0.335632
574	A	3	3	120	19.7	20.444	4927	7.98702	15158	0.973642	307361	14.8364	248389	3.20183	38161	1.76776	10996	0.422759	180737	70.5011	18382	0.309546
574	A	3	3	122	19.72	20.464	5147	9.01524	15131	1.05014	191225	9.97344	261205	3.63805	39252	1.96465	12197	0.506678	174397	73.5036	19135	0.348162
574	A	3	3	124	19.74	20.484	4981	8.65449	13653	0.939958	229576	11.8776	243524	3.36458	37983	1.88588	10595	0.436598	173424	72.5071	18492	0.333763
574	A	3	3	126	19.76	20.504	5143	8.59881	14555	0.964249	226854	11.2939	265748	3.5331	40993	1.95854	11428	0.453156	181047	72.8383	20726	0.35997
574	A	3	3	128	19.78	20.524	4829	8.84285	13472	0.977513	238803	13.0212	242292	3.52808	37830	1.97957	12164	0.528284	160662	70.7937	17281	0.328726
574	A	3	3	130	19.8	20.544	4566	7.89551	14957	1.02481	330991	17.0427	238074	3.27356	37852	1.8704	20184	0.827765	162794	67.7375	18247	0.327767
574	A	3	3	132	19.82	20.564	4865	8.181	14452	0.962957	391274	19.5921	231137	3.0907	38596	1.85467	22269	0.888137	160936	65.1213	17693	0.309069
574	A	3	3	134	19.84	20.584	4406	7.74021	13882	0.966309	430704	22.5302	214721	2.99949	34444	1.72911	37183	1.5492	147064	62.1672	17443	0.318317
574	A	3	3	136	19.86	20.604	4982	7.92361	13330	0.84005	468953	22.2088	224958	2.84502	38073	1.73036	18323	0.691149	165884	63.4849	16710	0.276074
574	A	3	3	138	19.88	20.624	4280	6.96049	13183	0.849505	555622	26.9062	205915	2.66286	33821	1.57175	29152	1.1244	152452	59.659	15735	0.265823
574	A	3	3	140	19.9	20.644	4292	7.04315	13360	0.868698	527663	25.7834	199305	2.60069	34580	1.62156	40189	1.56412	152618	60.2642	14911	0.254181
574	A	3	3	142	19.92	20.664	4221	6.96595	12910	0.844202	517629	25.4367	188232	2.47014	31567	1.48867	82995	3.24842	149324	59.2981	14455	0.247806
574	A	3	3	144	19.94	20.684	4493	7.35555	12248	0.79451	540286	26.3378	198733	2.5871	33263	1.55611	28838	1.11969	152272	59.9854	15517	0.263886
574	A	3	4	2	20.02	20.764	2932	6.50022	8518	0.748267	426036	28.1246	143568	2.53096	22823	1.4459	16643	0.875087	111587	59.5284	10706	0.246559
574	A	3	4	4	20.04	20.784	3661	6.00067	10799	0.701356	623346	30.4233	177818	2.31761	28290	1.32505	7236	0.28129	148945	58.7452	12074	0.20558
574	A	3	4	6	20.06	20.804	4091	6.49664	12322	0.775346	664615	31.4272	190046	2.39984	29921	1.3578	9627	0.362582	149067	56.9623	13233	0.218297
574	A	3	4	8	20.08	20.824	3844	6.60347	12512	0.851669	541676	27.708	205032	2.80075	31634	1.5529	9293	0.378617	144811	59.86	13707	0.244602
574	A	3	4	10	20.1	20.844	3930	6.26138	12539	0.791582	609743	28.9269	197774	2.5056	31687	1.44264	8290	0.313248	155286	59.5328	13645	0.22583
574	A	3	4	12	20.12	20.864	3804	6.3121	11661	0.766699	559181	27.6289	197501	2.60596	31048	1.4722	7479	0.294329	151987	60.6858	13581	0.234097
574	A	3	4	14	20.14	20.884	3570	6.3465	11617	0.818306	509258	26.9576	188331	2.66227	29381	1.49256	7570	0.319167	142973	61.1599	13197	0.243709
574	A	3	4	16	20.16	20.904	3492	5.53786	9355	0.587851	618030	29.1846	175754	2.21634	27330	1.23853	5687	0.213898	159379	60.8199	12203	0.201031
574	A	3	4	18	20.18	20.924	3984	6.56959	12911	0.843596	589049	28.9233	203791	2.67219	32733	1.54243	9784	0.382641	148232	58.8176	14515	0.248637
574	A	3	4	20	20.2	20.944	4151	6.59512	13616	0.857185	648960	30.7019	205032	2.59033	32765	1.48758	15136	0.570344	148970	56.9528	14830	0.24476
574	A	3	4	22	20.22	20.964	4435	6.62344	12929	0.765087	760753	33.8307	211199	2.50811	35247	1.50422	25212	0.893004	149292	53.6505	14503	0.224998
574	A	3	4	24	20.24	20.984	4164	6.54987	12856	0.801278	681144	31.9035	207939	2.60089	33812	1.51982	22908	0.854604	146704	55.5278	14826	0.242257
574	A	3	4	26	20.26	21.004	3974	6.41739	11977	0.766362	639408	30.7458	190678	2.44847	31491	1.45317	14278	0.546831	147735	57.4064	12853	0.215608
574	A	3	4	28	20.28	21.024	3878	5.87878	12649	0.759785	842749	38.0412	197967	2.38636	32423	1.40454	29712	1.06823	137692	50.2267	14886	0.234416
574	A	3	4	30	20.3	21.044	4403	6.44984	13233	0.768093	825581	36.0111	198030	2.30672	33112	1.38607	25529	0.88693	147440	51.9711	14467	0.220145
574	A	3	4	32	20.32	21.064	4074	6.17809	12930	0.77694	786802	35.5284	197645	2.38332	32292	1.39936	27553	0.990964	143958	52.531	13451	0.211894
574	A	3	4	34	20.34	21.084	4083	6.22803	12072	0.729635	770569	34.9993	192935	2.34016	32760	1.42796	28110	1.01692	144533	53.0499	13132	0.208081
574	A	3	4	36	20.36	21.104	3849	5.93478	13521	0.826078	778501	35.7432	189391	2.3221	31475	1.38683	21135	0.772885	142293	52.7943	13727	0.219868
574	A	3	4	38	20.38	21.124	4185	5.96516	13899	0.784993	834176	35.4047	193898	2.19768	32533	1.32511	22754	0.769202	155515	53.3391	14455	0.21403
574	A	3	4	40	20.4	21.144	3676	4.93244	12341	0.656134	1139683	45.5352	161757	1.72589	27122	1.03994	31756	1.01057	139128	44.9208	12837	0.178929
574	A	3	4	42	20.42	21.164	3743	5.05705	12360	0.661685	1103355	44.3884	159414	1.71265	27433	1.05914	23153	0.741892	142145	46.2121	11901	0.167029
574	A	3	4	44	20.44	21.184	3290	4.62021	11462	0.637796	1055246	44.1262	149919	1.67412	24871	0.998067	43395	1.44531	137083	46.323	12016	0.175289
574	A	3	4	46	20.46	21.204	3570	5.00821	11560	0.64258	1023804	42.7669	160233	1.78743	27370	1.09721	19428	0.646395	141851	47.8843	11457	0.166961
574	A	3	4	48	20.48	21.224	3649	5.08553	12989	0.717288	986559	40.9413	165962	1.83922	27409	1.09158	20128	0.665301	147508	49.468	13243	0.191725
574	A	3	4	50	20.5	21.244	3734	5.38912	13150	0.752011	883046	37.9493	178809	2.05209	29297	1.20828	12786	0.437657	149695	51.9873	14959	0.224272
574	A	3	4	52	20.52	21.264	3381	4.72322	12112	0.670446	991021	41.2242	168471	1.87147	27772	1.10866	10657	0.353088	148312	49.8558	13306	0.193095
574	A	3	4	54	20.54	21.284	3895	5.45248	12914	0.716313	870131	36.2701	177765	1.97878	29536	1.18151	10362	0.344022	159903	53.8629	13335	0.193914
574	A	3	4	56	20.56	21.304	4092	5.49383	11742	0.62465	978593	39.1218	171637	1.83237	29450	1.12986	8283	0.263744	158947	51.3497	13196	0.18404
574	A	3	4	58	20.58	21.324	3463	4.66523	12794	0.68294	1055084	42.3238	163515	1.75163	27456	1.05696	12092	0.386344	150971	48.9397	13822	0.193429
574	A	3	4	60	20.6	21.344	4451	5.81362	13125	0.679272	942753	36.666	179692	1.8663	30409	1.13499	20957	0.649193	168584	52.9849	15163	0.205733
574	A	3	4	62	20.62	21.364	4047	5.44488	12423	0.662273	948670	38.0056	177403	1.89793	29961	1.15189	22025	0.702792	160397	51.9276	14818	0.207097
574	A	3	4	64	20.64	21.384	3876	5.26051	13806	0.74245	902418	36.4694	171379	1.84955	28481	1.10459	29488	0.949172	163560	53.4156	14806	0.208743
574	A	3	4	66	20.66	21.404	3531	4.82506	12511	0.677411	870216	35.4086	153041	1.66294	24230	0.946147	60746	1.96869	165176	54.3123	14006	0.198815
574	A	3	4	68	20.68	21.424	3411	4.54507	12394	0.654374	839638	33.3141	152697	1.61791	22992	0.875459	62871	1.98685	177247	56.8309	12671	0.175388
574	A	3	4	70	20.7	21.444	4286	5.60714	12491	0.647503	892207	34.7562	172592	1.79545	30937	1.15656	10464	0.32467	176370	55.5214	14059	0.191062
574	A	3	4	72	20.72	21.464	4172	5.71152	11559	0.627022	895897	36.5209	167129	1.81938	28769	1.12547	7221	0.234455	163194	53.7598	14161	0.201387
574	A	3	4	74	20.74	21.484	3806	5.46355	11460	0.651848	860483	36.7812	163140	1.86222	27814	1.14096	6636	0.225927	155440	53.6928	12177	0.181583
574	A	3	4	76	20.76	21.504	3539	5.02829	10209	0.574749	858302	36.3125	154837	1.74936	25651	1.04146	5563	0.187458	160693	54.9393	11305	0.166855
574	A	3	4	78	20.78	21.524	3949	5.68299	10290	0.58676	892060	38.2262	168349	1.92648	27020	1.11116	7294	0.24895	150316	52.0525	11036	0.16498
574	A	3	4	80	20.8	21.544	3596	5.14554	11979	0.679183	866033	36.8997	164332	1.86981	27911	1.14127	32724	1.11054	153886	52.9855	11337	0.168515
574	A	3	4	82	20.82	21.564	4108	5.51984	11757	0.625961	930707	37.2379	163998	1.75226	28940	1.11121	37599	1.1982	162034	52.39	11793	0.164608
574	A	3	4	84	20.84	21.584	3960	5.68908	11577	0.65902	901291	38.5557	170710	1.95016	29560	1.21353	37505	1.27788	146029	50.4815	11597	0.17307
574	A	3	4	86	20.86	21.604	3219	4.68223	12151	0.700325	970035	42.0142	157878	1.82607	26214	1.0896	32205	1.11099	138289	48.4023	11531	0.174232
574	A	3	4	88	20.88	21.624	3304	5.05907	13080	0.793586	878999	40.0771	167061	2.03409	27771	1.21513	38709	1.40572	133580	49.2174	12443	0.197918
574	A	3	4	90	20.9	21.644	3423	5.20057	13361	0.804338	862372	39.0136	177288	2.14184	29371	1.27516	40291	1.4518	136534	49.9151	12525	0.197675
574	A	3	4	92	20.92	21.664	3236	4.73878	12928	0.750144	968124	42.2149	170202	1.98192	29133	1.21911	36300	1.26073	135181	47.6344	13149	0.200023
574	A	3	4	94	20.94	21.684	3814	5.66187	14285	0.840262	780463	34.4991	182456	2.15378	30551	1.296	40517	1.4265	150891	53.9	14425	0.222446
574	A	3	4	96	20.96	21.704	3895	5.52827	12767	0.718002	839175	35.4659	181848	2.05236	30854	1.25139	31933	1.07492	157168	53.6775	15710	0.231626
574	A	3	4	98	20.98	21.724	3347	5.35002	12957	0.820653	741701	35.3025	179292	2.2789	29277	1.33729	35652	1.35157	138662	53.334	13555	0.225076
574	A	3	4	100	21	21.744	3733	5.30668	13318	0.750169	869636	36.8111	175735	1.98649	30410	1.23533	51538	1.73759	151931	51.9706	13681	0.202028
574	A	3	4	102	21.02	21.764	4038	5.74546	12424	0.700448	850757	36.0447	173722	1.96552	30028	1.22092	20190	0.681319	156071	53.4352	13967	0.206439
574	A	3	4	104	21.04	21.784	3962	5.4171	13124	0.711007	1120050	45.6002	149870	1.62941	25558	0.998572	32459	1.05255	134986	44.4107	12707	0.180478
574	A	3	4	106	21.06	21.804	3446	4.31697	14275	0.70859	1266088	47.2285	159171	1.58559	28598	1.02376	35201	1.04586	145562	43.8792	16254	0.211521
574	A	3	4	108	21.08	21.824	3718	4.87453	10161	0.527856	1038393	40.538	155325	1.61931	25947	0.9721	14761	0.458981	161156	50.8413	12330	0.167925
574	A	3	4	112	21.12	21.864	3806	5.17282	13250	0.713558	1056878	42.772	167485	1.81008	28638	1.11225	32448	1.04593	144259	47.1789	13772	0.19444
574	A	3	4	114	21.14	21.884	2997	4.00131	12212	0.646037	1201128	47.7509	145782	1.54769	26284	1.00278	33444	1.05898	136477	43.8451	10616	0.147233
574	A	3	4	116	21.16	21.904	3310	4.45448	11771	0.62768	1180767	47.3163	141375	1.51288	25079	0.96445	23926	0.763651	136542	44.2163	10323	0.144313
574	A	3	4	118	21.18	21.924	2779	3.88435	10153	0.562315	1242635	51.719	129718	1.44176	22346	0.892544	15200	0.503882	121519	40.8715	8586	0.124667
574	A	3	4	120	21.2	21.944	2196	3.83318	9738	0.673522	967480	50.2858	112987	1.56826	18532	0.924378	29909	1.23818	98390	41.3261	8302	0.150536
574	A	3	4	122	21.22	21.964	2563	3.69896	11857	0.678048	1154961	49.6335	121695	1.39658	22432	0.925122	54823	1.8765	119914	41.6435	9861	0.147836
574	A	3	4	124	21.24	21.984	2503	3.3449	11873	0.628693	1342725	53.4302	113050	1.20132	20664	0.78911	66874	2.11951	119284	38.3576	9269	0.128672
574	A	3	4	126	21.26	22.004	2274	3.02778	10958	0.578123	1369828	54.3096	106546	1.12807	19976	0.760051	69717	2.20155	118231	37.8801	8292	0.114689
574	A	3	4	128	21.28	22.024	3332	4.35687	10937	0.566661	1260872	49.0928	125052	1.30024	23258	0.869045	35211	1.09195	135366	42.5918	9623	0.13071
574	A	3	4	130	21.3	22.044	2510	3.30833	10520	0.549423	1363011	53.4948	111256	1.16607	21124	0.795632	54289	1.69708	122554	38.8696	8699	0.119106
574	A	3	4	132	21.32	22.064	2976	4.23429	10089	0.568789	1185596	50.2298	124100	1.40405	21752	0.884397	17619	0.594545	122529	41.9501	9065	0.133982
574	A	3	4	134	21.34	22.084	3131	4.48251	13876	0.787151	911596	38.8613	137568	1.5661	23436	0.958787	127091	4.31528	141845	48.8651	11011	0.163755
574	A	3	4	136	21.36	22.104	2947	4.49505	13012	0.786419	698533	31.7262	141949	1.72167	23439	1.02163	189685	6.86188	144965	53.2065	11401	0.180646
574	A	3	4	138	21.38	22.124	3002	4.4058	13157	0.765115	844958	36.9255	141524	1.65161	23956	1.00468	54886	1.91043	150556	53.1691	11003	0.167747
574	A	3	4	140	21.4	22.144	3175	4.64867	12781	0.741491	778818	33.9546	157573	1.83456	26394	1.10431	33575	1.16589	159985	56.3652	12182	0.185282
574	A	3	4	142	21.42	22.164	2965	4.23701	11657	0.66005	904851	38.5025	156683	1.78041	24401	0.99642	11730	0.397547	154875	53.2552	11511	0.170874
574	A	3	4	144	21.44	22.184	3173	5.05204	10301	0.649877	607772	28.8147	144492	1.82938	22124	1.00661	6951	0.262482	162379	62.2118	10464	0.173071
574	A	3	4	146	21.46	22.204	3516	5.76501	9828	0.638516	629576	30.738	153904	2.00662	25668	1.20266	7539	0.293171	149990	59.178	10450	0.177991
574	A	3	4	148	21.48	22.224	2868	5.29219	8761	0.640568	607353	33.3714	127385	1.86912	21768	1.14782	6852	0.299867	128814	57.196	9549	0.183039
574	A	3	5	4	21.54	22.284	2770	4.78462	8398	0.574777	722600	37.1657	115403	1.58507	21658	1.06902	8151	0.333914	130720	54.3321	8626	0.154777
574	A	3	5	6	21.56	22.304	2936	4.85219	10055	0.658445	833743	41.029	119085	1.56496	21805	1.02977	10677	0.418492	126474	50.2956	8825	0.151505
574	A	3	5	8	21.58	22.324	2627	4.28616	7267	0.469806	747259	36.3042	107522	1.39499	18598	0.867112	6837	0.264563	143345	56.2778	7987	0.13537
574	A	3	5	10	21.6	22.344	2898	4.38078	12084	0.723801	978192	44.0305	123445	1.48385	20386	0.880613	33959	1.21748	129563	47.1282	9858	0.1548
574	A	3	5	12	21.62	22.364	2508	4.06811	11304	0.726528	852370	41.169	124563	1.60664	20726	0.960685	17781	0.684033	129697	50.6223	9659	0.162752
574	A	3	5	14	21.64	22.384	3054	4.73767	11129	0.68408	826425	38.1747	128419	1.58412	22658	1.00443	38338	1.41052	139946	52.2399	10208	0.1645
574	A	3	5	16	21.66	22.404	3306	5.3253	11979	0.764569	802315	38.4824	130501	1.67155	22145	1.01933	22946	0.876604	133353	51.6881	10288	0.172148
574	A	3	5	18	21.68	22.424	2720	4.0777	10874	0.645938	916473	40.9112	132948	1.58486	21652	0.927565	18808	0.66872	141462	51.0308	9838	0.153208
574	A	3	5	20	21.7	22.444	2672	3.62027	12241	0.657169	1020339	41.1648	124184	1.33793	21595	0.836101	44442	1.42809	155880	50.8209	9573	0.134736
574	A	3	5	22	21.72	22.464	2684	3.46032	10739	0.548597	872214	33.4837	108896	1.11637	17866	0.658206	76165	2.32887	187883	58.2865	8766	0.117399
574	A	3	5	26	21.76	22.504	2507	4.04682	8915	0.570211	743146	35.7199	93268	1.19717	15383	0.709579	36594	1.40096	144737	56.2193	8115	0.136075
574	A	3	5	28	21.78	22.524	2426	3.97495	8962	0.581837	676018	32.982	105522	1.37483	17358	0.812721	47557	1.84804	147813	58.2774	8708	0.148214
574	A	3	5	30	21.8	22.544	1618	2.61935	5279	0.338627	487380	23.4941	64230	0.82683	9417	0.43564	59658	2.29054	179484	69.9176	4594	0.0772565
574	A	3	5	32	21.82	22.564	1858	3.1126	7451	0.494592	571637	28.5151	81087	1.08017	12508	0.598778	28668	1.13902	161133	64.9544	6057	0.105406
574	A	3	5	34	21.84	22.584	2241	3.82337	7319	0.49478	269790	13.7059	93553	1.26919	13606	0.663339	99834	4.0396	184819	75.8749	7276	0.128952
574	A	3	5	36	21.86	22.604	2312	3.66556	7930	0.498174	369151	17.4274	93737	1.18176	15146	0.6862	44502	1.67335	195924	74.7458	7390	0.12171
574	A	3	5	40	21.9	22.644	1957	2.58281	5685	0.297295	694993	27.3123	81396	0.854217	11101	0.418662	5687	0.178008	215014	68.2833	5355	0.0734159
574	A	3	5	42	21.92	22.664	2097	2.93406	5744	0.31845	776402	32.3471	82782	0.921024	13135	0.525172	5476	0.181715	186192	62.6872	5870	0.0853177
574	A	3	5	44	21.94	22.684	1854	3.09239	3849	0.254383	246935	12.2643	85272	1.13098	10369	0.494222	7566	0.2993	205258	82.3818	4769	0.0826307
574	A	3	5	46	21.96	22.704	2210	3.65745	5587	0.36637	352232	17.3577	96357	1.26804	12250	0.579325	4890	0.191933	192012	76.4646	6665	0.114582
574	A	3	5	48	21.98	22.724	2973	5.16577	9679	0.666387	434824	22.4973	146386	2.02257	23415	1.16261	8728	0.359676	162505	67.9444	10040	0.181219
574	A	3	5	50	22	22.744	3270	5.65031	9387	0.642697	506247	26.0474	155201	2.13247	25195	1.24405	7065	0.289529	153462	63.8075	10366	0.186065
574	A	3	5	52	22.02	22.764	3257	5.62151	7842	0.536312	559874	28.7741	151529	2.07967	25560	1.26066	6190	0.253385	147574	61.2903	10263	0.184009
574	A	3	5	54	22.04	22.784	2979	5.31498	8695	0.61469	561183	29.8135	152513	2.16372	24996	1.27439	7299	0.308852	140499	60.3185	10326	0.191378
574	A	3	5	56	22.06	22.804	3115	5.49203	7977	0.557275	567097	29.7721	144483	2.02561	25040	1.26156	6113	0.255614	142489	60.4509	10098	0.184944
574	A	3	5	58	22.08	22.824	3030	5.4436	8488	0.604233	550424	29.4454	137504	1.96437	24106	1.23757	5682	0.242103	140815	60.875	10060	0.187746
574	A	3	5	60	22.1	22.844	3060	5.36287	8925	0.619783	631172	32.9382	158401	2.20748	25983	1.30126	9956	0.413825	135064	56.959	10853	0.197586
574	A	3	5	62	22.12	22.864	2620	4.42401	10043	0.671945	731268	36.7678	133691	1.79507	21895	1.05648	19307	0.773188	133741	54.3408	9730	0.17067
574	A	3	5	64	22.14	22.884	2847	4.09305	12356	0.70387	875653	37.4859	147967	1.69156	24269	0.997038	19402	0.661548	156691	54.2063	10760	0.160695
574	A	3	5	66	22.16	22.904	2663	3.89514	14895	0.863273	979396	42.6567	131417	1.52851	21601	0.902872	44134	1.53102	137684	48.4599	10702	0.16261
574	A	3	5	68	22.18	22.924	2451	3.67586	12421	0.738121	930766	41.5655	136702	1.63025	21960	0.941127	30273	1.07678	139156	50.2185	9877	0.153876
574	A	3	5	70	22.2	22.944	2427	3.69296	13285	0.800981	914467	41.4334	136212	1.6481	20510	0.891808	25872	0.933664	137773	50.4447	9767	0.154382
574	A	3	5	72	22.22	22.964	2492	3.57287	14184	0.805792	847040	36.1618	131517	1.49939	18961	0.776838	51262	1.74309	160221	55.2758	11040	0.164425
574	A	3	5	74	22.24	22.984	2716	3.68247	14020	0.753205	848727	34.2653	129822	1.39966	21144	0.819214	64632	2.07832	174242	56.8472	10980	0.154647
574	A	3	5	76	22.26	23.004	2550	3.91648	11722	0.713367	803863	36.7633	122759	1.49925	19143	0.840168	46152	1.68113	147297	54.4373	9338	0.148984
574	A	3	5	78	22.28	23.024	2261	3.39809	12934	0.770234	873053	39.0708	121657	1.4539	18575	0.797744	62192	2.21679	144205	52.1508	9073	0.141649
574	A	3	5	80	22.3	23.044	1992	3.19711	11723	0.745526	705007	33.6929	113870	1.45325	16144	0.740423	102547	3.90344	145324	56.1245	8568	0.142849
574	A	3	5	82	22.32	23.064	1626	3.11446	8679	0.6587	571168	32.5764	91723	1.39703	13131	0.718722	82521	3.74872	125081	57.6502	6824	0.135779
574	A	3	5	86	22.36	23.104	1964	3.03005	10196	0.623295	600237	27.5745	105348	1.2924	14691	0.647679	69669	2.5492	172833	64.1625	7507	0.120311
574	A	3	5	88	22.38	23.124	1784	3.10278	9591	0.660961	404219	20.9339	88393	1.22247	12091	0.600924	112175	4.6271	164248	68.739	6244	0.11281
574	A	3	5	90	22.4	23.144	2152	3.00759	10206	0.565181	460411	19.1602	95831	1.06499	12146	0.485077	107999	3.57975	214227	72.044	6425	0.0932781
574	A	3	5	92	22.42	23.164	2052	2.88519	9634	0.536733	671421	28.1105	100577	1.1245	13665	0.549043	73785	2.46048	189827	64.2245	7466	0.109047
574	A	3	5	94	22.44	23.184	1847	2.68486	9550	0.550064	571882	24.7536	99143	1.14599	13004	0.540172	54798	1.88919	195270	68.3025	8851	0.133652
574	A	3	5	96	22.46	23.204	1803	2.90993	6903	0.441449	352350	16.9332	74010	0.94982	9235	0.425916	92493	3.54039	192274	74.6714	7632	0.127954
574	A	3	5	98	22.48	23.224	1532	2.64559	4688	0.32078	277333	14.2608	63757	0.8755	7026	0.346715	85822	3.51494	187570	77.9425	5198	0.093246
574	A	3	5	100	22.5	23.244	1472	3.01389	5159	0.418544	317186	19.338	58372	0.950361	7690	0.449932	68677	3.33493	146952	72.4006	4408	0.0937544
574	A	3	5	104	22.54	23.284	2051	3.39327	8755	0.573938	566681	27.917	76962	1.0125	11725	0.554327	35260	1.38354	163426	65.061	6075	0.104407
574	A	3	5	106	22.56	23.304	1998	3.51347	9551	0.665495	365466	19.1366	106045	1.48284	15273	0.767477	53717	2.24031	170260	72.0444	8180	0.149425
574	A	3	5	108	22.58	23.324	1686	2.85118	6584	0.441177	457816	23.0534	78600	1.05695	10987	0.530942	80053	3.21071	168971	68.7585	5527	0.0970928
574	A	3	5	110	22.6	23.344	2051	3.60738	9243	0.644162	441185	23.106	101244	1.41599	14294	0.718424	42806	1.78561	162065	68.5903	7234	0.132171
574	A	3	5	112	22.62	23.364	2150	3.83253	8825	0.623328	408760	21.6966	104035	1.47465	15405	0.784709	42150	1.78197	162431	69.6726	7213	0.133565
574	A	3	5	114	22.64	23.384	2151	3.96052	9155	0.667922	437330	23.9772	101337	1.48369	14545	0.765291	53331	2.32888	150498	66.6791	7184	0.137407
574	A	3	5	116	22.66	23.404	1975	3.30611	8306	0.550932	516218	25.7312	97890	1.30302	14367	0.687253	40138	1.59354	165582	66.6976	7496	0.13035
574	A	3	5	120	22.7	23.444	2128	3.45634	9850	0.633923	540389	26.1353	100481	1.29775	15354	0.712634	57222	2.20426	167404	65.427	7866	0.132718
574	A	3	5	122	22.72	23.464	1712	3.4379	7405	0.589211	397376	23.7612	80871	1.29136	12205	0.700371	43194	2.05716	140805	68.0385	5958	0.124285
574	A	3	5	124	22.74	23.484	2257	3.71123	10260	0.668481	525500	25.7298	104669	1.36857	15773	0.741141	58080	2.265	165246	65.3828	7784	0.132959
574	A	3	5	126	22.76	23.504	2240	3.54977	9682	0.607956	536028	25.2939	100447	1.26576	15371	0.696072	60173	2.26156	173602	66.1992	7638	0.125736
574	A	3	5	128	22.78	23.524	2332	3.57367	9518	0.577946	587332	26.8007	97952	1.19361	14813	0.648679	59736	2.17109	176055	64.9204	7151	0.113837
574	A	3	5	130	22.8	23.544	2131	3.34554	9614	0.598056	598087	27.9591	99808	1.24598	14938	0.670155	57408	2.13752	169211	63.9231	7392	0.120552
574	A	3	5	134	22.84	23.584	1560	2.99577	8155	0.620531	480655	27.4849	83933	1.28168	12433	0.682276	46731	2.12836	139971	64.6798	6350	0.126674
574	A	3	5	136	22.86	23.604	1803	3.7414	7184	0.59069	428395	26.4703	77294	1.2754	11286	0.669235	54642	2.68918	129054	64.4401	5738	0.123688
574	A	3	5	138	22.88	23.624	1588	3.29435	7024	0.577377	435954	26.93	78316	1.29192	11489	0.681086	41448	2.03929	130345	65.067	5521	0.118978
574	A	3	5	140	22.9	23.644	1427	3.45134	6118	0.586312	302396	21.7779	69409	1.33488	9970	0.689064	35572	2.04046	120261	69.9899	5180	0.130144
574	A	3	5	142	22.92	23.664	1561	3.09193	7755	0.608645	419402	24.7363	85972	1.35409	12591	0.712668	43152	2.02714	141268	67.3313	6704	0.13794
574	A	3	5	144	22.94	23.684	1714	3.17498	8006	0.587626	475707	26.2389	86862	1.27945	12608	0.667385	57894	2.54343	146693	65.3862	6342	0.122035
574	A	3	5	146	22.96	23.704	344	2.11482	2260	0.550528	186215	34.0884	32196	1.57391	2258	0.396679	19363	2.82321	39377	58.2511	3152	0.201294
574	A	3	5	148	22.98	23.724	83	0.966495	1483	0.684255	108270	37.5411	18932	1.753	17	0.0056568	12686	3.5035	19739	55.3087	1962	0.237329
574	A	3	6	2	23.02	23.764	1862	3.50038	7543	0.561869	450949	25.2429	83726	1.25158	12017	0.645553	54635	2.43592	146429	66.2383	6321	0.123439
574	A	3	6	4	23.04	23.784	1636	3.09599	8434	0.63242	518178	29.1993	84723	1.27492	12754	0.689705	51730	2.32175	137622	62.6688	5959	0.117144
574	A	3	6	6	23.06	23.804	1861	3.47346	7903	0.584472	467369	25.9748	83593	1.24065	12458	0.664454	49095	2.17325	146414	65.7575	6777	0.131396
574	A	3	6	8	23.08	23.824	2058	3.92494	7620	0.575835	435250	24.7174	83272	1.26285	11984	0.653115	53616	2.42514	144520	66.3227	5957	0.118017
574	A	3	6	10	23.1	23.844	1760	3.35713	7453	0.563303	431407	24.503	82889	1.25724	12201	0.665046	62712	2.83702	145294	66.6884	6502	0.128835
574	A	3	6	12	23.12	23.864	2978	4.40342	9783	0.573182	814934	35.881	114547	1.34683	19261	0.81385	33217	1.16488	156488	55.6792	8963	0.137673
574	A	3	6	14	23.14	23.884	2515	3.98663	9715	0.610191	659454	31.1264	104536	1.31764	16787	0.760398	55392	2.08243	157277	59.9901	7664	0.126198
574	A	3	6	16	23.16	23.904	2504	4.04387	9909	0.634087	668297	32.1373	109004	1.39981	18733	0.864512	47726	1.82799	151678	58.943	8903	0.149358
574	A	3	6	18	23.18	23.924	2364	4.08476	9631	0.659396	616789	31.7346	102471	1.40794	16184	0.799108	52566	2.15417	141939	59.0157	8042	0.144349
574	A	3	6	20	23.2	23.944	1858	3.40253	8596	0.623746	562500	30.6729	89997	1.31053	14257	0.746078	52584	2.28384	138037	60.8272	6997	0.133106
574	A	3	6	22	23.22	23.964	2294	3.85188	8909	0.592739	682619	34.1298	94726	1.26477	15858	0.7609	47739	1.90111	141970	57.3617	7859	0.137081
574	A	3	6	24	23.24	23.984	2249	3.74833	8014	0.52924	568175	28.1973	96233	1.27537	15022	0.715445	60743	2.40104	157092	63.0012	7630	0.1321
574	A	3	6	26	23.26	24.004	2111	3.74266	9590	0.6737	609236	32.1629	100446	1.41608	15601	0.790397	41769	1.75631	139030	59.3127	7890	0.145311
574	A	3	6	30	23.3	24.044	2644	4.20229	9955	0.626934	698073	33.0372	108941	1.37683	18677	0.848267	50128	1.88956	151313	57.8692	9069	0.149732
574	A	3	6	32	23.32	24.064	2329	3.77949	9781	0.62893	660575	31.92	103774	1.33911	16823	0.780131	52262	2.01143	152150	59.4131	7581	0.127797
574	A	3	6	34	23.34	24.084	2187	3.68362	8993	0.600186	610940	30.6409	100687	1.34854	16161	0.777848	46111	1.84199	150426	60.9671	7991	0.139816
574	A	3	6	36	23.36	24.104	2399	3.91585	9154	0.592055	619486	30.1095	101235	1.31398	16030	0.747704	48614	1.88197	156100	61.312	7486	0.126933
574	A	3	6	38	23.38	24.124	2470	4.0701	10238	0.668464	642992	31.5493	105856	1.38703	17083	0.8044	43321	1.69302	150556	59.697	7633	0.130657
574	A	3	6	42	23.42	24.164	2299	4.04751	9296	0.648486	633242	33.1967	103100	1.44335	17265	0.868592	37611	1.57043	137103	58.0821	7807	0.142778
574	A	3	6	44	23.44	24.184	2602	4.1316	9428	0.59318	699717	33.0834	104714	1.32215	17236	0.782075	46301	1.74364	152364	58.2157	7771	0.128179
574	A	3	6	46	23.46	24.204	2727	4.01117	10429	0.607833	793962	34.7747	111039	1.29875	19652	0.826026	42223	1.47296	160685	56.8733	8854	0.135287
574	A	3	6	50	23.5	24.244	2386	3.97758	9391	0.62032	575268	28.5559	96376	1.27756	15105	0.719565	51818	2.04873	156242	62.6748	7246	0.125481
574	A	3	6	52	23.52	24.264	2326	3.89832	8366	0.555574	527402	26.3201	92887	1.2379	14281	0.683955	55796	2.21782	161089	64.9652	6959	0.121156
574	A	3	6	54	23.54	24.284	2362	4.40124	8474	0.625661	579552	32.1562	92124	1.365	14095	0.750517	46939	2.07436	130460	58.4951	6817	0.131953
574	A	3	6	58	23.58	24.324	2636	4.26955	8965	0.575363	638571	30.798	108522	1.39771	17587	0.814008	40746	1.56523	155095	60.4478	7865	0.132332
574	A	3	6	60	23.6	24.344	2451	4.2601	8398	0.578372	490129	25.3667	90123	1.24559	13965	0.693613	52652	2.17043	156766	65.5654	6638	0.119851
574	A	3	6	62	23.62	24.364	1929	3.46666	6703	0.477313	464510	24.8571	84451	1.20683	13291	0.682554	46654	1.98849	155409	67.205	6214	0.116006
574	A	3	6	64	23.64	24.384	2070	3.45207	7801	0.515484	493567	24.5094	89638	1.18868	14131	0.673415	55994	2.21466	167794	67.3337	6501	0.112621
574	A	3	6	66	23.66	24.404	2446	4.00677	7724	0.501344	490366	23.9186	93364	1.21613	15139	0.708656	49144	1.90926	171562	67.6247	6731	0.114537
574	A	3	6	68	23.68	24.424	2106	3.60475	7636	0.517891	540580	27.552	87318	1.18846	13782	0.674108	43599	1.7699	156798	64.5809	6299	0.112
574	A	3	6	70	23.7	24.444	2138	3.56903	7243	0.479089	538938	26.7891	90164	1.19685	14280	0.681194	47643	1.88624	162502	65.2751	7115	0.123381
574	A	3	6	72	23.72	24.464	2285	3.82014	8120	0.537904	549336	27.3469	86836	1.1544	13893	0.663727	37415	1.48352	161263	64.8746	6842	0.118825
574	A	3	6	76	23.76	24.504	2039	3.42393	8099	0.538883	484647	24.2331	89036	1.18888	13714	0.65807	55466	2.20897	167380	67.6328	6611	0.11532
574	A	3	6	78	23.78	24.524	2541	4.21874	7308	0.480764	468007	23.137	89282	1.17871	12460	0.591149	49066	1.93203	171078	68.347	6645	0.114605
574	A	3	6	80	23.8	24.544	1056	3.29518	3367	0.416307	243668	22.6407	49298	1.22323	5234	0.466712	35484	2.62605	92164	69.2026	3985	0.129173
574	A	3	6	82	23.82	24.564	1253	3.42119	5643	0.610508	334574	27.2016	72572	1.57565	7441	0.580574	31755	2.05633	98032	64.408	5151	0.146099
574	A	4	1	56	24.46	26.204	2123	3.53793	8342	0.550839	621966	30.8633	100616	1.33331	15140	0.720984	7129	0.281763	156086	62.5907	6998	0.121144
574	A	4	1	58	24.48	26.224	2759	4.66525	7228	0.48428	535305	26.9526	120324	1.61785	20501	0.9906	5635	0.225981	159530	64.91	8731	0.153362
574	A	4	1	60	24.5	26.244	2014	3.61089	3851	0.273579	304480	16.2551	95107	1.35591	12014	0.615521	10095	0.429256	179300	77.3538	5689	0.105955
574	A	4	1	62	24.52	26.264	2031	3.54152	7657	0.529047	360687	18.7278	95599	1.32555	13982	0.696706	62283	2.57576	172687	72.458	8039	0.145617
574	A	4	1	64	24.54	26.284	1842	2.93679	4242	0.267984	394946	18.7499	78743	0.998296	9609	0.437786	4756	0.179838	198993	76.3427	5237	0.0867352
574	A	4	1	66	24.56	26.304	2613	3.57365	5355	0.290193	383878	15.633	99119	1.07794	13465	0.526234	5389	0.174798	238951	78.6372	6125	0.0870178
574	A	4	1	68	24.58	26.324	3167	4.28734	6630	0.355638	498461	20.0931	112741	1.21363	17624	0.68178	6323	0.203011	224210	73.0367	9155	0.128744
574	A	4	1	70	24.6	26.344	3015	4.33466	6722	0.382932	368336	15.7684	122925	1.40531	17809	0.731657	7012	0.239092	222458	76.9595	11947	0.178425
574	A	4	1	72	24.62	26.364	3640	5.59013	10342	0.629332	597443	27.3208	155621	1.90043	26014	1.14164	8195	0.298487	170267	62.9212	12408	0.197948
574	A	4	1	74	24.64	26.384	3589	5.37112	12307	0.729792	976664	43.5225	143239	1.70458	26475	1.13221	6888	0.244478	130830	47.1135	11699	0.181874
574	A	4	1	76	24.66	26.404	4236	6.38205	12756	0.761507	860858	38.62	175380	2.10111	30799	1.32599	8760	0.313014	138644	50.2634	14882	0.232914
574	A	4	1	78	24.68	26.424	3959	5.98207	14745	0.882808	834883	37.5637	194089	2.33201	31441	1.35757	9052	0.324389	141155	51.3226	14958	0.234784
574	A	4	1	80	24.7	26.444	3514	5.48556	13097	0.810114	856367	39.8067	185402	2.30143	30995	1.38265	8669	0.320955	132201	49.6593	14390	0.233351
574	A	4	1	82	24.72	26.464	3706	5.82804	13881	0.864955	774463	36.2656	200278	2.50446	32510	1.46095	9482	0.353649	138641	52.4633	15860	0.25909
574	A	4	1	84	24.74	26.484	3445	6.04901	13012	0.905304	652501	34.1156	197349	2.75546	29873	1.4989	9646	0.401696	127895	54.0375	12970	0.236573
574	A	4	1	86	24.76	26.504	2851	5.6029	9682	0.753939	682560	39.9423	151386	2.36573	23555	1.32282	8215	0.382894	104507	49.4206	10228	0.208803
574	A	4	1	90	24.8	26.544	3094	5.71642	13033	0.954121	631613	34.7482	194559	2.85837	29093	1.53601	9029	0.395639	120418	53.5355	13327	0.25578
574	A	4	1	92	24.82	26.564	4113	7.35283	16680	1.18154	442971	23.5802	195001	2.77202	32380	1.65414	31449	1.33339	143766	61.8441	15171	0.281734
574	A	4	1	94	24.84	26.584	3578	6.13945	14063	0.956142	589137	30.1011	184259	2.5141	31149	1.52733	25693	1.04559	139199	57.4741	13589	0.242218
574	A	4	1	96	24.86	26.604	3980	6.97751	14229	0.988433	484348	25.2843	193362	2.69558	32553	1.63083	29206	1.21435	144522	60.9674	13262	0.241522
574	A	4	1	98	24.88	26.624	2024	6.46509	6124	0.775094	270159	25.6957	109468	2.78045	15451	1.41033	32447	2.45807	78216	60.1182	8953	0.297072
574	A	4	1	100	24.9	26.644	3812	6.82569	13631	0.967112	454922	24.2553	178121	2.53614	30659	1.56874	47030	1.99721	142985	61.6071	13047	0.24268
574	A	4	1	102	24.92	26.664	3634	6.82074	13258	0.986006	388783	21.7285	172337	2.57211	29838	1.60036	44918	1.9995	141755	64.0223	13871	0.270448
574	A	4	1	104	24.94	26.684	3177	5.50947	11438	0.785956	670280	34.6119	150580	2.07646	26625	1.31942	11123	0.457478	131900	55.0407	11024	0.198592
574	A	4	1	106	24.96	26.704	3176	6.04277	13236	0.997855	467890	26.5079	174760	2.644	29086	1.58139	24388	1.10049	132956	60.8709	12884	0.254645
574	A	4	1	108	24.98	26.724	3599	6.31517	13223	0.919366	482214	25.1953	167296	2.33428	29095	1.45889	75305	3.13388	143052	60.4009	13288	0.24221
574	A	4	1	112	25.02	26.764	3197	6.16755	10923	0.834963	375245	21.5557	152039	2.33232	25499	1.4057	119571	5.47081	133580	62.0095	11154	0.223527
574	A	4	1	114	25.04	26.784	3387	6.21533	11295	0.821278	469146	25.635	154683	2.25712	26645	1.39722	47856	2.08277	138958	61.3591	12179	0.232161
574	A	4	1	116	25.06	26.804	3231	5.81729	11271	0.804084	418166	22.4186	154644	2.21402	26104	1.34305	138292	5.90523	141423	61.2704	12154	0.227317
574	A	4	1	118	25.08	26.824	3188	6.32439	8998	0.707297	424245	25.0608	146063	2.30412	23358	1.32415	32267	1.51815	131020	62.5439	10543	0.217267
574	A	4	1	120	25.1	26.844	3449	6.34093	10695	0.779105	444046	24.3089	166698	2.43699	28170	1.47995	18235	0.795099	143839	63.6331	11831	0.225949
574	A	4	1	122	25.12	26.864	3767	6.66685	10255	0.719144	472930	24.9229	172735	2.43091	28763	1.45465	10312	0.432836	148284	63.1489	12172	0.223778
574	A	4	1	124	25.14	26.884	3832	6.49438	10931	0.734053	493052	24.8818	166594	2.2451	27717	1.34233	14836	0.596327	155670	63.4839	12617	0.222125
574	A	4	1	126	25.16	26.904	3666	6.09293	9453	0.622528	474349	23.4752	164129	2.16912	26716	1.26884	9184	0.362011	164542	65.8047	11856	0.204692
574	A	4	1	130	25.2	26.944	3440	5.93817	8726	0.596849	440013	22.6171	146822	2.01534	23642	1.16622	8842	0.361993	161565	67.1101	10832	0.194237
574	A	4	1	132	25.22	26.964	3078	5.36874	6964	0.481302	446108	23.1697	138528	1.92135	21849	1.08902	7511	0.310712	160794	67.487	9499	0.172112
574	A	4	1	134	25.24	26.984	3833	7.03209	9024	0.655994	521507	28.4894	168688	2.4609	28919	1.5161	8535	0.371368	134211	59.2489	11821	0.225284
574	A	4	1	136	25.26	27.004	3115	5.80646	8005	0.591248	565206	31.3716	141846	2.10249	23431	1.24809	6924	0.306102	130157	58.3804	9996	0.193557
574	A	4	1	138	25.28	27.024	3557	7.23996	8270	0.66698	525702	31.8617	146308	2.36801	25099	1.45985	8574	0.413896	113874	55.7729	10249	0.216702
574	A	4	1	140	25.3	27.044	3437	6.56158	8252	0.624228	559030	31.7791	144594	2.19504	25302	1.38033	8195	0.371051	123822	56.8818	10433	0.206904
574	A	4	1	142	25.32	27.064	3500	6.52866	10513	0.777031	601015	33.3825	165394	2.45324	29586	1.57704	8824	0.390371	121787	54.6643	11708	0.226866
574	A	4	1	144	25.34	27.084	2761	4.99465	7524	0.539315	704225	37.9338	132909	1.91186	23459	1.21269	6307	0.270593	121682	52.9677	9011	0.169333
574	A	4	1	146	25.36	27.104	2401	5.14109	6043	0.512709	614482	39.1786	113671	1.93543	19969	1.22186	5593	0.28403	100054	51.5518	7842	0.174429
574	A	4	1	148	25.38	27.124	2396	6.60827	6139	0.670894	430623	35.3651	98751	2.16574	16305	1.28506	6083	0.397901	80340	53.3187	6572	0.188291
574	A	4	2	2	25.42	27.164	3628	6.6045	8411	0.606703	589038	31.9296	136619	1.97764	24137	1.25561	8298	0.358263	130322	57.087	9557	0.180727
574	A	4	2	4	25.44	27.184	3465	6.15682	9246	0.650972	679399	35.9463	143278	2.0244	26554	1.34829	9078	0.382559	124648	53.2948	10608	0.195802
574	A	4	2	6	25.46	27.204	3488	6.29338	9983	0.713713	655785	35.2327	150582	2.16045	27378	1.41159	9517	0.407252	123381	53.5676	11384	0.213369
574	A	4	2	8	25.48	27.224	4202	6.73031	9734	0.617768	667343	31.8277	162768	2.07306	30904	1.41447	8538	0.324333	147378	56.8013	12689	0.211123
574	A	4	2	10	25.5	27.244	4205	6.53688	11405	0.702515	728216	33.7087	171069	2.11466	32564	1.44658	10079	0.371602	146806	54.9155	12604	0.203537
574	A	4	2	12	25.52	27.264	4541	7.19444	12971	0.814281	514677	24.2805	191765	2.4159	35119	1.58997	24415	0.917398	164037	62.5365	15251	0.251
574	A	4	2	14	25.54	27.284	4270	6.65179	13144	0.811323	633021	29.3634	177899	2.20368	32886	1.46394	14551	0.5376	156698	58.7382	14216	0.230048
574	A	4	2	16	25.56	27.304	4952	8.09848	13724	0.889321	332519	16.1926	212283	2.76059	36097	1.68692	22574	0.875562	175910	69.2245	16015	0.272069
574	A	4	2	18	25.58	27.324	5044	8.10497	12954	0.824776	271632	12.9967	213013	2.72174	37234	1.70969	34705	1.32259	186348	72.0523	16007	0.267188
574	A	4	2	20	25.6	27.344	4561	7.9577	11542	0.797929	303133	15.7484	200364	2.77979	34632	1.72666	36900	1.5269	164839	69.2045	14240	0.258088
574	A	4	2	22	25.62	27.364	4419	7.33715	11586	0.762241	465582	23.0185	180846	2.38768	33022	1.56678	27935	1.10004	159166	63.5917	13679	0.235932
574	A	4	2	24	25.64	27.384	4872	8.96747	10806	0.788103	262985	14.4135	208785	3.05581	36386	1.9138	19227	0.839325	157443	69.7321	15159	0.289843
574	A	4	2	26	25.66	27.404	4961	9.29777	11487	0.853044	283524	15.8225	215937	3.21811	38901	2.08339	11369	0.505344	150598	67.9165	15578	0.303285
574	A	4	2	28	25.68	27.424	4892	8.11392	9770	0.642088	414302	20.4615	205480	2.71005	37097	1.75826	8646	0.340107	164703	65.7344	13910	0.239663
574	A	4	2	30	25.7	27.444	4929	9.05928	11581	0.843405	322837	17.6683	216042	3.15745	39026	2.0497	9690	0.422391	150392	66.5129	15007	0.286522
574	A	4	2	32	25.72	27.464	4978	8.80853	9474	0.664259	367622	19.3699	212581	2.99114	37831	1.91292	8153	0.342154	154190	65.6525	14071	0.258644
574	A	4	2	34	25.74	27.484	5130	8.88527	8782	0.602701	425897	21.9652	218106	3.0039	39406	1.95037	7176	0.294775	151255	63.039	14383	0.258781
574	A	4	2	36	25.76	27.504	4578	8.12355	8168	0.574303	436086	23.042	200226	2.82524	36787	1.86537	6204	0.261094	147684	63.0595	13509	0.249014
574	A	4	2	38	25.78	27.524	4623	8.69456	8809	0.656456	397287	22.2487	201831	3.01839	36034	1.93658	6494	0.289662	138958	62.886	13804	0.269686
574	A	4	2	40	25.8	27.544	4920	8.05875	10188	0.661221	608272	29.6672	195313	2.54389	37454	1.75308	7990	0.310388	144037	56.7706	13803	0.234858
574	A	4	2	42	25.82	27.564	4516	6.88049	10553	0.637084	823681	37.3681	173492	2.10188	34568	1.50501	7958	0.287558	139157	51.0172	12802	0.202616
574	A	4	2	44	25.84	27.584	4939	7.48544	10634	0.638602	778469	35.1315	180653	2.17714	35181	1.52365	7792	0.28008	144145	52.5683	12404	0.195285
574	A	4	2	46	25.86	27.604	4860	7.77195	10078	0.638592	734717	34.9857	179491	2.28244	35446	1.6198	8030	0.304554	135609	52.183	12882	0.213997
574	A	4	2	48	25.88	27.624	4308	6.88476	10376	0.65705	781576	37.193	171960	2.18527	33192	1.51582	8225	0.311749	132712	51.0352	13082	0.217179
574	A	4	2	50	25.9	27.644	4037	6.75561	10570	0.700868	782598	38.9961	165744	2.2055	31762	1.51885	8550	0.339334	122397	49.2859	11380	0.197823
574	A	4	2	52	25.92	27.664	4164	6.82937	10308	0.669884	743872	36.3283	170620	2.22517	33232	1.5575	10446	0.406327	131199	51.7782	12045	0.205214
574	A	4	2	54	25.94	27.684	3723	5.96914	10140	0.644188	897968	42.8703	144647	1.84413	29130	1.33463	16662	0.63358	120577	46.519	11110	0.185039
574	A	4	2	56	25.96	27.704	3727	5.83939	9480	0.588534	914764	42.677	148039	1.84437	30546	1.36761	17378	0.645748	124300	46.8625	10744	0.174865
574	A	4	2	58	25.98	27.724	3540	5.80071	9648	0.626427	896502	43.7427	143786	1.87352	28338	1.32693	21942	0.852726	115648	45.5998	10409	0.177181
574	A	4	2	60	26	27.744	3374	5.39741	9176	0.581633	951226	45.3107	136130	1.73164	27598	1.26159	19967	0.757545	116379	44.7983	9701	0.161208
574	A	4	2	62	26.02	27.764	3762	6.11006	8721	0.56124	912907	44.1499	137304	1.77327	27668	1.28412	23284	0.896892	115288	45.0565	9956	0.167974
574	A	4	2	64	26.04	27.784	3075	4.93597	11113	0.706829	991976	47.4139	131794	1.68224	25522	1.17069	57556	2.19116	108025	41.7252	10439	0.174067
574	A	4	2	66	26.06	27.804	2528	3.99158	9973	0.623948	1103027	51.8598	119076	1.49505	23820	1.07476	69901	2.61762	100473	38.1736	9979	0.163676
574	A	4	2	68	26.08	27.824	3102	4.97961	9422	0.59931	1002223	47.9065	133584	1.70519	26399	1.21099	20260	0.771344	110447	42.6632	9825	0.163838
574	A	4	2	70	26.1	27.844	3095	4.52986	8838	0.512546	1265294	55.1432	114432	1.33179	23449	0.980728	9326	0.323724	105173	37.0403	9065	0.137823
574	A	4	2	72	26.12	27.864	3560	5.70048	8824	0.559863	960985	45.8199	142603	1.81574	28545	1.30615	7836	0.297585	115050	44.3297	10256	0.170596
574	A	4	2	74	26.14	27.884	2457	3.47472	8052	0.451205	1455749	61.3025	98540	1.10813	21066	0.851328	7945	0.26648	95301	32.4309	7815	0.114808
574	A	4	2	76	26.16	27.904	2711	3.72007	8441	0.458956	1468045	59.9843	102232	1.11551	21219	0.832045	9428	0.306829	101358	33.4677	8036	0.114549
574	A	4	2	78	26.18	27.924	2591	3.6632	8772	0.491414	1377196	57.9784	104488	1.17469	21874	0.883735	13598	0.455957	103549	35.2278	8495	0.124763
574	A	4	2	80	26.2	27.944	2529	3.55997	8192	0.456922	1435306	60.1615	100598	1.12603	21827	0.877994	17885	0.597092	97726	33.102	8110	0.11859
574	A	4	2	82	26.22	27.964	3381	4.85557	9276	0.527851	1192503	50.9955	122454	1.3984	25738	1.05626	30835	1.05026	115672	39.9733	9576	0.14286
574	A	4	2	84	26.24	27.984	3245	4.60112	10758	0.604416	1186261	50.0848	128216	1.44562	25586	1.0367	37214	1.25144	119637	40.8189	10659	0.156998
574	A	4	2	86	26.26	28.004	3128	4.58362	11731	0.681134	1114824	48.6435	141827	1.65259	25753	1.07838	42220	1.46729	118361	41.7347	10431	0.158781
574	A	4	2	88	26.28	28.024	3957	5.65645	13225	0.749081	947787	40.3428	167411	1.90294	31851	1.30107	39425	1.33661	141063	48.5219	12741	0.189196
574	A	4	2	90	26.3	28.044	3659	5.58084	12105	0.731572	843925	38.3281	163954	1.98849	30042	1.30938	77316	2.7968	133682	49.0633	12720	0.201537
574	A	4	2	92	26.32	28.064	3290	4.64287	10091	0.564261	1164171	48.9197	134590	1.51031	25996	1.04833	20825	0.696997	125094	42.4789	9455	0.138606
574	A	4	2	94	26.34	28.084	4264	6.5279	12443	0.754808	715958	32.6378	176981	2.1545	32576	1.42513	77680	2.82047	145132	53.4646	13511	0.214869
574	A	4	2	96	26.36	28.104	3675	5.54049	10761	0.642834	975693	43.8007	139921	1.6774	27063	1.16592	37063	1.32522	125930	45.6842	10424	0.163251
574	A	4	2	98	26.38	28.124	4053	7.20269	11446	0.805986	555912	29.4172	175339	2.47777	31597	1.60459	60707	2.55866	130268	55.7061	12297	0.227011
574	A	4	2	100	26.4	28.144	3850	6.00738	12896	0.797324	765358	35.5603	179951	2.23276	32178	1.43477	53081	1.96435	137958	51.7986	12617	0.204508
574	A	4	2	102	26.42	28.164	4038	5.3219	11726	0.612359	1161478	45.5815	153583	1.60956	29084	1.09536	52097	1.62843	138741	43.9999	11028	0.150983
574	A	4	2	104	26.44	28.184	3926	5.84603	12359	0.729204	835724	37.0553	172994	2.04836	31084	1.32266	48665	1.71863	142591	51.0916	12171	0.188264
574	A	4	2	106	26.46	28.204	4506	5.73224	12215	0.615719	1042441	39.4877	174793	1.76816	34341	1.24838	41495	1.25194	162420	49.7187	13409	0.177198
574	A	4	2	108	26.48	28.224	4215	5.62626	12607	0.66679	1027810	40.8518	172311	1.82894	31396	1.19756	27438	0.86862	151925	48.7975	11718	0.162482
574	A	4	2	110	26.5	28.244	4311	5.46227	9235	0.463647	1124979	42.444	161633	1.62851	32091	1.16193	10412	0.312885	158674	48.378	11304	0.148784
574	A	4	2	112	26.52	28.264	4239	5.74377	8951	0.480574	955603	38.5556	179123	1.92996	33821	1.30954	7056	0.22675	158224	51.5884	11748	0.165359
574	A	4	2	114	26.54	28.284	3360	5.4422	9214	0.591342	866942	41.8121	148680	1.91493	26803	1.24056	5913	0.227143	124704	48.6029	10030	0.168759
574	A	4	2	116	26.56	28.304	3461	5.41493	10179	0.631032	867588	40.4186	156720	1.94975	28476	1.27312	6217	0.230689	132565	49.9076	10725	0.174308
574	A	4	2	118	26.58	28.324	3678	5.5428	9646	0.575997	902388	40.4937	157999	1.89337	28995	1.24865	5887	0.21041	137484	49.8559	11446	0.179185
574	A	4	2	120	26.6	28.344	3811	5.81235	9440	0.57048	834400	37.8935	153053	1.85618	28481	1.24128	5951	0.215258	142337	52.2369	10987	0.174069
574	A	4	2	122	26.62	28.364	3733	5.77607	9067	0.555896	779135	35.8975	151777	1.86743	27923	1.23463	5614	0.206017	145816	54.2908	10684	0.171727
574	A	4	2	124	26.64	28.384	3723	6.17528	11511	0.75654	665833	32.8856	160025	2.11065	29594	1.40271	6807	0.267778	140789	56.1926	12124	0.2089
574	A	4	2	126	26.66	28.404	3781	6.75545	11741	0.831205	525802	27.9735	167079	2.37374	30133	1.53847	9207	0.390141	139342	59.9068	12429	0.230682
574	A	4	2	128	26.68	28.424	4245	7.23316	12867	0.868726	496582	25.1952	183328	2.48395	32723	1.59332	19311	0.780388	150246	61.6027	13704	0.242564
574	A	4	2	130	26.7	28.444	3983	7.09755	13532	0.955467	413292	21.9297	190261	2.69595	33920	1.72725	14924	0.630724	150890	64.7002	14219	0.263207
574	A	4	2	132	26.72	28.464	4508	7.17047	13100	0.82564	493249	23.3618	194300	2.45754	36012	1.63686	11816	0.445749	166856	63.8634	14432	0.238463
574	A	4	2	134	26.74	28.484	4442	7.3203	13385	0.874026	469754	23.0514	198819	2.60539	35216	1.65841	10440	0.408044	160983	63.8377	14297	0.244751
574	A	4	2	138	26.78	28.524	4944	7.33724	13764	0.809383	626672	27.6931	209593	2.4734	38404	1.62866	14617	0.51448	166100	59.3158	14785	0.227932
574	A	4	2	140	26.8	28.544	4300	6.48008	13745	0.820752	774619	34.7598	171224	2.05183	33381	1.43751	20067	0.717216	147617	53.5297	12978	0.203165
574	A	4	2	142	26.82	28.564	4369	6.60607	12941	0.775327	766336	34.5031	161656	1.94365	32031	1.38399	24425	0.875894	147638	53.7163	12460	0.195708
574	A	4	2	144	26.84	28.584	3738	5.8308	13472	0.832677	825141	38.326	160379	1.9893	30857	1.37544	31463	1.16398	133952	50.2788	12526	0.20297
574	A	4	2	146	26.86	28.604	3651	6.49521	10067	0.709638	644747	34.1544	143017	2.02317	28112	1.42913	20037	0.845414	126466	54.1379	11097	0.205077
574	A	4	3	2	26.92	28.664	3323	6.14639	9112	0.667819	639742	35.2347	131064	1.92769	26271	1.38857	22439	0.984348	120097	53.4525	10301	0.197924
574	A	4	3	4	26.94	28.684	3785	6.27425	10318	0.677714	714325	35.2589	138016	1.81924	28522	1.35106	24516	0.963831	134046	53.4683	10847	0.186782
574	A	4	3	6	26.96	28.704	4661	7.03641	11450	0.684909	728936	32.7671	160138	1.92234	32587	1.40578	28238	1.01102	151345	54.9777	12414	0.194677
574	A	4	3	8	26.98	28.724	4423	6.64447	11797	0.702216	758736	33.9399	164671	1.96709	31907	1.36971	35087	1.2501	149194	53.9314	12502	0.195098
574	A	4	3	10	27	28.744	5194	7.47707	14660	0.836217	626869	26.871	196364	2.24779	37422	1.53942	42453	1.44942	171349	59.3551	14982	0.224042
574	A	4	3	12	27.02	28.764	5510	7.93275	15627	0.891462	532523	22.829	206302	2.36178	39892	1.64119	61690	2.10641	178926	61.9858	16824	0.251612
574	A	4	3	14	27.04	28.784	4614	7.214	14647	0.907407	567287	26.4106	194665	2.42019	35495	1.58586	52985	1.96475	157532	59.2671	14168	0.230111
574	A	4	3	16	27.06	28.804	5266	7.12687	16363	0.877478	722965	29.1348	195789	2.10703	38363	1.48365	83782	2.68921	173101	56.3721	14857	0.208871
574	A	4	3	18	27.08	28.824	4478	6.79144	16553	0.99474	585250	26.4299	188529	2.27363	35440	1.53593	19937	0.717122	167241	61.0333	14211	0.223889
574	A	4	3	20	27.1	28.844	5222	6.59966	11919	0.59687	805407	30.3094	177334	1.78214	35995	1.29995	8018	0.240329	193955	58.9838	14313	0.187908
574	A	4	3	22	27.12	28.864	4439	6.67746	13097	0.780645	695119	31.136	199193	2.38267	34933	1.50163	14606	0.52109	156894	56.7909	13414	0.209611
574	A	4	3	24	27.14	28.884	4695	6.55637	15416	0.853012	734162	30.5279	189442	2.10362	36976	1.47553	56865	1.88334	167795	56.3837	14926	0.216522
574	A	4	3	26	27.16	28.904	4878	6.47458	15934	0.838012	842417	33.2946	182655	1.92782	35665	1.35273	102972	3.24149	164933	52.6774	14023	0.193348
574	A	4	3	28	27.18	28.924	4725	6.69546	12772	0.717121	790856	33.3697	182536	2.05679	33934	1.37409	15522	0.521653	161553	55.0858	12182	0.179319
574	A	4	3	30	27.2	28.944	3567	4.88998	13474	0.731906	1100336	44.9165	135399	1.47599	28148	1.10269	83529	2.71579	133411	44.009	11105	0.158144
574	A	4	3	32	27.22	28.964	3264	4.69566	10841	0.617975	1136798	48.6975	128876	1.47429	25385	1.04358	34842	1.18879	121757	42.149	8915	0.133229
574	A	4	3	34	27.24	28.984	3007	4.02668	10802	0.573157	1343874	53.5857	114158	1.21558	23340	0.893131	53318	1.69334	117593	37.8915	8691	0.120896
574	A	4	3	36	27.26	29.004	3131	4.51291	12195	0.696484	1124640	48.2685	127693	1.46354	25164	1.03646	80710	2.75903	118545	41.1153	9866	0.147722
574	A	4	3	38	27.28	29.024	3091	4.42023	11003	0.623466	1170146	49.8268	119918	1.36362	24184	0.988268	38774	1.31505	120112	41.3313	8832	0.1312
574	A	4	3	40	27.3	29.044	3745	5.35855	13499	0.765337	922560	39.3068	162183	1.84529	31528	1.28912	63336	2.14933	142616	49.1033	12265	0.182303
574	A	4	3	42	27.32	29.064	4156	6.40362	14218	0.868049	691432	31.7232	176178	2.15857	34025	1.49813	56932	2.08047	148490	55.0546	13329	0.213343
574	A	4	3	44	27.34	29.084	3940	5.6137	11906	0.672162	1006622	42.7067	150495	1.70506	28348	1.15419	12009	0.405803	138777	47.5792	11028	0.163222
574	A	4	3	46	27.36	29.104	4583	7.57339	12085	0.791303	569210	28.0085	190243	2.49985	35408	1.67202	8247	0.323216	148134	58.9036	13287	0.228085
574	A	4	3	48	27.38	29.124	3135	4.41802	8939	0.499154	1134256	47.5968	129344	1.44944	26446	1.065	6636	0.221795	131514	44.5973	10412	0.152424
574	A	4	3	50	27.4	29.144	4154	5.63105	9717	0.521928	1068189	43.1169	140498	1.51446	32083	1.24279	5127	0.164832	146114	47.6608	10454	0.147209
574	A	4	3	52	27.42	29.164	3703	5.22746	9513	0.532121	1101754	46.3126	131732	1.47874	28898	1.16575	5083	0.170182	132352	44.9588	10529	0.154402
574	A	4	3	54	27.44	29.184	3355	4.3675	11994	0.618671	1352718	52.4354	121656	1.25932	26957	1.0028	5707	0.176199	127729	40.0107	9570	0.129414
574	A	4	3	56	27.46	29.204	3138	4.19337	12194	0.645672	1356598	53.9807	119649	1.2714	25665	0.980059	6514	0.20645	120014	38.5913	9441	0.131056
574	A	4	3	58	27.48	29.224	2345	2.8556	7468	0.360341	1803242	65.386	86091	0.833635	19324	0.672437	5812	0.167855	101171	29.6454	6226	0.0787577
574	A	4	3	60	27.5	29.244	2317	2.79953	6518	0.312054	1835855	66.0503	85976	0.826039	17836	0.615825	6702	0.192052	100189	29.129	5990	0.0751824
574	A	4	3	62	27.52	29.264	2387	2.67205	8401	0.37263	2034615	67.8189	84116	0.748746	18797	0.601285	7654	0.203206	102103	27.5028	6913	0.0803874
574	A	4	3	64	27.54	29.284	2059	2.6077	8496	0.426356	1745377	65.8216	84445	0.850433	17877	0.646989	7701	0.231316	96234	29.3276	6688	0.0879889
574	A	4	3	66	27.56	29.304	2326	2.54879	7880	0.342142	2004161	65.3934	82389	0.71789	17671	0.553332	9482	0.246422	114244	30.1234	6552	0.074581
574	A	4	3	68	27.58	29.324	3577	4.36556	15159	0.733073	1426772	51.8504	129830	1.25997	26805	0.93484	19683	0.569728	136729	40.1539	10447	0.132447
574	A	4	3	70	27.6	29.344	2299	2.89819	11199	0.559401	1613027	60.549	101299	1.01545	19870	0.715792	14212	0.424912	111193	33.7297	8215	0.107579
574	A	4	3	72	27.62	29.364	3617	4.39631	12631	0.608321	1410223	51.0392	117303	1.13374	25509	0.885999	19016	0.548169	141036	41.2493	11007	0.138975
574	A	4	3	74	27.64	29.384	4452	6.03867	15937	0.856541	852557	34.4339	169309	1.82612	33429	1.29572	51416	1.65402	164522	53.6978	13992	0.19715
574	A	4	3	76	27.66	29.404	4218	5.88658	14002	0.774288	858413	35.6722	171371	1.90177	32281	1.28737	30618	1.01342	158655	53.2791	12776	0.185217
574	A	4	3	78	27.68	29.424	4876	6.73494	15212	0.832553	667457	27.4518	182309	2.00236	35144	1.38715	63507	2.0804	178423	59.3018	14568	0.209026
574	A	4	3	80	27.7	29.444	4084	5.45536	13013	0.688764	1045425	41.5822	160505	1.70487	30397	1.1603	10282	0.32574	152212	48.9253	11349	0.15748
574	A	4	3	82	27.72	29.464	4952	6.42594	14534	0.747303	921373	35.6015	173672	1.79205	34057	1.26288	11128	0.342475	171787	53.6405	13894	0.187289
574	A	4	3	84	27.74	29.484	4007	4.74725	13581	0.637544	1287242	45.4109	139115	1.31057	29321	0.992663	19598	0.550668	162089	46.2086	11524	0.141826
574	A	4	3	86	27.76	29.504	3789	5.33582	11790	0.657878	1018340	42.7018	147479	1.65147	28993	1.16673	10464	0.349486	141606	47.9849	10384	0.151905
574	A	4	3	88	27.78	29.524	4036	4.9589	12816	0.623939	1310503	47.9457	136664	1.33522	28363	0.995834	9092	0.264941	147953	43.7426	10413	0.132905
574	A	4	3	90	27.8	29.544	2865	3.72413	8100	0.417197	1298093	50.2439	112112	1.15882	21335	0.79249	6154	0.18972	138687	43.3793	6990	0.094386
574	A	4	3	92	27.82	29.564	3938	4.64061	12227	0.570919	1395728	48.9752	136843	1.28229	28762	0.968542	8175	0.228477	152392	43.2123	9933	0.121593
574	A	4	3	94	27.84	29.584	3771	4.44304	10897	0.508729	1438393	50.4636	131560	1.23257	27798	0.935918	8549	0.238888	148355	42.0603	9552	0.116909
574	A	4	3	96	27.86	29.604	3675	4.52792	11432	0.558108	1395928	51.2131	123251	1.20752	26733	0.941216	11205	0.327422	138632	41.1009	9677	0.123854
574	A	4	3	98	27.88	29.624	3776	4.52111	13170	0.624819	1413148	50.3823	134453	1.28011	27046	0.925373	12199	0.346412	145007	41.7781	11399	0.141778
574	A	4	3	100	27.9	29.644	3440	4.5626	14338	0.753525	1226322	48.4323	132691	1.39945	27066	1.02584	15576	0.489965	135340	43.1943	10311	0.142064
574	A	4	3	102	27.92	29.664	3828	4.58519	11432	0.542579	1330720	47.4623	135793	1.29338	28569	0.977869	9256	0.262945	155279	44.7553	9675	0.120383
574	A	4	3	104	27.94	29.684	4066	5.36386	13711	0.716695	1033676	40.6042	156371	1.64033	30276	1.14132	20161	0.630779	156576	49.7029	14590	0.199938
574	A	4	3	106	27.96	29.704	4345	5.26655	15561	0.747359	1143731	41.2797	160374	1.54573	32065	1.11063	38427	1.10466	167117	48.742	16147	0.20331
574	A	4	3	108	27.98	29.724	4504	5.56838	13837	0.677841	1034143	38.0704	157398	1.54737	30904	1.09181	32598	0.955821	174466	51.9024	14479	0.185951
574	A	4	3	110	28	29.744	3899	4.88294	14410	0.715068	1132301	42.2247	148646	1.48028	30587	1.09463	33889	1.00657	160715	48.4319	12601	0.163932
574	A	4	3	112	28.02	29.764	4011	5.53125	14096	0.770233	997000	40.9395	158155	1.73427	30172	1.18898	25838	0.845055	147054	48.7971	13515	0.193605
574	A	4	3	114	28.04	29.784	4041	5.42707	13989	0.744421	1067203	42.6777	145912	1.55823	29437	1.12972	25559	0.814097	146899	47.4725	12636	0.176285
574	A	4	3	116	28.06	29.804	4366	5.49639	13753	0.686036	1039691	38.974	153083	1.53245	32971	1.18611	35718	1.06644	168028	50.9005	12083	0.158015
574	A	4	3	118	28.08	29.824	3834	5.58632	12630	0.729176	882119	38.2717	150528	1.74403	30086	1.25267	20920	0.722921	146971	51.529	10848	0.164192
574	A	4	3	120	28.1	29.844	3889	5.17528	13061	0.688696	1033271	40.9437	149538	1.58238	30912	1.1755	24089	0.760274	154630	49.5149	11525	0.159319
574	A	4	3	122	28.12	29.864	4422	5.9733	12952	0.693247	942239	37.8995	151152	1.62358	31550	1.21785	20844	0.667778	159257	51.7655	11346	0.159209
574	A	4	3	124	28.14	29.884	4014	5.74814	14048	0.797112	875001	37.3108	160573	1.82846	31317	1.28153	16206	0.550403	151797	52.307	11869	0.17656
574	A	4	3	126	28.16	29.904	3608	5.266	13486	0.779925	904421	39.3063	148239	1.72045	29534	1.23179	18535	0.641597	144856	50.8742	11857	0.179771
574	A	4	3	128	28.18	29.924	3870	5.4367	12424	0.691578	958330	40.0882	148639	1.66043	30207	1.21264	21861	0.728367	147958	50.0161	11377	0.166028
574	A	4	3	130	28.2	29.944	3751	5.41733	12018	0.687743	868152	37.3346	142049	1.63133	29299	1.20918	16656	0.570512	152466	52.9856	10913	0.163724
574	A	4	3	132	28.22	29.964	3377	4.72465	11856	0.657253	1097294	45.7129	125995	1.4017	26228	1.04859	14800	0.491085	136129	45.8286	9307	0.135263
574	A	4	3	136	28.26	30.004	3091	4.52456	10871	0.630525	1134017	49.4281	118484	1.37912	24562	1.0274	16435	0.570562	120096	42.3012	9115	0.1386
574	A	4	3	138	28.28	30.024	2607	3.18746	8768	0.424775	1658463	60.379	91427	0.888877	20883	0.72962	16222	0.470396	114970	33.8248	7487	0.0950914
574	A	4	3	140	28.3	30.044	3132	4.06445	12353	0.635196	1360333	52.5656	118151	1.21922	25709	0.953378	23001	0.707916	127206	39.7222	9791	0.131989
574	A	4	3	142	28.32	30.064	3369	4.59914	11711	0.633469	1238552	50.3463	129722	1.40817	26348	1.02784	19868	0.643259	125410	41.196	10288	0.145894
574	A	4	3	144	28.34	30.084	2417	3.4933	9559	0.547429	1209463	52.051	119353	1.37169	23866	0.985689	12922	0.44294	117850	40.986	8118	0.121882
574	A	4	4	2	28.42	30.164	3158	6.21024	10534	0.820815	597953	35.0139	142141	2.2227	26155	1.46978	24160	1.12681	111812	52.9093	11088	0.226506
574	A	4	4	4	28.44	30.184	3120	5.10487	11993	0.777523	901022	43.8978	135965	1.76897	27414	1.28175	35720	1.38611	115819	45.5991	10820	0.183902
574	A	4	4	6	28.46	30.204	3241	5.35867	13061	0.855676	925274	45.5538	139242	1.83068	25867	1.22215	29784	1.16793	110179	43.8352	10240	0.175876
574	A	4	4	8	28.48	30.224	2895	3.96826	12822	0.696407	1322441	53.9765	139320	1.51855	25598	1.00267	13765	0.44749	115970	38.2511	9758	0.138945
574	A	4	4	10	28.5	30.244	2313	2.68798	9271	0.426906	1901289	65.7923	104185	0.962763	20353	0.675895	10327	0.28463	103987	29.0788	7514	0.0907092
574	A	4	4	12	28.52	30.264	2723	3.08728	8331	0.374266	1888811	63.7666	109813	0.990024	22121	0.716693	22652	0.609102	111280	30.3593	8215	0.0967532
574	A	4	4	14	28.54	30.284	1549	1.88616	8033	0.38758	2008976	72.8416	74780	0.724064	14353	0.499426	15355	0.443438	79025	23.1547	4986	0.0630681
574	A	4	4	16	28.56	30.304	3267	4.01548	12872	0.626888	1451363	53.118	137862	1.3474	27130	0.952881	29446	0.858362	131712	38.9548	9889	0.126261
574	A	4	4	18	28.58	30.324	3653	4.40562	12901	0.616505	1532961	55.0511	134463	1.28951	27258	0.939403	29494	0.84362	126561	36.7286	10032	0.125683
574	A	4	4	20	28.6	30.344	3945	4.80248	13745	0.663007	1332154	48.2892	159589	1.54485	30239	1.05193	32354	0.934118	145313	42.5666	11690	0.14783
574	A	4	4	22	28.62	30.364	3935	5.25312	15658	0.828255	1098211	43.6551	165785	1.75987	31004	1.18274	29966	0.948761	143785	46.1883	13255	0.183815
574	A	4	4	24	28.64	30.384	4511	6.45938	15983	0.906842	812702	34.6518	194773	2.21774	35460	1.45097	40408	1.37227	153022	52.7252	14502	0.215713
574	A	4	4	26	28.66	30.404	3337	5.4687	14992	0.973516	769861	37.5679	180149	2.3476	30539	1.43016	34063	1.32394	128496	50.6716	12722	0.216577
574	A	4	4	28	28.68	30.424	3864	4.16303	10376	0.442953	1733927	55.6263	137195	1.17537	26718	0.822578	26704	0.682346	142561	36.959	11476	0.128438
574	A	4	4	30	28.7	30.444	4890	6.5701	16712	0.889707	766767	30.6763	227978	2.43568	39194	1.50482	51196	1.63138	173391	56.0578	16775	0.234129
574	A	4	4	32	28.72	30.464	4551	6.15101	15486	0.829343	988350	39.7766	192927	2.07346	33920	1.31007	38383	1.23037	148950	48.4425	13295	0.186663
574	A	4	4	34	28.74	30.484	4817	7.3393	15331	0.925559	535187	24.2807	233800	2.83261	41470	1.80556	46337	1.67441	166029	60.8708	17129	0.271107
574	A	4	4	36	28.76	30.504	5326	7.70963	16155	0.926605	505672	21.7961	246765	2.8404	43111	1.78328	46032	1.58033	181111	63.0846	18559	0.279072
574	A	4	4	38	28.78	30.524	5329	7.45307	16831	0.932728	599414	24.9628	247120	2.74828	44192	1.76618	48386	1.60496	179072	60.2648	18386	0.26712
574	A	4	4	40	28.8	30.544	4984	7.17858	16812	0.959478	689733	29.5814	222943	2.5534	39929	1.64342	44316	1.51383	162453	56.3034	17814	0.266533
574	A	4	4	42	28.82	30.564	5970	7.58614	18203	0.916526	773893	29.2822	225695	2.28051	42497	1.54314	42747	1.28827	185987	56.869	17743	0.234209
574	A	4	4	44	28.84	30.584	4756	6.96558	16345	0.948541	680319	29.6692	213278	2.48385	39057	1.63461	38493	1.33707	160922	56.7124	16355	0.248826
574	A	4	4	46	28.86	30.604	3283	5.85598	12161	0.859515	705235	37.4576	157715	2.237	27106	1.38164	15907	0.672935	119584	51.3273	11227	0.208028
574	A	4	4	48	28.88	30.624	4904	6.8199	14627	0.806006	817134	33.8374	188500	2.0845	35678	1.41784	23246	0.76671	161573	54.0683	13794	0.199273
574	A	4	4	50	28.9	30.644	4939	6.82452	15638	0.856189	811423	33.3855	210847	2.31667	39039	1.54146	35066	1.14915	161530	53.7073	15278	0.219295
574	A	4	4	52	28.92	30.664	5188	6.8916	17707	0.93201	868864	34.3676	204481	2.15992	39861	1.5131	36656	1.15484	165093	52.771	15214	0.209939
574	A	4	4	54	28.94	30.684	5258	6.80439	16646	0.85356	884076	34.0671	213580	2.19782	40661	1.50365	30861	0.947184	171532	53.4146	15745	0.211661
574	A	4	4	56	28.96	30.704	4434	5.78502	15723	0.812831	1037827	40.3191	187683	1.94714	36123	1.34677	27959	0.86514	155223	48.7317	14184	0.192237
574	A	4	4	58	28.98	30.724	4585	5.37697	16457	0.764723	1310001	45.7453	178111	1.66094	36267	1.21537	40771	1.13398	155663	43.9268	14437	0.175875
574	A	4	4	60	29	30.744	3720	5.61265	16533	0.988398	945249	42.4667	174762	2.0967	31348	1.35156	47102	1.68547	125589	45.5956	12949	0.202951
574	A	4	4	62	29.02	30.764	4471	5.03758	16714	0.746197	1408158	47.2439	178058	1.5953	35711	1.14979	31873	0.851719	159383	43.2122	13951	0.163287
574	A	4	4	64	29.04	30.784	4224	4.85959	15576	0.710047	1481102	50.7385	165337	1.51255	33201	1.09151	36592	0.99843	144208	39.9219	14011	0.167446
574	A	4	4	66	29.06	30.804	3971	4.82179	14501	0.697689	1374570	49.6995	164104	1.5845	32610	1.13151	37967	1.09338	139678	40.8115	12693	0.160104
574	A	4	4	68	29.08	30.824	3679	4.57006	13429	0.660985	1398747	51.7379	145229	1.43453	28464	1.01039	29426	0.866921	132434	39.5857	10348	0.13353
574	A	4	4	70	29.1	30.844	4514	5.46999	16774	0.80541	1275093	46.0091	180195	1.73633	35013	1.21242	36151	1.03897	149331	43.5433	14653	0.184451
574	A	4	4	72	29.12	30.864	4365	5.04267	13869	0.634858	1371801	47.1894	169909	1.56083	35045	1.15692	35031	0.959808	155768	43.3013	12853	0.154245
574	A	4	4	74	29.14	30.884	4250	5.15368	14733	0.707905	1314176	47.4525	163419	1.57578	34081	1.18098	30366	0.873317	147022	42.9	12370	0.155822
574	A	4	4	76	29.16	30.904	5051	7.23529	17318	0.982951	682449	29.1089	222493	2.53431	41596	1.70267	42200	1.43366	164626	56.7445	17321	0.25774
574	A	4	4	78	29.18	30.924	5253	6.1939	13683	0.639284	1210348	42.4956	178823	1.67666	37351	1.25852	38090	1.06518	163851	46.4893	14825	0.181586
574	A	4	4	80	29.2	30.944	5426	7.47025	17840	0.973208	678645	27.8212	233094	2.55182	44321	1.74367	47319	1.54507	173950	57.6271	18721	0.267741
574	A	4	4	82	29.22	30.964	5567	7.27067	18074	0.935326	792872	30.8342	229814	2.38668	42761	1.59588	38886	1.20449	176700	55.5311	17809	0.241614
574	A	4	4	84	29.24	30.984	5851	8.24139	18949	1.05758	564317	23.6685	254513	2.85065	44948	1.80918	70662	2.36054	176149	59.7031	21120	0.309025
574	A	4	4	86	29.26	31.004	5851	7.40276	16541	0.829241	870772	32.8054	217522	2.18842	42058	1.52059	67844	2.03578	174070	52.9949	16961	0.222918
574	A	4	4	88	29.28	31.024	4612	5.53585	16173	0.769202	1219107	43.5726	179467	1.71294	36169	1.2406	46807	1.33248	158087	45.6602	14130	0.176184
574	A	4	4	90	29.3	31.044	4161	5.99876	15687	0.896106	927612	39.8205	189128	2.16812	34794	1.4334	42608	1.45684	138364	47.9992	15162	0.227065
574	A	4	4	92	29.32	31.064	4810	5.55958	14951	0.684735	1315462	45.2743	185987	1.7094	36312	1.19935	39631	1.08639	159266	44.2962	15828	0.190043
574	A	4	4	94	29.34	31.084	4813	5.24063	13723	0.592069	1548961	50.221	160854	1.39272	32941	1.02496	34751	0.89741	154462	40.4703	14230	0.160954
574	A	4	4	96	29.36	31.104	3650	4.31088	13923	0.651571	1516781	53.3425	150822	1.41645	30735	1.03731	35956	1.00716	133993	38.0805	12524	0.153655
574	A	4	4	98	29.38	31.124	4205	4.87581	14954	0.687059	1440242	49.7271	160106	1.47622	31885	1.0565	38824	1.06767	146710	40.9343	14556	0.175329
574	A	4	4	102	29.42	31.164	4880	5.72769	17290	0.8041	1131771	39.5544	200134	1.86786	38174	1.28035	93153	2.59306	169824	47.9629	17193	0.209624
574	A	4	4	104	29.44	31.184	5109	6.25291	17249	0.836499	856891	31.2283	215434	2.09664	40299	1.40942	99618	2.89161	186955	55.0592	17733	0.225454
574	A	4	4	106	29.46	31.204	4990	6.29231	16839	0.841359	970426	36.4376	202200	2.02747	37703	1.35858	54569	1.63197	168750	51.2036	15816	0.207175
574	A	4	4	108	29.48	31.224	4979	6.27501	18321	0.914907	910625	34.1734	209784	2.10237	39260	1.41391	42988	1.28492	176808	53.6193	16514	0.216199
574	A	4	4	110	29.5	31.244	5079	6.34964	15723	0.778864	858233	31.9487	216542	2.15267	39259	1.40253	20180	0.59834	187989	56.5523	16709	0.216996
574	A	4	4	112	29.52	31.264	5806	7.73775	17604	0.929618	628531	24.9426	245927	2.6062	42984	1.63699	23789	0.751916	190649	61.1391	18483	0.255882
574	A	4	4	114	29.54	31.284	6022	7.90309	18531	0.963631	618653	24.1758	239548	2.49984	44262	1.65992	68480	2.13145	191276	60.4037	19261	0.262582
574	A	4	4	116	29.56	31.304	5075	7.09818	16371	0.90728	569966	23.7376	238897	2.65696	42482	1.69792	78983	2.61999	181331	61.028	17486	0.254057
574	A	4	4	118	29.58	31.324	5023	6.68892	16427	0.866775	755547	29.9593	217702	2.30526	40543	1.5428	91293	2.88327	173220	55.5057	17931	0.248043
574	A	4	4	120	29.6	31.344	5513	6.83829	16483	0.810123	912415	33.6999	212582	2.09676	40352	1.43029	61516	1.80968	177898	53.0978	16850	0.217115
574	A	4	4	122	29.62	31.364	4972	6.63905	13460	0.712156	671411	26.6956	201987	2.14468	36184	1.38068	7467	0.23647	192861	61.9678	16118	0.223571
574	A	4	4	128	29.68	31.424	4195	5.35155	15293	0.773028	1141264	43.3521	184758	1.87419	34985	1.27535	10972	0.331962	152660	46.8618	13581	0.179974
574	A	4	4	130	29.7	31.444	4678	5.80932	13390	0.658872	1172894	43.3711	183291	1.80996	34607	1.22809	10695	0.314993	156068	46.6364	13273	0.171224
574	A	4	4	134	29.74	31.484	3073	3.27606	12700	0.536474	1916483	60.8375	120645	1.02273	24548	0.747836	55613	1.40612	124957	32.0551	10669	0.118153
574	A	4	4	136	29.76	31.504	3932	4.6822	13371	0.630893	1412229	50.0747	145478	1.37752	30648	1.04289	66140	1.86791	140225	40.1799	11636	0.143936
574	A	4	4	138	29.78	31.524	3454	4.64368	13110	0.69839	1248226	49.9701	139816	1.49472	27720	1.06496	46150	1.47152	125253	40.5205	9748	0.13614
574	A	4	4	140	29.8	31.544	3288	3.71965	8727	0.391192	1737024	58.513	109962	0.989183	23889	0.772268	14832	0.397947	129026	35.1232	7962	0.0935668
574	A	4	5	2	29.92	31.664	2338	5.04192	8744	0.747166	720487	46.2652	111574	1.91328	21224	1.30791	31060	1.58858	82792	42.9622	7754	0.173703
574	A	4	5	4	29.94	31.684	2635	5.23242	8874	0.698228	775162	45.8344	123787	1.95462	22741	1.29042	19700	0.927778	91806	43.8672	9449	0.194912
574	A	4	5	6	29.96	31.704	2746	5.19264	10416	0.780449	778206	43.8187	133461	2.00681	25664	1.3868	32391	1.45267	99262	45.1666	9942	0.195295
574	A	4	5	8	29.98	31.724	3087	5.26348	10746	0.726004	883695	44.8658	132787	1.80035	27001	1.31558	24894	1.00667	109326	44.8546	9457	0.167502
574	A	4	5	10	30	31.744	2977	4.7899	10765	0.686304	948603	45.4474	139574	1.78573	27247	1.25276	21609	0.824589	116317	45.0336	10753	0.179724
574	A	4	5	12	30.02	31.764	3268	4.8923	12591	0.746872	1078034	48.0552	137401	1.63563	27314	1.16847	30133	1.06986	117330	42.2655	10685	0.166163
574	A	4	5	14	30.04	31.784	2977	4.57686	12502	0.761594	1102840	50.4868	132480	1.61958	25171	1.10583	25117	0.915824	109140	40.3756	9884	0.157852
574	A	4	5	16	30.06	31.804	3758	5.23706	12786	0.706026	1102956	45.7684	159827	1.77111	29784	1.18608	31138	1.02915	131638	44.1427	11018	0.159501
574	A	4	5	18	30.08	31.824	3386	4.64753	12528	0.681354	1186685	48.5007	143860	1.57014	28158	1.10443	41586	1.35375	127124	41.9865	10915	0.155628
574	A	4	5	20	30.1	31.844	2743	3.64029	11795	0.620246	1417682	56.023	128241	1.35332	24311	0.921963	38793	1.22101	113017	36.0911	9362	0.129065
574	A	4	5	22	30.12	31.864	2363	2.71761	9579	0.436515	1951973	66.8458	94620	0.865307	20218	0.664449	31018	0.846044	99502	27.5361	7387	0.0882513
574	A	4	5	24	30.14	31.884	2306	2.83766	10045	0.489787	1821889	66.7575	92633	0.906424	18914	0.665097	31061	0.90651	92348	27.3449	7207	0.0921268
574	A	4	5	26	30.16	31.904	1951	2.51929	10287	0.526338	1732820	66.6271	92461	0.949387	18115	0.668436	27088	0.829571	89458	27.7963	6229	0.0835543
574	A	4	5	28	30.18	31.924	1894	2.29904	9177	0.441389	1883811	68.0895	91379	0.882015	18234	0.632482	35131	1.01137	90936	26.5612	6584	0.0830205
574	A	4	5	30	30.2	31.944	2146	2.77602	10083	0.516819	1741880	67.0948	88114	0.906363	17152	0.634028	30385	0.932198	86907	27.0517	6556	0.0880972
574	A	4	5	32	30.22	31.964	2465	2.98853	11433	0.549232	1720132	62.0982	107700	1.03829	22347	0.774212	35876	1.03157	107724	31.4267	7401	0.0932096
574	A	4	5	34	30.24	31.984	2160	2.99664	12955	0.712153	1470206	60.7345	110747	1.22173	20830	0.825791	43996	1.4476	95660	31.9343	8828	0.127225
574	A	4	5	36	30.26	32.004	3054	3.86042	13254	0.663846	1501066	56.4991	121498	1.22123	25252	0.91214	48270	1.4471	115942	35.2657	9933	0.130429
574	A	4	5	38	30.28	32.024	2678	3.06899	14225	0.645942	1737527	59.2917	120576	1.09878	24417	0.79961	36598	0.994715	123268	33.9925	9055	0.107796
574	A	4	5	40	30.3	32.044	3517	4.4501	14296	0.71675	1405080	52.939	142519	1.43395	27562	0.996572	36685	1.10088	125499	38.2106	11574	0.152129
574	A	4	5	42	30.32	32.064	2412	2.89154	12617	0.599327	1746260	62.3359	113455	1.08153	21554	0.738382	28294	0.804456	109008	31.4454	8304	0.103412
574	A	4	5	44	30.34	32.084	1924	2.19112	10584	0.477602	2055153	69.6918	88345	0.80003	18283	0.594988	29577	0.798859	92568	25.3669	6651	0.0786823
574	A	4	5	46	30.36	32.104	2006	2.42033	11959	0.571735	1872301	67.2662	98268	0.942802	18236	0.628744	19050	0.545123	94862	27.5412	6692	0.0838745
574	A	4	5	48	30.38	32.124	1807	1.92162	9147	0.385428	2281051	72.2305	85233	0.720743	16566	0.503416	27501	0.693606	91751	23.4783	6010	0.0663916
574	A	4	5	50	30.4	32.144	1804	1.86322	7200	0.294655	2393037	73.5958	76448	0.627851	15412	0.454869	33210	0.813488	89704	22.2938	5247	0.0562947
574	A	4	5	52	30.42	32.164	2134	2.35731	9672	0.423344	2018906	66.4071	103484	0.90899	20756	0.655188	39890	1.04506	105779	28.1169	7499	0.0860508
574	A	4	5	54	30.44	32.184	1569	1.73221	8044	0.351888	2210785	72.6777	76463	0.671263	15467	0.48796	42541	1.11389	86205	22.9011	5581	0.0640058
574	A	4	5	56	30.46	32.204	1951	2.17152	8331	0.367416	2116385	70.1419	87520	0.774599	18224	0.579629	50054	1.3213	91743	24.5711	6275	0.072552
574	A	4	5	58	30.48	32.224	2093	2.34913	9428	0.419288	2058369	68.7919	93323	0.832894	17921	0.574778	61136	1.62738	93771	25.3252	6815	0.0794571
574	A	4	5	60	30.5	32.244	2287	2.59932	9514	0.428461	1886997	63.8618	101873	0.920695	19717	0.640375	63724	1.71772	108753	29.7427	7533	0.0889387
574	A	4	5	62	30.52	32.264	2461	2.90871	11705	0.548171	1710533	60.2002	114653	1.07755	23643	0.798532	51615	1.44684	115753	32.9206	8092	0.0993517
574	A	4	5	64	30.54	32.284	2578	3.1796	11080	0.541483	1619649	59.4822	117514	1.15251	23785	0.838288	51949	1.51958	111769	33.1709	9007	0.115398
574	A	4	5	66	30.56	32.304	3728	4.36453	14611	0.677792	1413396	49.2722	149537	1.39211	29878	0.99957	87462	2.42849	144548	40.7211	11857	0.1442
574	A	4	5	68	30.58	32.324	2998	3.39648	11755	0.527686	1691091	57.0481	123535	1.11289	25325	0.819874	72129	1.93804	128563	35.0477	9279	0.109201
574	A	4	5	70	30.6	32.344	2672	3.65364	15060	0.815961	1294403	52.703	129987	1.41336	23950	0.935826	92591	3.00271	113464	37.3331	10027	0.142426
574	A	4	5	72	30.62	32.364	2482	3.29241	13662	0.718096	1419464	56.0679	129420	1.36514	23684	0.897776	51718	1.62708	112508	35.9123	8663	0.119374
574	A	4	5	74	30.64	32.384	3057	3.80744	14260	0.703741	1479914	54.8847	128665	1.27427	25261	0.89906	47139	1.39243	123172	36.9144	9580	0.123946
574	A	4	5	76	30.66	32.404	1781	2.13619	12046	0.572498	1880039	67.1459	90381	0.862019	17153	0.587917	77311	2.19924	91502	26.4091	6995	0.0871552
574	A	4	5	78	30.68	32.424	1875	2.12808	9998	0.449631	2088346	70.5776	81243	0.733225	16315	0.529145	56135	1.51104	87864	23.9963	6357	0.0749496
574	A	4	5	80	30.7	32.444	2370	2.78405	11736	0.546267	1673736	58.5454	114535	1.06987	21533	0.722827	25930	0.722416	125624	35.5098	8138	0.0993063
574	A	4	5	82	30.72	32.464	3222	4.37752	13281	0.714972	1229026	49.7211	131432	1.41993	24323	0.944322	16896	0.54443	128928	42.1499	9059	0.127853
574	A	4	5	84	30.74	32.484	3275	3.8959	10148	0.478336	1532043	54.2681	120221	1.13721	23857	0.810986	27403	0.773127	134558	38.5171	9651	0.119261
574	A	4	5	86	30.76	32.504	1941	2.17493	9070	0.402701	2008158	67.003	93817	0.835921	17676	0.565984	19973	0.530785	105337	28.4019	7280	0.0847385
574	A	4	5	88	30.78	32.524	1864	1.89948	6663	0.269038	2433652	73.8454	71056	0.575775	13974	0.40692	18237	0.440755	91745	22.4966	6241	0.0660651
574	A	4	5	90	30.8	32.544	1740	1.90991	6430	0.27966	2256129	73.7402	75411	0.658207	13582	0.426018	16913	0.440291	85098	22.4765	6066	0.0691665
574	A	4	5	92	30.82	32.564	2203	2.28986	6401	0.263632	2250804	69.6641	86778	0.717246	17404	0.516944	10162	0.250512	104851	26.2249	6749	0.0728725
574	A	4	5	94	30.84	32.584	1698	1.84967	7824	0.337707	2222763	72.0984	82918	0.718238	15432	0.480372	11938	0.30842	92065	24.1322	6630	0.0750238
574	A	4	5	96	30.86	32.604	2013	2.36014	8547	0.397066	1980287	69.1351	86828	0.809501	17316	0.580152	17282	0.480555	92741	26.1645	5996	0.0730272
574	A	4	5	98	30.88	32.624	1835	2.032	9873	0.433204	2107280	69.4844	89243	0.785825	17750	0.561677	18550	0.487178	98070	26.1319	7292	0.0838811
574	A	4	5	100	30.9	32.644	1428	1.582	6792	0.298147	2214673	73.0574	70922	0.624773	13576	0.429784	18509	0.486313	87947	23.4447	6679	0.0768633
574	A	4	5	102	30.92	32.664	2252	2.64311	9978	0.464029	1939143	67.7693	90172	0.841554	17361	0.582266	30744	0.85578	94741	26.7566	7166	0.0873681
574	A	4	5	104	30.94	32.684	1865	2.14108	9613	0.437288	1989970	68.0263	83092	0.758537	15531	0.509511	22925	0.624192	99233	27.413	7558	0.0901343
574	A	4	5	106	30.96	32.704	2838	3.10199	14804	0.641154	1788247	58.2012	120211	1.04481	24255	0.757582	37346	0.968116	133721	35.1701	10129	0.115007
574	A	4	5	108	30.98	32.724	2105	2.52291	12098	0.574538	1757085	62.7075	102772	0.979464	19740	0.676079	24110	0.685335	110127	31.7607	7506	0.0934519
574	A	4	5	110	31	32.744	2485	2.96962	13294	0.629486	1680635	59.8033	112381	1.0679	22001	0.751307	26133	0.740661	118014	33.9356	8231	0.102178
574	A	4	5	112	31.02	32.764	3485	4.15075	13200	0.62295	1458176	51.7143	135817	1.2863	27357	0.931093	32905	0.929483	140389	40.235	10516	0.130108
574	A	4	5	114	31.04	32.784	2633	2.73281	10579	0.43507	2100603	64.9202	100197	0.826946	19750	0.585769	22781	0.560773	119479	29.8399	9146	0.0986097
574	A	4	5	116	31.06	32.804	3333	3.96146	14229	0.670115	1426482	50.4851	140024	1.32338	26751	0.908574	39135	1.10317	144752	41.3991	12080	0.149148
574	A	4	5	118	31.08	32.824	3331	4.48617	15023	0.801702	1153229	46.248	156006	1.67073	27857	1.0721	38577	1.23221	136712	44.3051	13146	0.183918
574	A	4	5	120	31.1	32.844	3592	4.19252	14522	0.671615	1444957	50.2193	147104	1.3653	28416	0.947768	26681	0.738578	148546	41.7202	11936	0.14472
574	A	4	5	122	31.12	32.864	3104	3.74416	14252	0.681184	1611553	57.8835	119095	1.14233	22967	0.791658	23797	0.680787	120433	34.9563	9587	0.120128
574	A	4	5	124	31.14	32.884	2766	2.95486	15674	0.663467	1957826	62.2781	124712	1.05939	22993	0.701908	28637	0.72555	122522	31.4952	10950	0.121514
574	A	4	5	126	31.16	32.904	2464	2.93078	12324	0.580831	1683048	59.6096	117867	1.1148	22902	0.778424	26760	0.754891	119205	34.118	9119	0.112673
574	A	4	5	128	31.18	32.924	1955	2.0789	9834	0.414354	2213274	70.0806	79714	0.674038	17189	0.52232	27627	0.696747	99517	25.4642	6232	0.0688404
574	A	4	5	130	31.2	32.944	2175	2.47638	8369	0.377561	2037912	69.0909	77740	0.703829	15641	0.508889	21794	0.588506	95580	26.1862	5729	0.067759
574	A	4	5	132	31.22	32.964	1634	1.8163	8171	0.359887	2179600	72.1422	67193	0.593914	13615	0.432468	18868	0.497413	90086	24.0957	5380	0.0621223
574	A	4	6	2	31.42	33.164	1617	1.9147	8739	0.410023	2077777	73.26	60655	0.571113	13709	0.463871	11235	0.315515	80719	22.9992	5327	0.0655245
574	A	4	6	4	31.44	33.184	1372	1.53998	8088	0.359715	2179963	72.8598	56579	0.504988	12609	0.40443	12810	0.34101	88624	23.9365	4601	0.0536468
574	A	4	6	6	31.46	33.204	853	0.98517	7760	0.355123	2275420	78.2529	55965	0.513976	11811	0.389807	29736	0.814518	67034	18.6296	4904	0.0588359
574	A	4	6	8	31.48	33.224	1284	1.46257	8278	0.373623	2275214	77.1706	62747	0.568342	12746	0.414884	11388	0.307649	71661	19.6418	5115	0.060524
574	A	4	6	10	31.5	33.244	1215	1.27517	6859	0.285238	2545649	79.5548	54671	0.45626	11473	0.344087	14913	0.371203	69942	17.6635	4563	0.0497475
574	A	4	6	12	31.52	33.264	1157	1.35631	6027	0.279952	2275162	79.4175	49907	0.465214	9507	0.318472	19336	0.537588	62308	17.5759	4030	0.0490752
574	A	4	6	14	31.54	33.284	2236	2.76416	11497	0.563159	1664783	61.2809	101975	1.00242	20588	0.727286	14475	0.42439	111418	33.1431	7365	0.0945787
574	A	4	6	16	31.56	33.304	2245	2.7065	10696	0.510939	1717688	61.6614	102736	0.98487	19699	0.678636	14612	0.417789	113586	32.9506	7128	0.0892667
574	A	4	6	18	31.58	33.324	2720	2.77175	12724	0.513764	2091586	63.4654	100292	0.812671	20936	0.609648	14607	0.353022	127985	31.3827	8597	0.0910042
574	A	4	6	20	31.6	33.344	2930	3.22233	14318	0.623936	1888782	61.853	107299	0.938343	22206	0.697867	16643	0.4341	121412	32.13	8792	0.100443
574	A	4	6	22	31.62	33.364	2278	2.63384	12353	0.565931	1839852	63.3425	94558	0.869356	20219	0.668029	10285	0.28203	113394	31.548	7518	0.0902958
574	A	4	6	24	31.64	33.384	3064	3.72212	15179	0.730635	1538243	55.6421	118699	1.1466	25421	0.882459	9620	0.277161	128205	37.476	9741	0.122924
574	A	4	6	26	31.66	33.404	3265	3.79788	11409	0.525849	1687255	58.4407	109219	1.01023	23156	0.7697	9385	0.258909	125381	35.0943	8483	0.102503
574	A	4	6	28	31.68	33.424	2961	3.80377	13258	0.674853	1535399	58.7319	104161	1.06401	22481	0.825262	9060	0.276032	111664	34.5172	8013	0.10693
574	A	4	6	30	31.7	33.444	2199	2.56859	12757	0.590437	1923958	66.9178	81117	0.753434	17674	0.589936	10745	0.297668	100342	28.2032	6500	0.0788701
574	A	4	6	32	31.72	33.464	1708	2.00609	11369	0.529103	1996349	69.8193	75311	0.703372	16007	0.537245	12753	0.355247	91886	25.9692	6591	0.0804162
574	A	4	6	34	31.74	33.484	1217	1.35169	10302	0.453381	2336323	77.2673	54973	0.485511	12062	0.38283	14134	0.372312	73455	19.6315	4808	0.0554728
574	A	4	6	36	31.76	33.504	1580	1.61474	11267	0.456256	2494189	75.9017	64691	0.525718	14130	0.412656	15117	0.366409	84028	20.6641	5509	0.0584854
574	A	4	6	38	31.78	33.524	917	0.946587	6811	0.278585	2530154	77.7705	51635	0.423837	10010	0.295274	14338	0.351023	80072	19.8892	4192	0.0449513
574	A	4	6	40	31.8	33.544	1359	1.27164	5160	0.191315	2812626	78.3669	58807	0.437559	11314	0.302524	13370	0.296709	84819	19.0978	3661	0.0355855
574	A	4	6	42	31.82	33.564	1637	1.64867	7619	0.304045	2424283	72.7017	48459	0.388081	11258	0.324001	11526	0.275308	100339	24.3165	3986	0.0417015
574	A	4	6	44	31.84	33.584	1061	1.09081	6394	0.260473	2575685	78.8506	56029	0.458049	10980	0.32258	10537	0.256926	75631	18.7103	4707	0.05027
574	A	4	6	46	31.86	33.604	1470	1.32103	7865	0.280059	2944657	78.7964	62561	0.447057	11412	0.29306	26323	0.56103	84382	18.247	5819	0.0543217
574	A	4	6	48	31.88	33.624	1231	1.17006	6762	0.254673	2787503	78.894	57741	0.436415	11344	0.308119	18609	0.419498	80745	18.4677	5015	0.0495168
574	A	4	6	50	31.9	33.644	1685	1.6457	8061	0.311957	2582186	75.0956	68475	0.531797	13591	0.379317	17530	0.406058	91765	21.5662	6244	0.0633494
574	A	4	6	52	31.92	33.664	1531	1.59429	7542	0.311196	2406245	74.612	71800	0.594539	14422	0.429159	17291	0.427039	87675	21.9692	5781	0.0625352
574	A	4	6	54	31.94	33.684	1375	1.35571	8625	0.33696	2516370	73.8781	70535	0.55301	14513	0.408904	18595	0.434827	96821	22.971	6002	0.0614738
574	A	4	6	56	31.96	33.704	2556	2.45243	10055	0.382272	2469340	70.5493	83789	0.639273	18265	0.50079	17626	0.401093	108323	25.0094	6568	0.0654633
574	A	4	6	58	31.98	33.724	2499	2.60072	13160	0.542674	2197276	68.0909	93374	0.772712	19310	0.574263	22021	0.543526	107019	26.8	6949	0.0751242
574	A	4	6	60	32	33.744	2851	3.06173	13687	0.582415	2033983	65.0419	108480	0.926367	22840	0.700916	23562	0.600119	112144	28.9796	9588	0.106961
574	A	4	6	62	32.02	33.764	3335	3.4604	14847	0.610414	1969485	60.8499	121170	0.999745	25444	0.754425	25423	0.625623	130573	32.6009	9148	0.0986021
574	A	4	6	64	32.04	33.784	3048	3.21478	13509	0.564567	1978394	62.1336	113290	0.95015	25200	0.759517	24347	0.609029	124769	31.6658	9365	0.102606
574	A	4	6	66	32.06	33.804	2866	3.04697	11691	0.492492	2003220	63.4158	113073	0.955905	22764	0.691577	19799	0.499218	120427	30.8079	8164	0.0901622
574	A	4	6	68	32.08	33.824	2519	2.9558	11128	0.517392	1853242	64.7524	109410	1.02086	22639	0.75911	17565	0.488822	104196	29.4201	7012	0.085471
574	A	4	6	70	32.1	33.844	2869	3.00677	11440	0.475063	2087549	65.1454	110753	0.922974	23691	0.709502	19390	0.481952	115656	29.1665	8437	0.0918518
574	A	4	6	74	32.14	33.884	2907	3.17437	11761	0.508876	1966855	63.9531	109262	0.948737	23773	0.741817	19644	0.508743	114440	30.0702	8294	0.094082
574	A	4	6	76	32.16	33.904	3879	5.2159	15661	0.83442	1139055	45.607	154044	1.6471	30345	1.166	23684	0.755302	137822	44.5939	12917	0.180427
574	A	4	6	78	32.18	33.924	4839	7.52847	21758	1.3413	523079	24.2323	218401	2.7019	39722	1.76597	31247	1.15296	162930	60.9956	17415	0.281452
574	A	4	6	80	32.2	33.944	5940	7.72331	24215	1.24755	607371	23.5152	237348	2.45396	45536	1.69189	38606	1.1905	197837	61.8973	20758	0.280371
574	A	4	6	82	32.22	33.964	5139	7.3666	21720	1.23368	619290	26.4338	206031	2.34847	39731	1.62749	47111	1.60165	171447	59.1378	16822	0.250493
574	A	4	6	84	32.24	33.984	4369	6.34253	23727	1.36483	677270	29.2765	202268	2.33492	36890	1.53035	44377	1.5279	164247	57.3752	16430	0.247769
574	A	4	6	86	32.26	34.004	5225	6.34543	23500	1.13083	925725	33.476	211280	2.04031	41208	1.43007	44457	1.28047	185042	54.0744	17634	0.222462
574	A	4	6	88	32.28	34.024	5770	7.58831	22962	1.19656	642250	25.1507	219555	2.29602	42610	1.60133	38496	1.20072	191911	60.7317	17176	0.23465
574	A	4	6	90	32.3	34.044	4775	7.00666	20196	1.17424	619847	27.0831	210766	2.45925	38895	1.63092	33495	1.16566	167732	59.2244	16779	0.255761
574	A	4	6	92	32.32	34.064	5639	6.65954	19071	0.892423	938008	32.9857	199690	1.87526	39932	1.34761	29300	0.820664	194314	55.2195	16246	0.199305
574	A	4	6	94	32.34	34.084	4255	5.19442	17937	0.867646	1196958	43.5104	161686	1.56954	32619	1.13791	31437	0.910194	158799	46.6479	12777	0.16203
574	A	4	6	96	32.36	34.104	3536	4.37483	17547	0.860215	1276857	47.04	150546	1.48109	30633	1.08303	40769	1.19628	147181	43.8174	11444	0.147081
574	A	4	6	98	32.38	34.124	4557	5.50318	19710	0.943142	1114413	40.0736	179244	1.72125	36402	1.2562	41184	1.17956	169133	49.1484	13923	0.174662
574	A	4	6	100	32.4	34.144	5764	6.4201	20184	0.8908	1153010	38.2409	187512	1.66077	38837	1.23613	41206	1.08851	187652	50.2941	14579	0.168684
574	A	4	6	102	32.42	34.164	3948	5.14403	18034	0.931051	1077490	41.8038	157939	1.63636	32577	1.21294	36792	1.13693	153001	47.9697	12201	0.16514
574	A	4	6	104	32.44	34.184	3982	4.82513	17960	0.862321	1225385	44.2137	153894	1.48284	32471	1.12436	37730	1.0843	158664	46.2629	11480	0.144504
574	A	4	6	108	32.48	34.224	4522	5.57788	18194	0.889246	1104078	40.5523	169214	1.65973	35699	1.25833	42929	1.25587	163887	48.644	12695	0.162668
574	A	4	6	110	32.5	34.244	4869	6.21114	18232	0.921554	925041	35.1374	178661	1.81228	37545	1.36862	38502	1.16485	173334	53.2061	13439	0.178085
574	A	4	6	112	32.52	34.264	4101	5.79431	15636	0.875372	874986	36.812	154001	1.73021	32541	1.31384	42749	1.4325	152588	51.8775	11194	0.164296
574	A	4	6	114	32.54	34.284	3630	5.65564	14400	0.888983	839780	38.9599	143538	1.77831	28882	1.28589	68438	2.52888	129983	48.7314	10568	0.17104
574	A	4	6	116	32.56	34.304	5155	6.04771	18851	0.876298	1059091	36.9975	186204	1.73706	39234	1.3153	83388	2.32018	178996	50.5303	14411	0.175625
574	A	4	6	118	32.58	34.324	4282	5.31074	16632	0.817351	1124782	41.5388	156333	1.54178	34363	1.21787	44608	1.31213	161190	48.1053	12107	0.155982
574	A	4	6	120	32.6	34.344	3952	5.4012	16364	0.886172	1013405	41.2413	152386	1.65608	31084	1.21398	41843	1.35629	146185	48.0753	11946	0.1696
574	A	4	6	122	32.62	34.364	4526	5.93207	16865	0.875857	974377	38.0273	159176	1.65895	33947	1.27143	49241	1.53064	160236	50.5357	12344	0.168065
574	A	4	6	124	32.64	34.384	4189	5.66943	19910	1.06772	942567	37.9855	175598	1.88979	35335	1.36658	47831	1.5353	154424	50.291	13844	0.194635
574	A	4	6	126	32.66	34.404	5168	6.10855	20132	0.942884	1042050	36.6759	179243	1.6847	39181	1.3234	48087	1.34803	181930	51.7448	13981	0.171666
574	A	4	6	128	32.68	34.424	5358	6.30399	19436	0.906098	1055217	36.9685	171086	1.60063	36704	1.23403	55494	1.54851	181121	51.2776	13143	0.160634
574	A	4	6	130	32.7	34.444	5525	6.23473	17269	0.772161	1059366	35.5966	163394	1.46617	36937	1.1911	62440	1.6711	194865	52.9134	13204	0.154782
574	A	4	6	132	32.72	34.464	4149	5.72622	16075	0.879086	902081	37.0721	155284	1.70418	34079	1.34404	46877	1.53441	155274	51.5668	12079	0.173175
574	A	4	6	134	32.74	34.484	5486	5.71303	20377	0.840826	1156339	35.8569	185315	1.53456	40422	1.2029	59276	1.46401	212391	53.2223	15301	0.165524
574	A	4	6	136	32.76	34.504	3164	4.03493	21405	1.08161	1210750	45.976	157020	1.59228	29798	1.08589	44208	1.33708	145607	44.6816	15903	0.210673
574	A	4	7	2	32.92	34.664	1556	4.76884	5381	0.653464	439725	40.1293	72022	1.75522	13546	1.18636	22326	1.62282	67413	49.7157	5287	0.168323
574	A	4	7	4	32.94	34.684	6390	6.57918	15316	0.624844	1105681	33.8983	164193	1.34428	41607	1.22416	46341	1.1316	222208	55.0525	13575	0.145191
574	A	4	7	6	32.96	34.704	6349	6.76316	16520	0.697284	1041817	33.0455	164727	1.39532	41732	1.27032	48715	1.23073	216296	55.4421	14059	0.155571
574	A	4	7	10	33	34.744	6971	7.11287	16949	0.68525	1015558	30.8554	176357	1.43089	44243	1.29001	61963	1.49947	232026	56.9682	14894	0.157867
574	A	5	1	104	34.14	35.884	2017	5.85758	10588	1.21838	391556	33.8597	114669	2.64803	18448	1.53095	39558	2.7246	74218	51.8642	9830	0.296548
574	A	5	1	106	34.16	35.904	3056	5.64065	10433	0.763028	725353	39.866	134068	1.96773	24707	1.30316	52785	2.31069	107960	47.9497	10384	0.1991
574	A	5	1	110	34.2	35.944	3855	5.21322	14620	0.783402	1109810	44.6897	160159	1.72225	29863	1.15403	85399	2.73899	133745	43.5217	12581	0.176737
574	A	5	1	118	34.28	36.024	2939	4.95958	14527	0.971352	866953	43.563	152537	2.04684	25433	1.22643	53703	2.14931	110500	44.8698	12189	0.21367
574	A	5	1	120	34.3	36.044	3130	4.60705	14586	0.850688	1123077	49.2227	147052	1.72113	25268	1.0628	54716	1.91007	114202	40.4482	11601	0.17738
574	A	5	1	122	34.32	36.064	3695	5.44475	15294	0.892977	1001092	43.9253	161268	1.88963	28239	1.18909	38709	1.35279	127232	45.1135	12540	0.191951
574	A	5	1	124	34.34	36.084	3699	5.68832	16587	1.0107	896865	41.068	168888	2.0652	28732	1.2626	71984	2.62537	124436	46.046	14632	0.23374
574	A	5	1	126	34.36	36.104	3406	5.61168	18341	1.19737	737450	36.1791	178771	2.34212	29975	1.41126	90227	3.52566	124769	49.4654	15621	0.267354
574	A	5	1	128	34.38	36.124	3275	4.70879	13103	0.74649	1157379	49.5508	137716	1.57451	24379	1.00165	69192	2.35944	115283	39.885	11606	0.173345
574	A	5	1	130	34.4	36.144	3369	5.13012	15221	0.918386	961747	43.6078	161811	1.95929	26946	1.17252	105312	3.8033	117873	43.1904	13791	0.218148
574	A	5	1	132	34.42	36.164	4555	8.01274	17961	1.25193	415653	21.7721	209542	2.93108	36428	1.83117	46936	1.95819	146260	61.9106	18180	0.332213
574	A	5	1	134	34.44	36.184	4310	7.60544	17913	1.25248	402546	21.1514	210137	2.94859	35314	1.78072	71393	2.98785	145888	61.946	17865	0.327476
574	A	5	1	136	34.46	36.204	4323	7.71842	18737	1.32556	375123	19.9432	215759	3.06321	36740	1.87449	110021	4.6588	142179	61.0837	17937	0.332677
574	A	5	1	138	34.48	36.224	3582	5.29501	15629	0.915436	937138	41.2498	160332	1.88463	27634	1.16731	34260	1.20111	135136	48.0683	14220	0.218359
574	A	5	1	140	34.5	36.244	4141	6.63074	16236	1.03013	666869	31.7961	198004	2.52113	33944	1.55317	84604	3.21295	137553	52.9997	15394	0.256058
574	A	5	1	142	34.52	36.264	3997	7.50875	15337	1.14164	360130	20.1451	206163	3.0797	34113	1.83128	56848	2.53282	140342	63.4407	16398	0.320003
574	A	5	1	144	34.54	36.284	3299	5.17078	12015	0.746196	962704	44.9307	161295	2.01029	28065	1.25701	24184	0.898995	118794	44.8038	11194	0.182259
574	A	5	1	146	34.56	36.304	4182	7.72906	12504	0.915687	482844	26.5721	203725	2.99399	33567	1.77278	15060	0.66012	132815	59.0658	15127	0.290419
574	A	5	1	148	34.58	36.324	2691	4.38888	11509	0.743761	1009814	49.0409	137264	1.78017	25331	1.18057	23973	0.927296	106405	41.7589	10595	0.179503
574	A	5	2	2	34.62	36.364	3189	6.13933	12920	0.985563	651310	37.3363	140044	2.14385	26376	1.45103	12638	0.577033	110407	51.1458	11058	0.221143
574	A	5	2	4	34.64	36.384	3480	5.33593	16300	0.990316	933874	42.6379	154478	1.88348	29653	1.29927	12869	0.467984	127918	47.1964	11847	0.188699
574	A	5	2	6	34.66	36.404	5215	6.75131	16505	0.846651	925868	35.6911	202445	2.08403	39625	1.4659	20891	0.641429	167942	52.3166	15095	0.203
574	A	5	2	8	34.68	36.424	4137	5.08184	15782	0.768162	1245641	45.5623	157426	1.53772	33495	1.17575	44375	1.29279	150271	44.4178	12826	0.163665
574	A	5	2	10	34.7	36.444	4628	6.22574	17318	0.923105	907285	36.3428	189473	2.02679	37337	1.43528	41827	1.33447	159106	51.5028	14956	0.208998
574	A	5	2	14	34.74	36.484	4907	6.23259	22590	1.1369	936984	35.4374	195727	1.97682	37737	1.36968	94827	2.85654	166168	50.7863	15449	0.203837
574	A	5	2	16	34.76	36.504	4965	6.78515	21439	1.16091	782537	31.8436	196321	2.13339	37706	1.47249	106142	3.4402	160989	52.9399	15802	0.224327
574	A	5	2	18	34.78	36.524	3356	4.85107	17724	1.01516	963053	41.4518	148118	1.7025	28710	1.1859	79988	2.74218	134745	46.8679	12224	0.183552
574	A	5	2	20	34.8	36.544	5172	7.13931	17046	0.932343	689038	28.3216	193823	2.12749	36234	1.42927	21504	0.704	178025	59.1324	14894	0.213569
574	A	5	2	22	34.82	36.564	5388	7.43238	19005	1.03878	740283	30.4071	212295	2.32865	38751	1.52751	21753	0.711664	169684	56.3233	16098	0.230676
574	A	5	2	24	34.84	36.584	4858	6.4029	18005	0.940302	940241	36.9007	189823	1.98944	36969	1.39238	23176	0.724458	162239	51.4542	14285	0.195582
574	A	5	2	26	34.86	36.604	4484	6.24059	18568	1.02395	953661	39.5213	183423	2.02991	35099	1.3959	32372	1.06853	144883	48.5203	13801	0.199526
574	A	5	2	28	34.88	36.624	4887	6.36019	18271	0.942204	1036014	40.1486	176616	1.82777	34882	1.29727	20515	0.63322	155205	48.6049	13753	0.185932
574	A	5	2	30	34.9	36.644	5777	6.86571	16884	0.795085	964467	34.1308	211366	1.99748	40594	1.37862	14560	0.410393	189612	54.2245	15990	0.197406
574	A	5	2	32	34.92	36.664	4519	5.68444	17353	0.864918	1152757	43.1777	172710	1.72753	32988	1.18577	23188	0.691774	153608	46.4949	13235	0.172941
574	A	5	2	34	34.94	36.684	5444	6.58258	17842	0.854825	1047239	37.7052	198554	1.90906	37737	1.3039	34438	0.987578	173434	50.4614	15568	0.195542
574	A	5	2	36	34.96	36.704	5336	6.3653	19055	0.900674	1050327	37.3082	194500	1.84496	38306	1.30578	30780	0.870818	178413	51.2126	15467	0.191663
574	A	5	2	38	34.98	36.724	4546	5.62877	17061	0.837036	1159686	42.7564	171211	1.6857	33108	1.17143	53655	1.57561	154988	46.1773	13038	0.167697
574	A	5	2	42	35.02	36.764	3805	5.22241	15695	0.853557	1064229	43.4939	168684	1.841	31688	1.24283	43199	1.40619	138553	45.7592	12691	0.180943
574	A	5	2	44	35.04	36.784	5071	7.42099	20378	1.18164	646506	28.172	226613	2.63704	39533	1.65321	68796	2.38774	159844	56.2874	17103	0.259998
574	A	5	2	46	35.06	36.804	4858	7.02389	19105	1.09452	701764	30.2126	209810	2.41218	38530	1.59191	54570	1.87124	159651	55.5442	16609	0.249456
574	A	5	2	48	35.08	36.824	4607	6.54325	17400	0.97922	756387	31.9887	197928	2.23536	37192	1.50947	64799	2.18273	158963	54.3273	15857	0.233952
574	A	5	2	50	35.1	36.844	4296	6.92989	18512	1.18323	579177	27.8195	197859	2.53794	35374	1.6306	114687	4.38765	142343	55.2516	15492	0.259597
574	A	5	2	52	35.12	36.864	4252	6.20526	18013	1.04162	721686	31.3611	180833	2.0985	34661	1.44547	199042	6.88917	144445	50.7243	15473	0.234569
574	A	5	2	54	35.14	36.884	4953	7.05485	17324	0.977739	804187	34.1078	192853	2.18429	36280	1.47668	13529	0.457026	156169	53.5255	14607	0.216128
574	A	5	2	56	35.16	36.904	4767	7.23915	15744	0.947355	683058	30.8871	206080	2.48853	36162	1.56926	6316	0.227478	154351	56.4025	15127	0.23863
574	A	5	2	58	35.18	36.924	5762	8.05136	14847	0.822034	632503	26.3169	225752	2.50837	40033	1.59851	6307	0.209014	179173	60.2442	17196	0.249605
574	A	5	2	60	35.2	36.944	5422	7.58518	18507	1.02588	775099	32.288	213541	2.37548	38849	1.55305	8379	0.278006	162362	54.656	16410	0.238476
574	A	5	2	62	35.22	36.964	4869	7.7824	19246	1.2189	599463	28.5307	212609	2.70221	37751	1.72426	16381	0.620969	148587	57.148	16415	0.272549
574	A	5	2	64	35.24	36.984	5535	7.64106	16596	0.907809	786304	32.3224	200291	2.19868	38072	1.5019	9494	0.310843	165253	54.8949	15513	0.222465
574	A	5	2	66	35.26	37.004	4744	7.46726	18136	1.13113	645292	30.2447	205639	2.57387	35316	1.58851	8255	0.308169	149009	56.4386	15153	0.247768
574	A	5	2	68	35.28	37.024	4796	7.01156	16380	0.948865	731930	31.8626	212371	2.46885	38795	1.62073	7895	0.273743	157964	55.5699	16045	0.243671
574	A	5	2	70	35.3	37.044	4565	6.72474	13969	0.815372	772508	33.8856	178703	2.0933	34725	1.46176	5561	0.194287	154053	54.6074	14217	0.217557
574	A	5	2	72	35.32	37.064	4756	6.73316	15043	0.843853	894372	37.7027	181645	2.04486	33964	1.37403	6943	0.23312	149301	50.8612	14087	0.207169
574	A	5	2	74	35.34	37.084	4326	6.21333	14531	0.826968	988324	42.2682	161937	1.84947	31032	1.27364	7947	0.270705	136306	47.1085	12677	0.18914
574	A	5	2	76	35.36	37.104	3818	5.57941	14483	0.838622	999169	43.4778	156180	1.81485	29294	1.2233	8172	0.283228	132527	46.6019	11916	0.180889
574	A	5	2	78	35.38	37.124	4264	6.41936	15578	0.92927	828071	37.121	176216	2.10952	32914	1.41598	8023	0.286462	142145	51.4936	14379	0.224871
574	A	5	2	80	35.4	37.144	4457	7.73302	18310	1.25878	490564	25.3442	208249	2.87312	35631	1.76659	8195	0.337218	144664	60.3968	16104	0.290249
574	A	5	2	82	35.42	37.164	5010	7.81347	19298	1.19254	541956	25.1679	219473	2.72177	38556	1.7183	8946	0.330896	161912	60.762	18091	0.293089
574	A	5	2	84	35.44	37.184	4937	7.55241	18364	1.11313	613187	27.9314	217874	2.65028	37690	1.64759	10036	0.364115	158862	58.4775	16587	0.263585
574	A	5	2	86	35.46	37.204	5093	7.76171	18611	1.12385	516158	23.423	229940	2.78652	39983	1.74124	15137	0.547115	169964	62.3286	18191	0.287985
574	A	5	2	88	35.48	37.224	4751	7.76975	16691	1.08158	551402	26.8514	191786	2.49404	34039	1.59074	25560	0.991376	149823	58.9586	15453	0.262521
574	A	5	2	90	35.5	37.244	4006	7.62187	15043	1.13407	487772	27.6341	181274	2.74252	31011	1.68604	14553	0.656688	127237	58.252	13800	0.272747
574	A	5	2	92	35.52	37.264	4007	7.16508	14845	1.05181	532321	28.3434	176973	2.51636	31268	1.59773	26322	1.11629	134697	57.9571	13580	0.25225
574	A	5	2	94	35.54	37.284	3955	7.27118	13809	1.00595	497768	27.2497	176694	2.58312	30972	1.62715	10576	0.461143	134584	59.5386	13781	0.26319
574	A	5	2	96	35.56	37.304	3747	6.56573	12956	0.89955	658156	34.3404	157249	2.19104	28121	1.40809	16602	0.689946	127339	53.6917	11735	0.213605
574	A	5	2	100	35.6	37.344	2929	4.86313	12029	0.791373	912543	45.1156	124522	1.64402	23135	1.09766	62039	2.44296	109774	43.8574	10894	0.187894
574	A	5	2	102	35.62	37.364	3353	5.85126	11633	0.804383	776576	40.3531	142115	1.97206	26146	1.30383	26847	1.11114	115261	48.3999	11273	0.204355
574	A	5	2	104	35.64	37.384	4234	7.98696	13831	1.03381	402155	22.5892	197856	2.96786	32995	1.7786	8229	0.368157	138759	62.9852	14808	0.290173
574	A	5	2	106	35.66	37.404	3540	6.63733	12059	0.895894	543663	30.3526	157853	2.35346	29552	1.58335	5640	0.250798	127865	57.6884	12229	0.238183
574	A	5	2	108	35.68	37.424	3764	7.17717	12484	0.943219	482048	27.3697	176001	2.66859	29452	1.60479	5835	0.263876	130145	59.7142	13047	0.258431
574	A	5	2	110	35.7	37.444	3457	6.8504	12076	0.948189	516639	30.4846	161835	2.55007	27433	1.55342	6033	0.283534	119709	57.0808	12098	0.249035
574	A	5	2	112	35.72	37.464	4358	7.48615	15183	1.03344	539833	27.6126	202351	2.76401	34635	1.70015	7869	0.320587	142231	58.7911	16359	0.291916
574	A	5	2	114	35.74	37.484	4326	6.71615	15902	0.97823	702132	32.4586	191902	2.36907	33865	1.5024	8477	0.312127	148356	55.4224	14948	0.241072
574	A	5	2	116	35.76	37.504	3984	7.92388	13545	1.06746	376740	22.3119	194811	3.08103	31716	1.80259	6301	0.297224	132072	63.2085	14877	0.307371
574	A	5	2	120	35.8	37.544	5096	7.61801	17699	1.04837	651671	29.008	223222	2.65346	37954	1.62133	8232	0.291859	159811	57.4865	17550	0.272533
574	A	5	2	122	35.82	37.564	4873	7.65393	17097	1.06405	563996	26.3779	219063	2.73603	37223	1.6707	8470	0.31552	158525	59.9146	16381	0.267275
574	A	5	2	124	35.84	37.584	3839	5.89489	14818	0.901577	744725	34.0511	188569	2.30246	32433	1.42313	8294	0.302049	148581	54.8994	14132	0.225419
574	A	5	2	128	35.88	37.624	3839	5.71982	15744	0.929469	967553	42.9256	168990	2.00212	29830	1.27004	10495	0.370853	129923	46.5797	13079	0.202427
574	A	5	2	130	35.9	37.644	3727	5.41532	14596	0.840338	989218	42.799	164939	1.90569	30692	1.27436	12170	0.419383	134851	47.1483	13094	0.197636
574	A	5	2	132	35.92	37.664	3283	4.91098	16127	0.955885	1034782	46.0917	152124	1.8095	27353	1.16924	25642	0.909713	122149	43.9677	11927	0.185335
574	A	5	2	134	35.94	37.684	2934	3.9044	13955	0.735833	1422429	56.364	121911	1.29003	22919	0.871546	44588	1.40724	110201	35.2879	10056	0.139011
574	A	5	2	136	35.96	37.704	3228	4.38878	12810	0.690104	1300952	52.6681	131083	1.41716	24477	0.950974	40097	1.29294	117512	38.4449	10408	0.146996
574	A	5	2	138	35.98	37.724	3314	4.2696	15568	0.794736	1305524	50.0837	145178	1.4873	28270	1.04078	69972	2.13803	129101	40.0231	12160	0.162741
574	A	5	2	140	36	37.744	3003	3.92856	12864	0.666821	1371297	53.4178	131474	1.36767	25773	0.963481	38358	1.19012	121776	38.3342	9664	0.13133
574	A	5	3	4	36.14	37.884	3360	4.46641	17625	0.928333	1213440	48.0302	153753	1.6252	30137	1.14477	64693	2.03954	130047	41.5974	12173	0.168092
574	A	5	3	6	36.16	37.904	3631	5.52974	15387	0.928512	787968	35.7325	156182	1.89135	30416	1.32367	135574	4.89677	135040	49.4865	13331	0.210897
574	A	5	3	8	36.18	37.924	4123	6.8515	16445	1.08283	587790	29.0852	173383	2.29109	31547	1.49807	33847	1.33398	144083	57.6145	14068	0.242848
574	A	5	3	10	36.2	37.944	4270	6.007	20089	1.11981	890576	37.3059	179312	2.00587	33347	1.34056	12831	0.428101	152402	51.5902	13860	0.202546
574	A	5	3	12	36.22	37.964	6087	8.91769	25184	1.46194	330020	14.3968	267012	3.1106	45055	1.88622	14191	0.49308	196892	69.4103	21248	0.323368
574	A	5	3	14	36.24	37.984	5360	7.96761	18776	1.10592	600300	26.5711	210324	2.48609	38122	1.61935	12664	0.446468	166496	59.5544	16132	0.249104
574	A	5	3	16	36.26	38.004	4951	8.0576	20092	1.29566	414503	20.0871	220738	2.85663	38478	1.78948	28691	1.10742	164726	64.5092	17562	0.296904
574	A	5	3	18	36.28	38.024	4657	7.98272	19743	1.34095	384993	19.6505	215453	2.93671	37169	1.82065	63171	2.56814	153678	63.3874	17572	0.312893
574	A	5	3	20	36.3	38.044	6164	8.89412	20607	1.17818	376458	16.1746	246778	2.83146	44144	1.82017	64208	2.19728	191869	66.618	19089	0.286123
574	A	5	3	22	36.32	38.064	5478	8.05284	18184	1.05918	472604	20.6872	231069	2.70105	42165	1.77125	39615	1.38115	181129	64.071	18096	0.276337
574	A	5	3	24	36.34	38.084	5596	8.28046	20511	1.20259	448526	19.7625	236457	2.78223	41202	1.74219	51324	1.80116	180156	64.1464	18382	0.282552
574	A	5	3	26	36.36	38.104	5924	8.62064	21554	1.24282	369022	15.9902	240946	2.7881	43930	1.82678	46125	1.5919	193129	67.6268	20692	0.312793
574	A	5	3	28	36.38	38.124	5466	8.20498	15215	0.904972	419801	18.7641	223891	2.67244	40161	1.72271	9893	0.352202	185809	67.1153	16885	0.263293
574	A	5	3	30	36.4	38.144	3817	5.79614	17191	1.03436	925113	41.83	162286	1.95957	29332	1.27279	26898	0.968706	128461	46.939	12639	0.19937
574	A	5	3	32	36.42	38.164	5630	8.40019	21712	1.28362	444650	19.7549	236681	2.80807	41656	1.77606	88033	3.11517	174274	62.5691	18897	0.292889
574	A	5	3	34	36.44	38.184	5579	7.84962	21695	1.2095	490714	20.5588	243050	2.71927	44080	1.77229	118193	3.94402	182126	61.661	19535	0.285519
574	A	5	3	36	36.46	38.204	4623	7.407	21204	1.34615	483314	23.0582	213115	2.71517	36699	1.68025	106160	4.03399	154265	59.4748	17094	0.284506
574	A	5	3	38	36.48	38.224	4633	7.28885	21425	1.33559	582020	27.2654	217888	2.7258	36394	1.63616	48351	1.80409	152372	57.6831	15975	0.261076
574	A	5	3	40	36.5	38.244	4745	6.32402	19955	1.05381	837352	33.2309	213357	2.26114	37599	1.43197	35020	1.10695	169533	54.3698	15988	0.221351
574	A	5	3	42	36.52	38.264	5381	7.32827	17509	0.944834	672451	27.2694	229004	2.47997	39880	1.55201	8774	0.283395	182812	59.9087	16497	0.233385
574	A	5	3	44	36.54	38.284	5214	6.18149	20342	0.955589	1034746	36.5286	221960	2.09248	39959	1.35375	9609	0.270182	183658	52.3936	18216	0.224339
574	A	5	3	46	36.56	38.304	5142	6.59978	18329	0.932162	912102	34.8592	222143	2.26722	38272	1.40371	8564	0.260693	173062	53.4497	17065	0.227527
574	A	5	3	48	36.58	38.324	4174	5.1106	17916	0.869192	1255368	45.7685	174789	1.70176	31582	1.10499	8658	0.251416	152781	45.0127	14216	0.180812
574	A	5	3	50	36.6	38.344	4778	5.71336	19510	0.924395	1096475	39.041	207000	1.96825	36889	1.2605	11519	0.326675	175760	50.5722	15591	0.193664
574	A	5	3	54	36.64	38.384	4552	5.32374	18377	0.851617	1294498	45.0809	186559	1.73498	32796	1.09606	9887	0.274242	161402	45.4224	17786	0.216084
574	A	5	3	56	36.66	38.404	4536	6.58259	18637	1.07165	751212	32.4611	216818	2.50197	35648	1.47829	8379	0.288384	158566	55.3707	16274	0.245328
574	A	5	3	58	36.68	38.424	4769	7.98464	19887	1.31933	389344	19.4106	259554	3.45557	38980	1.86496	9131	0.362578	162034	65.2801	18528	0.322245
574	A	5	3	60	36.7	38.444	4833	6.6955	19849	1.08958	795206	32.8037	218995	2.41248	37183	1.47201	8713	0.286279	165010	55.0077	16174	0.232763
574	A	5	3	62	36.72	38.464	5257	8.0041	19694	1.18813	395427	17.9274	273349	3.30945	42198	1.83598	9336	0.337125	183097	67.0815	19999	0.31631
574	A	5	3	64	36.74	38.484	5000	8.27304	18946	1.24213	256109	12.6182	272872	3.5902	41846	1.97856	9155	0.35926	179838	71.6017	19602	0.336919
574	A	5	3	66	36.76	38.504	4883	7.90792	19416	1.24592	370720	17.8772	251447	3.23807	39988	1.85057	8831	0.339188	172498	67.2212	19020	0.319975
574	A	5	3	68	36.78	38.524	5212	8.45054	20762	1.33384	320425	15.4698	260387	3.35709	41415	1.91884	9825	0.377805	176277	68.7737	18907	0.318444
574	A	5	3	72	36.82	38.564	4615	8.23487	18873	1.33439	342484	18.1971	229692	3.25908	35435	1.80683	8287	0.350702	154857	66.491	17590	0.326047
574	A	5	3	74	36.84	38.584	5156	8.68111	20128	1.34282	313112	15.6978	250366	3.35198	38898	1.8715	10252	0.40938	168630	68.3193	18644	0.326085
574	A	5	3	76	36.86	38.604	5848	9.5261	20521	1.32453	153811	7.46057	290969	3.76893	44760	2.08352	10964	0.423577	191406	75.0257	22874	0.387061
574	A	5	3	78	36.88	38.624	4834	7.43948	18198	1.10972	480372	22.0136	224006	2.74132	36378	1.59983	9291	0.33912	174103	64.4746	17661	0.282346
574	A	5	3	82	36.92	38.664	5295	8.59712	20400	1.31242	275933	13.3404	277866	3.58746	43202	2.00443	11204	0.431436	180137	70.378	20680	0.348793
574	A	5	3	84	36.94	38.684	5340	8.21079	18538	1.12944	396721	18.1638	251339	3.07304	39854	1.75112	9787	0.356902	181142	67.0208	18417	0.294166
574	A	5	3	86	36.96	38.704	5600	8.69533	18979	1.16769	301725	13.9504	268492	3.31507	41611	1.84632	11165	0.411161	188147	70.2978	19604	0.316208
574	A	5	3	88	36.98	38.724	5100	8.22975	19399	1.24037	327571	15.7398	267030	3.42642	40867	1.88447	11252	0.430628	176961	68.7133	20001	0.335273
574	A	5	3	90	37	38.744	5574	9.14444	19013	1.23594	179243	8.75607	274856	3.58558	43327	2.03118	11253	0.437839	188571	74.4409	21598	0.368072
574	A	5	3	92	37.02	38.764	4858	7.97891	17737	1.15431	416097	20.3497	230451	3.00974	37474	1.7588	11579	0.451038	164463	64.9981	17547	0.299377
574	A	5	3	94	37.04	38.784	4853	8.11587	21314	1.41236	328580	16.3622	236397	3.14363	38268	1.82878	12697	0.503595	169732	68.3023	19068	0.331253
574	A	5	3	96	37.06	38.804	4285	8.14507	18509	1.39406	270502	15.3106	229245	3.46504	36110	1.96142	13249	0.597286	150382	68.7838	17358	0.342747
574	A	5	3	98	37.08	38.824	4301	7.78436	17147	1.22969	428183	23.076	206818	2.9765	32784	1.69557	8972	0.385122	143627	62.5513	16036	0.301494
574	A	5	3	100	37.1	38.844	4711	8.99061	17290	1.30745	139005	7.8992	252305	3.82883	38753	2.1134	8351	0.377981	163536	75.0993	19329	0.383191
574	A	5	3	102	37.12	38.864	5076	9.5872	16734	1.25235	134028	7.53777	263727	3.96085	40017	2.15981	7357	0.329554	164546	74.7832	19839	0.389242
574	A	5	3	104	37.14	38.884	4595	7.54717	14894	0.969316	502253	24.5639	213253	2.78521	33804	1.5866	8643	0.336681	156730	61.9437	15669	0.267344
574	A	5	3	106	37.16	38.904	4916	9.91532	16981	1.35711	103881	6.2389	273657	4.389	39076	2.25219	7330	0.350634	154682	75.0726	20251	0.424298
574	A	5	3	108	37.18	38.924	4651	8.1499	15174	1.05356	319518	16.6716	238165	3.31854	38081	1.90684	7476	0.310692	161904	68.2669	17689	0.321987
574	A	5	3	110	37.2	38.944	4866	8.88172	16378	1.18452	250963	13.6399	244491	3.54856	38470	2.00654	7187	0.31112	159537	70.0702	18853	0.357466
574	A	5	3	112	37.22	38.964	4628	8.58199	14786	1.08643	294676	16.2711	225891	3.33087	35092	1.85953	7556	0.332309	152906	68.2285	16059	0.309345
574	A	5	3	114	37.24	38.984	4829	9.00116	15030	1.11008	262279	14.5573	230624	3.4183	36546	1.94662	7110	0.314316	154519	69.3058	17889	0.346383
574	A	5	3	116	37.26	39.004	4763	9.16423	14546	1.10896	157007	8.99521	242516	3.71039	37131	2.04151	7108	0.324353	160459	74.2892	18318	0.36612
574	A	5	3	118	37.28	39.024	4608	8.49884	16855	1.23178	309732	17.0102	222634	3.26515	35099	1.84988	8229	0.359957	151985	67.452	17338	0.332182
574	A	5	3	120	37.3	39.044	4311	7.27746	16307	1.09076	567575	28.53	197243	2.64769	32836	1.58399	10620	0.425189	143196	58.1673	15828	0.27756
574	A	5	3	122	37.32	39.064	4183	6.61286	15565	0.975004	675723	31.8088	194164	2.44081	32921	1.48722	11911	0.446586	147176	55.9868	14734	0.241965
574	A	5	3	124	37.34	39.084	4013	6.34642	16285	1.02048	661360	31.144	201413	2.53286	34066	1.5395	16249	0.609455	148590	56.5452	15957	0.262144
574	A	5	3	126	37.36	39.104	4338	6.71292	17049	1.04538	673871	31.051	195693	2.40802	32956	1.45733	42611	1.56386	149063	55.5058	15908	0.255721
574	A	5	3	128	37.38	39.124	4215	6.59109	17398	1.07799	663898	30.9127	205296	2.55272	33186	1.48291	13139	0.487279	150519	56.6366	15923	0.258651
574	A	5	3	130	37.4	39.144	4014	6.15028	15999	0.971327	784685	35.8005	186358	2.27054	30773	1.34737	10499	0.381523	143335	52.8465	14573	0.231951
574	A	5	3	132	37.42	39.164	3606	5.27837	14405	0.835492	931089	40.5828	174332	2.02915	29440	1.23144	9948	0.345355	140536	49.5003	12961	0.19708
574	A	5	3	134	37.44	39.184	4656	7.56349	18715	1.20463	475903	23.02	228684	2.95399	36143	1.67778	9105	0.350788	161019	62.9409	17094	0.288458
574	A	5	3	136	37.46	39.204	3937	5.63609	15044	0.853358	898270	38.291	194684	2.21619	31973	1.30797	8709	0.29569	148587	51.1847	14459	0.215021
574	A	5	4	4	37.64	39.384	4368	5.82488	15862	0.838142	931665	36.9948	177120	1.87817	31880	1.21485	7795	0.246533	164608	52.8204	13154	0.182218
574	A	5	4	6	37.66	39.404	4375	5.20996	16766	0.791117	1191309	42.2432	165146	1.56382	31708	1.07901	9991	0.282176	169820	48.6622	13621	0.168498
574	A	5	4	8	37.68	39.424	3804	5.13376	16954	0.906614	1022435	41.0873	169655	1.82065	30898	1.19159	8713	0.278881	152133	49.4043	12617	0.176881
574	A	5	4	10	37.7	39.444	4030	5.33031	17017	0.891837	1033955	40.7217	166478	1.75093	30497	1.15267	9964	0.312562	156008	49.6524	13652	0.187574
574	A	5	4	12	37.72	39.464	4999	6.12621	16364	0.794609	933683	34.071	194849	1.89876	36531	1.2793	48274	1.40306	183910	54.2326	15271	0.194404
574	A	5	4	14	37.74	39.484	3748	5.16936	18191	0.994145	1034612	42.4905	152685	1.67455	28281	1.11464	13209	0.432079	144502	47.9577	11659	0.167043
574	A	5	4	16	37.76	39.504	2932	3.42375	15661	0.724624	1581922	55.0047	121222	1.1256	24058	0.802782	11249	0.311535	136981	38.4897	9668	0.117275
574	A	5	4	18	37.78	39.524	3369	4.12988	14863	0.721936	1328611	48.4966	140582	1.37035	27732	0.971445	9969	0.28983	148729	43.8712	11684	0.148785
574	A	5	4	20	37.8	39.544	4505	6.19196	15732	0.856787	958528	39.2297	164890	1.80215	30459	1.19633	8214	0.267759	152016	50.277	12488	0.178302
574	A	5	4	22	37.82	39.564	3243	4.14341	13485	0.68268	1294600	49.2519	142104	1.44371	26839	0.97989	9969	0.302077	140034	43.0517	10894	0.144586
574	A	5	4	24	37.84	39.584	2584	2.99742	11238	0.516535	1740500	60.1183	101396	0.935277	21237	0.703962	10543	0.290052	123033	34.3419	8019	0.0966286
574	A	5	4	26	37.86	39.604	3034	3.99851	13870	0.724294	1224808	48.0649	128812	1.3499	23771	0.895222	9728	0.304062	140406	44.5261	10007	0.136999
574	A	5	4	30	37.9	39.644	3444	4.02204	14860	0.687635	1502377	52.2444	133565	1.24034	25716	0.858198	15374	0.42582	143763	40.3996	10052	0.121946
574	A	5	4	32	37.92	39.664	5076	6.61062	23971	1.23698	782012	30.3257	224949	2.32953	37680	1.40227	12760	0.394118	183292	57.4395	19317	0.26133
574	A	5	4	34	37.94	39.684	5458	7.3895	24977	1.33991	598274	24.119	246654	2.65542	41957	1.62325	11553	0.370964	190950	62.2082	20888	0.29377
574	A	5	4	36	37.96	39.704	5701	7.13558	20958	1.0394	732287	27.2921	235734	2.3462	40657	1.45417	11576	0.343631	199708	60.1479	18540	0.241056
574	A	5	4	38	37.98	39.724	5482	6.70096	21481	1.04042	765505	27.8627	230378	2.23925	41253	1.44097	10857	0.314748	204530	60.1591	19050	0.241893
574	A	5	4	40	38	39.744	5558	7.61824	23941	1.30027	460828	18.8084	264854	2.88673	43700	1.71166	10354	0.336589	203219	67.0266	21878	0.311511
574	A	5	4	42	38.02	39.764	3548	3.70637	15762	0.652427	1673964	52.0701	141650	1.17665	26655	0.795691	12423	0.307785	163697	41.1484	13141	0.142601
574	A	5	4	44	38.04	39.784	5853	9.11532	23782	1.46756	217231	10.0738	288617	3.5742	44659	1.98748	11599	0.42842	194751	72.9827	22907	0.370588
574	A	5	4	46	38.06	39.804	4543	5.94408	17552	0.909964	911729	35.521	196349	2.04284	34951	1.30678	14055	0.436143	170385	53.6439	14373	0.195353
574	A	5	4	48	38.08	39.824	4577	6.21129	19789	1.06409	778241	31.4479	207559	2.23979	34863	1.35197	46415	1.49388	171380	55.9639	16116	0.227189
574	A	5	4	50	38.1	39.844	4162	5.32519	16731	0.848224	1085298	41.3484	169649	1.72603	30147	1.10224	64576	1.95957	154308	47.5082	13703	0.182129
574	A	5	4	52	38.12	39.864	4116	5.22999	15481	0.779434	1158590	43.8361	172559	1.74352	29944	1.08726	13448	0.405264	152930	46.7589	12086	0.159528
574	A	5	4	54	38.14	39.884	4056	5.16079	16733	0.843622	1083476	41.0502	178783	1.80888	30337	1.10304	11358	0.342749	161748	49.5227	12717	0.168087
574	A	5	4	56	38.16	39.904	4574	5.46111	15223	0.720179	1203376	42.7822	173359	1.64587	31660	1.08018	13115	0.371371	166319	47.783	12591	0.156162
574	A	5	4	58	38.18	39.924	3810	5.03371	14771	0.773266	1168964	45.9877	153669	1.61441	28157	1.06304	12160	0.381024	141533	44.9954	11039	0.151504
574	A	5	4	60	38.2	39.944	3789	4.5651	13639	0.651124	1360071	48.7938	152099	1.45719	28343	0.975826	12635	0.361041	148523	43.0592	10923	0.136709
574	A	5	4	62	38.22	39.964	3361	4.01657	14187	0.671788	1384768	49.2765	151198	1.4368	28658	0.978662	10994	0.3116	150087	43.1595	11968	0.148572
574	A	5	4	64	38.24	39.984	3452	4.31454	13603	0.67368	1285838	47.855	153342	1.52401	28077	1.0028	12687	0.376078	146644	44.1037	11574	0.150272
574	A	5	4	66	38.26	40.004	3142	3.78335	11082	0.528742	1589923	57.0064	122513	1.17305	24212	0.833109	13683	0.390758	124842	36.1724	8967	0.112162
574	A	5	4	68	38.28	40.024	3417	4.10546	11486	0.546815	1430606	51.1815	139529	1.33305	27549	0.945851	13948	0.397451	143057	41.3592	10467	0.130638
574	A	5	4	70	38.3	40.044	3149	3.64148	10249	0.469615	1645653	56.6658	124394	1.14385	24598	0.812841	15956	0.437608	131952	36.7171	9305	0.111777
574	A	5	4	72	38.32	40.064	3074	3.78641	13127	0.640685	1492463	54.7399	126064	1.23475	23995	0.844588	16711	0.488182	128700	38.146	9341	0.119522
574	A	5	4	74	38.34	40.084	3559	4.57758	11584	0.590366	1276751	48.898	143367	1.46629	26123	0.960132	20605	0.628544	138081	42.7354	10754	0.143684
574	A	5	4	76	38.36	40.104	2912	4.06939	10099	0.559206	1252967	52.138	122448	1.36067	22773	0.909408	20510	0.679766	119445	40.1655	8131	0.118035
574	A	5	4	78	38.38	40.124	3250	4.11867	9822	0.493206	1384205	52.2337	128110	1.29098	24732	0.895639	18602	0.559099	132140	40.2953	8618	0.113451
574	A	5	4	80	38.4	40.144	3189	4.66257	11258	0.65221	1038062	45.193	144474	1.67967	25710	1.07417	16841	0.583975	130733	45.9941	10556	0.160324
574	A	5	4	82	38.42	40.164	3995	6.60644	17027	1.11569	589944	29.0495	176580	2.32197	29703	1.40363	24196	0.948965	146560	58.3194	13647	0.234432
574	A	5	4	84	38.44	40.184	3773	5.29897	13210	0.735127	949549	39.7099	159505	1.78132	28829	1.157	15003	0.499733	149798	50.6241	13290	0.193892
574	A	5	4	86	38.46	40.204	3490	5.01125	15341	0.87283	1003001	42.8843	157917	1.80307	27272	1.11902	13589	0.462768	137954	47.6652	12171	0.181542
574	A	5	4	88	38.48	40.224	4482	6.83951	14315	0.865565	684387	31.0979	178248	2.16293	31854	1.38905	10343	0.37433	155394	57.0603	13275	0.210435
574	A	5	4	90	38.5	40.244	4362	7.21953	13553	0.88882	523817	25.8154	184428	2.42725	31722	1.50032	7111	0.279132	154711	61.6156	14767	0.25389
574	A	5	4	92	38.52	40.264	3968	7.37893	14710	1.0839	366354	20.2861	191695	2.83463	31283	1.66238	6044	0.266564	147939	66.1989	14936	0.288527
574	A	5	4	94	38.54	40.284	3777	6.84695	14311	1.02796	478710	25.8404	175458	2.52922	28701	1.48678	6524	0.280492	141513	61.7296	13732	0.258591
574	A	5	4	96	38.56	40.304	3730	6.42241	12148	0.8288	581787	29.8284	163784	2.24246	27090	1.3329	6760	0.276053	142044	58.8517	12146	0.217246
574	A	5	4	98	38.58	40.324	4445	8.17677	14180	1.03357	292537	16.0239	196971	2.88122	31815	1.67241	6555	0.285982	157315	69.6349	15242	0.291261
574	A	5	4	100	38.6	40.344	4074	8.10654	14220	1.12116	254367	15.0713	197862	3.1307	31708	1.80295	7037	0.332091	146484	70.1377	14395	0.297547
574	A	5	4	102	38.62	40.364	3871	7.62059	13743	1.07202	307361	18.0174	192135	3.00771	29381	1.65285	6223	0.29055	143621	68.0346	14879	0.304277
574	A	5	4	104	38.64	40.384	4952	7.71659	13861	0.855844	483660	22.442	204372	2.53239	35086	1.56235	7728	0.285606	171630	64.3553	15439	0.249916
574	A	5	4	106	38.66	40.404	3915	6.16285	14889	0.928691	613546	28.759	191641	2.39885	31536	1.41859	8468	0.316145	157834	59.7857	14074	0.230143
574	A	5	4	108	38.68	40.424	4600	7.09692	14330	0.87602	579602	26.6268	196781	2.41412	32777	1.44505	8529	0.31208	164283	60.989	14975	0.239999
574	A	5	4	110	38.7	40.444	3050	4.24482	12625	0.696219	1076928	44.6295	130345	1.4425	23455	0.932813	9806	0.323673	142089	47.5846	10090	0.145875
574	A	5	4	112	38.72	40.464	3777	6.245	14717	0.964184	588393	28.9687	180914	2.3786	28773	1.35947	9409	0.368964	149516	59.4866	13298	0.228403
574	A	5	4	114	38.74	40.484	3116	4.04931	11937	0.614659	1284226	49.6938	119673	1.23664	22755	0.845008	13457	0.414751	137579	43.0212	9233	0.12464
574	A	5	4	116	38.76	40.504	2721	3.69122	12632	0.678999	1184607	47.8512	120825	1.30335	22824	0.884776	18011	0.579475	137470	44.8741	9715	0.136903
574	A	5	4	118	38.78	40.524	2804	3.67499	12848	0.66722	1280519	49.9736	119571	1.24614	22372	0.837882	38567	1.19881	134023	42.2672	9851	0.134118
574	A	5	4	120	38.8	40.544	2667	3.48502	11311	0.58565	1378023	53.6186	109366	1.13639	19386	0.723887	31386	0.972688	125188	39.3633	8434	0.114484
574	A	5	4	122	38.82	40.564	2048	2.50703	9530	0.462252	1644614	59.9475	92638	0.901744	17610	0.616013	25285	0.734089	117955	34.7451	6786	0.0862927
574	A	5	4	124	38.84	40.584	2672	3.45523	11074	0.567415	1334206	51.3736	111114	1.14254	21407	0.791037	15483	0.474844	135217	42.0745	8996	0.120843
574	A	5	4	126	38.86	40.604	3181	4.3972	15219	0.833593	1110680	45.7171	138286	1.52004	25516	1.00792	30551	1.0016	136386	45.3658	10916	0.156749
574	A	5	4	130	38.9	40.644	2644	3.44199	13740	0.708745	1315258	50.9842	127001	1.31468	22596	0.840582	14947	0.461485	134463	42.1209	9421	0.127402
574	A	5	4	132	38.92	40.664	3118	4.35879	12834	0.710898	1117708	46.5259	132091	1.46834	24686	0.986145	11546	0.382804	135019	45.4183	10246	0.14879
574	A	5	4	134	38.94	40.684	2839	4.61865	11310	0.729068	864225	41.8652	134227	1.73642	24097	1.12025	10554	0.407214	126038	49.3399	10848	0.183328
574	A	5	4	136	38.96	40.704	2919	4.47467	11094	0.673861	1020949	46.6023	119994	1.46268	23465	1.02789	12784	0.464782	122377	45.1412	9583	0.152601
574	A	5	4	138	38.98	40.724	3392	5.17645	13718	0.829511	901886	40.9831	135084	1.63924	25044	1.09214	11591	0.41952	135301	49.6848	11058	0.1753
574	A	5	4	140	39	40.744	3400	4.3919	13436	0.6877	1242045	47.7736	139175	1.42955	25821	0.953119	13134	0.402371	142279	44.2243	10242	0.137432
574	A	5	5	2	39.12	40.864	2219	2.59853	10282	0.477094	1840797	64.188	93574	0.871345	18594	0.62222	13139	0.364913	109276	30.7923	7035	0.0855785
574	A	5	5	4	39.14	40.884	1379	1.77759	7083	0.361775	1705150	65.4494	74610	0.764764	14226	0.524022	12373	0.378266	98870	30.6674	5729	0.0767141
574	A	5	5	6	39.16	40.904	1680	1.96534	5071	0.235059	2022936	70.4671	65914	0.613154	12934	0.432375	13418	0.372281	91821	25.8474	5537	0.0672871
574	A	5	5	8	39.18	40.924	1764	1.99956	5243	0.235489	2087952	70.4747	67837	0.611458	14531	0.470687	14621	0.393069	94438	25.759	4753	0.0559672
574	A	5	5	10	39.2	40.944	2042	2.5221	5875	0.287521	1791875	65.9008	78064	0.766692	15801	0.557687	15776	0.462124	99014	29.4272	5916	0.0759038
574	A	5	5	12	39.22	40.964	2545	3.21841	10466	0.524433	1633841	61.5234	98515	0.990649	20407	0.737451	15133	0.453873	106629	32.4471	7973	0.104738
574	A	5	5	14	39.24	40.984	2572	3.22307	10517	0.522211	1549165	57.8061	112979	1.1258	22248	0.796692	13753	0.408745	119406	36.0057	8578	0.111664
574	A	5	5	16	39.26	41.004	3833	4.45701	14620	0.673609	1519507	52.612	143191	1.32399	26630	0.884864	16880	0.465514	141006	39.4538	10695	0.129186
574	A	5	5	18	39.28	41.024	3890	4.76967	14535	0.70617	1302210	47.5441	159102	1.55124	29254	1.025	13704	0.398512	148629	43.852	12039	0.153341
574	A	5	5	20	39.3	41.044	4059	4.71258	15378	0.707449	1417128	48.9921	162514	1.50036	30450	1.01025	14345	0.394999	152274	42.5415	11676	0.14082
574	A	5	5	22	39.32	41.064	4230	4.73206	14579	0.646239	1499348	49.9447	151961	1.35178	30276	0.967851	12741	0.338041	155623	41.8919	10967	0.127446
574	A	5	5	24	39.34	41.084	2985	3.2415	11054	0.475637	1846882	59.7196	111176	0.960011	22096	0.68567	14227	0.366412	131880	34.4609	8000	0.0902445
574	A	5	5	26	39.36	41.104	3674	4.16128	13483	0.605104	1587766	53.549	137987	1.24277	26771	0.866469	12144	0.326216	143599	39.1369	9547	0.112327
574	A	5	5	28	39.38	41.124	3785	4.31157	14171	0.639624	1534507	52.0493	146693	1.32875	27611	0.898776	10561	0.285318	147252	40.3624	10502	0.124271
574	A	5	5	30	39.4	41.144	3476	3.85896	12286	0.540451	1695516	56.0492	127385	1.12453	24224	0.768487	10956	0.288468	139522	37.2718	8512	0.0981639
574	A	5	5	32	39.42	41.164	3545	4.31476	12704	0.612684	1343077	48.6764	133021	1.28743	24764	0.861314	8185	0.236273	149823	43.8799	10383	0.131278
574	A	5	5	34	39.44	41.184	4404	5.54285	13106	0.653599	1221094	45.7627	155737	1.55863	29371	1.05634	7591	0.22659	148728	45.0428	11966	0.156446
574	A	5	5	36	39.46	41.204	3969	4.94511	14284	0.70518	1214155	45.0449	166061	1.64523	30078	1.07089	8340	0.246443	154022	46.1768	12779	0.165395
574	A	5	5	38	39.48	41.224	3270	3.73204	10814	0.489036	1713976	58.2479	118703	1.07727	23723	0.773693	8978	0.243016	128630	35.3255	9409	0.111551
574	A	5	5	40	39.5	41.244	2425	2.83699	11662	0.540598	1759842	61.305	101219	0.941611	19622	0.655978	9142	0.253654	118546	33.3718	7765	0.0943663
574	A	5	5	42	39.52	41.264	2804	3.15883	9291	0.414731	1920632	64.4273	96113	0.860983	19956	0.642425	10117	0.270306	111163	30.1339	7824	0.0915603
574	A	5	5	44	39.54	41.284	2375	2.72665	9442	0.429522	1907167	65.1976	91093	0.831601	19213	0.630321	9884	0.269125	107966	29.8263	7446	0.0888012
574	A	5	5	46	39.56	41.304	2414	2.67571	8917	0.39163	1990491	65.696	91590	0.807261	18683	0.591765	11757	0.309068	110387	29.442	7518	0.0865634
574	A	5	5	48	39.58	41.324	2469	2.92087	10316	0.483569	1751824	61.7104	101338	0.953296	20884	0.706001	12135	0.340476	115168	32.7846	8198	0.100746
574	A	5	5	50	39.6	41.344	2509	2.90695	10551	0.48438	1820560	62.8086	97629	0.899456	20672	0.684416	12303	0.338068	113998	31.782	7988	0.0961402
574	A	5	5	52	39.62	41.364	2816	3.40926	11439	0.548745	1583010	57.0673	112879	1.08669	22689	0.784951	11802	0.338874	125804	36.6495	9117	0.114659
574	A	5	5	56	39.66	41.404	4027	5.26488	15994	0.828552	1115844	43.4398	155077	1.6122	28616	1.0691	14456	0.44824	149929	47.1671	12528	0.170145
574	A	5	5	58	39.68	41.424	3821	5.50357	17756	1.01337	908208	38.952	156688	1.7946	28376	1.16794	13304	0.45447	146927	50.9232	12752	0.190799
574	A	5	5	60	39.7	41.444	4277	5.92523	17212	0.944829	899850	37.1205	162140	1.78616	29638	1.17332	14571	0.478753	157114	52.3754	13606	0.195806
574	A	5	5	62	39.72	41.464	4241	5.7032	17029	0.907392	972861	38.9563	158072	1.69032	28163	1.08226	14752	0.470497	157622	51.0051	13233	0.184858
574	A	5	5	64	39.74	41.484	3905	5.18596	16049	0.844523	1086140	42.9508	150441	1.58869	27573	1.04639	10848	0.341675	149804	47.8716	12351	0.170388
574	A	5	5	66	39.76	41.504	3455	4.62348	13207	0.700294	1237566	49.3135	139113	1.48031	25761	0.985108	9554	0.303223	131812	42.4446	10753	0.149479
574	A	5	5	68	39.78	41.524	3459	4.24012	12980	0.63046	1399045	51.0665	129344	1.26078	23892	0.836913	9131	0.265461	140904	41.5621	10812	0.137678
574	A	5	5	70	39.8	41.544	2108	2.208	9406	0.390381	2163362	67.4737	88876	0.740247	17277	0.517127	11896	0.295519	112286	28.3009	6812	0.0741195
574	A	5	5	72	39.82	41.564	2451	2.51448	9201	0.37402	2221147	67.8513	89370	0.729054	16354	0.479434	13942	0.339223	111993	27.6466	6179	0.0658495
574	A	5	5	74	39.84	41.584	1568	1.49061	6172	0.232488	2597563	73.5295	69840	0.527943	12501	0.339597	16824	0.379318	102516	23.4508	5044	0.0498108
574	A	5	5	76	39.86	41.604	1396	1.34472	6514	0.248628	2560087	73.4309	71761	0.549667	12455	0.34284	17484	0.399433	101934	23.6273	5648	0.0565161
574	A	5	5	78	39.88	41.624	1682	1.62863	7281	0.279346	2489605	71.78	74506	0.573656	13247	0.366534	15389	0.353396	107069	24.9463	7173	0.0721484
574	A	5	5	80	39.9	41.644	1659	1.6359	7146	0.279209	2455384	72.0953	73581	0.576953	12548	0.353578	16984	0.397197	103623	24.5874	7267	0.0744381
574	A	5	5	82	39.92	41.664	2061	2.09366	9734	0.391809	2179765	65.9348	84198	0.680133	13226	0.383934	17289	0.416537	122784	30.0135	8119	0.0856762
574	A	5	5	84	39.94	41.684	3037	3.17017	12461	0.515402	1888670	58.7045	112361	0.932648	21219	0.632941	14672	0.363231	141595	35.5658	10637	0.115342
574	A	5	5	86	39.96	41.704	3034	3.79038	13481	0.667336	1399767	52.0714	136122	1.35226	23657	0.844553	11374	0.337005	135713	40.7976	10742	0.139406
574	A	5	5	88	39.98	41.724	2791	3.6592	8504	0.441779	1421795	55.506	111543	1.16287	18442	0.690931	9741	0.30289	120810	38.1132	9034	0.123037
574	A	5	5	90	40	41.744	3748	4.92242	13288	0.691503	1139459	44.561	154433	1.61281	27050	1.01519	8807	0.274323	147950	46.7563	12202	0.166471
574	A	5	5	92	40.02	41.764	3828	5.39286	15900	0.887564	916693	38.4545	178203	1.9963	27920	1.12399	7819	0.261248	152467	51.6856	13524	0.197916
574	A	5	5	94	40.04	41.784	3387	4.32895	12373	0.626611	1227561	46.7184	150905	1.53368	26632	0.972684	8187	0.248169	147701	45.4253	11016	0.146259
574	A	5	5	96	40.06	41.804	3854	4.87545	13493	0.676343	1169595	44.0571	171429	1.72445	28186	1.01891	9046	0.271404	155091	47.2103	12637	0.166065
574	A	5	5	98	40.08	41.824	3385	4.20305	13823	0.680086	1308577	48.3818	152527	1.50597	25884	0.918413	9046	0.26639	146942	43.9035	10917	0.140812
574	A	5	5	100	40.1	41.844	3886	4.82523	14719	0.724184	1145665	42.3594	166698	1.64592	27227	0.966085	8009	0.235857	164279	49.0844	12318	0.158886
574	A	5	5	102	40.12	41.864	3708	4.45575	13081	0.622842	1221066	43.6916	147316	1.40765	26337	0.904374	8155	0.232413	167874	48.5413	11544	0.144101
574	A	5	5	104	40.14	41.884	4137	5.15086	14097	0.695466	1115751	41.3655	169232	1.67548	28728	1.02211	8301	0.245121	165818	49.6789	12878	0.166561
574	A	5	5	108	40.18	41.924	3754	4.46482	14084	0.66373	1264433	44.7798	148252	1.40208	25987	0.883215	7413	0.209103	165849	47.4645	10740	0.132692
574	A	5	5	110	40.2	41.944	4064	4.95271	14533	0.701778	1116399	40.5121	161512	1.56516	25308	0.881347	7427	0.214663	174013	51.029	11312	0.143205
574	A	5	5	112	40.22	41.964	2315	2.66545	10291	0.469497	1674051	57.3938	115707	1.05936	19056	0.626977	8842	0.241449	135123	37.4365	8940	0.106927
574	A	5	5	114	40.24	41.984	2476	2.78518	10321	0.460024	1793202	60.0633	103250	0.923543	17753	0.570657	8858	0.236317	128851	34.8769	7200	0.0841328
574	A	5	5	116	40.26	42.004	2843	3.27237	10287	0.46917	1660852	56.9238	106207	0.972082	18351	0.603596	8851	0.241621	135101	37.4189	8235	0.0984644
574	A	5	5	118	40.28	42.024	2280	2.57604	9878	0.442223	1810426	60.9081	95636	0.859216	16279	0.525588	10882	0.291596	126229	34.3181	6748	0.0791994
574	A	5	5	120	40.3	42.044	2683	3.0429	10585	0.475678	1732694	58.5148	112091	1.01088	19068	0.617977	11658	0.313579	131629	35.9224	8647	0.101874
574	A	5	5	122	40.32	42.064	2717	2.92313	12101	0.515864	1821859	58.3647	110076	0.941705	19253	0.591912	12420	0.31691	140019	36.2487	8691	0.097131
574	A	5	5	124	40.34	42.084	2335	2.45768	10711	0.446708	1917368	60.0926	105541	0.883331	17641	0.530594	13430	0.335251	138750	35.1413	10294	0.112552
574	A	5	5	126	40.36	42.104	3190	3.47539	13891	0.599656	1686446	54.7095	128584	1.11395	21876	0.681054	12111	0.312931	148666	38.9737	11829	0.133872
574	A	5	5	128	40.38	42.124	3286	3.5501	14752	0.631508	1669612	53.7113	130645	1.12235	23075	0.712385	12033	0.308321	153188	39.8239	12487	0.14014
574	A	5	5	130	40.4	42.144	3222	3.47533	13144	0.561764	1698262	54.5447	131574	1.12851	22731	0.700632	13248	0.338904	150700	39.1139	12162	0.136272
574	A	5	5	132	40.42	42.164	2978	3.29736	16634	0.729782	1665459	54.9101	123212	1.08482	22347	0.707067	14573	0.382689	145448	38.7521	11834	0.136114
574	A	5	5	134	40.44	42.184	3252	3.92933	16389	0.78465	1423284	51.2078	129181	1.24117	22744	0.785299	13541	0.388038	142867	41.5381	10006	0.125591
574	A	5	5	136	40.46	42.204	3099	3.98142	13051	0.664379	1333945	51.0307	124065	1.26745	21943	0.805588	12531	0.381819	135019	41.7405	9602	0.128147
574	A	5	5	138	40.48	42.224	2611	3.2333	11628	0.570558	1509264	55.6521	104743	1.0314	19238	0.680769	10948	0.321536	128869	38.4003	8554	0.110037
574	A	5	5	140	40.5	42.244	1889	2.36034	10405	0.515157	1706147	63.4798	88758	0.881888	15392	0.549588	12662	0.375232	105599	31.7503	6757	0.0877053
574	A	5	5	142	40.52	42.264	2447	2.54088	11664	0.479902	2172174	67.1617	88190	0.728171	15677	0.465172	17769	0.437591	112481	28.1045	7616	0.0821498
574	A	5	6	2	40.62	42.364	1362	2.08906	7415	0.450651	1426753	65.1627	62247	0.759199	13521	0.592628	12069	0.439036	82453	30.4317	4709	0.0750294
574	A	5	6	4	40.64	42.384	1714	1.92396	9367	0.41662	1967930	65.7765	76629	0.683977	15490	0.496863	16678	0.444001	111752	30.1847	6294	0.0733907
574	A	5	6	6	40.66	42.404	2232	2.56055	9096	0.413471	1821936	62.2371	78174	0.713125	15259	0.500225	15715	0.427572	119819	33.0759	6050	0.0720982
574	A	5	6	8	40.68	42.424	1936	2.03674	8732	0.363999	2242206	70.2399	75712	0.633374	14916	0.448419	18790	0.468828	101709	25.7476	5595	0.061145
574	A	5	6	10	40.7	42.444	1955	1.96538	8181	0.325883	2354533	70.4825	75133	0.600613	14103	0.405146	19101	0.455419	106249	25.7023	6010	0.0627631
574	A	5	6	12	40.72	42.464	1738	1.81153	8591	0.354809	2304349	71.5189	69880	0.579179	13186	0.392744	20018	0.494848	98845	24.7912	5249	0.0568332
574	A	5	6	14	40.74	42.484	2518	2.58933	11795	0.480601	2186797	66.9601	85745	0.701138	16971	0.498699	19190	0.468017	114111	28.2361	6174	0.0659519
574	A	5	6	16	40.76	42.504	2226	2.31405	11239	0.462947	2191788	67.8458	84441	0.698016	16960	0.503818	19715	0.486072	110398	27.6157	6813	0.0735726
574	A	5	6	18	40.78	42.524	2695	2.7722	12688	0.517147	1989156	60.9271	103133	0.843581	20405	0.599794	18020	0.439618	136584	33.8074	8716	0.0931348
574	A	5	6	20	40.8	42.544	3073	3.07425	14767	0.585362	2142717	63.829	109664	0.872378	20747	0.593106	17957	0.426055	126810	30.5265	8983	0.0933529
574	A	5	6	22	40.82	42.564	3072	3.41733	14248	0.628021	1784138	59.0977	106451	0.941627	20618	0.655408	15868	0.418642	129792	34.7424	8560	0.0989165
574	A	5	6	24	40.84	42.584	2161	2.24683	13393	0.551758	2184377	67.6269	92100	0.761445	17167	0.510047	18599	0.458628	110986	27.7671	7159	0.077321
574	A	5	6	26	40.86	42.604	2795	2.78847	11604	0.45872	2224896	66.0954	99101	0.786188	18418	0.525082	19582	0.463337	119964	28.7993	8059	0.0835209
574	A	5	6	28	40.88	42.624	1988	1.89114	8742	0.329513	2601694	73.6953	79195	0.599058	14355	0.390221	22106	0.498738	98468	22.5397	5693	0.0562572
574	A	5	6	30	40.9	42.644	2013	2.00519	10919	0.430973	2386965	70.8002	90060	0.713358	16879	0.480462	20278	0.479063	104382	25.0198	6854	0.0709228
574	A	5	6	32	40.92	42.664	2444	2.3797	8944	0.345071	2467992	71.5553	83768	0.648579	15834	0.440567	22605	0.522013	102639	24.0481	6005	0.0607385
574	A	5	6	34	40.94	42.684	1740	1.70227	9298	0.360434	2500798	72.851	77721	0.60462	14891	0.416298	22820	0.529482	99740	23.4799	5505	0.0559458
574	A	5	6	36	40.96	42.704	2224	2.17846	9063	0.351757	2451265	71.4962	88103	0.686231	16001	0.447882	23496	0.54584	102779	24.2252	6730	0.0684795
574	A	5	6	38	40.98	42.724	1993	1.89771	8485	0.320133	2641700	74.9003	75394	0.570853	13998	0.380881	24618	0.555945	93051	21.3202	5454	0.0539471
574	A	5	6	40	41	42.744	1948	2.01963	9657	0.396717	2314008	71.4372	81808	0.674439	14743	0.436786	23552	0.579117	97747	24.3856	6546	0.0704999
574	A	5	6	42	41.02	42.764	2228	2.21021	9246	0.363436	2429853	71.7754	84712	0.668233	15318	0.434232	24673	0.580492	100133	23.9025	6355	0.0654884
574	A	5	6	44	41.04	42.784	2678	2.72958	10894	0.439974	2201744	66.8234	97973	0.794063	19442	0.566273	28406	0.686674	113669	27.8788	7680	0.0813159
574	A	5	6	46	41.06	42.804	2861	3.03755	11711	0.492669	2024633	64.0072	101908	0.860355	20583	0.624474	27060	0.681379	118252	30.2107	7769	0.0856841
574	A	5	6	48	41.08	42.824	3100	3.42783	14075	0.616683	1816916	59.8232	117053	1.02921	23202	0.733135	22243	0.58332	126569	33.6769	9554	0.109742
574	A	5	6	50	41.1	42.844	3210	3.44414	16090	0.684049	1875150	59.9086	120992	1.03228	23800	0.729715	21594	0.549496	129942	33.5484	9270	0.10332
574	A	5	6	52	41.12	42.864	3752	4.20636	18220	0.809371	1682110	56.1533	138708	1.23654	24757	0.793126	19704	0.523907	134002	36.1494	10989	0.127977
574	A	5	6	54	41.14	42.884	3377	3.81705	14894	0.667058	1713809	57.6815	127399	1.14506	23984	0.774674	19847	0.532044	129631	35.2576	10650	0.125048
574	A	5	6	56	41.16	42.904	3750	4.28155	18151	0.821156	1586266	53.929	144401	1.311	28235	0.921209	17407	0.471356	138775	38.1266	11646	0.138126
574	A	5	6	58	41.18	42.924	3500	3.70851	16166	0.678718	1848890	58.3336	128434	1.08212	23965	0.725619	16777	0.4216	136993	34.9282	11049	0.121614
574	A	5	6	60	41.2	42.944	4291	5.04774	19247	0.897133	1334054	46.7292	172645	1.61494	30650	1.03031	15149	0.422647	155709	44.0757	14920	0.182321
574	A	5	6	62	41.22	42.964	3667	4.31493	16141	0.752573	1455859	51.0104	150880	1.41175	28702	0.965106	15590	0.435075	144685	40.9669	11722	0.143283
574	A	5	6	64	41.24	42.984	2407	2.8605	16350	0.769908	1811026	64.0866	109381	1.03365	19398	0.658754	16167	0.45567	105035	30.0363	7991	0.0986499
574	A	5	6	66	41.26	43.004	1782	1.67289	7195	0.267637	2704786	75.6085	67380	0.502986	10625	0.28503	23316	0.519123	93357	21.0889	5637	0.0549716
574	A	5	6	68	41.28	43.024	2494	2.40917	9092	0.348005	2547553	73.2775	75774	0.582042	14983	0.41359	28188	0.645788	95779	22.2632	6054	0.0607495
574	A	5	6	70	41.3	43.044	1180	1.1578	6765	0.263011	2697060	78.7986	58142	0.453633	9612	0.269504	30140	0.701374	77505	18.299	5603	0.0571086
574	A	5	6	72	41.32	43.064	1167	1.20249	5981	0.244197	2601357	79.8157	52298	0.428509	9098	0.267891	31933	0.780381	69451	17.2201	3805	0.0407283
574	A	5	6	74	41.34	43.084	932	0.946385	5528	0.222421	2710147	81.9448	48348	0.390386	7485	0.217192	30624	0.737513	63437	15.5003	3881	0.0409379
574	A	5	6	76	41.36	43.104	557	0.56399	5045	0.20241	2766658	83.4159	42932	0.34567	6118	0.177022	33103	0.794949	59374	14.4664	3207	0.0337322
574	A	5	6	78	41.38	43.124	1074	1.06656	4213	0.165778	2831014	83.7143	41077	0.324372	6148	0.174468	43253	1.01871	56520	13.5061	2882	0.0297307
574	A	5	6	80	41.4	43.144	1034	1.05724	4600	0.186366	2728002	83.0569	42631	0.346612	6081	0.177676	37267	0.903721	57863	14.2365	3297	0.0350189
574	A	5	6	82	41.42	43.164	597	0.645876	5185	0.222269	2546637	82.0387	44786	0.385284	7387	0.228372	34138	0.875928	59796	15.5666	3289	0.0369631
574	A	5	6	84	41.44	43.184	1300	1.3309	8058	0.326878	2455723	74.8615	70747	0.575936	12840	0.375637	72281	1.75502	84093	20.7161	5449	0.0579494
574	A	5	6	86	41.46	43.204	1352	1.29519	9645	0.366112	2703012	77.1047	64868	0.494141	10348	0.283278	42611	0.96813	84287	19.4296	5915	0.0588628
574	A	5	6	88	41.48	43.224	1742	1.63195	11347	0.421206	2711781	75.6466	70606	0.525973	13234	0.354282	56759	1.2611	89098	20.085	7590	0.0738634
574	A	5	6	90	41.5	43.244	2236	2.22402	13534	0.533394	2369784	70.1863	92076	0.728244	15646	0.444703	19790	0.46684	105784	25.3182	9512	0.0982807
574	A	5	6	92	41.52	43.264	2337	2.35741	14117	0.564255	2300290	69.0934	90793	0.728272	16204	0.467089	17642	0.422066	108290	26.2853	7847	0.0822263
574	A	5	6	94	41.54	43.284	2389	2.56789	15241	0.649125	2113315	67.6396	93611	0.800112	17308	0.531627	17596	0.448569	105447	27.2735	8028	0.089639
574	A	5	6	96	41.56	43.304	2333	2.49887	14046	0.596125	2116000	67.4872	91055	0.775527	17082	0.522839	18680	0.474528	106924	27.5582	7788	0.0866533
574	A	5	6	98	41.58	43.324	1365	1.36389	10945	0.433328	2504223	74.5067	71494	0.56804	11645	0.332495	19061	0.451697	92671	22.2811	6049	0.0627854
574	A	5	6	100	41.6	43.344	729	0.681303	6890	0.255145	2980096	82.9315	45231	0.336134	4647	0.124104	19858	0.440153	67523	15.1849	4816	0.0467551
574	A	5	6	102	41.62	43.364	823	0.772379	5151	0.191548	2926336	81.7771	46315	0.345634	5448	0.146106	20620	0.45896	72008	16.2614	4809	0.046883
574	A	5	6	104	41.64	43.384	886	0.821517	5222	0.191856	2942349	81.237	46639	0.343871	6448	0.170847	21876	0.481068	74883	16.7075	4807	0.0463006
574	A	5	6	106	41.66	43.404	965	0.878696	6088	0.219655	2975036	80.6642	50313	0.364297	6497	0.169054	23074	0.498299	78256	17.1465	6273	0.0593358
574	A	5	6	108	41.68	43.424	1619	1.52968	7086	0.265283	2752914	77.4501	68234	0.512646	10787	0.291242	25017	0.560588	84966	19.3172	7460	0.0732186
574	A	5	6	110	41.7	43.444	1394	1.32579	6805	0.256445	2724384	77.1537	64423	0.48721	9867	0.268162	25298	0.570628	86787	19.8615	7752	0.076587
574	A	5	6	112	41.72	43.464	1474	1.44877	7305	0.284497	2626104	76.8584	63141	0.49349	11270	0.316539	24164	0.563284	84489	19.9825	5142	0.0525006
574	A	5	6	114	41.74	43.484	1449	1.38582	6719	0.254624	2706796	77.0854	64680	0.491896	10738	0.29347	25778	0.584715	86275	19.8551	4933	0.0490095
574	A	5	6	116	41.76	43.504	1584	1.6013	6814	0.272944	2483216	74.7494	66076	0.531159	11781	0.340329	35153	0.842819	88839	21.6106	4897	0.0514252
574	A	5	6	118	41.78	43.524	1489	1.61219	6779	0.290833	2298135	74.0926	57470	0.494798	11244	0.347891	32689	0.839421	85475	22.2694	4703	0.0528965
574	A	5	6	120	41.8	43.544	1263	1.40925	7054	0.311871	2215644	73.614	63495	0.563361	10889	0.347194	52171	1.3806	83105	22.313	5241	0.0607474
574	A	5	6	122	41.82	43.564	2007	2.03951	8389	0.337788	2349943	71.1071	72680	0.587297	13494	0.39185	69461	1.67408	97283	23.7883	7017	0.0740731
574	A	5	6	124	41.84	43.584	1600	1.71758	8512	0.362062	2215524	70.819	74699	0.637639	12897	0.395627	70401	1.79238	93633	24.1864	8007	0.0892886
574	A	5	6	128	41.88	43.624	2063	2.61257	10590	0.531398	1679230	63.3221	88070	0.88687	16674	0.603404	53627	1.61067	99426	30.2981	10258	0.134946
574	A	5	6	130	41.9	43.644	1447	2.02601	9214	0.511184	1573568	65.6049	67707	0.753826	12859	0.514495	20660	0.686056	88530	29.8271	5259	0.0764903
574	A	5	6	132	41.92	43.664	1497	2.04345	8751	0.47332	1649552	67.0478	71241	0.773278	12811	0.499718	16616	0.537927	86882	28.5376	6127	0.0868799
574	A	5	6	134	41.94	43.684	1930	2.92295	9996	0.599854	1369512	61.7599	83564	1.00635	15570	0.673834	14153	0.508356	88980	32.4267	6482	0.101977
574	A	5	6	136	41.96	43.704	2065	3.13927	9027	0.543761	1373322	62.1668	77990	0.942784	14293	0.620916	11836	0.426746	87643	32.0607	6269	0.0990005
574	A	5	6	138	41.98	43.724	2139	3.03597	9267	0.521173	1459929	61.7015	80617	0.909866	15542	0.630368	11327	0.381292	95800	32.7189	6845	0.100923
574	A	5	6	140	42	43.744	1887	2.79819	7130	0.418938	1500214	66.2422	75014	0.884527	14562	0.617058	11692	0.411196	79987	28.5411	5635	0.0868017
574	A	5	6	142	42.02	43.764	1860	2.94901	7694	0.483361	1327322	62.6638	76478	0.964193	13401	0.607157	11148	0.419195	83385	31.8125	6117	0.100747
574	A	5	7	4	42.14	43.884	2509	2.26694	6855	0.245415	2518897	67.7682	82740	0.594454	19738	0.509615	15342	0.328758	129857	28.2326	5763	0.05409
574	A	5	7	6	42.16	43.904	3109	2.90205	8544	0.31601	2332684	64.8362	95149	0.706241	21971	0.58605	15301	0.338735	134680	30.2506	6613	0.0641229
574	A	5	7	8	42.18	43.924	2801	2.56142	7664	0.277702	2372487	64.6023	83330	0.605945	20482	0.53523	14787	0.320703	141060	31.0397	5991	0.0569111
574	A	5	7	10	42.2	43.944	3633	3.40004	10497	0.38926	2126459	59.2588	108636	0.808457	25808	0.690198	16083	0.356978	155527	35.0245	7385	0.0717958
574	A	5	7	12	42.22	43.964	4549	4.59591	11217	0.449043	1643629	49.4466	124803	1.00264	28826	0.832225	14753	0.353502	177770	43.2176	9761	0.102442
574	A	5	7	14	42.24	43.984	3459	3.58542	9216	0.378519	1921618	59.3108	96285	0.793619	23806	0.705142	14053	0.345473	139536	34.8035	7208	0.0776129
							3634
