# Supplementary material for: Variations in the Biological Pump through the Miocene: Evidence from organic carbon burial in Pacific Ocean sediments
Source: Copernicus journal article supplement (doi:10.5194/cp-2024-34), 2024-05-27
Supplement: Supplementary file 33 [file SuppTable_S6 U574X XRF data.xlsx]

## Sheet: SuppTable S6 U574X XRF data
Site	Hole	Core	Section	Interval (cm)	Depth (m CSF)	Depth (m CCSF)	Al_Area	Al2O3_NMS%	50kvBa_Area	BaSO4_NMS%	Ca_Area	CaCO3_NMS%	Fe_Area	Fe2O3_NMS%	K_Area	K2O_NMS%	Mn_Area	MnO_NMS%	Si_Area	SiO2_NMS%	Ti_Area	TiO2_NMS%
574	X	1	1	6	0.06	0.06	1942	2.40381	5561	0.261373	2035720	73.0219	59247	0.545163	12984	0.441569	30996	0.450096	70796	22.8198	4857	0.0563272
574	X	1	1	8	0.08	0.08	1806	2.51332	5023	0.26543	1754480	70.756	60841	0.629413	12895	0.493049	30273	0.494236	68374	24.7784	5379	0.0701343
574	X	1	1	10	0.1	0.1	1394	1.84148	4277	0.214536	2022570	77.4265	45601	0.447803	10056	0.364979	24526	0.380083	56013	19.2683	4545	0.0562518
574	X	1	1	12	0.12	0.12	1035	1.34579	4620	0.228105	2162170	81.4719	41130	0.39756	8578	0.30645	14774	0.225362	47204	15.9833	3413	0.0415786
574	X	1	1	14	0.14	0.14	1393	1.6595	5463	0.247123	2302860	79.5018	47998	0.425067	9458	0.309573	24644	0.344417	56315	17.4703	3779	0.0421794
574	X	1	1	16	0.16	0.16	1536	1.57061	5638	0.218907	2749730	81.4799	51327	0.39015	9524	0.267568	13748	0.164917	59589	15.867	4272	0.0409267
574	X	1	1	18	0.18	0.18	1092	1.16893	5293	0.215141	2727060	84.5943	43365	0.345074	7189	0.211432	15141	0.190137	47437	13.2231	5178	0.0519307
574	X	1	1	20	0.2	0.2	1175	1.14203	5133	0.189438	2984620	84.0642	44641	0.322539	8447	0.22557	12489	0.142402	54815	13.8736	4418	0.0402312
574	X	1	1	22	0.22	0.22	602	0.793296	3547	0.177483	2239100	85.5058	31748	0.311002	6880	0.249095	7249	0.112064	37351	12.8172	2758	0.0340511
574	X	1	1	24	0.24	0.24	842	1.01936	3876	0.178178	2435640	85.4499	37092	0.333813	7420	0.246807	5875	0.0834392	40126	12.65	3394	0.0384968
574	X	1	1	26	0.26	0.26	819	0.919528	4311	0.183787	2633720	85.6907	38493	0.321271	7459	0.230091	2976	0.0391978	43032	12.5813	3244	0.034124
574	X	1	1	28	0.28	0.28	1102	1.20556	4154	0.172556	2697150	85.5055	38492	0.31303	6085	0.182897	7623	0.0978319	43805	12.4791	4249	0.0435503
574	X	1	1	30	0.3	0.3	701	0.846401	3970	0.182014	2447850	85.6498	35765	0.321015	5675	0.188262	7842	0.111079	40272	12.6623	3459	0.0391297
574	X	1	1	32	0.32	0.32	793	0.898305	3554	0.152871	2638240	86.606	30803	0.259389	5941	0.184905	6742	0.0895957	39914	11.7741	3284	0.0348539
574	X	1	1	34	0.34	0.34	390	0.412532	2956	0.118728	2931500	89.8598	28770	0.226225	3858	0.112123	5779	0.0717122	33292	9.17031	2883	0.0285717
574	X	1	1	36	0.36	0.36	472	0.47703	3361	0.128982	3056940	89.531	31213	0.234503	3830	0.106351	10516	0.124682	35625	9.37584	2283	0.0216176
574	X	1	1	38	0.38	0.38	506	0.601958	3076	0.13895	2598760	89.5913	27363	0.241985	3572	0.116752	4654	0.0649516	29749	9.21594	2525	0.0281433
574	X	1	1	40	0.4	0.4	390	0.488995	2725	0.129737	2477750	90.0285	24342	0.226885	3000	0.103347	4086	0.0601016	27368	8.93582	2266	0.0266194
574	X	1	1	42	0.42	0.42	596	0.687721	3073	0.134644	2648820	88.5729	31464	0.269891	5293	0.167806	5342	0.0723132	33502	10.0667	2586	0.0279571
574	X	1	1	44	0.44	0.44	601	0.629049	3261	0.129604	2931180	88.9069	32555	0.253301	4769	0.137144	4186	0.0513993	36207	9.86856	2451	0.0240354
574	X	1	1	46	0.46	0.46	803	0.865858	3720	0.152311	2831240	88.4688	32049	0.256894	4710	0.139537	7318	0.0925702	35599	9.99586	2785	0.0281355
574	X	1	1	48	0.48	0.48	690	0.715918	3795	0.149514	2962120	89.0636	34834	0.268674	4607	0.131332	6281	0.0764523	35338	9.54789	4794	0.0466026
574	X	1	1	50	0.5	0.5	320	0.346405	3462	0.142304	2852940	89.4973	32088	0.258218	3829	0.113883	5506	0.0699228	33806	9.52971	4169	0.0422829
574	X	1	1	52	0.52	0.52	491	0.554599	3686	0.158092	2709400	88.6856	35288	0.296301	4395	0.136394	9318	0.123472	34005	10.0021	4104	0.0434313
574	X	1	1	54	0.54	0.54	669	0.709165	3569	0.143656	2870960	88.1924	34300	0.270286	4331	0.126138	6830	0.0849355	37774	10.4271	4664	0.046321
574	X	1	1	56	0.56	0.56	556	0.646857	3933	0.173746	2611940	88.0601	35836	0.309928	4750	0.151833	7544	0.102963	34667	10.5027	4756	0.051841
574	X	1	1	58	0.58	0.58	595	0.698719	3772	0.168195	2577390	87.7099	35864	0.313078	4018	0.129638	7601	0.104714	35389	10.8219	4888	0.0537793
574	X	1	1	60	0.6	0.6	612	0.643384	4139	0.165223	2850150	86.8299	41029	0.320641	5213	0.150572	8651	0.106692	42836	11.7268	5766	0.0567926
574	X	1	1	62	0.62	0.62	415	0.492633	3236	0.145861	2552430	87.8037	34112	0.301017	4757	0.155148	8192	0.114081	35351	10.9277	5385	0.0598907
574	X	1	1	64	0.64	0.64	680	0.756424	3322	0.140318	2731270	88.0448	34738	0.287257	4162	0.127203	8444	0.110193	36161	10.4749	5656	0.0589473
574	X	1	1	66	0.66	0.66	807	0.929497	4143	0.181195	2552830	85.2077	47224	0.404339	7342	0.232342	15023	0.202992	42572	12.7688	6773	0.0730893
574	X	1	1	68	0.68	0.68	1316	1.49262	4780	0.205863	2513610	82.6178	59126	0.498517	10997	0.342693	15725	0.209234	49315	14.5654	6380	0.0677972
574	X	1	1	70	0.7	0.7	1610	1.88206	4847	0.215148	2369230	80.2598	63336	0.550385	12297	0.394953	20526	0.281488	53731	16.3563	5468	0.0598872
574	X	1	1	72	0.72	0.72	584	0.681842	3416	0.151442	2553810	86.4057	38586	0.334895	6745	0.216367	11369	0.155719	39527	12.0175	3334	0.0364699
574	X	1	1	74	0.74	0.74	3238	4.01409	7104	0.334403	1829130	65.711	112385	1.03568	24849	0.846365	54943	0.799044	84126	27.1576	8760	0.101745
574	X	1	1	76	0.76	0.76	3425	4.36993	7819	0.37881	1707580	63.1359	125383	1.18922	26505	0.929137	56743	0.849324	87353	29.023	10429	0.124668
574	X	1	1	78	0.78	0.78	4048	5.16077	8306	0.402089	1571480	58.0583	143818	1.363	30988	1.08544	69289	1.0363	98680	32.7608	11161	0.133314
574	X	1	1	80	0.8	0.8	4406	5.79501	8888	0.443885	1418000	54.0465	156554	1.53067	34171	1.23483	64708	0.998425	104559	35.8115	11291	0.139136
574	X	1	1	82	0.82	0.82	4619	6.12153	9531	0.479631	1379260	52.9712	161368	1.58978	35438	1.29039	61155	0.950806	105593	36.4417	12480	0.154962
574	X	1	1	84	0.84	0.84	1648	1.85305	5535	0.236322	2330160	75.9274	82369	0.688497	15462	0.477676	16231	0.214103	70143	20.5383	6136	0.0646417
574	X	1	1	86	0.86	0.86	5451	7.69987	10194	0.546775	1013460	41.4857	202750	2.12901	42189	1.63736	24991	0.414132	124764	45.8932	14658	0.19399
574	X	1	1	88	0.88	0.88	5167	7.26192	10034	0.535481	1123090	45.7414	186617	1.94972	38140	1.47276	31584	0.520748	115681	42.3376	13693	0.180306
574	X	1	1	90	0.9	0.9	4836	6.89554	9894	0.535687	1131500	46.7542	180562	1.91389	37360	1.46362	32875	0.549915	112319	41.7049	13644	0.182273
574	X	1	1	92	0.92	0.92	5466	7.7751	10123	0.546767	1073230	44.2397	182777	1.93271	38526	1.50567	28617	0.477538	117013	43.3433	13450	0.179249
574	X	1	1	94	0.94	0.94	4023	6.0093	8972	0.508885	1175670	50.8912	154834	1.71929	31763	1.30357	30466	0.533872	99947	38.8772	11197	0.156702
574	X	1	1	96	0.96	0.96	4343	6.65029	8725	0.507309	1060300	47.0503	166583	1.89622	34623	1.45664	34645	0.622356	104416	41.636	12607	0.180867
574	X	1	1	98	0.98	0.98	4748	7.3352	8807	0.516638	985951	44.1407	174144	1.99995	35651	1.51325	36563	0.66266	108475	43.6398	13250	0.191785
574	X	1	1	100	1	1	5018	8.23104	10279	0.640224	797929	37.929	189030	2.30496	38902	1.75321	39095	0.752304	112769	48.1687	14348	0.220503
574	X	1	1	102	1.02	1.02	5522	8.90124	10633	0.650829	712544	33.285	215631	2.58389	43381	1.92129	36354	0.68747	123232	51.7284	16016	0.241884
574	X	1	1	104	1.04	1.04	5304	7.58595	9818	0.533196	1024810	42.475	189331	2.01297	39243	1.54208	38919	0.653004	120840	45.0058	14328	0.191995
574	X	1	1	106	1.06	1.06	5319	7.59015	9983	0.540927	1055150	43.6333	187830	1.99248	39685	1.55591	39926	0.668381	117937	43.825	14496	0.193806
574	X	1	1	108	1.08	1.08	4539	6.80258	10242	0.582848	1036990	45.037	165042	1.83872	35530	1.46301	38176	0.6712	111290	43.4331	12217	0.171544
574	X	1	1	110	1.1	1.1	3951	5.44661	8594	0.449853	1358420	54.2669	132491	1.35773	28412	1.07612	37413	0.605047	102146	36.6684	10016	0.129363
574	X	1	1	112	1.12	1.12	2206	3.09357	6486	0.345373	1660990	67.5	83154	0.866855	18200	0.701236	33967	0.558804	73497	26.8396	7199	0.0945855
574	X	1	1	114	1.14	1.14	4488	7.12963	7992	0.482088	983799	45.2901	155526	1.83665	32703	1.42738	23783	0.443229	104489	43.2251	11140	0.165805
574	X	1	1	116	1.16	1.16	1280	1.47518	4511	0.197407	2409200	80.462	51297	0.439475	11810	0.373958	14392	0.194582	56006	16.8082	4563	0.04927
574	X	1	1	118	1.18	1.18	1608	1.97682	5162	0.240967	2121620	75.5845	59622	0.544875	14009	0.473181	25401	0.366337	64834	20.7556	5007	0.057671
574	X	1	1	120	1.2	1.2	997	1.14472	4747	0.206957	2455830	81.7119	52476	0.447892	11341	0.357762	12743	0.171642	53217	15.9113	4445	0.0478161
574	X	1	1	126	1.26	1.26	2022	2.36472	5403	0.239934	2234400	75.7255	73132	0.635793	15632	0.502287	20871	0.286346	66224	20.1682	7048	0.077226
574	X	1	1	128	1.28	1.28	1925	1.9365	5342	0.204055	2732280	79.6516	63668	0.476121	14767	0.408148	17634	0.208107	65140	17.0642	5437	0.0512442
574	X	1	1	130	1.3	1.3	1695	1.78737	4905	0.1964	2636750	80.5742	58569	0.459115	12255	0.355056	21501	0.265981	59404	16.3122	5027	0.0496651
574	X	1	1	132	1.32	1.32	1704	1.91822	4857	0.207613	2449710	79.9149	59369	0.496819	13452	0.416059	23658	0.312432	56888	16.6764	5462	0.0576075
574	X	1	1	134	1.34	1.34	1958	2.13442	5607	0.232089	2425600	76.6248	66600	0.539697	15384	0.46076	23116	0.295616	69229	19.652	5930	0.0605648
574	X	1	1	136	1.36	1.36	1779	2.27634	4138	0.201052	2085910	77.3462	57619	0.54807	13793	0.484907	25678	0.385452	56132	18.7035	4542	0.0544511
574	X	1	1	138	1.38	1.38	1400	1.83876	4114	0.205172	2088300	79.4828	49104	0.479427	11325	0.40867	15856	0.244308	50558	17.2917	3997	0.0491846
574	X	1	1	140	1.4	1.4	1518	2.53685	3783	0.240058	1491640	72.2388	55609	0.690838	12991	0.596491	24889	0.487953	53168	23.1379	4541	0.0711004
574	X	1	1	142	1.42	1.42	1650	2.25847	5588	0.290432	1873280	74.3047	69135	0.703457	15019	0.56482	18798	0.301849	60261	21.4792	7565	0.0970148
574	X	1	2	4	1.54	1.54	1113	2.1254	3165	0.229496	1312670	72.6415	54045	0.767202	12138	0.636841	17874	0.400419	46512	23.1293	3906	0.0698837
574	X	1	2	6	1.56	1.56	4340	5.85084	10356	0.530124	1313500	51.3148	153660	1.53992	34068	1.26187	60496	0.95676	109349	38.3879	12490	0.157757
574	X	1	2	8	1.58	1.58	3913	5.97656	8810	0.510945	1144800	50.6706	143289	1.62691	31999	1.34282	53415	0.95709	97443	38.7564	11091	0.158712
574	X	1	2	10	1.6	1.6	4183	7.21679	8887	0.582195	814161	40.7052	178438	2.28851	35771	1.69561	63577	1.28678	102403	46.0066	13507	0.21833
574	X	1	2	12	1.62	1.62	3446	5.58186	7999	0.49199	1109770	52.0932	148886	1.79278	30630	1.36317	37912	0.720424	89583	37.7868	11183	0.169715
574	X	1	2	14	1.64	1.64	4977	10.4059	9272	0.736107	346615	21.001	225787	3.50928	42714	2.45369	15028	0.368604	112430	61.2131	15944	0.312325
574	X	1	2	16	1.66	1.66	4782	11.5578	8554	0.785038	205399	14.3862	222410	3.99602	41463	2.75336	17967	0.509434	104285	65.6353	16642	0.37685
574	X	1	2	18	1.68	1.68	5034	11.5456	8764	0.763245	196915	13.0878	222002	3.78504	42875	2.70176	29715	0.799518	112115	66.9607	16582	0.35632
574	X	1	2	20	1.7	1.7	5438	11.524	8796	0.707794	324328	19.9174	212877	3.35353	42301	2.46294	34190	0.849986	110298	60.8673	15967	0.31702
574	X	1	2	22	1.72	1.72	4703	9.3708	6727	0.508956	544977	31.4675	179685	2.66147	36893	2.01969	3204	0.0748931	103434	53.6681	12241	0.228516
574	X	1	2	24	1.74	1.74	5081	10.2864	9107	0.700077	415219	24.3598	215822	3.24802	42372	2.35685	39406	0.935888	109652	57.8072	16122	0.305795
574	X	1	2	26	1.76	1.76	4928	9.41829	9687	0.702987	579227	32.0799	196598	2.79312	40552	2.12937	38713	0.867972	103981	51.7496	14454	0.258814
574	X	1	2	28	1.78	1.78	4502	8.96306	8234	0.62247	560455	32.3351	179010	2.64934	35937	1.96576	36221	0.845978	101013	52.3696	13328	0.248607
574	X	1	2	30	1.8	1.8	4766	9.54137	8518	0.647517	483799	28.0676	215238	3.2032	41753	2.29659	22157	0.520374	106355	55.4455	14817	0.277917
574	X	1	2	34	1.84	1.84	4349	7.03759	9581	0.588711	963478	45.1814	178856	2.15153	36652	1.62956	42203	0.801172	100652	42.4139	12938	0.196155
574	X	1	2	36	1.86	1.86	3619	4.73435	8354	0.414976	1537050	58.2697	141863	1.37959	29704	1.06764	45089	0.691974	97771	33.3068	11010	0.134945
574	X	1	2	38	1.88	1.88	3480	6.10297	9055	0.602986	999706	50.8062	150687	1.96447	29261	1.4099	35210	0.724395	83657	38.2046	11225	0.184436
574	X	1	2	40	1.9	1.9	3549	5.12704	8274	0.453871	1303330	54.563	146914	1.57773	30532	1.21187	33245	0.563423	96630	36.3516	11188	0.15143
574	X	1	2	42	1.92	1.92	4201	6.86177	7834	0.485874	978550	46.318	177834	2.15927	34504	1.54843	11293	0.216392	99271	42.2238	12189	0.18653
574	X	1	2	44	1.94	1.94	1509	1.88638	5132	0.243604	2121660	76.8597	76244	0.708525	14731	0.505955	25282	0.370766	59424	19.3444	6891	0.0807089
574	X	1	2	46	1.96	1.96	1818	2.24395	6372	0.298642	2057160	73.5818	87427	0.802182	17101	0.579934	27174	0.393478	68473	22.0084	7921	0.0916003
574	X	1	2	48	1.98	1.98	1190	1.35591	3948	0.170812	2453380	81.0088	57670	0.488475	10919	0.341826	24251	0.324161	54733	16.2399	6565	0.0700836
574	X	1	2	50	2	2	2212	2.85452	6098	0.298807	1879290	70.2789	87240	0.836896	17537	0.621786	61367	0.92903	71679	24.0874	7661	0.0926256
574	X	1	2	52	2.02	2.02	2177	2.67935	6385	0.298393	2004320	71.4858	90596	0.828874	19160	0.647895	37655	0.543677	73090	23.425	7891	0.0909915
574	X	1	2	54	2.04	2.04	3539	4.59611	7758	0.382575	1550860	58.3668	133406	1.28794	27776	0.991102	44510	0.678134	99209	33.5516	11984	0.145818
574	X	1	2	56	2.06	2.06	3290	4.61749	7037	0.37502	1413250	57.4795	129076	1.34668	27575	1.06332	40011	0.658775	93931	34.3297	9849	0.129509
574	X	1	2	58	2.08	2.08	4736	8.27359	9846	0.653129	635739	32.1843	203469	2.64234	39890	1.91463	31909	0.653948	117371	53.3943	17338	0.283779
574	X	1	2	60	2.1	2.1	3426	5.29951	7052	0.414207	1189100	53.3028	163285	1.8776	28887	1.22769	8295	0.150526	93200	37.5419	12821	0.18581
574	X	1	2	62	2.12	2.12	3572	5.31869	7288	0.412058	1180030	50.9178	167669	1.8559	31050	1.27026	5347	0.0934009	103037	39.9519	12898	0.179934
574	X	1	2	64	2.14	2.14	5341	9.69136	8489	0.584892	531359	27.9404	231178	3.1183	44599	2.22344	2907	0.0618806	118716	56.0948	16758	0.284893
574	X	1	2	66	2.16	2.16	4727	8.56995	8505	0.585496	608362	31.9623	221005	2.97854	41209	2.05269	3199	0.0680385	113322	53.5006	16626	0.282409
574	X	1	2	68	2.18	2.18	5806	9.96348	9703	0.632262	456729	22.7131	267283	3.40968	51754	2.44015	7130	0.143539	135086	60.3665	20610	0.331368
574	X	1	2	70	2.2	2.2	5544	8.97841	10058	0.618507	643771	30.2128	247013	2.97375	47325	2.10574	9584	0.182084	129527	54.6246	20047	0.304175
574	X	1	2	72	2.22	2.22	5042	7.98467	9665	0.581183	860890	39.508	204758	2.41048	40622	1.76748	10826	0.201127	114736	47.3157	15594	0.231372
574	X	1	2	74	2.24	2.24	5160	9.28453	9206	0.628982	564391	29.4288	257278	3.44129	44897	2.21956	4324	0.0912733	116576	54.6224	16794	0.283115
574	X	1	2	76	2.26	2.26	4972	9.1908	9411	0.660564	574723	30.7867	210795	2.89662	42686	2.16793	2954	0.064059	112113	53.9671	15368	0.266157
574	X	1	2	80	2.3	2.3	3114	4.64496	8818	0.499448	1295340	55.9925	145250	1.6106	29684	1.21653	13859	0.242518	91670	35.6076	13297	0.18583
574	X	1	2	82	2.32	2.32	4245	6.98246	9865	0.616148	838605	39.9734	199282	2.43673	38942	1.7599	16688	0.32202	111243	47.6491	16884	0.260198
574	X	1	2	84	2.34	2.34	4485	7.25605	12092	0.742836	830312	38.928	202726	2.43813	41647	1.85123	27850	0.52858	113892	47.9825	17989	0.272674
574	X	1	2	86	2.36	2.36	4573	7.24549	9883	0.594583	881588	40.4777	202617	2.38644	40980	1.78393	25678	0.477283	113452	46.8091	15191	0.225502
574	X	1	2	88	2.38	2.38	4366	7.19749	10383	0.649946	849969	40.6054	196098	2.40314	39882	1.8064	27650	0.534737	108469	46.5645	15439	0.23846
574	X	1	2	90	2.4	2.4	4726	8.01521	11369	0.73215	737560	36.2495	205406	2.58966	40234	1.87479	33687	0.670242	112300	49.5967	17107	0.271827
574	X	1	2	92	2.42	2.42	4405	7.15712	11402	0.703445	852570	40.1426	203825	2.46183	39988	1.78509	30242	0.576436	110881	46.9139	17053	0.259592
574	X	1	2	94	2.44	2.44	3557	4.90043	8491	0.444187	1395410	55.7104	158207	1.62026	32506	1.23042	25386	0.410292	98980	35.5099	13491	0.174138
574	X	1	2	96	2.46	2.46	4186	6.93436	10571	0.664937	918810	44.1079	187052	2.30345	34706	1.57961	29437	0.572069	101074	43.6012	15239	0.236517
574	X	1	2	98	2.48	2.48	2725	3.67269	7213	0.36914	1604170	62.6545	129311	1.29557	27815	1.03	22390	0.354014	86894	30.4972	10052	0.126931
574	X	1	2	100	2.5	2.5	3044	4.43403	6068	0.335627	1461960	61.7126	110330	1.19469	24858	0.994853	24438	0.417607	81170	30.7894	8882	0.121217
574	X	1	2	102	2.52	2.52	2563	2.92661	5822	0.252432	2168990	71.7723	103182	0.875848	23574	0.739584	17561	0.235241	77706	23.1059	8609	0.0921016
574	X	1	2	104	2.54	2.54	2801	3.49063	7066	0.334365	1851740	66.8734	131901	1.22193	27964	0.957477	19157	0.28007	82302	26.7087	11427	0.13342
574	X	1	2	106	2.56	2.56	2499	3.03957	7254	0.335027	1950000	68.7326	126407	1.14295	28025	0.936547	21385	0.305142	80132	25.3807	11186	0.127473
574	X	1	2	108	2.58	2.58	3542	4.59991	8196	0.404165	1595670	60.0519	161719	1.56124	34511	1.23139	28573	0.435315	93363	31.5738	11698	0.142335
574	X	1	2	110	2.6	2.6	3696	4.99081	8180	0.41942	1464840	57.3207	166890	1.67524	35708	1.32478	42451	0.672473	95098	33.4397	12407	0.156965
574	X	1	2	112	2.62	2.62	2229	2.64997	5846	0.263904	2087920	71.933	106473	0.940977	23946	0.782172	17126	0.238855	74647	23.1097	7307	0.0813895
574	X	1	2	114	2.64	2.64	3784	6.05388	10225	0.621159	1037890	48.1192	180246	2.14367	37749	1.65931	67795	1.27241	95845	39.9304	13342	0.199987
574	X	1	2	116	2.66	2.66	4394	7.26324	10025	0.629233	898213	43.0261	201587	2.47709	40819	1.85383	35066	0.679993	101858	43.8447	14581	0.225816
574	X	1	2	118	2.68	2.68	4096	6.37598	9496	0.561286	1032170	46.5607	193253	2.23626	40560	1.7347	23633	0.431572	103344	41.8913	14274	0.208176
574	X	1	2	120	2.7	2.7	4668	7.88037	10442	0.669354	778074	38.0644	223613	2.80622	44123	2.04653	28934	0.573023	108448	47.6748	18039	0.285316
574	X	1	2	122	2.72	2.72	4853	7.80564	9378	0.57275	850697	39.6512	221638	2.65003	45175	1.99634	24368	0.459797	111289	46.6125	16709	0.251795
574	X	1	2	124	2.74	2.74	4146	7.76345	7150	0.50838	755487	40.9954	185733	2.58537	37045	1.90587	17641	0.387522	93571	45.6266	12963	0.22742
574	X	1	2	126	2.76	2.76	4672	7.59206	7823	0.48271	867977	40.8741	201814	2.4379	42900	1.91537	13103	0.24979	109254	46.2323	14176	0.215828
574	X	1	2	128	2.78	2.78	5086	9.15297	9625	0.657723	640749	33.4162	227152	3.03886	44028	2.17697	22901	0.48349	108428	50.8134	15445	0.260418
574	X	1	2	130	2.8	2.8	4883	9.08776	9026	0.637855	622274	33.561	214855	2.97252	42579	2.17723	26447	0.577423	104662	50.7237	15059	0.262582
574	X	1	2	132	2.82	2.82	4405	7.78681	7501	0.503488	810323	41.5102	190771	2.50689	38514	1.87055	19077	0.395614	98206	45.2067	13270	0.219777
574	X	1	2	134	2.84	2.84	4290	8.59314	8017	0.609766	605744	35.1614	200927	2.99186	38835	2.13725	27934	0.65641	95089	49.5994	13364	0.250801
574	X	1	2	136	2.86	2.86	3702	7.00281	6848	0.491877	774873	42.4766	175239	2.4642	35726	1.85677	25274	0.560864	91215	44.9318	12137	0.215103
574	X	1	2	138	2.88	2.88	3783	7.98293	7554	0.605285	624520	38.1905	185204	2.90526	35975	2.08576	30198	0.74757	85946	47.2284	12865	0.254351
574	X	1	2	140	2.9	2.9	3591	7.79598	8720	0.718834	590729	37.1644	185449	2.99288	34058	2.03148	31256	0.796043	85336	48.2435	12629	0.256875
574	X	1	2	142	2.92	2.92	4162	8.77989	9035	0.723722	543361	33.2168	193449	3.03363	37559	2.1769	36247	0.89703	92672	50.9081	13351	0.263875
574	X	1	2	144	2.94	2.94	3731	8.14685	8053	0.667696	512055	32.4014	206544	3.35263	38218	2.29282	22944	0.587734	91940	52.2781	13331	0.272725
574	X	1	2	146	2.96	2.96	3403	5.80327	7772	0.503269	1063860	52.5746	149569	1.8961	29741	1.39349	28675	0.57367	83515	37.0874	10527	0.168195
574	X	1	2	148	2.98	2.98	2120	2.79381	4987	0.24955	1955090	74.6638	84342	0.826253	19464	0.704743	24236	0.374688	59191	20.3127	6034	0.0745013
574	X	1	3	6	3.06	3.06	1829	1.67615	4403	0.153216	3069060	81.5054	63905	0.435353	15112	0.380503	19047	0.204773	65356	15.5968	5568	0.0478074
574	X	1	3	8	3.08	3.08	1792	1.59172	4046	0.136462	3233410	83.2286	59924	0.395674	12872	0.314133	31648	0.329779	60309	13.9496	6488	0.053993
574	X	1	3	10	3.1	3.1	1493	1.38955	4220	0.149136	3084010	83.1788	59198	0.409572	12111	0.309694	27437	0.29957	58621	14.2075	6443	0.0561824
574	X	1	3	12	3.12	3.12	1537	1.46663	4523	0.163881	2960860	81.8741	65411	0.463987	14486	0.379781	35851	0.401324	61157	15.1965	6022	0.0538375
574	X	1	3	14	3.14	3.14	2480	2.39036	4886	0.178822	2796260	78.1039	71636	0.513277	17209	0.455728	45523	0.514743	70895	17.7942	5423	0.0489722
574	X	1	3	16	3.16	3.16	2444	2.59676	5499	0.221856	2424420	74.6485	78230	0.617892	18597	0.54289	51578	0.642899	74704	20.6693	6015	0.0598776
574	X	1	3	18	3.18	3.18	2625	3.18519	4998	0.230282	2050830	72.114	78266	0.705973	19226	0.640964	52594	0.74867	70597	22.3071	5963	0.0677906
574	X	1	3	20	3.2	3.2	2836	3.12366	5108	0.213632	2321320	74.0927	79917	0.654344	20875	0.631718	82361	1.06421	70293	20.1614	5653	0.0583358
574	X	1	3	22	3.22	3.22	3452	3.80482	7583	0.317366	2058830	65.7606	119645	0.980316	29756	0.901106	64690	0.836465	95120	27.3015	9473	0.0978247
574	X	1	3	24	3.24	3.24	3729	3.98899	7073	0.287297	2139440	66.3214	116945	0.929952	28477	0.836957	27762	0.348393	97628	27.1954	9133	0.0915339
574	X	1	3	26	3.26	3.26	4103	4.53805	8389	0.352318	1923730	61.6586	140699	1.15682	33576	1.02032	32351	0.419762	106743	30.7438	10640	0.110257
574	X	1	3	30	3.3	3.3	4421	5.04251	10429	0.451674	1799260	59.4707	161310	1.36772	33835	1.0603	34770	0.465241	107754	32.0045	12855	0.137371
574	X	1	3	32	3.32	3.32	5375	6.89465	9648	0.469924	1315870	48.9135	184522	1.7595	40559	1.42942	33145	0.498769	119378	39.8758	13183	0.158433
574	X	1	3	34	3.34	3.34	6505	8.79382	10629	0.545607	934848	36.623	233679	2.34833	48221	1.79104	44296	0.702494	139055	48.9518	19257	0.243903
574	X	1	3	36	3.36	3.36	5754	8.00417	11549	0.610025	894258	36.0489	236199	2.44249	46463	1.77579	48492	0.791342	138269	50.0867	18455	0.240524
574	X	1	3	38	3.38	3.38	5323	6.77246	9327	0.450598	1287360	47.4651	201283	1.90373	40969	1.43213	24766	0.369653	125042	41.4283	14927	0.177935
574	X	1	3	40	3.4	3.4	6471	9.43149	11759	0.650783	720812	30.4448	240783	2.60882	50106	2.00649	50955	0.871251	141605	53.7451	17665	0.241224
574	X	1	3	42	3.42	3.42	6208	10.5534	10640	0.686815	419920	20.6867	248211	3.13669	48995	2.2884	41449	0.826615	139019	61.5413	17583	0.280048
574	X	1	3	44	3.44	3.44	6079	8.32348	9707	0.504678	988332	39.2156	211075	2.14841	44925	1.69005	34255	0.55023	132829	47.3606	16139	0.207037
574	X	1	3	46	3.46	3.46	5784	8.30238	9061	0.493864	877237	36.49	189245	2.01933	45429	1.79162	15611	0.262877	134959	50.4461	14414	0.193846
574	X	1	3	48	3.48	3.48	4234	5.66195	8893	0.451565	1334100	51.6994	161148	1.60195	34457	1.26599	45447	0.712966	110460	38.4656	11220	0.140575
574	X	1	3	50	3.5	3.5	5226	6.63058	9951	0.479408	1271170	46.7379	190619	1.79786	40723	1.41958	51051	0.759861	127168	42.0157	13387	0.159134
574	X	1	3	52	3.52	3.52	5745	8.12044	11382	0.610893	960526	39.3443	227773	2.39332	43417	1.68612	51504	0.85404	127036	46.7593	17489	0.231608
574	X	1	3	54	3.54	3.54	2509	3.11008	7257	0.341574	1930150	69.3338	106226	0.978837	21162	0.720719	29596	0.43038	77383	24.9786	9128	0.106009
574	X	1	3	56	3.56	3.56	1518	1.63603	4584	0.187595	2584940	80.7337	66801	0.535195	12973	0.384149	21716	0.274567	57695	16.1924	5586	0.0564053
574	X	1	3	58	3.58	3.58	2020	2.18996	4366	0.179732	2405990	75.5896	83897	0.676145	18063	0.538038	15451	0.196512	72871	20.5727	5647	0.0573589
574	X	1	3	60	3.6	3.6	1222	1.26092	3857	0.151121	2782860	83.2131	56932	0.4367	10644	0.301759	25448	0.308048	53161	14.2844	4544	0.0439293
574	X	1	3	62	3.62	3.62	1728	1.84548	4573	0.185448	2589150	80.1317	66471	0.527723	13333	0.391229	37190	0.465949	58950	16.3946	5787	0.057905
574	X	1	3	66	3.66	3.66	1543	1.63198	4205	0.168878	2663550	81.6381	56590	0.444937	12216	0.354991	37019	0.459327	55421	15.2642	3786	0.037517
574	X	1	3	68	3.68	3.68	1375	1.4401	3700	0.147146	2717260	82.4712	57147	0.444929	12052	0.346806	29226	0.359092	54068	14.7462	4532	0.044471
574	X	1	3	70	3.7	3.7	1959	2.06896	4181	0.16767	2619840	80.1818	58097	0.456122	13546	0.393068	17639	0.218545	59887	16.4703	4397	0.0435084
574	X	1	3	72	3.72	3.72	1429	1.58898	3435	0.145034	2529720	81.5159	58538	0.483875	13789	0.421268	5843	0.0762203	54311	15.7263	4076	0.0424638
574	X	1	3	74	3.74	3.74	4546	8.72818	7676	0.559611	616546	34.3038	173074	2.47022	36013	1.89973	1789	0.0402951	103551	51.7726	12536	0.225503
574	X	1	3	76	3.76	3.76	5396	9.29966	8571	0.560898	605816	30.2565	238522	3.05585	44218	2.09379	8298	0.167771	121029	54.317	15388	0.248471
574	X	1	3	80	3.8	3.8	2605	2.87331	6445	0.269932	2235580	71.4577	102872	0.843491	23881	0.723712	31011	0.401272	81283	23.3467	8119	0.0839026
574	X	1	3	82	3.82	3.82	3804	4.47833	9061	0.40505	1782940	60.8269	139641	1.22207	31660	1.02406	39313	0.54295	102366	31.3821	10742	0.118484
574	X	1	3	84	3.84	3.84	4749	5.79714	9749	0.451885	1560960	55.2188	152221	1.38132	34869	1.16947	49593	0.710198	110501	35.126	12687	0.1451
574	X	1	3	86	3.86	3.86	4415	6.62242	11542	0.657391	1076180	46.7793	176257	1.96535	37443	1.5431	58491	1.02925	105513	41.2139	13471	0.189315
574	X	1	3	88	3.88	3.88	4440	6.17553	9971	0.526607	1222120	49.2593	171474	1.77296	36393	1.39075	56026	0.914174	109817	39.7752	14233	0.185475
574	X	1	3	90	3.9	3.9	5366	7.39869	9624	0.503868	1109630	44.3367	187653	1.92339	40452	1.53244	61339	0.992176	120152	43.1406	13318	0.172045
574	X	1	3	92	3.92	3.92	5105	7.00533	10516	0.547949	1116850	44.4129	187743	1.91516	42031	1.58468	62673	1.00893	121272	43.3356	14737	0.18947
574	X	1	3	94	3.94	3.94	4608	5.76528	11328	0.538168	1448820	52.5297	166355	1.54722	37111	1.2757	62860	0.922636	114372	37.2631	13492	0.158155
574	X	1	3	96	3.96	3.96	5288	7.03743	11599	0.586138	1197240	46.1727	186509	1.84515	40519	1.48156	64837	1.01226	120283	41.6849	14429	0.179911
574	X	1	3	98	3.98	3.98	4143	5.31264	10444	0.508533	1516910	56.3689	145601	1.38793	32364	1.14024	48866	0.735107	103055	34.4125	11163	0.134114
574	X	1	3	100	4	4	3525	4.80008	8669	0.448245	1536030	60.614	120011	1.21484	26824	1.00358	37865	0.604888	88003	31.206	8489	0.108304
574	X	1	3	102	4.02	4.02	4781	6.34073	9963	0.501727	1355660	52.102	159049	1.56805	35132	1.28015	46682	0.726303	108078	37.3258	12496	0.155271
574	X	1	3	104	4.04	4.04	2992	3.37277	7964	0.34089	2012060	65.728	110985	0.930034	25723	0.796683	35207	0.465589	96211	28.2424	11709	0.123664
574	X	1	3	106	4.06	4.06	2667	2.77043	7926	0.312634	2343660	70.5507	103174	0.796716	23922	0.682748	34465	0.420002	90097	24.3717	9762	0.0950084
574	X	1	3	108	4.08	4.08	3984	4.29633	7672	0.314155	2106720	65.8367	122977	0.98585	29104	0.862322	21479	0.271732	97301	27.3242	10764	0.108755
574	X	1	3	110	4.1	4.1	3844	4.67832	9131	0.42197	1683980	59.3917	133746	1.21003	30370	1.01552	39705	0.566891	102754	32.5654	13174	0.150218
574	X	1	3	112	4.12	4.12	1490	1.46194	5399	0.201147	2866080	81.4917	65320	0.476428	12726	0.343062	26123	0.300686	61282	15.6577	7325	0.0673362
574	X	1	3	114	4.14	4.14	667	0.631756	3567	0.128287	3157410	86.6638	41113	0.289475	6472	0.168423	19573	0.217485	48077	11.858	4813	0.0427108
574	X	1	3	116	4.16	4.16	1141	1.17008	3608	0.140492	2771300	82.3561	55504	0.423118	11379	0.320606	22935	0.275915	57147	15.2607	5519	0.0530258
574	X	1	3	120	4.2	4.2	441	0.441026	2053	0.0779598	3171340	91.9076	22463	0.166994	2124	0.0583604	9456	0.110938	27715	7.21758	2083	0.019517
574	X	1	3	122	4.22	4.22	210	0.234578	2115	0.0897087	2843220	92.0367	18660	0.154949	1710	0.052481	8612	0.112855	25078	7.29477	2291	0.0239768
574	X	1	3	124	4.24	4.24	269	0.282877	1977	0.078942	3019660	92.0207	20291	0.15862	1264	0.0365199	8162	0.100691	26671	7.30357	1830	0.0180299
574	X	1	3	126	4.26	4.26	246	0.262049	2080	0.0841333	2960390	91.386	22379	0.177214	2558	0.0748664	9363	0.117007	28411	7.88108	1764	0.0176054
574	X	1	3	128	4.28	4.28	193	0.212222	2339	0.0976606	2854770	90.9676	23808	0.194609	2772	0.083746	8958	0.115556	28995	8.30246	2537	0.0261367
574	X	1	3	130	4.3	4.3	41	0.0470565	1728	0.0753072	2816500	93.676	17064	0.145588	1020	0.0321643	7497	0.100942	19764	5.90694	1487	0.0159899
574	X	1	3	132	4.32	4.32	148	0.157563	1523	0.0615672	3034540	93.6198	17735	0.140356	1914	0.0559851	6828	0.0852774	21137	5.85986	1965	0.0195999
574	X	1	3	134	4.34	4.34	772	1.04787	3416	0.176061	2141150	84.2208	41423	0.417964	8722	0.325269	11784	0.187642	38411	13.5767	3749	0.0476763
574	X	1	3	136	4.36	4.36	18	0.0215494	1734	0.078826	2694140	93.4688	16792	0.149443	1251	0.041149	10555	0.148241	19477	6.07207	1779	0.0199543
574	X	1	3	138	4.38	4.38	93	0.110856	1669	0.0755424	2701510	93.3183	17032	0.150922	626	0.0205017	13268	0.185537	19681	6.10908	2620	0.0292602
574	X	2	1	66	5.16	5.76	1088	1.68633	3133	0.184387	1762700	79.1723	45804	0.527746	10757	0.458081	11723	0.213157	43854	17.7	3993	0.0579843
574	X	2	1	68	5.18	5.78	1631	2.45571	4296	0.245609	1697780	74.0776	60152	0.673258	13472	0.557305	8666	0.15307	55547	21.7788	4155	0.0586127
574	X	2	1	70	5.2	5.8	1627	2.32169	4121	0.223293	1794980	74.2263	63415	0.672692	15626	0.612635	20337	0.340448	57968	21.5405	4675	0.0625022
574	X	2	1	72	5.22	5.82	2534	3.90746	6952	0.407056	1447920	64.7018	85770	0.983178	20631	0.874071	35435	0.641015	70687	28.3843	6997	0.101088
574	X	2	1	74	5.24	5.84	2557	3.83822	5749	0.327679	1452400	63.1785	88949	0.992543	23054	0.950789	16111	0.283707	77602	30.3336	6752	0.0949577
574	X	2	1	76	5.26	5.86	2697	3.81736	5180	0.2784	1605810	65.8656	89393	0.940578	20523	0.798108	7305	0.121297	76205	28.0878	6850	0.0908388
574	X	2	1	78	5.28	5.88	2506	3.9192	5623	0.333919	1429540	64.7883	88596	1.03	19841	0.852546	9049	0.166022	70755	28.8154	6459	0.094641
574	X	2	1	80	5.3	5.9	2567	3.67144	6013	0.326556	1580700	65.5153	85841	0.91267	20509	0.805922	11652	0.195505	76492	28.489	6235	0.0835497
574	X	2	1	82	5.32	5.92	1718	2.3445	4293	0.222457	1904220	75.3059	57791	0.586269	13431	0.503587	11066	0.17716	58535	20.8015	4583	0.0585971
574	X	2	1	84	5.34	5.94	1328	1.89951	4639	0.251956	1860650	77.124	50853	0.540714	11264	0.442664	12088	0.202836	52301	19.4807	4300	0.0576248
574	X	2	1	86	5.36	5.96	1603	2.27226	4417	0.237744	1839550	75.5647	53571	0.564499	12201	0.47518	14369	0.238946	55788	20.5929	4052	0.0538136
574	X	2	1	88	5.38	5.98	2579	4.0085	6867	0.405279	1387040	62.4744	96931	1.11996	21930	0.9365	10870	0.198202	75989	30.7562	6932	0.100946
574	X	2	1	90	5.4	6	2813	3.89798	5341	0.281028	1579720	63.4355	79035	0.814138	18846	0.717509	6492	0.105535	84959	30.6571	7032	0.091295
574	X	2	1	92	5.42	6.02	3127	4.53143	7901	0.434757	1351480	56.7545	103591	1.11593	23711	0.944051	33312	0.566312	94158	35.5317	8935	0.121311
574	X	2	1	94	5.44	6.04	3644	5.07588	5725	0.302807	1438450	58.0646	99618	1.03153	23499	0.899334	14605	0.238662	94490	34.2745	8637	0.112718
574	X	2	1	96	5.46	6.06	3302	5.00175	6961	0.400381	1227990	53.9041	116515	1.312	25796	1.07358	10867	0.193109	96321	37.9942	8518	0.120887
574	X	2	1	98	5.48	6.08	3838	5.93267	6168	0.362032	1150540	51.5385	123960	1.42441	26527	1.12661	4974	0.0901984	97878	39.3987	8764	0.126925
574	X	2	1	100	5.5	6.1	4517	6.83195	6802	0.39065	1024930	44.9235	142120	1.59793	33100	1.3755	4734	0.0839984	113326	44.635	11393	0.161447
574	X	2	1	102	5.52	6.12	5426	9.24232	7221	0.467041	648984	32.0345	186191	2.35759	38955	1.82307	4678	0.0934779	121211	53.7644	13636	0.217614
574	X	2	1	104	5.54	6.14	5195	7.89858	8394	0.484606	853425	37.6021	157671	1.78207	37226	1.55506	8425	0.150273	127150	50.3421	13007	0.185284
574	X	2	1	106	5.56	6.16	6061	8.64228	8533	0.462001	886805	36.6434	163115	1.72897	40773	1.59733	5067	0.0847584	136438	50.6607	13522	0.180644
574	X	2	1	108	5.58	6.18	4771	8.37404	8132	0.541975	651353	33.1303	201376	2.62749	39088	1.88498	6861	0.141273	116129	53.0784	13477	0.221624
574	X	2	1	110	5.6	6.2	4298	6.51254	8464	0.486986	1012690	44.4675	167404	1.88564	35184	1.46476	6826	0.121338	113783	44.8965	11600	0.16468
574	X	2	1	112	5.62	6.22	4517	7.91605	7414	0.493364	717305	36.4288	180288	2.34873	36278	1.74679	4963	0.102035	111226	50.7594	12475	0.204832
574	X	2	1	114	5.64	6.24	4550	7.90611	7941	0.523942	709926	35.7476	188775	2.4384	36824	1.75801	5806	0.118352	113357	51.2922	13231	0.215398
574	X	2	1	116	5.66	6.26	4524	7.51622	8000	0.504689	827648	39.8479	184933	2.28402	36860	1.68256	15197	0.296198	110166	47.6624	13233	0.205984
574	X	2	1	118	5.68	6.28	4023	5.78571	6533	0.35676	1267900	52.8414	142057	1.51872	29658	1.17189	9582	0.161663	101548	38.0303	9914	0.133584
574	X	2	1	120	5.7	6.3	4784	7.28281	6323	0.3655	1019220	44.9635	174031	1.96944	36216	1.51477	8358	0.149265	109977	43.5975	11024	0.157234
574	X	2	1	122	5.72	6.32	4906	8.70468	7832	0.527661	658122	33.8388	192433	2.53813	37920	1.84855	14607	0.304042	112579	52.0157	13384	0.222489
574	X	2	1	124	5.74	6.34	4533	6.91012	7571	0.438238	1044000	46.1194	165803	1.87889	33844	1.41749	16544	0.295861	107751	42.7733	11676	0.16676
574	X	2	1	126	5.76	6.36	4241	6.16727	7112	0.392711	1201480	50.6319	157501	1.70262	31937	1.27602	13409	0.228754	104204	39.4603	10309	0.140456
574	X	2	1	128	5.78	6.38	4168	5.98256	8608	0.469157	1209470	50.308	160400	1.71148	33837	1.33441	21465	0.361441	106126	39.6673	12319	0.165666
574	X	2	1	132	5.82	6.42	3810	5.01803	8878	0.443997	1498760	57.2036	142372	1.39393	29368	1.06273	22434	0.346627	100243	34.3806	12195	0.150483
574	X	2	1	134	5.84	6.44	3081	4.55622	7280	0.408791	1403350	60.1398	127866	1.40565	26374	1.07159	25747	0.446671	82684	31.841	9404	0.130294
574	X	2	1	136	5.86	6.46	4423	6.19779	8365	0.445085	1180610	47.9411	177512	1.84908	37151	1.43031	31455	0.51708	113576	41.4436	13396	0.175871
574	X	2	1	138	5.88	6.48	3704	6.74041	7597	0.524946	852204	44.9409	148488	2.0087	29522	1.47604	13254	0.28295	92526	43.8461	10556	0.179975
574	X	2	1	140	5.9	6.5	2481	7.0013	5824	0.624066	501297	40.9949	119350	2.50371	21031	1.63061	15271	0.505554	63261	46.4879	9530	0.251967
574	X	2	2	2	6.02	6.62	3938	7.50426	6687	0.483861	704255	38.8906	153457	2.17384	32043	1.67766	27206	0.608198	97654	48.4589	11349	0.202623
574	X	2	2	4	6.04	6.64	6309	9.23424	12567	0.698439	778788	33.0326	226146	2.46058	46055	1.85206	36180	0.621236	136065	51.8607	17514	0.240173
574	X	2	2	6	6.06	6.66	5319	9.07854	11598	0.751667	554593	27.4311	222833	2.82731	44599	2.09146	32391	0.648572	128036	56.9075	16501	0.263873
574	X	2	2	8	6.08	6.68	6039	9.47567	12386	0.73796	609263	27.7034	229462	2.67648	48150	2.07577	36412	0.67025	138067	56.4139	16775	0.246607
574	X	2	2	10	6.1	6.7	5728	9.72312	12940	0.834053	534762	26.3055	235416	2.97062	46754	2.18052	48095	0.957746	128371	56.7441	17877	0.284312
574	X	2	2	12	6.12	6.72	5322	8.95077	11009	0.703057	680199	33.1516	210151	2.6274	42397	1.95911	42810	0.844654	117649	51.5259	15074	0.237527
574	X	2	2	14	6.14	6.74	6215	10.6799	12525	0.817261	416411	20.7363	237357	3.03205	49268	2.32611	71759	1.44661	135546	60.6547	19076	0.307122
574	X	2	2	16	6.16	6.76	6789	10.9474	11637	0.712532	443531	20.7259	261806	3.1383	52310	2.31755	30875	0.584065	145972	61.2953	18460	0.278892
574	X	2	2	20	6.2	6.8	7296	11.7641	11770	0.720623	335325	15.6684	284513	3.41025	57226	2.53517	22225	0.420402	155215	65.1718	20469	0.309222
574	X	2	2	22	6.22	6.82	6132	8.98851	11864	0.660349	715394	30.3888	251474	2.74023	51026	2.05502	41639	0.716034	141978	54.1948	18657	0.256227
574	X	2	2	24	6.24	6.84	6713	10.3392	12320	0.720503	543057	24.238	261541	2.99445	54624	2.31148	22881	0.41342	146363	58.7017	19492	0.28127
574	X	2	2	26	6.26	6.86	6680	10.0917	10584	0.607148	585799	25.646	268262	3.0127	55601	2.30786	29470	0.522295	146266	57.5417	19117	0.270586
574	X	2	2	28	6.28	6.88	5916	8.19425	11915	0.62666	912826	36.6397	223472	2.30098	46070	1.75322	26710	0.434013	138136	49.8241	17501	0.227113
574	X	2	2	30	6.3	6.9	5447	6.297	8138	0.357232	1471810	49.3072	151631	1.30309	38575	1.22524	8559	0.116077	137050	41.2579	12579	0.136245
574	X	2	2	32	6.32	6.92	5687	8.24413	10327	0.56845	887321	37.2757	206837	2.22894	43260	1.723	18011	0.3063	131004	49.4536	14722	0.199952
574	X	2	2	34	6.34	6.94	4950	6.91225	8816	0.467458	1159400	46.9168	162802	1.68998	35874	1.37636	8791	0.144013	116439	42.3413	11603	0.151804
574	X	2	2	36	6.36	6.96	3968	4.42667	5387	0.228197	1850580	59.8269	124787	1.03486	30487	0.934455	5479	0.0717058	114930	33.388	8539	0.0892505
574	X	2	2	38	6.38	6.98	2299	2.66811	5177	0.228139	2115410	71.1446	89447	0.771683	21391	0.682078	9165	0.12478	80429	24.3069	6785	0.0737756
574	X	2	2	40	6.4	7	3465	4.05828	6044	0.268794	1910520	64.8446	112074	0.975781	25825	0.831031	13350	0.183429	94239	28.7423	8735	0.0958517
574	X	2	2	42	6.42	7.02	3485	4.05755	6786	0.300008	1847970	62.3503	114441	0.990494	27658	0.88475	15256	0.208377	102617	31.1123	8817	0.0961791
574	X	2	2	44	6.44	7.04	4626	5.9926	9820	0.483034	1444200	54.215	151592	1.4598	34549	1.22966	10205	0.155085	107647	36.3131	12504	0.15176
574	X	2	2	46	6.46	7.06	4372	5.45078	9038	0.427866	1524980	55.0967	153354	1.42129	34576	1.18438	5366	0.0784833	111521	36.2065	11470	0.13398
574	X	2	2	48	6.48	7.08	4788	5.29378	6915	0.290309	1720160	55.1141	143551	1.17985	33661	1.02253	5034	0.0652939	128233	36.9201	11014	0.114092
574	X	2	2	50	6.5	7.1	5786	6.53253	8339	0.357498	1428780	46.7468	186332	1.56386	41497	1.28724	5571	0.0737877	147224	43.2845	14538	0.153782
574	X	2	2	52	6.52	7.12	6342	7.42535	9876	0.439065	1233770	41.8608	209431	1.8228	46047	1.48126	5821	0.0799532	153217	46.7142	16096	0.176566
574	X	2	2	54	6.54	7.14	6701	8.04815	10445	0.476345	1111870	38.6983	219967	1.96391	48227	1.59142	4923	0.069364	156537	48.9581	17275	0.194389
574	X	2	2	56	6.56	7.16	6125	7.29035	8069	0.364686	1237600	42.6879	208223	1.84238	44839	1.46635	5946	0.0830261	148736	46.1009	14741	0.164387
574	X	2	2	58	6.58	7.18	6659	8.00989	10050	0.459029	1103500	38.4658	230866	2.06436	47390	1.56618	6040	0.0852319	156957	49.1643	16440	0.185275
574	X	2	2	60	6.6	7.2	6722	8.23743	12340	0.574202	1020900	36.2544	244192	2.2245	50231	1.69123	5204	0.0748132	158998	50.7383	17864	0.205102
574	X	2	2	62	6.62	7.22	6576	8.54464	12382	0.610913	915007	34.454	234907	2.26901	48778	1.74138	4532	0.0690828	153987	52.1036	17039	0.207431
574	X	2	2	64	6.64	7.24	6397	7.88828	11124	0.520863	1067400	38.143	228640	2.09588	48220	1.6337	4029	0.0582842	154052	49.468	16615	0.191957
574	X	2	2	66	6.66	7.26	6081	7.62264	10921	0.519816	1165740	42.3463	207374	1.93238	43500	1.49816	4502	0.0662039	140384	45.8247	16166	0.189859
574	X	2	2	68	6.68	7.28	5460	6.10066	10614	0.450319	1569150	50.808	178809	1.48519	40206	1.23428	5268	0.0690522	136470	39.7075	13851	0.144998
574	X	2	2	70	6.7	7.3	5071	7.12961	11491	0.613461	1034040	42.1299	196989	2.05884	40884	1.5793	4869	0.0803082	126215	46.2099	15083	0.198682
574	X	2	2	72	6.72	7.32	5377	6.96449	12626	0.620972	1197020	44.9298	201293	1.93815	41545	1.47845	9579	0.145552	129651	43.7297	15896	0.192901
574	X	2	2	74	6.74	7.34	4497	5.02684	8697	0.369146	1787720	57.9101	146785	1.21973	32728	1.00515	15280	0.200375	117328	34.1527	11073	0.115967
574	X	2	2	76	6.76	7.36	4830	6.40296	11465	0.577118	1265220	48.6051	180705	1.78079	39693	1.44573	14161	0.220229	118182	40.7978	13709	0.17027
574	X	2	2	78	6.78	7.38	6084	9.14026	14722	0.839833	735024	32.0003	238127	2.65942	47538	1.96222	43996	0.775408	133813	52.3503	19345	0.272293
574	X	2	2	80	6.8	7.4	6163	8.70584	14947	0.801732	844360	34.5644	240222	2.52255	48580	1.88545	17866	0.29607	138575	50.9747	18829	0.249198
574	X	2	2	82	6.82	7.42	4924	5.89412	9666	0.439344	1486840	51.5762	175321	1.56007	38610	1.26981	13342	0.187357	124865	38.9218	13486	0.151246
574	X	2	2	84	6.84	7.44	5245	6.8804	10952	0.54553	1173130	44.596	200362	1.95385	41066	1.48009	26214	0.403412	128622	43.9374	16539	0.203271
574	X	2	2	86	6.86	7.46	4901	6.22254	11622	0.5603	1338790	49.2581	173459	1.63715	36985	1.29017	7356	0.109565	123295	40.7643	13273	0.157888
574	X	2	2	88	6.88	7.48	6912	9.32111	10306	0.527729	714917	27.9385	214831	2.15362	46317	1.7161	6455	0.102119	165240	58.0271	16921	0.21379
574	X	2	2	90	6.9	7.5	7367	9.5488	10241	0.504031	795961	29.8974	240475	2.31706	51616	1.83815	5952	0.0905042	164621	55.5642	19757	0.239926
574	X	2	2	92	6.92	7.52	7940	10.6284	10908	0.554435	590719	22.9146	268493	2.67172	54524	2.00528	6438	0.101099	174612	60.866	20605	0.258416
574	X	2	2	96	6.96	7.56	6251	8.91733	12445	0.674119	826803	34.1798	247751	2.6273	48754	1.91088	5699	0.0953743	138224	51.3476	18524	0.247581
574	X	2	2	98	6.98	7.58	5672	7.77697	11557	0.601694	1034180	41.0917	219980	2.24216	45027	1.69623	9369	0.150701	129475	46.2287	16493	0.211871
574	X	2	2	100	7	7.6	5723	7.73899	11687	0.600095	1082640	42.4257	211100	2.12206	44354	1.6479	12777	0.202692	127950	45.0559	16305	0.206576
574	X	2	2	102	7.02	7.62	5128	6.11066	10275	0.464921	1550710	53.5492	161647	1.43191	36149	1.18352	10498	0.146756	119153	36.974	12455	0.139054
574	X	2	2	104	7.04	7.64	3329	5.69402	8184	0.53153	1070390	53.0554	127229	1.61771	24312	1.14252	4778	0.0958736	84647	37.7023	10023	0.160621
574	X	2	2	106	7.06	7.66	2918	3.47946	6818	0.308703	2014370	69.6065	101541	0.900071	22446	0.735367	12062	0.168731	79573	24.7084	8308	0.0928157
574	X	2	2	108	7.08	7.68	3802	4.30488	8804	0.378517	1996880	65.5215	126333	1.06335	25227	0.784789	11454	0.152144	93926	27.694	9502	0.1008
574	X	2	2	110	7.1	7.7	1791	1.82776	4125	0.159847	2707320	80.0654	59607	0.452198	13216	0.370562	10598	0.12688	63794	16.9533	4610	0.044078
574	X	2	2	112	7.12	7.72	1756	1.9314	4873	0.203517	2490740	79.3888	58763	0.480464	13580	0.41038	11782	0.152025	60676	17.3787	5316	0.0547811
574	X	2	2	114	7.14	7.74	2928	3.03096	4859	0.190991	2480500	74.4099	87214	0.671126	19944	0.567231	9345	0.113484	77723	20.9513	6707	0.0650483
574	X	2	2	116	7.16	7.76	3368	3.50239	5762	0.227522	2329590	70.203	95954	0.741762	24682	0.705199	7601	0.0927281	90282	24.4481	8137	0.0792785
574	X	2	2	118	7.18	7.78	2801	3.30484	5195	0.232745	2094450	71.6126	91743	0.804672	21374	0.692886	7577	0.104878	75438	23.1782	6263	0.0692338
574	X	2	2	120	7.2	7.8	2950	3.35117	6261	0.270069	2114840	69.6202	92263	0.779132	22627	0.70622	23585	0.31431	84128	24.8867	6784	0.0722036
574	X	2	2	122	7.22	7.82	3079	3.46755	5911	0.252773	2127220	69.4239	96596	0.808688	22651	0.700872	32516	0.429594	84693	24.8377	7477	0.078893
574	X	2	2	124	7.24	7.84	2572	2.89139	6156	0.262779	2210250	72.0044	91065	0.761019	21632	0.668144	26027	0.343247	78535	22.9906	7449	0.0784569
574	X	2	2	126	7.26	7.86	2514	2.77395	6172	0.258592	2277740	72.8316	93873	0.769985	21225	0.643456	26159	0.338612	77629	22.3053	7591	0.0784748
574	X	2	2	128	7.28	7.88	2466	2.78386	6407	0.274641	2237740	73.2061	88212	0.74027	20913	0.648647	25617	0.339258	74615	21.9347	6861	0.0725671
574	X	2	2	130	7.3	7.9	2396	2.49523	6838	0.270401	2440180	73.6425	92639	0.717176	21930	0.62748	30145	0.368287	80398	21.8032	7761	0.0757249
574	X	2	2	132	7.32	7.92	2580	2.77227	6747	0.275286	2327800	72.4845	92465	0.738588	21341	0.630041	31630	0.398715	80826	22.6161	8389	0.0844548
574	X	2	2	134	7.34	7.94	2862	3.07777	7169	0.29274	2264560	70.5722	97036	0.775726	24784	0.732279	29879	0.376947	86045	24.0959	7583	0.0764022
574	X	2	2	136	7.36	7.96	4524	5.49023	9986	0.460168	1636250	57.5439	146042	1.31751	32456	1.08218	29932	0.426139	106188	33.5579	10731	0.122013
574	X	2	2	138	7.38	7.98	4954	5.73613	12195	0.536168	1649590	55.3505	153492	1.32117	37005	1.17723	27928	0.379359	117273	35.36	12852	0.139422
574	X	2	2	140	7.4	8	4024	4.65795	10121	0.444853	1825220	61.2258	135004	1.1617	32078	1.02019	19735	0.267992	103200	31.1077	10497	0.113841
574	X	2	2	142	7.42	8.02	5106	7.14729	10651	0.566119	1124900	45.6306	175500	1.82619	39506	1.51936	5894	0.0967873	118105	43.0507	12422	0.162911
574	X	2	2	144	7.44	8.04	3336	6.69865	8753	0.667382	778172	45.2814	128383	1.91636	27900	1.53923	11266	0.265386	83080	43.4419	10084	0.189711
574	X	2	3	84	8.34	8.94	2659	7.24491	7651	0.791571	519050	40.9833	117664	2.38324	21478	1.60786	34374	1.09873	64366	45.6691	8667	0.221249
574	X	2	3	86	8.36	8.96	4959	8.13974	11113	0.692635	729912	34.7192	207632	2.53349	41436	1.86867	61461	1.18349	118448	50.6286	15230	0.234215
574	X	2	3	88	8.38	8.98	5123	8.04831	13894	0.828828	811088	36.9259	216031	2.52293	41603	1.79574	64306	1.18517	118426	48.4483	16629	0.244762
574	X	2	3	90	8.4	9	4852	7.10191	13994	0.777774	964647	40.9172	210646	2.29201	41049	1.6508	67317	1.15592	120324	45.8626	17634	0.241826
574	X	2	3	96	8.46	9.06	5023	7.46129	11945	0.673742	953624	41.0498	199707	2.20522	40452	1.65093	49490	0.862415	118587	45.8711	16201	0.225471
574	X	2	3	98	8.48	9.08	5063	7.47914	11398	0.639336	944990	40.4533	203020	2.22942	41789	1.69607	48416	0.839035	120706	46.4327	16694	0.231048
574	X	2	3	100	8.5	9.1	4975	6.94489	11276	0.597701	1072580	43.3896	197121	2.04557	41435	1.5892	59885	0.980705	121702	44.2407	16185	0.211682
574	X	2	3	102	8.52	9.12	4530	6.69027	11623	0.65181	1081990	46.3075	176302	1.93558	35367	1.4351	52594	0.911233	108841	41.8591	15134	0.20941
574	X	2	3	104	8.54	9.14	4621	6.24168	9789	0.502066	1236690	48.407	184050	1.84803	36762	1.36428	29196	0.462633	116541	40.9917	14432	0.182638
574	X	2	3	106	8.56	9.16	4462	5.62425	10844	0.519017	1475660	53.9019	162614	1.52371	34952	1.21045	47261	0.698853	110718	36.3417	15257	0.180178
574	X	2	3	108	8.58	9.18	3866	5.28816	11082	0.575595	1354990	53.7108	160474	1.63176	32341	1.21544	49337	0.791704	102791	36.6141	13452	0.172396
574	X	2	3	110	8.6	9.2	4848	7.10083	9648	0.536588	1041130	44.191	187453	2.04102	37283	1.50036	43720	0.751233	114458	43.656	16244	0.222914
574	X	2	3	112	8.62	9.22	4455	6.49134	11114	0.614913	1116670	47.1513	177371	1.92122	35819	1.43397	50640	0.865622	108887	41.3156	15093	0.206044
574	X	2	3	114	8.64	9.24	3465	5.40441	9774	0.578861	1135690	51.3322	156495	1.81449	31270	1.34002	48488	0.887212	94721	38.4719	11700	0.170974
574	X	2	3	116	8.66	9.26	4287	5.9249	12805	0.671992	1268830	50.8174	161840	1.66273	33753	1.28168	57018	0.924458	107058	38.5299	14433	0.186888
574	X	2	3	118	8.68	9.28	4255	6.5564	14322	0.837966	997971	44.5622	188900	2.16375	36848	1.55998	72949	1.31866	106531	42.7458	17680	0.255239
574	X	2	3	120	8.7	9.3	3236	4.84359	10611	0.603076	1311890	56.9036	137979	1.53526	27656	1.13733	29338	0.515154	87920	34.2687	13782	0.193272
574	X	2	3	122	8.72	9.32	5096	7.43085	14907	0.825384	901910	38.1114	209062	2.26617	42919	1.71948	72249	1.23592	126848	48.1664	17887	0.244368
574	X	2	3	124	8.74	9.34	5117	8.19731	13257	0.806414	752786	34.947	212436	2.52984	42660	1.87765	11809	0.22193	122733	51.1999	14654	0.219943
574	X	2	3	126	8.76	9.36	4012	7.69721	11265	0.820654	648160	36.0361	188817	2.69291	34307	1.80839	21135	0.475688	100498	50.2089	14473	0.260153
574	X	2	3	128	8.78	9.38	4664	7.45189	15253	0.92538	838214	38.8102	204246	2.42588	41190	1.80816	70407	1.31969	112966	47.001	17223	0.257819
574	X	2	3	130	8.8	9.4	4709	7.63247	15965	0.982567	763787	35.875	210119	2.53169	41435	1.8452	84730	1.6111	116704	49.2577	17406	0.264322
574	X	2	3	132	8.82	9.42	5093	8.41168	14308	0.897315	684417	32.7577	226450	2.78029	42979	1.95031	48661	0.94284	120822	51.9645	19089	0.295387
574	X	2	3	134	8.84	9.44	5222	8.04566	14827	0.867431	778884	34.7761	213806	2.4488	43718	1.85065	51916	0.938369	126662	50.8186	17626	0.254435
574	X	2	3	136	8.86	9.46	5126	7.8492	12774	0.74273	902993	40.0695	196732	2.2394	39536	1.66333	39956	0.717756	116629	46.5056	14810	0.212471
574	X	2	3	138	8.88	9.48	3924	7.22977	13592	0.950902	761577	40.6623	180707	2.47502	34067	1.72452	45377	0.980797	95282	45.7149	15165	0.26178
574	X	2	3	140	8.9	9.5	4947	8.35754	14060	0.901942	715913	35.0493	209112	2.62618	41390	1.92119	53142	1.05323	113241	49.8186	17182	0.271962
574	X	2	3	142	8.92	9.52	4516	7.12803	12678	0.759842	871119	39.8452	189207	2.22004	38913	1.68752	63606	1.17777	114248	46.9586	15076	0.222946
574	X	2	3	144	8.94	9.54	5098	7.75536	16205	0.936069	833153	36.729	217142	2.45558	44354	1.85384	71267	1.27186	122994	48.7234	19287	0.274894
574	X	2	3	146	8.96	9.56	4627	6.98457	14242	0.816334	1024880	44.8326	172369	1.93423	36882	1.52965	54085	0.957778	108737	42.7434	14244	0.201451
574	X	2	3	148	8.98	9.58	4429	7.38452	12194	0.772004	830651	40.1345	176426	2.18669	37634	1.72399	58523	1.1447	106937	46.4297	14327	0.223805
574	X	2	4	2	9.02	9.62	4723	7.50929	9330	0.563273	854464	39.3693	171639	2.02864	38547	1.68387	43491	0.8112	115543	47.8383	13165	0.19611
574	X	2	4	4	9.04	9.64	4685	6.42873	12067	0.628741	1188980	47.2797	173530	1.7701	40343	1.52098	47683	0.767586	115957	41.4347	13183	0.169484
574	X	2	4	6	9.06	9.66	4511	6.4602	12777	0.694798	1146990	47.6009	167747	1.78581	38336	1.50841	43914	0.737774	110017	41.0283	13694	0.183739
574	X	2	4	8	9.08	9.68	4372	6.45036	10309	0.577533	1120680	47.9148	158621	1.7397	36252	1.46952	37451	0.648209	106790	41.0285	12396	0.17135
574	X	2	4	10	9.1	9.7	4327	6.53886	11470	0.658166	1094250	47.9197	158754	1.7834	35521	1.47482	48584	0.861304	103132	40.5845	12660	0.179245
574	X	2	4	12	9.12	9.72	852	6.72624	1853	0.555476	202699	46.3732	32728	1.92071	2628	0.570028	7120	0.659418	20928	43.0241	2309	0.170787
574	X	2	4	14	9.14	9.74	4521	5.97822	12583	0.631798	1308060	50.1244	172011	1.69084	37887	1.37647	51283	0.795534	113922	39.228	14104	0.174734
574	X	2	4	16	9.16	9.76	4387	6.28092	12453	0.676996	1114600	46.2442	193596	2.06044	39728	1.56275	50624	0.850275	112930	42.1033	16482	0.221087
574	X	2	4	18	9.18	9.78	3945	5.61496	11874	0.641732	1288750	53.1559	164441	1.73988	33886	1.32513	48047	0.802258	98588	36.5406	13468	0.179598
574	X	2	4	20	9.2	9.8	3678	4.84856	11036	0.552421	1517220	57.9608	153525	1.50449	32233	1.16746	29222	0.451917	97201	33.3675	11891	0.146865
574	X	2	4	22	9.22	9.82	3542	4.9762	9892	0.527704	1376350	56.0354	150997	1.57698	32288	1.24632	21158	0.348716	96086	35.1529	10316	0.135787
574	X	2	4	24	9.24	9.84	3649	5.04791	12196	0.640637	1394330	55.8966	152256	1.56575	32584	1.23846	46833	0.760042	96287	34.6862	12684	0.164396
574	X	2	4	26	9.26	9.86	3475	4.68538	10705	0.548067	1439680	56.2523	149449	1.49793	32516	1.20455	40620	0.642507	99746	35.0217	11683	0.147585
574	X	2	4	28	9.28	9.88	3715	4.82569	10779	0.531662	1499000	56.4269	142265	1.37375	31679	1.1306	35336	0.538475	103625	35.0523	9910	0.120607
574	X	2	4	30	9.3	9.9	3068	4.07864	9578	0.483494	1534920	59.1326	139541	1.37902	30219	1.10377	35830	0.558797	95727	33.1395	9975	0.124243
574	X	2	4	32	9.32	9.92	1611	2.20664	8675	0.451192	1851340	73.4858	69149	0.704093	16922	0.636833	24662	0.396289	61798	22.0425	5968	0.0765883
574	X	2	4	34	9.34	9.94	1382	2.22771	7778	0.476076	1559990	72.8714	60944	0.730283	14268	0.631906	23155	0.437869	53702	22.542	5476	0.0827014
574	X	2	4	36	9.36	9.96	2636	3.60241	8002	0.415243	1597810	63.2783	107737	1.09451	25973	0.975232	36214	0.580593	84156	29.9491	8169	0.104596
574	X	2	4	38	9.38	9.98	2753	3.30588	10107	0.46085	1874780	65.2399	115772	1.03346	27548	0.908885	38822	0.546897	90824	28.4009	9175	0.103225
574	X	2	4	40	9.4	10	3079	3.89606	10789	0.518387	1658450	60.8137	124200	1.16828	28543	0.992325	40352	0.599003	96794	31.8945	9930	0.117724
574	X	2	4	42	9.42	10.02	3567	4.87197	13473	0.698751	1368510	54.1666	148796	1.51078	33655	1.26296	63534	1.01802	102100	36.3144	12232	0.15653
574	X	2	4	44	9.44	10.04	2969	4.93038	14021	0.88411	1062690	51.1399	151172	1.86617	30814	1.40591	88246	1.71915	87548	37.8589	12566	0.195509
574	X	2	4	46	9.46	10.06	3173	5.38761	10526	0.678651	1083890	53.3326	130137	1.64261	27939	1.30339	24699	0.491987	83683	37.0011	10185	0.162026
574	X	2	4	54	9.54	10.14	3055	5.52804	13092	0.899544	926223	48.5689	145743	1.96045	31123	1.54732	25648	0.544454	86496	40.7575	11433	0.193829
574	X	2	4	56	9.56	10.16	3889	6.4479	12917	0.813203	956197	45.9421	157850	1.94551	33967	1.54731	13811	0.268629	99240	42.8468	12136	0.188519
574	X	2	4	58	9.58	10.18	3541	5.4554	8853	0.517902	1161360	51.8503	132044	1.51227	30844	1.3056	4215	0.0761809	97552	39.1371	10064	0.145268
574	X	2	4	60	9.6	10.2	3359	5.28212	5669	0.338502	1197840	54.5859	134032	1.56681	30050	1.29832	4096	0.0755625	89659	36.715	9352	0.137785
574	X	2	4	62	9.62	10.22	3302	5.27784	12007	0.728736	1146370	53.0989	135774	1.61326	29601	1.29994	15294	0.286779	90184	37.537	10514	0.157451
574	X	2	4	64	9.64	10.24	3312	5.56924	11817	0.754518	1031820	50.2795	145915	1.82395	31232	1.44292	21957	0.433138	90266	39.5258	10851	0.170952
574	X	2	4	66	9.66	10.26	3290	5.28677	13432	0.819581	1111390	51.754	140200	1.67475	30720	1.35629	23284	0.438935	91989	38.493	11731	0.176615
574	X	2	4	68	9.68	10.28	2625	4.1466	11839	0.710125	1297690	59.4042	111675	1.31138	26315	1.1421	41686	0.772504	78701	32.3739	9407	0.139223
574	X	2	4	70	9.7	10.3	2758	4.28261	11362	0.669924	1281820	57.6796	116910	1.3495	27535	1.17473	43221	0.787329	83879	33.9171	9568	0.139198
574	X	2	4	72	9.72	10.32	3065	4.6454	11253	0.647616	1226490	53.8689	128774	1.45087	29700	1.23677	38765	0.689255	94537	37.3118	10525	0.149456
574	X	2	4	74	9.74	10.34	3775	5.27596	11946	0.633962	1354680	54.8661	132251	1.37402	31530	1.21073	43833	0.718676	98297	35.7747	11141	0.145884
574	X	2	4	76	9.76	10.36	2785	3.78414	11054	0.570319	1616680	63.6574	107016	1.08093	25555	0.954016	38097	0.607268	82608	29.2291	9183	0.116903
574	X	2	4	78	9.78	10.38	2466	3.48455	10087	0.541217	1603670	65.6675	102679	1.07856	23958	0.930126	18937	0.313915	75742	27.8703	8602	0.113881
574	X	2	4	80	9.8	10.4	2526	3.27	10167	0.499763	1776370	66.6395	100007	0.962395	23365	0.831033	13533	0.205521	81549	27.4906	8344	0.101201
574	X	2	4	82	9.82	10.42	2476	3.48919	8263	0.442149	1616920	66.0307	99750	1.04495	21386	0.828022	15939	0.263501	75757	27.8002	7671	0.10128
574	X	2	4	84	9.84	10.44	3067	3.79456	12914	0.606688	1785750	64.0254	106768	0.981969	26541	0.902202	16392	0.237918	91070	29.341	9517	0.110318
574	X	2	4	86	9.86	10.46	3509	4.34024	11773	0.552936	1692960	60.6821	120878	1.11144	29093	0.988684	26788	0.388704	98775	31.8148	10451	0.121112
574	X	2	4	88	9.88	10.48	2908	3.38269	11595	0.512148	1912800	64.4792	109354	0.945608	26808	0.856783	22527	0.307411	97123	29.4199	8833	0.0962663
574	X	2	4	90	9.9	10.5	2933	3.54118	11790	0.540514	1830350	64.0402	119224	1.07006	25324	0.840053	28476	0.403332	93690	29.4565	9563	0.108175
574	X	2	4	92	9.92	10.52	3073	3.6788	12861	0.584622	1803990	62.5837	117056	1.04171	27337	0.899151	33545	0.471106	98257	30.6308	9813	0.110064
574	X	2	4	94	9.94	10.54	2731	3.56616	12600	0.624749	1668460	63.1362	109667	1.06454	25853	0.92753	33879	0.518988	88351	30.0429	9724	0.118966
574	X	2	4	96	9.96	10.56	2827	3.66157	11274	0.554468	1662750	62.4097	105035	1.01131	24003	0.854172	36432	0.55357	91489	30.8576	8049	0.0976746
574	X	2	4	98	9.98	10.58	2580	3.15014	8616	0.39946	1903890	67.3652	100022	0.907852	23411	0.785361	20285	0.290558	84964	27.0145	7596	0.0868948
574	X	2	4	100	10	10.6	2764	3.35711	11653	0.53743	1803840	63.4906	111114	1.00324	25917	0.864869	28886	0.411588	95596	30.2356	8752	0.0995939
574	X	2	4	102	10.02	10.62	3491	4.3939	12878	0.615468	1660540	60.5667	116706	1.09195	27387	0.947073	34461	0.508834	96902	31.7603	9816	0.115753
574	X	2	4	106	10.06	10.66	2831	3.50754	11177	0.52583	1792530	64.3595	118456	1.09101	25488	0.867635	32906	0.478284	90005	29.039	11308	0.131264
574	X	2	4	108	10.08	10.68	3466	4.01883	9564	0.421083	1853440	62.2778	121331	1.04581	27871	0.887897	41795	0.568517	101565	30.6667	10434	0.11335
574	X	2	4	112	10.12	10.72	3551	4.4681	13848	0.661631	1578520	57.558	132972	1.24377	30804	1.06492	18615	0.274779	105626	34.6094	10126	0.119374
574	X	2	4	114	10.14	10.74	3280	4.39606	11456	0.583015	1482710	57.5876	127114	1.26646	29118	1.07223	12055	0.189542	99651	34.7795	10001	0.125583
574	X	2	4	116	10.16	10.76	3057	4.27687	11644	0.61857	1411940	57.2441	134819	1.40214	28348	1.08966	12483	0.204879	96133	35.0231	10738	0.140751
574	X	2	4	118	10.18	10.78	2331	2.84385	5575	0.258266	1917800	67.8035	95280	0.864123	22584	0.757015	27931	0.39976	84968	26.9943	6931	0.0792244
574	X	2	4	120	10.2	10.8	3299	4.58916	12925	0.682712	1356920	54.7002	136839	1.41504	30684	1.17274	19645	0.32059	102079	36.9776	10899	0.142048
574	X	2	4	122	10.22	10.82	3430	4.31687	13720	0.65567	1626750	59.3305	131356	1.22895	29827	1.03139	17324	0.255782	100846	33.051	11014	0.129873
574	X	2	4	124	10.24	10.84	3366	4.38761	14343	0.709923	1463870	55.2967	146960	1.42404	32568	1.16639	28859	0.44131	107331	36.4327	11578	0.141399
574	X	2	4	126	10.26	10.86	3303	4.24302	14616	0.712938	1584230	58.9749	134590	1.28525	29208	1.03088	36484	0.549815	98849	33.0666	11343	0.136519
574	X	2	4	128	10.28	10.88	3534	4.43385	12668	0.603502	1534330	55.7847	143334	1.33682	32701	1.12723	44362	0.65294	109990	35.9351	10707	0.125858
574	X	2	4	130	10.3	10.9	3574	4.51302	14037	0.673044	1583580	57.9474	134664	1.26407	29972	1.03984	39610	0.586766	102921	33.8429	11237	0.132942
574	X	2	4	132	10.32	10.92	3048	3.9023	12907	0.627462	1602450	59.4528	128343	1.22148	28302	0.995546	39139	0.587845	99270	33.096	9725	0.116652
574	X	2	4	134	10.34	10.94	3088	4.02731	12648	0.62635	1562050	59.0358	119801	1.16147	27490	0.985034	41420	0.633718	98345	33.3996	10693	0.130658
574	X	2	4	136	10.36	10.96	3244	4.27929	14185	0.71052	1558630	59.5821	116930	1.14663	26747	0.969402	41058	0.635384	94782	32.5587	9539	0.117894
574	X	2	4	138	10.38	10.98	3231	4.23005	13355	0.66391	1538400	58.366	124565	1.21231	27409	0.985917	40620	0.623873	99117	33.7916	10302	0.126365
574	X	2	4	140	10.4	11	3172	3.8656	12063	0.558208	1685440	59.5224	121953	1.1048	28369	0.949874	42686	0.610263	104846	33.2726	10176	0.116187
574	X	2	4	144	10.44	11.04	3671	4.64589	15624	0.750816	1476360	54.1452	136817	1.28716	30377	1.05625	49850	0.740112	112991	37.2374	11563	0.137105
574	X	2	4	146	10.46	11.06	3778	5.41032	11366	0.618052	1224770	50.8275	123082	1.31028	27914	1.0983	34867	0.585765	107274	40.0043	10842	0.145468
574	X	2	4	148	10.48	11.08	3292	5.46432	8847	0.557608	1015160	48.8306	118037	1.45647	25594	1.16722	18097	0.352395	97224	42.0243	9459	0.147102
574	X	2	5	2	10.52	11.12	4173	5.7673	15829	0.830682	1144470	45.8364	161708	1.66136	34151	1.29678	52670	0.853956	121114	43.5883	12755	0.165159
574	X	2	5	4	10.54	11.14	3464	4.6281	12244	0.621162	1413510	54.7276	128272	1.27399	28613	1.05033	28791	0.451263	106684	37.1172	10413	0.130346
574	X	2	5	6	10.56	11.16	3853	5.03454	12197	0.60516	1420620	53.7926	126097	1.22482	29846	1.07148	47156	0.722845	109988	37.4246	10127	0.123977
574	X	2	5	8	10.58	11.18	3630	4.91288	13070	0.671679	1344730	52.7408	133657	1.34471	30697	1.14147	46609	0.740026	108672	38.3	11706	0.148435
574	X	2	5	10	10.6	11.2	4810	5.51314	13605	0.592119	1566500	52.0317	141004	1.20142	33257	1.04731	52981	0.712396	129911	38.7749	11827	0.127007
574	X	2	5	12	10.62	11.22	3989	4.73746	11784	0.531412	1570560	54.0529	130463	1.1518	31275	1.02051	28366	0.39521	122860	37.9965	10264	0.114208
574	X	2	5	14	10.64	11.24	3730	4.72946	13720	0.660562	1451780	53.344	141180	1.33071	31398	1.09381	27786	0.413311	115993	38.2989	10876	0.129202
574	X	2	5	16	10.66	11.26	3489	4.25429	13414	0.621071	1599850	56.5311	135578	1.22892	30141	1.00977	33118	0.473738	112615	35.758	10773	0.123072
574	X	2	5	18	10.68	11.28	3864	4.7695	12394	0.580904	1634420	58.4631	126333	1.15921	28810	0.977052	27052	0.391727	104364	33.5458	9748	0.112733
574	X	2	5	20	10.7	11.3	3796	4.64415	11423	0.530661	1692150	59.9931	117817	1.07151	28257	0.949828	26434	0.379394	101453	32.3219	9552	0.10949
574	X	2	5	22	10.72	11.32	2958	3.52907	12294	0.556945	1869660	64.641	107129	0.950119	25641	0.840496	42891	0.600311	92667	28.7898	8251	0.0922289
574	X	2	5	24	10.74	11.34	2754	3.71433	12617	0.646144	1430210	55.8984	123296	1.23616	26590	0.985311	40213	0.636255	104669	36.7609	9691	0.122457
574	X	2	5	26	10.76	11.36	1765	1.75829	6569	0.248486	2721080	78.5543	65888	0.487934	15920	0.43574	25942	0.303178	70051	18.1724	4249	0.039658
574	X	2	5	28	10.78	11.38	2140	2.37302	6841	0.288047	2321330	74.5945	78089	0.643703	17999	0.54837	28785	0.374456	73120	21.1142	6136	0.0637486
574	X	2	5	30	10.8	11.4	1132	1.15993	4056	0.157812	2823340	83.8364	45102	0.343551	10253	0.288653	21357	0.256729	52186	13.9249	3335	0.032017
574	X	2	5	32	10.82	11.42	1037	1.12234	3668	0.150741	2695610	84.5442	38964	0.313485	9894	0.294208	18314	0.232528	47207	13.3046	3734	0.0378632
574	X	2	5	34	10.84	11.44	837	0.970007	2892	0.127264	2505300	84.1381	53510	0.460992	10186	0.324333	23857	0.324349	45126	13.6184	3363	0.0365153
574	X	2	5	36	10.86	11.46	701	0.859359	3528	0.164226	2377300	84.4546	42475	0.387078	10063	0.33894	20210	0.29065	42180	13.4652	3476	0.039924
574	X	2	5	38	10.88	11.48	1035	1.24379	4156	0.189644	2383750	83.0141	45383	0.405424	10980	0.362534	38668	0.545139	45370	14.198	3673	0.0413549
574	X	2	5	40	10.9	11.5	1500	1.83809	6911	0.321569	2109710	74.9172	70753	0.64451	17025	0.573194	57575	0.827672	65217	20.8108	5835	0.0669908
574	X	2	5	42	10.92	11.52	1591	1.90979	6058	0.276122	2162000	75.2063	71711	0.639897	16604	0.547604	47573	0.669921	66170	20.6837	5929	0.0666799
574	X	2	5	44	10.94	11.54	1837	2.16347	6008	0.268676	2160660	73.7415	77556	0.678995	18355	0.59393	38304	0.529218	71608	21.9612	5711	0.0630163
574	X	2	5	46	10.96	11.56	2852	3.6428	10992	0.533112	1716650	63.5404	105358	1.00037	23086	0.810163	107230	1.60675	86460	28.7576	9097	0.108863
574	X	2	5	48	10.98	11.58	2768	3.30669	10162	0.46096	1903910	65.9109	101325	0.899814	23587	0.774174	24551	0.344068	90688	28.2117	8200	0.0917782
574	X	2	5	50	11	11.6	2770	3.51878	12794	0.617128	1763180	64.9071	110074	1.03945	23990	0.8373	23634	0.352206	86520	28.6207	9021	0.107366
574	X	2	5	52	11.02	11.62	2485	3.49894	14382	0.768928	1488700	60.7435	122871	1.28608	25356	0.98091	12956	0.214007	88331	32.3873	9121	0.120324
574	X	2	5	54	11.04	11.64	2390	2.69685	9960	0.426751	2193300	71.7199	86315	0.724024	19029	0.589946	16268	0.215348	80169	23.5568	6660	0.0704094
574	X	2	5	56	11.06	11.66	1675	1.84634	7646	0.320029	2434510	77.7663	72192	0.591556	14547	0.440565	18977	0.245399	65268	18.7348	5321	0.0549527
574	X	2	5	58	11.08	11.68	1060	1.23311	6844	0.302317	2376720	80.123	64100	0.554322	13308	0.42535	30374	0.41452	55748	16.8879	5458	0.0594877
574	X	2	5	60	11.1	11.7	1387	1.80731	10640	0.526446	2032640	76.7536	74652	0.723112	14705	0.526452	26594	0.406525	56547	19.1874	5661	0.069111
574	X	2	5	62	11.12	11.72	1599	1.71718	6394	0.260733	2571030	80.0124	63202	0.504553	15307	0.451644	26276	0.331035	59632	16.6762	4596	0.046243
574	X	2	5	64	11.14	11.74	1904	2.14968	8684	0.372292	2271340	74.3142	77122	0.647284	18246	0.565996	43287	0.573341	72460	21.3038	6936	0.0733694
574	X	2	5	66	11.16	11.76	1417	1.56393	8775	0.367749	2411620	77.1327	66965	0.54942	14716	0.446247	22375	0.289707	68150	19.5869	6131	0.0633982
574	X	2	5	68	11.18	11.78	1744	1.90839	7577	0.314829	2403820	76.2265	76836	0.62502	16553	0.497663	21341	0.273957	70536	20.0994	5292	0.0542548
574	X	2	5	70	11.2	11.8	2633	2.86298	8925	0.368495	2286380	72.0441	87003	0.70325	20404	0.609566	25657	0.327281	81258	23.0083	7461	0.0760085
574	X	2	5	72	11.22	11.82	1271	1.26119	7179	0.270493	2816000	80.975	60512	0.44636	13398	0.36527	31885	0.371167	62946	16.265	4890	0.0454613
574	X	2	5	74	11.24	11.84	1193	1.33161	7399	0.313594	2505260	81.0352	58160	0.482582	12881	0.395026	26360	0.345168	55231	16.0536	4138	0.0432739
574	X	2	5	76	11.26	11.86	1245	1.3626	6290	0.261401	2577020	81.7339	52955	0.43084	12380	0.372271	35381	0.454275	53837	15.3438	3992	0.0409345
574	X	2	5	78	11.28	11.88	1348	1.35108	5575	0.212174	2805910	81.4978	58982	0.439458	13726	0.377983	30474	0.358316	60220	15.7174	4878	0.0458068
574	X	2	5	80	11.3	11.9	1603	1.66205	5343	0.210355	2628830	78.9869	64077	0.493879	16800	0.478583	35648	0.433604	65491	17.6825	5371	0.0521751
574	X	2	5	82	11.32	11.92	1316	1.37276	5004	0.198204	2643560	79.9119	65002	0.504051	15081	0.432222	19377	0.237123	63664	17.2935	5139	0.0502245
574	X	2	5	84	11.34	11.94	2440	2.73561	6883	0.293021	2204900	71.637	90875	0.757387	22908	0.705652	35762	0.470364	79893	23.3252	7216	0.0757983
574	X	2	5	86	11.36	11.96	3068	3.71076	8817	0.404934	1831400	64.1907	109908	0.9882	27600	0.91718	18630	0.264343	93400	29.4175	9391	0.106418
574	X	2	5	88	11.38	11.98	4641	6.03749	9145	0.451737	1317660	49.674	156358	1.51208	37172	1.32862	7040	0.10744	120235	40.7312	12914	0.1574
574	X	2	5	90	11.4	12	4032	5.57717	9429	0.49524	1329060	53.2748	139478	1.43419	32150	1.22184	9364	0.151951	104700	37.713	10167	0.13176
574	X	2	5	92	11.42	12.02	5071	7.35318	13219	0.727841	958178	40.2634	186039	2.00537	40986	1.63288	8444	0.143641	126240	47.6683	15116	0.20536
574	X	2	5	94	11.44	12.04	5599	8.75282	14706	0.872949	670747	30.3864	218266	2.53648	47042	2.02051	5042	0.0924673	135305	55.0811	17566	0.257281
574	X	2	5	96	11.46	12.06	5556	8.71396	13632	0.811838	688009	31.2702	207697	2.42154	44969	1.93778	4126	0.0759155	133507	54.5266	16480	0.242163
574	X	2	5	98	11.48	12.08	4745	6.80657	12179	0.663377	1005480	41.7974	181015	1.93026	39557	1.55903	3323	0.0559204	125822	47.0003	13929	0.187202
574	X	2	5	100	11.5	12.1	5195	8.24404	10860	0.654397	750823	34.5283	193507	2.28276	41500	1.80943	3196	0.0594989	126344	52.2108	14175	0.210754
574	X	2	5	102	11.52	12.12	4780	7.41372	11004	0.64806	884916	39.7734	182726	2.10677	39046	1.66388	3674	0.066849	119171	48.1316	13467	0.195694
574	X	2	5	104	11.54	12.14	5615	8.433	13561	0.773359	711652	30.973	228944	2.55606	48140	1.98645	3258	0.0574026	140567	54.9753	17446	0.245486
574	X	2	5	106	11.56	12.16	4889	6.42471	16276	0.812153	1196900	45.58	186079	1.81777	41385	1.49422	3438	0.0530014	127532	43.6419	14309	0.176174
574	X	2	5	108	11.58	12.18	4141	5.48852	16795	0.845253	1340950	51.5046	164006	1.61591	35674	1.29909	5204	0.0809161	113020	39.0082	12678	0.157434
574	X	2	5	110	11.6	12.2	4805	5.83616	15964	0.736262	1409190	49.6007	167583	1.51312	39328	1.31242	10192	0.145225	128672	40.6976	13929	0.158508
574	X	2	5	112	11.62	12.22	4043	4.98852	15922	0.745972	1477690	52.8366	154928	1.42104	36590	1.24042	10880	0.157487	119709	38.4633	12685	0.146642
574	X	2	5	114	11.64	12.24	4551	5.19968	15398	0.668022	1694190	56.0938	146972	1.24828	34588	1.08576	10789	0.14461	119109	35.4377	11408	0.122117
574	X	2	5	116	11.66	12.26	4118	4.73014	13750	0.599719	1799840	59.9109	131599	1.1237	31010	0.978652	10543	0.142069	108327	32.4023	10451	0.112472
574	X	2	5	118	11.68	12.28	3556	3.95844	10630	0.449317	2025750	65.3478	114189	0.944921	26836	0.820765	10258	0.133959	97470	28.2543	8678	0.0905067
574	X	2	5	120	11.7	12.3	4026	4.48502	11327	0.47914	1903050	61.436	122709	1.01619	30350	0.92894	15124	0.197654	108090	31.3565	9632	0.100532
574	X	2	5	122	11.72	12.32	3115	3.62088	10577	0.466848	1947040	65.5865	105308	0.909969	26270	0.838987	12373	0.168725	93546	28.3161	8448	0.0920044
574	X	2	5	124	11.74	12.34	3145	3.73875	9270	0.418449	1883210	64.8767	103991	0.91899	25417	0.830173	10219	0.142516	93621	28.9822	8283	0.0922554
574	X	2	5	126	11.76	12.36	2984	3.45927	9645	0.424565	1970750	66.2064	99120	0.854192	24277	0.773248	13221	0.179803	92819	28.0204	7564	0.0821553
574	X	2	5	128	11.78	12.38	3244	3.7317	10923	0.477117	1944220	64.8118	108644	0.929054	25153	0.794977	14067	0.189835	96717	28.9721	8665	0.0933884
574	X	2	5	130	11.8	12.4	3084	3.57686	14293	0.62946	1937510	65.1201	116089	1.00089	25863	0.824148	20954	0.285104	94163	28.4394	11418	0.124073
574	X	2	5	132	11.82	12.42	2786	3.17522	11832	0.512045	2017540	66.6344	109492	0.92765	24123	0.755376	19041	0.254584	93072	27.6225	11063	0.118131
574	X	2	5	134	11.84	12.44	2440	2.71466	9704	0.409952	2163270	69.746	94172	0.778854	21282	0.650544	19045	0.248573	87592	25.3771	7128	0.0743005
574	X	2	6	2	12.02	12.62	3064	4.52629	9439	0.529463	1304810	55.8577	114925	1.26205	25569	1.03778	20231	0.350605	94388	36.3096	9143	0.126544
574	X	2	6	4	12.04	12.64	2754	3.39297	9156	0.42833	1828820	65.2934	91774	0.840513	22848	0.773397	31863	0.460522	89515	28.7186	7991	0.0922391
574	X	2	6	6	12.06	12.66	2078	2.58128	9024	0.425642	1973160	71.0286	73832	0.681777	18033	0.615454	34438	0.501851	74463	24.0869	6743	0.0784766
574	X	2	6	8	12.08	12.68	1504	2.01734	6941	0.353517	1908820	74.1959	65359	0.651697	16462	0.60667	35792	0.563204	61671	21.5409	5629	0.0707394
574	X	2	6	10	12.1	12.7	1676	2.74061	5991	0.371988	1509080	71.5104	54309	0.660167	12061	0.54187	22633	0.434173	55588	23.6704	4597	0.0704281
574	X	2	6	12	12.12	12.72	1813	2.17195	8217	0.373784	2157510	74.901	68580	0.610741	16344	0.537957	33422	0.469712	66885	20.8656	6167	0.0692187
574	X	2	6	14	12.14	12.74	1898	2.19275	7342	0.32208	2286830	76.5613	69022	0.592773	14854	0.471492	41764	0.566033	63928	19.2325	5644	0.061091
574	X	2	6	16	12.16	12.76	1888	2.21595	5653	0.251938	2235060	76.0202	67537	0.589262	14345	0.46259	28750	0.395862	65442	20.0016	5691	0.0625813
574	X	2	6	18	12.18	12.78	2414	2.51415	8401	0.332232	2417040	72.949	80321	0.621858	17764	0.508315	34329	0.419433	83265	22.5823	7454	0.0727346
574	X	2	6	20	12.2	12.8	1509	1.66825	7317	0.307157	2406860	77.1091	70738	0.581343	14444	0.438729	31383	0.407017	67452	19.4186	6748	0.0698947
574	X	2	6	22	12.22	12.82	1133	1.23668	5574	0.231022	2520380	79.7219	61821	0.501618	12287	0.368479	27523	0.352429	61651	17.5235	6293	0.0643553
574	X	2	6	24	12.24	12.84	1627	1.62151	5017	0.18986	2720920	78.5836	72968	0.540597	15366	0.420757	21391	0.250099	70601	18.3229	7569	0.0706755
574	X	2	6	26	12.26	12.86	2404	2.47547	5950	0.232647	2517240	75.1159	84836	0.6494	17063	0.482745	16951	0.20477	77434	20.7638	7800	0.0752517
574	X	2	6	28	12.28	12.88	1934	1.9867	8330	0.324921	2534050	75.4352	82815	0.632402	18258	0.515308	28831	0.347443	77295	20.6766	8469	0.081509
574	X	2	6	30	12.3	12.9	2300	2.34814	6525	0.25295	2493820	73.7809	86325	0.655152	19191	0.53831	31225	0.373979	82579	21.9542	10073	0.0963505
574	X	2	6	32	12.32	12.92	2462	2.58299	10166	0.404988	2360710	71.7729	93416	0.72856	20256	0.583885	36245	0.446099	85585	23.3822	10010	0.0983938
574	X	2	6	34	12.34	12.94	3140	3.58441	10916	0.473161	1885320	62.3673	120809	1.02517	24058	0.754547	32193	0.431119	105114	31.2464	11018	0.117839
574	X	2	6	36	12.36	12.96	2778	3.04434	11762	0.489439	2025470	64.3235	112849	0.91932	23600	0.710576	50315	0.646853	104249	29.7498	11318	0.116206
574	X	2	6	38	12.38	12.98	2887	3.36675	9641	0.426916	1851710	62.5778	110851	0.960975	23530	0.753918	49368	0.675394	102542	31.1399	9007	0.0984107
574	X	2	6	40	12.4	13	2537	2.85063	11101	0.47363	1929400	62.8242	107413	0.897194	23664	0.730546	119312	1.57272	104424	30.5543	9195	0.096799
574	X	2	6	42	12.42	13.02	3485	3.78296	12045	0.49647	1895560	59.6279	127826	1.03147	27556	0.821833	82666	1.0527	116993	33.0705	11428	0.116224
574	X	2	6	44	12.44	13.04	3056	3.34085	9027	0.374718	1975290	62.5776	110608	0.898875	24028	0.721705	58952	0.756049	109703	31.2301	9775	0.10012
574	X	2	6	46	12.46	13.06	3420	3.88309	6531	0.281571	1858140	61.1384	115749	0.976962	24335	0.759139	38927	0.518502	109393	32.3439	9253	0.0984311
574	X	2	6	48	12.48	13.08	3326	3.7996	11065	0.479981	1843860	61.0417	119142	1.01179	26480	0.831136	82582	1.10675	106278	31.6163	10537	0.11278
574	X	2	6	50	12.5	13.1	3126	3.65159	10880	0.48259	1873690	63.4268	115201	1.00036	24473	0.78545	61643	0.844742	97581	29.6831	11453	0.125346
574	X	2	6	52	12.52	13.12	3330	3.73136	9444	0.401824	1809000	58.7413	129217	1.07635	28425	0.875109	42214	0.554917	118236	34.5004	11305	0.118684
574	X	2	6	54	12.54	13.14	3394	3.72316	9074	0.377969	1922280	61.1083	123544	1.00747	28586	0.861573	84297	1.08483	111049	31.7224	11122	0.114309
574	X	2	6	56	12.56	13.16	3116	3.40952	9482	0.39396	2038230	64.6298	117185	0.953183	26895	0.808547	59421	0.762752	101512	28.9244	11498	0.117873
574	X	2	6	58	12.58	13.18	3552	4.00219	9682	0.414235	1894490	61.8585	127662	1.06929	27527	0.852163	57473	0.759691	105394	30.9238	11378	0.120113
574	X	2	6	60	12.6	13.2	2986	3.53078	9896	0.444322	1791020	61.3713	121444	1.06749	26551	0.862582	65610	0.91012	102973	31.707	9597	0.10632
574	X	2	6	62	12.62	13.22	3448	4.08807	9080	0.408784	1778250	61.098	124449	1.09686	27114	0.883249	54918	0.76386	102187	31.5499	10014	0.111239
574	X	2	6	64	12.64	13.24	2985	4.23001	8968	0.482557	1430300	58.7365	113241	1.19291	23240	0.904838	49501	0.822921	90802	33.5076	9238	0.122651
574	X	2	6	70	12.7	13.3	2309	3.745	7297	0.449396	1330110	62.5169	91817	1.10703	20846	0.928944	40534	0.771251	71926	30.3785	6778	0.102998
574	X	2	6	72	12.72	13.32	2633	3.70061	7155	0.381847	1557650	63.4418	88343	0.923004	22083	0.852745	32776	0.540414	82186	30.0796	6074	0.0799826
574	X	2	6	74	12.74	13.34	2510	3.65825	6852	0.379205	1463320	61.8049	88415	0.957931	21376	0.855982	34758	0.594295	83428	31.6638	6271	0.0856317
574	X	2	6	78	12.78	13.38	1026	1.98389	3762	0.276214	1315800	73.7299	50198	0.721548	10975	0.583059	20026	0.454268	44102	22.2065	2467	0.0446928
574	X	2	6	80	12.8	13.4	1223	2.20832	3575	0.245114	1380540	72.2383	55744	0.748243	12569	0.623556	21367	0.452613	49828	23.4294	3220	0.0544741
574	X	2	6	82	12.82	13.42	1283	2.34381	2806	0.194644	1395270	73.8646	50278	0.682784	11132	0.558738	21402	0.458668	45947	21.8577	2278	0.0389896
574	X	2	6	84	12.84	13.44	1455	2.72882	4064	0.289416	1283420	69.753	57300	0.798868	11860	0.611132	22552	0.496186	51736	25.2671	3158	0.0554909
574	X	2	6	86	12.86	13.46	1554	2.94298	5306	0.381558	1167470	64.0716	71705	1.00947	15006	0.780799	19466	0.432475	61459	30.3091	4059	0.07202
574	X	2	6	88	12.88	13.48	2116	3.91537	6681	0.469413	1078840	57.8489	87515	1.20378	18451	0.938027	40576	0.880793	71907	34.6481	5515	0.0956094
574	X	2	6	90	12.9	13.5	2569	4.6879	6221	0.431053	1027600	54.3402	104075	1.41179	22177	1.11187	37762	0.808382	78066	37.096	6597	0.112787
574	X	2	6	92	12.92	13.52	2589	4.79072	6250	0.439143	1020480	54.7213	102706	1.41278	21924	1.11462	29233	0.634585	76320	36.7755	6424	0.111371
574	X	2	6	94	12.94	13.54	1989	3.78455	5646	0.407922	1097020	60.4893	82651	1.16906	17190	0.898656	20354	0.454335	65997	32.7005	5367	0.0956773
574	X	2	6	96	12.96	13.56	2176	3.7185	5081	0.329697	1272680	63.0245	84271	1.07052	18905	0.887613	22580	0.452669	68397	30.4367	4984	0.0797967
574	X	2	6	98	12.98	13.58	2028	3.55755	4447	0.296215	1161190	59.0295	79149	1.03214	17734	0.854729	9970	0.205176	76510	34.9505	4514	0.0741896
574	X	2	6	100	13	13.6	2325	3.92616	5074	0.325351	1312420	64.2245	81319	1.02081	18460	0.856476	23947	0.474399	66168	29.0968	4777	0.0755785
574	X	2	6	102	13.02	13.62	2214	3.75953	4598	0.296471	1288630	63.4115	81214	1.02517	19339	0.902253	17967	0.357914	68209	30.1612	5402	0.0859426
574	X	2	6	104	13.04	13.64	2561	4.42498	6645	0.435967	1171610	58.6633	94007	1.20745	21180	1.00546	46754	0.947694	73803	33.2068	6691	0.108316
574	X	2	6	106	13.06	13.66	2519	4.08293	5407	0.33278	1266370	59.4824	94323	1.1365	22022	0.980707	39515	0.75137	78531	33.1464	5718	0.0868333
574	X	2	6	108	13.08	13.68	2436	4.19259	6603	0.431523	1150150	57.3643	96374	1.23303	21084	0.997004	46879	0.946524	77486	34.728	6635	0.10699
574	X	2	6	110	13.1	13.7	2304	4.50484	7126	0.529053	1007350	57.0768	94069	1.36726	19484	1.04668	44895	1.02978	67416	34.325	6580	0.120537
574	X	2	6	112	13.12	13.72	2748	4.97533	6773	0.465632	1016240	53.3192	108430	1.45936	23419	1.16496	46868	0.995473	79538	37.5	7075	0.120013
574	X	2	6	114	13.14	13.74	2184	4.06303	6641	0.469124	1064470	57.3871	95816	1.32509	20714	1.05877	43172	0.94221	71481	34.629	7209	0.125652
574	X	2	6	116	13.16	13.76	2890	4.83451	7586	0.481864	1111800	53.8968	106882	1.32913	23532	1.08156	51689	1.01438	85483	37.2379	7900	0.123817
574	X	2	6	120	13.2	13.8	3189	4.92683	6356	0.372866	1176310	52.6646	113884	1.30793	26281	1.11556	30806	0.558336	96815	38.9499	7183	0.103972
574	X	2	6	122	13.22	13.82	3522	5.42292	6157	0.359973	1092610	48.7521	119756	1.37072	28141	1.19048	16100	0.290815	105997	42.5	7837	0.113056
574	X	2	6	124	13.24	13.84	2831	4.62074	7049	0.436873	1172690	55.4674	112402	1.36381	24001	1.07631	19460	0.372616	85994	36.5503	7321	0.111954
574	X	2	6	126	13.26	13.86	3141	4.84411	7970	0.466725	1293300	57.7998	103819	1.19023	23443	0.993339	21366	0.38656	85184	34.2102	7545	0.109019
574	X	2	6	128	13.28	13.88	3083	4.49995	8204	0.454691	1317090	55.7099	113702	1.2337	26368	1.05743	34909	0.59775	95578	36.3282	8661	0.118441
574	X	2	6	130	13.3	13.9	3028	4.28141	8154	0.437782	1421530	58.2464	109041	1.14612	25725	0.999365	34687	0.575367	92883	34.1994	8617	0.114152
574	X	2	6	132	13.32	13.92	3671	5.32703	9045	0.498386	1267540	53.302	118771	1.28121	28246	1.12615	35642	0.606751	99864	37.7365	8971	0.121966
574	X	2	6	134	13.34	13.94	3224	4.92157	8670	0.502556	1224250	54.1578	116015	1.31653	26685	1.11922	42802	0.766515	93312	37.0935	8554	0.122342
574	X	2	6	136	13.36	13.96	2704	4.53674	8519	0.542729	1148350	55.8334	96428	1.20268	22389	1.03207	46529	0.915817	81980	35.8176	7568	0.118964
574	X	2	6	138	13.38	13.98	2672	5.1694	7229	0.531054	884985	49.6161	109472	1.5744	22754	1.20948	29902	0.678659	81551	41.0851	7497	0.13589
574	X	2	6	142	13.42	14.02	4208	5.19079	10612	0.497063	1461720	52.2522	128951	1.18247	31738	1.07566	41652	0.602755	121641	39.0741	10813	0.124969
574	X	2	6	144	13.44	14.04	4004	5.24133	10067	0.500385	1370300	51.9814	137115	1.33426	31728	1.14111	49750	0.763991	114178	38.9208	9522	0.116781
574	X	2	7	2	13.52	14.12	3452	4.68019	9754	0.502148	1394550	54.7911	118931	1.19866	28234	1.05173	54135	0.86103	104226	36.7976	9250	0.117498
574	X	2	7	4	13.54	14.14	3242	4.30146	10188	0.513273	1484890	57.0926	111826	1.10295	26550	0.967846	54648	0.8506	101495	35.067	8385	0.104233
574	X	2	7	6	13.56	14.16	3628	4.70217	10448	0.514186	1479930	55.5846	120076	1.1569	26705	0.950959	47661	0.724672	107431	36.2587	8880	0.107831
574	X	2	7	8	13.58	14.18	4205	5.65861	11538	0.589564	1287680	50.2151	135669	1.35717	30033	1.1104	50726	0.800796	114573	40.1492	9452	0.11917
574	X	2	7	10	13.6	14.2	3131	4.34646	11345	0.598018	1357790	54.6222	123636	1.27587	26706	1.01859	48283	0.786312	102985	37.2288	9520	0.123819
574	X	2	7	12	13.62	14.22	3400	4.3478	12790	0.621038	1467650	54.3872	131831	1.25319	28861	1.01401	64386	0.965895	111977	37.2882	10238	0.12266
574	X	2	7	14	13.64	14.24	4233	5.319	14985	0.714982	1295370	47.1692	158694	1.48235	33361	1.15175	93677	1.3809	130326	42.6446	11656	0.137224
574	X	2	7	16	13.66	14.26	3771	5.41536	14241	0.776547	1132830	47.1433	141677	1.51244	29200	1.1521	99855	1.68224	112781	42.1753	10610	0.142753
574	X	2	7	18	13.68	14.28	4177	5.31626	11632	0.562151	1357710	50.0763	142455	1.34781	31269	1.09344	51320	0.76626	122825	40.708	10884	0.129786
574	X	2	7	20	13.7	14.3	4392	5.75624	15036	0.748283	1185620	45.0304	161973	1.57808	33923	1.22154	92931	1.42884	129148	44.0774	12965	0.159202
574	X	2	7	22	13.72	14.32	3609	4.69907	11295	0.558429	1445720	54.5496	131980	1.27744	28388	1.01554	42589	0.650534	109508	37.1298	9809	0.11966
574	X	2	7	24	13.74	14.34	4108	5.42522	11249	0.564102	1269570	48.5878	147076	1.4439	31675	1.14932	53589	0.830253	121694	41.8512	11981	0.148244
574	X	2	7	26	13.76	14.36	3733	4.93512	14106	0.708109	1347100	51.6088	139336	1.36934	29335	1.06553	64688	1.00325	113805	39.1789	10574	0.130972
574	X	2	7	28	13.78	14.38	5096	7.40282	16909	0.932701	673946	28.3711	206251	2.22727	42897	1.71212	190789	3.25139	147697	55.8716	16976	0.231048
574	X	2	7	36	13.86	14.46	5507	8.15934	17813	1.00215	689392	29.5998	216829	2.38817	43321	1.76351	48656	0.845715	145188	56.0173	16138	0.22402
574	X	2	7	38	13.88	14.48	5319	8.15441	16626	0.967848	634478	28.1879	211742	2.41312	42185	1.77688	51915	0.933691	143608	57.3314	16343	0.234743
574	X	2	7	40	13.9	14.5	4535	7.02556	14181	0.834195	792786	35.5912	191491	2.20526	37479	1.59525	20762	0.377329	129326	52.1724	13695	0.198776
574	X	2	7	44	13.94	14.54	5170	8.28646	11535	0.702026	629890	29.2568	164166	1.95601	34891	1.53649	11091	0.208544	138635	57.8633	12683	0.190458
574	X	2	7	46	13.96	14.56	5086	7.99353	10684	0.637606	594565	27.0797	178096	2.08077	35628	1.53848	4525	0.0834312	147561	60.3928	13152	0.193665
574	X	3	1	58	14.58	15.18	1850	3.25859	6235	0.417015	1299250	66.3182	89713	1.17469	19800	0.958213	17600	0.36368	59749	27.4057	6297	0.103918
574	X	3	1	60	14.6	15.2	1786	2.67005	6427	0.364841	1592870	69.0085	94503	1.05025	22463	0.922666	20233	0.354851	65575	25.5287	7153	0.10019
574	X	3	1	64	14.64	15.24	3333	4.37231	9418	0.469128	1641390	62.3978	134039	1.30712	28709	1.03474	28066	0.431921	87433	29.8677	9700	0.119219
574	X	3	1	66	14.66	15.26	3180	4.59584	9018	0.494886	1408250	58.9795	140799	1.51268	29789	1.18286	25923	0.439512	86771	32.6561	10238	0.138628
574	X	3	1	68	14.68	15.28	3010	4.50044	8857	0.502842	1359310	58.8967	138009	1.53393	29561	1.21435	24014	0.421212	84217	32.7898	10045	0.140714
574	X	3	1	70	14.7	15.3	3740	6.46719	9711	0.637624	929990	46.6021	178096	2.28932	36510	1.73458	27261	0.553011	92186	41.5107	12680	0.205429
574	X	3	1	72	14.72	15.32	3725	6.84376	11710	0.816925	783027	41.6896	212578	2.90332	39074	1.9724	25875	0.557695	94001	44.973	14131	0.243242
574	X	3	1	74	14.74	15.34	3786	6.67028	11607	0.776498	849527	43.3734	214799	2.81322	39860	1.92947	33178	0.685743	94847	43.5149	14323	0.236426
574	X	3	1	76	14.76	15.36	2229	3.27388	7302	0.40724	1526710	64.9818	115625	1.26245	24337	0.982105	29503	0.508354	74425	28.4657	8603	0.118386
574	X	3	1	78	14.78	15.38	2915	3.74661	8867	0.432747	1710330	63.7036	122543	1.17084	27910	0.985595	29894	0.450746	87860	29.4065	8586	0.103393
574	X	3	1	80	14.8	15.4	2472	3.2355	7537	0.374583	1751900	66.4485	110747	1.07754	24246	0.87191	30805	0.473001	80441	27.4171	8308	0.10188
574	X	3	1	82	14.82	15.42	2956	4.28806	8208	0.452117	1392030	58.5178	136946	1.47678	28473	1.13482	28768	0.489569	88697	33.5056	9953	0.135272
574	X	3	1	84	14.84	15.44	3100	4.41013	8066	0.435717	1421930	58.6208	130257	1.37753	28610	1.11827	28295	0.472223	90255	33.4359	9717	0.129515
574	X	3	1	86	14.86	15.46	3206	4.38038	8272	0.429156	1544600	61.1571	123085	1.25015	28075	1.05392	25864	0.414564	87684	31.1975	9160	0.117258
574	X	3	1	88	14.88	15.48	3051	4.12053	9221	0.472874	1548600	60.6083	126102	1.26602	28162	1.04499	28810	0.456459	90743	31.9135	9271	0.11731
574	X	3	1	92	14.92	15.52	2864	3.74462	9045	0.449056	1680710	63.6812	121405	1.18	27285	0.980162	28852	0.442547	86364	29.4049	9594	0.117526
574	X	3	1	94	14.94	15.54	3434	5.12832	9695	0.549768	1283010	55.5248	171332	1.90205	32708	1.34205	36327	0.636433	89355	34.7492	11961	0.167356
574	X	3	1	96	14.96	15.56	2174	2.91833	7208	0.367406	1790190	69.6396	133665	1.33383	24224	0.893427	28468	0.448311	69500	24.2947	8304	0.104438
574	X	3	1	98	14.98	15.58	3095	4.67064	10507	0.602076	1311310	57.3462	177172	1.98756	32931	1.3654	33221	0.588134	84636	33.26	12732	0.180016
574	X	3	1	100	15	15.6	1201	1.4208	4277	0.192126	2369220	81.223	69021	0.606989	14337	0.466002	18354	0.254724	51202	15.7736	5670	0.0628452
574	X	3	1	102	15.02	15.62	1692	2.26146	7805	0.396113	1896650	73.4615	102840	1.02179	22349	0.820703	27141	0.425562	61821	21.5168	7677	0.0961345
574	X	3	1	104	15.04	15.64	102	0.116609	2724	0.118249	2753470	91.2212	25945	0.220493	4047	0.127117	13475	0.180721	26847	7.99245	2165	0.0231894
574	X	3	1	106	15.06	15.66	756	0.895827	5528	0.248729	2483120	85.2675	63315	0.557722	11987	0.390257	19077	0.265192	39930	12.3212	4830	0.0536226
574	X	3	1	108	15.08	15.68	1626	2.27629	11934	0.634382	1774810	72.0018	113495	1.18112	20833	0.801305	29868	0.490526	61683	22.4866	9757	0.127974
574	X	3	1	110	15.1	15.7	1536	2.10092	12114	0.629161	1856190	73.5738	100856	1.02548	19236	0.722887	25065	0.402192	60232	21.4534	7191	0.092152
574	X	3	1	112	15.12	15.72	1456	1.96079	10239	0.52358	1959790	76.4822	88128	0.88225	16413	0.607289	24730	0.390698	54405	19.0792	5866	0.0740132
574	X	3	1	114	15.14	15.74	1744	2.37291	7966	0.411559	1822240	71.8494	81949	0.828873	18396	0.687697	28704	0.458169	65776	23.3053	6755	0.0861111
574	X	3	1	116	15.16	15.76	2202	3.63761	7039	0.441537	1276110	61.0902	107292	1.31758	20805	0.94429	38377	0.743735	73687	31.6987	8164	0.126357
574	X	3	1	118	15.18	15.78	2483	4.2775	8412	0.550261	1118680	55.8474	122624	1.57035	24929	1.17993	32481	0.656433	79702	35.7547	10122	0.163372
574	X	3	1	120	15.2	15.8	2944	4.81573	9113	0.566033	1116860	52.9427	127945	1.55581	26022	1.16951	42799	0.821307	89155	37.977	9911	0.151894
574	X	3	1	122	15.22	15.82	3528	6.6112	11991	0.853225	655598	35.6018	184512	2.57031	34235	1.76263	69539	1.52872	104137	50.8169	14539	0.255261
574	X	3	1	124	15.24	15.84	3667	6.37895	12253	0.809352	768908	38.7611	184922	2.39131	34386	1.64346	66438	1.35582	106907	48.4279	14243	0.232134
574	X	3	1	126	15.26	15.86	3597	6.1849	11564	0.755018	851243	42.4159	165197	2.11156	30600	1.44561	62059	1.25183	101843	45.6011	14531	0.234092
574	X	3	1	128	15.28	15.88	3584	5.88551	11762	0.733422	889228	42.3167	172096	2.10085	32240	1.45462	63424	1.22185	107754	46.0787	13539	0.208305
574	X	3	1	130	15.3	15.9	3013	4.46332	12760	0.717738	1153390	49.5128	147853	1.62816	27810	1.13187	41619	0.723266	107959	41.6456	12775	0.177304
574	X	3	1	132	15.32	15.92	2703	3.9655	12758	0.710708	1161460	49.3786	128819	1.40488	25041	1.00935	47506	0.817614	111399	42.5583	11277	0.155004
574	X	3	1	134	15.34	15.94	2759	4.30033	11630	0.688314	1049320	47.396	125136	1.44991	23357	1.00024	163987	2.99852	103446	41.9871	12299	0.179605
574	X	3	1	136	15.36	15.96	2824	4.25849	13792	0.789723	1020470	44.5937	136662	1.53196	25778	1.06802	181762	3.21545	112929	44.3453	13968	0.197344
574	X	3	1	138	15.38	15.98	2382	3.49605	13168	0.733858	1253140	53.2991	121806	1.32896	23565	0.950258	118068	2.0329	99389	37.9862	12563	0.172754
574	X	3	1	140	15.4	16	2482	3.93691	13308	0.801537	1022240	46.9881	140257	1.65382	24695	1.07622	111398	2.0729	104778	43.2788	12900	0.191709
574	X	3	1	142	15.42	16.02	2586	4.1809	12877	0.790519	944537	44.253	140456	1.68807	26248	1.16594	117654	2.23149	108118	45.5187	11311	0.171333
574	X	3	1	144	15.44	16.04	2430	3.95637	10766	0.665582	989516	46.687	126371	1.52949	23554	1.05364	63648	1.21569	105539	44.746	9585	0.146211
574	X	3	1	146	15.46	16.06	2001	3.94615	8756	0.655676	766963	43.8313	106323	1.5587	20686	1.12083	62668	1.44984	92060	47.2769	8693	0.160618
574	X	3	2	4	15.54	16.14	2819	4.91342	9816	0.649651	790014	39.9031	126553	1.63972	24476	1.17211	129321	2.64427	107766	48.9128	10101	0.16495
574	X	3	2	6	15.56	16.16	3398	5.72011	10742	0.68663	813251	39.6724	131668	1.64767	26223	1.21283	155982	3.08037	109095	47.823	9951	0.156944
574	X	3	2	8	15.58	16.18	3102	5.58444	12193	0.833499	627260	32.7241	141032	1.8874	27018	1.33638	212859	4.49549	112955	52.9535	10979	0.185182
574	X	3	2	10	15.6	16.2	3307	5.79409	12132	0.807124	623164	31.64	136815	1.78194	27101	1.30459	255266	5.24677	116708	53.248	10810	0.17745
574	X	3	2	12	15.62	16.22	3258	5.61297	11819	0.773178	685171	34.2077	144137	1.84598	27455	1.29958	148523	3.00181	118349	53.0955	10115	0.16327
574	X	3	2	14	15.64	16.24	3497	6.13722	11473	0.764557	628530	31.9658	152686	1.99197	29117	1.40398	106888	2.20066	121070	55.3304	12495	0.205452
574	X	3	2	16	15.66	16.26	4069	7.13212	11948	0.795213	539234	27.39	167808	2.18652	31050	1.49531	69905	1.43743	130022	59.3471	13174	0.216345
574	X	3	2	18	15.68	16.28	4054	6.9963	10229	0.670308	548738	27.4431	176757	2.26762	32731	1.55197	48312	0.978109	133284	59.8982	12023	0.1944
574	X	3	2	22	15.72	16.32	3727	7.05775	10361	0.745016	434164	23.8256	181116	2.5496	30600	1.59209	97503	2.16607	125410	61.843	12449	0.220871
574	X	3	2	24	15.74	16.34	4426	8.07035	10168	0.704001	380397	20.1002	184852	2.50561	33971	1.70187	89183	1.9077	136436	64.783	13300	0.227212
574	X	3	2	26	15.76	16.36	4144	7.5144	10413	0.71698	375960	19.756	182306	2.45745	31444	1.56657	76054	1.61787	140107	66.1585	12491	0.212212
574	X	3	2	28	15.78	16.38	4129	7.83734	11297	0.814223	329009	18.0973	183286	2.5862	33117	1.72708	101693	2.26445	134389	66.4261	13905	0.247282
574	X	3	2	32	15.82	16.42	3742	7.2557	11713	0.862383	379926	21.348	193121	2.78364	31893	1.69906	83683	1.90353	126567	63.9068	13258	0.240853
574	X	3	2	34	15.84	16.44	3559	7.37646	10517	0.827691	320007	19.2204	183030	2.82001	29949	1.70546	86051	2.0923	121781	65.7281	11826	0.229644
574	X	3	2	36	15.86	16.46	3824	7.39904	10781	0.792088	349863	19.6173	179176	2.57719	31320	1.66501	74717	1.696	131064	66.0378	11896	0.215654
574	X	3	2	38	15.88	16.48	3874	7.60303	10339	0.770482	323179	18.3803	179763	2.62262	31988	1.72485	92373	2.12677	130198	66.54	12613	0.231923
574	X	3	2	40	15.9	16.5	3600	6.82585	10230	0.736523	403339	22.1619	172564	2.43228	30003	1.56299	79136	1.76026	130200	64.286	13183	0.234189
574	X	3	2	42	15.92	16.52	3333	6.62504	10015	0.755894	387815	22.3388	170310	2.51653	27917	1.52461	67246	1.56808	124560	64.4738	10592	0.197256
574	X	3	2	44	15.94	16.54	3528	6.4719	9571	0.66668	515100	27.3828	164864	2.24822	28869	1.45504	38614	0.830991	127164	60.7462	11530	0.198167
574	X	3	2	46	15.96	16.56	3551	6.40759	9414	0.645023	557670	29.1611	163613	2.19468	29063	1.44086	57357	1.21417	125019	58.7451	11323	0.191427
574	X	3	2	48	15.98	16.58	4037	7.0259	10204	0.674327	492015	24.8144	176145	2.27888	31861	1.52349	66302	1.35368	137096	62.1326	12064	0.196713
574	X	3	2	50	16	16.6	3639	6.43112	9887	0.663477	483318	24.7526	172150	2.26162	30892	1.49999	64234	1.33173	136591	62.8606	12013	0.198909
574	X	3	2	52	16.02	16.62	4462	7.73156	9540	0.627686	441499	22.1692	181613	2.33934	33318	1.58619	74644	1.51733	141432	63.817	13041	0.211712
574	X	3	2	54	16.04	16.64	3876	6.78836	11483	0.763648	456718	23.1799	182116	2.37103	32828	1.57966	72374	1.487	139484	63.6146	13149	0.215761
574	X	3	2	56	16.06	16.66	4162	7.57431	11663	0.80595	384630	20.2846	192655	2.60633	34337	1.71689	75284	1.60728	137541	65.1815	13082	0.223056
574	X	3	2	58	16.08	16.68	4771	8.18162	12403	0.807632	411302	20.4397	202470	2.58107	36533	1.72129	70217	1.4126	144699	64.617	14881	0.239089
574	X	3	2	60	16.1	16.7	4745	8.08097	13030	0.842614	379704	18.7394	211651	2.67952	38489	1.80095	69775	1.39404	149276	66.2017	16348	0.26085
574	X	3	2	62	16.12	16.72	4820	8.26158	12167	0.791874	379438	18.8469	207813	2.64787	37397	1.76113	69049	1.38842	147998	66.0577	15229	0.24456
574	X	3	2	64	16.14	16.74	4722	8.03783	11687	0.755393	388987	19.1881	203792	2.57875	37474	1.75259	75175	1.50118	148784	65.9509	14756	0.235331
574	X	3	2	66	16.16	16.76	4191	7.83058	10980	0.778996	352115	19.0653	185504	2.57655	32844	1.68605	66266	1.4525	136431	66.3805	13111	0.229515
574	X	3	2	68	16.18	16.78	4033	7.3349	10641	0.734861	414393	21.8404	170261	2.30192	31702	1.58413	52499	1.12012	136960	64.8651	12827	0.218569
574	X	3	2	70	16.2	16.8	4817	8.32828	11585	0.760556	411348	20.6097	196097	2.52034	35846	1.70278	61260	1.24252	143486	64.601	14496	0.234815
574	X	3	2	72	16.22	16.82	3893	7.38527	11549	0.831923	377575	20.7572	187887	2.64964	32498	1.69386	52023	1.15778	132155	65.2855	13438	0.238844
574	X	3	2	74	16.24	16.84	3965	7.34561	10853	0.763469	401289	21.5439	178551	2.45898	32036	1.63065	82666	1.79663	133165	64.2431	12540	0.217661
574	X	3	2	76	16.26	16.86	3591	7.40243	10565	0.826961	394385	23.5593	175876	2.6951	28584	1.6189	62537	1.51232	115796	62.159	11704	0.226043
574	X	3	2	78	16.28	16.88	4484	7.44023	11498	0.724436	412513	19.8354	198847	2.45272	36721	1.67407	77014	1.49913	153087	66.1471	14598	0.226941
574	X	3	2	80	16.3	16.9	4655	7.90181	11902	0.767155	378283	18.6083	191324	2.41426	35230	1.64308	76262	1.51867	151406	66.927	13819	0.219777
574	X	3	2	82	16.32	16.92	4540	7.30402	13149	0.803258	451524	21.0508	206515	2.46982	36835	1.62819	78236	1.47659	155263	65.0467	14634	0.22058
574	X	3	2	84	16.34	16.94	4613	7.1877	13662	0.80831	517751	23.3782	201501	2.33396	37143	1.59009	97202	1.77676	154551	62.709	14796	0.215998
574	X	3	2	86	16.36	16.96	4551	6.7331	13278	0.745929	585546	25.1045	201673	2.21802	35492	1.4427	54670	0.948866	162511	62.6098	14216	0.197053
574	X	3	2	88	16.38	16.98	4098	5.05964	12815	0.600791	1331040	47.6235	152411	1.39886	30735	1.0426	5251	0.0760568	137060	44.0667	11403	0.131906
574	X	3	2	90	16.4	17	2866	4.12959	10001	0.547181	1263550	52.7601	118891	1.27347	23820	0.942999	4581	0.0774354	107050	40.167	7573	0.102234
574	X	3	2	92	16.42	17.02	2676	3.72784	10180	0.538487	1365370	55.1194	112926	1.16943	24154	0.924481	4655	0.0760743	105664	38.3309	8685	0.113354
574	X	3	2	94	16.44	17.04	3036	4.25831	10518	0.560177	1328300	53.99	115160	1.20073	24070	0.927577	4997	0.0822229	106416	38.8682	8582	0.112777
574	X	3	2	96	16.46	17.06	2676	4.204	10639	0.634649	1133000	51.5811	111319	1.30003	22114	0.954513	5090	0.0938084	100513	41.1197	7627	0.112261
574	X	3	2	98	16.48	17.08	3061	4.22196	11088	0.580711	1311040	52.4022	125763	1.28947	24844	0.941478	6218	0.100612	112338	40.3486	8900	0.115011
574	X	3	2	100	16.5	17.1	3707	4.74952	10983	0.534324	1333340	49.5051	133262	1.26924	28158	0.991214	5152	0.0774374	128145	42.7544	9898	0.118815
574	X	3	2	102	16.52	17.12	3454	4.63996	11665	0.595022	1261770	49.1195	130431	1.30251	26256	0.969078	4498	0.0708858	123428	43.1774	9978	0.125584
574	X	3	2	104	16.54	17.14	3748	4.56582	12206	0.56461	1303360	46.0116	145347	1.31624	29798	0.997342	5709	0.0815881	146055	46.3326	11405	0.13017
574	X	3	2	106	16.56	17.16	3804	4.78187	12698	0.606107	1098160	40.0042	142092	1.32781	27870	0.96257	5506	0.0811972	159191	52.1107	10661	0.125561
574	X	3	2	108	16.58	17.18	3439	4.74312	13618	0.713184	1051630	42.0319	145441	1.49117	28659	1.086	5232	0.0846539	138409	49.7104	10799	0.139545
574	X	3	2	110	16.6	17.2	3507	4.88524	14033	0.742263	1062710	42.8991	149136	1.54434	27785	1.06341	5993	0.0979361	134046	48.6246	10967	0.143132
574	X	3	2	112	16.62	17.22	4316	5.65424	14455	0.719064	1035350	39.3062	162087	1.57852	30527	1.09879	6436	0.0989137	150673	51.4019	11595	0.142319
574	X	3	2	114	16.64	17.24	4229	5.74376	13526	0.697565	960695	37.8118	156674	1.58185	30733	1.14684	6496	0.103503	149188	52.7648	11781	0.149913
574	X	3	2	116	16.66	17.26	3792	5.16485	13334	0.689614	1026080	40.4998	148034	1.49885	28310	1.05942	5768	0.0921642	143390	50.858	10760	0.137309
574	X	3	2	118	16.68	17.28	3739	5.32844	12592	0.681391	983612	40.6211	140255	1.48584	28104	1.1004	5493	0.0918337	136206	50.5466	10812	0.144361
574	X	3	2	120	16.7	17.3	3751	5.48618	12397	0.688488	934547	39.6102	141607	1.53963	28196	1.13305	5861	0.100564	134673	51.2926	10892	0.149255
574	X	3	2	122	16.72	17.32	3677	5.47335	12486	0.705732	934195	40.2977	135363	1.49785	27131	1.10959	5312	0.092761	130733	50.6753	10595	0.147761
574	X	3	2	124	16.74	17.34	3216	4.96567	11052	0.647977	926701	41.4653	121419	1.39366	25255	1.07139	4363	0.0790305	124941	50.2364	9720	0.140613
574	X	3	2	126	16.76	17.36	2940	4.72642	9988	0.609706	929787	43.3163	113811	1.36012	24082	1.06369	4728	0.0891683	116344	48.7058	8550	0.12878
574	X	3	2	130	16.8	17.4	2829	4.91019	9954	0.656024	837707	42.1348	115270	1.48727	23348	1.11341	4321	0.0879827	109437	49.4631	9059	0.147314
574	X	3	2	132	16.82	17.42	2544	4.47252	9675	0.645867	891206	45.4042	108151	1.41343	21343	1.03093	4272	0.0881078	102245	46.8089	8257	0.136005
574	X	3	2	134	16.84	17.44	2962	5.1321	9172	0.603436	925561	46.4727	112219	1.44539	23149	1.102	3581	0.0727884	99826	45.0407	8059	0.130825
574	X	3	2	136	16.86	17.46	2597	4.51576	8140	0.537453	983943	49.5807	100412	1.29794	21562	1.03012	4034	0.0822892	94583	42.8276	7868	0.12818
574	X	3	2	138	16.88	17.48	2385	4.17039	7599	0.504547	1014570	51.4107	97835	1.27172	20035	0.962534	3881	0.0796122	91092	41.4782	7469	0.122363
574	X	3	2	140	16.9	17.5	1640	4.14788	5102	0.489981	748711	54.8756	70672	1.32873	12670	0.880434	2715	0.0805563	57836	38.0918	4433	0.105046
574	X	3	2	142	16.92	17.52	393	1.93673	2609	0.488211	417929	59.6846	41616	1.52457	5357	0.725332	1543	0.0892053	27608	35.4294	2642	0.121985
574	X	3	3	2	17.02	17.62	1946	4.21687	6279	0.516648	882949	55.4454	87528	1.40995	15917	0.947648	3405	0.086559	66018	37.253	6103	0.123905
574	X	3	3	4	17.04	17.64	2777	4.02806	10195	0.561518	1394760	58.6279	113949	1.22868	23585	0.939927	5710	0.0971637	91072	34.3998	8606	0.116955
574	X	3	3	6	17.06	17.66	2494	3.77508	10345	0.594589	1335540	58.5827	111318	1.25257	22545	0.937601	5676	0.100791	87874	34.6371	8433	0.119594
574	X	3	3	8	17.08	17.68	2982	4.71305	8168	0.490193	1096280	50.2111	122281	1.43669	24378	1.0586	4347	0.0805994	101739	41.8729	9240	0.136825
574	X	3	3	10	17.1	17.7	2732	4.01413	8399	0.468592	1319980	56.2032	108240	1.18224	22561	0.910767	4962	0.0855293	96755	37.0199	8402	0.115662
574	X	3	3	12	17.12	17.72	2947	4.09272	8911	0.469911	1401070	56.3864	110932	1.14524	23803	0.908243	5773	0.0940549	101730	36.7902	8699	0.113188
574	X	3	3	14	17.14	17.74	2940	4.0869	10332	0.545365	1434360	57.7814	110425	1.1411	23805	0.909186	7042	0.114839	97530	35.305	8926	0.116252
574	X	3	3	16	17.16	17.76	3218	4.39785	11595	0.601703	1431290	56.6847	128698	1.30748	25981	0.975548	10332	0.165648	100431	35.7416	9799	0.125468
574	X	3	3	18	17.18	17.78	3262	4.35258	11421	0.57866	1481410	57.2824	131195	1.30133	26059	0.955342	10561	0.165316	101439	35.2468	9411	0.117651
574	X	3	3	20	17.2	17.8	3504	4.60498	13469	0.672134	1412150	53.7807	145318	1.41968	28002	1.01109	13631	0.210155	111492	38.1556	11826	0.145613
574	X	3	3	22	17.22	17.82	3556	4.87441	13931	0.725102	1270700	50.4763	153913	1.56835	29971	1.12876	19068	0.306629	114156	40.7484	13394	0.172016
574	X	3	3	24	17.24	17.84	3651	4.88404	15662	0.795557	1303380	50.5268	160738	1.59843	30696	1.1282	20218	0.317288	116472	40.5733	14077	0.176431
574	X	3	3	26	17.26	17.86	2810	3.65788	11872	0.586819	1569460	59.2046	111677	1.08068	21922	0.784046	14551	0.22221	101352	34.3563	8807	0.107411
574	X	3	3	28	17.28	17.88	2880	3.8728	10588	0.540634	1459410	56.8714	124201	1.24156	23923	0.883867	8492	0.133965	103791	36.3449	8802	0.110895
574	X	3	3	30	17.3	17.9	3626	4.73094	13214	0.654652	1435270	54.267	137122	1.32995	28068	1.00616	9594	0.146848	110977	37.7054	13013	0.159072
574	X	3	3	32	17.32	17.92	3390	4.20297	12323	0.580136	1583840	56.9053	137585	1.26805	27085	0.922623	10246	0.149025	111032	35.8473	10727	0.124604
574	X	3	3	34	17.34	17.94	3509	4.46036	9249	0.446415	1440970	53.0792	138743	1.31101	27803	0.970995	6651	0.0991794	119370	39.5124	10111	0.120415
574	X	3	3	36	17.36	17.96	3306	4.20918	10130	0.489735	1555690	57.3985	143394	1.35717	27706	0.969185	7346	0.109722	106587	35.3387	10714	0.127804
574	X	3	3	38	17.38	17.98	3606	4.75659	12457	0.623936	1336890	51.1034	153214	1.50237	30067	1.08968	6426	0.0994394	118400	40.6699	12519	0.154717
574	X	3	3	40	17.4	18	3469	4.72534	10914	0.564507	1303100	51.4389	150038	1.51928	30025	1.1237	5311	0.0848698	113899	40.4018	11101	0.141674
574	X	3	3	44	17.44	18.04	3160	4.05353	10983	0.534963	1590550	59.1257	141388	1.34824	28190	0.993527	10838	0.163096	100779	33.6641	9716	0.11677
574	X	3	3	46	17.46	18.06	2917	3.99735	10538	0.54834	1481520	58.8335	136375	1.38924	26219	0.987165	22568	0.362807	94589	33.7542	9928	0.127466
574	X	3	3	48	17.48	18.08	3167	4.7614	12778	0.729468	1044190	45.4933	159328	1.78069	29182	1.20542	19506	0.344035	116267	45.5192	11821	0.166509
574	X	3	3	50	17.5	18.1	3367	5.10322	12618	0.726187	1031700	45.3144	160495	1.8083	29307	1.22042	26319	0.46797	114512	45.1964	11486	0.163105
574	X	3	3	52	17.52	18.12	3104	4.73132	13164	0.761913	996609	44.0219	160749	1.82145	29917	1.2529	46322	0.828316	116924	46.4105	12025	0.171729
574	X	3	3	54	17.54	18.14	3403	5.04434	14170	0.79757	1002760	43.0746	163791	1.80485	30295	1.23382	47345	0.823311	121890	47.0502	12335	0.171309
574	X	3	3	56	17.56	18.16	3493	5.21825	14172	0.803922	1016890	44.0232	159729	1.77386	28710	1.17841	38769	0.679452	118632	46.1508	12295	0.172089
574	X	3	3	58	17.58	18.18	3351	5.03397	14479	0.825907	1010040	43.9703	164814	1.84051	29203	1.20532	47283	0.833276	117900	46.1213	12041	0.169472
574	X	3	3	60	17.6	18.2	3229	4.88854	13922	0.800331	993413	43.5837	166991	1.87937	29813	1.2401	46531	0.826421	118204	46.601	12732	0.180595
574	X	3	3	62	17.62	18.22	3243	4.82722	14338	0.810393	1011300	43.6227	167109	1.84909	29876	1.22183	44069	0.76954	120552	46.7279	12287	0.171354
574	X	3	3	64	17.64	18.24	3492	5.1974	14103	0.79704	981104	42.3165	174267	1.92813	31443	1.2858	51399	0.897458	122257	47.3846	13847	0.193093
574	X	3	3	66	17.66	18.26	3174	4.91252	13664	0.80303	957806	42.9593	165071	1.89923	29070	1.23618	41316	0.750176	117275	47.2665	11930	0.172996
574	X	3	3	68	17.68	18.28	3237	4.90085	13571	0.780184	989653	43.4205	163858	1.84419	29797	1.23948	37491	0.665892	119136	46.9703	12595	0.178659
574	X	3	3	70	17.7	18.3	3485	5.25876	13680	0.783833	990314	43.3049	165598	1.85757	29647	1.22914	35902	0.635546	118980	46.7526	12565	0.17764
574	X	3	3	72	17.72	18.32	3137	4.83337	13581	0.794556	954898	42.6359	169181	1.93774	29944	1.26761	36495	0.659655	118850	47.6855	12860	0.185641
574	X	3	3	74	17.74	18.34	3696	5.62426	13238	0.764914	939464	41.4282	174590	1.97497	31216	1.30512	42122	0.751952	121048	47.967	12876	0.183575
574	X	3	3	76	17.76	18.36	4140	5.82591	13423	0.717248	1009370	41.1622	172994	1.80968	33040	1.27744	40436	0.667543	131960	48.3567	13902	0.18329
574	X	3	3	78	17.78	18.38	3835	5.55926	12682	0.698065	1000660	42.0357	168309	1.81371	30752	1.22479	34750	0.590954	126910	47.907	12554	0.170503
574	X	3	3	80	17.8	18.4	3774	5.49382	13368	0.738917	1006760	42.4698	171562	1.85653	31480	1.25906	31216	0.533086	125228	47.4706	13065	0.178189
574	X	3	3	82	17.82	18.42	3641	5.25875	13181	0.722882	1021390	42.75	171244	1.8386	30919	1.22695	33885	0.574139	126177	47.4563	12744	0.172451
574	X	3	3	84	17.84	18.44	3291	4.87253	13128	0.738044	1026490	44.0417	166603	1.83366	30524	1.24167	32811	0.569894	120688	46.531	12363	0.171494
574	X	3	3	86	17.86	18.46	3704	5.41692	13487	0.748951	971016	41.152	177103	1.92538	32252	1.29591	41672	0.714946	127502	48.5568	13805	0.189154
574	X	3	3	88	17.88	18.48	3905	5.57489	14035	0.760825	1020460	42.2176	174900	1.85615	32481	1.27404	33197	0.555984	127957	47.5698	14258	0.190709
574	X	3	3	90	17.9	18.5	4383	6.15769	14250	0.760182	988079	40.2273	182159	1.90242	33227	1.28255	46471	0.765907	133154	48.7138	14451	0.190214
574	X	3	3	92	17.92	18.52	4123	5.79779	14685	0.784115	975779	39.7634	181862	1.90108	33948	1.3116	45056	0.743275	135210	49.5119	14185	0.186886
574	X	3	3	94	17.94	18.54	4179	5.90787	14969	0.803542	969230	39.7071	183842	1.93202	33193	1.28927	45514	0.754834	134181	49.3971	15722	0.20824
574	X	3	3	96	17.96	18.56	4123	5.9091	14870	0.809237	938881	38.9944	183424	1.95422	33186	1.30678	39999	0.67252	134393	50.1575	14615	0.196248
574	X	3	3	98	17.98	18.58	4072	6.03364	14804	0.832928	915139	39.2954	179850	1.98103	31973	1.30165	41936	0.728965	128619	49.6282	14278	0.198215
574	X	3	3	100	18	18.6	3726	5.44629	15077	0.836815	949843	40.2339	174145	1.89225	32246	1.29501	40262	0.6904	129875	49.435	12435	0.170295
574	X	3	3	102	18.02	18.62	4129	5.8084	15648	0.835848	971386	39.5992	179638	1.87853	32761	1.26621	44876	0.740583	135625	49.6824	14323	0.188775
574	X	3	3	104	18.04	18.64	3996	5.69913	15831	0.857331	962133	39.765	184734	1.95857	34085	1.33563	49523	0.828587	132889	49.3542	15082	0.20153
574	X	3	3	106	18.06	18.66	4067	5.77043	16346	0.880648	951908	39.1392	189403	1.9977	34591	1.34845	55678	0.926756	134573	49.7214	16207	0.215444
574	X	3	3	108	18.08	18.68	3925	5.8107	17306	0.972841	885859	38.0046	194564	2.14121	34430	1.40044	66418	1.15351	130380	50.2633	18271	0.253425
574	X	3	3	110	18.1	18.7	4050	5.87502	16280	0.896738	891903	37.4934	192470	2.07552	35263	1.40544	55434	0.943362	135266	51.0969	15721	0.213665
574	X	3	3	112	18.12	18.72	4217	6.1113	16643	0.915837	883817	37.1172	194497	2.09533	35608	1.4178	61752	1.04985	135359	51.0821	15512	0.210618
574	X	3	3	114	18.14	18.74	4941	8.34624	16299	1.04543	342620	16.7715	264700	3.32383	44202	2.05143	39005	0.772937	153098	67.3437	21800	0.345009
574	X	3	3	116	18.16	18.76	4808	8.08848	17660	1.12811	393072	19.1627	243999	3.0514	41574	1.9216	48350	0.954216	149231	65.3752	20191	0.318243
574	X	3	3	118	18.18	18.78	4945	8.53038	17355	1.1368	332227	16.6081	246847	3.16547	42482	2.01347	57587	1.1654	149273	67.0555	20101	0.324876
574	X	3	3	120	18.2	18.8	5425	9.35531	18724	1.22607	308123	15.398	252252	3.23372	43099	2.04204	69732	1.41071	149179	66.9912	21226	0.342945
574	X	3	3	122	18.22	18.82	4908	8.22527	16298	1.03714	410286	19.9258	241542	3.00917	41611	1.91599	47841	0.940575	148137	64.6488	18933	0.297278
574	X	3	3	124	18.24	18.84	4536	8.07678	17654	1.19362	340838	17.5872	239489	3.17	40722	1.9922	54248	1.13317	143522	66.548	17922	0.298985
574	X	3	3	126	18.26	18.86	4626	8.02943	18965	1.24994	338423	17.0224	246391	3.17916	41878	1.99712	66986	1.36399	147897	66.8482	19046	0.309728
574	X	3	3	128	18.28	18.88	4034	7.74409	17463	1.27295	349033	19.4171	230538	3.28992	38678	2.04003	63964	1.44052	129024	64.4995	16452	0.295904
574	X	3	3	130	18.3	18.9	4536	8.29828	19164	1.33125	310247	16.4477	239579	3.25816	39404	1.98059	75347	1.61707	140124	66.7543	18240	0.312635
574	X	3	3	132	18.32	18.92	4255	7.64625	17127	1.16866	338424	17.6235	234967	3.1388	39212	1.936	66505	1.40201	142713	66.7826	17944	0.302111
574	X	3	3	134	18.34	18.94	4786	8.49957	16769	1.13081	306100	15.7533	239512	3.16199	41333	2.01678	66974	1.39533	146495	67.7483	17668	0.293975
574	X	3	3	136	18.36	18.96	4779	8.38317	16795	1.11869	310192	15.7683	235967	3.07703	41181	1.98475	67919	1.39769	148816	67.9786	17752	0.291754
574	X	3	3	140	18.4	19	4609	8.14168	16540	1.10943	303124	15.5171	235098	3.0872	39655	1.92462	70126	1.45323	148888	68.4887	16802	0.278078
574	X	3	3	142	18.42	19.02	4803	8.54302	16195	1.0938	307797	15.8652	237533	3.14074	40734	1.99065	54717	1.14174	146686	67.9421	16968	0.282766
574	X	3	3	144	18.44	19.04	4671	8.10324	16047	1.05706	330101	16.595	241374	3.11278	41228	1.96508	40789	0.830118	150663	68.0623	16880	0.274359
574	X	3	3	146	18.46	19.06	4073	8.49926	11817	0.936333	278073	16.8154	191862	2.97621	33348	1.91194	31815	0.778836	124793	67.8122	13797	0.269742
574	X	3	4	2	18.52	19.12	3989	8.4878	11308	0.913637	262188	16.1669	186234	2.94577	32158	1.88	33788	0.843415	123627	68.5008	13124	0.261635
574	X	3	4	4	18.54	19.14	5855	8.49055	18922	1.04192	373729	15.7054	264647	2.85289	47253	1.88268	59074	1.00497	182034	68.7406	20685	0.281037
574	X	3	4	6	18.56	19.16	4992	8.08404	19633	1.20725	299200	14.041	265673	3.19823	43966	1.95618	67490	1.28216	165695	69.8739	23546	0.357248
574	X	3	4	8	18.58	19.18	5413	8.429	19942	1.17914	277644	12.5288	267898	3.1011	45993	1.96774	131488	2.40199	172722	70.0386	24242	0.353675
574	X	3	4	10	18.6	19.2	5114	7.38613	15696	0.8608	629955	26.3663	214736	2.30553	37606	1.49229	41064	0.695769	161314	60.6708	16436	0.222408
574	X	3	4	12	18.62	19.22	4905	7.10506	15564	0.856064	586165	24.6054	214988	2.315	36869	1.46733	28218	0.479515	166872	62.9453	16673	0.226277
574	X	3	4	14	18.64	19.24	4817	6.83114	15121	0.814243	654410	26.8936	204435	2.15517	36289	1.41394	28157	0.468437	165771	61.2176	15490	0.20581
574	X	3	4	16	18.66	19.26	4406	6.3339	15568	0.849799	689285	28.715	206061	2.20207	35371	1.39705	28234	0.476153	159738	59.7979	16940	0.228159
574	X	3	4	18	18.68	19.28	4584	6.41692	16307	0.866788	705669	28.6263	192549	2.0037	32906	1.2656	28553	0.468901	164990	60.1438	15854	0.207931
574	X	3	4	20	18.7	19.3	4963	7.02692	15227	0.818638	542080	22.2417	221075	2.32685	38112	1.48259	31949	0.530672	177247	65.3508	16721	0.22181
574	X	3	4	22	18.72	19.32	4747	7.39491	14693	0.869122	334850	15.1163	207241	2.39993	34571	1.47967	56367	1.03012	176219	71.4854	15380	0.224475
574	X	3	4	24	18.74	19.34	4637	7.76437	13045	0.829411	179161	8.69351	215972	2.68828	34467	1.58566	72779	1.42963	176068	76.7716	15140	0.237516
574	X	3	4	26	18.76	19.36	4501	7.17903	13823	0.837174	202300	9.35051	213450	2.53082	33139	1.45223	69905	1.30801	185625	77.0982	16328	0.243999
574	X	3	4	28	18.78	19.38	4564	7.42906	12006	0.742068	361338	17.0445	200935	2.43138	33662	1.50545	40109	0.765911	164822	69.8642	14252	0.217351
574	X	3	4	30	18.8	19.4	4384	7.04241	12211	0.744833	441992	20.5754	188558	2.25167	32077	1.41574	24717	0.465795	160881	67.2988	13646	0.205378
574	X	3	4	32	18.82	19.42	4416	7.45114	12355	0.791577	200265	9.79224	218043	2.73492	33793	1.5666	40072	0.7932	174369	76.6151	16143	0.255197
574	X	3	4	34	18.84	19.44	4212	7.60114	12765	0.874718	143065	7.48181	228426	3.06439	33911	1.68139	43264	0.915935	166199	78.1035	16392	0.277154
574	X	3	4	42	18.92	19.52	5125	7.73978	14816	0.849616	212581	9.30341	253059	2.84096	39257	1.62888	29948	0.530579	195339	76.8201	20258	0.286635
574	X	3	4	44	18.94	19.54	4364	6.52819	11962	0.679467	364742	15.8116	208108	2.31422	31653	1.30095	10148	0.178089	187319	72.9695	15552	0.217968
574	X	3	4	46	18.96	19.56	4499	6.79422	11130	0.638227	283359	12.4006	224174	2.51662	35562	1.47553	7909	0.140118	192768	75.8071	16087	0.227613
574	X	3	4	48	18.98	19.58	4878	7.54759	12200	0.716775	233207	10.4566	242132	2.78501	36405	1.54762	9291	0.168646	189931	76.5268	17312	0.250964
574	X	3	4	50	19	19.6	4524	7.07864	12064	0.716763	247845	11.238	246496	2.86712	36705	1.57794	9050	0.166121	186724	76.0815	18684	0.273902
574	X	3	4	52	19.02	19.62	4837	7.51398	12224	0.721048	314781	14.1705	240160	2.77334	37805	1.61355	8405	0.153172	179923	72.7834	18622	0.271031
574	X	3	4	54	19.04	19.64	5232	7.90415	13946	0.800007	317721	13.9097	242498	2.72336	40135	1.6659	8004	0.141854	184503	72.5843	19133	0.270813
574	X	3	4	56	19.06	19.66	4295	7.01461	12842	0.796398	277220	13.1204	229758	2.78946	35095	1.5748	8108	0.155347	174620	74.2653	18537	0.283647
574	X	3	4	58	19.08	19.68	5369	7.81498	14170	0.783179	376846	15.8958	245489	2.65629	41857	1.67394	8338	0.142378	186714	70.7722	19162	0.26132
574	X	3	4	62	19.12	19.72	5090	7.19197	13122	0.704023	442654	18.125	238687	2.50707	37753	1.46561	8710	0.144376	189222	69.623	18051	0.238962
574	X	3	4	64	19.14	19.74	5653	7.84129	14513	0.764403	632671	25.4313	242346	2.49892	42763	1.62973	8651	0.140774	170073	61.4321	20117	0.261439
574	X	3	4	66	19.16	19.76	5233	7.10082	14645	0.754577	687439	27.0318	229459	2.31458	40733	1.5186	7385	0.117559	172365	60.9057	20167	0.256388
574	X	3	4	68	19.18	19.78	4934	6.90255	9541	0.506829	492779	19.9777	210113	2.18511	34543	1.32773	6380	0.104708	188794	68.7781	16574	0.217238
574	X	3	4	70	19.2	19.8	5647	7.9073	12254	0.651546	659660	26.7678	231664	2.41145	41282	1.58822	7664	0.125896	165442	60.3264	16874	0.221374
574	X	3	4	72	19.22	19.82	5174	7.19693	14391	0.760096	822153	33.1403	217061	2.24446	39057	1.49265	9262	0.151138	151302	54.8046	16103	0.209858
574	X	3	4	74	19.24	19.84	5405	7.19876	13689	0.692294	879966	33.9634	217511	2.15354	39530	1.44653	10337	0.161512	156169	54.1637	17653	0.220282
574	X	3	4	76	19.26	19.86	5152	6.77033	13708	0.684014	919751	35.0257	217431	2.12405	39429	1.4236	11128	0.171553	156595	53.5875	17323	0.213282
574	X	3	4	78	19.28	19.88	5221	6.84102	12832	0.638438	986165	37.4455	199245	1.94072	37924	1.36527	13749	0.211342	150540	51.3654	15661	0.192258
574	X	3	4	80	19.3	19.9	5551	7.38124	13869	0.700261	866730	33.3983	213995	2.11529	39420	1.44017	22801	0.35568	157092	54.3956	17132	0.213434
574	X	3	4	82	19.32	19.92	5085	6.80011	12563	0.637933	962158	37.2867	203994	2.02792	38649	1.42004	16008	0.251136	147549	51.3822	15479	0.193939
574	X	3	4	84	19.34	19.94	4799	6.57821	13621	0.708962	888504	35.2939	195489	1.99199	35669	1.34334	28803	0.463172	149678	53.4277	15009	0.192756
574	X	3	4	86	19.36	19.96	5008	6.78748	12872	0.66244	921357	36.1872	198756	2.0025	37391	1.39235	29686	0.472002	148197	52.304	15123	0.192035
574	X	3	4	88	19.38	19.98	3938	5.51251	14145	0.751854	949530	38.5182	185560	1.93093	33518	1.28911	31204	0.512427	140718	51.295	14489	0.190025
574	X	3	4	90	19.4	20	4758	6.79354	14540	0.788302	695027	28.7578	211503	2.2449	36600	1.43579	40200	0.673357	158878	59.0727	17465	0.233635
574	X	3	4	92	19.42	20.02	4665	6.66815	14051	0.762637	725711	30.0608	209749	2.22875	35507	1.39446	33041	0.554057	156090	58.1005	17221	0.230627
574	X	3	4	94	19.44	20.04	4165	5.60192	13279	0.678178	993893	38.7386	177227	1.77199	32253	1.19187	25723	0.405874	146816	51.4217	15068	0.189878
574	X	3	4	96	19.46	20.06	4912	7.72531	15119	0.902895	334711	15.2549	239054	2.79487	39845	1.72175	60404	1.11448	171390	70.1931	19865	0.292714
574	X	3	4	98	19.48	20.08	4666	6.53422	11460	0.609383	728057	29.5459	214969	2.23786	38009	1.46243	8813	0.144784	162533	59.2709	14825	0.19451
574	X	3	4	100	19.5	20.1	4955	7.08772	13896	0.754761	674424	27.9563	223159	2.37294	38583	1.51634	13924	0.233655	160675	59.8498	17052	0.228526
574	X	3	4	102	19.52	20.12	5437	7.99316	12485	0.696954	482727	20.5657	243930	2.66583	41739	1.68593	16663	0.287382	172026	65.8574	17981	0.247669
574	X	3	4	106	19.56	20.16	4762	6.69443	13829	0.738196	827464	33.7098	218297	2.28129	38082	1.4709	23093	0.380849	148928	54.5195	15566	0.205021
574	X	3	4	108	19.58	20.18	4907	6.75843	13632	0.712929	882070	35.2059	210698	2.15724	37772	1.42935	20772	0.335626	148327	53.1988	15631	0.201704
574	X	3	4	110	19.6	20.2	4815	6.73061	13862	0.735768	862419	34.9349	208363	2.16515	36632	1.40688	35037	0.574557	146296	53.2528	15221	0.199342
574	X	3	4	112	19.62	20.22	4949	7.00816	12519	0.673152	697502	28.623	215152	2.26486	38037	1.4799	26887	0.446659	160797	59.2947	15799	0.209611
574	X	3	4	114	19.64	20.24	4413	6.27415	13957	0.753477	897020	36.9578	190880	2.01739	35104	1.37125	44536	0.742814	139640	51.699	13818	0.184062
574	X	3	4	116	19.66	20.26	4291	6.2653	12644	0.701011	824892	34.9031	192902	2.09377	34616	1.38867	44140	0.756073	141261	53.7103	13294	0.18186
574	X	3	4	118	19.68	20.28	4306	6.18799	12413	0.677344	927755	38.636	178955	1.91174	32696	1.29095	40605	0.684547	134773	50.4348	13122	0.176675
574	X	3	4	120	19.7	20.3	4346	6.90115	14274	0.860665	595023	27.3809	211186	2.4929	35504	1.54899	76893	1.43241	143072	59.1613	14898	0.221645
574	X	3	4	122	19.72	20.32	4317	6.89725	14653	0.88895	605575	28.0379	216270	2.56861	36589	1.60614	60412	1.13231	140952	58.6431	15085	0.225807
574	X	3	4	124	19.74	20.34	4719	7.36124	13919	0.824453	562181	25.4132	217533	2.52252	38413	1.64633	61184	1.11966	149873	60.8801	15902	0.232408
574	X	3	4	128	19.78	20.38	4285	6.91121	12777	0.782508	657642	30.738	206308	2.47359	35745	1.58401	58014	1.0977	133804	56.1984	14201	0.214595
574	X	3	4	130	19.8	20.4	4475	7.07126	10522	0.631334	579317	26.5279	206658	2.42753	36026	1.56408	30178	0.559425	148296	61.0218	13285	0.196682
574	X	3	4	132	19.82	20.42	4300	6.74147	11538	0.686868	595808	27.0692	201054	2.34319	35468	1.52778	42347	0.778855	148557	60.65	13798	0.202675
574	X	3	4	134	19.84	20.44	4539	6.74498	13595	0.767108	687127	29.5897	209664	2.31608	37965	1.55004	61962	1.08017	149205	57.7371	15428	0.214797
574	X	3	4	136	19.86	20.46	4495	7.01007	13024	0.771248	639821	28.9157	210594	2.44145	37029	1.58662	56714	1.0376	142852	58.0137	15304	0.223612
574	X	3	4	138	19.88	20.48	4547	6.8666	14637	0.839316	674522	29.5186	209050	2.3468	37501	1.55596	57610	1.02062	146597	57.6492	14343	0.202934
574	X	3	4	140	19.9	20.5	4304	7.60821	11588	0.777814	536495	27.4827	189521	2.49044	32813	1.59366	44501	0.922843	127966	58.9056	13209	0.218765
574	X	3	4	142	19.92	20.52	3558	6.79908	10471	0.759782	540121	29.9101	165823	2.35558	29120	1.52888	41026	0.919711	115599	57.5241	11325	0.202759
574	X	3	5	2	20.02	20.62	3366	4.77687	12890	0.694606	1060100	43.5971	148864	1.57046	27090	1.05627	27095	0.451093	129104	47.7112	10711	0.142415
574	X	3	5	4	20.04	20.64	3919	5.1022	12398	0.612902	1112820	41.9848	163933	1.58656	30252	1.08212	17062	0.260591	145204	49.228	11706	0.142787
574	X	3	5	6	20.06	20.66	3638	4.71511	11980	0.58958	1145680	43.0302	153800	1.48181	26682	0.950136	23313	0.354466	144441	48.7496	10632	0.129105
574	X	3	5	8	20.08	20.68	3196	4.5044	11402	0.610194	1023480	41.8017	132948	1.3929	23754	0.919826	52746	0.872103	135615	49.7725	9571	0.126382
574	X	3	5	16	20.16	20.76	2923	4.09036	12109	0.643425	1116720	45.2858	128122	1.3328	23567	0.906099	43122	0.707912	128718	46.9055	9775	0.128159
574	X	3	5	18	20.18	20.78	2923	3.60815	11799	0.553041	1401260	50.1255	127567	1.17058	23067	0.782321	61562	0.891489	133001	42.7525	10069	0.11645
574	X	3	5	20	20.2	20.8	3138	4.04157	11032	0.53952	1140390	42.5631	148249	1.41938	26630	0.942337	42095	0.636026	148273	49.7291	10691	0.129007
574	X	3	5	22	20.22	20.82	3126	4.14007	13469	0.677346	1100810	42.2487	139026	1.36875	25027	0.910679	60146	0.934486	143740	49.5732	11824	0.146717
574	X	3	5	24	20.24	20.84	3980	5.61492	15162	0.81222	604025	24.6944	176686	1.85298	29470	1.1423	78795	1.30409	175298	64.4004	13520	0.178704
574	X	3	5	26	20.26	20.86	3997	5.48318	13914	0.724781	398675	15.8489	170836	1.74215	27175	1.02425	145733	2.34533	203422	72.6687	12654	0.162639
574	X	3	5	28	20.28	20.88	3715	5.1835	14958	0.792492	796141	32.1912	154274	1.60017	25210	0.966442	34710	0.568155	161069	58.5232	13376	0.174859
574	X	3	5	30	20.3	20.9	3642	5.71383	13190	0.785758	287698	13.08	207836	2.42391	31736	1.36797	10860	0.199878	186499	76.193	16036	0.235712
574	X	3	5	32	20.32	20.92	3755	5.54744	11498	0.645003	347891	14.8939	177088	1.94482	27529	1.11741	6748	0.116951	196381	75.5498	13341	0.184658
574	X	3	5	34	20.34	20.94	4726	6.81585	13149	0.720072	252613	10.5576	216964	2.32607	34442	1.36475	7076	0.119719	207348	77.8713	16623	0.224613
574	X	3	5	36	20.36	20.96	4127	6.00996	14645	0.80981	337731	14.2525	197703	2.14022	30838	1.23385	6356	0.108585	198321	75.2068	17468	0.23833
574	X	3	5	38	20.38	20.98	4601	7.05796	14553	0.847688	226636	10.0749	228126	2.60142	34368	1.4485	8268	0.14879	194119	77.5437	19282	0.277126
574	X	3	5	40	20.4	21	4574	7.09452	14374	0.846567	215077	9.66727	229932	2.65116	35573	1.51595	7930	0.144294	192651	77.8126	18418	0.26765
574	X	3	5	42	20.42	21.02	4740	6.83865	13694	0.750204	282744	11.8214	228980	2.45583	36609	1.45117	7462	0.126298	203093	76.3025	18791	0.254004
574	X	3	5	44	20.44	21.04	4571	6.91879	13790	0.792575	241607	10.5977	231580	2.60573	36144	1.50312	7470	0.132644	195817	77.1829	18798	0.266581
574	X	3	5	46	20.46	21.06	4560	6.63829	12463	0.688923	315518	13.3106	212566	2.30035	35694	1.42766	7045	0.120315	198600	75.2874	16601	0.226425
574	X	3	5	48	20.48	21.08	4305	6.34141	13550	0.757894	483100	20.6221	197779	2.16572	32441	1.31294	6710	0.115953	178546	68.4879	14206	0.196057
574	X	3	5	50	20.5	21.1	4156	6.22198	12099	0.687795	553068	23.9946	188917	2.10248	32621	1.3418	7022	0.123328	167572	65.3289	14190	0.199037
574	X	3	5	52	20.52	21.12	3889	5.66004	13362	0.738431	726398	30.6365	169983	1.83906	29321	1.17246	7192	0.122795	157387	59.6489	13334	0.18182
574	X	3	5	54	20.54	21.14	4125	5.92168	13200	0.719535	774803	32.2326	165332	1.76436	28395	1.11996	8208	0.138231	154945	57.9229	13442	0.180794
574	X	3	5	56	20.56	21.16	4352	6.05576	14000	0.739716	678137	27.3452	169980	1.75827	29222	1.11719	19368	0.316164	172395	62.4678	15337	0.199949
574	X	3	5	58	20.58	21.18	3929	5.61927	14791	0.803253	664083	27.5235	168267	1.78898	27752	1.09051	17740	0.297646	168317	62.687	14168	0.189847
574	X	3	5	60	20.6	21.2	4087	6.18927	12674	0.728794	484714	21.2717	191425	2.15497	30827	1.28264	12317	0.21882	172285	67.9412	14980	0.212542
574	X	3	5	62	20.62	21.22	3648	5.42547	14222	0.803155	612670	26.4053	170101	1.88061	28122	1.14912	20747	0.361981	164671	63.775	14303	0.1993
574	X	3	5	64	20.64	21.24	3606	5.24431	13559	0.748767	685307	28.8822	155988	1.68641	25382	1.01421	31528	0.537906	162932	61.705	13297	0.181182
574	X	3	5	66	20.66	21.26	3659	5.58336	14248	0.825551	570340	25.2203	170667	1.93594	27020	1.13281	19234	0.344311	162957	64.7527	14345	0.205084
574	X	3	5	68	20.68	21.28	3489	5.24926	13741	0.785005	629773	27.4577	159064	1.77901	23556	0.973727	33724	0.595229	160725	62.9697	13502	0.190324
574	X	3	5	70	20.7	21.3	3516	4.95251	14034	0.750611	735697	30.0302	148519	1.55513	23829	0.922191	59191	0.978093	165315	60.6374	13174	0.173857
574	X	3	5	72	20.72	21.32	3217	4.36884	12608	0.650157	621014	24.4399	139032	1.40359	21772	0.812367	67693	1.07847	189741	67.1009	11459	0.145801
574	X	3	5	74	20.74	21.34	3510	4.85674	14841	0.779754	428814	17.1945	155493	1.5994	24585	0.934645	142098	2.30661	200236	72.1492	13820	0.179161
574	X	3	5	76	20.76	21.36	3372	5.01444	13705	0.773875	259270	11.173	165919	1.83417	26210	1.07088	234239	4.08641	195836	75.8366	15118	0.210633
574	X	3	5	78	20.78	21.38	3713	5.49618	13974	0.785441	258879	11.1049	187499	2.06321	27886	1.13412	75946	1.31883	201987	77.8594	17153	0.237889
574	X	3	5	80	20.8	21.4	3325	5.16625	14399	0.849519	355192	15.993	181879	2.10075	26431	1.12833	29533	0.538319	182833	73.9759	17032	0.247941
574	X	3	5	82	20.82	21.42	3944	5.65593	15939	0.867931	230073	9.56128	192333	2.05036	28521	1.12375	52479	0.882878	213173	79.6069	18676	0.250928
574	X	3	5	84	20.84	21.44	3628	5.56489	13358	0.778014	178099	7.9165	183966	2.09766	26090	1.09952	17297	0.311249	205261	81.9874	17035	0.24481
574	X	3	5	86	20.86	21.46	3865	5.37633	11625	0.614026	144013	5.80526	193216	1.99797	28387	1.08491	10093	0.164704	233897	84.7252	17768	0.231565
574	X	3	5	88	20.88	21.48	3713	5.5238	11673	0.659404	112733	4.86012	213837	2.36485	28267	1.1554	17434	0.304269	219116	84.8864	17632	0.245761
574	X	3	5	90	20.9	21.5	3726	5.45116	12340	0.685517	95505	4.04907	215872	2.34775	29535	1.18719	17124	0.2939	225054	85.7402	17889	0.245206
574	X	3	5	92	20.92	21.52	3362	5.02724	11096	0.630021	138221	5.98948	179646	1.99691	25087	1.03067	16266	0.285339	217792	84.8058	16744	0.234579
574	X	3	5	94	20.94	21.54	3884	5.88202	11343	0.652277	127646	5.60193	197857	2.22745	28856	1.20067	18787	0.333774	212688	83.8768	15862	0.225063
574	X	3	5	96	20.96	21.56	3793	5.62847	11451	0.64522	131700	5.66339	197515	2.1788	27809	1.13379	18905	0.329103	217859	84.185	16993	0.236252
574	X	3	5	98	20.98	21.58	3993	5.68967	11236	0.607934	185193	7.64707	185386	1.96369	27521	1.07743	17594	0.294103	222409	82.5261	14531	0.193991
574	X	3	5	100	21	21.6	3711	4.89618	11320	0.567113	120906	4.62272	181365	1.77881	25294	0.916901	17007	0.263234	252471	86.742	17231	0.212998
574	X	3	5	102	21.02	21.62	4774	7.28412	15881	0.920088	126234	5.58154	253258	2.87254	37024	1.55209	12557	0.224765	204494	81.2507	21978	0.314182
574	X	3	5	104	21.04	21.64	4522	6.87567	15235	0.879597	148924	6.56194	238499	2.69575	35077	1.46536	10868	0.193857	204629	81.022	21467	0.305812
574	X	3	5	106	21.06	21.66	3639	5.12585	12669	0.677614	627747	25.6242	169756	1.77753	25951	1.00433	6685	0.110467	178561	65.497	13863	0.182953
574	X	3	5	108	21.08	21.68	4684	6.92525	13734	0.771032	248493	10.6467	232590	2.55634	34417	1.39807	9749	0.169093	200671	77.26	19742	0.273469
574	X	3	5	110	21.1	21.7	4746	7.19444	14266	0.821161	279086	12.26	234877	2.64678	36088	1.50304	9759	0.173549	190403	75.1614	16874	0.239655
574	X	3	5	112	21.12	21.72	4349	7.01884	12987	0.795869	292406	13.6756	226578	2.71833	34055	1.51006	7305	0.138307	175836	73.8984	16178	0.244624
574	X	3	5	114	21.14	21.74	4699	6.63069	14005	0.750401	568099	23.2306	215731	2.26295	36229	1.40459	7216	0.119453	177953	65.3898	15996	0.211477
574	X	3	5	116	21.16	21.76	5320	6.71487	14242	0.68258	680924	24.9062	219064	2.05544	38424	1.3325	6713	0.0994009	194720	64.0011	17579	0.207883
574	X	3	5	118	21.18	21.78	4550	6.12108	15037	0.76813	637084	24.8368	217824	2.17837	36629	1.35388	7351	0.116014	183875	64.4156	16672	0.210137
574	X	3	5	120	21.2	21.8	4830	6.20797	16018	0.78175	782931	29.1614	210881	2.01488	35617	1.25776	7516	0.113328	180043	60.2602	16834	0.202716
574	X	3	5	122	21.22	21.82	4243	6.03263	11969	0.646172	583447	24.0391	194768	2.05854	31516	1.23113	6872	0.114621	177470	65.7068	12840	0.17104
574	X	3	5	124	21.24	21.84	4813	6.41176	12905	0.652794	722880	27.9068	211396	2.09347	36244	1.32659	6107	0.0954415	176792	61.3303	14644	0.182776
574	X	3	5	126	21.26	21.86	5035	6.55845	16241	0.803288	770295	29.0765	209469	2.02829	35099	1.25613	6494	0.0992342	176789	59.9664	17349	0.211726
574	X	3	5	128	21.28	21.88	4025	5.63487	14708	0.781858	769518	31.219	199987	2.08127	32750	1.2597	6001	0.0985574	161107	58.7332	14603	0.191539
574	X	3	5	130	21.3	21.9	3991	5.96692	14685	0.83368	700890	30.367	184422	2.0497	30945	1.27115	7008	0.122917	152094	59.2151	12392	0.173583
574	X	3	5	134	21.34	21.94	3974	6.01801	13744	0.790306	677463	29.7299	184283	2.07453	31423	1.30741	11325	0.201192	151384	59.6975	12764	0.181097
574	X	3	5	136	21.36	21.96	3711	6.28744	14324	0.921518	515966	25.333	185992	2.34253	30759	1.43184	11136	0.22134	143333	63.2383	14111	0.223995
574	X	3	5	138	21.38	21.98	3174	5.52463	14649	0.968191	560030	28.2482	175573	2.27176	28590	1.36725	12580	0.256877	134934	61.1602	12439	0.202852
574	X	3	5	140	21.4	22	3623	6.42515	14703	0.990097	442029	22.7169	189421	2.49719	30571	1.48958	10344	0.215204	141686	65.4325	14050	0.233448
574	X	3	5	142	21.42	22.02	3711	6.61966	15061	1.02013	403989	20.8832	191013	2.53289	30088	1.47461	7947	0.166301	144376	67.0642	14299	0.238973
574	X	3	5	144	21.44	22.04	3652	6.60133	14108	0.968329	406401	21.2882	194052	2.60752	31621	1.57042	7105	0.150665	141423	66.569	14441	0.244566
574	X	3	5	146	21.46	22.06	4316	8.25232	13948	1.01266	191516	10.6116	217288	3.08844	34887	1.83272	8165	0.183146	150071	74.721	16638	0.298053
574	X	3	5	148	21.48	22.08	3669	7.79255	10623	0.856714	204619	12.5939	196194	3.09761	28768	1.67873	7094	0.176755	132978	73.5467	12915	0.256995
574	X	3	6	4	21.54	22.14	4729	7.49034	16171	0.972582	469604	21.555	225147	2.65098	35298	1.5361	8683	0.161343	158500	65.3752	17418	0.258481
574	X	3	6	6	21.56	22.16	4845	6.61654	15722	0.815271	626260	24.7842	207681	2.10835	34516	1.29508	8021	0.128503	180067	64.0358	16903	0.216271
574	X	3	6	8	21.58	22.18	4498	6.98958	15164	0.894751	475514	21.413	207941	2.40204	32165	1.37326	9215	0.167987	164413	66.5303	15735	0.229085
574	X	3	6	10	21.6	22.2	3921	6.65371	16976	1.09385	367602	18.0771	224908	2.83714	34104	1.59005	13507	0.268889	156566	69.1856	18474	0.293715
574	X	3	6	12	21.62	22.22	4478	6.87677	15967	0.931067	358398	15.9496	215211	2.45682	33833	1.42751	18884	0.340206	179489	71.7778	16700	0.240279
574	X	3	6	14	21.64	22.24	4583	7.3589	15627	0.952786	325024	15.1238	202411	2.41605	33106	1.46052	13605	0.256277	172661	72.1953	15713	0.236385
574	X	3	6	16	21.66	22.26	4363	6.85902	15978	0.953798	450562	20.5265	219406	2.5641	34015	1.46922	15343	0.282967	163886	67.0919	17141	0.252471
574	X	3	6	18	21.68	22.28	4428	6.99928	15892	0.953852	415811	19.0469	218590	2.56853	34563	1.50105	14367	0.266415	166241	68.4282	15920	0.235769
574	X	3	6	20	21.7	22.3	4631	6.93971	16753	0.95327	385636	16.7466	220364	2.4548	35733	1.47121	34110	0.599647	180897	70.591	17363	0.243775
574	X	3	6	22	21.72	22.32	4060	6.79081	16762	1.06458	429447	20.8156	221203	2.7504	34658	1.59271	32258	0.632966	151734	66.0891	16841	0.263913
574	X	3	6	24	21.74	22.34	4487	7.29886	16214	1.00149	444209	20.9396	212103	2.56481	33125	1.48045	60584	1.15612	154204	65.32	15660	0.238665
574	X	3	6	26	21.76	22.36	4076	6.59031	15658	0.961312	478902	22.4389	207166	2.49	32795	1.45686	65869	1.2494	153383	64.5803	15379	0.232969
574	X	3	6	28	21.78	22.38	4210	6.55799	15554	0.919999	572599	25.8477	208906	2.41907	33198	1.42082	13185	0.240944	153769	62.3747	14990	0.21877
574	X	3	6	30	21.8	22.4	4335	6.96635	15705	0.958321	518991	24.169	214840	2.56649	33618	1.48432	10141	0.191181	151543	63.4167	16446	0.247614
574	X	3	6	32	21.82	22.42	4119	6.51083	12202	0.732374	379003	17.3608	200783	2.35929	30894	1.34171	6486	0.120273	173410	71.379	13215	0.195709
574	X	3	6	34	21.84	22.44	4121	6.66886	12878	0.791323	520656	24.4165	198602	2.38914	31190	1.38676	7495	0.142288	151840	63.9862	14442	0.218965
574	X	3	6	38	21.88	22.48	3883	6.00498	16029	0.941255	628173	28.1518	186627	2.14549	28794	1.22345	24571	0.445774	151103	60.8511	16297	0.236129
574	X	3	6	40	21.9	22.5	3927	5.58032	15302	0.825664	625012	25.7377	180128	1.90278	28600	1.11661	22901	0.381769	173648	64.2569	14892	0.198267
574	X	3	6	42	21.92	22.52	3298	4.74279	12633	0.689836	431952	18.0012	164487	1.75842	23820	0.941159	23404	0.39484	195743	73.3028	12541	0.168971
574	X	3	6	44	21.94	22.54	3175	4.4269	10170	0.538435	492488	19.8991	151485	1.57012	22041	0.844356	8529	0.139509	199469	72.424	12060	0.157544
574	X	3	6	46	21.96	22.56	2793	3.37766	9902	0.454699	289038	10.1294	123636	1.11147	15104	0.501851	7108	0.100842	267349	84.1927	11597	0.131398
574	X	3	6	48	21.98	22.58	3630	4.14245	9088	0.3938	402728	13.3182	130687	1.10864	19469	0.610425	5413	0.0724663	269882	80.2002	14386	0.153811
574	X	3	6	50	22	22.6	3532	5.09418	10599	0.580464	364713	15.2436	151545	1.62481	23117	0.916058	6250	0.10575	203109	76.2841	11180	0.151075
574	X	3	6	52	22.02	22.62	3564	5.47957	13884	0.810551	482036	21.4769	170501	1.9487	25279	1.06784	7055	0.127249	172062	68.8883	13946	0.200889
574	X	3	6	54	22.04	22.64	3911	5.74966	13715	0.765609	424176	18.0711	169642	1.85394	26264	1.06085	7097	0.122399	188551	72.183	14048	0.193494
574	X	3	6	56	22.06	22.66	3526	5.02961	11692	0.633283	314297	12.992	160777	1.70485	22827	0.894622	7946	0.132968	211162	78.4367	13166	0.175956
574	X	3	6	58	22.08	22.68	3445	5.42779	10920	0.653301	355699	16.2405	176718	2.06978	24511	1.06104	7459	0.137868	180832	74.1926	14708	0.217113
574	X	3	6	60	22.1	22.7	3403	4.44065	11727	0.58107	352363	13.3247	163966	1.59055	22267	0.798335	6261	0.0958465	232426	78.9807	15386	0.188109
574	X	3	6	62	22.12	22.72	3107	4.33042	10773	0.57014	469558	18.9653	169513	1.75631	23823	0.91227	6384	0.104383	201561	73.1554	15757	0.20576
574	X	3	6	66	22.16	22.76	4057	7.16712	13520	0.906928	284812	14.5808	216969	2.84935	33213	1.61208	6536	0.135456	157570	72.4877	15745	0.260603
574	X	3	6	68	22.18	22.78	4318	6.879	14750	0.89226	326840	15.089	213040	2.52297	32275	1.41269	6948	0.129853	175571	72.8361	15950	0.238068
574	X	3	6	70	22.2	22.8	3581	5.85409	11396	0.707399	320477	15.1822	181852	2.20995	28073	1.2609	5964	0.114377	174922	74.4648	13468	0.20628
574	X	3	6	74	22.24	22.84	4365	7.57603	15388	1.01414	231212	11.6292	252629	3.25949	36303	1.73116	8612	0.175351	164381	74.2952	19645	0.319454
574	X	3	6	76	22.26	22.86	4194	6.71397	14180	0.861954	270099	12.5302	222765	2.65098	31841	1.40048	9309	0.174824	180910	75.4163	16760	0.251376
574	X	3	6	78	22.28	22.88	4197	6.95143	12866	0.809162	249071	11.9548	219540	2.70307	32666	1.48652	14424	0.280265	175153	75.5447	17405	0.270089
574	X	3	6	80	22.3	22.9	4383	7.50824	15154	0.985713	235557	11.6935	224250	2.85567	34317	1.61516	39856	0.800955	166446	74.2491	18170	0.291622
574	X	3	6	82	22.32	22.92	4048	7.12154	15302	1.02221	264814	13.5007	221461	2.89627	32474	1.56967	62475	1.2894	157835	72.3082	17713	0.29196
574	X	3	6	84	22.34	22.94	3724	5.83632	15090	0.897998	605445	27.4971	206659	2.40764	30908	1.33088	50408	0.92678	149143	60.8672	16074	0.236021
574	X	3	6	86	22.36	22.96	3964	5.93801	15519	0.88273	712301	30.921	195860	2.18103	28515	1.1736	59543	1.04637	147739	57.6307	16142	0.226549
574	X	3	6	88	22.38	22.98	3992	6.88257	14128	0.924906	331447	16.5599	211648	2.71258	32597	1.5441	88912	1.79832	154310	69.2796	18450	0.298026
574	X	3	6	90	22.4	23	4132	6.88912	15207	0.962729	373168	18.0298	213238	2.64288	32913	1.50768	83505	1.63329	156734	68.0485	18311	0.286032
574	X	3	6	92	22.42	23.02	4024	6.99112	15128	0.997992	359590	18.1042	207208	2.67611	32932	1.57197	100254	2.04333	148819	67.3284	17624	0.286874
574	X	3	6	94	22.44	23.04	4045	6.88206	12988	0.839072	421868	20.7998	196767	2.48863	30909	1.44485	52594	1.04975	149529	66.2486	15507	0.247187
574	X	3	6	96	22.46	23.06	4333	7.20176	13984	0.882548	482257	23.228	191250	2.36298	31410	1.43435	50322	0.981196	147091	63.6631	15804	0.246102
574	X	3	6	98	22.48	23.08	4201	7.17439	12785	0.829067	446213	22.083	208485	2.64677	31990	1.50101	12082	0.242058	146776	65.2737	15625	0.250006
574	X	3	6	100	22.5	23.1	4287	7.08174	11645	0.730437	471240	22.5586	207050	2.54255	32122	1.4579	9527	0.184625	151559	65.1958	16051	0.24842
574	X	3	6	102	22.52	23.12	3706	6.14613	12000	0.755674	570613	27.4234	195022	2.4043	30058	1.3696	16845	0.327729	141988	61.3196	16317	0.253533
574	X	3	6	106	22.56	23.16	4093	6.65433	14728	0.909208	515647	24.294	210049	2.53859	32470	1.45039	73160	1.39535	147586	62.4826	18088	0.275519
574	X	3	6	108	22.58	23.18	3904	6.45992	14553	0.91438	513903	24.6423	204202	2.51181	32530	1.4789	44346	0.860834	145918	62.875	16570	0.256885
574	X	3	6	110	22.6	23.2	3961	6.62262	14914	0.946839	529421	25.6513	206197	2.56281	32175	1.47803	63960	1.25453	140578	61.206	17738	0.277861
574	X	3	6	112	22.62	23.22	4130	7.04655	14753	0.955793	461190	22.8029	211756	2.68578	32172	1.50814	56580	1.1325	143106	63.5822	17900	0.286139
574	X	3	6	114	22.64	23.24	4129	6.8843	15099	0.955917	403865	19.5135	211641	2.62315	33365	1.52843	62305	1.21867	154358	67.0186	16479	0.257421
574	X	3	6	116	22.66	23.26	3640	6.60258	10167	0.700264	338837	17.8109	195682	2.63859	29466	1.46849	11936	0.253991	148762	70.2677	15149	0.257451
574	X	3	6	118	22.68	23.28	4768	8.48632	13944	0.942383	240358	12.3972	236262	3.12598	35692	1.74539	26004	0.542964	156350	72.4657	17634	0.294057
574	X	3	6	120	22.7	23.3	4276	7.88211	12783	0.894735	261129	13.949	225517	3.09024	32580	1.65004	21494	0.464804	149527	71.7754	17002	0.293632
574	X	3	6	122	22.72	23.32	4392	7.63941	14211	0.938597	406085	20.469	212112	2.74266	32924	1.57343	43362	0.884819	144534	65.4665	17523	0.285564
574	X	3	6	124	22.74	23.34	4047	7.40744	13888	0.965231	408742	21.6804	215274	2.92911	32887	1.65386	54491	1.17006	134111	63.9221	15853	0.27186
574	X	3	6	126	22.76	23.36	3735	6.45147	14130	0.926759	559941	28.0281	204380	2.62431	30955	1.46905	33975	0.688454	132380	59.5445	16525	0.267428
574	X	3	6	128	22.78	23.38	3819	6.39242	13580	0.863122	569190	27.6093	200130	2.49021	31043	1.42764	19848	0.389745	138958	60.569	16485	0.258525
574	X	3	6	130	22.8	23.4	4026	6.71707	13580	0.860325	536525	25.9405	191515	2.37529	29934	1.37217	41812	0.818379	141959	61.6766	15332	0.239664
574	X	3	6	132	22.82	23.42	3712	6.4501	12090	0.797704	483949	24.3692	190901	2.4659	29634	1.41477	26203	0.534143	140878	63.746	13646	0.222158
574	X	3	6	134	22.84	23.44	3931	6.65736	13335	0.857529	537823	26.395	192673	2.42565	29205	1.35892	23593	0.468738	139646	61.5856	15835	0.251255
574	X	3	6	136	22.86	23.46	3775	6.40059	13256	0.853439	536607	26.3659	186521	2.35093	29085	1.35491	20848	0.414682	140467	62.0196	15106	0.239967
574	X	3	6	138	22.88	23.48	3744	6.64685	13327	0.898398	508195	26.1453	184793	2.43879	28074	1.36938	15817	0.329421	133949	61.9257	14803	0.246223
574	X	3	6	140	22.9	23.5	4014	6.95225	13063	0.859108	537450	26.9755	193581	2.49241	29563	1.40681	35940	0.730254	133751	60.3249	15946	0.258761
574	X	3	6	142	22.92	23.52	3827	6.63225	12288	0.808612	525559	26.3941	187743	2.41866	28551	1.35945	12098	0.24596	137225	61.928	13116	0.212962
574	X	3	6	144	22.94	23.54	3577	6.3937	11851	0.80435	518515	26.8583	185045	2.45878	27829	1.36669	24990	0.52402	131830	61.362	13868	0.232245
574	X	3	6	146	22.96	23.56	3979	6.59758	12538	0.789397	670422	32.2138	184404	2.27295	29575	1.34733	19540	0.380087	130123	56.1844	13805	0.214459
574	X	3	6	148	22.98	23.58	3860	6.40741	11961	0.753909	654335	31.4759	185966	2.29476	30249	1.37957	18007	0.350658	132137	57.1177	14152	0.220095
574	X	3	7	4	23.04	23.64	4389	5.52325	10057	0.480567	895119	32.6432	174199	1.62961	31285	1.08169	7663	0.113129	178185	58.3918	11602	0.136792
574	X	3	7	6	23.06	23.66	4586	6.70448	11767	0.653211	747644	31.6744	194331	2.11194	32456	1.30366	13510	0.231704	150113	57.148	12599	0.17257
574	X	3	7	8	23.08	23.68	4373	5.97872	12851	0.667148	847381	33.573	175434	1.783	30320	1.13893	28229	0.452764	157970	56.2412	12898	0.165215
574	X	3	7	10	23.1	23.7	4246	5.76613	12217	0.629979	851156	33.4963	173602	1.75254	30786	1.14867	30515	0.486145	159944	56.5619	12442	0.158304
574	X	3	7	12	23.12	23.72	3716	4.80576	14221	0.698349	1135990	42.574	168747	1.6223	28598	1.01616	43943	0.666689	143842	48.4421	14413	0.174638
574	X	3	7	14	23.14	23.74	3735	4.99074	12544	0.636454	1123210	43.4928	154393	1.53359	27182	0.997916	13062	0.204754	137941	47.9975	11679	0.14621
574	X	3	7	16	23.16	23.76	3485	4.55729	13553	0.67297	1158180	43.8896	159550	1.55099	27452	0.986316	10700	0.164148	140985	48.0096	13803	0.169112
574	X	3	7	18	23.18	23.78	3624	4.80598	13185	0.663943	1056710	40.6099	164514	1.62183	26748	0.974593	17894	0.278387	147349	50.8853	12886	0.160107
574	X	3	7	20	23.2	23.8	4367	5.79286	13338	0.671826	812745	31.2426	200994	1.98199	32514	1.185	15333	0.238608	169851	58.6718	17330	0.21538
574	X	3	7	22	23.22	23.82	4296	5.52886	13930	0.680737	882672	32.9195	185528	1.77496	30539	1.07985	14435	0.217939	171918	57.6161	15092	0.181977
574	X	3	7	24	23.24	23.84	4294	5.56875	11365	0.559657	881678	33.1351	178529	1.72113	30312	1.08006	10735	0.163322	170602	57.6144	12965	0.157531
574	X	3	7	26	23.26	23.86	4068	5.58548	11462	0.597581	965280	38.4075	162054	1.65405	27666	1.04367	14108	0.227244	146400	52.3446	10874	0.139884
574	X	3	7	28	23.28	23.88	3813	5.24583	12884	0.673062	912865	36.3946	166470	1.70252	27481	1.03877	25238	0.407333	151820	54.3911	11390	0.146815
574	X	3	7	30	23.3	23.9	3967	5.14568	12926	0.636651	969090	36.4273	163066	1.57236	27177	0.968546	26170	0.398228	161956	54.7052	12010	0.145956
574	X	3	7	32	23.32	23.92	4562	5.37696	12786	0.572233	887915	30.3274	167529	1.46784	28028	0.907637	39263	0.542891	197611	60.6518	13868	0.153142
574	X	3	7	34	23.34	23.94	3371	3.76321	10680	0.452717	705779	22.8324	139315	1.15613	20968	0.643124	50883	0.666377	242029	70.3587	12176	0.127351
574	X	3	7	36	23.36	23.96	4213	5.25572	10047	0.47592	761562	27.5315	161518	1.49786	27297	0.935609	5799	0.0848676	197277	64.0868	11272	0.131747
574	X	3	7	38	23.38	23.98	2712	5.13441	6892	0.495453	618333	33.9239	105170	1.48013	18424	0.958347	4372	0.0971021	117189	57.7748	7656	0.1358
574	X	4	1	14	23.64	24.04	3219	5.15136	10782	0.655175	900052	41.7399	124808	1.48475	22013	0.967874	40995	0.769626	117783	49.0835	9860	0.147835
574	X	4	1	16	23.66	24.06	2896	5.2258	10623	0.727877	695671	36.3782	130161	1.746	21923	1.08691	29376	0.621863	115023	54.0493	9704	0.16406
574	X	4	1	18	23.68	24.08	2457	4.14963	9871	0.633027	1000890	48.9862	100706	1.26435	17242	0.800074	41963	0.831416	98239	43.2056	8201	0.129768
574	X	4	1	20	23.7	24.1	2262	3.6187	9816	0.596282	1082790	50.1979	105454	1.2541	18250	0.802161	36129	0.678053	102582	42.7349	7865	0.117885
574	X	4	1	24	23.74	24.14	3159	5.21695	11839	0.742401	740357	35.4316	149309	1.833	24209	1.09845	32482	0.629299	127604	54.876	11136	0.172304
574	X	4	1	26	23.76	24.16	2703	4.47468	11018	0.692588	768392	36.8622	133616	1.64431	21876	0.994997	30849	0.599107	126614	54.5819	9686	0.150231
574	X	4	1	28	23.78	24.18	3119	5.34525	10129	0.659137	632454	31.4097	139706	1.77982	21903	1.03132	10689	0.2149	133110	59.4038	9718	0.156037
574	X	4	1	30	23.8	24.2	2776	4.89487	10503	0.703221	645774	32.9978	141951	1.86067	21390	1.03627	16182	0.334736	126335	58.0092	9879	0.163205
574	X	4	1	32	23.82	24.22	2121	4.9863	7629	0.681023	465093	31.6855	105779	1.84861	14764	0.95363	8344	0.230123	97123	59.4581	7118	0.156781
574	X	4	1	34	23.84	24.24	2578	4.69674	10494	0.725958	694221	36.6517	135895	1.84046	21411	1.07174	21557	0.460734	114646	54.3906	9490	0.161986
574	X	4	1	36	23.86	24.26	2863	5.10501	11602	0.785533	718267	37.1145	140461	1.86183	21887	1.07226	23305	0.487497	115012	53.4035	10171	0.169917
574	X	4	1	38	23.88	24.28	3046	5.47437	12026	0.820696	710011	36.9788	151227	2.02042	22893	1.13043	14430	0.304242	113359	53.0532	12937	0.217839
574	X	4	1	40	23.9	24.3	2551	4.7716	10446	0.741925	751841	40.7533	146466	2.03657	22879	1.17579	13827	0.303409	102697	50.0222	11143	0.195278
574	X	4	1	42	23.92	24.32	2680	5.2992	10334	0.775892	663694	38.03	133683	1.96499	20626	1.12054	22216	0.515335	101209	52.113	9769	0.180977
574	X	4	1	44	23.94	24.34	2497	5.05105	9357	0.718715	631911	37.0427	119528	1.79739	19954	1.109	41350	0.981266	100872	53.1356	8672	0.164354
574	X	4	1	46	23.96	24.36	2206	4.75051	7992	0.653502	619056	38.632	116611	1.86674	18676	1.10499	19224	0.485653	93333	52.3385	8332	0.168106
574	X	4	1	48	23.98	24.38	2674	4.94671	9044	0.63529	686691	36.8128	124046	1.70587	20738	1.05405	9540	0.207038	113097	54.4825	8981	0.15566
574	X	4	1	50	24	24.4	2816	4.94602	10553	0.703811	730306	37.1716	127757	1.66808	21189	1.02252	11871	0.244601	118241	54.0807	9884	0.16265
574	X	4	1	52	24.02	24.42	1873	3.52184	7877	0.562405	359839	19.6075	81861	1.14424	10635	0.549424	84579	1.8657	148355	72.6416	6089	0.107269
574	X	4	1	54	24.04	24.44	1975	3.56839	10733	0.736349	424447	22.2235	107699	1.44653	15070	0.748096	45670	0.96802	148995	70.1017	12253	0.207418
574	X	4	1	56	24.06	24.46	1848	3.5519	10372	0.756969	396722	22.0967	104289	1.49007	14775	0.780234	51025	1.15051	139863	70.0024	9505	0.171163
574	X	4	1	58	24.08	24.48	1790	3.52852	9557	0.715348	363276	20.7519	95047	1.39279	13281	0.719297	27871	0.644524	140465	72.1039	7782	0.143724
574	X	4	1	60	24.1	24.5	1990	3.77133	9332	0.671542	455470	25.0141	103389	1.45655	14028	0.730425	9270	0.206096	137810	68.0102	7875	0.139827
574	X	4	1	62	24.12	24.52	1808	3.47282	7308	0.533014	399981	22.2641	99408	1.41943	13731	0.724643	7409	0.166952	142528	71.2911	7109	0.127935
574	X	4	1	64	24.14	24.54	1949	3.76778	7553	0.554434	359385	20.1334	100959	1.45087	14489	0.769574	6340	0.143784	145081	73.0357	7976	0.144463
574	X	4	1	66	24.16	24.56	1584	2.98403	6193	0.443003	261295	14.2647	89192	1.24906	11621	0.601493	5526	0.122126	163512	80.2139	6897	0.121733
574	X	4	1	68	24.18	24.58	1134	2.01291	5088	0.342938	263763	13.5678	59465	0.78466	7505	0.366016	4461	0.0928947	179039	82.758	4497	0.0747881
574	X	4	1	70	24.2	24.6	1699	2.99908	6441	0.431722	317715	16.2523	88363	1.15951	11247	0.545469	5121	0.106047	170535	78.3898	7018	0.116066
574	X	4	1	72	24.22	24.62	1934	3.42454	7108	0.477914	463086	23.7624	94405	1.24265	13575	0.660425	5001	0.103884	152264	70.2092	7175	0.119032
574	X	4	1	74	24.24	24.64	2038	3.62685	7079	0.47836	448169	23.1127	103130	1.36433	14242	0.696362	6041	0.12612	152027	70.4528	8548	0.142524
574	X	4	1	76	24.26	24.66	1650	3.11754	6142	0.440651	325265	17.8094	87282	1.22592	11448	0.594287	5730	0.127008	155646	76.5804	5918	0.104761
574	X	4	1	78	24.28	24.68	1679	3.14813	5078	0.361536	263765	14.3319	90858	1.26641	10611	0.546635	7124	0.156702	164065	80.1069	4659	0.0818452
574	X	4	1	80	24.3	24.7	1617	3.107	5772	0.421128	275745	15.354	82376	1.17663	10807	0.570524	6097	0.137434	158103	79.1083	6942	0.124972
574	X	4	1	82	24.32	24.72	1032	2.18706	3913	0.314881	219893	13.5044	60164	0.947819	7293	0.424644	4505	0.112001	149311	82.3993	5537	0.109939
574	X	4	1	84	24.34	24.74	1201	2.09264	2708	0.179167	282475	14.2631	51330	0.664863	5499	0.263253	3908	0.079883	181482	82.3449	6869	0.112136
574	X	4	1	86	24.36	24.76	1431	2.57906	5380	0.368181	350441	18.3029	79317	1.06267	9959	0.493147	5593	0.118254	164005	76.9716	6173	0.104236
574	X	4	1	88	24.38	24.78	1228	2.26833	3645	0.25566	178538	9.55702	69647	0.956357	7360	0.37353	6418	0.139077	179495	86.3401	6352	0.10993
574	X	4	1	92	24.42	24.82	1371	2.5065	4901	0.340229	230243	12.1983	76848	1.04441	9124	0.458304	4678	0.100332	174737	83.1891	9503	0.162776
574	X	4	1	94	24.44	24.84	1471	2.36069	3315	0.202007	243255	11.3128	64917	0.774449	7724	0.34057	4524	0.0851718	203053	84.8567	4494	0.0675704
574	X	4	1	96	24.46	24.86	2193	4.25611	7499	0.55263	259548	14.5974	121163	1.74805	16084	0.857644	9366	0.213244	153623	77.6394	7452	0.135502
574	X	4	1	98	24.48	24.88	1915	3.93953	6710	0.524149	247199	14.7369	111304	1.70214	14038	0.79345	9808	0.236703	145488	77.9389	6654	0.12825
574	X	4	1	100	24.5	24.9	1866	3.88693	8058	0.637352	293679	17.7277	119885	1.85639	17484	1.00063	9815	0.239847	137301	74.4767	8938	0.174435
574	X	4	1	102	24.52	24.92	1988	4.08907	7184	0.561088	260470	15.5256	111597	1.70635	15056	0.850856	7451	0.179792	143633	76.9332	7995	0.154072
574	X	4	1	104	24.54	24.94	2179	4.28167	8307	0.619808	409490	23.3175	127915	1.86847	17212	0.929236	7858	0.181141	134111	68.6234	9709	0.178743
574	X	4	1	106	24.56	24.96	2113	4.0984	8177	0.602234	382915	21.5229	122692	1.76905	18451	0.98327	6751	0.153614	139998	70.7111	8775	0.159463
574	X	4	1	108	24.58	24.98	1960	3.86589	7472	0.559612	363375	20.7698	115359	1.69143	15896	0.86143	6950	0.160815	140066	71.9412	8109	0.149851
574	X	4	1	110	24.6	25	1698	3.46068	7685	0.594737	411202	24.2863	99729	1.51096	14535	0.813912	5824	0.139249	130111	69.0541	7333	0.140024
574	X	4	1	112	24.62	25.02	2017	4.22535	8444	0.67168	339898	20.6343	123623	1.92515	18028	1.03763	7008	0.172226	130449	71.1622	8739	0.171521
574	X	4	1	114	24.64	25.04	2152	4.48398	8879	0.702493	325435	19.6503	124633	1.93047	17697	1.01312	8433	0.206135	132337	71.8049	10689	0.208668
574	X	4	1	116	24.66	25.06	2392	4.79908	9439	0.719084	275809	16.0357	137340	2.04834	18496	1.01956	8096	0.190553	143485	74.9644	11877	0.223255
574	X	4	1	118	24.68	25.08	1956	3.97885	7905	0.610587	311561	18.366	106973	1.6176	15241	0.851806	6312	0.150627	140169	74.2493	9195	0.175242
574	X	4	1	120	24.7	25.1	2248	4.23952	8123	0.581693	416004	22.7353	110928	1.55514	15193	0.787231	5148	0.113896	142150	69.8102	10020	0.177046
574	X	4	1	122	24.72	25.12	2433	4.55284	9712	0.69009	476792	25.8554	134580	1.8721	20931	1.07614	6146	0.134921	134647	65.6127	11735	0.205741
574	X	4	1	124	24.74	25.14	1994	4.02387	8417	0.644959	447477	26.1681	108659	1.63002	16451	0.912114	5841	0.138278	126220	66.3282	8173	0.154525
574	X	4	1	126	24.76	25.16	2328	4.64852	9918	0.751991	459108	26.5662	127397	1.89104	20328	1.11523	8474	0.198504	124342	64.6549	9280	0.173611
574	X	4	1	128	24.78	25.18	2055	4.16119	9235	0.710067	479979	28.1651	116957	1.76052	18136	1.00899	141503	3.36139	115046	60.6637	8914	0.169113
574	X	4	1	130	24.8	25.2	2291	4.52914	10438	0.783546	483312	27.6886	134339	1.97424	20556	1.11652	53385	1.2381	121386	62.49	9713	0.179904
574	X	4	1	132	24.82	25.22	2393	4.73206	10056	0.755074	519868	29.7909	130736	1.92181	20362	1.10628	14249	0.330552	118806	61.1783	9986	0.185011
574	X	4	1	134	24.84	25.24	2164	4.45396	10996	0.859371	542744	32.3718	131517	2.01224	20394	1.15327	12039	0.290688	109447	58.6603	10285	0.198331
574	X	4	1	136	24.86	25.26	2452	4.69144	11136	0.809043	591556	32.7993	135904	1.93298	21621	1.13658	8794	0.197388	116906	58.247	10390	0.186251
574	X	4	1	138	24.88	25.28	2526	4.65309	11421	0.798856	625696	33.4006	136939	1.87518	21822	1.10444	8427	0.182108	120512	57.8082	10288	0.177557
574	X	4	1	140	24.9	25.3	2588	4.52866	9797	0.650962	677993	34.3806	133314	1.73416	22314	1.07281	7670	0.157452	125741	57.2973	10858	0.178014
574	X	4	1	142	24.92	25.32	2686	4.69925	11391	0.75673	683466	34.6515	134619	1.7508	21671	1.04169	6595	0.135358	124611	56.7715	11783	0.193142
574	X	4	1	144	24.94	25.34	2112	3.59447	9972	0.644436	756480	37.3096	119086	1.50664	20053	0.937688	7147	0.142696	125652	55.688	11068	0.176485
574	X	4	1	146	24.96	25.36	1990	4.14545	8853	0.700271	597162	36.0491	109042	1.68858	18839	1.07824	6348	0.155133	103263	56.0164	8548	0.166833
574	X	4	2	4	25.04	25.44	3359	5.19245	12550	0.736653	740560	33.1746	149845	1.72192	25596	1.08711	8847	0.160438	143351	57.7052	15302	0.22162
574	X	4	2	6	25.06	25.46	3353	5.15792	12756	0.745096	810477	36.1297	147598	1.68784	25637	1.08354	8300	0.149784	136888	54.835	14648	0.211114
574	X	4	2	8	25.08	25.48	3130	5.03347	10925	0.667116	828800	38.6239	134836	1.6119	23657	1.04525	6795	0.128192	125914	52.7289	10710	0.161365
574	X	4	2	10	25.1	25.5	2971	4.72623	11352	0.685712	935154	43.1101	130885	1.54779	22434	0.980523	7587	0.141589	117445	48.6517	10491	0.156361
574	X	4	2	12	25.12	25.52	3026	4.87626	11295	0.691132	900710	42.0616	130715	1.56586	22486	0.995563	6912	0.130668	118029	49.5288	9939	0.150058
574	X	4	2	14	25.14	25.54	2269	3.57062	7025	0.419771	907686	41.3931	92346	1.08028	17366	0.75084	7122	0.13148	128236	52.5498	7065	0.104164
574	X	4	2	16	25.16	25.56	2806	4.69874	10463	0.665283	910305	44.1737	120455	1.49943	21466	0.987605	6670	0.131029	109364	47.6891	9886	0.1551
574	X	4	2	18	25.18	25.58	2587	4.24598	9898	0.616859	702192	33.398	127942	1.561	21839	0.984812	6926	0.133356	137811	58.9003	10385	0.159693
574	X	4	2	20	25.2	25.6	2631	4.02108	10469	0.607553	1033930	45.7925	113143	1.28546	20799	0.87338	7065	0.126672	118505	47.164	9034	0.12936
574	X	4	2	22	25.22	25.62	2354	3.75926	9293	0.563519	1018080	47.115	105496	1.25239	19152	0.840326	6559	0.12288	111135	46.2166	8690	0.130021
574	X	4	2	24	25.24	25.64	2781	4.45361	11554	0.702587	989095	45.902	111836	1.33138	19444	0.855529	6690	0.125685	111499	46.4979	8753	0.131331
574	X	4	2	26	25.26	25.66	2983	4.50399	11728	0.672396	982614	42.9943	121880	1.368	22003	0.912777	7270	0.128774	125338	49.2809	9818	0.138888
574	X	4	2	28	25.28	25.68	2517	4.09255	8875	0.547944	715686	33.7223	113262	1.369	18619	0.831775	6643	0.126714	139736	59.1658	9449	0.143945
574	X	4	2	30	25.3	25.7	2503	3.74216	9633	0.546864	893654	38.7181	123543	1.37306	20063	0.82413	7267	0.127457	140055	54.527	10089	0.141321
574	X	4	2	32	25.32	25.72	3344	5.31691	11781	0.711266	895689	41.2699	142890	1.6889	24696	1.07884	7367	0.137414	119878	49.6346	10886	0.162166
574	X	4	2	34	25.34	25.74	2925	4.96385	11501	0.741115	876860	43.1227	138019	1.74117	23259	1.08448	7069	0.140734	108711	48.0417	10330	0.164245
574	X	4	2	36	25.36	25.76	2930	4.81934	9770	0.610198	856762	40.8378	128891	1.57598	23304	1.05315	6173	0.119114	118671	50.8295	10053	0.154922
574	X	4	2	38	25.38	25.78	2804	4.67024	10920	0.690622	933399	45.0517	116861	1.4469	20494	0.937834	6637	0.129682	108204	46.9306	9128	0.142441
574	X	4	2	40	25.4	25.8	2949	4.69511	11294	0.682772	951807	43.914	132251	1.56523	22810	0.99778	6961	0.130014	115424	47.854	10799	0.161084
574	X	4	2	42	25.42	25.82	2911	4.72536	12791	0.788413	890907	41.9091	149030	1.79835	25777	1.14964	7636	0.145414	116638	49.3042	11804	0.179523
574	X	4	2	44	25.44	25.84	1930	4.8869	7735	0.743693	577695	42.3895	91263	1.71783	12197	0.848531	4754	0.141216	74467	49.1012	7216	0.171187
574	X	4	2	46	25.46	25.86	2974	4.38766	12059	0.675554	1077270	46.0574	132231	1.45022	22822	0.92509	7895	0.136644	120366	46.2431	8995	0.124334
574	X	4	2	48	25.48	25.88	2620	4.11606	11687	0.697173	1025290	46.6778	128533	1.50108	21898	0.9452	7658	0.141138	111863	45.7634	10740	0.158082
574	X	4	2	50	25.5	25.9	2599	4.32684	11401	0.720716	914560	44.1225	142078	1.75833	23531	1.07632	7041	0.137514	109996	47.6862	11003	0.171622
574	X	4	2	52	25.52	25.92	3027	4.89491	12786	0.785098	948879	44.4658	145004	1.74309	23826	1.05858	7484	0.141976	110987	46.7364	11493	0.174126
574	X	4	2	54	25.54	25.94	2225	3.23368	10181	0.561843	1056950	44.5148	108397	1.1711	19264	0.769223	7386	0.125929	130795	49.5006	9020	0.122821
574	X	4	2	56	25.56	25.96	3051	4.80424	12747	0.762162	941339	42.9548	154294	1.80609	25849	1.11832	7264	0.134186	117643	48.2392	12270	0.181019
574	X	4	2	58	25.58	25.98	2975	4.75248	13221	0.801962	911627	42.202	146299	1.73733	25127	1.10284	7792	0.146026	118002	49.0878	11328	0.169545
574	X	4	2	60	25.6	26	3018	4.85128	12866	0.785303	885240	41.2364	149326	1.78435	25525	1.1273	8002	0.150898	119180	49.8875	11749	0.176944
574	X	4	2	62	25.62	26.02	2733	4.68313	12832	0.834926	873697	43.3851	138940	1.76983	22320	1.05082	7262	0.145982	107465	47.9529	11043	0.177289
574	X	4	2	64	25.64	26.04	2957	5.06297	12952	0.842068	849961	42.1731	151029	1.92231	24679	1.16097	7510	0.150849	108782	48.5023	11562	0.185475
574	X	4	2	66	25.66	26.06	2799	4.76773	12692	0.820911	841338	41.5301	155036	1.96314	24729	1.15732	7266	0.145195	111441	49.4317	11526	0.183944
574	X	4	2	68	25.68	26.08	3158	5.32605	12730	0.815227	808687	39.5236	158352	1.9853	25408	1.17734	8199	0.162219	115725	50.8243	11766	0.185917
574	X	4	2	70	25.7	26.1	2588	4.56488	12032	0.805861	851943	43.5471	142989	1.87489	22216	1.07664	8480	0.175473	104030	47.7832	10405	0.171951
574	X	4	2	74	25.74	26.14	3110	5.34395	13213	0.862104	801350	39.9031	174322	2.2267	26271	1.24027	9281	0.187087	111820	50.0348	12543	0.20193
574	X	4	2	76	25.76	26.16	2955	5.32604	10518	0.719842	727520	37.9992	152660	2.04541	24664	1.22137	7619	0.161099	111552	52.3571	10060	0.16988
574	X	4	2	78	25.78	26.18	2985	5.25091	12823	0.856518	750774	38.2721	175464	2.29449	27434	1.32592	8729	0.180137	112660	51.6073	12900	0.212607
574	X	4	2	80	25.8	26.2	3468	5.70515	12931	0.80775	814136	38.8122	169290	2.07028	28444	1.28563	8086	0.156052	118911	50.9403	14443	0.22261
574	X	4	2	82	25.82	26.22	3290	5.26472	12929	0.785599	834847	38.7141	165447	1.9681	27685	1.2172	7132	0.133887	124119	51.7213	13015	0.195129
574	X	4	2	84	25.84	26.24	2895	5.00863	11174	0.734067	802723	40.2457	151888	1.95345	25443	1.20942	6349	0.128862	112171	50.5362	11335	0.183734
574	X	4	2	86	25.86	26.26	3036	5.48077	12598	0.863571	738167	38.6169	162306	2.17813	25789	1.27912	7139	0.151191	108927	51.2067	13220	0.223599
574	X	4	2	88	25.88	26.28	2632	4.77174	13334	0.917926	706390	37.1123	176491	2.3786	28273	1.40832	7646	0.162619	112168	52.9555	17251	0.293024
574	X	4	2	90	25.9	26.3	2469	4.64228	12885	0.919923	723408	39.4164	178989	2.50176	28053	1.4492	8185	0.180541	103421	50.6373	14340	0.252614
574	X	4	2	92	25.92	26.32	2251	4.06648	10949	0.75106	801388	41.9536	129601	1.74044	20543	1.01964	6000	0.127158	106618	50.1563	10953	0.185385
574	X	4	2	94	25.94	26.34	2285	4.32405	10778	0.774461	753060	41.2969	145773	2.05065	23327	1.21284	6546	0.145321	101417	49.9766	12361	0.219158
574	X	4	2	96	25.96	26.36	2440	4.50953	11501	0.807113	801343	42.9184	159458	2.19077	24134	1.22549	7415	0.160768	99660	47.9638	12943	0.224117
574	X	4	2	98	25.98	26.38	2691	4.99238	12678	0.893103	776780	41.7614	173830	2.39733	25353	1.2923	8250	0.179554	99850	48.2385	14124	0.245499
574	X	4	2	100	26	26.4	2790	5.29608	13667	0.985101	673585	37.0532	190623	2.68989	26834	1.3995	8405	0.18717	105370	52.0858	17052	0.303266
574	X	4	2	102	26.02	26.42	2656	5.40426	13227	1.02194	624723	36.8365	185371	2.80388	25184	1.4079	8640	0.206239	98213	52.039	14701	0.280255
574	X	4	2	104	26.04	26.44	3190	5.76632	13527	0.928466	668520	35.0191	198874	2.67236	28934	1.43699	8898	0.18869	114091	53.7045	16743	0.283556
574	X	4	2	106	26.06	26.46	3607	6.78884	14631	1.04564	497768	27.1493	193900	2.71291	30364	1.57017	11881	0.262331	122781	60.1772	16647	0.293551
574	X	4	2	108	26.08	26.48	3252	6.92272	14602	1.18031	273758	16.8879	211047	3.33975	32077	1.87611	27257	0.680694	123968	68.7206	19649	0.39189
574	X	4	2	110	26.1	26.5	3139	6.74424	14714	1.20041	253046	15.7552	206805	3.30302	31561	1.86308	27541	0.694176	125218	70.0584	18950	0.38146
574	X	4	2	112	26.12	26.52	3115	6.62547	14304	1.15524	312240	19.2455	197165	3.11743	30032	1.75502	22453	0.560249	121346	67.2102	16601	0.330819
574	X	4	2	114	26.14	26.54	3248	6.54651	14669	1.12267	344016	20.0935	199296	2.98608	31024	1.71803	25083	0.59309	126917	66.6139	17277	0.326257
574	X	4	2	116	26.16	26.56	3554	7.43114	14880	1.1814	286018	17.3306	202131	3.14181	31308	1.79859	32956	0.808389	124823	67.9648	17519	0.343199
574	X	4	2	118	26.18	26.58	3397	6.86187	14193	1.08862	345754	20.2394	196839	2.95574	30707	1.70421	31774	0.752951	125643	66.0901	16228	0.307121
574	X	4	2	120	26.2	26.6	3384	7.0981	13262	1.05628	285863	17.3761	200162	3.12106	31230	1.79979	40668	1.00072	124866	68.2036	17519	0.344286
574	X	4	2	122	26.22	26.62	3038	6.9028	13232	1.14162	230676	15.1888	207266	3.50086	30418	1.89892	48147	1.28338	117873	69.7434	15982	0.340225
574	X	4	2	124	26.24	26.64	2851	6.59892	13370	1.17507	255691	17.1504	203603	3.50323	28683	1.82406	45179	1.22676	113139	68.193	15152	0.328582
574	X	4	2	128	26.28	26.68	3274	7.62527	12384	1.0952	263633	17.7934	175855	3.04467	26912	1.72211	29225	0.798507	111515	67.6334	13174	0.28747
574	X	4	2	130	26.3	26.7	2728	6.43293	11839	1.06007	283562	19.3774	167429	2.93497	26129	1.69288	20091	0.555793	110220	67.6824	11929	0.263552
574	X	4	2	132	26.32	26.72	3010	7.43494	11099	1.041	236967	16.9622	165251	3.03434	25150	1.70682	16985	0.49218	107360	69.0566	11752	0.27197
574	X	4	2	134	26.34	26.74	3018	6.85561	13492	1.16375	267354	17.5993	183734	3.10259	28481	1.77754	22001	0.586296	116021	68.6301	13379	0.28474
574	X	4	2	136	26.36	26.76	3365	7.18865	13674	1.10921	293304	18.1578	189295	3.00615	29265	1.71771	22098	0.553813	122201	67.9811	14265	0.285517
574	X	4	2	138	26.38	26.78	3076	6.26778	13609	1.05296	391984	23.1461	187556	2.84097	29639	1.65932	18928	0.45246	121141	64.2791	15780	0.301254
574	X	4	2	140	26.4	26.8	3027	6.32212	14612	1.15882	342099	20.7055	193831	3.00942	30130	1.72897	22835	0.559499	121717	66.1993	16169	0.316397
574	X	4	2	142	26.42	26.82	3573	7.29375	14523	1.12572	309355	18.3003	201923	3.06416	32353	1.81456	28014	0.670873	126761	67.3837	18143	0.346996
574	X	4	2	144	26.44	26.84	3345	7.25843	14179	1.16829	258920	16.2815	201921	3.25714	30755	1.83358	37260	0.9485	121876	68.8678	18922	0.384691
574	X	4	2	146	26.46	26.86	3141	7.3887	12487	1.11536	247046	16.8407	187067	3.27119	29063	1.87836	32850	0.906532	111466	68.28	14479	0.319107
574	X	4	2	148	26.48	26.88	2736	6.84568	11107	1.05525	235351	17.0647	167308	3.1119	26680	1.83411	43044	1.26346	105190	68.5372	12269	0.287613
574	X	4	3	4	26.54	26.94	4948	7.74524	15654	0.930438	329364	14.9405	224970	2.61781	37241	1.60164	75862	1.39308	172961	70.5025	18327	0.268779
574	X	4	3	6	26.56	26.96	4645	6.25907	15232	0.77936	886089	34.6007	207922	2.08273	34417	1.27419	22225	0.351329	155188	54.4545	15695	0.198145
574	X	4	3	8	26.58	26.98	2916	3.65815	12688	0.604399	1503440	54.6566	137333	1.28073	24819	0.855454	27441	0.403852	117479	38.3783	13829	0.162541
574	X	4	3	10	26.6	27	2966	4.13291	12069	0.638576	1293360	52.2262	133209	1.37983	23862	0.913545	32350	0.528818	110366	40.0471	10189	0.133019
574	X	4	3	12	26.62	27.02	3394	4.94397	13367	0.739358	1122990	47.4047	141182	1.5288	25688	1.02809	28706	0.490551	115246	43.7161	10877	0.148447
574	X	4	3	14	26.64	27.04	3137	4.44679	12657	0.68127	1155220	47.4546	139178	1.4666	25916	1.00934	27914	0.464196	120128	44.3432	10087	0.133965
574	X	4	3	16	26.66	27.06	3506	5.54623	14520	0.872186	842366	38.6162	165611	1.94753	27650	1.20176	41914	0.777844	123427	50.8449	13045	0.193343
574	X	4	3	18	26.68	27.08	3996	5.66799	13171	0.709381	967516	39.769	165206	1.74196	29477	1.14875	46301	0.770446	135424	50.0208	12915	0.171631
574	X	4	3	20	26.7	27.1	3456	5.09752	12523	0.701376	980312	41.9018	157565	1.72764	27936	1.13211	39425	0.682189	126452	48.5694	13602	0.187969
574	X	4	3	22	26.72	27.12	3727	5.30993	12597	0.68148	1035390	42.7482	152149	1.61141	27192	1.06441	39631	0.662388	128768	47.7737	11124	0.148487
574	X	4	3	24	26.74	27.14	4034	5.75303	13536	0.733006	958793	39.6249	167160	1.77215	29578	1.15896	41997	0.70263	134848	50.0791	13188	0.176213
574	X	4	3	26	26.76	27.16	3888	5.58861	13402	0.731482	946772	39.4372	170339	1.82012	28946	1.14315	44758	0.754737	134468	50.3324	14280	0.192311
574	X	4	3	28	26.78	27.18	3879	5.16042	14090	0.711759	1030660	39.7341	171040	1.6915	30780	1.12505	44309	0.69152	146368	50.7064	14387	0.179322
574	X	4	3	30	26.8	27.2	3525	5.04762	14252	0.774925	997065	41.3746	163921	1.7449	29471	1.15947	40090	0.673459	131548	49.0527	12848	0.17237
574	X	4	3	32	26.82	27.22	3615	5.35761	13458	0.757356	990702	42.549	154534	1.70253	27117	1.10419	38373	0.66717	123599	47.7012	11595	0.161002
574	X	4	3	34	26.84	27.24	3629	5.391	13291	0.749717	1003910	43.2175	150239	1.65911	27027	1.10311	36460	0.6354	121736	47.0926	10884	0.151485
574	X	4	3	36	26.86	27.26	3309	5.1852	13225	0.786903	924547	41.9837	155516	1.81156	26444	1.1385	37435	0.688167	118225	48.2424	11141	0.163565
574	X	4	3	38	26.88	27.28	3489	5.1081	13662	0.759503	975355	41.3813	161694	1.75979	28197	1.13423	40421	0.694245	128497	48.9895	12642	0.173409
574	X	4	3	40	26.9	27.3	3385	5.37887	13967	0.842737	880184	40.5311	164961	1.9486	27130	1.18446	42396	0.790323	118773	49.1475	11851	0.176435
574	X	4	3	42	26.92	27.32	3276	5.19013	14159	0.851772	917692	42.1322	157008	1.84912	25939	1.12908	40077	0.744864	116151	47.9191	12382	0.18379
574	X	4	3	44	26.94	27.34	3205	5.14237	13301	0.810356	917777	42.6732	154195	1.83914	24586	1.08383	40667	0.765464	113691	47.5021	12214	0.183608
574	X	4	3	46	26.96	27.36	3550	5.23342	13879	0.776912	969164	41.4035	167117	1.83141	27429	1.11098	48006	0.830233	126678	48.6306	13247	0.182967
574	X	4	3	48	26.98	27.38	3175	5.12448	14481	0.887486	871267	40.7512	164124	1.96919	27027	1.19851	48485	0.91804	116501	48.9652	12293	0.185893
574	X	4	3	50	27	27.4	3514	5.11856	13443	0.74353	996605	42.068	157270	1.70294	28259	1.13094	44961	0.768298	127399	48.324	10529	0.143692
574	X	4	3	52	27.02	27.42	3594	5.72253	13403	0.810343	831566	38.3698	162404	1.92228	27947	1.2226	47928	0.895256	122697	50.874	12280	0.183192
574	X	4	3	54	27.04	27.44	3498	5.39421	13262	0.776558	876131	39.1525	158184	1.81334	28183	1.19408	45817	0.828862	126172	50.6667	12024	0.173722
574	X	4	3	56	27.06	27.46	3017	5.7195	11673	0.840276	637496	35.0222	155230	2.1876	26183	1.36377	48306	1.07432	108554	53.5895	11419	0.202819
574	X	4	3	58	27.08	27.48	3588	6.34396	12874	0.864328	589937	30.2271	176117	2.31482	29601	1.43798	55442	1.14999	124767	57.4459	13031	0.215866
574	X	4	3	60	27.1	27.5	3516	6.0068	12000	0.778453	647219	32.0427	170899	2.17041	29034	1.36282	51043	1.02301	126816	56.4183	12342	0.197551
574	X	4	3	62	27.12	27.52	3356	5.90503	12133	0.810634	717161	36.5679	161250	2.10915	26646	1.28816	32646	0.673872	114499	52.463	11058	0.182295
574	X	4	3	64	27.14	27.54	3331	5.9926	11027	0.753277	639536	33.3418	160187	2.14228	27924	1.38025	62572	1.32059	117154	54.8844	10966	0.184836
574	X	4	3	66	27.16	27.56	3811	6.97446	11841	0.822842	555062	29.4372	172683	2.34925	29011	1.45872	57211	1.22828	120712	57.5272	11786	0.202086
574	X	4	3	68	27.18	27.58	3323	5.49651	10814	0.679203	791778	37.9527	159956	1.96682	27071	1.23027	26527	0.514745	120702	51.9903	10935	0.169462
574	X	4	3	70	27.2	27.6	3391	5.67355	9468	0.601509	762762	36.9827	152265	1.89381	26543	1.22016	9700	0.190391	122285	53.2785	10166	0.159359
574	X	4	3	72	27.22	27.62	3244	5.33053	11084	0.69158	806101	38.385	156491	1.91156	28114	1.26926	8137	0.156856	121729	52.0877	10882	0.167531
574	X	4	3	74	27.24	27.64	3170	5.5134	9594	0.633602	785271	39.5788	145478	1.8809	24480	1.1698	6922	0.141234	112441	50.9256	9613	0.156645
574	X	4	3	76	27.26	27.66	3351	5.36934	10562	0.642613	859968	39.9312	156795	1.86762	27260	1.20008	7763	0.145923	121446	50.6735	11305	0.169713
574	X	4	3	78	27.28	27.68	3039	5.11281	12759	0.815084	772787	37.6766	158464	1.98184	26943	1.24541	9365	0.184835	120512	52.7972	11818	0.186282
574	X	4	3	80	27.3	27.7	3305	5.18441	11936	0.710957	846526	38.4814	158837	1.8522	27008	1.16402	9298	0.171106	127958	52.2693	11336	0.166604
574	X	4	3	82	27.32	27.72	3423	5.89105	12648	0.826541	592884	29.5691	175058	2.23963	29264	1.38375	8924	0.180174	133226	59.7071	12566	0.202619
574	X	4	3	84	27.34	27.74	3442	6.48244	13159	0.941038	494071	26.965	175294	2.45416	29682	1.53589	14256	0.314973	124543	61.0799	12844	0.226635
574	X	4	3	86	27.36	27.76	2967	6.01035	11771	0.905424	493850	28.9908	160545	2.41762	27006	1.50307	16636	0.395347	112916	59.5647	11208	0.21272
574	X	4	3	88	27.38	27.78	2957	6.20277	11741	0.935182	373062	22.6777	169232	2.63891	28646	1.65096	21042	0.517808	119238	65.1329	12408	0.243856
574	X	4	3	90	27.4	27.8	3330	6.3353	10923	0.789081	419406	23.1228	159349	2.25362	27089	1.41597	16167	0.360828	132254	65.5214	11274	0.200955
574	X	4	3	92	27.42	27.82	3578	7.11499	12984	0.98039	441780	25.4579	174061	2.57302	29084	1.58901	23623	0.551083	118755	61.4946	12827	0.238978
574	X	4	3	94	27.44	27.84	3491	6.89235	11940	0.895115	392314	22.4458	177203	2.60074	29668	1.60933	22446	0.519882	126022	64.7911	13282	0.245685
574	X	4	3	96	27.46	27.86	3514	6.04041	12532	0.817978	640215	31.8914	165292	2.11215	29755	1.40528	22138	0.446427	127528	57.0849	12509	0.201458
574	X	4	3	98	27.48	27.88	3477	6.36057	11601	0.80583	545560	28.9212	172881	2.35097	29156	1.46541	20671	0.443609	124774	59.4384	12485	0.213982
574	X	4	3	100	27.5	27.9	3432	5.94495	13472	0.886115	700894	35.1833	163052	2.0996	27976	1.33145	25654	0.521319	119357	53.8394	11946	0.193875
574	X	4	3	102	27.52	27.92	3014	5.25953	12448	0.824822	766422	38.7574	147782	1.91705	26736	1.28185	23115	0.473201	112929	51.3169	10349	0.1692
574	X	4	3	104	27.54	27.94	3442	6.05342	13365	0.892515	654218	33.3423	168944	2.20872	28757	1.38954	32500	0.670534	120611	55.2367	12519	0.20628
574	X	4	3	106	27.56	27.96	3011	5.41035	13466	0.918776	658673	34.2979	164384	2.19575	28849	1.42424	30215	0.63692	117352	54.9106	12205	0.205471
574	X	4	3	108	27.58	27.98	3697	7.29382	12926	0.968337	402886	23.0341	184577	2.70702	30581	1.65766	29646	0.686151	123427	63.4114	13067	0.241535
574	X	4	3	110	27.6	28	3450	6.06805	12555	0.838501	615772	31.3858	165805	2.16788	29832	1.44162	32689	0.674496	124926	57.2182	12470	0.205492
574	X	4	3	112	27.62	28.02	3392	6.26029	12147	0.851264	582876	31.1744	157426	2.15985	28142	1.42703	33252	0.719953	119027	57.2052	11688	0.202105
574	X	4	3	114	27.64	28.04	3212	5.97438	12281	0.867376	584823	31.5228	157033	2.17128	27588	1.40986	47374	1.03372	117303	56.8169	11688	0.203683
574	X	4	3	116	27.66	28.06	3497	6.5177	11227	0.794546	557231	30.0966	157310	2.17953	27708	1.41887	35135	0.768221	119546	58.021	11660	0.203608
574	X	4	3	118	27.68	28.08	2898	6.19304	12012	0.974715	442800	27.4218	148306	2.35599	25285	1.48459	36047	0.903696	108620	60.4459	11002	0.22028
574	X	4	3	120	27.7	28.1	3018	6.48063	12561	1.02419	434717	27.0513	149178	2.38129	26068	1.53796	40540	1.02124	107773	60.2642	11888	0.239169
574	X	4	3	122	27.72	28.12	2960	6.1996	11574	0.920476	444751	26.9943	155898	2.42729	26613	1.53146	24669	0.606138	112016	61.0947	11520	0.226059
574	X	4	3	124	27.74	28.14	3156	6.66864	10755	0.862914	458795	28.0932	146028	2.29374	25122	1.45845	19752	0.48962	108907	59.9249	10531	0.208482
574	X	4	3	126	27.76	28.16	3072	6.48199	11378	0.911612	422283	25.821	147275	2.31007	26158	1.51646	37680	0.932709	112455	61.7899	11949	0.23622
574	X	4	3	128	27.78	28.18	2872	6.06586	11463	0.919312	502872	30.7785	134812	2.11663	23669	1.37349	53847	1.33419	103997	57.1979	10819	0.214088
574	X	4	3	130	27.8	28.2	2920	6.65051	11008	0.952001	395149	26.0805	142994	2.42102	24718	1.54676	41854	1.1183	102854	61.0021	10721	0.228774
574	X	4	3	132	27.82	28.22	2825	6.37421	10482	0.898067	425108	27.7965	136334	2.28676	23803	1.47563	26782	0.708923	102538	60.2482	10013	0.211675
574	X	4	3	134	27.84	28.24	2718	6.0375	9919	0.836628	508220	32.7147	128428	2.12068	22391	1.36653	37480	0.976686	96368	55.7432	9807	0.2041
574	X	4	3	136	27.86	28.26	2054	5.14412	8020	0.76268	525505	38.1391	98065	1.82572	17020	1.17114	30388	0.892814	79556	51.8842	7678	0.18016
574	X	4	3	140	27.9	28.3	3381	5.52964	13860	0.860739	781046	37.0178	154248	1.87534	27636	1.24184	56070	1.0758	122542	52.1901	13622	0.208733
574	X	4	3	142	27.92	28.32	2834	4.90045	12641	0.829993	794879	39.8309	143028	1.83851	25289	1.20145	61141	1.24027	110947	49.9578	12384	0.20063
574	X	4	4	2	28.02	28.42	1879	3.59899	6729	0.489397	918394	50.976	82033	1.16802	16489	0.867734	38344	0.861587	84042	41.9181	6694	0.120126
574	X	4	4	4	28.04	28.44	3319	4.23484	11718	0.567727	1257320	46.4899	134674	1.27738	26308	0.922264	26115	0.390901	138340	45.9651	12706	0.151892
574	X	4	4	6	28.06	28.46	3263	4.39466	9655	0.493762	1152600	44.9854	128078	1.28231	25204	0.932645	13175	0.208165	135656	47.5772	9974	0.125857
574	X	4	4	8	28.08	28.48	1863	3.65508	8006	0.596426	874588	49.7245	93233	1.35976	15821	0.852819	17072	0.392931	84724	43.2855	7233	0.132954
574	X	4	4	10	28.1	28.5	3449	5.01707	12010	0.663371	1008770	42.5237	141606	1.53125	26935	1.0765	45838	0.782223	127391	48.2555	11033	0.150366
574	X	4	4	12	28.12	28.52	2957	4.54492	11791	0.688148	953607	42.4744	124093	1.41785	23165	0.978239	38494	0.694089	122604	49.0716	9081	0.130769
574	X	4	4	14	28.14	28.54	2748	4.1133	9910	0.563254	1088430	47.2127	123121	1.36998	23202	0.954196	11007	0.193282	116671	45.4766	8323	0.116722
574	X	4	4	18	28.18	28.58	3389	5.57846	13846	0.865414	735504	35.0841	156573	1.91588	28130	1.27219	20631	0.398392	127588	54.6895	12708	0.195983
574	X	4	4	20	28.2	28.6	2924	4.18059	9244	0.501854	1128110	46.7407	127728	1.35755	21601	0.848541	8993	0.150839	123794	46.0905	9662	0.129427
574	X	4	4	22	28.22	28.62	3620	5.54976	13871	0.807477	877058	38.9652	157175	1.79126	28788	1.21259	7953	0.143036	128635	51.3542	12284	0.176443
574	X	4	4	24	28.24	28.64	3228	5.06079	13019	0.77503	913080	41.4836	142247	1.65782	26213	1.12912	7116	0.130878	121511	49.608	10541	0.154833
574	X	4	4	28	28.28	28.68	3129	4.50618	13263	0.725274	1184130	49.4182	129552	1.38694	24735	0.978709	7160	0.120966	113920	42.7223	10482	0.141431
574	X	4	4	30	28.3	28.7	2472	3.70298	10778	0.613053	1220150	52.9664	115448	1.28558	22225	0.914709	5978	0.105053	103300	40.2953	8334	0.116965
574	X	4	4	32	28.32	28.72	2800	4.0663	8464	0.466738	1224520	51.5334	116499	1.25768	21796	0.869673	6300	0.107332	109960	41.5841	8439	0.114823
574	X	4	4	34	28.34	28.74	2231	3.09891	10187	0.537295	1524730	61.3741	96430	0.995704	19345	0.738272	6782	0.110513	91372	33.0502	7304	0.0950536
574	X	4	4	36	28.36	28.76	1972	2.59332	9094	0.45411	1743550	66.4455	79816	0.780275	16169	0.584212	7598	0.117219	84536	28.9496	6148	0.0757498
574	X	4	4	38	28.38	28.78	1924	2.35106	9993	0.463673	1880260	66.5825	84358	0.766292	17540	0.588881	8895	0.127513	91272	29.0434	6691	0.0766035
574	X	4	4	40	28.4	28.8	1896	2.40852	11557	0.55746	1675070	61.6634	97842	0.923945	19498	0.680519	9619	0.143347	101331	33.5201	8623	0.102629
574	X	4	4	42	28.42	28.82	2301	3.6375	9561	0.573914	1140050	52.2266	102490	1.20442	19847	0.862025	7409	0.137402	100193	41.2454	7615	0.112786
574	X	4	4	44	28.44	28.84	1842	2.44468	7344	0.370103	1535810	59.0681	83590	0.8247	14422	0.525892	7911	0.123172	105772	36.5557	7046	0.087614
574	X	4	4	46	28.46	28.86	1538	1.88542	6510	0.303032	1902430	67.5838	77795	0.708944	14706	0.495318	9982	0.143554	90195	28.7929	7580	0.08706
574	X	4	4	48	28.48	28.88	2590	3.60067	12888	0.68034	1336510	53.8442	118419	1.22381	22044	0.842	10677	0.174133	109074	39.4872	11339	0.147692
574	X	4	4	50	28.5	28.9	3350	5.22168	15593	0.922895	862258	38.9481	152654	1.76882	25566	1.09488	19714	0.360486	126822	51.4768	14129	0.206336
574	X	4	4	52	28.52	28.92	3129	4.86837	14940	0.882644	891923	40.215	147445	1.70536	25334	1.08298	36371	0.663867	124289	50.3573	15398	0.224461
574	X	4	4	54	28.54	28.94	2252	3.30049	11486	0.639198	1212570	51.4992	109838	1.19666	19553	0.787338	11435	0.196605	110703	42.2494	9547	0.131092
574	X	4	4	56	28.56	28.96	3362	5.67808	16084	1.03147	580937	28.4325	169853	2.13248	30043	1.39407	93331	1.84917	134634	59.212	17074	0.27017
574	X	4	4	58	28.58	28.98	3326	6.04679	15068	1.04019	547565	28.8483	160200	2.16508	26333	1.31535	47575	1.01468	125256	59.2997	15845	0.269894
574	X	4	4	60	28.6	29	3363	5.43362	13849	0.849645	789647	36.9724	154255	1.85272	26124	1.15969	17306	0.328025	126462	53.2076	12965	0.196261
574	X	4	4	62	28.62	29.02	3620	6.05342	14176	0.900125	570397	27.6409	173113	2.15194	29745	1.36661	8159	0.160058	141227	61.498	14610	0.228897
574	X	4	4	64	28.64	29.04	3450	5.8567	12771	0.823219	582819	28.6715	179906	2.27032	29569	1.37914	6677	0.132973	137168	60.637	14408	0.229158
574	X	4	4	66	28.66	29.06	2858	4.35717	12280	0.710883	1024540	45.264	136536	1.54739	23632	0.989878	7289	0.130364	117982	46.8392	11280	0.16112
574	X	4	4	68	28.68	29.08	2780	4.08443	12812	0.714759	1133360	48.2544	126244	1.37881	23309	0.94091	7178	0.123719	115956	44.364	10098	0.139002
574	X	4	4	70	28.7	29.1	3195	4.70945	11637	0.651324	1044790	44.6282	133612	1.46404	24603	0.996382	6480	0.112053	123230	47.3007	9980	0.137825
574	X	4	4	72	28.72	29.12	2815	4.28555	13046	0.754157	1086040	47.9134	125048	1.41519	22974	0.960955	6891	0.123072	111992	44.3983	10471	0.149353
574	X	4	4	74	28.74	29.14	2937	4.29236	12168	0.675256	1095600	46.4009	130882	1.42194	23692	0.951333	6971	0.119519	120778	45.9655	12647	0.173172
574	X	4	4	76	28.76	29.16	2895	4.29987	9904	0.558565	1122380	48.3093	125425	1.38484	23134	0.944051	7333	0.127772	114273	44.1979	12773	0.177745
574	X	4	4	78	28.78	29.18	2724	3.91179	13125	0.71569	1212880	50.4742	125750	1.34241	22872	0.902425	14331	0.241431	112982	42.2502	12027	0.161817
574	X	4	4	80	28.8	29.2	2789	3.97586	12621	0.683176	1227250	50.6988	119954	1.27118	23009	0.901194	12075	0.201938	113428	42.107	12046	0.160888
574	X	4	4	82	28.82	29.22	2762	4.01838	12956	0.71574	1190320	50.1851	122637	1.32635	22903	0.915499	11614	0.198224	112175	42.4986	10425	0.142102
574	X	4	4	84	28.84	29.24	2593	3.99354	13096	0.765863	1048470	46.7947	129371	1.48116	23478	0.993471	14957	0.270239	113532	45.5329	11655	0.168177
574	X	4	4	86	28.86	29.26	2493	3.70397	13102	0.739161	1143330	49.2266	121021	1.33664	22488	0.917981	14131	0.246301	112922	43.6893	10067	0.140134
574	X	4	4	88	28.88	29.28	2235	3.17088	11616	0.625771	1323030	54.3943	106504	1.12325	19909	0.77605	11667	0.194182	107182	39.5982	8832	0.117398
574	X	4	4	90	28.9	29.3	3079	4.5141	12974	0.722258	1105650	46.9745	127264	1.387	24664	0.993491	12759	0.219445	117997	45.0489	10212	0.140272
574	X	4	4	92	28.92	29.32	2585	4.06775	9835	0.587658	1065830	48.6032	118892	1.39077	20822	0.900233	10000	0.184604	107706	44.1352	8854	0.130536
574	X	4	4	94	28.94	29.34	2955	4.74231	13695	0.834548	915761	42.589	138793	1.6558	25228	1.11238	21421	0.403292	116041	48.4948	11165	0.167876
574	X	4	4	96	28.96	29.36	3057	4.72392	14862	0.872049	927808	41.5478	137985	1.58507	25751	1.0933	24903	0.451447	123149	49.5552	11824	0.171187
574	X	4	4	98	28.98	29.38	3207	5.40846	13934	0.892293	768934	37.5791	141637	1.77566	24954	1.15625	26658	0.527412	119426	52.4475	13495	0.213229
574	X	4	4	100	29	29.4	3109	4.86328	12376	0.735099	836845	37.9347	141439	1.6447	24983	1.07372	23553	0.432218	130427	53.1285	12812	0.187769
574	X	4	4	102	29.02	29.42	3446	5.23377	13907	0.802028	876166	38.5628	141323	1.59559	25723	1.07339	14714	0.262167	132192	52.2824	13197	0.18779
574	X	4	4	104	29.04	29.44	3158	4.98825	14497	0.869504	925349	42.357	133456	1.56705	23399	1.01548	17763	0.329155	118309	48.6638	14178	0.209821
574	X	4	4	106	29.06	29.46	3635	5.09542	14225	0.757154	1016310	41.2843	148172	1.54401	27988	1.07792	26304	0.432558	135915	49.6128	14910	0.195817
574	X	4	4	108	29.08	29.48	3205	4.80331	13538	0.770413	928155	40.3103	142311	1.58548	28435	1.17086	36705	0.645335	129527	50.5503	11678	0.163976
574	X	4	4	110	29.1	29.5	3514	5.1939	12450	0.698744	982128	42.0672	136250	1.49705	27432	1.11401	27810	0.482215	126778	48.7964	10873	0.15057
574	X	4	4	112	29.12	29.52	4197	6.37933	15162	0.875084	698299	30.7582	178529	2.01722	33281	1.38986	27338	0.487473	146208	57.8707	15597	0.222114
574	X	4	4	114	29.14	29.54	3504	4.91194	13934	0.741689	964934	39.1985	154818	1.61332	28722	1.10622	24486	0.402675	142037	51.8492	13435	0.176451
574	X	4	4	116	29.16	29.56	3649	4.95604	16424	0.847025	1011580	39.8147	148435	1.49867	28092	1.04829	37672	0.600243	144348	51.0532	14291	0.181853
574	X	4	4	118	29.18	29.58	3330	4.70426	13842	0.74251	974605	39.8987	145489	1.52787	27444	1.0652	21989	0.364418	140012	51.5067	14384	0.190382
574	X	4	4	120	29.2	29.6	3719	5.5542	15195	0.861693	820341	35.5036	151654	1.68367	28154	1.15524	26595	0.465954	140375	54.5929	13059	0.182727
574	X	4	4	122	29.22	29.62	4017	5.70172	14224	0.766624	841121	34.5976	161179	1.70067	30454	1.18765	31866	0.530615	149704	55.3336	13652	0.181551
574	X	4	4	124	29.24	29.64	3961	5.82901	13999	0.782246	808527	34.48	166822	1.82495	30093	1.21673	9796	0.169117	144838	55.5039	14074	0.194046
574	X	4	4	126	29.26	29.66	3614	4.78809	10351	0.520731	1136790	43.6452	128935	1.26985	24889	0.905983	7838	0.121822	140886	48.6064	11433	0.141916
574	X	4	4	132	29.32	29.72	2495	4.62127	10208	0.71794	662856	35.5789	150518	2.07247	26742	1.36089	7308	0.158795	114671	55.309	10411	0.180668
574	X	4	4	134	29.34	29.74	2258	4.5298	14267	1.08679	670063	38.9542	146575	2.18587	24965	1.37602	13426	0.315973	98276	51.3398	11258	0.2116
574	X	4	4	136	29.36	29.76	2235	4.3354	13691	1.00843	711163	39.9764	143968	2.076	25545	1.36143	19401	0.441493	100191	50.6095	10528	0.191336
574	X	4	4	138	29.38	29.78	2486	4.66832	13449	0.958972	753282	40.9921	139887	1.95274	24911	1.28525	16310	0.359303	101411	49.5902	10979	0.193161
574	X	4	4	140	29.4	29.8	2234	4.537	14189	1.09419	645053	37.9633	141885	2.14205	24746	1.38079	27460	0.654235	98272	51.9717	13496	0.256796
574	X	4	4	142	29.42	29.82	2643	5.02517	14101	1.01803	712897	39.2793	139509	1.97181	25476	1.33083	27646	0.616643	102054	50.5284	12902	0.229831
574	X	4	4	144	29.44	29.84	2542	4.69909	12857	0.902474	743174	39.8118	138688	1.90584	24669	1.25293	20230	0.438715	105467	50.7699	12657	0.219214
574	X	4	5	10	29.6	30	3697	5.35174	14579	0.801364	946060	39.6869	151088	1.62586	30617	1.21772	21966	0.37303	134760	50.7993	10628	0.144143
574	X	4	5	12	29.62	30.02	3626	4.56831	14352	0.68659	1153250	42.105	152119	1.42469	31756	1.09924	21112	0.312036	151388	49.6673	11592	0.136831
574	X	4	5	14	29.64	30.04	3199	4.43308	13883	0.730519	1186490	47.6473	135507	1.39592	27497	1.04692	21911	0.356206	122628	44.252	10636	0.138092
574	X	4	5	18	29.68	30.08	3108	3.74357	12155	0.555926	1481880	51.7251	121788	1.09048	25961	0.859143	20214	0.285631	132725	41.6303	9734	0.109849
574	X	4	5	20	29.7	30.1	3571	4.57002	12381	0.601645	1242650	46.0849	135413	1.28824	27372	0.962438	19722	0.296092	138240	46.0695	10612	0.12724
574	X	4	5	22	29.72	30.12	3027	3.45829	11681	0.506741	1697200	56.1908	116184	0.986744	24933	0.78264	19296	0.258621	126767	37.7144	9512	0.101817
574	X	4	5	24	29.74	30.14	3020	3.53628	13045	0.580017	1697320	57.5951	115463	1.00506	23998	0.772064	20783	0.285493	118439	36.1149	10132	0.111156
574	X	4	5	26	29.76	30.16	2922	3.67331	13516	0.645181	1548350	56.4065	112676	1.05297	22436	0.774927	23276	0.343268	112995	36.9903	9644	0.113588
574	X	4	5	28	29.78	30.18	2475	3.02222	11263	0.52223	1586960	56.1566	114492	1.03928	21608	0.724943	10903	0.156187	120399	38.2847	8203	0.0938473
574	X	4	5	30	29.8	30.2	3596	4.48926	15454	0.732576	1231100	44.538	170457	1.5819	30855	1.05832	10938	0.160192	145451	47.285	13230	0.154744
574	X	4	5	32	29.82	30.22	2484	2.74423	8811	0.369616	1869860	59.8633	95305	0.782697	19986	0.606643	8667	0.112327	123198	35.4425	7601	0.0786752
574	X	4	5	34	29.84	30.24	3107	4.76701	15230	0.887282	900264	40.0275	160181	1.82694	28544	1.20326	12051	0.216908	127369	50.8886	12700	0.182561
574	X	4	5	36	29.86	30.26	3790	5.27951	15888	0.840389	881789	35.5961	185447	1.92036	34329	1.31388	17987	0.293942	150474	54.5843	13146	0.171572
574	X	4	5	38	29.88	30.28	4158	5.98964	16809	0.919422	825866	34.4754	190841	2.0436	35225	1.39414	20392	0.344607	145635	54.6303	15039	0.202971
574	X	4	5	40	29.9	30.3	4111	6.15493	15526	0.882656	734532	31.869	188093	2.09342	34365	1.41361	27077	0.47558	145954	56.904	14740	0.206762
574	X	4	5	42	29.92	30.32	4162	5.98862	13122	0.716938	788578	32.8816	172070	1.84051	32589	1.28835	21627	0.365064	151431	56.7402	13260	0.178758
574	X	4	5	44	29.94	30.34	3147	4.02866	12007	0.583654	1462230	54.2456	132230	1.25835	25153	0.884693	30211	0.453709	115184	38.3979	12293	0.147442
574	X	4	5	46	29.96	30.36	2322	2.80503	12021	0.551407	1723750	60.3438	114847	1.03134	22242	0.738222	28328	0.401457	108111	34.0092	10562	0.119542
574	X	4	5	48	29.98	30.38	2519	2.76409	9063	0.377618	2063070	65.6025	98163	0.80072	19291	0.581591	30728	0.395555	102788	29.371	10405	0.106971
574	X	4	5	50	30	30.4	3225	3.62703	11558	0.493584	1767480	57.6047	116729	0.975908	24095	0.744537	18028	0.237857	123621	36.2047	10599	0.111682
574	X	4	5	52	30.02	30.42	2011	2.23823	9223	0.389782	2104480	67.8766	95196	0.787627	17829	0.545203	23494	0.306759	95758	27.7536	9803	0.102223
574	X	4	5	54	30.04	30.44	2799	3.23476	11224	0.492542	1750940	58.64	122376	1.05134	23736	0.753676	24981	0.338685	117535	35.3718	10823	0.117188
574	X	4	5	56	30.06	30.46	3466	4.21417	14333	0.661725	1404310	49.4799	156580	1.41524	29044	0.970238	30528	0.435441	134785	42.6753	12993	0.14801
574	X	4	5	58	30.08	30.48	3532	4.51834	14631	0.710705	1253440	46.4672	160964	1.53072	30019	1.0551	31138	0.467301	135354	45.0901	13398	0.160582
574	X	4	5	60	30.1	30.5	3860	4.77874	14081	0.661937	1286040	46.1386	157736	1.45166	30269	1.02959	30115	0.437378	140658	45.3463	13434	0.155822
574	X	4	5	62	30.12	30.52	4004	5.75545	15899	0.867784	872815	36.3572	184359	1.96996	32635	1.28886	34025	0.573761	141553	52.9853	14978	0.201714
574	X	4	5	64	30.14	30.54	5142	7.34108	17475	0.947331	559873	23.1633	227580	2.4153	39787	1.56066	43415	0.727136	171064	63.5972	18541	0.248004
574	X	4	5	66	30.16	30.56	4803	7.18971	18450	1.0487	577195	25.0383	230965	2.57012	40013	1.64565	45053	0.79117	157579	61.4254	20746	0.290959
574	X	4	5	68	30.18	30.58	3073	3.81838	13072	0.616759	1417950	51.0577	158810	1.46691	29156	0.995367	11289	0.164558	128901	41.7085	14761	0.171843
574	X	4	5	70	30.2	30.6	4802	6.7936	13387	0.719147	689321	28.2607	206654	2.17335	37631	1.46272	27954	0.463948	162602	59.9039	16800	0.222682
574	X	4	5	72	30.22	30.62	5248	8.27379	18324	1.09695	261167	11.932	263723	3.09077	45200	1.95789	52233	0.966058	176243	72.3559	22117	0.326689
574	X	4	5	74	30.24	30.64	5434	8.38778	17119	1.00337	337729	15.107	249424	2.86203	42434	1.79962	28951	0.524251	174251	70.0413	18988	0.274603
574	X	4	5	76	30.26	30.66	4612	7.27756	16008	0.959158	406616	18.5936	238416	2.79666	40270	1.74589	34211	0.633301	164855	67.7407	17120	0.253104
574	X	4	5	78	30.28	30.68	4658	7.19142	16832	0.986751	402845	18.0234	243721	2.79716	41492	1.76002	32673	0.591769	170084	68.3802	18621	0.26935
574	X	4	5	80	30.3	30.7	4515	6.53984	17539	0.964652	651876	27.3626	222023	2.39065	39206	1.56027	60686	1.03121	158787	59.8929	19001	0.25786
574	X	4	5	82	30.32	30.72	4955	7.37865	16794	0.949608	533209	23.0099	234835	2.59959	41060	1.67993	45733	0.798934	163245	63.3031	20095	0.280362
574	X	4	5	84	30.34	30.74	4226	7.08837	15937	1.01503	557866	27.1162	220168	2.74524	36190	1.6678	44528	0.876189	135527	59.1962	18767	0.294924
574	X	4	5	86	30.36	30.76	4794	7.00513	16709	0.927097	622774	26.3713	223790	2.4309	39527	1.5869	43984	0.753981	159445	60.6709	18542	0.253847
574	X	4	5	88	30.38	30.78	4613	6.82827	18105	1.01761	676435	29.0159	222948	2.45324	38789	1.57752	45070	0.782641	150578	58.0417	20411	0.283067
574	X	4	5	90	30.4	30.8	5109	7.5003	15928	0.887893	670652	28.5314	219911	2.39993	38668	1.55967	41082	0.707526	152120	58.1541	18842	0.25916
574	X	4	5	92	30.42	30.82	4604	6.6914	15250	0.841605	774754	32.6308	199311	2.15338	36742	1.46718	32359	0.551727	146523	55.4548	15356	0.209102
574	X	4	5	94	30.44	30.84	4750	7.16862	15163	0.868927	639792	27.981	221773	2.48805	38667	1.60332	35570	0.629757	150083	58.9827	19635	0.277633
574	X	4	5	96	30.46	30.86	4741	7.10935	16245	0.924989	677772	29.4528	210101	2.34205	37881	1.5607	35629	0.626775	147835	57.7283	18155	0.255067
574	X	4	5	98	30.48	30.88	4268	6.27487	14616	0.815953	778877	33.1842	195180	2.13316	35264	1.42446	31268	0.539297	144740	55.4141	15532	0.213947
574	X	4	5	100	30.5	30.9	4050	6.49096	16162	0.983571	652704	30.3147	202469	2.41224	35398	1.55873	31802	0.597938	137521	57.395	16437	0.246817
574	X	4	5	102	30.52	30.92	3688	4.90621	13848	0.699518	1137000	43.8329	160243	1.58468	31209	1.1407	35419	0.552763	135971	47.1035	14424	0.179779
574	X	4	5	104	30.54	30.94	4088	6.1318	13360	0.760922	774752	33.6762	189537	2.11339	34419	1.41845	29541	0.519816	141269	55.1792	14253	0.2003
574	X	4	5	106	30.56	30.96	3612	5.35942	12440	0.700886	959642	41.2631	165480	1.82526	29768	1.21355	29008	0.504935	126659	48.9393	13921	0.193526
574	X	4	5	108	30.58	30.98	3613	5.03304	12252	0.648076	1144700	46.2101	152138	1.57546	28518	1.09149	25674	0.419569	123621	44.8441	13645	0.178088
574	X	4	5	110	30.6	31	3642	5.00282	12059	0.628989	1238290	49.2926	140749	1.43724	27509	1.03822	25089	0.404302	117581	42.0595	10594	0.136343
574	X	4	5	112	30.62	31.02	3716	5.08606	13159	0.683889	1153980	45.7706	152519	1.55181	29343	1.10344	27407	0.440063	126828	45.2035	12526	0.160626
574	X	4	5	114	30.64	31.04	4170	6.0002	13358	0.729841	882830	36.812	179828	1.92352	34221	1.35289	34715	0.585996	139867	52.4079	13918	0.187631
574	X	4	5	116	30.66	31.06	3286	5.76814	13101	0.873231	716690	36.4571	169172	2.20752	29677	1.43129	37931	0.781106	114330	52.2612	13400	0.220379
574	X	4	5	118	30.68	31.08	3955	6.5922	13783	0.872337	644371	31.1245	184982	2.29204	33800	1.54789	34317	0.671028	130571	56.6737	14489	0.226267
574	X	4	5	120	30.7	31.1	3925	6.57998	13299	0.846565	617905	30.0185	181882	2.26664	32727	1.5074	34115	0.670931	132625	57.8977	13511	0.212212
574	X	4	5	122	30.72	31.12	3886	7.62255	12633	0.940938	384653	21.865	193243	2.8178	32845	1.77013	44447	1.02279	124707	63.7001	14186	0.260709
574	X	4	5	124	30.74	31.14	3776	6.28975	10928	0.691192	770699	37.2022	151827	1.88	27852	1.27466	16530	0.323014	120264	52.1661	11089	0.173058
574	X	4	5	126	30.76	31.16	4163	6.66532	12743	0.774717	743319	34.4884	180934	2.15349	32900	1.44727	28710	0.539256	128890	53.7384	12876	0.193149
574	X	4	5	128	30.78	31.18	3828	5.65837	13289	0.74588	931701	39.9098	171670	1.88635	31974	1.29854	56229	0.975052	128198	49.346	12997	0.179995
574	X	4	5	132	30.82	31.22	2905	3.83661	12952	0.649523	1391880	53.2703	139709	1.37162	26396	0.957806	33082	0.512555	114193	39.2728	10411	0.128822
574	X	4	5	134	30.84	31.24	2913	3.88703	13117	0.664613	1433810	55.4438	133536	1.3246	23959	0.878384	33324	0.521654	106909	37.1487	10495	0.131207
574	X	4	5	136	30.86	31.26	3031	3.82113	11766	0.563238	1544720	56.4336	130992	1.22761	24673	0.854607	29883	0.441955	111323	36.5462	9454	0.111666
574	X	4	5	138	30.88	31.28	2808	3.93584	13281	0.706852	1206030	48.9869	147687	1.53883	27297	1.05122	58113	0.955568	116911	42.6724	11598	0.152308
574	X	4	5	140	30.9	31.3	3266	5.38646	15410	0.965042	733408	35.0522	177871	2.18072	30597	1.38645	135040	2.61275	121540	52.1985	14102	0.217904
574	X	4	6	4	31.04	31.44	5010	7.36302	16614	0.927148	542511	23.1052	234960	2.56697	39760	1.60547	29875	0.515079	166336	63.6584	18788	0.2587
574	X	4	6	6	31.06	31.46	5503	7.22539	16167	0.806024	764895	29.1036	216740	2.11548	38027	1.3718	36065	0.555515	171343	58.5841	19355	0.238097
574	X	4	6	8	31.08	31.48	4815	7.09896	15889	0.889511	589553	25.1886	220868	2.42069	37514	1.5196	31002	0.536211	161776	62.1103	17093	0.23611
574	X	4	6	10	31.1	31.5	4357	6.11025	15298	0.814635	884838	35.9599	188969	1.97002	33492	1.29048	41997	0.690936	145010	52.9567	15761	0.207087
574	X	4	6	12	31.12	31.52	4449	6.15516	14191	0.745498	907889	36.3993	187143	1.92468	33389	1.26917	19132	0.310517	147091	52.9925	15680	0.203246
574	X	4	6	14	31.14	31.54	4284	6.18179	12924	0.708139	848848	35.4959	184148	1.97533	31972	1.26757	14339	0.242735	143513	53.9272	14895	0.201374
574	X	4	6	16	31.16	31.56	4081	5.9583	13119	0.727299	905564	38.314	172655	1.87389	30136	1.20887	14322	0.245305	135407	51.4811	13977	0.191191
574	X	4	6	18	31.18	31.58	3621	5.25704	12401	0.683639	1049060	44.1365	146859	1.58497	26806	1.06926	16914	0.288076	123824	46.8133	12291	0.167185
574	X	4	6	20	31.2	31.6	3428	4.99791	13704	0.758668	1050490	44.3835	148650	1.6111	26746	1.07138	40314	0.689527	122014	46.3243	11978	0.163618
574	X	4	6	22	31.22	31.62	3379	4.93261	11420	0.633011	1096430	46.3821	138833	1.50657	25108	1.00702	13572	0.232423	118811	45.1644	10369	0.141815
574	X	4	6	24	31.24	31.64	3453	4.92212	11711	0.633879	1066240	44.0448	153152	1.62288	28287	1.10785	23860	0.399001	126946	47.1223	11023	0.147216
574	X	4	6	26	31.26	31.66	3569	4.92981	13118	0.68803	1148090	45.956	147791	1.51754	27704	1.05139	28801	0.466701	125768	45.2382	11775	0.152385
574	X	4	6	28	31.28	31.68	3289	4.56226	12533	0.660127	1199440	48.2143	140326	1.44698	26774	1.02039	40238	0.654787	119842	43.2889	11719	0.152302
574	X	4	6	30	31.3	31.7	2791	3.36812	8494	0.389222	1688020	59.0322	101068	0.906672	20670	0.685341	6684	0.0946264	112736	35.4276	8509	0.0962066
574	X	4	6	32	31.32	31.72	3747	4.83767	9163	0.449207	1287180	48.1589	150908	1.44835	27279	0.967652	5770	0.0873929	130602	43.909	11726	0.141841
574	X	4	6	34	31.34	31.74	4091	5.47058	14147	0.718332	1137100	44.0642	159099	1.58154	30042	1.10375	7118	0.111663	134364	46.7884	12887	0.161456
574	X	4	6	36	31.36	31.76	3512	4.59273	10470	0.5199	1231150	46.6562	152716	1.4846	28151	1.01146	6792	0.104199	133544	45.477	12563	0.153925
574	X	4	6	38	31.38	31.78	4503	5.80328	14924	0.73032	1121910	41.9	173887	1.66589	32168	1.13903	9396	0.142057	144403	48.4617	13063	0.157729
574	X	4	6	40	31.4	31.8	4333	5.6107	11549	0.567845	1111120	41.6941	172259	1.65813	32051	1.14027	9893	0.150281	145367	49.0169	13336	0.16179
574	X	4	6	42	31.42	31.82	3821	5.0317	13817	0.690888	1197410	45.6946	156219	1.52925	29510	1.06769	15613	0.241197	132935	45.5856	12892	0.159058
574	X	4	6	44	31.44	31.84	4188	5.45914	14497	0.71755	1191870	45.0225	151717	1.47015	28708	1.02816	28000	0.428177	134669	45.7127	13242	0.161722
574	X	4	6	46	31.46	31.86	3677	4.81554	13670	0.679793	1275330	48.4011	147802	1.43893	28230	1.01578	27125	0.416744	126268	43.0622	13844	0.169868
574	X	4	6	48	31.48	31.88	3341	4.54367	14038	0.724924	1223670	48.2256	145619	1.47217	26798	1.00132	41247	0.658068	121970	43.1951	14055	0.179085
574	X	4	6	50	31.5	31.9	2883	3.46094	10609	0.483594	1755240	61.0617	105417	0.940738	20252	0.667968	25017	0.352316	105331	32.9274	9367	0.105353
574	X	4	6	52	31.52	31.92	2646	3.15155	10378	0.469359	1856760	64.0877	96797	0.857048	18619	0.609297	37088	0.518222	97382	30.204	9215	0.102832
574	X	4	6	54	31.54	31.94	2766	3.39449	11031	0.514037	1663020	59.1428	108248	0.987532	20779	0.700625	29792	0.428914	108580	34.6995	11485	0.132054
574	X	4	6	56	31.56	31.96	2983	3.86856	13932	0.686067	1418050	53.293	130953	1.26247	23441	0.835239	34918	0.531243	116584	39.3719	12471	0.151529
574	X	4	6	58	31.58	31.98	2974	3.76235	14011	0.673044	1524060	55.8729	124504	1.17087	22854	0.794362	48322	0.717151	111867	36.8529	13199	0.156443
574	X	4	6	60	31.6	32	2761	3.39379	13810	0.644568	1572990	56.0309	124865	1.14095	22780	0.769326	23334	0.336477	117276	37.5386	12625	0.145394
574	X	4	6	62	31.62	32.02	2417	2.87005	10556	0.475958	1744280	60.0222	107887	0.952336	20724	0.676121	17023	0.237135	112081	34.6574	9783	0.108838
574	X	4	6	64	31.64	32.04	1668	1.83095	7832	0.326445	2258230	71.8344	74155	0.605104	14115	0.425697	35704	0.459775	85456	24.4273	8786	0.0903587
574	X	4	6	66	31.66	32.06	1874	2.07031	9295	0.389918	2219620	71.0607	81001	0.665221	15328	0.465255	52889	0.685456	85469	24.5882	7243	0.0749693
574	X	4	6	68	31.68	32.08	3031	3.98568	11623	0.580352	1429570	54.4761	125235	1.2242	22750	0.821932	36080	0.556584	111652	38.2326	9948	0.12256
574	X	4	6	70	31.7	32.1	2064	2.52097	10115	0.469116	1888790	66.8534	86910	0.789107	15085	0.506222	43321	0.620732	88476	28.1407	8720	0.0997866
574	X	4	6	72	31.72	32.12	3389	4.58431	16429	0.84386	1226070	48.0619	142579	1.43373	25390	0.943635	78451	1.24494	121233	42.7046	14441	0.18302
574	X	4	6	74	31.74	32.14	2589	3.59959	13757	0.726276	1387500	55.9034	118597	1.22575	20759	0.792987	38280	0.624368	102158	36.9866	10827	0.141035
574	X	4	6	76	31.76	32.16	3181	4.52239	15331	0.827622	1058760	43.6201	153264	1.61977	26459	1.03351	64594	1.07732	127305	47.1304	12677	0.168857
574	X	4	6	78	31.78	32.18	2571	3.15669	9218	0.429758	1665320	59.253	103419	0.943929	19416	0.65498	22769	0.327961	109882	35.1324	8800	0.10123
574	X	4	6	80	31.8	32.2	2030	2.51655	8371	0.394043	1744460	62.6692	95487	0.879958	17969	0.612028	17386	0.252846	100930	32.5822	8021	0.0931614
574	X	4	6	82	31.82	32.22	1404	1.63168	6381	0.281588	2122300	71.4756	66515	0.574641	12058	0.385019	23224	0.316631	83524	25.2773	5282	0.0575128
574	X	4	6	84	31.84	32.24	1552	2.02313	7018	0.347378	1848220	69.8183	67680	0.655845	11380	0.40758	26748	0.409045	77340	26.2535	6970	0.0851262
574	X	4	6	86	31.86	32.26	1829	2.33904	7044	0.342058	1855010	68.7469	71234	0.677205	12880	0.452562	37337	0.560159	80487	26.8041	6511	0.0780135
574	X	4	6	88	31.88	32.28	1683	2.15694	8435	0.410484	1818710	67.5463	73415	0.699436	14047	0.494625	19818	0.297963	84878	28.327	5595	0.067182
574	X	4	6	90	31.9	32.3	1764	2.30152	7342	0.363737	1748800	66.1212	76917	0.746015	14378	0.51541	30490	0.466683	86581	29.4165	5644	0.0689924
574	X	4	6	92	31.92	32.32	3187	4.48792	12674	0.677693	1192370	48.6584	124290	1.30109	22363	0.865229	43436	0.717564	117717	43.1672	9467	0.124903
574	X	4	6	94	31.94	32.34	2849	4.14722	12857	0.710658	1124470	47.4346	129140	1.39744	23894	0.955634	51830	0.885102	116904	44.3144	11359	0.154918
574	X	4	6	96	31.96	32.36	3108	4.58301	12941	0.724593	1073940	45.8915	131634	1.44293	23228	0.941065	30744	0.531836	119082	45.7264	11482	0.15863
574	X	4	6	98	31.98	32.38	3056	4.53367	11474	0.646351	1119650	48.1351	126157	1.39129	22321	0.909807	22825	0.397242	113493	43.8447	10199	0.14176
574	X	4	6	100	32	32.4	2337	3.38209	11475	0.630574	1360940	57.0755	104272	1.12177	18825	0.748514	21835	0.370704	97011	36.5594	8222	0.111481
574	X	4	6	102	32.02	32.42	2069	2.76523	8855	0.449382	1753700	67.9218	72985	0.725124	13478	0.494919	12429	0.194874	78652	27.3736	5999	0.0751185
574	X	4	6	104	32.04	32.44	1532	1.88974	7482	0.350443	2013560	71.9763	66754	0.612109	11867	0.402181	15146	0.219174	76188	24.4726	6702	0.0774543
574	X	4	6	106	32.06	32.46	1248	1.56321	8740	0.415692	1991800	72.2989	62085	0.578094	12213	0.420305	20802	0.305672	74611	24.3365	6957	0.0816439
574	X	4	6	110	32.1	32.5	1505	1.80844	10522	0.480089	2052040	71.4557	67366	0.60175	12197	0.402678	15908	0.224249	79751	24.9548	6424	0.072322
574	X	4	6	114	32.14	32.54	1068	1.30174	8490	0.392932	2025620	71.5473	51650	0.467985	8476	0.283846	13143	0.18793	81135	25.7521	5795	0.0661766
574	X	4	6	116	32.16	32.56	803	1.00172	8732	0.413619	2115020	76.4588	52121	0.483338	9113	0.312341	16648	0.243635	64685	21.0128	6305	0.0736908
574	X	4	6	118	32.18	32.58	818	1.04152	7813	0.377738	2134060	78.7418	46696	0.441981	7563	0.264575	21187	0.31647	56585	18.7615	4560	0.0543975
574	X	4	6	120	32.2	32.6	923	1.02643	5425	0.229078	2441040	78.6656	45569	0.376709	7077	0.21623	21972	0.286645	66153	19.1571	4052	0.0422178
574	X	4	6	122	32.22	32.62	581	0.698183	4693	0.214141	2307340	80.3501	43326	0.387035	6661	0.219923	48730	0.686969	55587	17.3947	4345	0.0489194
574	X	4	6	126	32.26	32.66	1260	1.62481	6913	0.338497	2005600	74.9475	53504	0.512892	8442	0.299099	35288	0.533833	64583	21.6871	4658	0.0562767
574	X	4	6	128	32.28	32.68	2086	2.45046	8735	0.389631	1989770	67.7362	78785	0.687996	14415	0.46525	50842	0.700655	89897	27.4999	6360	0.0699986
574	X	4	6	130	32.3	32.7	1577	1.89781	7708	0.352224	2018930	70.4083	70381	0.629629	12945	0.428017	32101	0.453197	82217	25.7652	5825	0.0656772
574	X	4	6	132	32.32	32.72	2561	3.58901	12194	0.648886	1364700	55.4222	106510	1.10959	19259	0.741545	64038	1.05281	102254	37.3162	9123	0.119785
574	X	4	6	134	32.34	32.74	3096	4.14271	13016	0.661329	1335120	51.7712	126383	1.25713	22589	0.83046	38235	0.600195	116560	40.6148	9746	0.122182
574	X	4	6	136	32.36	32.76	3568	5.10398	18387	0.998738	919397	38.1127	178311	1.89614	30524	1.19967	42069	0.705982	138986	51.7733	15627	0.209439
574	X	4	6	138	32.38	32.78	3407	5.0652	16433	0.927679	893674	38.5023	172512	1.90657	29410	1.20132	13372	0.233221	134251	51.9748	13562	0.188906
574	X	4	6	140	32.4	32.8	3480	4.27462	15447	0.720475	1367230	48.6679	146421	1.337	26963	0.909964	6400	0.0922243	137105	43.8553	12378	0.142451
574	X	4	6	142	32.42	32.82	4249	5.63112	13886	0.698783	1044230	40.1039	171986	1.69438	30106	1.09622	6040	0.0939059	146348	50.5064	14120	0.175324
574	X	4	7	2	32.52	32.92	2848	3.93068	11181	0.585955	1229490	49.1738	116242	1.19261	22056	0.836358	5986	0.0969196	122599	44.0621	9397	0.121511
574	X	4	7	4	32.54	32.94	4018	4.69465	14118	0.626359	1342400	45.4526	157257	1.36588	29414	0.944248	7672	0.10516	153362	46.6619	13630	0.149206
574	X	4	7	6	32.56	32.96	3037	3.54211	12197	0.540166	1695440	57.3038	112165	0.972486	22280	0.713955	12902	0.176532	120667	36.6486	9368	0.102368
574	X	4	7	8	32.58	32.98	3021	3.77508	14584	0.692004	1473890	53.3731	128525	1.19391	24282	0.833677	21457	0.314551	121964	39.6879	11091	0.129851
574	X	4	7	10	32.6	33	3602	4.50424	15663	0.74372	1397990	50.6599	140349	1.30466	25830	0.887444	35426	0.519694	126669	41.2477	11318	0.132601
574	X	4	7	12	32.62	33.02	3001	3.67448	14354	0.66736	1532370	54.3722	124717	1.13518	23978	0.806643	34115	0.490031	121490	38.7367	10239	0.117459
574	X	4	7	14	32.64	33.04	3270	4.46736	12998	0.674275	1189560	47.0947	134663	1.3676	26384	0.990336	33482	0.536615	125746	44.7352	10465	0.133949
574	X	4	7	16	32.66	33.06	3611	4.97022	16071	0.839939	1059330	42.2535	155208	1.58807	28835	1.09045	56709	0.915688	134404	48.1739	13046	0.168238
574	X	4	7	18	32.68	33.08	4204	5.5987	18188	0.919743	974425	37.6059	175357	1.73603	32668	1.19532	65528	1.02376	149182	51.736	14791	0.184553
574	X	4	7	20	32.7	33.1	3895	5.40226	16644	0.876562	989641	39.7767	162277	1.67315	30105	1.14722	34608	0.563109	139477	50.3758	14247	0.185136
574	X	4	7	22	32.72	33.12	4605	6.26711	17716	0.915503	792539	31.2565	192141	1.94386	35493	1.32715	58643	0.93627	161271	57.1538	15668	0.199779
574	X	4	7	24	32.74	33.14	3962	5.55691	16201	0.862814	834321	33.9105	179032	1.86663	32048	1.23497	31618	0.520236	152949	55.862	14145	0.185874
574	X	4	7	26	32.76	33.16	4482	5.94839	16162	0.814478	819516	31.5187	179778	1.77367	33334	1.2155	51736	0.805505	167050	57.7332	15328	0.190595
574	X	4	7	28	32.78	33.18	2847	3.47451	14069	0.651968	1531080	54.1486	114428	1.03812	23198	0.777848	59308	0.849116	122559	38.9496	9648	0.110317
574	X	4	7	30	32.8	33.2	3939	4.8494	11319	0.529136	1262270	45.0337	146249	1.33845	27824	0.941153	5289	0.0763877	146954	47.1124	10347	0.119348
574	X	4	7	32	32.82	33.22	2344	2.51306	8413	0.342494	1942860	60.3629	93330	0.743832	19792	0.583006	5932	0.0746095	126482	35.3122	6756	0.067863
574	X	4	7	34	32.84	33.24	3085	3.70535	10063	0.458942	1558540	54.2469	114141	1.01912	21249	0.701214	6300	0.0887691	126849	39.6746	9344	0.105149
574	X	4	7	36	32.86	33.26	2671	3.01931	12213	0.524218	1931450	63.2702	94101	0.790744	18553	0.576217	10140	0.134468	107320	31.5911	8849	0.0937185
574	X	4	7	38	32.88	33.28	2571	3.00276	13074	0.579807	1814120	61.4	94689	0.822103	18565	0.595732	16351	0.224032	109388	33.2689	9748	0.106667
574	X	4	7	40	32.9	33.3	2967	3.50309	15908	0.713191	1691380	57.8707	109027	0.956921	21921	0.711102	18734	0.259485	116670	35.871	10354	0.114535
574	X	4	7	42	32.92	33.32	3043	3.5555	13930	0.618026	1749220	59.2279	99513	0.864345	19759	0.634311	20977	0.287534	114102	34.7171	8704	0.0952831
574	X	4	7	44	32.94	33.34	3149	3.58338	15306	0.661361	1684460	55.5474	113805	0.962698	24263	0.758583	21861	0.291835	128549	38.0926	9587	0.102212
574	X	4	7	46	32.96	33.36	2073	2.88336	10956	0.578641	1487630	59.9622	77338	0.799654	17711	0.676833	10245	0.167171	96198	34.8432	6824	0.0889278
574	X	5	1	10	33.1	33.872	1199	1.36381	8016	0.346218	2276830	75.0497	53146	0.449381	10006	0.312705	16985	0.226647	74952	22.2009	4756	0.0506846
574	X	5	1	16	33.16	33.932	859	1.29751	6808	0.390475	1678270	73.462	58905	0.661421	11448	0.4751	12460	0.220792	59553	23.4246	4814	0.0681274
574	X	5	1	18	33.18	33.952	807	1.25203	6178	0.363952	1674390	75.28	51671	0.59593	9763	0.416161	12166	0.221429	53962	21.8011	4770	0.0693356
574	X	5	1	20	33.2	33.972	696	1.10246	5393	0.324371	1656200	76.0239	45393	0.534506	9103	0.396166	10936	0.203217	51765	21.3522	4257	0.0631766
574	X	5	1	32	33.32	34.092	2510	3.89443	16148	0.951361	1083980	48.7389	141081	1.62722	24378	1.03922	23296	0.424032	106791	43.1475	12200	0.177349
574	X	5	1	34	33.34	34.112	2782	4.37015	16730	0.997912	1051570	47.8698	141516	1.65255	24268	1.0474	21834	0.402365	106291	43.4798	12232	0.180026
574	X	5	1	36	33.36	34.132	2502	3.84557	14314	0.835393	1191650	53.0767	125188	1.43036	21845	0.922494	20363	0.367166	98374	39.3736	10329	0.148741
574	X	5	1	38	33.38	34.152	3366	7.4555	20417	1.71716	231435	14.8551	201774	3.32228	31722	1.93046	29978	0.778956	120634	69.5799	17381	0.360691
574	X	5	1	40	33.4	34.172	3310	7.74748	19356	1.7203	182662	12.3898	208117	3.62117	30876	1.9856	23305	0.639926	117355	71.5296	16697	0.366159
574	X	5	1	42	33.42	34.192	3588	8.02779	17337	1.4729	215744	13.9883	202007	3.35984	31649	1.94555	20506	0.538235	120745	70.35	15140	0.317371
574	X	5	1	44	33.44	34.212	4136	8.56325	17708	1.39215	211696	12.7015	205529	3.1633	33481	1.90456	17097	0.415266	132686	71.5377	16618	0.322356
574	X	5	1	46	33.46	34.232	3145	5.92294	18331	1.31087	497260	27.1384	176582	2.47213	29441	1.52338	16764	0.370376	124258	60.9386	18323	0.323304
574	X	5	1	48	33.48	34.252	2963	5.54957	12715	0.904276	620592	33.6835	147677	2.05613	23727	1.22098	16354	0.359335	114836	56.009	12381	0.217261
574	X	5	1	50	33.5	34.272	3403	6.66026	16724	1.24287	467616	26.5217	171266	2.49177	28779	1.54754	34522	0.792634	118702	60.4976	13394	0.245605
574	X	5	1	112	34.12	34.892	2733	4.96191	15497	1.06835	735583	38.7011	140100	1.89084	22771	1.13587	23887	0.508766	109040	51.5521	10645	0.181073
574	X	5	1	114	34.14	34.912	2159	4.38946	10956	0.845799	731672	43.108	103647	1.56648	17217	0.961732	8493	0.202566	92123	48.7728	8043	0.153206
574	X	5	1	116	34.16	34.932	2531	4.50687	16038	1.0844	793557	40.9491	134595	1.78164	20329	0.994575	9456	0.197532	108513	50.3172	10115	0.168751
574	X	5	1	118	34.18	34.952	2426	4.39232	14510	0.997533	774007	40.6098	116953	1.57407	20013	0.995529	6582	0.139801	108458	51.1347	9208	0.156195
574	X	5	1	122	34.22	34.992	2783	4.31639	14608	0.86031	998548	44.8806	133990	1.54486	22886	0.975249	9726	0.176966	116622	47.102	9883	0.143613
574	X	5	1	126	34.26	35.032	2409	3.20849	14542	0.735436	1439010	55.5407	116130	1.14979	20543	0.751737	28629	0.44732	109707	38.0496	9377	0.117011
574	X	5	1	128	34.28	35.052	2907	4.29421	16408	0.920344	1046300	44.7896	147128	1.61563	24088	0.977635	49740	0.861968	120558	46.3751	11959	0.165512
574	X	5	1	130	34.3	35.072	3392	5.33667	19752	1.18	798064	36.3861	168132	1.96641	28526	1.23309	51726	0.954709	128725	52.7386	13869	0.204436
574	X	5	1	134	34.34	35.112	3690	6.06665	18952	1.18314	645634	30.7604	186577	2.28029	30771	1.38996	61920	1.19427	132843	56.8739	16320	0.251386
574	X	5	1	136	34.36	35.132	2823	6.56919	16376	1.44699	312519	21.0746	159463	2.75848	23120	1.47818	61043	1.66642	106656	64.6305	17227	0.375585
574	X	5	1	138	34.38	35.152	3738	6.78419	18981	1.30808	437467	23.0084	193107	2.60535	30982	1.54492	55828	1.18866	133891	63.2793	16531	0.281097
574	X	5	1	140	34.4	35.172	3553	6.1989	21355	1.41474	478834	24.2096	199912	2.59279	31440	1.50709	85085	1.74149	136510	62.0205	19267	0.314943
574	X	5	1	142	34.42	35.192	3582	5.95771	18523	1.16983	578441	27.8802	187930	2.32358	30253	1.38248	38860	0.758235	139133	60.2608	17146	0.267186
574	X	5	1	144	34.44	35.212	3307	5.37022	15780	0.97302	750514	35.3183	183904	2.22003	26811	1.19622	10718	0.204183	128826	54.477	15843	0.241043
574	X	5	1	146	34.46	35.232	3107	5.99175	13309	0.974574	602628	33.6779	150889	2.16311	24229	1.28377	6781	0.15341	110595	55.5392	11970	0.216274
574	X	5	1	148	34.48	35.252	2153	3.45302	14028	0.854294	1061740	49.3463	111936	1.33455	17852	0.786648	7866	0.147998	105199	43.9358	9410	0.141398
574	X	5	2	2	34.52	35.292	3375	6.15378	12052	0.834418	493827	26.0931	155942	2.11368	26263	1.31568	6872	0.146994	132966	63.1335	12224	0.208824
574	X	5	2	4	34.54	35.312	3266	5.93479	16576	1.14374	527012	27.7519	169771	2.2933	27943	1.39508	29140	0.621193	128130	60.6305	13481	0.229514
574	X	5	2	6	34.56	35.332	3470	4.97534	16354	0.890378	1034620	42.9891	139283	1.48457	25742	1.01408	20006	0.336513	128971	48.1545	11578	0.155534
574	X	5	2	8	34.58	35.352	3904	6.82793	17510	1.16285	547605	27.7542	190426	2.47579	29122	1.39939	10773	0.221036	131551	59.9135	14968	0.245268
574	X	5	2	10	34.6	35.372	3638	6.23769	15536	1.01148	547090	27.1833	189930	2.42083	30818	1.45179	8931	0.179642	137248	61.28	14644	0.235244
574	X	5	2	12	34.62	35.392	4230	7.37748	15932	1.0551	438268	22.1509	202396	2.62409	32393	1.55224	22055	0.451256	142096	64.5359	15489	0.253098
574	X	5	2	14	34.64	35.412	3297	5.74204	15993	1.05763	691467	34.8981	154848	2.00476	26226	1.25493	38016	0.776715	119192	54.0563	12841	0.209529
574	X	5	2	16	34.66	35.432	3316	5.26601	17476	1.05382	792347	36.4641	160668	1.89673	27776	1.21192	35938	0.669528	128753	53.2447	12985	0.1932
574	X	5	2	18	34.68	35.452	3183	4.9036	14460	0.84587	898288	40.103	157519	1.80393	26068	1.10338	24091	0.435393	126178	50.619	12869	0.185747
574	X	5	2	20	34.7	35.472	3436	6.48296	16567	1.18692	474618	25.9506	186078	2.6099	28397	1.47208	30226	0.669035	124917	61.3753	14325	0.253229
574	X	5	2	22	34.72	35.492	3899	6.9568	19603	1.32812	394055	20.3749	206630	2.74068	32966	1.61607	51562	1.07928	141230	65.6198	17007	0.284304
574	X	5	2	24	34.74	35.512	3863	6.96473	18743	1.28314	350235	18.2988	215734	2.89139	32793	1.62442	53820	1.13834	143798	67.5124	16980	0.286824
574	X	5	2	26	34.76	35.532	4055	7.58019	21024	1.49232	309587	16.7708	230297	3.20027	35367	1.81646	42759	0.937701	139471	67.8929	17662	0.309334
574	X	5	2	28	34.78	35.552	3988	7.3026	20592	1.43178	364804	19.3582	224924	3.06173	34707	1.74614	44556	0.957142	138058	65.8317	18108	0.310664
574	X	5	2	30	34.8	35.572	4209	6.83555	18000	1.11	526774	24.7914	212953	2.57091	33339	1.4876	33493	0.638111	147302	62.2952	17827	0.271251
574	X	5	2	32	34.82	35.592	4585	8.02599	19189	1.27546	360694	18.297	234305	3.04894	36517	1.75628	41934	0.861139	145740	66.4338	18372	0.30131
574	X	5	2	34	34.84	35.612	3996	7.28907	16988	1.17665	399450	21.1151	211067	2.86204	32875	1.6476	46549	0.996105	136047	64.623	16997	0.290481
574	X	5	2	36	34.86	35.632	4193	7.34998	19608	1.30512	394601	20.0448	216841	2.8256	34428	1.6581	60601	1.2462	142995	65.273	18096	0.297195
574	X	5	2	40	34.9	35.672	4063	6.69677	18178	1.13768	514068	24.554	211414	2.59036	34397	1.55768	40543	0.783938	145417	62.4144	17173	0.265193
574	X	5	2	42	34.92	35.692	4291	7.21851	20101	1.284	437032	21.3052	224753	2.81063	36703	1.6964	38006	0.750048	147582	64.6508	18049	0.284472
574	X	5	2	44	34.94	35.712	4484	7.19203	17294	1.05327	479074	22.2675	227519	2.71276	37238	1.64101	38386	0.722281	153571	64.1425	17876	0.26863
574	X	5	2	46	34.96	35.732	4171	6.96715	18466	1.17124	553779	26.8062	202070	2.50914	31463	1.44395	74548	1.46083	136518	59.3822	16569	0.259304
574	X	5	2	48	34.98	35.752	3448	6.0858	17632	1.1817	545774	27.9156	194232	2.54847	30803	1.49376	63062	1.30577	128819	59.2082	15766	0.260718
574	X	5	2	50	35	35.772	3843	5.60233	16665	0.922486	844504	35.6765	196535	2.12984	33369	1.33653	103746	1.77426	137865	52.3363	16231	0.221688
574	X	5	2	52	35.02	35.792	4527	7.12063	18712	1.1176	566870	25.8389	227003	2.65429	35528	1.53539	52786	0.974035	147651	60.4778	19090	0.281328
574	X	5	2	54	35.04	35.812	3526	5.63623	15258	0.926106	789346	36.5643	180062	2.13962	28582	1.25527	21768	0.4082	126945	52.8413	15290	0.228988
574	X	5	2	56	35.06	35.832	3995	5.7876	16341	0.898912	887859	37.2742	184826	1.99046	31556	1.25604	24725	0.420209	138281	52.167	15146	0.205579
574	X	5	2	58	35.08	35.852	3677	6.37919	18576	1.22372	665511	33.4588	184586	2.38056	29488	1.40558	49911	1.01582	119158	53.8327	18683	0.30368
574	X	5	2	60	35.1	35.872	4363	6.48612	19333	1.09133	705088	30.3757	201869	2.23089	34308	1.40131	51062	0.890524	147890	57.2519	19545	0.272229
574	X	5	2	62	35.12	35.892	3351	5.04111	15443	0.882145	937030	40.8496	162793	1.82052	27583	1.14007	43342	0.764906	125782	49.2744	16122	0.227232
574	X	5	2	64	35.14	35.912	3127	5.01497	15705	0.956391	906801	42.144	156148	1.8616	25214	1.11102	64441	1.21241	113701	47.485	14282	0.214599
574	X	5	2	66	35.16	35.932	3253	4.32234	15476	0.780819	1266210	48.7553	153316	1.51437	25767	0.940669	54790	0.854051	123275	42.6541	14321	0.178282
574	X	5	2	68	35.18	35.952	3053	4.19723	14984	0.782206	1299110	51.7566	135796	1.38782	23103	0.872656	67516	1.08891	111045	39.7545	12425	0.160041
574	X	5	2	70	35.2	35.972	2860	3.90235	14226	0.737054	1249930	49.4229	136765	1.38721	23793	0.891965	101400	1.6231	117834	41.868	13100	0.167467
574	X	5	2	72	35.22	35.992	3936	6.31071	16612	1.01135	752439	34.9605	176226	2.1004	29049	1.27965	30816	0.579625	128192	53.5223	15675	0.235466
574	X	5	2	74	35.24	36.012	3252	5.46328	12881	0.821692	808263	39.3494	150200	1.87578	26096	1.20452	47717	0.940424	114640	50.1523	12237	0.192609
574	X	5	2	76	35.26	36.032	2686	3.89287	11075	0.609487	1250730	52.5305	120705	1.30046	20997	0.836102	27603	0.469319	106599	40.2317	9545	0.12961
574	X	5	2	78	35.28	36.052	3703	5.42604	14169	0.788361	993939	42.2058	164867	1.79586	27698	1.11511	56436	0.970137	124536	47.5199	13027	0.178843
574	X	5	2	80	35.3	36.072	4007	6.10954	13877	0.803418	843120	37.253	181863	2.06131	30020	1.25759	32021	0.572759	130288	51.7303	14842	0.212022
574	X	5	2	82	35.32	36.092	2571	3.85649	14038	0.799563	1265860	55.0247	118999	1.32691	19315	0.796019	46885	0.825035	95272	37.2141	11186	0.157204
574	X	5	2	84	35.34	36.112	2849	4.8127	13977	0.896534	898823	44.0001	147476	1.85194	24743	1.14838	49455	0.980063	104825	46.1118	12540	0.198469
574	X	5	2	86	35.36	36.132	3925	6.00434	18464	1.07253	774185	34.3205	179251	2.03843	30077	1.26415	99944	1.79362	133742	53.2776	15971	0.228905
574	X	5	2	88	35.38	36.152	2601	3.58653	12991	0.680195	1366450	54.6024	128631	1.31853	21640	0.819842	29017	0.469391	106883	38.3791	11152	0.144074
574	X	5	2	90	35.4	36.172	4128	5.49275	16548	0.836088	1055900	40.715	172334	1.70463	29996	1.09661	30124	0.47023	142825	49.4886	15731	0.196112
574	X	5	2	92	35.42	36.192	4548	6.71169	21132	1.18416	674486	28.8448	206780	2.26845	34985	1.41851	85714	1.48392	150464	57.8223	19247	0.266117
574	X	5	2	94	35.44	36.212	4295	7.51091	20495	1.36093	409642	20.7595	230569	2.99736	36689	1.7628	61542	1.26255	140542	64.0011	21050	0.344889
574	X	5	2	96	35.46	36.232	4464	7.10738	19959	1.20665	479405	22.1193	240834	2.85044	38445	1.68176	40831	0.762646	154302	63.9747	19922	0.297178
574	X	5	2	98	35.48	36.252	4663	7.29173	19701	1.1698	558464	25.3072	229008	2.6621	38310	1.64595	44286	0.812418	149345	60.8145	20224	0.296299
574	X	5	2	100	35.5	36.272	4690	7.47236	19326	1.16919	503508	23.2474	235951	2.79457	37909	1.65946	61805	1.1552	149884	62.1858	21170	0.316012
574	X	5	2	102	35.52	36.292	4419	7.4671	19500	1.25118	452334	22.1498	236290	2.96812	37348	1.73394	57516	1.14016	143123	62.978	19688	0.311694
574	X	5	2	104	35.54	36.312	3692	5.15451	17678	0.937164	1058780	42.8366	175275	1.81909	29949	1.14881	69992	1.14636	128640	46.7685	14444	0.188935
574	X	5	2	106	35.56	36.332	3416	5.42195	18550	1.11799	907522	41.7424	180578	2.13065	28445	1.24046	64397	1.19909	113537	46.9274	14794	0.219999
574	X	5	2	108	35.58	36.352	3680	5.3178	17496	0.960019	959991	40.2008	185952	1.99753	30080	1.19426	37470	0.635208	131495	49.4818	15705	0.212628
574	X	5	2	110	35.6	36.372	4117	6.65058	16657	1.02172	663276	31.0496	207488	2.49161	32265	1.43202	16612	0.31481	135034	56.8032	15622	0.236436
574	X	5	2	112	35.62	36.392	3500	5.01245	13456	0.731737	1153600	47.8764	149671	1.59341	25368	0.998175	12007	0.201727	116480	43.4395	10924	0.146576
574	X	5	2	114	35.64	36.412	3573	5.81271	16707	1.03205	798622	37.6504	172197	2.08247	30124	1.34647	38416	0.733171	120713	51.1388	13379	0.203923
574	X	5	2	116	35.66	36.432	3202	5.14829	17097	1.0438	890264	41.4805	154133	1.84224	25675	1.1342	53153	1.00258	114866	48.0933	16932	0.255064
574	X	5	2	118	35.68	36.452	3418	5.52548	15396	0.945067	899027	42.1166	150145	1.80434	25477	1.13158	39528	0.749636	112937	47.5429	12175	0.184402
574	X	5	2	120	35.7	36.472	3188	5.0878	14645	0.887478	945442	43.725	139522	1.65525	25058	1.09874	42546	0.796559	112063	46.572	11848	0.177156
574	X	5	2	122	35.72	36.492	3591	6.16311	17100	1.11439	713322	35.4775	165780	2.11507	28183	1.32895	125619	2.52922	114195	51.0367	14618	0.235055
574	X	5	2	124	35.74	36.512	3173	5.40183	16787	1.08518	706701	34.865	177874	2.25109	29762	1.3921	121088	2.41835	118080	52.3478	14961	0.238633
574	X	5	2	126	35.76	36.532	3471	4.9105	14456	0.776562	1089140	44.6518	154844	1.62845	27172	1.05616	37516	0.622638	125378	46.1896	12393	0.164265
574	X	5	2	128	35.78	36.552	4364	6.9087	19274	1.15862	507341	23.2752	203216	2.39154	35657	1.55094	244853	4.54742	145301	59.9006	17995	0.266908
574	X	5	2	130	35.8	36.572	3479	5.69311	16165	1.00445	849793	40.2987	156236	1.90057	25895	1.16426	51266	0.984175	114405	48.7519	13230	0.20284
574	X	5	2	132	35.82	36.592	3602	5.88981	17082	1.0606	784513	37.1741	169226	2.057	28713	1.28996	79529	1.52557	119276	50.7881	14022	0.214816
574	X	5	2	134	35.84	36.612	4432	7.6309	18064	1.18099	475299	23.7152	210121	2.68939	35093	1.6601	54623	1.10332	137695	61.737	17549	0.283091
574	X	5	2	136	35.86	36.632	3083	5.07061	16131	1.00741	888495	42.3472	159010	1.9441	26218	1.18474	29722	0.573472	111288	47.6635	13562	0.208982
574	X	5	2	138	35.88	36.652	4627	6.8674	16193	0.912592	655906	28.2109	218735	2.41335	37201	1.517	9926	0.172828	154330	59.6478	18561	0.258103
574	X	5	3	2	36.02	36.792	3504	5.84994	11866	0.752227	821901	39.764	140184	1.73978	25157	1.15394	11050	0.21642	115799	50.3435	11516	0.180131
574	X	5	3	4	36.04	36.812	4425	6.22284	17022	0.908956	877991	35.7807	194100	2.02913	33546	1.29615	14352	0.236775	145592	53.3169	15832	0.208598
574	X	5	3	6	36.06	36.832	3777	4.8911	16366	0.804747	1181860	44.3516	170802	1.64423	30070	1.06987	18106	0.275062	138764	46.7938	13976	0.169567
574	X	5	3	8	36.08	36.852	4028	5.74417	14726	0.797406	976949	40.3732	177451	1.88116	30107	1.17963	19910	0.333087	133354	49.5217	12699	0.16967
574	X	5	3	10	36.1	36.872	4187	6.21523	17077	0.962548	736462	31.6802	212176	2.34131	35348	1.44164	48366	0.842252	145639	56.2967	15828	0.22013
574	X	5	3	12	36.12	36.892	3964	5.42622	15150	0.787468	1070030	42.4466	161955	1.64804	28941	1.08847	18501	0.297103	135071	48.1479	12336	0.158211
574	X	5	3	14	36.14	36.912	4569	7.34063	19295	1.1771	477468	22.23	240236	2.86919	38722	1.70926	57705	1.08761	151313	63.3053	18661	0.280896
574	X	5	3	16	36.16	36.932	4516	7.30489	19066	1.17105	501341	23.5004	224848	2.70369	36642	1.62846	60867	1.15502	147831	62.2697	17604	0.26679
574	X	5	3	18	36.18	36.952	4915	7.53833	19963	1.16261	498328	22.1488	240908	2.7467	39769	1.67585	58267	1.04839	158706	63.3865	20379	0.292842
574	X	5	3	20	36.2	36.972	4310	6.31248	18276	1.01639	752555	31.9406	201127	2.18979	34044	1.36994	28636	0.49202	148028	56.457	16161	0.221763
574	X	5	3	22	36.22	36.992	4942	7.36422	21052	1.19117	604418	26.1002	225779	2.50101	38392	1.57182	129065	2.25621	151410	58.753	18795	0.2624
574	X	5	3	24	36.24	37.012	4592	6.76285	20049	1.12119	695035	29.6632	220392	2.41286	36784	1.48842	135395	2.33926	145941	55.9702	17545	0.242091
574	X	5	3	26	36.26	37.032	4501	6.37357	19074	1.02559	788281	32.3473	218546	2.30052	36995	1.43931	63013	1.04677	149763	55.2243	18293	0.242693
574	X	5	3	28	36.28	37.052	4721	6.90678	20613	1.14509	699434	29.6532	232668	2.53039	38858	1.56193	49613	0.851501	149866	57.0948	18701	0.256333
574	X	5	3	30	36.3	37.072	4873	6.99881	19564	1.06695	714688	29.7459	238366	2.54496	38717	1.52781	9764	0.164514	154232	57.6838	19860	0.267242
574	X	5	3	32	36.32	37.092	4448	6.70675	17094	0.978696	648508	28.3365	237552	2.66266	37552	1.55568	7373	0.130419	151208	59.3709	18292	0.258409
574	X	5	3	34	36.34	37.112	4817	7.54983	16877	1.00441	582139	26.4405	242725	2.82803	38151	1.64288	7016	0.129002	147317	60.1263	18999	0.27899
574	X	5	3	36	36.36	37.132	4565	7.41427	17380	1.07185	611376	28.7752	230322	2.78081	35430	1.58102	7465	0.142235	137077	57.9754	17031	0.259159
574	X	5	3	38	36.38	37.152	4952	7.33105	17242	0.969237	652749	28.0037	234172	2.57709	38752	1.57622	7391	0.128362	153460	59.1606	18300	0.253825
574	X	5	3	40	36.4	37.172	4855	7.26636	19109	1.08598	692958	30.055	221366	2.4629	36309	1.49307	10493	0.184236	146764	57.2003	17977	0.252083
574	X	5	3	42	36.42	37.192	3886	6.15467	18627	1.12021	754314	34.6208	195666	2.3037	32501	1.41428	41820	0.777022	129387	53.3634	16572	0.245909
574	X	5	3	44	36.44	37.212	3757	5.8829	16778	0.997579	792490	35.9606	187423	2.18163	31620	1.36035	23639	0.434238	129903	52.9689	14571	0.213766
574	X	5	3	46	36.46	37.232	3624	6.0989	15677	1.0018	788248	38.4423	179161	2.24138	28010	1.29513	7988	0.157706	115382	50.5653	12523	0.197456
574	X	5	3	48	36.48	37.252	3969	6.32225	16584	1.00308	705201	32.5526	200697	2.37651	33690	1.47445	8383	0.156653	134743	55.8918	14918	0.222638
574	X	5	3	50	36.5	37.272	3801	5.71786	16621	0.9494	885738	38.6121	187391	2.09553	30624	1.26571	8299	0.146457	130154	50.9852	16154	0.227674
574	X	5	3	52	36.52	37.292	4303	5.94277	15479	0.81174	983365	39.3564	182298	1.87158	32450	1.23132	9093	0.147324	140264	50.4446	15016	0.194299
574	X	5	3	54	36.54	37.312	4418	6.61671	18345	1.04326	678348	29.441	214574	2.38892	36213	1.49011	8803	0.154666	150290	58.6136	17944	0.251787
574	X	5	3	56	36.56	37.332	4978	7.5923	18162	1.05181	567697	25.091	222864	2.52678	37599	1.57555	7391	0.132242	155501	61.7594	18957	0.270886
574	X	5	3	58	36.58	37.352	4386	7.26732	14632	0.92059	624485	29.9855	201233	2.47864	33904	1.54346	6191	0.120341	133121	57.4386	15822	0.245621
574	X	5	3	60	36.6	37.372	4920	7.76254	18643	1.11689	504178	23.0518	230510	2.70357	38744	1.67951	13145	0.243303	153707	63.1515	19675	0.290838
574	X	5	3	62	36.62	37.392	4608	7.1364	20096	1.18177	573490	25.738	227140	2.61498	37204	1.58305	36248	0.658564	150706	60.7783	21292	0.308945
574	X	5	3	64	36.64	37.412	4117	7.27859	20017	1.34376	496246	25.4241	223803	2.94131	34458	1.67377	11915	0.24712	132000	60.7703	19381	0.321026
574	X	5	3	66	36.66	37.432	4880	6.95435	19335	1.04626	717855	29.6453	220657	2.33756	37753	1.47818	10351	0.173048	156603	58.115	18743	0.25025
574	X	5	3	68	36.68	37.452	4904	7.08433	18885	1.03591	690883	28.9225	218138	2.34255	37272	1.47934	9647	0.163489	156059	58.7068	19587	0.265103
574	X	5	3	70	36.7	37.472	4621	6.41347	17658	0.930584	745883	29.9993	219941	2.2692	37505	1.43016	9799	0.159546	162006	58.5517	18918	0.245998
574	X	5	3	72	36.72	37.492	4540	6.62782	15895	0.881114	701626	29.6827	225643	2.44875	37919	1.52093	8986	0.153897	153699	58.4302	18617	0.254638
574	X	5	3	74	36.74	37.512	4960	6.90227	15801	0.834933	822775	33.1798	212063	2.19373	35331	1.35084	8798	0.143629	152255	55.1739	16942	0.220889
574	X	5	3	76	36.76	37.532	3708	6.05663	17837	1.10629	740026	35.0285	189047	2.29546	30293	1.35948	11176	0.214154	126208	53.6821	16822	0.257435
574	X	5	3	78	36.78	37.552	3591	5.28882	18475	1.0332	949416	40.5213	175887	1.92569	29424	1.19065	23300	0.402576	128887	49.4315	14946	0.206237
574	X	5	3	80	36.8	37.572	3404	5.02792	17998	1.00944	990682	42.4049	166089	1.82368	28279	1.14763	27308	0.473191	124562	47.9111	14605	0.202115
574	X	5	3	82	36.82	37.592	3748	5.1254	17602	0.914001	1040980	41.2528	176625	1.79551	31331	1.17717	35850	0.575129	137461	48.9507	16332	0.20925
574	X	5	3	84	36.84	37.612	4708	6.91465	16302	0.909141	700135	29.7988	217986	2.37997	35693	1.44031	13082	0.225401	151903	58.0967	17082	0.235056
574	X	5	3	86	36.86	37.632	4388	6.789	15465	0.908544	662292	29.6942	200804	2.30951	33808	1.43713	19308	0.350449	144626	58.2689	16709	0.242208
574	X	5	3	88	36.88	37.652	3826	7.58319	16731	1.25917	404879	23.2549	203644	3.00045	30077	1.63787	22099	0.513839	121008	62.4557	15877	0.294831
574	X	5	3	90	36.9	37.672	3614	6.26916	16045	1.05686	677336	34.0493	171680	2.21386	27784	1.3242	30367	0.617974	120065	54.2361	14308	0.23254
574	X	5	3	92	36.92	37.692	4466	7.3261	17979	1.11989	480751	22.8537	211242	2.57598	35937	1.6197	44622	0.858719	148305	63.3522	19109	0.293691
574	X	5	3	94	36.94	37.712	3851	6.04574	16320	0.972866	772566	35.1475	179304	2.09254	30836	1.33006	14877	0.273993	131921	53.9314	14000	0.205922
574	X	5	3	96	36.96	37.732	3846	6.15414	16137	0.980478	729748	33.8387	184364	2.19302	30936	1.36007	10516	0.197404	132120	55.0526	14910	0.223529
574	X	5	3	98	36.98	37.752	4750	8.02111	17087	1.09563	380518	18.6208	228394	2.86704	36803	1.70751	9424	0.186691	152818	67.1996	19064	0.301615
574	X	5	3	100	37	37.772	4458	8.15983	16172	1.12399	310493	16.4693	231766	3.15355	36631	1.84216	7857	0.168712	144254	68.7575	18948	0.324939
574	X	5	3	102	37.02	37.792	3689	6.50742	15872	1.06314	584387	29.8733	191733	2.51423	30811	1.49329	10933	0.226249	126443	58.0826	14505	0.239726
574	X	5	3	104	37.04	37.812	2846	3.68213	12596	0.618805	1529940	57.3616	117135	1.12657	20934	0.744141	22633	0.343522	106855	36.0007	10112	0.122574
574	X	5	3	106	37.06	37.832	3208	4.49456	14006	0.745115	1243640	50.4927	138780	1.4454	24195	0.931358	29608	0.486642	113017	41.2333	13022	0.170934
574	X	5	3	110	37.1	37.872	2790	3.42581	12662	0.590362	1594290	56.7295	129438	1.18149	22657	0.764364	41633	0.599715	114369	36.5695	12101	0.139213
574	X	5	3	112	37.12	37.892	2818	3.29299	12354	0.548168	1784650	60.4346	116135	1.00884	21230	0.681612	57939	0.79427	108840	33.1199	10929	0.119654
574	X	5	3	114	37.14	37.912	2952	3.83658	15133	0.746808	1426000	53.7068	140754	1.35987	23489	0.838746	44237	0.674467	114309	38.6865	12341	0.150271
574	X	5	3	116	37.16	37.932	3729	5.38099	18816	1.03099	943403	39.4503	181930	1.95156	30433	1.20657	107243	1.81546	130286	48.9575	15290	0.206717
574	X	5	3	120	37.2	37.972	2842	3.69751	13447	0.664306	1396720	52.6597	150447	1.45505	24894	0.889854	114262	1.74396	114289	38.7206	13865	0.169007
574	X	5	3	122	37.22	37.992	2620	3.63154	15284	0.80442	1332170	53.5095	133860	1.37927	23313	0.887822	45515	0.740102	107784	38.9041	11035	0.143304
574	X	5	3	124	37.24	38.012	3131	4.37515	15650	0.830387	1124450	45.5338	165188	1.71592	27477	1.05491	30498	0.499953	125931	45.8241	12664	0.165798
574	X	5	3	126	37.26	38.032	3182	4.9005	14309	0.83677	973065	43.4275	156120	1.78734	24949	1.05568	13677	0.247103	118595	47.5617	12709	0.183379
574	X	5	3	128	37.28	38.052	3322	4.87815	16210	0.903848	969995	41.277	177898	1.94194	29210	1.17849	16962	0.2922	128958	49.3123	15703	0.216041
574	X	5	3	130	37.3	38.072	3495	5.45189	16493	0.976914	773162	34.9505	189675	2.19947	31030	1.3299	14568	0.266592	134416	54.6012	15292	0.223492
574	X	5	3	134	37.34	38.112	4354	7.82587	21326	1.45549	348587	18.1568	244583	3.26798	37575	1.85559	38404	0.809783	141647	66.2984	19604	0.330132
574	X	5	3	136	37.36	38.132	3822	6.47368	19194	1.23448	536224	26.3202	220934	2.78184	34421	1.60185	38543	0.765868	137233	60.53	18406	0.292091
574	X	5	3	138	37.38	38.152	4078	7.17282	20104	1.34271	405356	20.6615	229876	3.0057	36369	1.75757	69812	1.44052	140398	64.3065	18969	0.312597
574	X	5	3	140	37.4	38.172	4423	8.23474	20811	1.47124	186421	10.058	255686	3.53874	39555	2.02336	63228	1.38099	150351	72.8938	22883	0.399157
574	X	5	3	142	37.42	38.192	4429	7.75488	20843	1.38575	328810	16.6839	241122	3.13845	38206	1.83797	58618	1.20406	148360	67.6453	21316	0.349682
574	X	5	3	144	37.44	38.212	3510	7.18312	18342	1.42531	295517	17.5255	208613	3.17363	32231	1.81225	71645	1.72005	125408	66.8317	17125	0.328348
574	X	5	4	4	37.54	38.312	5658	8.19607	22572	1.24157	357793	15.0196	251024	2.70313	42461	1.68994	57580	0.978503	185302	69.8995	20019	0.271696
574	X	5	4	6	37.56	38.332	5469	7.74755	21452	1.15393	480734	19.7353	238578	2.51244	40623	1.58113	141123	2.34532	175283	64.6618	19780	0.262531
574	X	5	4	8	37.58	38.352	4180	5.92154	19020	1.02312	764666	31.3916	208300	2.1936	35449	1.37975	140098	2.3283	150552	55.5388	16824	0.223299
574	X	5	4	10	37.6	38.372	4963	7.65145	19483	1.14054	471083	21.0465	225415	2.5834	37351	1.58212	73713	1.33319	160409	64.3991	18259	0.263739
574	X	5	4	12	37.62	38.392	4778	6.95106	18649	1.03019	605531	25.5285	219889	2.37803	36206	1.44719	9256	0.157971	164390	62.2776	16837	0.229492
574	X	5	4	14	37.64	38.412	4819	7.17325	15521	0.877275	606501	26.1622	215801	2.38793	35758	1.46242	7237	0.126376	158871	61.5822	16377	0.228398
574	X	5	4	16	37.66	38.432	4043	6.12294	15969	0.918313	755067	33.1379	191882	2.16023	32309	1.34437	8192	0.145544	141900	55.9616	14736	0.20909
574	X	5	4	18	37.68	38.452	3831	5.51111	13187	0.720327	963082	40.1489	169595	1.81363	28213	1.1151	7557	0.127534	134551	50.4041	11824	0.159364
574	X	5	4	20	37.7	38.472	3783	6.16982	15625	0.967638	632853	29.9104	202274	2.45236	31405	1.40726	7511	0.143708	138300	58.7368	13878	0.212061
574	X	5	4	22	37.72	38.492	3353	4.58797	14128	0.734048	1148160	45.5274	155519	1.5819	26502	0.996332	8988	0.144277	129878	46.2779	11711	0.150134
574	X	5	4	24	37.74	38.512	4370	6.2225	14721	0.795935	858682	35.4323	194815	2.06212	32640	1.27695	9349	0.15617	145284	53.8707	13740	0.183303
574	X	5	4	26	37.76	38.532	4247	6.34815	14600	0.828657	797262	34.5342	198276	2.20315	32142	1.32001	7981	0.139949	139851	54.4355	13597	0.190417
574	X	5	4	28	37.78	38.552	4270	6.02764	15549	0.833449	825029	33.7498	189198	1.98539	30746	1.19247	8473	0.140315	151987	55.8698	15201	0.201043
574	X	5	4	30	37.8	38.572	3832	5.33808	14969	0.791788	1059870	42.7853	171135	1.77218	28431	1.08815	8771	0.143336	132106	47.9218	12207	0.159319
574	X	5	4	32	37.82	38.592	4265	6.06425	16396	0.885224	802835	33.0802	193817	2.04861	32314	1.26237	9197	0.15341	152086	56.3117	14580	0.194229
574	X	5	4	34	37.84	38.612	4173	6.93296	16336	1.03056	548881	26.426	207784	2.5662	31574	1.44125	7755	0.151147	141490	61.2135	15313	0.238357
574	X	5	4	36	37.86	38.632	5440	8.65825	19088	1.15358	229257	10.5739	275987	3.26534	41760	1.82612	9669	0.180535	178641	74.0395	20300	0.302709
574	X	5	4	38	37.88	38.652	5455	7.83214	17883	0.974951	447163	18.6052	254781	2.71933	40694	1.60529	9217	0.155247	181493	67.8574	18621	0.250488
574	X	5	4	40	37.9	38.672	5066	8.01442	18099	1.08722	306836	14.0668	255652	3.00652	39594	1.72098	8954	0.166177	173951	71.6614	18652	0.276459
574	X	5	4	42	37.92	38.692	5352	7.56182	17761	0.952871	461243	18.8853	249982	2.62559	40380	1.56753	9410	0.155972	184798	67.9922	19551	0.258808
574	X	5	4	44	37.94	38.712	3766	5.17441	14103	0.735781	1044710	41.5968	163409	1.66903	27744	1.04734	8839	0.142473	138263	49.4695	12787	0.164607
574	X	5	4	46	37.96	38.732	4108	7.76757	19086	1.37033	291839	15.9912	225502	3.16967	32732	1.70046	8460	0.187661	141198	69.524	16320	0.289117
574	X	5	4	48	37.98	38.752	3904	7.75217	19123	1.44187	327549	18.8483	205143	3.02816	30701	1.67496	8020	0.186825	129109	66.7608	16495	0.306877
574	X	5	4	50	38	38.772	4806	7.7601	17560	1.07663	339126	15.8682	241836	2.90277	37651	1.67031	9805	0.185729	167106	70.263	18064	0.273272
574	X	5	4	52	38.02	38.792	5797	9.00941	19682	1.1615	191106	8.60697	280564	3.24141	43634	1.86319	11014	0.20081	186835	75.6141	20782	0.302607
574	X	5	4	54	38.04	38.812	5401	8.06244	18240	1.03389	323078	13.976	256347	2.84465	40691	1.66889	9799	0.171602	185143	71.9699	19495	0.272655
574	X	5	4	56	38.06	38.832	5324	8.20294	17329	1.01382	287566	12.8396	263652	3.01975	40972	1.73443	9477	0.171297	181290	72.7372	19460	0.280913
574	X	5	4	58	38.08	38.852	5515	8.86634	18198	1.11091	191131	8.90457	278652	3.33019	42690	1.88566	11176	0.210782	180044	75.3752	21000	0.316312
574	X	5	4	60	38.1	38.872	4707	7.66913	18320	1.1334	343335	16.2107	248468	3.00941	38095	1.70533	10437	0.199492	164497	69.7929	18318	0.279626
574	X	5	4	62	38.12	38.892	4369	7.88901	17760	1.2177	275817	14.4326	240409	3.22701	36210	1.79642	9691	0.205285	150838	70.9256	18113	0.306428
574	X	5	4	64	38.14	38.912	5106	8.06359	20324	1.21875	331399	15.1664	255030	2.99397	38918	1.68864	12656	0.234472	171080	70.3555	18836	0.278698
574	X	5	4	66	38.16	38.932	5057	7.53701	18525	1.04839	401421	17.3376	245797	2.72328	38091	1.55979	11369	0.198782	178655	69.3382	18397	0.256893
574	X	5	4	68	38.18	38.952	5222	8.28627	19960	1.20265	356910	16.4121	241273	2.84603	38083	1.66032	16903	0.314655	166970	68.9941	19091	0.283824
574	X	5	4	70	38.2	38.972	5230	8.26321	17760	1.06548	344771	15.7856	235564	2.76672	38152	1.65616	19868	0.368255	169719	69.8279	18018	0.266718
574	X	5	4	72	38.22	38.992	4874	8.10338	16283	1.02795	274722	13.236	238572	2.94855	37845	1.72873	10617	0.207076	167353	72.4545	18859	0.293763
574	X	5	4	74	38.24	39.012	5263	8.70139	17576	1.1034	196882	9.43288	262285	3.22357	40514	1.84034	7727	0.14987	174764	75.2417	19806	0.306797
574	X	5	4	76	38.26	39.032	5126	7.90125	17207	1.00712	334250	14.9304	247126	2.83168	39661	1.67965	7229	0.13072	177503	71.2483	18759	0.27091
574	X	5	4	78	38.28	39.052	5806	9.07969	18468	1.09666	183396	8.31125	285014	3.31336	43088	1.85135	8022	0.147172	186344	75.8858	21479	0.314707
574	X	5	4	80	38.3	39.072	5719	8.99142	18706	1.11672	218613	9.96018	283487	3.31322	43569	1.88202	7590	0.13999	181442	74.2844	21184	0.312043
574	X	5	4	82	38.32	39.092	5842	9.07905	18015	1.06309	203596	9.16919	284762	3.2898	45577	1.94609	8476	0.154532	185318	74.9977	20641	0.300544
574	X	5	4	84	38.34	39.112	5266	8.1981	17442	1.03106	286812	12.9393	267529	3.09608	42252	1.80725	8831	0.161283	178781	72.4778	19820	0.289091
574	X	5	4	86	38.36	39.132	5232	7.89904	16834	0.965052	418762	18.3213	252406	2.83279	40671	1.68706	8901	0.15765	172624	67.8671	19087	0.269987
574	X	5	4	88	38.38	39.152	5142	8.24882	17585	1.07117	331659	15.4182	244610	2.91704	39449	1.73874	8779	0.165216	167921	70.1482	19469	0.292618
574	X	5	4	90	38.4	39.172	4880	7.41394	17824	1.02823	581684	25.6094	204645	2.31121	34029	1.42042	18159	0.323645	155870	61.6657	15982	0.227488
574	X	5	4	92	38.42	39.192	4568	7.07716	17842	1.04962	525141	23.5772	208297	2.39897	34705	1.47728	26743	0.486061	157877	63.6947	16466	0.239012
574	X	5	4	94	38.44	39.212	3756	6.13225	16281	1.00933	631678	29.8863	196321	2.3827	31103	1.39519	29365	0.562434	137370	58.4033	14936	0.228469
574	X	5	4	96	38.46	39.232	4415	6.82069	14209	0.833523	649874	29.0944	200024	2.29714	33243	1.41103	13198	0.239196	146894	59.0953	14419	0.208704
574	X	5	4	98	38.48	39.252	4252	6.87237	14830	0.910146	632208	29.6112	190354	2.28709	30366	1.34846	8911	0.168961	139195	58.5852	14299	0.216529
574	X	5	4	100	38.5	39.272	3921	6.26978	14831	0.900498	565011	26.1815	208751	2.48138	34185	1.50186	10897	0.204414	149447	62.2292	15443	0.231358
574	X	5	4	102	38.52	39.292	3699	5.982	14465	0.888254	699084	32.7623	176522	2.12212	29945	1.33053	10873	0.206281	134178	56.506	13364	0.202487
574	X	5	4	104	38.54	39.312	4370	6.76869	15201	0.894031	623212	27.9732	191895	2.20951	31656	1.34716	11797	0.21436	149706	60.3829	14480	0.210131
574	X	5	4	106	38.56	39.332	4017	6.0376	15736	0.898078	714148	31.1053	189916	2.12194	31897	1.3172	10102	0.178122	148534	58.1353	14663	0.206483
574	X	5	4	108	38.58	39.352	4065	6.41524	15299	0.916795	646616	29.5721	183759	2.15581	30256	1.31191	7528	0.139373	144247	59.2803	14098	0.208453
574	X	5	4	110	38.6	39.372	3888	5.87339	14569	0.835697	759277	33.2388	181175	2.03455	29988	1.24465	8315	0.147358	143458	56.4337	13555	0.191849
574	X	5	4	112	38.62	39.392	3893	5.7383	14073	0.787667	812832	34.7203	179587	1.96781	30032	1.21625	7832	0.135431	143901	55.235	14430	0.19928
574	X	5	4	114	38.64	39.412	4065	6.10343	13583	0.774401	744950	32.4133	179595	2.00455	30334	1.25136	7059	0.124338	146145	57.1411	13328	0.187489
574	X	5	4	116	38.66	39.432	3936	6.01147	15234	0.88348	764376	33.8311	176457	2.00343	30083	1.26237	6447	0.115513	140023	55.6899	14168	0.202737
574	X	5	4	118	38.68	39.452	3656	5.2055	13615	0.736089	886264	36.5681	175821	1.86095	30454	1.19135	8825	0.147407	145969	54.1213	12692	0.169311
574	X	5	4	120	38.7	39.472	3152	4.79873	13248	0.765857	958405	42.2837	149687	1.69408	25622	1.07175	8540	0.152527	123767	49.0678	11608	0.165576
574	X	5	4	122	38.72	39.492	2734	4.00666	14132	0.786401	1085410	46.0957	133860	1.45829	23233	0.935464	10016	0.172197	121597	46.4043	10272	0.141038
574	X	5	4	124	38.74	39.512	3568	4.58563	14414	0.703421	1168140	43.5061	150920	1.44188	27172	0.959476	12022	0.181259	144871	48.485	11395	0.13721
574	X	5	4	126	38.76	39.532	3808	5.03981	15865	0.797286	1067610	40.946	161237	1.58632	29028	1.05554	13789	0.214091	145677	50.2065	12456	0.154452
574	X	5	4	128	38.78	39.552	4366	6.01542	15885	0.831049	885833	35.3685	188985	1.93561	31797	1.20367	13600	0.219821	151205	54.25	13623	0.175854
574	X	5	4	130	38.8	39.572	3707	5.2333	16620	0.890924	961385	39.3308	159625	1.67518	27532	1.0679	12786	0.211756	139887	51.4259	12419	0.164262
574	X	5	4	132	38.82	39.592	3182	5.00974	16547	0.989216	923814	42.1486	148895	1.74263	23971	1.03691	9759	0.180247	118874	48.7364	10596	0.156299
574	X	5	4	134	38.84	39.612	4403	5.64929	18179	0.88567	944749	35.1273	190803	1.81986	32423	1.14297	10044	0.151182	164708	55.0315	15993	0.192253
574	X	5	4	136	38.86	39.632	3572	4.55111	15906	0.769526	1152080	42.5373	156622	1.48343	28594	1.00097	8559	0.127931	148840	49.3829	12296	0.14678
574	X	5	5	2	39.02	39.792	3418	4.37568	16083	0.781804	1221260	45.3068	166860	1.58794	27734	0.975494	14082	0.211488	139843	46.6193	11793	0.141448
574	X	5	5	4	39.04	39.812	3885	5.56534	13442	0.731175	928352	38.5386	150210	1.59959	26694	1.05064	12137	0.203967	139778	52.1424	12540	0.168305
574	X	5	5	6	39.06	39.832	4472	7.1053	18261	1.1017	440674	20.29	205519	2.4274	34133	1.49003	11206	0.208872	162233	67.123	17045	0.253732
574	X	5	5	8	39.08	39.852	4455	6.91038	18186	1.07114	529603	23.806	209306	2.41348	34502	1.4704	8922	0.162354	158251	63.9222	16788	0.243978
574	X	5	5	10	39.1	39.872	3489	4.51138	15277	0.750073	1141110	42.7581	156056	1.50002	27775	0.986736	11027	0.167268	146046	49.1756	12448	0.150802
574	X	5	5	12	39.12	39.892	4730	7.86551	19749	1.247	278805	13.4354	236707	2.92608	37294	1.7039	8248	0.160902	167147	72.3795	18082	0.281715
574	X	5	5	14	39.14	39.912	4683	6.89886	16555	0.926059	617546	26.3636	203008	2.22318	32722	1.32444	9735	0.168243	161269	61.8664	16603	0.229159
574	X	5	5	16	39.16	39.932	4632	6.30515	20696	1.06972	780706	30.7962	207059	2.09522	33598	1.25655	10860	0.173422	163911	58.1014	15869	0.202383
574	X	5	5	18	39.18	39.952	4824	5.96986	18389	0.864115	930959	33.3865	196368	1.80649	34142	1.16087	11755	0.170658	175226	56.4686	14920	0.172991
574	X	5	5	20	39.2	39.972	3726	4.62452	18025	0.849485	1194220	42.9528	178291	1.64498	29965	1.02182	16187	0.235688	150113	48.5169	13221	0.15374
574	X	5	5	22	39.22	39.992	3704	4.61177	17966	0.849386	1116240	40.2753	162771	1.50655	28583	0.977784	153313	2.23936	152258	49.3661	14897	0.173778
574	X	5	5	24	39.24	40.012	4065	5.13474	17020	0.816346	1035570	37.9069	177990	1.67133	31190	1.08246	15279	0.226413	161129	53.0009	13597	0.160916
574	X	5	5	26	39.26	40.032	4333	6.13597	16583	0.891691	736444	30.2216	202103	2.12753	31743	1.23504	9069	0.150661	160105	59.0406	14845	0.196958
574	X	5	5	28	39.28	40.052	4040	4.86343	14577	0.666325	1202710	41.9571	169316	1.51519	30286	1.00171	10379	0.146577	158555	49.7042	12901	0.145507
574	X	5	5	30	39.3	40.072	3768	4.48825	14057	0.635793	1296750	44.7615	162802	1.44157	28738	0.940505	11217	0.156744	152953	47.4434	11850	0.132246
574	X	5	5	32	39.32	40.092	3709	4.61058	15094	0.712459	1130710	40.7317	171079	1.5809	30079	1.02731	11861	0.172969	157587	51.0118	13079	0.152325
574	X	5	5	34	39.34	40.112	4023	4.80233	13648	0.618625	1261610	43.6425	161135	1.42988	29213	0.958113	12746	0.178494	155177	48.237	11892	0.133001
574	X	5	5	36	39.36	40.132	3958	4.92024	13393	0.632186	1172200	42.2276	164390	1.51913	29626	1.01186	12734	0.185705	152496	49.3651	11867	0.138213
574	X	5	5	38	39.38	40.152	3423	4.39968	13809	0.673959	1234190	45.9705	151047	1.44323	26256	0.927217	12064	0.181909	138222	46.264	11583	0.139487
574	X	5	5	40	39.4	40.172	3360	3.96058	12674	0.56727	1483550	50.6762	136498	1.19606	25900	0.838799	14673	0.202902	138288	42.4478	9996	0.110394
574	X	5	5	42	39.42	40.192	2831	3.29262	12296	0.543029	1645340	55.455	124877	1.07968	23461	0.7497	17398	0.237383	127256	38.5418	9247	0.100763
574	X	5	5	44	39.44	40.212	2827	3.23194	12065	0.523748	1695330	56.1661	125426	1.06594	22676	0.712267	32097	0.430477	126889	37.7758	8752	0.093744
574	X	5	5	46	39.46	40.232	3084	3.58574	13226	0.583916	1552570	52.3117	130063	1.12416	24814	0.792684	45585	0.621777	134958	40.8616	10877	0.118487
574	X	5	5	48	39.48	40.252	2790	3.40742	13738	0.637092	1435860	50.8178	138695	1.25919	25358	0.850893	33535	0.480472	133405	42.4273	10470	0.119803
574	X	5	5	50	39.5	40.272	3646	4.76452	16403	0.813922	1066500	40.3874	170963	1.66079	29787	1.06947	62186	0.95333	147489	50.1896	13146	0.160951
574	X	5	5	52	39.52	40.292	3150	3.74033	11813	0.532619	1530920	52.6787	122342	1.0799	22606	0.7375	37758	0.525964	131288	40.5953	9859	0.109681
574	X	5	5	54	39.54	40.312	4126	5.84502	18159	0.976799	759004	31.159	192489	2.02708	32399	1.26103	45114	0.749749	156646	57.7866	14670	0.194708
574	X	5	5	56	39.56	40.332	3066	3.7816	14940	0.699699	1421380	50.8038	132107	1.21126	22658	0.767828	15505	0.224349	132014	42.4009	9565	0.110532
574	X	5	5	58	39.58	40.352	4641	7.0614	18554	1.07195	503063	22.1812	217567	2.46083	36167	1.51192	10348	0.184707	164754	65.278	17542	0.250067
574	X	5	5	60	39.6	40.372	3844	5.34617	14426	0.761837	817625	32.9531	177075	1.83074	29817	1.13936	12355	0.201581	159030	57.5957	13160	0.17148
574	X	5	5	62	39.62	40.392	4710	7.28522	17664	1.03745	399824	17.9215	230035	2.64499	37051	1.57456	8944	0.162294	171624	69.1276	17004	0.246417
574	X	5	5	64	39.64	40.412	4550	7.1879	17587	1.05497	403605	18.4769	227939	2.67681	35711	1.55	8618	0.159715	166863	68.6439	16878	0.24981
574	X	5	5	66	39.66	40.432	4495	6.84938	17749	1.02696	466114	20.5824	222538	2.52078	34684	1.45207	9700	0.173397	169227	67.1495	17199	0.24554
574	X	5	5	68	39.68	40.452	5001	7.01842	16786	0.894513	492141	20.015	222966	2.32611	36856	1.42111	8516	0.140206	185939	67.9523	17669	0.232323
574	X	5	5	70	39.7	40.472	4970	7.14566	17879	0.976081	435249	18.1345	234006	2.50105	38492	1.52053	9723	0.163996	185129	69.3125	18233	0.245608
574	X	5	5	72	39.72	40.492	5099	7.34755	17589	0.9624	361843	15.1099	240820	2.57964	39857	1.57798	8709	0.147222	191982	72.0393	17481	0.236006
574	X	5	5	74	39.74	40.512	4487	6.58204	15692	0.874056	510632	21.7068	215121	2.34583	34966	1.40925	8264	0.142214	174679	66.7262	15546	0.213659
574	X	5	5	76	39.76	40.532	4170	6.63166	16453	0.993547	438558	20.2114	219859	2.5992	34490	1.50702	8201	0.153003	163369	67.6562	16645	0.248009
574	X	5	5	78	39.78	40.552	4113	5.29561	14599	0.713735	892346	33.2946	173627	1.66182	30298	1.07179	8883	0.134173	172000	57.6683	13263	0.159992
574	X	5	5	80	39.8	40.572	3774	5.94693	14334	0.85766	643635	29.391	188384	2.2067	29766	1.28869	7999	0.147868	146134	59.9645	13325	0.196724
574	X	5	5	82	39.82	40.592	3572	4.27594	12913	0.586954	1355970	47.0385	130459	1.16092	24168	0.794876	12943	0.181762	147079	45.8482	10061	0.112839
574	X	5	5	84	39.84	40.612	2790	3.32329	12774	0.57776	1463970	50.5334	118031	1.04513	20492	0.670635	16631	0.232397	140291	43.5156	9117	0.101745
574	X	5	5	86	39.86	40.632	2749	3.23625	12597	0.563107	1505580	51.3634	116027	1.01539	20817	0.673324	32265	0.445602	138953	42.5977	9533	0.105147
574	X	5	5	88	39.88	40.652	1933	2.28319	11219	0.503178	1651540	56.5306	104116	0.91419	18042	0.585509	38865	0.538539	125350	38.5555	8072	0.0893284
574	X	5	5	90	39.9	40.672	2437	2.92318	11453	0.521645	1600920	55.6485	109932	0.98024	19518	0.64324	35823	0.504091	123853	38.6863	8259	0.0928165
574	X	5	5	92	39.92	40.692	3708	4.66814	12744	0.609209	1065060	38.8561	144671	1.35392	25835	0.893616	24923	0.368088	162000	53.1093	12006	0.141612
574	X	5	5	94	39.94	40.712	3843	5.39608	14358	0.765524	837604	34.0824	172736	1.80302	29093	1.12237	18407	0.303207	154121	56.3535	13218	0.173889
574	X	5	5	96	39.96	40.732	3443	4.25209	16250	0.762036	1176940	42.1212	149221	1.36995	26852	0.91113	78769	1.14122	153281	49.2952	12718	0.147157
574	X	5	5	98	39.98	40.752	3950	5.00532	17778	0.85541	974418	35.7819	168325	1.58559	31929	1.11163	41311	0.614113	166292	54.8728	14592	0.17324
574	X	5	5	100	40	40.772	4203	5.28539	17930	0.85616	979337	35.6889	173289	1.61993	30406	1.05055	12694	0.187268	168423	55.1532	13465	0.158644
574	X	5	5	102	40.02	40.792	4007	5.14698	17748	0.865645	1039250	38.6844	172647	1.64855	28936	1.0212	13226	0.199301	156285	52.276	13125	0.157954
574	X	5	5	104	40.04	40.812	4486	5.83506	17615	0.870012	905969	34.1493	178141	1.7225	30489	1.0896	12823	0.19567	165234	55.9676	13971	0.17026
574	X	5	5	106	40.06	40.832	3387	4.88999	13896	0.761797	976909	40.8724	143375	1.53877	25890	1.02698	10997	0.186258	134512	50.5714	11265	0.152378
574	X	5	5	108	40.08	40.852	3277	4.62475	15013	0.804518	1008340	41.2385	142096	1.49074	25890	1.00388	10600	0.175495	137453	50.5147	11154	0.147483
574	X	5	5	110	40.1	40.872	2828	3.68859	13462	0.666725	1336290	50.5086	135010	1.30905	23016	0.8248	10536	0.161215	125751	42.7114	10614	0.129705
574	X	5	5	112	40.12	40.892	3300	4.49272	11422	0.590465	1056020	41.6631	148058	1.49843	24657	0.922304	9960	0.159075	142525	50.5287	11383	0.145195
574	X	5	5	114	40.14	40.912	2513	3.15631	11386	0.54302	1424530	51.8491	123275	1.15099	22039	0.760533	10429	0.153666	129240	42.2704	9862	0.116052
574	X	5	5	116	40.16	40.932	1837	2.10006	7068	0.306814	2054680	68.0689	84160	0.715215	15427	0.484554	14910	0.199962	94269	28.0635	5697	0.0610192
574	X	5	5	118	40.18	40.952	2034	2.45629	7193	0.329834	1799430	62.972	95932	0.861194	18426	0.611362	14801	0.209685	103282	32.4792	7115	0.0805011
574	X	5	5	120	40.2	40.972	1585	1.76433	7278	0.307623	2179900	70.3185	77891	0.644533	15447	0.472424	14919	0.194821	90527	26.2409	5449	0.0568283
574	X	5	5	122	40.22	40.992	1694	2.08482	8858	0.413949	1841650	65.6817	84956	0.777243	16021	0.541729	15871	0.229143	94211	30.1931	6799	0.0783966
574	X	5	5	124	40.24	41.012	2763	3.7533	10939	0.564243	1313270	51.6973	125910	1.27146	23571	0.879728	14468	0.230562	117243	41.4735	10210	0.129944
574	X	5	5	126	40.26	41.032	2562	4.14824	11122	0.683792	1050210	49.277	109026	1.31227	19797	0.880688	10650	0.202293	102847	43.3638	8696	0.131917
574	X	5	5	128	40.28	41.052	1931	3.52622	11221	0.778065	927560	49.0854	97368	1.32176	17664	0.886247	8515	0.182415	92702	44.0827	8019	0.137197
574	X	5	5	130	40.3	41.072	2221	4.0455	10360	0.716539	903441	47.6877	98372	1.332	18124	0.907018	7662	0.163724	94870	44.9991	8699	0.148454
574	X	5	5	132	40.32	41.092	2657	3.64286	10925	0.568759	1355360	53.8502	112051	1.14202	21676	0.816522	11036	0.177505	111173	39.6918	8584	0.110265
574	X	5	5	134	40.34	41.112	3516	4.28889	13764	0.637525	1388890	49.0961	142243	1.28984	27619	0.925639	11422	0.16345	136867	43.4756	10762	0.122995
574	X	5	5	136	40.36	41.132	3105	3.54996	11768	0.510883	1641550	54.3875	137606	1.16952	26145	0.821276	12397	0.166275	131960	39.2876	9986	0.106968
574	X	5	5	138	40.38	41.152	3207	3.74692	13188	0.585074	1546860	52.3731	133139	1.15635	25065	0.804602	11204	0.153566	134968	41.0636	10672	0.11682
574	X	5	5	140	40.4	41.172	3986	4.41761	15110	0.635874	1475780	47.3973	158778	1.30812	29256	0.890847	10324	0.134229	156231	45.0888	12254	0.127241
574	X	5	5	142	40.42	41.192	3990	4.94567	15377	0.723737	1166240	41.8914	172937	1.59349	30782	1.0483	8416	0.122379	153403	49.5151	13774	0.15996
574	X	5	6	2	40.52	41.292	2909	3.65854	10038	0.479367	1474440	53.7371	117713	1.10052	22432	0.775123	8214	0.12119	122216	40.0261	8662	0.102066
574	X	5	6	4	40.54	41.312	2596	3.39706	8963	0.445357	1483040	56.2386	115882	1.12726	22646	0.814195	8219	0.126173	110767	37.7451	8668	0.106271
574	X	5	6	6	40.56	41.332	2552	3.30487	7970	0.391913	1618480	60.7386	103817	0.999428	20541	0.73086	8308	0.126217	99675	33.6134	7807	0.0947232
574	X	5	6	8	40.58	41.352	2214	2.6042	8544	0.381606	1941380	66.1744	89865	0.785772	17316	0.559607	9858	0.13603	95592	29.28	7115	0.0784098
574	X	5	6	10	40.6	41.372	2243	2.47935	8271	0.347154	2041940	65.4084	95088	0.781344	18799	0.570927	11583	0.150202	104906	30.1967	6370	0.0659698
574	X	5	6	12	40.62	41.392	1678	1.97284	8133	0.363085	1954670	66.5973	90443	0.790467	18178	0.587198	12474	0.17205	96163	29.4415	6857	0.0755323
574	X	5	6	14	40.64	41.412	2067	2.33261	8261	0.35399	2041260	66.7548	88178	0.739726	16791	0.520615	13698	0.181345	98844	29.0471	6601	0.0697926
574	X	5	6	16	40.66	41.432	2928	3.45986	10976	0.49248	1645270	56.3387	116611	1.02432	21597	0.701164	14013	0.194252	122504	37.6955	8467	0.0937379
574	X	5	6	18	40.68	41.452	2693	2.88785	12139	0.494286	1942200	60.3551	112552	0.897223	21248	0.626029	15230	0.191596	123376	34.4525	9496	0.0954063
574	X	5	6	20	40.7	41.472	3790	4.60016	15794	0.727919	1305240	45.91	162668	1.46773	27976	0.932949	14193	0.202095	145562	46.008	13296	0.1512
574	X	5	6	22	40.72	41.492	3558	4.35965	17892	0.832456	1322360	46.9546	149639	1.36301	25799	0.868534	14922	0.214497	141847	45.2603	12808	0.147036
574	X	5	6	24	40.74	41.512	3938	4.58126	16917	0.747291	1425840	48.0689	145635	1.25946	26176	0.836664	17103	0.233415	145697	44.1379	12396	0.135111
574	X	5	6	26	40.76	41.532	4639	5.5246	18163	0.821335	1112200	38.3834	177716	1.5733	31768	1.03945	23948	0.334575	168089	52.1275	17553	0.195851
574	X	5	6	28	40.78	41.552	3931	4.54151	18101	0.794066	1308760	43.8166	170536	1.46461	29647	0.941058	26046	0.353009	159242	47.9078	16753	0.181338
574	X	5	6	30	40.8	41.572	3826	4.54999	15069	0.680467	1242060	42.8046	167048	1.47678	28949	0.945884	11776	0.16429	158874	49.2006	15921	0.177392
574	X	5	6	32	40.82	41.592	4049	4.66866	17432	0.763217	1329510	44.4241	155839	1.33576	27807	0.88092	10591	0.143261	158573	47.6129	15847	0.171194
574	X	5	6	34	40.84	41.612	4282	5.56082	17944	0.884848	867580	32.6501	191563	1.84932	31512	1.12436	9254	0.140984	170222	57.5651	18442	0.224387
574	X	5	6	36	40.86	41.632	4294	5.01591	16726	0.741885	1181700	40.0015	178765	1.55231	30995	0.994758	10369	0.142093	168857	51.3639	17146	0.18765
574	X	5	6	38	40.88	41.652	2723	2.84369	11088	0.439687	1988810	60.1881	116518	0.904556	21051	0.604011	12740	0.156081	127794	34.7533	11309	0.110651
574	X	5	6	40	40.9	41.672	1796	1.74505	7159	0.264125	2536670	71.4246	81929	0.591763	13511	0.360684	14902	0.169861	100271	25.3704	8076	0.0735183
574	X	5	6	42	40.92	41.692	1581	1.54078	6692	0.24764	2569600	72.5701	74587	0.540356	13053	0.349508	16279	0.186116	96486	24.4864	8669	0.0791545
574	X	5	6	44	40.94	41.712	1706	1.67966	6842	0.25579	2499800	71.3233	73005	0.534324	12995	0.351526	17432	0.201344	99787	25.584	7597	0.0700783
574	X	5	6	46	40.96	41.732	1371	1.29131	5642	0.201782	2774590	75.7311	64255	0.449892	9606	0.248584	17115	0.189111	89025	21.8351	6022	0.0531412
574	X	5	6	48	40.98	41.752	1738	1.70085	6939	0.257851	2574320	73.0063	72820	0.529755	11247	0.302406	16260	0.186674	93967	23.9465	7590	0.0695914
574	X	5	6	50	41	41.772	1682	1.7569	7922	0.314206	2231380	67.5426	86593	0.672378	14530	0.416991	14630	0.179273	106760	29.039	8033	0.0786137
574	X	5	6	52	41.02	41.792	2293	2.42821	10349	0.416138	2030190	62.3018	102726	0.808669	19060	0.554553	12909	0.16037	120554	33.2441	8679	0.0861092
574	X	5	6	54	41.04	41.812	2803	3.07209	11244	0.467938	1761500	55.947	121173	0.987247	20460	0.616106	12171	0.156489	135438	38.6548	9577	0.0983419
574	X	5	6	56	41.06	41.832	4129	5.37403	17755	0.877471	859183	32.4059	199115	1.9265	32464	1.1609	9633	0.147084	170860	57.9092	16315	0.198949
574	X	5	6	58	41.08	41.852	2712	3.04757	12017	0.512764	1751420	57.0344	122209	1.02088	19700	0.608232	10038	0.13233	128315	37.5486	9049	0.0952716
574	X	5	6	60	41.1	41.872	4269	5.65179	15822	0.795386	828308	31.7786	189836	1.8683	29755	1.08233	8261	0.128304	169743	58.5199	14143	0.175428
574	X	5	6	62	41.12	41.892	3948	5.57291	15999	0.85754	721610	29.5182	197637	2.07387	30756	1.19281	7886	0.13059	164465	60.4546	15081	0.199449
574	X	5	6	64	41.14	41.912	3964	4.89232	14566	0.682619	1107690	39.6171	175583	1.61092	29484	0.999784	8203	0.118769	161544	51.9187	13816	0.159758
574	X	5	6	66	41.16	41.932	4277	5.48392	15646	0.761749	943739	35.066	185578	1.76883	29684	1.04571	8682	0.130593	166432	55.5699	14422	0.173251
574	X	5	6	68	41.18	41.952	3205	4.12219	12422	0.606663	1276090	47.5624	140692	1.34517	23401	0.826937	9340	0.140927	135161	45.2691	10501	0.12654
574	X	5	6	70	41.2	41.972	4239	5.40315	16128	0.780586	889998	32.8742	188775	1.7887	31577	1.10584	8281	0.123827	173974	57.7456	14911	0.178069
574	X	5	6	72	41.22	41.992	2860	3.29547	12438	0.5442	1502030	50.1548	129713	1.11107	22224	0.703577	8326	0.112547	146507	43.9603	10933	0.118029
574	X	5	6	74	41.24	42.012	3058	3.62688	13309	0.599374	1395930	47.9779	146742	1.29377	24346	0.793344	9339	0.12994	147145	45.4457	11984	0.133167
574	X	5	6	76	41.26	42.032	3369	3.80128	11403	0.488546	1539520	50.3381	135270	1.13459	22924	0.710654	8673	0.114801	147354	43.2955	11023	0.116527
574	X	5	6	78	41.28	42.052	2773	3.27694	11670	0.523656	1598410	54.7382	116994	1.02776	19718	0.640206	8891	0.123259	128563	39.5627	9686	0.107241
574	X	5	6	80	41.3	42.072	2901	3.22773	10899	0.460461	1664060	53.6539	119040	0.98458	19280	0.589379	9100	0.118779	141033	40.8622	9876	0.102951
574	X	5	6	82	41.32	42.092	2106	2.30382	10854	0.450855	1908420	60.4988	100189	0.81474	16957	0.509657	11028	0.141526	123535	35.191	8745	0.0896289
574	X	5	6	84	41.34	42.112	1939	1.99448	9373	0.366089	2094840	62.4432	89624	0.685306	14798	0.418208	12450	0.150234	126449	33.8702	7500	0.0722788
574	X	5	6	86	41.36	42.132	2130	2.26039	9678	0.389983	1936240	59.5449	98112	0.773988	16443	0.479427	12995	0.161781	131364	36.302	8804	0.0875349
574	X	5	6	88	41.38	42.152	2678	2.88027	11502	0.469735	1833490	57.1457	106684	0.852964	18134	0.535864	13546	0.170916	135116	37.8426	10114	0.101916
574	X	5	6	90	41.4	42.172	2514	2.84717	13564	0.583302	1672630	54.8948	111680	0.940227	19025	0.591987	13113	0.17422	135118	39.8486	11274	0.119626
574	X	5	6	92	41.42	42.192	2713	3.14156	13647	0.600053	1588020	53.2888	125229	1.07798	20947	0.666432	13678	0.185809	135672	40.9108	11854	0.128605
574	X	5	6	94	41.44	42.212	3014	3.45619	14798	0.644338	1558190	51.7795	124918	1.06485	21812	0.687207	14199	0.191011	140812	42.048	11999	0.128913
574	X	5	6	96	41.46	42.232	3089	3.60331	16053	0.711044	1459730	49.3444	132943	1.15281	22966	0.73605	14121	0.19324	145263	44.1255	12231	0.133673
574	X	5	6	98	41.48	42.252	3691	4.44177	15652	0.715218	1284490	44.7946	145664	1.30308	24874	0.822424	11238	0.158653	151975	47.625	12346	0.139199
574	X	5	6	100	41.5	42.272	3062	3.96994	15880	0.781782	1292700	48.5692	135481	1.30577	23333	0.831165	11231	0.170822	131002	44.2291	11714	0.142292
574	X	5	6	102	41.52	42.292	2706	3.15483	14578	0.645361	1646340	55.6226	110521	0.957859	20797	0.666174	13193	0.180443	127376	38.6712	9298	0.101563
574	X	5	6	104	41.54	42.312	2367	2.61347	12426	0.520964	1879460	60.1363	102932	0.844849	18514	0.561641	14603	0.189152	121910	35.0518	7907	0.0817956
574	X	5	6	106	41.56	42.332	2224	2.55712	13185	0.575644	1817760	60.5671	104439	0.892664	17940	0.566732	15004	0.202382	115340	34.5341	9677	0.104245
574	X	5	6	108	41.58	42.352	2285	2.49867	12179	0.505697	1964820	62.2628	97879	0.795647	17441	0.524001	16667	0.21381	116287	33.1135	8383	0.0858855
574	X	5	6	110	41.6	42.372	2238	2.41358	12219	0.500374	1958030	61.1935	96082	0.770288	16734	0.495839	17662	0.223455	122198	34.3177	8445	0.0853297
574	X	5	6	112	41.62	42.392	2383	2.52774	11814	0.475841	2013090	61.8805	95909	0.756269	17214	0.501682	17130	0.213164	121491	33.5586	8678	0.0862434
574	X	5	6	114	41.64	42.412	2397	2.64756	10309	0.432366	1860870	59.563	97417	0.799874	17402	0.528099	17067	0.221148	124204	35.7244	8068	0.0834915
574	X	5	6	116	41.66	42.432	1573	1.61166	7986	0.310692	2430450	72.1628	72919	0.555384	12528	0.352667	19631	0.235958	92638	24.7164	5676	0.054486
574	X	5	6	118	41.68	42.452	1031	1.03606	6756	0.257794	2569150	74.8168	64043	0.478417	11567	0.319364	21719	0.256044	87081	22.7877	5080	0.0478287
574	X	5	6	120	41.7	42.472	1853	1.94168	8832	0.351412	2291430	69.581	80522	0.627227	15016	0.432309	21076	0.259082	98021	26.7468	6163	0.060505
574	X	5	6	122	41.72	42.492	1957	2.10886	11082	0.453452	2089150	65.2392	85436	0.684393	15412	0.456303	21065	0.266296	109484	30.7226	6822	0.0688757
574	X	5	6	124	41.74	42.512	2549	2.76851	13755	0.567275	1937750	60.9897	108230	0.873841	20138	0.60094	20572	0.26212	119688	33.8515	8458	0.0860681
574	X	5	6	128	41.78	42.552	2168	2.42297	15630	0.663291	1841390	59.6372	94709	0.786843	17947	0.551085	17711	0.232209	122316	35.5978	10374	0.108626
574	X	5	6	130	41.8	42.572	2393	2.68274	14947	0.636278	1838140	59.7169	103195	0.860009	18470	0.568907	17334	0.227972	120522	35.1847	11661	0.122481
574	X	5	6	132	41.82	42.592	2533	2.77695	14043	0.584587	1782120	56.6178	108948	0.887893	19135	0.576368	15566	0.200197	133966	38.2454	10794	0.11087
574	X	5	6	136	41.86	42.632	2803	3.11736	11855	0.500637	1858930	59.9115	111956	0.925594	20777	0.634871	16213	0.211532	119494	34.6068	8796	0.0916532
574	X	5	6	138	41.88	42.652	2048	2.03643	10139	0.382817	2482130	71.5232	89485	0.661452	15048	0.411108	21429	0.249971	95274	24.6698	7003	0.0652411
574	X	5	6	140	41.9	42.672	1655	1.69585	9059	0.352474	2424480	71.9933	84669	0.644947	15646	0.440486	23200	0.278886	91908	24.5242	7270	0.0697948
574	X	5	6	142	41.92	42.692	1967	1.9876	10000	0.383691	2376160	69.58	95499	0.717353	17141	0.475883	22454	0.266175	100812	26.527	6573	0.0622282
574	X	5	6	144	41.94	42.712	1866	2.00778	8531	0.348547	2245800	70.026	83914	0.671194	15143	0.447667	21261	0.268372	93396	26.1689	6109	0.0615848
574	X	5	7	2	42.02	42.792	1306	1.41159	6468	0.265455	2414800	75.636	61763	0.496251	12128	0.360157	21308	0.270181	76419	21.5088	5091	0.0515544
574	X	5	7	4	42.04	42.812	1603	1.53495	6914	0.251389	2730540	75.769	65303	0.464839	11944	0.314231	24032	0.269959	85640	21.3545	4586	0.0411427
574	X	5	7	6	42.06	42.832	1612	1.63994	8240	0.318308	2495410	73.5679	71620	0.541635	13321	0.372339	22413	0.267492	87714	23.2372	5787	0.0551588
574	X	5	7	8	42.08	42.852	2516	2.77308	12318	0.515524	1972380	62.9977	103589	0.848739	19863	0.601499	21354	0.276108	111152	31.9022	8252	0.0852136
574	X	5	7	10	42.1	42.872	3062	3.24325	11962	0.481101	1973720	60.582	114934	0.904967	22509	0.655044	22040	0.273864	122438	33.7709	8947	0.0887874
574	X	5	7	12	42.12	42.892	2632	2.83272	16616	0.679049	1936170	60.3872	117678	0.941503	22015	0.650991	21391	0.270083	121833	34.1455	9217	0.0929406
574	X	5	7	14	42.14	42.912	2215	2.1304	9588	0.350165	2526020	70.4056	87166	0.623223	16319	0.431241	24550	0.277005	102678	25.7168	7281	0.065611
574	X	5	7	16	42.16	42.932	4099	4.55966	21044	0.888873	1487000	47.9344	167591	1.38584	30730	0.939194	20581	0.268577	151466	43.8754	14205	0.148045
574	X	5	7	18	42.18	42.952	4351	4.42379	19638	0.758158	1650270	48.6233	166353	1.25732	30530	0.852847	22667	0.270363	164910	43.6621	15971	0.152137
574	X	5	7	20	42.2	42.972	3838	3.94232	18623	0.726362	1798840	53.5454	149887	1.14451	26907	0.759365	20780	0.250403	147679	39.5018	13491	0.129834
574	X	5	7	22	42.22	42.992	4085	5.01265	19469	0.907143	1234770	43.9079	179729	1.63946	30553	1.03007	16469	0.237077	147344	47.0824	15938	0.183234
574	X	5	7	24	42.24	43.012	2558	2.63338	16300	0.637173	2097010	62.56	120320	0.920787	22245	0.629193	18656	0.225309	120433	32.2857	11253	0.108537
574	X	5	7	26	42.26	43.032	2642	2.70213	11733	0.455658	2109990	62.5368	116473	0.885537	22615	0.635489	19276	0.23128	121874	32.459	9818	0.0940793
574	X	5	7	28	42.28	43.052	2299	2.26986	12812	0.480324	2444490	69.941	95541	0.701228	18323	0.497045	27448	0.317921	100001	25.7108	8836	0.0817362
574	X	5	7	30	42.3	43.072	1533	1.39389	7084	0.24458	2957550	77.9294	69078	0.466911	12484	0.311873	24843	0.264995	81631	19.3282	7058	0.0601265
574	X	5	7	32	42.32	43.092	1658	1.66053	11514	0.437871	2614650	75.8856	78555	0.584852	14371	0.395447	21417	0.251634	79509	20.7363	5097	0.0478273
574	X	5	7	34	42.34	43.112	1498	1.47734	7685	0.287787	2695590	77.0382	64748	0.474684	11588	0.313991	22582	0.261264	78280	20.1035	4677	0.0432151
574	X	5	7	36	42.36	43.132	1089	1.05595	6325	0.232881	2902640	81.5629	53556	0.386041	9857	0.262603	24104	0.274191	64113	16.1888	4040	0.0367025
574	X	5	7	38	42.38	43.152	539	0.508448	4780	0.171215	3101020	84.7707	42684	0.299317	6470	0.167687	33078	0.366054	55719	13.6871	3330	0.0294307
574	X	5	7	40	42.4	43.172	970	1.07064	4242	0.177787	2548480	81.5148	43944	0.360562	7820	0.237147	28920	0.374471	56459	16.2277	3572	0.0369387
574	X	5	7	42	42.42	43.192	494	0.713539	4248	0.232987	1909000	79.9059	37721	0.405026	6261	0.24847	37128	0.62913	47380	17.8212	3229	0.0436976
