# Supplementary material for: Variations in the Biological Pump through the Miocene: Evidence from organic carbon burial in Pacific Ocean sediments
Source: Copernicus journal article supplement (doi:10.5194/cp-2024-34), 2024-05-27
Supplement: Supplementary file 35 [file SuppTable_S7_884B_AgeDepth.xlsx]

## Sheet: SuppTable_S7_U884_AgeDepth
Site	Hole	Magnetic Chron	Age (Ma)	Depth (mbsf)
884	B	present	0	0
884	B	B c1n.1n	0.781	42.5
884	B	T c1r.1n	0.988	54.55
884	B	B c1r.1n	1.072	59.4
884	B	B c2n.1n	1.945	96.9
884	B	T c2r.1n	2.128	107.1
884	B	B c2r.1n	2.148	108.2
884	B	B c2An.1n	3.032	148.1
884	B	T C2An.2n	3.116	152.35
884	B	B C2An.2n	3.207	159.6
884	B	B C2An.3n	3.596	179.2
884	B	T c3n.3n	4.799	252.1
884	B	B c3n.3n	4.896	258.4
884	B	T c3n.4n	4.997	266.8
884	B	B c3n.4n	5.235	276.7
884	B	T c3An.1n	6.023	311.55
884	B	B c3An.1n	6.272	325
884	B	T c3An.2n	6.386	334.5
884	B	B c3An.2n	6.727	348
884	B	T C3Bn	7.104	367.6
884	B	B C3Bn	7.214	369.1
884	B	T C3Br.1n	7.262	369.1
884	B	B C3Br.1n	7.305	370.25
884	B	T C4n.1n	7.537	374.2
884	B	B C4n.1n	7.651	379.65
884	B	T C4n.2n	7.701	381.5
884	B	B C4n.2n	8.107	400.2
884	B	T C4An.1n	8.771	418.45
884	B	B C4An.1n	9.105	436.15
884	B	T C4Ar.1n	9.311	440.65
884	B	B C4Ar.1n	9.426	445.2
884	B	T C4Ar.2n	9.647	451.1
884	B	B C4Ar.2n	9.721	453.1
884	B	T C5n.1n	9.786	453.5
884	B	B C5n.1n	9.937	457.3
884	B	T C5n.2n	9.984	458.75
884	B	B C5n.2n	11.056	502.5
884	B	T C5An.1n	12.049	520.7
884	B	B C5An.1n	12.174	522.1
884	B	T C5An.2n	12.272	523
884	B	B C5An.2n	12.474	526
884	B	T C5Ar.1n	12.735	528.5
884	B	B C5Ar.1n	12.77	530
884	B	T C5Ar.2n	12.829	531
884	B	B C5Ar.2n	12.887	532.5
884	B	T C5AAn.1n	13.032	535
884	B	B C5AB.1n	13.608	542.3
884	B	T C5ADn.1n	14.163	550
884	B	B C5ADn.1n	14.609	559
884	B	T C5Cn.1n	15.974	580
884	B	T C5Dn.1n	17.235	594.2
884	B	B C5Dn.1n	17.533	599
884	B	T C5En.1n	18.056	602.8
884	B	B C6n.1n	19.722	610
