# Supplementary material for: Variations in the Biological Pump through the Miocene: Evidence from organic carbon burial in Pacific Ocean sediments
Source: Copernicus journal article supplement (doi:10.5194/cp-2024-34), 2024-05-27
Supplement: Supplementary file 37 [file SuppTable_S8_884B_carb_Data.xlsx]

## Sheet: U884B_carb_Data
Site	Hole	Core	Type	Section	interval (cm)	Depth (mbsf)	Age (Ma)	Bulk MAR (g/cm2/kry)	CaCO3 (wt %0	CaCO3 MAR (g/cm2/kyr	C-org (wt %)	C-org MAR (g/cm2/kyr)	Data Source
884	B	1	H	1	14	0.14	0.00257271	2.78613	10.8	0.300902	0.19	0.00529365	ship
884	B	1	H	1	32	0.32	0.00588047	3.1671	10	0.31671	0.24	0.00760104	ship
884	B	1	H	1	41	0.41	0.00753435	2.88111	13.8	0.397593	0.5	0.0144056	ship
884	B	1	H	1	46	0.46	0.00845318	2.59089	10.1	0.26168	0.64	0.0165817	ship
884	B	1	H	1	53	0.53	0.00973953	2.36272	10.1	0.238634	0.74	0.0174841	ship
884	B	1	H	1	60	0.6	0.0110259	2.63305	5	0.131652	0.75	0.0197479	ship
884	B	1	H	1	68	0.68	0.012496	3.23201	1.2	0.0387842	0.74	0.0239169	ship
884	B	1	H	1	72	0.72	0.0132311	3.48524	0.7	0.0243967	0.73	0.0254423	ship
884	B	1	H	3	76	3.76	0.0690955	3.53004	0	0	0.4	0.0141202	ship
884	B	2	H	1	74	7.24	0.133046	3.53016	1.7	0.0600126	0.15	0.00529523	ship
884	B	2	H	3	77	10.27	0.188726	3.70053	0.4	0.0148021	0.46	0.0170224	ship
884	B	2	H	6	76	14.76	0.271237	4.14957	0	0	0.49	0.0203329	ship
884	B	3	H	1	77	16.77	0.308173	3.50603	0	0	0.34	0.0119205	ship
884	B	3	H	3	70	19.7	0.362016	3.54969	0.5	0.0177484	0.42	0.0149087	ship
884	B	3	H	6	61	24.11	0.443057	3.90228	1.2	0.0468274	0.39	0.0152189	ship
884	B	4	H	1	111	26.61	0.488998	4.11132	0	0	0.45	0.0185009	ship
884	B	4	H	3	111	29.61	0.544127	3.53628	0	0	0.37	0.0130842	ship
884	B	4	H	5	76	32.26	0.592825	3.54407	0	0	0.32	0.011341	ship
884	B	5	H	3	77	38.77	0.712456	2.80325	7.2	0.201834	0.35	0.00981137	ship
884	B	6	H	3	76	48.26	0.879948	4.47738	0	0	0.49	0.0219391	ship
884	B	7	H	3	75	57.75	1.04342	3.36906	0	0	0.4	0.0134763	ship
884	B	8	H	3	76	67.26	1.25498	2.89703	0	0	0.47	0.013616	ship
884	B	9	H	3	76	76.76	1.47614	2.40906	0	0	0.29	0.00698629	ship
884	B	12	X	1	35	87.65	1.72966	2.70105	0	0	0.3	0.00810316	ship
884	B	13	X	3	77	97.07	1.94805	3.41924	0	0	0.18	0.00615463	ship
884	B	14	X	3	77	106.77	2.12208	3.52912	0	0	0.13	0.00458785	ship
884	B	15	X	3	76	116.36	2.32879	1.8742	0	0	0.2	0.00374841	ship
884	B	16	X	3	76	125.96	2.54148	2.76962	0	0	0.22	0.00609317	ship
884	B	17	X	3	77	135.57	2.75439	2.32406	0	0	0.21	0.00488052	ship
884	B	18	X	1	77	142.27	2.90283	2.64113	11.1	0.293166	0.2	0.00528227	ship
884	B	18	X	3	77	145.27	2.9693	2.46932	8.3	0.204954	0.32	0.00790184	ship
884	B	19	X	1	78	151.88	3.10671	3.61344	9.8	0.354117	0.21	0.00758822	ship
884	B	19	X	6	78	159.38	3.20424	3.10315	2.5	0.0775788	0.19	0.00589599	ship
884	B	21	X	3	76	174.26	3.49796	3.22587	15.4	0.496783	0.18	0.00580656	ship
884	B	22	X	3	77	183.87	3.67306	2.89958	0	0	0.34	0.00985858	ship
884	B	23	X	3	77	193.57	3.83313	3.22698	0	0	0.29	0.00935824	ship
884	B	24	X	3	76	203.16	3.99139	3.07898	0	0	0.27	0.00831325	ship
884	B	25	X	3	77	212.87	4.15162	2.98367	0	0	0.24	0.00716081	ship
884	B	26	X	3	76	222.46	4.30988	3.21603	0	0	0.45	0.0144721	ship
884	B	27	X	3	76	232.16	4.46995	3.3796	0	0	0.21	0.00709715	ship
884	B	29	X	3	76	251.36	4.78679	3.38877	0	0	0.28	0.00948855	ship
884	B	30	X	1	10	257.45	4.88137	4.36622	0.289173	0.0126259	0.201543	0.00879979	lab
884	B	30	X	3	77	261.07	4.9281	4.15661	0	0	0.19	0.00789757	ship
884	B	30	X	5	13	263.48	4.95708	3.2008	0.253297	0.00810755	0.254592	0.00814899	lab
884	B	31	X	2	96	269.51	5.06215	2.97763	8.97945	0.267374	0.205145	0.00610845	lab
884	B	31	X	3	77	270.77	5.09244	3.20566	15.3	0.490466	0.19	0.00609076	ship
884	B	31	X	6	99	275.54	5.20711	2.72282	0.111392	0.00303299	0.160645	0.00437406	lab
884	B	32	X	2	32	278.57	5.27728	2.69187	0.196619	0.00529273	0.208642	0.00561638	lab
884	B	32	X	3	77	280.47	5.32024	2.38041	0	0	0.19	0.00452278	ship
884	B	33	X	1	125	287.6	5.48146	2.27322	0.0629113	0.00143011	0.271067	0.00616194	lab
884	B	33	X	2	77	288.57	5.50339	2.16938	0	0	0.25	0.00542346	ship
884	B	33	X	5	95	293.3	5.61035	2.87214	0.942573	0.027072	0.261087	0.00749876	lab
884	B	34	X	3	28	299.33	5.74669	2.30016	0.0796689	0.00183251	0.310146	0.00713386	lab
884	B	34	X	3	76	299.76	5.75641	1.94911	0	0	0.19	0.00370332	ship
884	B	35	X	1	10	305.85	5.89412	3.02616	0.0935121	0.00282982	0.324451	0.00981838	lab
884	B	35	X	3	77	309.47	5.97597	2.72731	0	0	0.22	0.00600008	ship
884	B	36	X	2	106	317.91	6.14074	2.98561	2.07233	0.0618717	0.261628	0.00781118	lab
884	B	36	X	3	77	319.07	6.16222	2.96309	0	0	0.26	0.00770403	ship
884	B	36	X	6	109	323.94	6.25238	4.87966	0.0857533	0.00418447	0.0557968	0.00272269	lab
884	B	37	X	3	77	328.77	6.31724	3.30425	1.2	0.0396509	0.13	0.00429552	ship
884	B	37	X	4	42	329.97	6.33164	3.34316	1.06358	0.0355572	0.309398	0.0103437	lab
884	B	38	X	1	20	334.55	6.38726	2.95252	2.30241	0.0679792	0.320916	0.0094751	lab
884	B	38	X	3	76	338.06	6.47592	2.91276	4	0.11651	0.23	0.00669934	ship
884	B	38	X	3	80	338.15	6.4782	2.74128	4.01542	0.110074	0.25129	0.00688855	lab
884	B	38	X	5	100	341.35	6.55903	2.4187	0.238355	0.00576508	0.246673	0.00596626	lab
884	B	39	X	1	80	344.75	6.64491	2.87306	0.125868	0.00361625	0.33313	0.009571	lab
884	B	39	X	3	78	347.68	6.71892	2.97154	0	0	0.17	0.00505163	ship
884	B	39	X	3	120	348.15	6.72989	2.86071	0.139669	0.00399553	0.392407	0.0112256	lab
884	B	39	X	6	10	351.55	6.79528	2.74015	0.0806768	0.00221067	0.327233	0.0089667	lab
884	B	40	X	1	130	354.95	6.86068	2.5562	0.153796	0.00393134	0.278139	0.00710978	lab
884	B	40	X	3	76	357.36	6.90704	2.16078	0	0	0.15	0.00324117	ship
884	B	40	X	4	20	358.35	6.92608	2.55259	1.2073	0.0308174	0.27084	0.00691344	lab
884	B	40	X	6	60	361.75	6.99148	2.86404	0.563633	0.0161427	0.279604	0.00800797	lab
884	B	41	X	2	50	365.15	7.05687	2.7385	0.386568	0.0105862	0.200428	0.00548873	lab
884	B	41	X	3	66	366.76	7.08784	2.5577	0	0	0.15	0.00383654	ship
884	B	41	X	4	90	368.55	7.17367	1.30416	0.478649	0.00624236	0.167123	0.00217956	lab
884	B	41	X	6	130	371.95	7.40485	1.43283	0.422898	0.0060594	0.164717	0.00236011	lab
884	B	42	X	2	110	375.35	7.56106	1.11478	0.152263	0.0016974	0.236833	0.00264016	lab
884	B	42	X	3	77	376.47	7.58448	2.08793	0	0	0.11	0.00229673	ship
884	B	42	X	5	0	378.75	7.63217	1.94821	0.0364087	0.000709318	0.16504	0.00321533	lab
884	B	42	X	7	40	382.15	7.71511	2.00417	0.122326	0.00245162	0.205147	0.00411149	lab
884	B	43	X	3	10	385.55	7.78893	2.5807	0.282421	0.00728845	0.168286	0.00434297	lab
884	B	43	X	3	61	386.01	7.79892	2.63175	0	0	0.1	0.00263175	ship
884	B	43	X	5	50	388.95	7.86275	2.56615	1.76643	0.0453293	0.229932	0.00590042	lab
884	B	44	X	1	30	392.35	7.93657	2.64411	0.346591	0.00916425	0.158392	0.00418807	lab
884	B	44	X	3	74	395.74	8.01017	2.32356	0	0	0.01	0.000232356	ship
884	B	44	X	3	70	395.75	8.01039	2.3145	0	0	0.191002	0.00442075	lab
884	B	44	X	5	110	399.15	8.0842	1.99084	1.24735	0.0248328	0.154869	0.0030832	lab
884	B	45	X	1	80	402.55	8.1925	2.12424	13.0786	0.27782	0.161462	0.00342982	lab
884	B	45	X	3	78	405.48	8.29911	2.03334	6.2	0.126067	0.12	0.00244001	ship
884	B	45	X	3	120	405.95	8.31621	1.96411	5.12563	0.100673	0.144419	0.00283654	lab
884	B	45	X	6	10	409.35	8.43991	2.02196	6.99582	0.141453	0.204239	0.00412962	lab
884	B	46	X	1	135	412.7	8.56179	2.27886	20.8881	0.476012	0.203156	0.00462964	lab
884	B	46	X	3	82	415.12	8.64984	2.07329	17.6	0.364899	0.19	0.00393925	ship
884	B	46	X	4	25	416.1	8.6855	2.24171	20.9527	0.469699	0.16995	0.00380978	lab
884	B	46	X	6	65	419.5	8.79081	1.85286	4.53341	0.0839979	0.213273	0.00395166	lab
884	B	47	X	2	45	422.9	8.85497	2.17467	0.350974	0.00763254	0.140965	0.00306552	lab
884	B	47	X	3	88	424.78	8.89045	2.06038	0	0	0.1	0.00206038	ship
884	B	47	X	4	85	426.3	8.91913	1.96511	1.53303	0.0301257	0.170558	0.00335165	lab
884	B	47	X	6	125	429.7	8.98329	2.81922	10.6853	0.301242	0.16911	0.00476757	lab
884	B	48	X	2	95	433.1	9.04745	2.60808	2.38966	0.0623243	0.227145	0.00592414	lab
884	B	48	X	3	60	434.2	9.0682	2.7301	19.5	0.53237	0.09	0.00245709	ship
884	B	48	X	4	135	436.5	9.12102	2.28571	7.59673	0.173639	0.181581	0.0041504	lab
884	B	49	X	1	10	440.35	9.29727	1.99043	0.287252	0.00571755	0.174673	0.00347675	lab
884	B	49	X	3	98	444.18	9.40022	1.61452	0	0	0.15	0.00242179	ship
884	B	49	X	5	90	447.15	9.49904	1.8391	0.34659	0.00637415	0.16	0.00294256	lab
884	B	50	X	1	70	450.55	9.6264	1.72599	0.34659	0.0059821	0.16	0.00276158	lab
884	B	50	X	3	110	453.95	9.80388	1.49544	22.5599	0.337371	0.24251	0.0036266	lab
884	B	50	X	6	5	457.4	9.94024	1.91547	13.0958	0.250847	0.123292	0.00236162	lab
884	B	51	X	1	135	460.7	10.0318	2.25461	1.24507	0.0280715	0.325279	0.00733376	lab
884	B	51	X	3	72	463.02	10.0886	1.7886	0	0	0.31	0.00554466	ship
884	B	51	X	4	25	464.1	10.1151	2.34821	1.98391	0.0465863	0.231051	0.00542555	lab
884	B	51	X	6	65	467.5	10.1984	2.63325	0.361647	0.00952308	0.156329	0.00411653	lab
884	B	52	X	2	45	470.9	10.2817	2.541	1.86912	0.0474945	0.235412	0.00598181	lab
884	B	52	X	3	80	472.7	10.3258	2.43766	0	0	0.09	0.0021939	ship
884	B	52	X	4	85	474.3	10.365	2.5447	0.169584	0.00431541	0.160758	0.0040908	lab
884	B	52	X	6	125	477.7	10.4483	2.365	0.866649	0.021	0.149294	0.0035	lab
884	B	53	X	2	95	481.1	10.5316	2.18412	0.542615	0.0118514	0.265815	0.00580572	lab
884	B	53	X	3	91	482.51	10.5662	2.37864	1.2	0.0285437	0.09	0.00214078	ship
884	B	53	X	4	135	484.5	10.6149	2.16642	0.186094	0.00403157	0.158612	0.0034362	lab
884	B	53	X	7	25	487.9	10.6983	2.42739	0.45469	0.0110371	0.163439	0.0039673	lab
884	B	54	X	3	90	492.1	10.8012	1.94596	0	0	0.1	0.00194596	ship
884	B	54	X	5	45	494.7	10.8649	1.9517	0.391801	0.0076468	0.178869	0.00349099	lab
884	B	55	X	1	25	498.1	10.9482	2.04767	0.214631	0.00439493	0.127711	0.0026151	lab
884	B	55	X	3	67	501.47	11.0308	2.37675	0.7	0.0166372	0.16	0.0038028	ship
884	B	55	X	3	65	501.5	11.0315	2.27878	0	0	0.306934	0.00699435	lab
884	B	55	X	5	105	504.9	11.1869	1.58195	0.617386	0.00976671	0.204617	0.00323693	lab
884	B	56	X	3	101	511.41	11.5421	1.68706	0	0	0.12	0.00202447	ship
884	B	56	X	3	125	511.7	11.558	1.38549	0.182055	0.00252236	0.174689	0.0024203	lab
884	B	57	X	1	135	518.5	11.929	1.31962	0.117313	0.0015481	0.246087	0.00324742	lab
884	B	57	X	3	57	520.67	12.0474	1.34296	0	0	0.12	0.00161156	ship
884	B	57	X	4	25	521.9	12.1561	0.750895	0.573094	0.00430334	0.354768	0.00266393	lab
884	B	57	X	6	65	525.3	12.4269	0.899089	0.239675	0.00215489	0.173688	0.00156161	lab
884	B	58	X	1	0	526.75	12.5523	0.703625	0	0	0.257369	0.00181091	lab
884	B	58	X	1	132	528.07	12.6901	0.963138	0	0	0.116152	0.0011187	lab
884	B	58	X	2	114	529.39	12.7558	1.51054	2.13517	0.0322525	0.150545	0.00227404	lab
884	B	58	X	3	91	530.61	12.806	1.71745	0	0	0.08	0.00137396	ship
884	B	58	X	4	78	532.03	12.8688	1.53721	1.83062	0.0281405	0.233475	0.00358899	lab
884	B	58	X	5	60	533.35	12.9363	1.40588	0	0	0.130371	0.00183286	lab
884	B	58	X	6	42	534.67	13.0129	1.09394	0	0	0.200737	0.00219594	lab
884	B	58	X	7	24	535.99	13.1101	1.02172	0	0	0.263198	0.00268914	lab
884	B	59	X	1	84	537.29	13.2127	0.729581	18.6031	0.135725	0.157987	0.00115264	lab
884	B	59	X	2	66	538.61	13.3168	0.985366	19.9117	0.196203	0.168892	0.00166421	lab
884	B	59	X	3	48	539.93	13.421	0.947866	0.209843	0.00198903	0.27281	0.00258588	lab
884	B	59	X	3	80	540.2	13.4423	0.910479	1.2	0.0109257	0.14	0.00127467	ship
884	B	59	X	4	30	541.25	13.5252	0.864742	11.0949	0.0959422	0.154142	0.00133293	lab
884	B	59	X	5	12	542.57	13.6275	0.876408	17.5768	0.154045	0.1238	0.00108499	lab
884	B	59	X	6	0	543.95	13.7269	0.93324	0.00363281	3.39029e-05	0.148419	0.00138511	lab
884	B	59	X	6	132	545.27	13.8221	1.0072	0.339902	0.00342349	0.13072	0.00131661	lab
884	B	60	X	1	45	546.6	13.9179	0.97903	1.02113	0.0099972	0.118829	0.00116337	lab
884	B	60	X	2	26	547.91	14.0124	0.951392	0.343768	0.00327058	0.113107	0.00107609	lab
884	B	60	X	3	8	549.23	14.1075	0.998228	1.11367	0.011117	0.143782	0.00143527	lab
884	B	60	X	3	64	549.74	14.1443	1.05442	0	0	0.1	0.00105442	ship
884	B	60	X	3	140	550.55	14.1903	0.913597	0.627074	0.00572893	0.0986341	0.000901118	lab
884	B	60	X	4	122	551.87	14.2557	1.06417	3.27385	0.0348392	0.0969215	0.00103141	lab
884	B	60	X	5	104	553.19	14.3211	1.09883	1.59651	0.017543	0.095423	0.00104854	lab
884	B	60	X	6	86	554.51	14.3865	1.11256	7.74819	0.0862029	0.100433	0.00111738	lab
884	B	61	X	1	18	555.83	14.4519	0.995504	0.203874	0.00202957	0.111812	0.00111309	lab
884	B	61	X	2	0	557.15	14.5173	1.06154	0.319135	0.00338776	0.109229	0.00115952	lab
884	B	61	X	2	132	558.47	14.5827	1.07543	0	0	0.200444	0.00215563	lab
884	B	61	X	3	62	559.22	14.6233	0.986445	0	0	0.07	0.000690512	ship
884	B	61	X	3	114	559.79	14.6603	1.16874	0	0	0.144762	0.00169189	lab
884	B	61	X	4	96	561.11	14.7461	1.01587	0.0775843	0.000788155	0.102234	0.00103857	lab
884	B	61	X	5	78	562.43	14.832	1.00472	0.0307952	0.000309406	0.0974142	0.000978743	lab
884	B	61	X	6	60	563.75	14.9177	1.01742	0.196265	0.00199684	0.11325	0.00115222	lab
884	B	61	X	7	30	564.95	14.9958	0.940806	0.386502	0.00363623	0.144662	0.00136099	lab
884	B	62	X	1	92	566.27	15.0816	0.852501	0.218656	0.00186405	0.0974886	0.000831092	lab
884	B	62	X	2	74	567.59	15.1673	0.871703	0	0	0.118395	0.00103206	lab
884	B	62	X	3	56	568.91	15.2532	0.811727	0	0	0.121352	0.000985051	lab
884	B	62	X	3	78	569.08	15.2642	0.771545	0	0	0.09	0.000694391	ship
884	B	62	X	4	38	570.23	15.339	0.79316	0.477656	0.00378858	0.19839	0.00157355	lab
884	B	62	X	5	20	571.55	15.4247	0.891833	0	0	0.138941	0.00123912	lab
884	B	62	X	6	2	572.87	15.5106	0.850593	0.214381	0.00182351	0.105362	0.000896198	lab
884	B	63	X	1	0	574.85	15.6392	0.874317	0.191522	0.00167451	0.0912714	0.000798001	lab
884	B	63	X	1	132	576.17	15.7251	0.708055	0.182142	0.00128967	0.0863251	0.000611229	lab
884	B	63	X	2	114	577.49	15.8109	0.803952	0.83891	0.00674444	0.0949595	0.000763429	lab
884	B	63	X	3	57	578.37	15.868	0.786621	0	0	0.27	0.00212388	ship
884	B	63	X	3	96	578.81	15.8966	0.763774	0.884923	0.00675881	0.0932203	0.000711992	lab
884	B	63	X	4	78	580.13	15.9855	0.774963	4.57535	0.0354573	0.0965479	0.000748211	lab
884	B	63	X	5	60	581.45	16.1028	0.829366	16.9125	0.140267	0.123099	0.00102094	lab
884	B	63	X	6	42	582.77	16.22	0.847719	0.117015	0.000991955	0.153617	0.00130224	lab
884	B	63	X	7	28	583.63	16.2964	0.714774	5.46308	0.0390487	0.142447	0.00101818	lab
884	B	64	X	2	78	586.73	16.5716	0.884048	18.9782	0.167777	0.118315	0.00104596	lab
884	B	64	X	3	60	588.05	16.6889	0.882797	6.73735	0.0594771	0.0940993	0.000830706	lab
884	B	64	X	3	68	588.08	16.6915	0.882768	1.1	0.00971045	0.49	0.00432557	ship
884	B	64	X	5	24	590.69	16.9233	0.880295	47.7336	0.420196	0.116624	0.00102664	lab
884	B	64	X	6	10	591.35	16.9819	0.879669	41.7109	0.366918	0.106215	0.000934345	lab
884	B	64	X	6	138	592.63	17.0956	0.878456	16.5389	0.145287	0.116779	0.00102586	lab
884	B	65	X	1	50	594.65	17.2629	0.914479	10.1277	0.092616	0.176412	0.00161325	lab
884	B	65	X	2	32	595.97	17.3449	0.767331	1.20072	0.0092135	0.133772	0.00102647	lab
884	B	65	X	3	14	597.29	17.4268	0.773467	4.33514	0.0335309	0.127654	0.000987362	lab
884	B	65	X	4	0	598.65	17.5113	0.561661	10.1519	0.0570191	0.13541	0.000760543	lab
884	B	65	X	4	132	599.97	17.6665	0.794841	29.0677	0.231042	0.0987187	0.000784657	lab
884	B	65	X	5	114	601.29	17.8482	0.613749	22.6591	0.13907	0.145049	0.000890236	lab
884	B	65	X	6	96	602.61	18.0298	0.536694	53.5836	0.28758	0.0901239	0.00048369	lab
884	B	66	X	1	0	603.85	18.299	0.28623	3.76552	0.010778	0.154186	0.000441325	lab
884	B	66	X	1	62	604.47	18.4424	0.255318	10.4084	0.0265746	0.124165	0.000317015	lab
884	B	66	X	1	124	605.08	18.5836	0.328891	0.172625	0.000567748	0.140257	0.000461294	lab
884	B	66	X	2	36	605.71	18.7293	0.355161	0	0	0.127003	0.000451064	lab
884	B	66	X	3	10	606.95	19.0163	0.46397	0.421959	0.00195776	0.140602	0.000652348	lab
884	B	66	X	3	75	607.55	19.1551	0.415521	0	0	0.08	0.000332417	ship
884	B	66	X	3	72	607.57	19.1597	0.4043	0	0	0.169005	0.000683287	lab
884	B	66	X	3	134	608.19	19.3032	0.437352	31.4451	0.137526	0.112953	0.000494002	lab
884	B	66	X	4	46	608.81	19.4466	0.406834	24.3337	0.0989981	0.0672394	0.000273553	lab
884	B	66	X	4	108	609.43	19.5901	0.424672	35.9013	0.152463	0.0607843	0.000258134	lab
884	B	66	X	5	20	610.05	19.7336	0.400115	8.96268	0.0358611	0.0891689	0.000356778	lab
884	B	66	X	5	82	610.67	19.877		0.106185		0.15277		lab
884	B	66	X	6	0	611.35	20.0344		0.120076		0.0806643		lab
884	B	66	X	6	62	611.97	20.1778		0.225773		0.118222		lab
884	B	67	X	1	0	613.35	20.4972		10.8754		0.165378		lab
884	B	67	X	1	62	613.97	20.6406		0.449709		0.115011		lab
884	B	67	X	1	124	614.59	20.7841		1.60553		0.166686		lab
884	B	67	X	2	36	615.21	20.9275		0.225835		0.140113		lab
