# Supplementary material for: Variations in the Biological Pump through the Miocene: Evidence from organic carbon burial in Pacific Ocean sediments
Source: Copernicus journal article supplement (doi:10.5194/cp-2024-34), 2024-05-27
Supplement: Supplementary file 39 [file SuppTable_S9_1208A_pmag_Data.xlsx]

## Sheet: SuppTable_S9_U1208A_pmag_Data
Site	Hole	MagnetoChron	Depth (mbsf)	Age (Ma)	Sedimentation rate (cm/kyr)
1208	A	C1n top	0	0	5.49552
1208	A	C1n base	42.92	0.781	5.32085
1208	A	C1r.1n top	52.57	0.988	4.4433
1208	A	C1r.1n base	55.85	1.072	4.65405
1208	A	C1r.2r.1n top	61.18	1.173	5.15044
1208	A	C1r.2r.1n base	61.67	1.185	3.93884
1208	A	C2n top	85.01	1.778	4.09737
1208	A	C2n base	92.81	1.945	4.24286
1208	A	C2r.1n top	99.86	2.128	4.03941
1208	A	C2r.1n base	101.01	2.148	4.3245
1208	A	C2An.1n top	119.45	2.581	4.16176
1208	A	C2An.1n base	137.8	3.032	3.96075
1208	A	C2An.2n top	140.64	3.116	3.87429
1208	A	C2An.2n base	144.58	3.207	3.3271
1208	A	C2An.3n top	147.76	3.33	3.16195
1208	A	C2An.3n base	156.88	3.596	2.87515
1208	A	C3n.1n top	172.4	4.187	2.78267
1208	A	C3n.1n base	176.47	4.3	3.30392
1208	A	C3n.2n top	182.51	4.493	2.71601
1208	A	C3n.2n base	185.46	4.631	2.21242
1208	A	C3n.3n top	189.28	4.799	2.09434
1208	A	C3n.3n base	191.01	4.896	2.42929
1208	A	C3n.4n top	194.09	4.997	2.66372
1208	A	C3n.4n base	200.04	5.235	2.18129
1208	A	C3An.1n top	216.47	6.023	2.0704
1208	A	C3An.1n base	221.51	6.272	1.59229
1208	A	C3An.2n top	222.25	6.386	2.17143
1208	A	C3An.2n base	231.39	6.727	1.81894
1208	A	C3Bn top	235.31	7.104	1.83778
1208	A	C3Bn base	240.34	7.214	1.27089
1208	A	C3Br.2n base	240.33	7.499	0.229102
1208	A	C4n.1n top	241.08	7.537	0.986842
1208	A	C4n.1n base	241.83	7.651	1.14024
1208	A	C4n.2n top	242.95	7.701	1.96272
1208	A	C4n.2n base	250.78	8.107	1.63738
1208	A	C4r.1n top	251.71	8.236	0.870466
1208	A	C4r.1n base	252.46	8.3	0.801869
1208	A	C4An top	256	8.771	1.01863
1208	A	C4An base	260.66	9.105	1.20926
1208	A	C4Ar.1n top	262.53	9.311	1.04673
1208	A	C4Ar.1n base	264.02	9.426	0.940476
1208	A	C4Ar.2n top	265.69	9.647	1.38983
1208	A	C4Ar.2n base	268.12	9.721	2.41727
1208	A	C5n.1n top	269.05	9.786	1.72685
1208	A	C5n.1n base	271.85	9.937	1.02756
1208	A	C5n.2n base	282.1	11.056	1.26468
1208	A	C5r.1n top	287.14	11.146	4.23485
1208	A	C5r.1n base	287.69	11.188	0.751121
1208	A	C5r.2n top	290.49	11.592	0.795309
1208	A	C5r.2n base	291.42	11.657	0.367615
1208	A	C5An.1n top	292.17	12.049	0.504836
1208	A	C5An.1n base	294.03	12.174	2.92377
1208	A	C5An.2n top	298.69	12.272	1.86667
1208	A	C5An.2n base	299.63	12.474	0.465347
